# Supplementary material for: Integrative microRNA-gene expression network analysis in genetic hypercalciuric stone-forming rat kidney
Source: PeerJ. 2016 Mar 31;4:e1884. doi: 10.7717/peerj.1884 (PMC4824905; doi:10.7717/peerj.1884)
Supplement: Table S1 [file peerj-04-1884-s001.xlsx]

## Sheet: Sheet1
GAPDH	F	TGGGTGTGAACCATGAGAAG	R	GTGTCGCTGTTGAAGTCAGA
Gcnt1	F	AGCCCTGGAGACCTTAGAAC	R	ATAGGAGGACCCGATAGGAG
Lpin2	F	TGAGGTCCAAGGAGAAGGTGC	R	GGTGAGGTGGCAAGATAAGC
olr1	F	TTATCAGTGACCCTTATTGTAC	R	AGTTCCCTCTTTGATTCTTG
sema5a	F	GTTCAGAAGCATAGCGTTGTC	R	GTTGAGGGAGTTGGCAGTAG
NFκB	F	GTGTTCACAGACCTGGCATC	R	TTCAGGGTACTCCATCAGCA
Rela	F	TTCCTGGCGAGAGAAGCAC	R	AAGCTATGGATACTGCGGTCT
VDR	F	AATGGAGATTGCCGCATCAC	R	TGTCCACACAGCGTTTGA
CaSR	F	TTCGGCATCAGCTTTGTG	R	TGAAGATGATTTCGTCTTCC
rno-miR-184	RmiRQP0245	http://www.fulengen.com/product/search/detail.php?prt=15&cid=&key=RmiR6073&tab=qpcr
rno-miR-21-3p	RmiRQP0929	http://www.fulengen.com/product/search/detail.php?prt=15&cid=&key=RmiR6105&tab=qpcr
rno-miR-672-5p	RmiRQP1097	http://www.fulengen.com/product/search/detail.php?prt=15&cid=&key=RmiR6248&tab=qpcr
rno-miR-674-5p	RmiRQP1281	http://www.fulengen.com/product/search/detail.php?prt=15&cid=&key=RmiR6250&tab=qpcr
rno-miR-206-3p	RmiRQP0308	http://www.fulengen.com/product/search/detail.php?prt=15&cid=&key=RmiR6100&tab=qpcr
rno-miR-196c-3p	RmiRQP3366	http://www.fulengen.com/product/search/detail.php?prt=15&cid=&key=RmiR6089&tab=qpcr
rno-miR-138-5p	RmiRQP0177	http://www.fulengen.com/product/search/detail.php?prt=15&cid=&key=RmiR6044&tab=qpcr
rno-miR-203a-3p	RmiRQP0305	http://www.fulengen.com/product/search/detail.php?prt=15&cid=&key=RmiR6097&tab=qpcr
rno-miR-201-3p	RmiRQP3450	http://www.fulengen.com/product/search/detail.php?prt=15&cid=&key=RmiR6312&tab=qpcr
rno-miR-138-1-3p	RmiRQP0883	http://www.fulengen.com/product/search/detail.php?prt=15&cid=&key=RmiR6044&tab=qpcr
rno-miR-484	RmiRQP0519	http://www.fulengen.com/product/search/detail.php?prt=15&cid=&key=RmiR6222&tab=qpcr
U6	RmiRQP9003
