# Supplementary material for: Integrative microRNA-gene expression network analysis in genetic hypercalciuric stone-forming rat kidney
Source: PeerJ. 2016 Mar 31;4:e1884. doi: 10.7717/peerj.1884 (PMC4824905; doi:10.7717/peerj.1884)
Supplement: Table S3 — Information on differentially expressed mRNAs. [file peerj-04-1884-s003.xlsx]

## Sheet: different genes
Probe Set ID	Gene Symbol	Gene Description	P-value	FDR	Geom mean of intensities in class GHS	Geom mean of intensities in class NOR	Fold-change	style	mRNA Accession	mRNA Source	mRna - Description	Chromosome	Strand	Start	Stop	GO Biological Process ID	GO Biological Process Term	GO Biological Process Evidence	GO Cellular Component ID	GO Cellular Component Term	GO Cellular Component Evidence	GO Molecular Function ID	GO Molecular Function Term	GO Molecular Function Evidence	Pathway Source	Pathway Name	Protein Domains - Source	Protein Domains - Accession or domain name	Protein Domains - Description	category	NOR1_(RaGene-1_0-st-v1).rma-gene-default-Signal	NOR2_(RaGene-1_0-st-v1).rma-gene-default-Signal	NOR3_(RaGene-1_0-st-v1).rma-gene-default-Signal	GHS1_(RaGene-1_0-st-v1).rma-gene-default-Signal	GSH2_(RaGene-1_0-st-v1).rma-gene-default-Signal	GSH3_(RaGene-1_0-st-v1).rma-gene-default-Signal
10844331	Lcn2	lipocalin 2	0.0007344	0.161	17.66	300.06	16.9492	up	ENSRNOT00000018776 // NM_130741 // BC089053	ENSEMBL // RefSeq // GenBank	cdna:known chromosome:Rnor_5.0:3:16763059:16766466:-1 gene:ENSRNOG00000013973 gene_biotype:protein_coding transcript_biotype:protein_coding // Rattus norvegicus lipocalin 2 (Lcn2), mRNA. // Rattus norvegicus lipocalin 2, mRNA (cDNA clone MGC:105339 IMAGE:7310185), complete cds.	chr3	-	11511402	11514809	GO:0006811 // GO:0006915 // GO:0006979 // GO:0009615 // GO:0009615 // GO:0009617 // GO:0009635 // GO:0009636 // GO:0010628 // GO:0015891 // GO:0015891 // GO:0031346 // GO:0031667 // GO:0031669 // GO:0042493 // GO:0042493 // GO:0042981 // GO:0042981 // GO:0045087 // GO:0045087 // GO:0070207 // GO:0070301 // GO:0071222 // GO:0071347 // GO:0071356 // GO:0015891 // GO:0042981 // GO:0045087 // GO:0006…	ion transport // apoptotic process // response to oxidative stress // response to virus // response to virus // response to bacterium // response to herbicide // response to toxic substance // positive regulation of gene expression // siderophore transport // siderophore transport // positive regulation of cell projection organization // response to nutrient levels // cellular response to nutrien…	inferred from electronic annotation // inferred from electronic annotation // inferred from expression pattern // inferred from electronic annotation // not recorded // inferred from expression pattern // inferred from direct assay // inferred from expression pattern // inferred from direct assay // not recorded // inferred from sequence or structural similarity // inferred from direct assay // i…	GO:0005576 // GO:0005576 // GO:0005615 // GO:0005737 // GO:0005829 // GO:0005576 // GO:0005737 // GO:0005576 // GO:0005576 // GO:0005615 // GO:0005737 // GO:0005829 // GO:0005576 // GO:0005737 // GO:0005576 // GO:0005576 // GO:0005615 // GO:0005737 // GO:0005829 // GO:0005576 // GO:0005737	extracellular region // extracellular region // extracellular space // cytoplasm // cytosol // extracellular region // cytoplasm // extracellular region // extracellular region // extracellular space // cytoplasm // cytosol // extracellular region // cytoplasm // extracellular region // extracellular region // extracellular space // cytoplasm // cytosol // extracellular region // cytoplasm	not recorded // inferred from sequence or structural similarity // inferred from direct assay // not recorded // inferred from direct assay // inferred from electronic annotation // inferred from electronic annotation // not recorded // inferred from sequence or structural similarity // inferred from direct assay // not recorded // inferred from direct assay // inferred from electronic annotation…	GO:0002020 // GO:0005215 // GO:0005506 // GO:0005506 // GO:0036094 // GO:0042803 // GO:0005515 // GO:0005506 // GO:0002020 // GO:0005215 // GO:0005506 // GO:0005506 // GO:0036094 // GO:0042803 // GO:0005506 // GO:0002020 // GO:0005215 // GO:0005506 // GO:0005506 // GO:0036094 // GO:0042803 // GO:0005506	protease binding // transporter activity // iron ion binding // iron ion binding // small molecule binding // protein homodimerization activity // protein binding // iron ion binding // protease binding // transporter activity // iron ion binding // iron ion binding // small molecule binding // protein homodimerization activity // iron ion binding // protease binding // transporter activity // ir…	inferred from physical interaction // inferred from electronic annotation // not recorded // inferred from sequence or structural similarity // inferred from electronic annotation // inferred from direct assay // inferred from electronic annotation // inferred from electronic annotation // inferred from physical interaction // inferred from electronic annotation // not recorded // inferred from s…	---	---	Pfam	IPR000566	Lipocalin/cytosolic fatty-acid binding protein domain	main	4.05681	4.19329	4.20349	7.40425	10.138	7.19791
10859262	Apold1	apolipoprotein L domain containing 1	0.0003997	0.143	29.92	249.13	8.33333	up	NM_001003403 // ENSRNOT00000010289 // AY673969	RefSeq // ENSEMBL // GenBank	Rattus norvegicus apolipoprotein L domain containing 1 (Apold1), mRNA. // cdna:known chromosome:Rnor_5.0:4:233025350:233028240:1 gene:ENSRNOG00000007830 gene_biotype:protein_coding transcript_biotype:protein_coding // Rattus norvegicus vascular early response gene protein (Verge) mRNA, complete cds.	chr4	+	171903246	171907688	GO:0001525 // GO:0001666 // GO:0006869 // GO:0030154 // GO:0042118 // GO:0042157 // GO:0045601 // GO:0001525 // GO:0007275 // GO:0001525 // GO:0001666 // GO:0006869 // GO:0030154 // GO:0042118 // GO:0042157 // GO:0045601 // GO:0001525 // GO:0007275 // GO:0001525 // GO:0001666 // GO:0006869 // GO:0030154 // GO:0042118 // GO:0042157 // GO:0045601 // GO:0001525 // GO:0007275	angiogenesis // response to hypoxia // lipid transport // cell differentiation // endothelial cell activation // lipoprotein metabolic process // regulation of endothelial cell differentiation // angiogenesis // multicellular organismal development // angiogenesis // response to hypoxia // lipid transport // cell differentiation // endothelial cell activation // lipoprotein metabolic process // r…	inferred from expression pattern // inferred from expression pattern // inferred from electronic annotation // inferred from electronic annotation // inferred from expression pattern // inferred from electronic annotation // inferred from expression pattern // inferred from electronic annotation // inferred from electronic annotation // inferred from expression pattern // inferred from expression…	GO:0005576 // GO:0005886 // GO:0016021 // GO:0016020 // GO:0005576 // GO:0005886 // GO:0016021 // GO:0016020 // GO:0005576 // GO:0005886 // GO:0016021 // GO:0016020	extracellular region // plasma membrane // integral to membrane // membrane // extracellular region // plasma membrane // integral to membrane // membrane // extracellular region // plasma membrane // integral to membrane // membrane	inferred from electronic annotation // inferred from electronic annotation // inferred from electronic annotation // inferred from electronic annotation // inferred from electronic annotation // inferred from electronic annotation // inferred from electronic annotation // inferred from electronic annotation // inferred from electronic annotation // inferred from electronic annotation // inferred …	GO:0008289 // GO:0008289 // GO:0008289	lipid binding // lipid binding // lipid binding	inferred from electronic annotation // inferred from electronic annotation // inferred from electronic annotation	---	---	Pfam	IPR008405	Apolipoprotein L	main	4.3824	5.98348	4.37067	7.37365	7.97461	8.58692
10775900	Cxcl1	chemokine (C-X-C motif) ligand 1 (melanoma growth stimulating activity, alpha)	0.0041017	0.251	60.77	347.68	5.88235	up	ENSRNOT00000003778 // NM_030845 // M86536	ENSEMBL // RefSeq // GenBank	cdna:known chromosome:Rnor_5.0:14:18653039:18654811:-1 gene:ENSRNOG00000002802 gene_biotype:protein_coding transcript_biotype:protein_coding // Rattus norvegicus chemokine (C-X-C motif) ligand 1 (melanoma growth stimulating activity, alpha) (Cxcl1), mRNA. // Rattus norvegicus KC protein mRNA, complete cds.	chr14	-	18690339	18692118	GO:0001975 // GO:0002526 // GO:0006955 // GO:0007204 // GO:0009408 // GO:0010332 // GO:0010765 // GO:0030593 // GO:0032355 // GO:0032496 // GO:0043268 // GO:0051384 // GO:0006954 // GO:0001975 // GO:0002526 // GO:0006955 // GO:0007204 // GO:0009408 // GO:0010332 // GO:0010765 // GO:0030593 // GO:0032355 // GO:0032496 // GO:0043268 // GO:0051384 // GO:0006954 // GO:0001975 // GO:0002526 // GO:0006…	response to amphetamine // acute inflammatory response // immune response // elevation of cytosolic calcium ion concentration // response to heat // response to gamma radiation // positive regulation of sodium ion transport // neutrophil chemotaxis // response to estradiol stimulus // response to lipopolysaccharide // positive regulation of potassium ion transport // response to glucocorticoid st…	inferred from expression pattern // inferred from direct assay // inferred from electronic annotation // inferred from direct assay // inferred from expression pattern // inferred from expression pattern // inferred from direct assay // inferred from direct assay // inferred from expression pattern // inferred from expression pattern // inferred from direct assay // inferred from expression patte…	GO:0005615 // GO:0005615 // GO:0005615 // GO:0005576 // GO:0005615 // GO:0005615 // GO:0005615 // GO:0005576 // GO:0005615 // GO:0005615 // GO:0005615 // GO:0005576	extracellular space // extracellular space // extracellular space // extracellular region // extracellular space // extracellular space // extracellular space // extracellular region // extracellular space // extracellular space // extracellular space // extracellular region	inferred from direct assay // inferred from electronic annotation // not recorded // inferred from electronic annotation // inferred from direct assay // inferred from electronic annotation // not recorded // inferred from electronic annotation // inferred from direct assay // inferred from electronic annotation // not recorded // inferred from electronic annotation	GO:0008009 // GO:0008009 // GO:0008083 // GO:0005125 // GO:0008009 // GO:0008009 // GO:0008083 // GO:0005125 // GO:0008009 // GO:0008009 // GO:0008083 // GO:0005125	chemokine activity // chemokine activity // growth factor activity // cytokine activity // chemokine activity // chemokine activity // growth factor activity // cytokine activity // chemokine activity // chemokine activity // growth factor activity // cytokine activity	inferred from direct assay // inferred from electronic annotation // inferred from electronic annotation // inferred from electronic annotation // inferred from direct assay // inferred from electronic annotation // inferred from electronic annotation // inferred from electronic annotation // inferred from direct assay // inferred from electronic annotation // inferred from electronic annotation …	---	---	Pfam	IPR001811	Chemokine interleukin-8-like domain	main	5.38958	5.99186	6.42216	6.98832	9.01688	9.3725
10714450	Tmem252	transmembrane protein 252	1.08e-05	0.0313	473.61	2696.68	5.55556	up	NM_001007738 // ENSRNOT00000035123	RefSeq // ENSEMBL	Rattus norvegicus transmembrane protein 252 (Tmem252), mRNA. // cdna:known chromosome:Rnor_5.0:1:249846442:249851698:1 gene:ENSRNOG00000025476 gene_biotype:protein_coding transcript_biotype:protein_coding	chr1	+	228097429	228102637	---	---	---	GO:0016021 // GO:0016020 // GO:0016021 // GO:0016020	integral to membrane // membrane // integral to membrane // membrane	inferred from electronic annotation // inferred from electronic annotation // inferred from electronic annotation // inferred from electronic annotation	---	---	---	---	---	---	---	---	main	9.23766	9.10045	8.35211	11.3978	11.4202	11.4258
10907913	Mmp8	matrix metallopeptidase 8	0.0055783	0.275	17.2	93.09	5.55556	up	NM_022221 // ENSRNOT00000013936	RefSeq // ENSEMBL	Rattus norvegicus matrix metallopeptidase 8 (Mmp8), mRNA. // cdna:known chromosome:Rnor_5.0:8:5771724:5780576:1 gene:ENSRNOG00000009907 gene_biotype:protein_coding transcript_biotype:protein_coding	chr8	+	4402124	4410981	GO:0001503 // GO:0006508 // GO:0006508 // GO:0006508 // GO:0006508 // GO:0030574 // GO:0001503 // GO:0006508 // GO:0006508 // GO:0006508 // GO:0006508 // GO:0030574 // GO:0008152	ossification // proteolysis // proteolysis // proteolysis // proteolysis // collagen catabolic process // ossification // proteolysis // proteolysis // proteolysis // proteolysis // collagen catabolic process // metabolic process	inferred from expression pattern // inferred from direct assay // inferred from electronic annotation // not recorded // inferred from sequence or structural similarity // inferred from electronic annotation // inferred from expression pattern // inferred from direct assay // inferred from electronic annotation // not recorded // inferred from sequence or structural similarity // inferred from el…	GO:0005578 // GO:0005615 // GO:0005615 // GO:0005615 // GO:0005615 // GO:0031012 // GO:0005576 // GO:0005578 // GO:0005615 // GO:0005615 // GO:0005615 // GO:0005615 // GO:0031012 // GO:0005576	proteinaceous extracellular matrix // extracellular space // extracellular space // extracellular space // extracellular space // extracellular matrix // extracellular region // proteinaceous extracellular matrix // extracellular space // extracellular space // extracellular space // extracellular space // extracellular matrix // extracellular region	inferred from electronic annotation // inferred from direct assay // inferred from electronic annotation // not recorded // inferred from sequence or structural similarity // inferred from electronic annotation // inferred from electronic annotation // inferred from electronic annotation // inferred from direct assay // inferred from electronic annotation // not recorded // inferred from sequence…	GO:0004222 // GO:0004252 // GO:0004252 // GO:0004252 // GO:0005509 // GO:0005509 // GO:0008237 // GO:0008270 // GO:0008270 // GO:0008233 // GO:0008237 // GO:0016787 // GO:0046872 // GO:0004222 // GO:0004252 // GO:0004252 // GO:0004252 // GO:0005509 // GO:0005509 // GO:0008237 // GO:0008270 // GO:0008270 // GO:0008237 // GO:0008233 // GO:0016787 // GO:0046872	metalloendopeptidase activity // serine-type endopeptidase activity // serine-type endopeptidase activity // serine-type endopeptidase activity // calcium ion binding // calcium ion binding // metallopeptidase activity // zinc ion binding // zinc ion binding // peptidase activity // metallopeptidase activity // hydrolase activity // metal ion binding // metalloendopeptidase activity // serine-typ…	inferred from electronic annotation // inferred from electronic annotation // not recorded // inferred from sequence or structural similarity // inferred from electronic annotation // inferred from mutant phenotype // inferred from direct assay // inferred from electronic annotation // inferred from mutant phenotype // inferred from electronic annotation // inferred from electronic annotation // …	GenMAPP // GenMAPP	Matrix_Metalloproteinases // Matrix_Metalloproteinases	Pfam // Pfam // Pfam	IPR001818 // IPR002477 // IPR018487	Peptidase M10, metallopeptidase // Peptidoglycan binding-like // Hemopexin-like repeats	main	4.79653	3.67627	3.86673	5.20532	7.73477	6.73436
10886621	Serpina3n	serine (or cysteine) peptidase inhibitor, clade A, member 3N	0.0127359	0.352	36.81	190.08	5.26316	up	ENSRNOT00000014073 // NM_031531 // FQ209856	ENSEMBL // RefSeq // GenBank	cdna:known chromosome:Rnor_5.0:6:137283364:137292168:1 gene:ENSRNOG00000010527 gene_biotype:protein_coding transcript_biotype:protein_coding // Rattus norvegicus serine (or cysteine) peptidase inhibitor, clade A, member 3N (Serpina3n), mRNA. // Rattus norvegicus TL0ABA38YN22 mRNA sequence.	chr6	+	128461775	128469320	GO:0006954 // GO:0010951 // GO:0030162 // GO:0032496 // GO:0034097 // GO:0034516 // GO:0043434 // GO:0043434 // GO:0071320 // GO:0071346 // GO:0071347 // GO:0071354 // GO:0071385 // GO:0010951 // GO:0030162 // GO:0034097 // GO:0010466 // GO:0006954 // GO:0010951 // GO:0030162 // GO:0032496 // GO:0034097 // GO:0034516 // GO:0043434 // GO:0043434 // GO:0071320 // GO:0071346 // GO:0071347 // GO:0071…	inflammatory response // negative regulation of endopeptidase activity // regulation of proteolysis // response to lipopolysaccharide // response to cytokine stimulus // response to vitamin B6 // response to peptide hormone stimulus // response to peptide hormone stimulus // cellular response to cAMP // cellular response to interferon-gamma // cellular response to interleukin-1 // cellular respon…	inferred from expression pattern // not recorded // not recorded // inferred from expression pattern // not recorded // inferred from expression pattern // inferred from electronic annotation // not recorded // inferred from expression pattern // inferred from expression pattern // inferred from expression pattern // inferred from expression pattern // inferred from expression pattern // --- // -…	GO:0005576 // GO:0005615 // GO:0005576 // GO:0005576 // GO:0005615 // GO:0005576 // GO:0005615 // GO:0005576 // GO:0005576 // GO:0005615 // GO:0005576 // GO:0005615 // GO:0005576 // GO:0005576 // GO:0005615	extracellular region // extracellular space // extracellular region // extracellular region // extracellular space // extracellular region // extracellular space // extracellular region // extracellular region // extracellular space // extracellular region // extracellular space // extracellular region // extracellular region // extracellular space	not recorded // inferred from direct assay // --- // inferred from electronic annotation // inferred from electronic annotation // not recorded // inferred from direct assay // --- // inferred from electronic annotation // inferred from electronic annotation // not recorded // inferred from direct assay // --- // inferred from electronic annotation // inferred from electronic annotation	GO:0004867 // GO:0004867 // GO:0004867 // GO:0030414 // GO:0004867 // GO:0004867 // GO:0004867 // GO:0030414 // GO:0004867 // GO:0004867 // GO:0004867 // GO:0030414	serine-type endopeptidase inhibitor activity // serine-type endopeptidase inhibitor activity // serine-type endopeptidase inhibitor activity // peptidase inhibitor activity // serine-type endopeptidase inhibitor activity // serine-type endopeptidase inhibitor activity // serine-type endopeptidase inhibitor activity // peptidase inhibitor activity // serine-type endopeptidase inhibitor activity //…	not recorded // --- // inferred from electronic annotation // inferred from electronic annotation // not recorded // --- // inferred from electronic annotation // inferred from electronic annotation // not recorded // --- // inferred from electronic annotation // inferred from electronic annotation	---	---	Pfam	IPR023796	Serpin domain	main	5.31695	5.61188	4.70483	6.60362	9.38069	6.77987
10749372	Socs3	suppressor of cytokine signaling 3	0.0001442	0.105	51.17	254.21	5	up	NM_053565 // ENSRNOT00000003940 // AF075383	RefSeq // ENSEMBL // GenBank	Rattus norvegicus suppressor of cytokine signaling 3 (Socs3), mRNA. // cdna:known chromosome:Rnor_5.0:10:106612942:106613619:-1 gene:ENSRNOG00000002946 gene_biotype:protein_coding transcript_biotype:protein_coding // Rattus norvegicus suppressor of cytokine signaling-3 (SOCS-3) mRNA, complete cds.	chr10	-	107958468	107959330	GO:0001558 // GO:0001666 // GO:0001932 // GO:0001932 // GO:0007165 // GO:0007165 // GO:0007243 // GO:0007259 // GO:0007259 // GO:0007568 // GO:0009408 // GO:0009617 // GO:0009725 // GO:0009968 // GO:0009968 // GO:0010332 // GO:0014070 // GO:0016567 // GO:0031100 // GO:0032094 // GO:0032355 // GO:0032496 // GO:0032570 // GO:0032868 // GO:0034097 // GO:0035556 // GO:0042493 // GO:0043434 // GO:0045…	regulation of cell growth // response to hypoxia // regulation of protein phosphorylation // regulation of protein phosphorylation // signal transduction // signal transduction // intracellular protein kinase cascade // JAK-STAT cascade // JAK-STAT cascade // aging // response to heat // response to bacterium // response to hormone stimulus // negative regulation of signal transduction // negativ…	traceable author statement // inferred from expression pattern // inferred from electronic annotation // not recorded // inferred from direct assay // traceable author statement // inferred from direct assay // inferred from direct assay // traceable author statement // inferred from expression pattern // inferred from expression pattern // inferred from expression pattern // inferred from expres…	GO:0005737 // GO:0005737 // GO:0005622 // GO:0005737	cytoplasm // cytoplasm // intracellular // cytoplasm	inferred from direct assay // inferred from direct assay // inferred from electronic annotation // inferred from direct assay	GO:0005515	protein binding	inferred from electronic annotation	---	---	Pfam // Pfam	IPR000980 // IPR001496	SH2 domain // SOCS protein, C-terminal	main	5.39158	5.82568	5.84233	7.29492	8.56206	8.16549
10774141	Igfbp1	insulin-like growth factor binding protein 1	0.0023147	0.203	312.47	1569.88	5	up	ENSRNOT00000011338 // NM_013144 // M89791	ENSEMBL // RefSeq // GenBank	cdna:known chromosome:Rnor_5.0:14:81083056:81088123:1 gene:ENSRNOG00000008371 gene_biotype:protein_coding transcript_biotype:protein_coding // Rattus norvegicus insulin-like growth factor binding protein 1 (Igfbp1), mRNA. // Rattus norvegicus insulin-like growth factor-binding protein-1 (IGFBP-1) mRNA, complete cds.	chr14	+	87950222	87955291	GO:0006006 // GO:0008286 // GO:0030307 // GO:0042246 // GO:0048015 // GO:0001558 // GO:0006006 // GO:0008286 // GO:0030307 // GO:0042246 // GO:0048015 // GO:0001558 // GO:0006006 // GO:0008286 // GO:0030307 // GO:0042246 // GO:0048015 // GO:0001558	glucose metabolic process // insulin receptor signaling pathway // positive regulation of cell growth // tissue regeneration // phosphatidylinositol-mediated signaling // regulation of cell growth // glucose metabolic process // insulin receptor signaling pathway // positive regulation of cell growth // tissue regeneration // phosphatidylinositol-mediated signaling // regulation of cell growth //…	traceable author statement // inferred from expression pattern // inferred from expression pattern // inferred from expression pattern // traceable author statement // inferred from electronic annotation // traceable author statement // inferred from expression pattern // inferred from expression pattern // inferred from expression pattern // traceable author statement // inferred from electronic…	GO:0005615 // GO:0005615 // GO:0005576 // GO:0005615 // GO:0005615 // GO:0005615 // GO:0005576 // GO:0005615 // GO:0005615 // GO:0005615 // GO:0005576 // GO:0005615	extracellular space // extracellular space // extracellular region // extracellular space // extracellular space // extracellular space // extracellular region // extracellular space // extracellular space // extracellular space // extracellular region // extracellular space	inferred from direct assay // not recorded // inferred from electronic annotation // inferred from electronic annotation // inferred from direct assay // not recorded // inferred from electronic annotation // inferred from electronic annotation // inferred from direct assay // not recorded // inferred from electronic annotation // inferred from electronic annotation	GO:0005520 // GO:0005520 // GO:0005520 // GO:0019838 // GO:0005520 // GO:0005520 // GO:0005520 // GO:0019838 // GO:0005520 // GO:0005520 // GO:0005520 // GO:0019838	insulin-like growth factor binding // insulin-like growth factor binding // insulin-like growth factor binding // growth factor binding // insulin-like growth factor binding // insulin-like growth factor binding // insulin-like growth factor binding // growth factor binding // insulin-like growth factor binding // insulin-like growth factor binding // insulin-like growth factor binding // growth …	not recorded // traceable author statement // inferred from electronic annotation // inferred from electronic annotation // not recorded // traceable author statement // inferred from electronic annotation // inferred from electronic annotation // not recorded // traceable author statement // inferred from electronic annotation // inferred from electronic annotation	GenMAPP // GenMAPP // GenMAPP	Smooth_muscle_contraction // Smooth_muscle_contraction // Smooth_muscle_contraction	Pfam // Pfam	IPR000716 // IPR000867	Thyroglobulin type-1 // Insulin-like growth factor-binding protein, IGFBP	main	7.64478	9.21485	8.03069	9.73232	11.2167	10.9532
10850841	Dusp15	dual specificity phosphatase 15	0.0415112	0.474	8.58	43.53	5	up	NM_001108598 // NM_001244784 // ENSRNOT00000072663 // ENSRNOT00000011350 // BC168211	RefSeq // RefSeq // ENSEMBL // ENSEMBL // GenBank	Rattus norvegicus dual specificity phosphatase 15 (Dusp15), transcript variant 1, mRNA. // Rattus norvegicus dual specificity phosphatase 15 (Dusp15), transcript variant 2, mRNA. // cdna:known chromosome:Rnor_5.0:3:154820985:154831486:-1 gene:ENSRNOG00000008534 gene_biotype:protein_coding transcript_biotype:protein_coding // cdna:known chromosome:Rnor_5.0:3:154820985:154831486:-1 gene:ENSRNOG0000…	chr3	-	143286180	143294369	GO:0006470 // GO:0006470 // GO:0006470 // GO:0016311 // GO:0035335 // GO:0006470 // GO:0006470 // GO:0006470 // GO:0016311 // GO:0035335 // GO:0006470 // GO:0006470 // GO:0006470 // GO:0016311 // GO:0035335 // GO:0006470 // GO:0006470 // GO:0016311 // GO:0006470 // GO:0035335 // GO:0006470 // GO:0006470 // GO:0006470 // GO:0016311 // GO:0035335	protein dephosphorylation // protein dephosphorylation // protein dephosphorylation // dephosphorylation // peptidyl-tyrosine dephosphorylation // protein dephosphorylation // protein dephosphorylation // protein dephosphorylation // dephosphorylation // peptidyl-tyrosine dephosphorylation // protein dephosphorylation // protein dephosphorylation // protein dephosphorylation // dephosphorylation …	not recorded // --- // inferred from electronic annotation // inferred from electronic annotation // inferred from electronic annotation // not recorded // --- // inferred from electronic annotation // inferred from electronic annotation // inferred from electronic annotation // not recorded // inferred from electronic annotation // --- // inferred from electronic annotation // inferred from elec…	---	---	---	GO:0004725 // GO:0008138 // GO:0008138 // GO:0008138 // GO:0016787 // GO:0016791 // GO:0004725 // GO:0008138 // GO:0008138 // GO:0008138 // GO:0016787 // GO:0016791 // GO:0004725 // GO:0008138 // GO:0005515 // GO:0008138 // GO:0008138 // GO:0016787 // GO:0016791 // GO:0004725 // GO:0008138 // GO:0008138 // GO:0016791 // GO:0008138 // GO:0016787 // GO:0004725 // GO:0008138 // GO:0008138 // GO:0008…	protein tyrosine phosphatase activity // protein tyrosine/serine/threonine phosphatase activity // protein tyrosine/serine/threonine phosphatase activity // protein tyrosine/serine/threonine phosphatase activity // hydrolase activity // phosphatase activity // protein tyrosine phosphatase activity // protein tyrosine/serine/threonine phosphatase activity // protein tyrosine/serine/threonine phosp…	inferred from electronic annotation // not recorded // --- // inferred from electronic annotation // inferred from electronic annotation // inferred from electronic annotation // inferred from electronic annotation // not recorded // --- // inferred from electronic annotation // inferred from electronic annotation // inferred from electronic annotation // inferred from electronic annotation // no…	---	---	Pfam // Pfam	IPR000340 // IPR000340	Dual specificity phosphatase, catalytic domain // Dual specificity phosphatase, catalytic domain	main	3.18419	2.88543	3.26313	3.13028	7.36665	5.88819
10733017	Havcr1	hepatitis A virus cellular receptor 1	0.0450478	0.49	12.62	60.04	4.7619	up	ENSRNOT00000009573 // NM_173149 // AF035963	ENSEMBL // RefSeq // GenBank	cdna:known chromosome:Rnor_5.0:10:31644784:31668180:1 gene:ENSRNOG00000007243 gene_biotype:protein_coding transcript_biotype:protein_coding // Rattus norvegicus hepatitis A virus cellular receptor 1 (Havcr1), mRNA. // Rattus norvegicus kidney injury molecule-1 (KIM-1) mRNA, complete cds.	chr10	+	31825130	31858023	GO:0006911 // GO:0007584 // GO:0010046 // GO:0033574 // GO:0042493 // GO:0046677 // GO:0006911 // GO:0007584 // GO:0010046 // GO:0033574 // GO:0042493 // GO:0046677 // GO:0006911 // GO:0007584 // GO:0010046 // GO:0033574 // GO:0042493 // GO:0046677	phagocytosis, engulfment // response to nutrient // response to mycotoxin // response to testosterone stimulus // response to drug // response to antibiotic // phagocytosis, engulfment // response to nutrient // response to mycotoxin // response to testosterone stimulus // response to drug // response to antibiotic // phagocytosis, engulfment // response to nutrient // response to mycotoxin // re…	inferred from mutant phenotype // inferred from expression pattern // inferred from expression pattern // inferred from expression pattern // inferred from expression pattern // inferred from expression pattern // inferred from mutant phenotype // inferred from expression pattern // inferred from expression pattern // inferred from expression pattern // inferred from expression pattern // inferre…	GO:0005615 // GO:0009986 // GO:0016021 // GO:0045335 // GO:0005737 // GO:0016020 // GO:0016324 // GO:0005615 // GO:0009986 // GO:0016021 // GO:0045335 // GO:0005737 // GO:0016020 // GO:0016324 // GO:0005615 // GO:0009986 // GO:0016021 // GO:0045335 // GO:0005737 // GO:0016020 // GO:0016324	extracellular space // cell surface // integral to membrane // phagocytic vesicle // cytoplasm // membrane // apical plasma membrane // extracellular space // cell surface // integral to membrane // phagocytic vesicle // cytoplasm // membrane // apical plasma membrane // extracellular space // cell surface // integral to membrane // phagocytic vesicle // cytoplasm // membrane // apical plasma mem…	inferred from direct assay // inferred from direct assay // inferred from electronic annotation // inferred from direct assay // inferred from direct assay // inferred from electronic annotation // inferred from direct assay // inferred from direct assay // inferred from direct assay // inferred from electronic annotation // inferred from direct assay // inferred from direct assay // inferred fro…	GO:0005515 // GO:0003674 // GO:0003674 // GO:0003674	protein binding // molecular_function // molecular_function // molecular_function	inferred from electronic annotation // no biological data available // no biological data available // no biological data available	---	---	Pfam	IPR013106	Immunoglobulin V-set	main	3.46802	4.23385	3.29688	5.98048	7.95137	3.84422
10863043	---	---	0.0392086	0.465	8.62	41.15	4.7619	up	ENSRNOT00000073316	ENSEMBL	cdna:known chromosome:Rnor_5.0:3:22434685:22435309:1 gene:ENSRNOG00000049909 gene_biotype:protein_coding transcript_biotype:protein_coding	chr4	-	102940850	102941176	---	---	---	---	---	---	GO:0005515	protein binding	inferred from electronic annotation	---	---	Pfam // Pfam // Pfam	IPR013098 // IPR013106 // IPR013151	Immunoglobulin I-set // Immunoglobulin V-set // Immunoglobulin	main	3.50694	2.84012	3.0028	6.99803	6.02323	3.12018
10879516	Mfsd2a	major facilitator superfamily domain containing 2A	2.7e-06	0.0148	21.11	100.8	4.7619	up	NM_001106683 // ENSRNOT00000019080 // BC161915	RefSeq // ENSEMBL // GenBank	Rattus norvegicus major facilitator superfamily domain containing 2A (Mfsd2a), mRNA. // cdna:known chromosome:Rnor_5.0:5:144433450:144448324:-1 gene:ENSRNOG00000014008 gene_biotype:protein_coding transcript_biotype:protein_coding // Rattus norvegicus major facilitator superfamily domain containing 2, mRNA (cDNA clone MGC:187650 IMAGE:8369688), complete cds.	chr5	-	142260555	142275279	GO:0055085	transmembrane transport	inferred from electronic annotation	GO:0016021	integral to membrane	inferred from electronic annotation	---	---	---	---	---	Pfam	IPR011701	Major facilitator superfamily	main	4.36788	4.19143	4.66873	6.94858	6.63503	6.43524
10906926	Rnd1	Rho family GTPase 1	0.0014085	0.191	26.2	123.98	4.7619	up	NM_001013222 // ENSRNOT00000018276 // BC089994	RefSeq // ENSEMBL // GenBank	Rattus norvegicus Rho family GTPase 1 (Rnd1), mRNA. // cdna:known chromosome:Rnor_5.0:X:114852416:114859487:-1 gene:ENSRNOG00000013621 gene_biotype:protein_coding transcript_biotype:protein_coding // Rattus norvegicus Rho family GTPase 1, mRNA (cDNA clone MGC:109441 IMAGE:7320068), complete cds.	chr7	-	137412895	137425590	GO:0007015 // GO:0007015 // GO:0007162 // GO:0007162 // GO:0007264 // GO:0016322 // GO:0016322 // GO:0007015 // GO:0007015 // GO:0007162 // GO:0007162 // GO:0007264 // GO:0016322 // GO:0016322 // GO:0007165 // GO:0006184 // GO:0015031 // GO:0007015 // GO:0007015 // GO:0007162 // GO:0007162 // GO:0007264 // GO:0016322 // GO:0016322	actin filament organization // actin filament organization // negative regulation of cell adhesion // negative regulation of cell adhesion // small GTPase mediated signal transduction // neuron remodeling // neuron remodeling // actin filament organization // actin filament organization // negative regulation of cell adhesion // negative regulation of cell adhesion // small GTPase mediated signal…	inferred from electronic annotation // not recorded // inferred from electronic annotation // not recorded // inferred from electronic annotation // inferred from electronic annotation // not recorded // inferred from electronic annotation // not recorded // inferred from electronic annotation // not recorded // inferred from electronic annotation // inferred from electronic annotation // not rec…	GO:0005622 // GO:0005912 // GO:0005912 // GO:0016020 // GO:0005622 // GO:0005912 // GO:0005912 // GO:0016020 // GO:0005622 // GO:0005912 // GO:0005912 // GO:0016020	intracellular // adherens junction // adherens junction // membrane // intracellular // adherens junction // adherens junction // membrane // intracellular // adherens junction // adherens junction // membrane	inferred from electronic annotation // inferred from electronic annotation // not recorded // inferred from electronic annotation // inferred from electronic annotation // inferred from electronic annotation // not recorded // inferred from electronic annotation // inferred from electronic annotation // inferred from electronic annotation // not recorded // inferred from electronic annotation	GO:0005102 // GO:0005102 // GO:0005525 // GO:0000166 // GO:0005102 // GO:0005102 // GO:0005525 // GO:0005515 // GO:0003924 // GO:0000166 // GO:0005102 // GO:0005102 // GO:0005525 // GO:0000166	receptor binding // receptor binding // GTP binding // nucleotide binding // receptor binding // receptor binding // GTP binding // protein binding // GTPase activity // nucleotide binding // receptor binding // receptor binding // GTP binding // nucleotide binding	inferred from electronic annotation // not recorded // inferred from electronic annotation // inferred from electronic annotation // inferred from electronic annotation // not recorded // inferred from electronic annotation // inferred from electronic annotation // inferred from electronic annotation // inferred from electronic annotation // inferred from electronic annotation // not recorded // …	---	---	Pfam // Pfam // Pfam	IPR001806 // IPR006689 // IPR013684	Small GTPase superfamily // Small GTPase superfamily, ARF/SAR type // Mitochondrial Rho-like	main	4.40355	4.84024	4.9183	6.09977	7.99782	6.81729
10907934	Mmp20	matrix metallopeptidase 20	0.0002027	0.129	14	65.44	4.7619	up	NM_001106800 // ENSRNOT00000033306	RefSeq // ENSEMBL	Rattus norvegicus matrix metallopeptidase 20 (Mmp20), mRNA. // cdna:known chromosome:Rnor_5.0:8:5836699:5877372:1 gene:ENSRNOG00000021896 gene_biotype:protein_coding transcript_biotype:protein_coding	chr8	+	4467233	4507865	GO:0006508 // GO:0097186 // GO:0097186 // GO:0006508 // GO:0097186 // GO:0097186 // GO:0008152	proteolysis // amelogenesis // amelogenesis // proteolysis // amelogenesis // amelogenesis // metabolic process	inferred from electronic annotation // inferred from electronic annotation // not recorded // inferred from electronic annotation // inferred from electronic annotation // not recorded // inferred from electronic annotation	GO:0031012 // GO:0031012	extracellular matrix // extracellular matrix	inferred from electronic annotation // inferred from electronic annotation	GO:0004222 // GO:0005509 // GO:0008270 // GO:0008233 // GO:0008237 // GO:0016787 // GO:0046872 // GO:0004222 // GO:0005509 // GO:0008270 // GO:0005515 // GO:0008237 // GO:0008233 // GO:0016787 // GO:0046872	metalloendopeptidase activity // calcium ion binding // zinc ion binding // peptidase activity // metallopeptidase activity // hydrolase activity // metal ion binding // metalloendopeptidase activity // calcium ion binding // zinc ion binding // protein binding // metallopeptidase activity // peptidase activity // hydrolase activity // metal ion binding	inferred from electronic annotation // inferred from electronic annotation // inferred from electronic annotation // inferred from electronic annotation // inferred from electronic annotation // inferred from electronic annotation // inferred from electronic annotation // inferred from electronic annotation // inferred from electronic annotation // inferred from electronic annotation // inferred …	---	---	Pfam // Pfam // Pfam	IPR001818 // IPR002477 // IPR018487	Peptidase M10, metallopeptidase // Peptidoglycan binding-like // Hemopexin-like repeats	main	3.67244	3.72363	4.05286	6.816	5.85416	5.47882
10725289	Gp2	glycoprotein 2 (zymogen granule membrane)	0.0445174	0.488	37.25	170.78	4.54545	up	NM_134418 // ENSRNOT00000021249 // M58716	RefSeq // ENSEMBL // GenBank	Rattus norvegicus glycoprotein 2 (zymogen granule membrane) (Gp2), mRNA. // cdna:known chromosome:Rnor_5.0:1:196108659:196124218:-1 gene:ENSRNOG00000015716 gene_biotype:protein_coding transcript_biotype:protein_coding // R.norvegicus zymogen granule membrane protein GP-2 mRNA, complete cds.	chr1	-	177709931	177725490	GO:0002412 // GO:0002412 // GO:0002412 // GO:0002412 // GO:0002412 // GO:0002412	antigen transcytosis by M cells in mucosal-associated lymphoid tissue // antigen transcytosis by M cells in mucosal-associated lymphoid tissue // antigen transcytosis by M cells in mucosal-associated lymphoid tissue // antigen transcytosis by M cells in mucosal-associated lymphoid tissue // antigen transcytosis by M cells in mucosal-associated lymphoid tissue // antigen transcytosis by M cells in…	inferred from electronic annotation // not recorded // inferred from electronic annotation // not recorded // inferred from electronic annotation // not recorded	GO:0005576 // GO:0005886 // GO:0016324 // GO:0016324 // GO:0031225 // GO:0016020 // GO:0005576 // GO:0005886 // GO:0016324 // GO:0016324 // GO:0031225 // GO:0016020 // GO:0005576 // GO:0005886 // GO:0016324 // GO:0016324 // GO:0031225 // GO:0016020	extracellular region // plasma membrane // apical plasma membrane // apical plasma membrane // anchored to membrane // membrane // extracellular region // plasma membrane // apical plasma membrane // apical plasma membrane // anchored to membrane // membrane // extracellular region // plasma membrane // apical plasma membrane // apical plasma membrane // anchored to membrane // membrane	inferred from electronic annotation // inferred from electronic annotation // inferred from electronic annotation // not recorded // inferred from electronic annotation // inferred from electronic annotation // inferred from electronic annotation // inferred from electronic annotation // inferred from electronic annotation // not recorded // inferred from electronic annotation // inferred from el…	GO:0003823 // GO:0003823 // GO:0003823 // GO:0003823 // GO:0003823 // GO:0003823	antigen binding // antigen binding // antigen binding // antigen binding // antigen binding // antigen binding	inferred from electronic annotation // not recorded // inferred from electronic annotation // not recorded // inferred from electronic annotation // not recorded	---	---	Pfam	IPR001507	Zona pellucida domain	main	4.65441	5.34631	5.68389	9.01573	8.1031	5.18192
10844339	Slc25a25	solute carrier family 25 (mitochondrial carrier, phosphate carrier), member 25	0.0047608	0.256	114.07	489.98	4.34783	up	NM_145677 // ENSRNOT00000020206 // AY043169	RefSeq // ENSEMBL // GenBank	Rattus norvegicus solute carrier family 25 (mitochondrial carrier, phosphate carrier), member 25 (Slc25a25), nuclear gene encoding mitochondrial protein, mRNA. // cdna:known chromosome:Rnor_5.0:3:16791267:16801399:-1 gene:ENSRNOG00000014338 gene_biotype:protein_coding transcript_biotype:protein_coding // Rattus norvegicus peroxisomal Ca-dependent solute carrier-like protein (Pcscl) mRNA, complete…	chr3	-	11539413	11556195	GO:0055085 // GO:0006810 // GO:0055085 // GO:0006810 // GO:0055085 // GO:0006810	transmembrane transport // transport // transmembrane transport // transport // transmembrane transport // transport	inferred from electronic annotation // inferred from electronic annotation // inferred from electronic annotation // inferred from electronic annotation // inferred from electronic annotation // inferred from electronic annotation	GO:0005739 // GO:0005743 // GO:0016021 // GO:0005739 // GO:0016020 // GO:0005739 // GO:0005743 // GO:0016021 // GO:0005739 // GO:0016020 // GO:0005739 // GO:0005743 // GO:0016021 // GO:0005739 // GO:0016020	mitochondrion // mitochondrial inner membrane // integral to membrane // mitochondrion // membrane // mitochondrion // mitochondrial inner membrane // integral to membrane // mitochondrion // membrane // mitochondrion // mitochondrial inner membrane // integral to membrane // mitochondrion // membrane	not recorded // inferred from electronic annotation // inferred from electronic annotation // inferred from electronic annotation // inferred from electronic annotation // not recorded // inferred from electronic annotation // inferred from electronic annotation // inferred from electronic annotation // inferred from electronic annotation // not recorded // inferred from electronic annotation // …	GO:0005509 // GO:0046872 // GO:0005509 // GO:0046872 // GO:0005509 // GO:0046872	calcium ion binding // metal ion binding // calcium ion binding // metal ion binding // calcium ion binding // metal ion binding	inferred from electronic annotation // inferred from electronic annotation // inferred from electronic annotation // inferred from electronic annotation // inferred from electronic annotation // inferred from electronic annotation	---	---	Pfam	IPR018108	Mitochondrial substrate/solute carrier	main	5.54861	7.89521	7.08507	8.93687	8.94172	8.98403
10912425	Clstn2	calsyntenin 2	2.7e-06	0.0148	27.02	119.9	4.34783	up	NM_134377 // ENSRNOT00000066731	RefSeq // ENSEMBL	Rattus norvegicus calsyntenin 2 (Clstn2), mRNA. // cdna:known chromosome:Rnor_5.0:8:104768408:105478061:-1 gene:ENSRNOG00000043085 gene_biotype:protein_coding transcript_biotype:protein_coding	chr8	+	102328707	102338366	GO:0007156 // GO:0007268 // GO:0007155 // GO:0007156 // GO:0007268 // GO:0007155	homophilic cell adhesion // synaptic transmission // cell adhesion // homophilic cell adhesion // synaptic transmission // cell adhesion	inferred from electronic annotation // non-traceable author statement // inferred from electronic annotation // inferred from electronic annotation // non-traceable author statement // inferred from electronic annotation	GO:0000139 // GO:0005789 // GO:0005886 // GO:0016021 // GO:0045211 // GO:0045211 // GO:0005783 // GO:0005794 // GO:0016020 // GO:0000139 // GO:0005789 // GO:0005886 // GO:0016021 // GO:0045211 // GO:0045211 // GO:0016020 // GO:0045211 // GO:0005783 // GO:0005794	Golgi membrane // endoplasmic reticulum membrane // plasma membrane // integral to membrane // postsynaptic membrane // postsynaptic membrane // endoplasmic reticulum // Golgi apparatus // membrane // Golgi membrane // endoplasmic reticulum membrane // plasma membrane // integral to membrane // postsynaptic membrane // postsynaptic membrane // membrane // postsynaptic membrane // endoplasmic reti…	inferred from electronic annotation // inferred from electronic annotation // inferred from electronic annotation // inferred from electronic annotation // inferred from direct assay // not recorded // inferred from electronic annotation // inferred from electronic annotation // inferred from electronic annotation // inferred from electronic annotation // inferred from electronic annotation // in…	GO:0005509 // GO:0005509	calcium ion binding // calcium ion binding	inferred from electronic annotation // inferred from electronic annotation	---	---	Pfam	IPR002126	Cadherin	main	5.11101	4.6459	4.53862	6.94291	6.93779	6.88937
10923338	Coq10b	coenzyme Q10 homolog B (S. cerevisiae)	0.0001113	0.1	266.13	1164.41	4.34783	up	NM_001009671 // ENSRNOT00000040461 // BC088273	RefSeq // ENSEMBL // GenBank	Rattus norvegicus coenzyme Q10 homolog B (S. cerevisiae) (Coq10b), nuclear gene encoding mitochondrial protein, mRNA. // cdna:known chromosome:Rnor_5.0:9:61337179:61357089:1 gene:ENSRNOG00000014456 gene_biotype:protein_coding transcript_biotype:protein_coding // Rattus norvegicus coenzyme Q10 homolog B (S. cerevisiae), mRNA (cDNA clone MGC:109115 IMAGE:7380093), complete cds.	chr9	+	53858750	53878664	---	---	---	GO:0005739 // GO:0005743 // GO:0005739 // GO:0016020 // GO:0005739 // GO:0005743 // GO:0005739 // GO:0016020 // GO:0005739 // GO:0005743 // GO:0005739 // GO:0016020	mitochondrion // mitochondrial inner membrane // mitochondrion // membrane // mitochondrion // mitochondrial inner membrane // mitochondrion // membrane // mitochondrion // mitochondrial inner membrane // mitochondrion // membrane	not recorded // inferred from electronic annotation // inferred from electronic annotation // inferred from electronic annotation // not recorded // inferred from electronic annotation // inferred from electronic annotation // inferred from electronic annotation // not recorded // inferred from electronic annotation // inferred from electronic annotation // inferred from electronic annotation	---	---	---	---	---	Pfam	IPR005031	Streptomyces cyclase/dehydrase	main	8.11327	8.61537	7.46694	10.199	10.0289	10.3812
10729635	Gldc	glycine dehydrogenase (decarboxylating)	0.0051451	0.262	138.34	567.99	4.16667	up	NM_001107583 // ENSRNOT00000067612 // FQ209556	RefSeq // ENSEMBL // GenBank	Rattus norvegicus glycine dehydrogenase (decarboxylating) (Gldc), nuclear gene encoding mitochondrial protein, mRNA. // cdna:known chromosome:Rnor_5.0:1:255544864:255624575:-1 gene:ENSRNOG00000011599 gene_biotype:protein_coding transcript_biotype:protein_coding // Rattus norvegicus TL0ABA41YO06 mRNA sequence.	chr1	-	233847214	233925560	GO:0019464 // GO:0006520 // GO:0006546 // GO:0055114 // GO:0019464 // GO:0055114 // GO:0006520 // GO:0006546 // GO:0019464	glycine decarboxylation via glycine cleavage system // cellular amino acid metabolic process // glycine catabolic process // oxidation-reduction process // glycine decarboxylation via glycine cleavage system // oxidation-reduction process // cellular amino acid metabolic process // glycine catabolic process // glycine decarboxylation via glycine cleavage system	inferred from direct assay // inferred from electronic annotation // inferred from electronic annotation // inferred from electronic annotation // inferred from direct assay // inferred from electronic annotation // inferred from electronic annotation // inferred from electronic annotation // inferred from direct assay	GO:0005739 // GO:0005739 // GO:0005960 // GO:0005739 // GO:0005739 // GO:0005960 // GO:0005739 // GO:0005739 // GO:0005960	mitochondrion // mitochondrion // glycine cleavage complex // mitochondrion // mitochondrion // glycine cleavage complex // mitochondrion // mitochondrion // glycine cleavage complex	inferred from direct assay // not recorded // inferred from direct assay // inferred from direct assay // not recorded // inferred from direct assay // inferred from direct assay // not recorded // inferred from direct assay	GO:0004375 // GO:0016594 // GO:0016829 // GO:0019899 // GO:0030170 // GO:0046983 // GO:0003824 // GO:0004375 // GO:0030170 // GO:0004375 // GO:0016594 // GO:0016829 // GO:0019899 // GO:0030170 // GO:0046983 // GO:0003824 // GO:0004375 // GO:0030170 // GO:0004375 // GO:0016594 // GO:0016829 // GO:0019899 // GO:0030170 // GO:0046983	glycine dehydrogenase (decarboxylating) activity // glycine binding // lyase activity // enzyme binding // pyridoxal phosphate binding // protein dimerization activity // catalytic activity // glycine dehydrogenase (decarboxylating) activity // pyridoxal phosphate binding // glycine dehydrogenase (decarboxylating) activity // glycine binding // lyase activity // enzyme binding // pyridoxal phosph…	inferred from direct assay // inferred from direct assay // inferred from electronic annotation // inferred from physical interaction // inferred from direct assay // inferred from direct assay // inferred from electronic annotation // inferred from electronic annotation // inferred from electronic annotation // inferred from direct assay // inferred from direct assay // inferred from electronic …	---	---	Pfam // Pfam	IPR001597 // IPR020580	Aromatic amino acid beta-eliminating lyase/threonine aldolase // Glycine cleavage system P-protein, N-terminal	main	8.22168	6.8462	6.29586	9.8488	8.84236	8.81086
10870110	Angptl3	angiopoietin-like 3	0.0219072	0.401	37.78	157.74	4.16667	up	NM_001025065 // ENSRNOT00000011486 // FQ210243	RefSeq // ENSEMBL // GenBank	Rattus norvegicus angiopoietin-like 3 (Angptl3), mRNA. // cdna:known chromosome:Rnor_5.0:5:121639582:121644267:1 gene:ENSRNOG00000008638 gene_biotype:protein_coding transcript_biotype:protein_coding // Rattus norvegicus TL0ABA31YL18 mRNA sequence.	chr5	+	119479669	119486509	GO:0006071 // GO:0006071 // GO:0006631 // GO:0006631 // GO:0006644 // GO:0007160 // GO:0007160 // GO:0007165 // GO:0007165 // GO:0008203 // GO:0008203 // GO:0009395 // GO:0009395 // GO:0009725 // GO:0010519 // GO:0010519 // GO:0019915 // GO:0019915 // GO:0030335 // GO:0030335 // GO:0042632 // GO:0042632 // GO:0043086 // GO:0045766 // GO:0045766 // GO:0048844 // GO:0048844 // GO:0050996 // GO:0050…	glycerol metabolic process // glycerol metabolic process // fatty acid metabolic process // fatty acid metabolic process // phospholipid metabolic process // cell-matrix adhesion // cell-matrix adhesion // signal transduction // signal transduction // cholesterol metabolic process // cholesterol metabolic process // phospholipid catabolic process // phospholipid catabolic process // response to h…	inferred from electronic annotation // not recorded // inferred from electronic annotation // not recorded // not recorded // inferred from electronic annotation // not recorded // inferred from electronic annotation // not recorded // inferred from electronic annotation // not recorded // inferred from electronic annotation // not recorded // inferred from expression pattern // inferred from ele…	GO:0005615 // GO:0005615 // GO:0005575 // GO:0009986 // GO:0005615 // GO:0005615 // GO:0005575 // GO:0009986 // GO:0005615 // GO:0005615 // GO:0005575 // GO:0009986	extracellular space // extracellular space // cellular_component // cell surface // extracellular space // extracellular space // cellular_component // cell surface // extracellular space // extracellular space // cellular_component // cell surface	inferred from electronic annotation // not recorded // no biological data available // inferred from electronic annotation // inferred from electronic annotation // not recorded // no biological data available // inferred from electronic annotation // inferred from electronic annotation // not recorded // no biological data available // inferred from electronic annotation	GO:0004857 // GO:0004859 // GO:0004859 // GO:0005178 // GO:0005178 // GO:0008083 // GO:0008083 // GO:0003674 // GO:0004857 // GO:0004857 // GO:0004859 // GO:0004859 // GO:0005178 // GO:0005178 // GO:0008083 // GO:0008083 // GO:0003674 // GO:0005102 // GO:0004857 // GO:0043498 // GO:0004857 // GO:0004859 // GO:0004859 // GO:0005178 // GO:0005178 // GO:0008083 // GO:0008083 // GO:0003674 // GO:0004…	enzyme inhibitor activity // phospholipase inhibitor activity // phospholipase inhibitor activity // integrin binding // integrin binding // growth factor activity // growth factor activity // molecular_function // enzyme inhibitor activity // enzyme inhibitor activity // phospholipase inhibitor activity // phospholipase inhibitor activity // integrin binding // integrin binding // growth factor …	not recorded // inferred from electronic annotation // not recorded // inferred from electronic annotation // not recorded // inferred from electronic annotation // not recorded // no biological data available // inferred from electronic annotation // not recorded // inferred from electronic annotation // not recorded // inferred from electronic annotation // not recorded // inferred from electro…	---	---	Pfam	IPR002181	Fibrinogen, alpha/beta/gamma chain, C-terminal globular domain	main	6.79986	5.26224	3.68418	7.02176	7.20448	7.73076
10714106	Fam111a	family with sequence similarity 111, member A	4.8e-06	0.0219	16.9	68	4	up	NM_001109163 // ENSRNOT00000016152 // GENSCAN00000009140	RefSeq // ENSEMBL // ENSEMBL	Rattus norvegicus family with sequence similarity 111, member A (Fam111a), mRNA. // cdna:known chromosome:Rnor_5.0:1:236163691:236179257:1 gene:ENSRNOG00000012067 gene_biotype:protein_coding transcript_biotype:protein_coding // cdna:genscan chromosome:Rnor_5.0:1:236173311:236178077:1 transcript_biotype:protein_coding	chr1	+	215590616	215596413	GO:0000087 // GO:0045071 // GO:0008152 // GO:0000087 // GO:0045071 // GO:0008152	M phase of mitotic cell cycle // negative regulation of viral genome replication // metabolic process // M phase of mitotic cell cycle // negative regulation of viral genome replication // metabolic process	not recorded // not recorded // inferred from electronic annotation // not recorded // not recorded // inferred from electronic annotation	GO:0005634 // GO:0005737 // GO:0005634 // GO:0005737	nucleus // cytoplasm // nucleus // cytoplasm	not recorded // not recorded // not recorded // not recorded	GO:0003824 // GO:0003824	catalytic activity // catalytic activity	inferred from electronic annotation // inferred from electronic annotation	---	---	---	---	---	main	4.03786	4.35785	3.86984	6.15075	5.87049	6.29381
10863028	LOC100366057	---	0.0091253	0.319	88.82	358.23	4	up	ENSRNOT00000074650 // FQ231665 // X75533 // BC098746 // L17078 // FQ226818	ENSEMBL // GenBank // GenBank // GenBank // GenBank // GenBank	cdna:known chromosome:Rnor_5.0:3:23144141:23144637:1 gene:ENSRNOG00000049284 gene_biotype:protein_coding transcript_biotype:protein_coding // Rattus norvegicus TL0AEA68YK12 mRNA sequence. // R.norvegicus mRNA for V kappa 21/61. // Rattus norvegicus similar to NGF-binding Ig light chain, mRNA (cDNA clone MGC:112745 IMAGE:7388228), complete cds. // Rattus norvegicus NGF-binding Ig rearranged L-chai…	chr4	-	102453447	102453878	---	---	---	---	---	---	GO:0005515	protein binding	inferred from electronic annotation	---	---	Pfam // Pfam	IPR013098 // IPR013106	Immunoglobulin I-set // Immunoglobulin V-set	main	7.03293	6.06716	6.34574	7.40875	8.3163	9.78203
10773361	Sorcs2	sortilin-related VPS10 domain containing receptor 2	5.21e-05	0.0678	30.5	116.72	3.84615	up	NM_001107225 // ENSRNOT00000009960	RefSeq // ENSEMBL	Rattus norvegicus sortilin-related VPS10 domain containing receptor 2 (Sorcs2), mRNA. // cdna:known chromosome:Rnor_5.0:14:79176694:79547823:1 gene:ENSRNOG00000007033 gene_biotype:protein_coding transcript_biotype:protein_coding	chr14	+	79968166	80342190	GO:0008150	biological_process	no biological data available	GO:0016021 // GO:0016021 // GO:0005575 // GO:0016020	integral to membrane // integral to membrane // cellular_component // membrane	inferred from electronic annotation // inferred from electronic annotation // no biological data available // inferred from electronic annotation	GO:0003674	molecular_function	no biological data available	---	---	Pfam	IPR000601	PKD domain	main	4.85263	4.95684	5.01044	7.16244	7.14998	6.34102
10785943	Slc15a1	solute carrier family 15 (oligopeptide transporter), member 1	0.0369824	0.456	88.4	338.21	3.84615	up	ENSRNOT00000015890 // NM_057121 // NM_001079838 // D50306	ENSEMBL // RefSeq // RefSeq // GenBank	cdna:known chromosome:Rnor_5.0:15:110194618:110238806:-1 gene:ENSRNOG00000011598 gene_biotype:protein_coding transcript_biotype:protein_coding // Rattus norvegicus solute carrier family 15 (oligopeptide transporter), member 1 (Slc15a1), transcript variant 1, mRNA. // Rattus norvegicus solute carrier family 15 (oligopeptide transporter), member 1 (Slc15a1), transcript variant 2, mRNA. // Rattus no…	chr15	-	106550096	106592594	GO:0006857 // GO:0015031 // GO:0035672 // GO:0051956 // GO:0006810 // GO:0006857 // GO:0015833 // GO:0006857 // GO:0015031 // GO:0035672 // GO:0051956 // GO:0006810 // GO:0006857 // GO:0015833 // GO:0006857 // GO:0015031 // GO:0035672 // GO:0051956 // GO:0006810 // GO:0006857 // GO:0015833 // GO:0006857 // GO:0015031 // GO:0035672 // GO:0051956 // GO:0006810 // GO:0006857 // GO:0015833	oligopeptide transport // protein transport // oligopeptide transmembrane transport // negative regulation of amino acid transport // transport // oligopeptide transport // peptide transport // oligopeptide transport // protein transport // oligopeptide transmembrane transport // negative regulation of amino acid transport // transport // oligopeptide transport // peptide transport // oligopeptid…	not recorded // inferred from electronic annotation // not recorded // inferred from direct assay // inferred from electronic annotation // inferred from electronic annotation // inferred from electronic annotation // not recorded // inferred from electronic annotation // not recorded // inferred from direct assay // inferred from electronic annotation // inferred from electronic annotation // in…	GO:0016020 // GO:0016021 // GO:0016021 // GO:0016020 // GO:0016020 // GO:0016021 // GO:0016021 // GO:0016020 // GO:0016020 // GO:0016021 // GO:0016021 // GO:0016020 // GO:0016020 // GO:0016021 // GO:0016021 // GO:0016020	membrane // integral to membrane // integral to membrane // membrane // membrane // integral to membrane // integral to membrane // membrane // membrane // integral to membrane // integral to membrane // membrane // membrane // integral to membrane // integral to membrane // membrane	inferred from direct assay // inferred from electronic annotation // not recorded // inferred from electronic annotation // inferred from direct assay // inferred from electronic annotation // not recorded // inferred from electronic annotation // inferred from direct assay // inferred from electronic annotation // not recorded // inferred from electronic annotation // inferred from direct assay …	GO:0005427 // GO:0005427 // GO:0015198 // GO:0015293 // GO:0016248 // GO:0005215 // GO:0005427 // GO:0005427 // GO:0015198 // GO:0015293 // GO:0016248 // GO:0005215 // GO:0005427 // GO:0005427 // GO:0015198 // GO:0015293 // GO:0016248 // GO:0005215 // GO:0005427 // GO:0005427 // GO:0015198 // GO:0015293 // GO:0016248 // GO:0005215	proton-dependent oligopeptide secondary active transmembrane transporter activity // proton-dependent oligopeptide secondary active transmembrane transporter activity // oligopeptide transporter activity // symporter activity // channel inhibitor activity // transporter activity // proton-dependent oligopeptide secondary active transmembrane transporter activity // proton-dependent oligopeptide s…	inferred from electronic annotation // not recorded // inferred from electronic annotation // inferred from electronic annotation // inferred from direct assay // inferred from electronic annotation // inferred from electronic annotation // not recorded // inferred from electronic annotation // inferred from electronic annotation // inferred from direct assay // inferred from electronic annotatio…	---	---	Pfam	IPR000109	Proton-dependent oligopeptide transporter family	main	8.11811	6.49238	4.81496	8.69911	7.86492	8.6942
10824695	S100a9	S100 calcium binding protein A9	0.0299216	0.435	33.84	132.05	3.84615	up	ENSRNOT00000015351 // NM_053587 // L18948	ENSEMBL // RefSeq // GenBank	cdna:known chromosome:Rnor_5.0:2:209531412:209533744:-1 gene:ENSRNOG00000011483 gene_biotype:protein_coding transcript_biotype:protein_coding // Rattus norvegicus S100 calcium binding protein A9 (S100a9), mRNA. // Rattus norvegicus intracellular calcium-binding protein (MRP14) mRNA, complete cds.	chr2	-	182985466	182988147	GO:0002523 // GO:0002523 // GO:0002544 // GO:0006914 // GO:0006914 // GO:0006917 // GO:0006917 // GO:0006919 // GO:0006919 // GO:0010043 // GO:0030593 // GO:0030593 // GO:0030595 // GO:0031532 // GO:0031532 // GO:0032496 // GO:0045087 // GO:0045113 // GO:0045113 // GO:0045471 // GO:0050729 // GO:0050729 // GO:0070488 // GO:0070488 // GO:0002523 // GO:0006914 // GO:0006917 // GO:0006919 // GO:0030…	leukocyte migration involved in inflammatory response // leukocyte migration involved in inflammatory response // chronic inflammatory response // autophagy // autophagy // induction of apoptosis // induction of apoptosis // activation of cysteine-type endopeptidase activity involved in apoptotic process // activation of cysteine-type endopeptidase activity involved in apoptotic process // respon…	not recorded // inferred from sequence or structural similarity // inferred from expression pattern // not recorded // inferred from sequence or structural similarity // not recorded // inferred from sequence or structural similarity // not recorded // inferred from sequence or structural similarity // inferred from expression pattern // not recorded // inferred from sequence or structural simila…	GO:0005615 // GO:0005634 // GO:0005634 // GO:0005730 // GO:0005737 // GO:0005737 // GO:0005856 // GO:0005886 // GO:0005576 // GO:0016020 // GO:0005615 // GO:0005634 // GO:0005634 // GO:0005730 // GO:0005737 // GO:0005737 // GO:0005856 // GO:0005886 // GO:0005576 // GO:0016020 // GO:0005615 // GO:0005634 // GO:0005634 // GO:0005730 // GO:0005737 // GO:0005737 // GO:0005856 // GO:0005886 // GO:0005…	extracellular space // nucleus // nucleus // nucleolus // cytoplasm // cytoplasm // cytoskeleton // plasma membrane // extracellular region // membrane // extracellular space // nucleus // nucleus // nucleolus // cytoplasm // cytoplasm // cytoskeleton // plasma membrane // extracellular region // membrane // extracellular space // nucleus // nucleus // nucleolus // cytoplasm // cytoplasm // cytos…	inferred from direct assay // inferred from electronic annotation // not recorded // not recorded // inferred from electronic annotation // not recorded // inferred from electronic annotation // inferred from electronic annotation // inferred from electronic annotation // inferred from electronic annotation // inferred from direct assay // inferred from electronic annotation // not recorded // no…	GO:0005509 // GO:0016209 // GO:0005515 // GO:0003674 // GO:0046872 // GO:0005509 // GO:0016209 // GO:0003674 // GO:0046872 // GO:0005509 // GO:0016209 // GO:0003674 // GO:0046872	calcium ion binding // antioxidant activity // protein binding // molecular_function // metal ion binding // calcium ion binding // antioxidant activity // molecular_function // metal ion binding // calcium ion binding // antioxidant activity // molecular_function // metal ion binding	inferred from electronic annotation // inferred from electronic annotation // inferred from electronic annotation // no biological data available // inferred from electronic annotation // inferred from electronic annotation // inferred from electronic annotation // no biological data available // inferred from electronic annotation // inferred from electronic annotation // inferred from electroni…	---	---	Pfam	IPR013787	S100/CaBP-9k-type, calcium binding, subdomain	main	5.65418	5.03252	4.58338	5.37628	8.44934	7.36205
10859799	Il6	interleukin 6	0.0006046	0.157	8.23	31.76	3.84615	up	NM_012589 // ENSRNOT00000013732 // M26744	RefSeq // ENSEMBL // GenBank	Rattus norvegicus interleukin 6 (Il6), mRNA. // cdna:known chromosome:Rnor_5.0:4:3095536:3100112:1 gene:ENSRNOG00000010278 gene_biotype:protein_coding transcript_biotype:protein_coding // Rattus norvegicus interleukin 6 (IL6) mRNA, complete cds.	chr4	-	456799	461376	GO:0001781 // GO:0001781 // GO:0001878 // GO:0002384 // GO:0002675 // GO:0002675 // GO:0006469 // GO:0006953 // GO:0006954 // GO:0006955 // GO:0007568 // GO:0008284 // GO:0008285 // GO:0008360 // GO:0009408 // GO:0009409 // GO:0009611 // GO:0009611 // GO:0009612 // GO:0009617 // GO:0010574 // GO:0010574 // GO:0010628 // GO:0014070 // GO:0016049 // GO:0019221 // GO:0031000 // GO:0031018 // GO:0031…	neutrophil apoptotic process // neutrophil apoptotic process // response to yeast // hepatic immune response // positive regulation of acute inflammatory response // positive regulation of acute inflammatory response // negative regulation of protein kinase activity // acute-phase response // inflammatory response // immune response // aging // positive regulation of cell proliferation // negativ…	inferred from electronic annotation // not recorded // inferred from expression pattern // not recorded // inferred from electronic annotation // not recorded // inferred from direct assay // inferred from electronic annotation // not recorded // inferred from electronic annotation // inferred from expression pattern // not recorded // inferred from mutant phenotype // inferred from direct assay …	GO:0005615 // GO:0005615 // GO:0005896 // GO:0005896 // GO:0009897 // GO:0009897 // GO:0005576 // GO:0005615 // GO:0005615 // GO:0005615 // GO:0005896 // GO:0005896 // GO:0009897 // GO:0009897 // GO:0005576 // GO:0005615 // GO:0005615 // GO:0005615 // GO:0005896 // GO:0005896 // GO:0009897 // GO:0009897 // GO:0005576 // GO:0005615	extracellular space // extracellular space // interleukin-6 receptor complex // interleukin-6 receptor complex // external side of plasma membrane // external side of plasma membrane // extracellular region // extracellular space // extracellular space // extracellular space // interleukin-6 receptor complex // interleukin-6 receptor complex // external side of plasma membrane // external side of…	inferred from direct assay // not recorded // inferred from electronic annotation // not recorded // inferred from electronic annotation // not recorded // inferred from electronic annotation // inferred from electronic annotation // inferred from direct assay // not recorded // inferred from electronic annotation // not recorded // inferred from electronic annotation // not recorded // inferred …	GO:0005102 // GO:0005125 // GO:0005125 // GO:0005138 // GO:0005138 // GO:0008083 // GO:0008083 // GO:0005125 // GO:0005138 // GO:0005102 // GO:0005125 // GO:0005125 // GO:0005138 // GO:0005138 // GO:0008083 // GO:0008083 // GO:0005515 // GO:0005125 // GO:0005138 // GO:0005102 // GO:0005125 // GO:0005125 // GO:0005138 // GO:0005138 // GO:0008083 // GO:0008083 // GO:0005125 // GO:0005138	receptor binding // cytokine activity // cytokine activity // interleukin-6 receptor binding // interleukin-6 receptor binding // growth factor activity // growth factor activity // cytokine activity // interleukin-6 receptor binding // receptor binding // cytokine activity // cytokine activity // interleukin-6 receptor binding // interleukin-6 receptor binding // growth factor activity // growth…	inferred from direct assay // inferred from direct assay // not recorded // inferred from direct assay // not recorded // inferred from electronic annotation // not recorded // inferred from electronic annotation // inferred from electronic annotation // inferred from direct assay // inferred from direct assay // not recorded // inferred from direct assay // not recorded // inferred from electron…	GenMAPP // GenMAPP // GenMAPP // GenMAPP // GenMAPP // GenMAPP	Inflammatory_Response_Pathway // Smooth_muscle_contraction // Inflammatory_Response_Pathway // Smooth_muscle_contraction // Inflammatory_Response_Pathway // Smooth_muscle_contraction	Pfam	IPR003573	Interleukin-6/G-CSF/MGF	main	3.02293	3.10196	3.02293	4.28833	5.75369	4.97783
10736697	Ccl2	chemokine (C-C motif) ligand 2	0.0022308	0.199	223.63	819.44	3.7037	up	NM_031530 // ENSRNOT00000009448 // AF058786	RefSeq // ENSEMBL // GenBank	Rattus norvegicus chemokine (C-C motif) ligand 2 (Ccl2), mRNA. // cdna:known chromosome:Rnor_5.0:10:69047091:69048889:1 gene:ENSRNOG00000007159 gene_biotype:protein_coding transcript_biotype:protein_coding // Rattus norvegicus JE/MCP-1 mRNA, complete cds.	chr10	+	70256263	70258061	GO:0000165 // GO:0000165 // GO:0001666 // GO:0001938 // GO:0002548 // GO:0002548 // GO:0006874 // GO:0006954 // GO:0006954 // GO:0007010 // GO:0007010 // GO:0007179 // GO:0007568 // GO:0008360 // GO:0008360 // GO:0009408 // GO:0009611 // GO:0009612 // GO:0009617 // GO:0010332 // GO:0010574 // GO:0010574 // GO:0010759 // GO:0010759 // GO:0014823 // GO:0016525 // GO:0016525 // GO:0019221 // GO:0019…	MAPK cascade // MAPK cascade // response to hypoxia // positive regulation of endothelial cell proliferation // monocyte chemotaxis // monocyte chemotaxis // cellular calcium ion homeostasis // inflammatory response // inflammatory response // cytoskeleton organization // cytoskeleton organization // transforming growth factor beta receptor signaling pathway // aging // regulation of cell shape /…	inferred from electronic annotation // not recorded // inferred from expression pattern // inferred from mutant phenotype // inferred from electronic annotation // not recorded // inferred from direct assay // inferred from expression pattern // not recorded // inferred from electronic annotation // not recorded // inferred from mutant phenotype // inferred from expression pattern // inferred fro…	GO:0005576 // GO:0005615 // GO:0005615 // GO:0005737 // GO:0043025 // GO:0005576 // GO:0005615 // GO:0005576 // GO:0005615 // GO:0005615 // GO:0005737 // GO:0043025 // GO:0005576 // GO:0005615 // GO:0005576 // GO:0005615 // GO:0005615 // GO:0005737 // GO:0043025 // GO:0005576 // GO:0005615	extracellular region // extracellular space // extracellular space // cytoplasm // neuronal cell body // extracellular region // extracellular space // extracellular region // extracellular space // extracellular space // cytoplasm // neuronal cell body // extracellular region // extracellular space // extracellular region // extracellular space // extracellular space // cytoplasm // neuronal cel…	not recorded // inferred from direct assay // not recorded // inferred from direct assay // inferred from direct assay // inferred from electronic annotation // inferred from electronic annotation // not recorded // inferred from direct assay // not recorded // inferred from direct assay // inferred from direct assay // inferred from electronic annotation // inferred from electronic annotation //…	GO:0001664 // GO:0008009 // GO:0008009 // GO:0008009 // GO:0008201 // GO:0031727 // GO:0031727 // GO:0001664 // GO:0005125 // GO:0008009 // GO:0031727 // GO:0001664 // GO:0008009 // GO:0008009 // GO:0008009 // GO:0008201 // GO:0031727 // GO:0031727 // GO:0005515 // GO:0001664 // GO:0031727 // GO:0005125 // GO:0008009 // GO:0001664 // GO:0008009 // GO:0008009 // GO:0008009 // GO:0008201 // GO:0031…	G-protein coupled receptor binding // chemokine activity // chemokine activity // chemokine activity // heparin binding // CCR2 chemokine receptor binding // CCR2 chemokine receptor binding // G-protein coupled receptor binding // cytokine activity // chemokine activity // CCR2 chemokine receptor binding // G-protein coupled receptor binding // chemokine activity // chemokine activity // chemokin…	not recorded // inferred from direct assay // non-traceable author statement // traceable author statement // inferred from physical interaction // inferred from mutant phenotype // not recorded // inferred from electronic annotation // inferred from electronic annotation // inferred from electronic annotation // inferred from electronic annotation // not recorded // inferred from direct assay //…	---	---	Pfam	IPR001811	Chemokine interleukin-8-like domain	main	7.78271	8.50657	7.15326	9.57733	10.3194	9.19164
10761047	Serpine1	serpin peptidase inhibitor, clade E (nexin, plasminogen activator inhibitor type 1), member 1	0.0039547	0.25	72.92	274.41	3.7037	up	ENSRNOT00000001916 // NM_012620 // M24067	ENSEMBL // RefSeq // GenBank	cdna:known chromosome:Rnor_5.0:12:24653385:24663763:1 gene:ENSRNOG00000001414 gene_biotype:protein_coding transcript_biotype:protein_coding // Rattus norvegicus serpin peptidase inhibitor, clade E (nexin, plasminogen activator inhibitor type 1), member 1 (Serpine1), mRNA. // Rattus norvegicus plasminogen activator inhibitor 1 (PAI-1) mRNA, complete cds.	chr12	-	20931996	20942374	GO:0000302 // GO:0001300 // GO:0001300 // GO:0001525 // GO:0001525 // GO:0010469 // GO:0010469 // GO:0010757 // GO:0010757 // GO:0010951 // GO:0010951 // GO:0014912 // GO:0014912 // GO:0030162 // GO:0030194 // GO:0030336 // GO:0032757 // GO:0032757 // GO:0033629 // GO:0033629 // GO:0034097 // GO:0035491 // GO:0035491 // GO:0042060 // GO:0042127 // GO:0042127 // GO:0042246 // GO:0042593 // GO:0043…	response to reactive oxygen species // chronological cell aging // chronological cell aging // angiogenesis // angiogenesis // regulation of receptor activity // regulation of receptor activity // negative regulation of plasminogen activation // negative regulation of plasminogen activation // negative regulation of endopeptidase activity // negative regulation of endopeptidase activity // negati…	inferred from expression pattern // inferred from electronic annotation // not recorded // inferred from electronic annotation // not recorded // inferred from electronic annotation // not recorded // inferred from electronic annotation // not recorded // not recorded // inferred by curator // inferred from electronic annotation // not recorded // not recorded // not recorded // not recorded // i…	GO:0005576 // GO:0005615 // GO:0005615 // GO:0005615 // GO:0031012 // GO:0031012 // GO:0031012 // GO:0005576 // GO:0005576 // GO:0005615 // GO:0005615 // GO:0005615 // GO:0031012 // GO:0031012 // GO:0031012 // GO:0005576 // GO:0005576 // GO:0005615 // GO:0005615 // GO:0005615 // GO:0031012 // GO:0031012 // GO:0031012 // GO:0005576	extracellular region // extracellular space // extracellular space // extracellular space // extracellular matrix // extracellular matrix // extracellular matrix // extracellular region // extracellular region // extracellular space // extracellular space // extracellular space // extracellular matrix // extracellular matrix // extracellular matrix // extracellular region // extracellular region …	not recorded // inferred from direct assay // inferred from electronic annotation // not recorded // inferred from direct assay // inferred from electronic annotation // not recorded // inferred from electronic annotation // not recorded // inferred from direct assay // inferred from electronic annotation // not recorded // inferred from direct assay // inferred from electronic annotation // not …	GO:0002020 // GO:0002020 // GO:0004867 // GO:0004867 // GO:0004867 // GO:0005102 // GO:0005102 // GO:0005515 // GO:0004867 // GO:0030414 // GO:0002020 // GO:0002020 // GO:0004867 // GO:0004867 // GO:0004867 // GO:0005102 // GO:0005102 // GO:0004867 // GO:0030414 // GO:0002020 // GO:0002020 // GO:0004867 // GO:0004867 // GO:0004867 // GO:0005102 // GO:0005102 // GO:0004867 // GO:0030414	protease binding // protease binding // serine-type endopeptidase inhibitor activity // serine-type endopeptidase inhibitor activity // serine-type endopeptidase inhibitor activity // receptor binding // receptor binding // protein binding // serine-type endopeptidase inhibitor activity // peptidase inhibitor activity // protease binding // protease binding // serine-type endopeptidase inhibitor …	inferred from electronic annotation // not recorded // not recorded // inferred from electronic annotation // traceable author statement // inferred from electronic annotation // not recorded // inferred from electronic annotation // --- // inferred from electronic annotation // inferred from electronic annotation // not recorded // not recorded // inferred from electronic annotation // traceable…	GenMAPP // GenMAPP // GenMAPP // GenMAPP // GenMAPP // GenMAPP	TGF_Beta_Signaling_Pathway // Blood_Clotting_Cascade // TGF_Beta_Signaling_Pathway // Blood_Clotting_Cascade // TGF_Beta_Signaling_Pathway // Blood_Clotting_Cascade	Pfam	IPR023796	Serpin domain	main	5.76764	7.13943	5.685	7.78757	8.82266	7.74324
10831940	Fkbp5	FK506 binding protein 5	0.0001244	0.1	138.15	516.34	3.7037	up	NM_001012174 // ENSRNOT00000033119 // BC085868	RefSeq // ENSEMBL // GenBank	Rattus norvegicus FK506 binding protein 5 (Fkbp5), mRNA. // cdna:known chromosome:Rnor_5.0:20:10177067:10219361:-1 gene:ENSRNOG00000022523 gene_biotype:protein_coding transcript_biotype:protein_coding // Rattus norvegicus FK506 binding protein 5, mRNA (cDNA clone MGC:94621 IMAGE:7191081), complete cds.	chr20	-	6637478	6725834	GO:0000413 // GO:0018208 // GO:0061077 // GO:0061077 // GO:0000413 // GO:0006457 // GO:0008150 // GO:0018208 // GO:0000413 // GO:0018208 // GO:0061077 // GO:0061077 // GO:0000413 // GO:0006457 // GO:0008150 // GO:0018208 // GO:0000413 // GO:0018208 // GO:0061077 // GO:0061077 // GO:0000413 // GO:0006457 // GO:0008150 // GO:0018208	protein peptidyl-prolyl isomerization // peptidyl-proline modification // chaperone-mediated protein folding // chaperone-mediated protein folding // protein peptidyl-prolyl isomerization // protein folding // biological_process // peptidyl-proline modification // protein peptidyl-prolyl isomerization // peptidyl-proline modification // chaperone-mediated protein folding // chaperone-mediated pro…	not recorded // not recorded // inferred from electronic annotation // not recorded // --- // inferred from electronic annotation // no biological data available // --- // not recorded // not recorded // inferred from electronic annotation // not recorded // --- // inferred from electronic annotation // no biological data available // --- // not recorded // not recorded // inferred from electroni…	GO:0005634 // GO:0005634 // GO:0005730 // GO:0016020 // GO:0005575 // GO:0016020 // GO:0005634 // GO:0005634 // GO:0005730 // GO:0016020 // GO:0005575 // GO:0016020 // GO:0005634 // GO:0005634 // GO:0005730 // GO:0016020 // GO:0005575 // GO:0016020	nucleus // nucleus // nucleolus // membrane // cellular_component // membrane // nucleus // nucleus // nucleolus // membrane // cellular_component // membrane // nucleus // nucleus // nucleolus // membrane // cellular_component // membrane	inferred from electronic annotation // not recorded // not recorded // not recorded // no biological data available // --- // inferred from electronic annotation // not recorded // not recorded // not recorded // no biological data available // --- // inferred from electronic annotation // not recorded // not recorded // not recorded // no biological data available // ---	GO:0003755 // GO:0005528 // GO:0031072 // GO:0031072 // GO:0003674 // GO:0003755 // GO:0005528 // GO:0003755 // GO:0005528 // GO:0031072 // GO:0031072 // GO:0005515 // GO:0003674 // GO:0003755 // GO:0005528 // GO:0003755 // GO:0005528 // GO:0031072 // GO:0031072 // GO:0003674 // GO:0003755 // GO:0005528	peptidyl-prolyl cis-trans isomerase activity // FK506 binding // heat shock protein binding // heat shock protein binding // molecular_function // peptidyl-prolyl cis-trans isomerase activity // FK506 binding // peptidyl-prolyl cis-trans isomerase activity // FK506 binding // heat shock protein binding // heat shock protein binding // protein binding // molecular_function // peptidyl-prolyl cis-t…	not recorded // not recorded // inferred from electronic annotation // not recorded // no biological data available // --- // --- // not recorded // not recorded // inferred from electronic annotation // not recorded // inferred from electronic annotation // no biological data available // --- // --- // not recorded // not recorded // inferred from electronic annotation // not recorded // no biol…	---	---	Pfam // Pfam	IPR001179 // IPR001440	Peptidyl-prolyl cis-trans isomerase, FKBP-type, domain // Tetratricopeptide TPR-1	main	7.20052	6.93697	7.22046	9.12825	9.49187	8.46929
10901166	Angptl4	angiopoietin-like 4	0.0086203	0.317	17.4	64.92	3.7037	up	NM_199115 // ENSRNOT00000010031 // BC078944	RefSeq // ENSEMBL // GenBank	Rattus norvegicus angiopoietin-like 4 (Angptl4), mRNA. // cdna:known chromosome:Rnor_5.0:7:18805416:18811643:-1 gene:ENSRNOG00000007545 gene_biotype:protein_coding transcript_biotype:protein_coding // Rattus norvegicus angiopoietin-like 4, mRNA (cDNA clone MGC:93779 IMAGE:7109431), complete cds.	chr7	-	16261621	16267852	GO:0001525 // GO:0001666 // GO:0019216 // GO:0030154 // GO:0043066 // GO:0043066 // GO:0043086 // GO:0051005 // GO:0051005 // GO:0051259 // GO:0051260 // GO:0070328 // GO:0070328 // GO:0007275 // GO:0051005 // GO:0001525 // GO:0001666 // GO:0019216 // GO:0030154 // GO:0043066 // GO:0043066 // GO:0043086 // GO:0051005 // GO:0051005 // GO:0051259 // GO:0051260 // GO:0070328 // GO:0070328 // GO:0007…	angiogenesis // response to hypoxia // regulation of lipid metabolic process // cell differentiation // negative regulation of apoptotic process // negative regulation of apoptotic process // negative regulation of catalytic activity // negative regulation of lipoprotein lipase activity // negative regulation of lipoprotein lipase activity // protein oligomerization // protein homooligomerization…	inferred from electronic annotation // inferred from expression pattern // traceable author statement // inferred from electronic annotation // inferred from electronic annotation // not recorded // traceable author statement // not recorded // traceable author statement // traceable author statement // inferred from direct assay // inferred from electronic annotation // not recorded // inferred …	GO:0005576 // GO:0005578 // GO:0005615 // GO:0005576 // GO:0005615 // GO:0005576 // GO:0005578 // GO:0005615 // GO:0005576 // GO:0005615 // GO:0005576 // GO:0005578 // GO:0005615 // GO:0005576 // GO:0005615	extracellular region // proteinaceous extracellular matrix // extracellular space // extracellular region // extracellular space // extracellular region // proteinaceous extracellular matrix // extracellular space // extracellular region // extracellular space // extracellular region // proteinaceous extracellular matrix // extracellular space // extracellular region // extracellular space	not recorded // inferred from electronic annotation // not recorded // inferred from electronic annotation // inferred from electronic annotation // not recorded // inferred from electronic annotation // not recorded // inferred from electronic annotation // inferred from electronic annotation // not recorded // inferred from electronic annotation // not recorded // inferred from electronic annot…	GO:0004857 // GO:0004857 // GO:0004857 // GO:0004857 // GO:0004857 // GO:0005515 // GO:0005102 // GO:0004857 // GO:0004857 // GO:0004857 // GO:0004857	enzyme inhibitor activity // enzyme inhibitor activity // enzyme inhibitor activity // enzyme inhibitor activity // enzyme inhibitor activity // protein binding // receptor binding // enzyme inhibitor activity // enzyme inhibitor activity // enzyme inhibitor activity // enzyme inhibitor activity	not recorded // traceable author statement // inferred from electronic annotation // not recorded // traceable author statement // inferred from electronic annotation // inferred from electronic annotation // inferred from electronic annotation // not recorded // traceable author statement // inferred from electronic annotation	---	---	Pfam	IPR002181	Fibrinogen, alpha/beta/gamma chain, C-terminal globular domain	main	3.9584	4.59531	3.83722	6.23247	7.046	4.83641
10925291	Cxcr7	chemokine (C-X-C motif) receptor 7	8.35e-05	0.0878	338.41	1269.87	3.7037	up	NM_053352 // ENSRNOT00000026558 // AF118816	RefSeq // ENSEMBL // GenBank	Rattus norvegicus chemokine (C-X-C motif) receptor 7 (Cxcr7), mRNA. // cdna:known chromosome:Rnor_5.0:9:97046851:97058372:1 gene:ENSRNOG00000019622 gene_biotype:protein_coding transcript_biotype:protein_coding // Rattus norvegicus orphan chemokine receptor mRNA, complete cds.	chr9	+	89343528	89355059	GO:0001525 // GO:0001570 // GO:0006935 // GO:0007155 // GO:0043066 // GO:0043066 // GO:0070098 // GO:0007165 // GO:0007186 // GO:0007275 // GO:0070098 // GO:0001525 // GO:0001570 // GO:0006935 // GO:0007155 // GO:0043066 // GO:0043066 // GO:0070098 // GO:0007186 // GO:0007275 // GO:0070098 // GO:0007165 // GO:0001525 // GO:0001570 // GO:0006935 // GO:0007155 // GO:0043066 // GO:0043066 // GO:0070…	angiogenesis // vasculogenesis // chemotaxis // cell adhesion // negative regulation of apoptotic process // negative regulation of apoptotic process // chemokine-mediated signaling pathway // signal transduction // G-protein coupled receptor signaling pathway // multicellular organismal development // chemokine-mediated signaling pathway // angiogenesis // vasculogenesis // chemotaxis // cell ad…	inferred from electronic annotation // inferred from electronic annotation // inferred from electronic annotation // inferred from electronic annotation // inferred from electronic annotation // not recorded // not recorded // inferred from electronic annotation // inferred from electronic annotation // inferred from electronic annotation // inferred from electronic annotation // inferred from el…	GO:0005769 // GO:0005886 // GO:0016021 // GO:0048471 // GO:0055037 // GO:0005737 // GO:0005768 // GO:0016020 // GO:0005769 // GO:0005886 // GO:0016021 // GO:0048471 // GO:0055037 // GO:0005737 // GO:0005768 // GO:0016020 // GO:0005769 // GO:0005886 // GO:0016021 // GO:0048471 // GO:0055037 // GO:0005737 // GO:0005768 // GO:0016020	early endosome // plasma membrane // integral to membrane // perinuclear region of cytoplasm // recycling endosome // cytoplasm // endosome // membrane // early endosome // plasma membrane // integral to membrane // perinuclear region of cytoplasm // recycling endosome // cytoplasm // endosome // membrane // early endosome // plasma membrane // integral to membrane // perinuclear region of cytopl…	inferred from electronic annotation // inferred from electronic annotation // inferred from electronic annotation // inferred from electronic annotation // inferred from electronic annotation // inferred from electronic annotation // inferred from electronic annotation // inferred from electronic annotation // inferred from electronic annotation // inferred from electronic annotation // inferred …	GO:0015026 // GO:0016494 // GO:0016494 // GO:0019956 // GO:0004871 // GO:0004930 // GO:0004950 // GO:0015026 // GO:0016494 // GO:0016494 // GO:0019956 // GO:0004871 // GO:0004930 // GO:0004950 // GO:0015026 // GO:0016494 // GO:0016494 // GO:0019956 // GO:0004871 // GO:0004930 // GO:0004950	coreceptor activity // C-X-C chemokine receptor activity // C-X-C chemokine receptor activity // chemokine binding // signal transducer activity // G-protein coupled receptor activity // chemokine receptor activity // coreceptor activity // C-X-C chemokine receptor activity // C-X-C chemokine receptor activity // chemokine binding // signal transducer activity // G-protein coupled receptor activi…	inferred from electronic annotation // inferred from electronic annotation // not recorded // inferred from electronic annotation // inferred from electronic annotation // inferred from electronic annotation // inferred from electronic annotation // inferred from electronic annotation // inferred from electronic annotation // not recorded // inferred from electronic annotation // inferred from el…	GenMAPP // GenMAPP // GenMAPP	GPCRDB_Class_A_Rhodopsin-like // GPCRDB_Class_A_Rhodopsin-like // GPCRDB_Class_A_Rhodopsin-like	Pfam	IPR000276	G protein-coupled receptor, rhodopsin-like	main	8.77268	8.58917	7.87361	10.4993	10.1784	10.3066
10870600	Fam151a	family with sequence similarity 151, member A	0.017905	0.393	140.13	501.03	3.57143	up	BC081977 // ENSRNOT00000010288	GenBank // ENSEMBL	Rattus norvegicus family with sequence similarity 151, member A, mRNA (cDNA clone MGC:94145 IMAGE:7127557), complete cds. // cdna:known chromosome:Rnor_5.0:5:130179452:130192201:1 gene:ENSRNOG00000007799 gene_biotype:protein_coding transcript_biotype:protein_coding	chr5	+	127809098	127821851	---	---	---	GO:0016021 // GO:0016020 // GO:0016021 // GO:0016020	integral to membrane // membrane // integral to membrane // membrane	inferred from electronic annotation // inferred from electronic annotation // inferred from electronic annotation // inferred from electronic annotation	---	---	---	---	---	Pfam	IPR019356	Protein of unknown function DUF2181	main	8.29149	7.41676	5.71111	9.11216	8.59602	9.25097
10731968	Cldn6	claudin 6	4.31e-05	0.0591	39.06	134.22	3.44828	up	NM_001102364 // ENSRNOT00000004845 // BC168250	RefSeq // ENSEMBL // GenBank	Rattus norvegicus claudin 6 (Cldn6), mRNA. // cdna:known chromosome:Rnor_5.0:10:12823135:12825907:1 gene:ENSRNOG00000003648 gene_biotype:protein_coding transcript_biotype:protein_coding // Rattus norvegicus claudin 6, mRNA (cDNA clone MGC:188391 IMAGE:5598970), complete cds.	chr10	+	12945822	12946518	---	---	---	GO:0005886 // GO:0005886 // GO:0005923 // GO:0005923 // GO:0016021 // GO:0016020 // GO:0030054 // GO:0005886 // GO:0005886 // GO:0005923 // GO:0005923 // GO:0016021 // GO:0016020 // GO:0030054 // GO:0005886 // GO:0005886 // GO:0005923 // GO:0005923 // GO:0016021 // GO:0016020 // GO:0030054	plasma membrane // plasma membrane // tight junction // tight junction // integral to membrane // membrane // cell junction // plasma membrane // plasma membrane // tight junction // tight junction // integral to membrane // membrane // cell junction // plasma membrane // plasma membrane // tight junction // tight junction // integral to membrane // membrane // cell junction	inferred from electronic annotation // not recorded // inferred from electronic annotation // not recorded // inferred from electronic annotation // inferred from electronic annotation // inferred from electronic annotation // inferred from electronic annotation // not recorded // inferred from electronic annotation // not recorded // inferred from electronic annotation // inferred from electroni…	GO:0005198 // GO:0005198 // GO:0005515 // GO:0005198	structural molecule activity // structural molecule activity // protein binding // structural molecule activity	inferred from electronic annotation // inferred from electronic annotation // inferred from electronic annotation // inferred from electronic annotation	---	---	Pfam	IPR004031	PMP-22/EMP/MP20/Claudin	main	5.12269	5.39368	5.374	7.30222	6.60421	7.35176
10771655	Cxcl10	chemokine (C-X-C motif) ligand 10	0.0039403	0.25	118.1	411.14	3.44828	up	ENSRNOT00000003075 // NM_139089 // BC058444	ENSEMBL // RefSeq // GenBank	cdna:known chromosome:Rnor_5.0:14:17126851:17129068:1 gene:ENSRNOG00000022256 gene_biotype:protein_coding transcript_biotype:protein_coding // Rattus norvegicus chemokine (C-X-C motif) ligand 10 (Cxcl10), mRNA. // Rattus norvegicus chemokine (C-X-C motif) ligand 10, mRNA (cDNA clone MGC:72680 IMAGE:6918440), complete cds.	chr14	+	17265974	17268183	GO:0002690 // GO:0006928 // GO:0006935 // GO:0006954 // GO:0006955 // GO:0007165 // GO:0007517 // GO:0008284 // GO:0008284 // GO:0009306 // GO:0009409 // GO:0009615 // GO:0010332 // GO:0010996 // GO:0016525 // GO:0030335 // GO:0032496 // GO:0033280 // GO:0034605 // GO:0051607 // GO:0051607 // GO:0002690 // GO:0006955 // GO:0008284 // GO:0030335 // GO:0002690 // GO:0006928 // GO:0006935 // GO:0006…	positive regulation of leukocyte chemotaxis // cellular component movement // chemotaxis // inflammatory response // immune response // signal transduction // muscle organ development // positive regulation of cell proliferation // positive regulation of cell proliferation // protein secretion // response to cold // response to virus // response to gamma radiation // response to auditory stimulus…	inferred from direct assay // traceable author statement // inferred from electronic annotation // inferred from electronic annotation // inferred from direct assay // inferred from direct assay // traceable author statement // inferred from direct assay // traceable author statement // inferred from direct assay // inferred from expression pattern // inferred from expression pattern // inferred …	GO:0005576 // GO:0005576 // GO:0005615 // GO:0005615 // GO:0009897 // GO:0009897 // GO:0005576 // GO:0005615 // GO:0005576 // GO:0005576 // GO:0005615 // GO:0005615 // GO:0009897 // GO:0009897 // GO:0005576 // GO:0005615 // GO:0005576 // GO:0005576 // GO:0005615 // GO:0005615 // GO:0009897 // GO:0009897 // GO:0005576 // GO:0005615	extracellular region // extracellular region // extracellular space // extracellular space // external side of plasma membrane // external side of plasma membrane // extracellular region // extracellular space // extracellular region // extracellular region // extracellular space // extracellular space // external side of plasma membrane // external side of plasma membrane // extracellular region…	not recorded // traceable author statement // inferred from direct assay // not recorded // inferred from electronic annotation // not recorded // inferred from electronic annotation // inferred from electronic annotation // not recorded // traceable author statement // inferred from direct assay // not recorded // inferred from electronic annotation // not recorded // inferred from electronic an…	GO:0005125 // GO:0008009 // GO:0008009 // GO:0005125 // GO:0008009 // GO:0005125 // GO:0008009 // GO:0008009 // GO:0005125 // GO:0008009 // GO:0005125 // GO:0008009 // GO:0008009 // GO:0005125 // GO:0008009	cytokine activity // chemokine activity // chemokine activity // cytokine activity // chemokine activity // cytokine activity // chemokine activity // chemokine activity // cytokine activity // chemokine activity // cytokine activity // chemokine activity // chemokine activity // cytokine activity // chemokine activity	traceable author statement // inferred from direct assay // traceable author statement // inferred from electronic annotation // inferred from electronic annotation // traceable author statement // inferred from direct assay // traceable author statement // inferred from electronic annotation // inferred from electronic annotation // traceable author statement // inferred from direct assay // tra…	---	---	Pfam	IPR001811	Chemokine interleukin-8-like domain	main	6.64168	7.52555	6.51197	8.10167	8.38864	9.61298
10828827	Cdkn1a	cyclin-dependent kinase inhibitor 1A	0.0109345	0.338	68.77	240.31	3.44828	up	ENSRNOT00000000628 // NM_080782 // BC100620	ENSEMBL // RefSeq // GenBank	cdna:known chromosome:Rnor_5.0:20:8592437:8602879:1 gene:ENSRNOG00000000521 gene_biotype:protein_coding transcript_biotype:protein_coding // Rattus norvegicus cyclin-dependent kinase inhibitor 1A (Cdkn1a), mRNA. // Rattus norvegicus cyclin-dependent kinase inhibitor 1A (p21, Cip1), mRNA (cDNA clone MGC:124547 IMAGE:7938247), complete cds.	chr20	+	7376325	7386778	GO:0000079 // GO:0000082 // GO:0000082 // GO:0000086 // GO:0000086 // GO:0006974 // GO:0006977 // GO:0006977 // GO:0007050 // GO:0007265 // GO:0007265 // GO:0007346 // GO:0008285 // GO:0008285 // GO:0009411 // GO:0009411 // GO:0009636 // GO:0010033 // GO:0010243 // GO:0010629 // GO:0010629 // GO:0014070 // GO:0030308 // GO:0030308 // GO:0030890 // GO:0030890 // GO:0031100 // GO:0031668 // GO:0031…	regulation of cyclin-dependent protein serine/threonine kinase activity // G1/S transition of mitotic cell cycle // G1/S transition of mitotic cell cycle // G2/M transition of mitotic cell cycle // G2/M transition of mitotic cell cycle // response to DNA damage stimulus // DNA damage response, signal transduction by p53 class mediator resulting in cell cycle arrest // DNA damage response, signal …	not recorded // inferred from electronic annotation // not recorded // inferred from electronic annotation // not recorded // not recorded // inferred from electronic annotation // not recorded // not recorded // inferred from electronic annotation // not recorded // not recorded // inferred from electronic annotation // not recorded // inferred from electronic annotation // not recorded // infer…	GO:0000307 // GO:0000307 // GO:0005634 // GO:0005634 // GO:0005737 // GO:0005737 // GO:0005829 // GO:0005829 // GO:0070557 // GO:0070557 // GO:0005634 // GO:0005737 // GO:0000307 // GO:0000307 // GO:0005634 // GO:0005634 // GO:0005737 // GO:0005737 // GO:0005829 // GO:0005829 // GO:0070557 // GO:0070557 // GO:0005634 // GO:0005737 // GO:0000307 // GO:0000307 // GO:0005634 // GO:0005634 // GO:0005…	cyclin-dependent protein kinase holoenzyme complex // cyclin-dependent protein kinase holoenzyme complex // nucleus // nucleus // cytoplasm // cytoplasm // cytosol // cytosol // PCNA-p21 complex // PCNA-p21 complex // nucleus // cytoplasm // cyclin-dependent protein kinase holoenzyme complex // cyclin-dependent protein kinase holoenzyme complex // nucleus // nucleus // cytoplasm // cytoplasm // c…	inferred from electronic annotation // not recorded // inferred from direct assay // not recorded // inferred from direct assay // not recorded // inferred from electronic annotation // not recorded // inferred from electronic annotation // not recorded // inferred from electronic annotation // inferred from electronic annotation // inferred from electronic annotation // not recorded // inferred …	GO:0004861 // GO:0004861 // GO:0005515 // GO:0019912 // GO:0019912 // GO:0030332 // GO:0030332 // GO:0032403 // GO:0005515 // GO:0016301 // GO:0004861 // GO:0004861 // GO:0005515 // GO:0019912 // GO:0019912 // GO:0030332 // GO:0030332 // GO:0032403 // GO:0016301 // GO:0004861 // GO:0004861 // GO:0005515 // GO:0019912 // GO:0019912 // GO:0030332 // GO:0030332 // GO:0032403 // GO:0016301	cyclin-dependent protein serine/threonine kinase inhibitor activity // cyclin-dependent protein serine/threonine kinase inhibitor activity // protein binding // cyclin-dependent protein kinase activating kinase activity // cyclin-dependent protein kinase activating kinase activity // cyclin binding // cyclin binding // protein complex binding // protein binding // kinase activity // cyclin-depend…	inferred from electronic annotation // not recorded // inferred from physical interaction // inferred from electronic annotation // not recorded // inferred from electronic annotation // not recorded // inferred from physical interaction // inferred from electronic annotation // inferred from electronic annotation // inferred from electronic annotation // not recorded // inferred from physical in…	GenMAPP // GenMAPP // GenMAPP // GenMAPP // GenMAPP // GenMAPP	Cell_cycle_KEGG // G1_to_S_cell_cycle_Reactome // Cell_cycle_KEGG // G1_to_S_cell_cycle_Reactome // Cell_cycle_KEGG // G1_to_S_cell_cycle_Reactome	Pfam	IPR003175	Cyclin-dependent kinase inhibitor	main	5.80091	6.77356	5.76397	6.76464	8.79406	8.22036
10878938	Plk3	polo-like kinase 3	0.0005879	0.157	54.65	180.27	3.33333	up	NM_022187 // ENSRNOT00000025197	RefSeq // ENSEMBL	Rattus norvegicus polo-like kinase 3 (Plk3), mRNA. // cdna:known chromosome:Rnor_5.0:5:139790975:139796149:-1 gene:ENSRNOG00000018484 gene_biotype:protein_coding transcript_biotype:protein_coding	chr5	-	137443540	137448700	GO:0000075 // GO:0000075 // GO:0000082 // GO:0000082 // GO:0000084 // GO:0000084 // GO:0000122 // GO:0000122 // GO:0000302 // GO:0000302 // GO:0006468 // GO:0006468 // GO:0006915 // GO:0006970 // GO:0006970 // GO:0006974 // GO:0006974 // GO:0009314 // GO:0009314 // GO:0043066 // GO:0043066 // GO:0043491 // GO:0043491 // GO:0048167 // GO:0048169 // GO:0090166 // GO:0090166 // GO:2000777 // GO:2000…	cell cycle checkpoint // cell cycle checkpoint // G1/S transition of mitotic cell cycle // G1/S transition of mitotic cell cycle // S phase of mitotic cell cycle // S phase of mitotic cell cycle // negative regulation of transcription from RNA polymerase II promoter // negative regulation of transcription from RNA polymerase II promoter // response to reactive oxygen species // response to reacti…	not recorded // inferred from sequence or structural similarity // not recorded // inferred from sequence or structural similarity // not recorded // inferred from sequence or structural similarity // not recorded // inferred from sequence or structural similarity // not recorded // inferred from sequence or structural similarity // not recorded // traceable author statement // inferred from elec…	GO:0005622 // GO:0005634 // GO:0005634 // GO:0005730 // GO:0005730 // GO:0005737 // GO:0005737 // GO:0005795 // GO:0005795 // GO:0005813 // GO:0005813 // GO:0030425 // GO:0043025 // GO:0005634 // GO:0005730 // GO:0005737 // GO:0005794 // GO:0005795 // GO:0005813 // GO:0005815 // GO:0005856 // GO:0030425 // GO:0042995 // GO:0005622 // GO:0005634 // GO:0005634 // GO:0005730 // GO:0005730 // GO:0005…	intracellular // nucleus // nucleus // nucleolus // nucleolus // cytoplasm // cytoplasm // Golgi stack // Golgi stack // centrosome // centrosome // dendrite // neuronal cell body // nucleus // nucleolus // cytoplasm // Golgi apparatus // Golgi stack // centrosome // microtubule organizing center // cytoskeleton // dendrite // cell projection // intracellular // nucleus // nucleus // nucleolus //…	not recorded // not recorded // inferred from sequence or structural similarity // not recorded // inferred from sequence or structural similarity // not recorded // inferred from sequence or structural similarity // not recorded // inferred from sequence or structural similarity // not recorded // inferred from sequence or structural similarity // inferred from direct assay // inferred from dire…	GO:0002039 // GO:0002039 // GO:0004672 // GO:0004674 // GO:0004674 // GO:0005515 // GO:0005524 // GO:0000166 // GO:0002039 // GO:0004672 // GO:0004674 // GO:0016301 // GO:0016740 // GO:0016772 // GO:0002039 // GO:0002039 // GO:0004672 // GO:0004674 // GO:0004674 // GO:0005515 // GO:0005524 // GO:0005515 // GO:0002039 // GO:0004674 // GO:0004713 // GO:0016772 // GO:0000166 // GO:0004672 // GO:0016…	p53 binding // p53 binding // protein kinase activity // protein serine/threonine kinase activity // protein serine/threonine kinase activity // protein binding // ATP binding // nucleotide binding // p53 binding // protein kinase activity // protein serine/threonine kinase activity // kinase activity // transferase activity // transferase activity, transferring phosphorus-containing groups // p5…	not recorded // inferred from sequence or structural similarity // traceable author statement // not recorded // inferred from sequence or structural similarity // inferred from physical interaction // inferred from electronic annotation // inferred from electronic annotation // inferred from electronic annotation // inferred from electronic annotation // inferred from electronic annotation // in…	---	---	Pfam // Pfam // Pfam	IPR000719 // IPR000959 // IPR001245	Protein kinase, catalytic domain // POLO box duplicated domain // Serine-threonine/tyrosine-protein kinase catalytic domain	main	5.72493	6.42305	5.19586	7.6859	7.33179	7.51723
10914799	Birc3	baculoviral IAP repeat-containing 3	0.0115245	0.343	20.96	69.09	3.33333	up	NM_023987 // ENSRNOT00000007702 // BC083555	RefSeq // ENSEMBL // GenBank	Rattus norvegicus baculoviral IAP repeat-containing 3 (Birc3), mRNA. // cdna:known chromosome:Rnor_5.0:8:6047455:6058253:-1 gene:ENSRNOG00000005731 gene_biotype:protein_coding transcript_biotype:protein_coding // Rattus norvegicus baculoviral IAP repeat-containing 3, mRNA (cDNA clone MGC:93416 IMAGE:7112819), complete cds.	chr8	-	4682202	4696856	GO:0007283 // GO:0042326 // GO:0043066 // GO:0051291 // GO:0060546 // GO:0070266 // GO:2000378 // GO:0016567 // GO:0042981 // GO:0007283 // GO:0042326 // GO:0043066 // GO:0051291 // GO:0060546 // GO:0070266 // GO:2000378 // GO:2000378 // GO:0042981 // GO:0042326 // GO:0060546 // GO:0070266 // GO:0016567 // GO:0007283 // GO:0042326 // GO:0043066 // GO:0051291 // GO:0060546 // GO:0070266 // GO:2000…	spermatogenesis // negative regulation of phosphorylation // negative regulation of apoptotic process // protein heterooligomerization // negative regulation of necroptosis // necroptosis // negative regulation of reactive oxygen species metabolic process // protein ubiquitination // regulation of apoptotic process // spermatogenesis // negative regulation of phosphorylation // negative regulatio…	inferred from expression pattern // not recorded // non-traceable author statement // inferred from physical interaction // not recorded // not recorded // not recorded // inferred from electronic annotation // inferred from electronic annotation // inferred from expression pattern // not recorded // non-traceable author statement // inferred from physical interaction // not recorded // not recor…	GO:0005622 // GO:0005634 // GO:0005737 // GO:0043234 // GO:0045121 // GO:0005634 // GO:0005737 // GO:0005622 // GO:0005634 // GO:0005737 // GO:0043234 // GO:0045121 // GO:0005634 // GO:0005737 // GO:0005622 // GO:0005634 // GO:0005737 // GO:0043234 // GO:0045121 // GO:0005634 // GO:0005737	intracellular // nucleus // cytoplasm // protein complex // membrane raft // nucleus // cytoplasm // intracellular // nucleus // cytoplasm // protein complex // membrane raft // nucleus // cytoplasm // intracellular // nucleus // cytoplasm // protein complex // membrane raft // nucleus // cytoplasm	inferred from electronic annotation // not recorded // not recorded // inferred from direct assay // inferred from direct assay // inferred from electronic annotation // inferred from electronic annotation // inferred from electronic annotation // not recorded // not recorded // inferred from direct assay // inferred from direct assay // inferred from electronic annotation // inferred from electr…	GO:0004842 // GO:0008270 // GO:0004842 // GO:0046872 // GO:0004842 // GO:0008270 // GO:0005515 // GO:0004842 // GO:0046872 // GO:0004842 // GO:0008270 // GO:0004842 // GO:0046872	ubiquitin-protein ligase activity // zinc ion binding // ubiquitin-protein ligase activity // metal ion binding // ubiquitin-protein ligase activity // zinc ion binding // protein binding // ubiquitin-protein ligase activity // metal ion binding // ubiquitin-protein ligase activity // zinc ion binding // ubiquitin-protein ligase activity // metal ion binding	not recorded // inferred from electronic annotation // inferred from electronic annotation // inferred from electronic annotation // not recorded // inferred from electronic annotation // inferred from electronic annotation // inferred from electronic annotation // inferred from electronic annotation // not recorded // inferred from electronic annotation // inferred from electronic annotation // …	GenMAPP // GenMAPP // GenMAPP	Apoptosis // Apoptosis // Apoptosis	Pfam // Pfam	IPR001315 // IPR001370	Caspase Recruitment // Baculoviral inhibition of apoptosis protein repeat	main	4.27465	4.6779	4.24443	5.36729	7.41124	5.60578
10708672	Prcp	prolylcarboxypeptidase (angiotensinase C)	0.0040716	0.251	85.19	273.2	3.22581	up	NM_001106281 // ENSRNOT00000014271	RefSeq // ENSEMBL	Rattus norvegicus prolylcarboxypeptidase (angiotensinase C) (Prcp), mRNA. // cdna:known chromosome:Rnor_5.0:1:163944735:163993907:1 gene:ENSRNOG00000010630 gene_biotype:protein_coding transcript_biotype:protein_coding	chr1	+	149711289	149763081	GO:0006508 // GO:0006508	proteolysis // proteolysis	inferred from electronic annotation // inferred from electronic annotation	---	---	---	GO:0008236 // GO:0008236	serine-type peptidase activity // serine-type peptidase activity	inferred from electronic annotation // inferred from electronic annotation	---	---	Pfam // Pfam // Pfam	IPR000073 // IPR008758 // IPR008761	Alpha/beta hydrolase fold-1 // Peptidase S28 // Peptidase S37, tripeptidyl aminopeptidase	main	6.91015	6.74234	5.61293	8.51918	8.32256	7.49255
10770048	Apcs	amyloid P component, serum	0.0322342	0.441	120.09	391.52	3.22581	up	ENSRNOT00000012092 // NM_017170 // X55761	ENSEMBL // RefSeq // GenBank	cdna:known chromosome:Rnor_5.0:13:95938000:95939037:-1 gene:ENSRNOG00000009086 gene_biotype:protein_coding transcript_biotype:protein_coding // Rattus norvegicus amyloid P component, serum (Apcs), mRNA. // R.norvegicus mRNA for serum amyloid P (SAP).	chr13	-	89112726	89113726	GO:0006461 // GO:0006461 // GO:0006461	protein complex assembly // protein complex assembly // protein complex assembly	inferred from physical interaction // inferred from physical interaction // inferred from physical interaction	GO:0005615 // GO:0005615 // GO:0031012 // GO:0031012 // GO:0043234 // GO:0005576 // GO:0005615 // GO:0005615 // GO:0031012 // GO:0031012 // GO:0043234 // GO:0005576 // GO:0005615 // GO:0005615 // GO:0031012 // GO:0031012 // GO:0043234 // GO:0005576	extracellular space // extracellular space // extracellular matrix // extracellular matrix // protein complex // extracellular region // extracellular space // extracellular space // extracellular matrix // extracellular matrix // protein complex // extracellular region // extracellular space // extracellular space // extracellular matrix // extracellular matrix // protein complex // extracellula…	inferred from electronic annotation // not recorded // inferred from electronic annotation // not recorded // inferred from direct assay // inferred from electronic annotation // inferred from electronic annotation // not recorded // inferred from electronic annotation // not recorded // inferred from direct assay // inferred from electronic annotation // inferred from electronic annotation // no…	GO:0046872 // GO:0030246 // GO:0046872 // GO:0046872	metal ion binding // carbohydrate binding // metal ion binding // metal ion binding	inferred from electronic annotation // inferred from electronic annotation // inferred from electronic annotation // inferred from electronic annotation	---	---	Pfam	IPR001759	Pentaxin	main	8.102	7.33299	5.31644	8.52118	8.51955	8.851
10819379	Adh1	alcohol dehydrogenase 1 (class I)	0.0009676	0.175	562.05	1824.34	3.22581	up	NM_019286 // ENSRNOT00000016346 // BC062403	RefSeq // ENSEMBL // GenBank	Rattus norvegicus alcohol dehydrogenase 1 (class I) (Adh1), mRNA. // cdna:known chromosome:Rnor_5.0:2:262090879:262102977:1 gene:ENSRNOG00000012464 gene_biotype:protein_coding transcript_biotype:protein_coding // Rattus norvegicus alcohol dehydrogenase 1 (class I), mRNA (cDNA clone MGC:72255 IMAGE:5621394), complete cds.	chr2	+	235799396	235811104	GO:0001523 // GO:0006068 // GO:0006069 // GO:0006069 // GO:0009790 // GO:0031100 // GO:0032526 // GO:0032570 // GO:0033574 // GO:0042572 // GO:0042573 // GO:0046186 // GO:0048149 // GO:0048545 // GO:0055114 // GO:0055114 // GO:0001523 // GO:0006068 // GO:0006069 // GO:0006069 // GO:0009790 // GO:0031100 // GO:0032526 // GO:0032570 // GO:0033574 // GO:0042572 // GO:0042573 // GO:0046186 // GO:0048…	retinoid metabolic process // ethanol catabolic process // ethanol oxidation // ethanol oxidation // embryo development // organ regeneration // response to retinoic acid // response to progesterone stimulus // response to testosterone stimulus // retinol metabolic process // retinoic acid metabolic process // acetaldehyde biosynthetic process // behavioral response to ethanol // response to ster…	not recorded // not recorded // inferred from direct assay // not recorded // inferred from expression pattern // inferred from expression pattern // not recorded // inferred from expression pattern // not recorded // not recorded // not recorded // inferred from direct assay // not recorded // not recorded // not recorded // inferred from electronic annotation // not recorded // not recorded // …	GO:0005622 // GO:0005739 // GO:0005829 // GO:0005737 // GO:0005622 // GO:0005739 // GO:0005829 // GO:0005622 // GO:0005739 // GO:0005737 // GO:0005622 // GO:0005739 // GO:0005829 // GO:0005737	intracellular // mitochondrion // cytosol // cytoplasm // intracellular // mitochondrion // cytosol // intracellular // mitochondrion // cytoplasm // intracellular // mitochondrion // cytosol // cytoplasm	not recorded // not recorded // inferred from direct assay // inferred from electronic annotation // not recorded // not recorded // inferred from direct assay // inferred from electronic annotation // inferred from electronic annotation // inferred from electronic annotation // not recorded // not recorded // inferred from direct assay // inferred from electronic annotation	GO:0004022 // GO:0004022 // GO:0004022 // GO:0004745 // GO:0008144 // GO:0008270 // GO:0016491 // GO:0035276 // GO:0042803 // GO:0051287 // GO:0004022 // GO:0046872 // GO:0004022 // GO:0004022 // GO:0004022 // GO:0004745 // GO:0008144 // GO:0008270 // GO:0016491 // GO:0035276 // GO:0042803 // GO:0051287 // GO:0042803 // GO:0004022 // GO:0046872 // GO:0004022 // GO:0004022 // GO:0004022 // GO:0004…	alcohol dehydrogenase (NAD) activity // alcohol dehydrogenase (NAD) activity // alcohol dehydrogenase (NAD) activity // retinol dehydrogenase activity // drug binding // zinc ion binding // oxidoreductase activity // ethanol binding // protein homodimerization activity // NAD binding // alcohol dehydrogenase (NAD) activity // metal ion binding // alcohol dehydrogenase (NAD) activity // alcohol de…	inferred from direct assay // not recorded // traceable author statement // inferred from direct assay // inferred from physical interaction // inferred from electronic annotation // inferred from electronic annotation // inferred from direct assay // not recorded // inferred from direct assay // inferred from electronic annotation // inferred from electronic annotation // inferred from direct as…	---	---	Pfam // Pfam	IPR013149 // IPR013154	Alcohol dehydrogenase, C-terminal // Alcohol dehydrogenase GroES-like	main	9.85933	9.05989	8.51196	10.9248	10.7147	10.9128
10866030	Olr1	oxidized low density lipoprotein (lectin-like) receptor 1	0.0288782	0.43	49.37	157.97	3.22581	up	NM_133306 // ENSRNOT00000011196 // AB005900	RefSeq // ENSEMBL // GenBank	Rattus norvegicus oxidized low density lipoprotein (lectin-like) receptor 1 (Olr1), mRNA. // cdna:known chromosome:Rnor_5.0:4:211883405:211905489:-1 gene:ENSRNOG00000008375 gene_biotype:protein_coding transcript_biotype:protein_coding // Rattus norvegicus mRNA for endothelial receptor for oxidized low-density lipoprotein, complete cds.	chr4	-	166747228	166769340	GO:0006954 // GO:0007159 // GO:0008219 // GO:0042157 // GO:0042542 // GO:0006954 // GO:0007155 // GO:0006954 // GO:0007159 // GO:0008219 // GO:0042157 // GO:0042542 // GO:0006954 // GO:0007155 // GO:0006954 // GO:0007159 // GO:0008219 // GO:0042157 // GO:0042542 // GO:0006954 // GO:0007155	inflammatory response // leukocyte cell-cell adhesion // cell death // lipoprotein metabolic process // response to hydrogen peroxide // inflammatory response // cell adhesion // inflammatory response // leukocyte cell-cell adhesion // cell death // lipoprotein metabolic process // response to hydrogen peroxide // inflammatory response // cell adhesion // inflammatory response // leukocyte cell-c…	inferred from mutant phenotype // inferred from mutant phenotype // inferred from mutant phenotype // inferred from mutant phenotype // inferred from expression pattern // inferred from electronic annotation // inferred from electronic annotation // inferred from mutant phenotype // inferred from mutant phenotype // inferred from mutant phenotype // inferred from mutant phenotype // inferred from…	GO:0005576 // GO:0005886 // GO:0016021 // GO:0005575 // GO:0016020 // GO:0005576 // GO:0005886 // GO:0016021 // GO:0005575 // GO:0016020 // GO:0005576 // GO:0005886 // GO:0016021 // GO:0005575 // GO:0016020	extracellular region // plasma membrane // integral to membrane // cellular_component // membrane // extracellular region // plasma membrane // integral to membrane // cellular_component // membrane // extracellular region // plasma membrane // integral to membrane // cellular_component // membrane	inferred from electronic annotation // inferred from electronic annotation // inferred from electronic annotation // no biological data available // inferred from electronic annotation // inferred from electronic annotation // inferred from electronic annotation // inferred from electronic annotation // no biological data available // inferred from electronic annotation // inferred from electroni…	GO:0004872 // GO:0005041 // GO:0005041 // GO:0030246 // GO:0005041 // GO:0004872 // GO:0005041 // GO:0005041 // GO:0030246 // GO:0005041 // GO:0004872 // GO:0005041 // GO:0005041 // GO:0030246 // GO:0005041	receptor activity // low-density lipoprotein receptor activity // low-density lipoprotein receptor activity // carbohydrate binding // low-density lipoprotein receptor activity // receptor activity // low-density lipoprotein receptor activity // low-density lipoprotein receptor activity // carbohydrate binding // low-density lipoprotein receptor activity // receptor activity // low-density lipopr…	traceable author statement // not recorded // traceable author statement // inferred from electronic annotation // inferred from electronic annotation // traceable author statement // not recorded // traceable author statement // inferred from electronic annotation // inferred from electronic annotation // traceable author statement // not recorded // traceable author statement // inferred from e…	---	---	Pfam // Pfam	IPR001304 // IPR008646	C-type lectin // Herpesvirus UL45-like	main	6.28839	6.12361	4.49238	6.68146	8.42347	6.85853
10867815	Ttpa	tocopherol (alpha) transfer protein	7.52e-05	0.0878	19.81	64.1	3.22581	up	NM_013048	RefSeq	Rattus norvegicus tocopherol (alpha) transfer protein (Ttpa), mRNA.	chr5	+	34638545	34659077	GO:0001890 // GO:0001892 // GO:0001892 // GO:0007584 // GO:0009268 // GO:0009636 // GO:0009636 // GO:0032502 // GO:0042360 // GO:0042360 // GO:0090212 // GO:0090212 // GO:0006810 // GO:0046909 // GO:0051180 // GO:0051452 // GO:0060548	placenta development // embryonic placenta development // embryonic placenta development // response to nutrient // response to pH // response to toxic substance // response to toxic substance // developmental process // vitamin E metabolic process // vitamin E metabolic process // negative regulation of establishment of blood-brain barrier // negative regulation of establishment of blood-brain b…	not recorded // inferred from electronic annotation // not recorded // inferred from expression pattern // inferred from direct assay // inferred from electronic annotation // not recorded // inferred from expression pattern // inferred from direct assay // not recorded // inferred from electronic annotation // not recorded // inferred from electronic annotation // inferred from sequence or struc…	GO:0005770 // GO:0005829 // GO:0005622 // GO:0005737	late endosome // cytosol // intracellular // cytoplasm	inferred from direct assay // inferred from direct assay // inferred from electronic annotation // inferred from electronic annotation	GO:0005215 // GO:0008431 // GO:0019842 // GO:0005546 // GO:0008289 // GO:0043325	transporter activity // vitamin E binding // vitamin binding // phosphatidylinositol-4,5-bisphosphate binding // lipid binding // phosphatidylinositol-3,4-bisphosphate binding	inferred from electronic annotation // inferred from direct assay // inferred from direct assay // inferred from sequence or structural similarity // inferred from electronic annotation // inferred from sequence or structural similarity	---	---	---	---	---	main	4.5496	3.95806	4.44393	6.13178	5.64582	6.28195
10934676	LOC681325	hypothetical protein LOC681325	0.0068503	0.294	20.27	65.11	3.22581	up	ENSRNOT00000030692 // FQ226125	ENSEMBL // GenBank	cdna:known_by_projection chromosome:Rnor_5.0:X:80538486:80542140:1 gene:ENSRNOG00000023005 gene_biotype:protein_coding transcript_biotype:protein_coding // Rattus norvegicus TL0AEA37YM22 mRNA sequence.	chrX	+	97612751	97613663	---	---	---	---	---	---	---	---	---	---	---	---	---	---	main	4.63984	4.48583	3.92481	4.99144	6.74204	6.39386
10816079	Fga	fibrinogen alpha chain	0.0298639	0.435	58.38	179.99	3.125	up	ENSRNOT00000064091 // NM_001008724 // ENSRNOT00000012192 // NM_052797 // FQ209852 // ENSRNOT00000064150	ENSEMBL // RefSeq // ENSEMBL // RefSeq // GenBank // ENSEMBL	cdna:known chromosome:Rnor_5.0:2:201420938:201428346:1 gene:ENSRNOG00000024848 gene_biotype:protein_coding transcript_biotype:protein_coding // Rattus norvegicus fibrinogen alpha chain (Fga), transcript variant 1, mRNA. // cdna:known chromosome:Rnor_5.0:2:201316925:201428141:1 gene:ENSRNOG00000024848 gene_biotype:protein_coding transcript_biotype:protein_coding // Rattus norvegicus fibrinogen alp…	chr2	+	174737640	174753780	GO:0007165 // GO:0007596 // GO:0007596 // GO:0030168 // GO:0042246 // GO:0051258 // GO:0051592 // GO:0051592 // GO:0007596 // GO:0007599 // GO:0007165 // GO:0007596 // GO:0007596 // GO:0030168 // GO:0042246 // GO:0051258 // GO:0051592 // GO:0051592 // GO:0007596 // GO:0007599 // GO:0007165 // GO:0007596 // GO:0007596 // GO:0030168 // GO:0042246 // GO:0051258 // GO:0051592 // GO:0051592 // GO:0007…	signal transduction // blood coagulation // blood coagulation // platelet activation // tissue regeneration // protein polymerization // response to calcium ion // response to calcium ion // blood coagulation // hemostasis // signal transduction // blood coagulation // blood coagulation // platelet activation // tissue regeneration // protein polymerization // response to calcium ion // response …	inferred from electronic annotation // not recorded // traceable author statement // inferred from electronic annotation // inferred from expression pattern // inferred from electronic annotation // inferred from electronic annotation // not recorded // inferred from electronic annotation // inferred from electronic annotation // inferred from electronic annotation // not recorded // traceable au…	GO:0005577 // GO:0005615 // GO:0005737 // GO:0005938 // GO:0005938 // GO:0009897 // GO:0009897 // GO:0031091 // GO:0031091 // GO:0072562 // GO:0005615 // GO:0009986 // GO:0005576 // GO:0005577 // GO:0005615 // GO:0005737 // GO:0005938 // GO:0005938 // GO:0009897 // GO:0009897 // GO:0031091 // GO:0031091 // GO:0072562 // GO:0005576 // GO:0005615 // GO:0009986 // GO:0005577 // GO:0005615 // GO:0005…	fibrinogen complex // extracellular space // cytoplasm // cell cortex // cell cortex // external side of plasma membrane // external side of plasma membrane // platelet alpha granule // platelet alpha granule // blood microparticle // extracellular space // cell surface // extracellular region // fibrinogen complex // extracellular space // cytoplasm // cell cortex // cell cortex // external side…	inferred from electronic annotation // not recorded // inferred from direct assay // inferred from electronic annotation // not recorded // inferred from electronic annotation // not recorded // inferred from electronic annotation // not recorded // inferred from direct assay // inferred from electronic annotation // inferred from electronic annotation // inferred from electronic annotation // in…	GO:0005102 // GO:0030674 // GO:0005515 // GO:0043499 // GO:0003674 // GO:0005102 // GO:0030674 // GO:0003674 // GO:0005102 // GO:0030674 // GO:0003674 // GO:0005102 // GO:0030674 // GO:0003674 // GO:0005102 // GO:0030674 // GO:0003674 // GO:0005102 // GO:0030674 // GO:0003674	receptor binding // protein binding, bridging // protein binding // eukaryotic cell surface binding // molecular_function // receptor binding // protein binding, bridging // molecular_function // receptor binding // protein binding, bridging // molecular_function // receptor binding // protein binding, bridging // molecular_function // receptor binding // protein binding, bridging // molecular_fu…	inferred from electronic annotation // inferred from electronic annotation // inferred from electronic annotation // inferred from electronic annotation // no biological data available // inferred from electronic annotation // inferred from electronic annotation // no biological data available // inferred from electronic annotation // inferred from electronic annotation // no biological data avai…	GenMAPP // GenMAPP // GenMAPP // GenMAPP // GenMAPP // GenMAPP	Blood_Clotting_Cascade // Blood_Clotting_Cascade // Blood_Clotting_Cascade // Blood_Clotting_Cascade // Blood_Clotting_Cascade // Blood_Clotting_Cascade	Pfam // Pfam // Pfam // Pfam // Pfam // Pfam	IPR002181 // IPR012290 // IPR021996 // IPR012290 // IPR021996 // IPR002181	Fibrinogen, alpha/beta/gamma chain, C-terminal globular domain // Fibrinogen, alpha/beta/gamma chain, coiled coil domain // Fibrinogen alpha C domain // Fibrinogen, alpha/beta/gamma chain, coiled coil domain // Fibrinogen alpha C domain // Fibrinogen, alpha/beta/gamma chain, C-terminal globular domain	main	5.9138	5.97616	5.73987	6.33544	8.98518	7.2076
10860900	Pdk4	pyruvate dehydrogenase kinase, isozyme 4	0.0082653	0.313	60.97	189.09	3.125	up	ENSRNOT00000012760 // NM_053551 // AF034577	ENSEMBL // RefSeq // GenBank	cdna:known chromosome:Rnor_5.0:4:30451701:30463752:-1 gene:ENSRNOG00000009565 gene_biotype:protein_coding transcript_biotype:protein_coding // Rattus norvegicus pyruvate dehydrogenase kinase, isozyme 4 (Pdk4), nuclear gene encoding mitochondrial protein, mRNA. // Rattus norvegicus pyruvate dehydrogenase kinase isoenzyme 4 (PDK4) mRNA, complete cds.	chr4	-	30235296	30245298	GO:0006006 // GO:0006086 // GO:0006468 // GO:0006468 // GO:0006468 // GO:0006885 // GO:0006885 // GO:0008286 // GO:0008286 // GO:0008286 // GO:0009267 // GO:0009267 // GO:0009267 // GO:0010510 // GO:0010510 // GO:0010510 // GO:0010565 // GO:0010565 // GO:0010906 // GO:0010906 // GO:0010906 // GO:0042304 // GO:0042304 // GO:0042304 // GO:0042593 // GO:0042593 // GO:0042594 // GO:0042594 // GO:0045…	glucose metabolic process // acetyl-CoA biosynthetic process from pyruvate // protein phosphorylation // protein phosphorylation // protein phosphorylation // regulation of pH // regulation of pH // insulin receptor signaling pathway // insulin receptor signaling pathway // insulin receptor signaling pathway // cellular response to starvation // cellular response to starvation // cellular respons…	inferred from electronic annotation // traceable author statement // inferred from direct assay // inferred from mutant phenotype // not recorded // not recorded // inferred from sequence or structural similarity // inferred from electronic annotation // not recorded // inferred from sequence or structural similarity // inferred from electronic annotation // not recorded // inferred from sequence…	GO:0005739 // GO:0005739 // GO:0005743 // GO:0005743 // GO:0005759 // GO:0005739 // GO:0005739 // GO:0005739 // GO:0005743 // GO:0005743 // GO:0005759 // GO:0005739 // GO:0005739 // GO:0005739 // GO:0005743 // GO:0005743 // GO:0005759 // GO:0005739	mitochondrion // mitochondrion // mitochondrial inner membrane // mitochondrial inner membrane // mitochondrial matrix // mitochondrion // mitochondrion // mitochondrion // mitochondrial inner membrane // mitochondrial inner membrane // mitochondrial matrix // mitochondrion // mitochondrion // mitochondrion // mitochondrial inner membrane // mitochondrial inner membrane // mitochondrial matrix //…	inferred from direct assay // not recorded // inferred from electronic annotation // not recorded // inferred from electronic annotation // inferred from electronic annotation // inferred from direct assay // not recorded // inferred from electronic annotation // not recorded // inferred from electronic annotation // inferred from electronic annotation // inferred from direct assay // not recorde…	GO:0004672 // GO:0004672 // GO:0004674 // GO:0004740 // GO:0004740 // GO:0005524 // GO:0005524 // GO:0005524 // GO:0005524 // GO:0016301 // GO:0000166 // GO:0004740 // GO:0016740 // GO:0004672 // GO:0004672 // GO:0004674 // GO:0004740 // GO:0004740 // GO:0005524 // GO:0005524 // GO:0005524 // GO:0005524 // GO:0000166 // GO:0004740 // GO:0016301 // GO:0016740 // GO:0004672 // GO:0004672 // GO:0004…	protein kinase activity // protein kinase activity // protein serine/threonine kinase activity // pyruvate dehydrogenase (acetyl-transferring) kinase activity // pyruvate dehydrogenase (acetyl-transferring) kinase activity // ATP binding // ATP binding // ATP binding // ATP binding // kinase activity // nucleotide binding // pyruvate dehydrogenase (acetyl-transferring) kinase activity // transfer…	inferred from electronic annotation // not recorded // inferred from electronic annotation // inferred from direct assay // inferred from mutant phenotype // inferred from direct assay // inferred from electronic annotation // inferred from mutant phenotype // not recorded // inferred from electronic annotation // inferred from electronic annotation // inferred from electronic annotation // infer…	GenMAPP // GenMAPP // GenMAPP	Krebs-TCA_Cycle // Krebs-TCA_Cycle // Krebs-TCA_Cycle	Pfam // Pfam	IPR003594 // IPR018955	Histidine kinase-like ATPase, ATP-binding domain // Branched-chain alpha-ketoacid dehydrogenase kinase/Pyruvate dehydrogenase kinase, N-terminal	main	5.58095	6.45048	5.78619	7.77556	8.36851	6.59751
10863023	LOC100365500	---	0.0251617	0.421	105.73	333.44	3.125	up	ENSRNOT00000074650 // FQ231665 // L17078 // X75533 // BC098746 // FQ226818	ENSEMBL // GenBank // GenBank // GenBank // GenBank // GenBank	cdna:known chromosome:Rnor_5.0:3:23144141:23144637:1 gene:ENSRNOG00000049284 gene_biotype:protein_coding transcript_biotype:protein_coding // Rattus norvegicus TL0AEA68YK12 mRNA sequence. // Rattus norvegicus NGF-binding Ig rearranged L-chain mRNA, V-region, partial cds. // R.norvegicus mRNA for V kappa 21/61. // Rattus norvegicus similar to NGF-binding Ig light chain, mRNA (cDNA clone MGC:112745…	chr4	-	102348196	102348683	---	---	---	---	---	---	GO:0005515 // GO:0005515	protein binding // protein binding	inferred from electronic annotation // inferred from electronic annotation	---	---	Pfam // Pfam // Pfam // Pfam	IPR013106 // IPR013151 // IPR013098 // IPR013106	Immunoglobulin V-set // Immunoglobulin // Immunoglobulin I-set // Immunoglobulin V-set	main	7.30436	6.10677	6.78931	7.1952	8.40544	9.59603
10794225	Nfil3	nuclear factor, interleukin 3 regulated	0.0225784	0.405	43.3	132.13	3.0303	up	NM_053727 // ENSRNOT00000015525 // BC072527	RefSeq // ENSEMBL // GenBank	Rattus norvegicus nuclear factor, interleukin 3 regulated (Nfil3), mRNA. // cdna:known chromosome:Rnor_5.0:17:14372306:14374095:1 gene:ENSRNOG00000011668 gene_biotype:protein_coding transcript_biotype:protein_coding // Rattus norvegicus nuclear factor, interleukin 3 regulated, mRNA (cDNA clone MGC:91562 IMAGE:7097417), complete cds.	chr17	+	18092489	18107708	GO:0000122 // GO:0007623 // GO:0010628 // GO:0010628 // GO:0071353 // GO:0000122 // GO:0006351 // GO:0006355 // GO:0048511 // GO:0071353 // GO:0000122 // GO:0007623 // GO:0010628 // GO:0010628 // GO:0071353 // GO:0000122 // GO:0006351 // GO:0006355 // GO:0048511 // GO:0071353 // GO:0000122 // GO:0007623 // GO:0010628 // GO:0010628 // GO:0071353 // GO:0000122 // GO:0006351 // GO:0006355 // GO:0048…	negative regulation of transcription from RNA polymerase II promoter // circadian rhythm // positive regulation of gene expression // positive regulation of gene expression // cellular response to interleukin-4 // negative regulation of transcription from RNA polymerase II promoter // transcription, DNA-dependent // regulation of transcription, DNA-dependent // rhythmic process // cellular respon…	not recorded // inferred from electronic annotation // inferred from electronic annotation // not recorded // not recorded // inferred from electronic annotation // inferred from electronic annotation // inferred from electronic annotation // inferred from electronic annotation // inferred from electronic annotation // not recorded // inferred from electronic annotation // inferred from electroni…	GO:0005634 // GO:0005634 // GO:0005634 // GO:0005634 // GO:0005634 // GO:0005634	nucleus // nucleus // nucleus // nucleus // nucleus // nucleus	inferred from electronic annotation // not recorded // inferred from electronic annotation // not recorded // inferred from electronic annotation // not recorded	GO:0000977 // GO:0000979 // GO:0000979 // GO:0001078 // GO:0001078 // GO:0003700 // GO:0000977 // GO:0003677 // GO:0003700 // GO:0043565 // GO:0000977 // GO:0000979 // GO:0000979 // GO:0001078 // GO:0001078 // GO:0003700 // GO:0005515 // GO:0000977 // GO:0046983 // GO:0043565 // GO:0003677 // GO:0003700 // GO:0000977 // GO:0000979 // GO:0000979 // GO:0001078 // GO:0001078 // GO:0003700 // GO:0000…	RNA polymerase II regulatory region sequence-specific DNA binding // RNA polymerase II core promoter sequence-specific DNA binding // RNA polymerase II core promoter sequence-specific DNA binding // RNA polymerase II core promoter proximal region sequence-specific DNA binding transcription factor activity involved in negative regulation of transcription // RNA polymerase II core promoter proximal…	not recorded // inferred from electronic annotation // not recorded // inferred from electronic annotation // not recorded // inferred from direct assay // inferred from electronic annotation // inferred from electronic annotation // inferred from electronic annotation // inferred from electronic annotation // not recorded // inferred from electronic annotation // not recorded // inferred from el…	---	---	Pfam // Pfam	IPR004827 // IPR010533	Basic-leucine zipper domain // Vertebrate interleukin-3 regulated transcription factor	main	4.93428	6.56963	4.83219	6.19146	7.72632	7.27259
10822290	Lrrcc1	leucine rich repeat and coiled-coil centrosomal protein 1	0.0011135	0.177	62.18	187.82	3.0303	up	NM_001100645 // ENSRNOT00000014762	RefSeq // ENSEMBL	Rattus norvegicus leucine rich repeat and coiled-coil centrosomal protein 1 (Lrrcc1), mRNA. // cdna:known chromosome:Rnor_5.0:2:108155535:108184411:-1 gene:ENSRNOG00000010891 gene_biotype:protein_coding transcript_biotype:protein_coding	chr2	-	88572680	88589703	---	---	---	GO:0005634 // GO:0005730 // GO:0005737 // GO:0005813 // GO:0005634 // GO:0005730 // GO:0005737 // GO:0005813 // GO:0005634 // GO:0005737 // GO:0005813	nucleus // nucleolus // cytoplasm // centrosome // nucleus // nucleolus // cytoplasm // centrosome // nucleus // cytoplasm // centrosome	not recorded // not recorded // not recorded // not recorded // not recorded // not recorded // not recorded // not recorded // inferred from electronic annotation // inferred from electronic annotation // inferred from electronic annotation	GO:0005515	protein binding	inferred from electronic annotation	GenMAPP // GenMAPP // GenMAPP // GenMAPP	Cell_cycle_KEGG // G1_to_S_cell_cycle_Reactome // Cell_cycle_KEGG // G1_to_S_cell_cycle_Reactome	Pfam	IPR001611	Leucine-rich repeat	main	6.36147	6.15281	5.3882	7.13358	7.62183	7.95703
10841226	LOC690507	similar to Vomeromodulin	0.0444174	0.488	13.77	41.8	3.0303	up	ENSRNOT00000020968 // ENSRNOT00000063922	ENSEMBL // ENSEMBL	cdna:known chromosome:Rnor_5.0:3:156174613:156181781:1 gene:ENSRNOG00000015637 gene_biotype:protein_coding transcript_biotype:protein_coding // cdna:known chromosome:Rnor_5.0:3:156182452:156185617:1 gene:ENSRNOG00000015637 gene_biotype:protein_coding transcript_biotype:protein_coding	chr3	+	144720783	144735978	GO:0006810 // GO:0006810	transport // transport	inferred from electronic annotation // inferred from electronic annotation	---	---	---	---	---	---	---	---	---	---	---	main	3.76719	3.66601	3.94434	5.27851	6.94637	3.98431
10917116	Zbtb16	zinc finger and BTB domain containing 16	0.0015069	0.198	90.84	277.47	3.0303	up	NM_001013181 // ENSRNOT00000045356 // AY781103	RefSeq // ENSEMBL // GenBank	Rattus norvegicus zinc finger and BTB domain containing 16 (Zbtb16), mRNA. // cdna:known chromosome:Rnor_5.0:8:51578440:51739786:-1 gene:ENSRNOG00000029980 gene_biotype:protein_coding transcript_biotype:protein_coding // Rattus norvegicus strain BN/Cub promyelocytic leukemia zinc finger protein (Zfp145) mRNA, complete cds.	chr8	-	51931505	52094813	GO:0000122 // GO:0001501 // GO:0001823 // GO:0001823 // GO:0006355 // GO:0007417 // GO:0007417 // GO:0008285 // GO:0008285 // GO:0009880 // GO:0009880 // GO:0009952 // GO:0009952 // GO:0030097 // GO:0030097 // GO:0030326 // GO:0032332 // GO:0032332 // GO:0034504 // GO:0035116 // GO:0035116 // GO:0035136 // GO:0035136 // GO:0035137 // GO:0042733 // GO:0043065 // GO:0043065 // GO:0045600 // GO:0045…	negative regulation of transcription from RNA polymerase II promoter // skeletal system development // mesonephros development // mesonephros development // regulation of transcription, DNA-dependent // central nervous system development // central nervous system development // negative regulation of cell proliferation // negative regulation of cell proliferation // embryonic pattern specificatio…	traceable author statement // not recorded // not recorded // inferred from sequence or structural similarity // not recorded // not recorded // inferred from sequence or structural similarity // inferred from electronic annotation // not recorded // inferred from electronic annotation // not recorded // inferred from electronic annotation // not recorded // not recorded // inferred from sequence…	GO:0005634 // GO:0005634 // GO:0005634 // GO:0005829 // GO:0005886 // GO:0016604 // GO:0016604 // GO:0016605 // GO:0016605 // GO:0016607 // GO:0016607 // GO:0017053 // GO:0017053 // GO:0005634 // GO:0016604 // GO:0016605 // GO:0016607 // GO:0005634 // GO:0005634 // GO:0005634 // GO:0005829 // GO:0005886 // GO:0016604 // GO:0016604 // GO:0016605 // GO:0016605 // GO:0016607 // GO:0016607 // GO:0017…	nucleus // nucleus // nucleus // cytosol // plasma membrane // nuclear body // nuclear body // PML body // PML body // nuclear speck // nuclear speck // transcriptional repressor complex // transcriptional repressor complex // nucleus // nuclear body // PML body // nuclear speck // nucleus // nucleus // nucleus // cytosol // plasma membrane // nuclear body // nuclear body // PML body // PML body …	inferred from direct assay // not recorded // inferred from sequence or structural similarity // inferred from direct assay // inferred from direct assay // not recorded // inferred from sequence or structural similarity // not recorded // inferred from sequence or structural similarity // not recorded // inferred from sequence or structural similarity // inferred from electronic annotation // no…	GO:0003677 // GO:0003690 // GO:0003700 // GO:0008022 // GO:0008270 // GO:0019904 // GO:0042802 // GO:0042803 // GO:0042803 // GO:0042803 // GO:0003677 // GO:0042802 // GO:0042803 // GO:0003676 // GO:0046872 // GO:0003677 // GO:0003690 // GO:0003700 // GO:0008022 // GO:0008270 // GO:0019904 // GO:0042802 // GO:0042803 // GO:0042803 // GO:0042803 // GO:0005515 // GO:0003677 // GO:0042802 // GO:0042…	DNA binding // double-stranded DNA binding // sequence-specific DNA binding transcription factor activity // protein C-terminus binding // zinc ion binding // protein domain specific binding // identical protein binding // protein homodimerization activity // protein homodimerization activity // protein homodimerization activity // DNA binding // identical protein binding // protein homodimerizat…	not recorded // inferred from direct assay // inferred from direct assay // inferred from physical interaction // inferred from electronic annotation // inferred from physical interaction // not recorded // not recorded // inferred from sequence or structural similarity // traceable author statement // inferred from electronic annotation // inferred from electronic annotation // inferred from ele…	---	---	Pfam // Pfam	IPR007087 // IPR013069	Zinc finger, C2H2 // BTB/POZ	main	6.16959	6.66043	6.7132	8.06361	8.81239	7.52548
10922964	RGD1305645	similar to RIKEN cDNA 1500015O10	0.0004245	0.143	185.05	562.95	3.0303	up	NM_001271051 // ENSRNOT00000036990	RefSeq // ENSEMBL	Rattus norvegicus similar to RIKEN cDNA 1500015O10 (RGD1305645), mRNA. // cdna:known chromosome:Rnor_5.0:9:50191737:50212523:1 gene:ENSRNOG00000023576 gene_biotype:protein_coding transcript_biotype:protein_coding	chr9	+	42931200	42950605	GO:0008054 // GO:0008054 // GO:0070314 // GO:0070314 // GO:0090398 // GO:0090398 // GO:0008054 // GO:0008054 // GO:0070314 // GO:0070314 // GO:0090398 // GO:0090398	cyclin catabolic process // cyclin catabolic process // G1 to G0 transition // G1 to G0 transition // cellular senescence // cellular senescence // cyclin catabolic process // cyclin catabolic process // G1 to G0 transition // G1 to G0 transition // cellular senescence // cellular senescence	inferred from electronic annotation // not recorded // inferred from electronic annotation // not recorded // inferred from electronic annotation // not recorded // inferred from electronic annotation // not recorded // inferred from electronic annotation // not recorded // inferred from electronic annotation // not recorded	GO:0005615 // GO:0005615 // GO:0030133 // GO:0005576 // GO:0031410 // GO:0005615 // GO:0005615 // GO:0030133 // GO:0005576 // GO:0031410	extracellular space // extracellular space // transport vesicle // extracellular region // cytoplasmic vesicle // extracellular space // extracellular space // transport vesicle // extracellular region // cytoplasmic vesicle	inferred from electronic annotation // not recorded // inferred from electronic annotation // inferred from electronic annotation // inferred from electronic annotation // inferred from electronic annotation // not recorded // inferred from electronic annotation // inferred from electronic annotation // inferred from electronic annotation	---	---	---	---	---	---	---	---	main	7.93399	7.76903	6.91971	9.1411	9.21725	9.1051
10719530	Apoe	apolipoprotein E	2.04e-05	0.0429	622.1	1814.49	2.94118	up	NM_001270681 // NM_138828 // NM_001270682 // NM_001270683 // NM_001270684 // ENSRNOT00000041891 // BC086581	RefSeq // RefSeq // RefSeq // RefSeq // RefSeq // ENSEMBL // GenBank	Rattus norvegicus apolipoprotein E (Apoe), transcript variant 1, mRNA. // Rattus norvegicus apolipoprotein E (Apoe), transcript variant 2, mRNA. // Rattus norvegicus apolipoprotein E (Apoe), transcript variant 3, mRNA. // Rattus norvegicus apolipoprotein E (Apoe), transcript variant 4, mRNA. // Rattus norvegicus apolipoprotein E (Apoe), transcript variant 5, mRNA. // cdna:known chromosome:Rnor_5.…	chr1	-	79003634	79006413	GO:0001937 // GO:0001937 // GO:0002021 // GO:0002021 // GO:0006629 // GO:0006641 // GO:0006641 // GO:0006707 // GO:0006707 // GO:0006869 // GO:0006874 // GO:0006874 // GO:0006898 // GO:0006898 // GO:0006917 // GO:0006979 // GO:0006979 // GO:0007186 // GO:0007186 // GO:0007263 // GO:0007263 // GO:0007568 // GO:0008104 // GO:0008203 // GO:0010468 // GO:0010468 // GO:0010544 // GO:0010544 // GO:0010…	negative regulation of endothelial cell proliferation // negative regulation of endothelial cell proliferation // response to dietary excess // response to dietary excess // lipid metabolic process // triglyceride metabolic process // triglyceride metabolic process // cholesterol catabolic process // cholesterol catabolic process // lipid transport // cellular calcium ion homeostasis // cellular …	inferred from electronic annotation // not recorded // inferred from electronic annotation // not recorded // not recorded // inferred from electronic annotation // not recorded // inferred from electronic annotation // not recorded // inferred from direct assay // inferred from electronic annotation // not recorded // inferred from electronic annotation // not recorded // inferred from electroni…	GO:0005615 // GO:0005615 // GO:0005737 // GO:0005769 // GO:0005770 // GO:0005794 // GO:0005874 // GO:0005886 // GO:0030425 // GO:0031232 // GO:0034361 // GO:0034361 // GO:0034362 // GO:0034362 // GO:0034363 // GO:0034363 // GO:0034364 // GO:0034364 // GO:0042627 // GO:0042627 // GO:0043025 // GO:0005576 // GO:0005615 // GO:0005615 // GO:0005615 // GO:0005737 // GO:0005769 // GO:0005770 // GO:0005…	extracellular space // extracellular space // cytoplasm // early endosome // late endosome // Golgi apparatus // microtubule // plasma membrane // dendrite // extrinsic to external side of plasma membrane // very-low-density lipoprotein particle // very-low-density lipoprotein particle // low-density lipoprotein particle // low-density lipoprotein particle // intermediate-density lipoprotein part…	inferred from direct assay // not recorded // inferred from direct assay // inferred from direct assay // inferred from direct assay // inferred from direct assay // inferred from direct assay // inferred from direct assay // inferred from direct assay // inferred from direct assay // inferred from electronic annotation // not recorded // inferred from electronic annotation // not recorded // inf…	GO:0001540 // GO:0001540 // GO:0001540 // GO:0005319 // GO:0005319 // GO:0005543 // GO:0005543 // GO:0008201 // GO:0008201 // GO:0008289 // GO:0016209 // GO:0016209 // GO:0017127 // GO:0017127 // GO:0042802 // GO:0042803 // GO:0042803 // GO:0046848 // GO:0046911 // GO:0046911 // GO:0046982 // GO:0046982 // GO:0048156 // GO:0048156 // GO:0050750 // GO:0050750 // GO:0060228 // GO:0060228 // GO:0070…	beta-amyloid binding // beta-amyloid binding // beta-amyloid binding // lipid transporter activity // lipid transporter activity // phospholipid binding // phospholipid binding // heparin binding // heparin binding // lipid binding // antioxidant activity // antioxidant activity // cholesterol transporter activity // cholesterol transporter activity // identical protein binding // protein homodim…	inferred from direct assay // not recorded // inferred from sequence or structural similarity // inferred from direct assay // not recorded // inferred from direct assay // not recorded // inferred from electronic annotation // not recorded // not recorded // inferred from electronic annotation // not recorded // inferred from electronic annotation // not recorded // not recorded // inferred from…	GenMAPP // GenMAPP // GenMAPP // GenMAPP // GenMAPP // GenMAPP // GenMAPP	Statin_Pathway_PharmGKB // Statin_Pathway_PharmGKB // Statin_Pathway_PharmGKB // Statin_Pathway_PharmGKB // Statin_Pathway_PharmGKB // Statin_Pathway_PharmGKB // Statin_Pathway_PharmGKB	Pfam	IPR000074	Apolipoprotein A1/A4/E	main	9.25834	9.5646	9.04761	11.008	10.77	10.7509
10723822	Tsku	tsukushi, small leucine rich proteoglycan	0.002612	0.209	141.83	417.1	2.94118	up	NM_001009965 // ENSRNOT00000034843 // AY533242	RefSeq // ENSEMBL // GenBank	Rattus norvegicus tsukushi, small leucine rich proteoglycan (Tsku), mRNA. // cdna:known chromosome:Rnor_5.0:1:169524021:169535753:-1 gene:ENSRNOG00000027784 gene_biotype:protein_coding transcript_biotype:protein_coding // Rattus norvegicus hepatic protein EIIH (Eiih) mRNA, complete cds.	chr1	-	155611069	155622378	GO:0010468 // GO:0021540 // GO:0021540 // GO:0021670 // GO:0021670 // GO:0021960 // GO:0021960 // GO:0030178 // GO:0043010 // GO:0061073 // GO:0010468 // GO:0021540 // GO:0021540 // GO:0021670 // GO:0021670 // GO:0021960 // GO:0021960 // GO:0030178 // GO:0043010 // GO:0061073 // GO:0010468 // GO:0030178 // GO:0043010 // GO:0061073 // GO:0010468 // GO:0021540 // GO:0021540 // GO:0021670 // GO:0021…	regulation of gene expression // corpus callosum morphogenesis // corpus callosum morphogenesis // lateral ventricle development // lateral ventricle development // anterior commissure morphogenesis // anterior commissure morphogenesis // negative regulation of Wnt receptor signaling pathway // camera-type eye development // ciliary body morphogenesis // regulation of gene expression // corpus ca…	not recorded // inferred from electronic annotation // not recorded // inferred from electronic annotation // not recorded // inferred from electronic annotation // not recorded // not recorded // not recorded // not recorded // not recorded // inferred from electronic annotation // not recorded // inferred from electronic annotation // not recorded // inferred from electronic annotation // not r…	GO:0005576 // GO:0005615 // GO:0005576 // GO:0005615 // GO:0005615 // GO:0005576 // GO:0005615	extracellular region // extracellular space // extracellular region // extracellular space // extracellular space // extracellular region // extracellular space	inferred from electronic annotation // not recorded // inferred from electronic annotation // not recorded // inferred from electronic annotation // inferred from electronic annotation // not recorded	GO:0005515	protein binding	inferred from electronic annotation	---	---	Pfam	IPR001611	Leucine-rich repeat	main	7.52986	7.62915	6.31266	8.7834	8.83681	8.54539
10740869	Tnfrsf12a	tumor necrosis factor receptor superfamily, member 12a	3.57e-05	0.0542	103.3	304.4	2.94118	up	ENSRNOT00000004842 // NM_181086 // BC060537	ENSEMBL // RefSeq // GenBank	cdna:known chromosome:Rnor_5.0:10:12818949:12820979:-1 gene:ENSRNOG00000003546 gene_biotype:protein_coding transcript_biotype:protein_coding // Rattus norvegicus tumor necrosis factor receptor superfamily, member 12a (Tnfrsf12a), mRNA. // Rattus norvegicus tumor necrosis factor receptor superfamily, member 12a, mRNA (cDNA clone MGC:72653 IMAGE:6887545), complete cds.	chr10	-	12940329	12942347	GO:0006917 // GO:0006917 // GO:0006931 // GO:0006931 // GO:0007155 // GO:0008219 // GO:0008219 // GO:0045773 // GO:0045773 // GO:2001238 // GO:2001238 // GO:0007155 // GO:0006917 // GO:0006917 // GO:0006931 // GO:0006931 // GO:0007155 // GO:0008219 // GO:0008219 // GO:0045773 // GO:0045773 // GO:2001238 // GO:2001238 // GO:0006917 // GO:0006917 // GO:0006931 // GO:0006931 // GO:0007155 // GO:0008…	induction of apoptosis // induction of apoptosis // substrate-dependent cell migration, cell attachment to substrate // substrate-dependent cell migration, cell attachment to substrate // cell adhesion // cell death // cell death // positive regulation of axon extension // positive regulation of axon extension // positive regulation of extrinsic apoptotic signaling pathway // positive regulation …	inferred from electronic annotation // not recorded // inferred from electronic annotation // not recorded // not recorded // inferred from electronic annotation // not recorded // inferred from electronic annotation // not recorded // inferred from electronic annotation // not recorded // inferred from electronic annotation // inferred from electronic annotation // not recorded // inferred from …	GO:0001726 // GO:0001726 // GO:0005886 // GO:0005886 // GO:0009986 // GO:0009986 // GO:0016021 // GO:0001726 // GO:0001726 // GO:0005886 // GO:0005886 // GO:0009986 // GO:0009986 // GO:0016021 // GO:0001726 // GO:0001726 // GO:0005886 // GO:0005886 // GO:0009986 // GO:0009986 // GO:0016021	ruffle // ruffle // plasma membrane // plasma membrane // cell surface // cell surface // integral to membrane // ruffle // ruffle // plasma membrane // plasma membrane // cell surface // cell surface // integral to membrane // ruffle // ruffle // plasma membrane // plasma membrane // cell surface // cell surface // integral to membrane	inferred from electronic annotation // not recorded // inferred from electronic annotation // not recorded // inferred from electronic annotation // not recorded // inferred from electronic annotation // inferred from electronic annotation // not recorded // inferred from electronic annotation // not recorded // inferred from electronic annotation // not recorded // inferred from electronic annot…	GO:0005515	protein binding	inferred from electronic annotation	---	---	Pfam	IPR022316	Tumour necrosis factor receptor 12	main	6.5737	6.56033	6.96564	8.013	8.54338	8.24597
10925303	Mlph	melanophilin	0.0035353	0.241	44.64	129.43	2.94118	up	NM_001012135 // ENSRNOT00000026795 // BC081894	RefSeq // ENSEMBL // GenBank	Rattus norvegicus melanophilin (Mlph), mRNA. // cdna:known chromosome:Rnor_5.0:9:97753779:97789585:1 gene:ENSRNOG00000019763 gene_biotype:protein_coding transcript_biotype:protein_coding // Rattus norvegicus melanophilin, mRNA (cDNA clone MGC:93800 IMAGE:7110013), complete cds.	chr9	+	90113308	90149118	GO:0006605 // GO:0006605 // GO:0030318 // GO:0030318 // GO:0032400 // GO:0032400 // GO:0043473 // GO:0006886 // GO:0006605 // GO:0006605 // GO:0030318 // GO:0030318 // GO:0032400 // GO:0032400 // GO:0043473 // GO:0006886 // GO:0043473 // GO:0006605 // GO:0006605 // GO:0030318 // GO:0030318 // GO:0032400 // GO:0032400 // GO:0043473 // GO:0006886	protein targeting // protein targeting // melanocyte differentiation // melanocyte differentiation // melanosome localization // melanosome localization // pigmentation // intracellular protein transport // protein targeting // protein targeting // melanocyte differentiation // melanocyte differentiation // melanosome localization // melanosome localization // pigmentation // intracellular protei…	inferred from electronic annotation // not recorded // inferred from electronic annotation // not recorded // inferred from electronic annotation // not recorded // not recorded // inferred from electronic annotation // inferred from electronic annotation // not recorded // inferred from electronic annotation // not recorded // inferred from electronic annotation // not recorded // not recorded /…	GO:0001725 // GO:0001725 // GO:0005815 // GO:0005815 // GO:0015629 // GO:0030864 // GO:0030864 // GO:0035371 // GO:0035371 // GO:0042470 // GO:0001725 // GO:0001725 // GO:0005815 // GO:0005815 // GO:0015629 // GO:0030864 // GO:0030864 // GO:0035371 // GO:0035371 // GO:0042470 // GO:0005622 // GO:0015629 // GO:0001725 // GO:0001725 // GO:0005815 // GO:0005815 // GO:0015629 // GO:0030864 // GO:0030…	stress fiber // stress fiber // microtubule organizing center // microtubule organizing center // actin cytoskeleton // cortical actin cytoskeleton // cortical actin cytoskeleton // microtubule plus end // microtubule plus end // melanosome // stress fiber // stress fiber // microtubule organizing center // microtubule organizing center // actin cytoskeleton // cortical actin cytoskeleton // cort…	inferred from electronic annotation // not recorded // inferred from electronic annotation // not recorded // not recorded // inferred from electronic annotation // not recorded // inferred from electronic annotation // not recorded // not recorded // inferred from electronic annotation // not recorded // inferred from electronic annotation // not recorded // not recorded // inferred from electro…	GO:0003779 // GO:0003779 // GO:0008270 // GO:0017022 // GO:0017137 // GO:0017137 // GO:0031489 // GO:0031489 // GO:0051010 // GO:0051010 // GO:0003779 // GO:0003779 // GO:0008270 // GO:0017022 // GO:0017137 // GO:0017137 // GO:0031489 // GO:0031489 // GO:0051010 // GO:0051010 // GO:0005515 // GO:0017022 // GO:0003779 // GO:0003779 // GO:0008270 // GO:0017022 // GO:0017137 // GO:0017137 // GO:0031…	actin binding // actin binding // zinc ion binding // myosin binding // Rab GTPase binding // Rab GTPase binding // myosin V binding // myosin V binding // microtubule plus-end binding // microtubule plus-end binding // actin binding // actin binding // zinc ion binding // myosin binding // Rab GTPase binding // Rab GTPase binding // myosin V binding // myosin V binding // microtubule plus-end bi…	inferred from electronic annotation // not recorded // inferred from electronic annotation // not recorded // inferred from electronic annotation // not recorded // inferred from electronic annotation // not recorded // inferred from electronic annotation // not recorded // inferred from electronic annotation // not recorded // inferred from electronic annotation // not recorded // inferred from …	---	---	Pfam	IPR006788	Rab effector MyRIP/Melanophilin	main	5.63448	5.75733	5.07697	6.7766	7.82044	6.50388
10718954	Lilrb4	leukocyte immunoglobulin-like receptor, subfamily B, member 4	0.0027593	0.212	25.95	74.43	2.85714	up	NM_001013894 // ENSRNOT00000038898 // AY359280	RefSeq // ENSEMBL // GenBank	Rattus norvegicus leukocyte immunoglobulin-like receptor, subfamily B, member 4 (Lilrb4), mRNA. // cdna:known chromosome:Rnor_5.0:1:75149298:75154600:1 gene:ENSRNOG00000027811 gene_biotype:protein_coding transcript_biotype:protein_coding // Rattus norvegicus GP49B1 (Gp49b) mRNA, complete cds, alternatively spliced.	chr1	-	69165365	69170899	---	---	---	---	---	---	GO:0005515	protein binding	inferred from electronic annotation	---	---	---	---	---	main	4.98667	4.68267	4.45114	5.98253	7.01471	5.7092
10771998	RGD1559459	similar to Expressed sequence AI788959	0.0037376	0.247	9.09	26.09	2.85714	up	XM_003751344 // ENSRNOT00000065079 // GENSCAN00000046489	RefSeq // ENSEMBL // ENSEMBL	PREDICTED: Rattus norvegicus UDP-glucuronosyltransferase 2B31-like (RGD1559459), mRNA. // cdna:known chromosome:Rnor_5.0:14:22834704:22850105:1 gene:ENSRNOG00000042714 gene_biotype:protein_coding transcript_biotype:protein_coding // cdna:genscan chromosome:Rnor_5.0:14:22834704:22850105:1 transcript_biotype:protein_coding	chr14	+	22770804	22786094	GO:0008152 // GO:0008152 // GO:0005975 // GO:0030259	metabolic process // metabolic process // carbohydrate metabolic process // lipid glycosylation	inferred from electronic annotation // inferred from electronic annotation // inferred from electronic annotation // inferred from electronic annotation	---	---	---	GO:0016758 // GO:0016740 // GO:0016757 // GO:0016758 // GO:0030246 // GO:0016740 // GO:0016757	transferase activity, transferring hexosyl groups // transferase activity // transferase activity, transferring glycosyl groups // transferase activity, transferring hexosyl groups // carbohydrate binding // transferase activity // transferase activity, transferring glycosyl groups	inferred from electronic annotation // inferred from electronic annotation // inferred from electronic annotation // inferred from electronic annotation // inferred from electronic annotation // inferred from electronic annotation // inferred from electronic annotation	---	---	Pfam // Pfam	IPR002213 // IPR007235	UDP-glucuronosyl/UDP-glucosyltransferase // Glycosyl transferase, family 28, C-terminal	main	3.34223	3.27135	2.96626	5.55507	3.98516	4.62898
10832496	Susd2	sushi domain containing 2	0.0080862	0.312	440.84	1271.96	2.85714	up	NM_001106381 // ENSRNOT00000066773 // BC168843	RefSeq // ENSEMBL // GenBank	Rattus norvegicus sushi domain containing 2 (Susd2), mRNA. // cdna:known chromosome:Rnor_5.0:20:16153343:16160769:1 gene:ENSRNOG00000033389 gene_biotype:protein_coding transcript_biotype:protein_coding // Rattus norvegicus sushi domain containing 2, mRNA (cDNA clone MGC:189067 IMAGE:9089070), complete cds.	chr20	-	13435983	13442607	GO:0006955 // GO:0006955 // GO:0006955	immune response // immune response // immune response	inferred from electronic annotation // inferred from electronic annotation // inferred from electronic annotation	---	---	---	GO:0005044 // GO:0030247 // GO:0005044 // GO:0030247 // GO:0005044 // GO:0030247	scavenger receptor activity // polysaccharide binding // scavenger receptor activity // polysaccharide binding // scavenger receptor activity // polysaccharide binding	inferred from electronic annotation // inferred from electronic annotation // inferred from electronic annotation // inferred from electronic annotation // inferred from electronic annotation // inferred from electronic annotation	---	---	Pfam // Pfam // Pfam // Pfam	IPR000436 // IPR001212 // IPR001846 // IPR005533	Sushi/SCR/CCP // Somatomedin B domain // von Willebrand factor, type D domain // AMOP	main	9.75231	8.70283	7.92468	10.4915	10.1211	10.3787
10912439	Rbp1	retinol binding protein 1, cellular	0.0199399	0.395	657.2	1891.43	2.85714	up	ENSRNOT00000018622 // NM_012733 // M16459	ENSEMBL // RefSeq // GenBank	cdna:known chromosome:Rnor_5.0:8:105891148:105912684:1 gene:ENSRNOG00000013794 gene_biotype:protein_coding transcript_biotype:protein_coding // Rattus norvegicus retinol binding protein 1, cellular (Rbp1), mRNA. // Rat cellular retinol binding protein (CRBP) mRNA, complete cds.	chr8	+	103605870	103627390	GO:0002138 // GO:0030852 // GO:0030852 // GO:0033189 // GO:0033189 // GO:0042572 // GO:0042572 // GO:0042573 // GO:0042572 // GO:0042573 // GO:0006810 // GO:0002138 // GO:0030852 // GO:0030852 // GO:0033189 // GO:0033189 // GO:0042572 // GO:0042572 // GO:0042573 // GO:0006810 // GO:0042572 // GO:0042573 // GO:0002138 // GO:0030852 // GO:0030852 // GO:0033189 // GO:0033189 // GO:0042572 // GO:0042…	retinoic acid biosynthetic process // regulation of granulocyte differentiation // regulation of granulocyte differentiation // response to vitamin A // response to vitamin A // retinol metabolic process // retinol metabolic process // retinoic acid metabolic process // retinol metabolic process // retinoic acid metabolic process // transport // retinoic acid biosynthetic process // regulation of…	inferred from expression pattern // inferred from electronic annotation // not recorded // inferred from electronic annotation // not recorded // inferred from direct assay // not recorded // not recorded // inferred from electronic annotation // inferred from electronic annotation // inferred from electronic annotation // inferred from expression pattern // inferred from electronic annotation //…	GO:0005829 // GO:0044297 // GO:0005737 // GO:0005829 // GO:0044297 // GO:0005737 // GO:0005829 // GO:0044297 // GO:0005737	cytosol // cell body // cytoplasm // cytosol // cell body // cytoplasm // cytosol // cell body // cytoplasm	inferred from direct assay // inferred from direct assay // inferred from electronic annotation // inferred from direct assay // inferred from direct assay // inferred from electronic annotation // inferred from direct assay // inferred from direct assay // inferred from electronic annotation	GO:0005215 // GO:0016918 // GO:0019841 // GO:0008289 // GO:0019841 // GO:0005215 // GO:0016918 // GO:0019841 // GO:0008289 // GO:0019841 // GO:0005215 // GO:0016918 // GO:0019841 // GO:0008289 // GO:0019841	transporter activity // retinal binding // retinol binding // lipid binding // retinol binding // transporter activity // retinal binding // retinol binding // lipid binding // retinol binding // transporter activity // retinal binding // retinol binding // lipid binding // retinol binding	inferred from electronic annotation // inferred from electronic annotation // inferred from direct assay // inferred from electronic annotation // inferred from electronic annotation // inferred from electronic annotation // inferred from electronic annotation // inferred from direct assay // inferred from electronic annotation // inferred from electronic annotation // inferred from electronic an…	---	---	Pfam	IPR000566	Lipocalin/cytosolic fatty-acid binding protein domain	main	10.3303	9.59512	8.18265	11.2383	10.5278	10.9426
10721268	Siglece	sialic acid binding Ig-like lectin E	0.006473	0.286	11.07	30.73	2.77778	up	ENSRNOT00000048947	ENSEMBL	cdna:known_by_projection chromosome:Rnor_5.0:1:100647307:100655905:-1 gene:ENSRNOG00000022640 gene_biotype:protein_coding transcript_biotype:protein_coding	chr1	-	94062590	94071187	GO:0007155	cell adhesion	inferred from electronic annotation	---	---	---	GO:0005515 // GO:0004872 // GO:0005057 // GO:0048029	protein binding // receptor activity // receptor signaling protein activity // monosaccharide binding	inferred from electronic annotation // inferred from electronic annotation // inferred from electronic annotation // inferred from electronic annotation	---	---	Pfam	IPR013106	Immunoglobulin V-set	main	3.31946	3.48275	3.63116	4.14112	5.83735	4.89864
10734882	Per1	period circadian clock 1	0.0002754	0.133	140.41	391.98	2.77778	up	NM_001034125 // ENSRNOT00000057136 // AY903228	RefSeq // ENSEMBL // GenBank	Rattus norvegicus period circadian clock 1 (Per1), mRNA. // cdna:known chromosome:Rnor_5.0:10:55430184:55439080:1 gene:ENSRNOG00000007387 gene_biotype:protein_coding transcript_biotype:protein_coding // Rattus norvegicus strain BN/Cub period-like protein 1 (Per1) mRNA, complete cds.	chr10	+	55858223	55869279	GO:0000122 // GO:0000122 // GO:0006351 // GO:0007623 // GO:0007623 // GO:0009416 // GO:0032922 // GO:0032922 // GO:0045892 // GO:0045892 // GO:0006355 // GO:0007165 // GO:0045892 // GO:0048511 // GO:0000122 // GO:0000122 // GO:0006351 // GO:0007623 // GO:0007623 // GO:0009416 // GO:0032922 // GO:0032922 // GO:0045892 // GO:0045892 // GO:0007165 // GO:0006355 // GO:0045892 // GO:0048511 // GO:0000…	negative regulation of transcription from RNA polymerase II promoter // negative regulation of transcription from RNA polymerase II promoter // transcription, DNA-dependent // circadian rhythm // circadian rhythm // response to light stimulus // circadian regulation of gene expression // circadian regulation of gene expression // negative regulation of transcription, DNA-dependent // negative reg…	inferred from electronic annotation // not recorded // inferred from electronic annotation // inferred from expression pattern // inferred from mutant phenotype // inferred from electronic annotation // inferred from electronic annotation // not recorded // not recorded // inferred from sequence or structural similarity // inferred from electronic annotation // inferred from electronic annotation…	GO:0005634 // GO:0005634 // GO:0005737 // GO:0005634 // GO:0005634 // GO:0005737 // GO:0005634 // GO:0005634 // GO:0005737	nucleus // nucleus // cytoplasm // nucleus // nucleus // cytoplasm // nucleus // nucleus // cytoplasm	inferred from electronic annotation // not recorded // inferred from electronic annotation // inferred from electronic annotation // not recorded // inferred from electronic annotation // inferred from electronic annotation // not recorded // inferred from electronic annotation	GO:0000978 // GO:0000978 // GO:0000988 // GO:0000988 // GO:0004871 // GO:0005515 // GO:0070888 // GO:0070888 // GO:0000978 // GO:0000978 // GO:0000988 // GO:0000988 // GO:0004871 // GO:0005515 // GO:0070888 // GO:0070888 // GO:0005515 // GO:0000978 // GO:0000978 // GO:0000988 // GO:0000988 // GO:0004871 // GO:0005515 // GO:0070888 // GO:0070888	RNA polymerase II core promoter proximal region sequence-specific DNA binding // RNA polymerase II core promoter proximal region sequence-specific DNA binding // protein binding transcription factor activity // protein binding transcription factor activity // signal transducer activity // protein binding // E-box binding // E-box binding // RNA polymerase II core promoter proximal region sequence…	inferred from electronic annotation // not recorded // inferred from electronic annotation // not recorded // inferred from electronic annotation // inferred from physical interaction // inferred from electronic annotation // not recorded // inferred from electronic annotation // not recorded // inferred from electronic annotation // not recorded // inferred from electronic annotation // inferred…	---	---	Pfam // Pfam	IPR013655 // IPR022728	PAS fold-3 // Period circadian-like, C-terminal	main	6.81093	7.68612	6.93091	8.60867	8.63658	8.65156
10803991	Cd14	CD14 molecule	0.0166426	0.387	126.48	351.87	2.77778	up	NM_021744 // ENSRNOT00000023977 // BC061733	RefSeq // ENSEMBL // GenBank	Rattus norvegicus CD14 molecule (Cd14), mRNA. // cdna:known chromosome:Rnor_5.0:18:29265353:29266946:-1 gene:ENSRNOG00000017819 gene_biotype:protein_coding transcript_biotype:protein_coding // Rattus norvegicus CD14 molecule, mRNA (cDNA clone MGC:72467 IMAGE:5598794), complete cds.	chr18	-	29374590	29376328	GO:0002237 // GO:0006950 // GO:0006954 // GO:0009408 // GO:0032026 // GO:0032496 // GO:0032760 // GO:0032760 // GO:0034612 // GO:0045087 // GO:0045471 // GO:0045807 // GO:0045807 // GO:0050715 // GO:0071222 // GO:0071222 // GO:0071223 // GO:0071223 // GO:0002237 // GO:0006954 // GO:0071222 // GO:0002237 // GO:0006950 // GO:0006954 // GO:0009408 // GO:0032026 // GO:0032496 // GO:0032760 // GO:0032…	response to molecule of bacterial origin // response to stress // inflammatory response // response to heat // response to magnesium ion // response to lipopolysaccharide // positive regulation of tumor necrosis factor production // positive regulation of tumor necrosis factor production // response to tumor necrosis factor // innate immune response // response to ethanol // positive regulation o…	not recorded // inferred from expression pattern // inferred from direct assay // inferred from expression pattern // inferred from expression pattern // inferred from expression pattern // inferred from electronic annotation // not recorded // inferred from mutant phenotype // inferred from electronic annotation // inferred from expression pattern // inferred from electronic annotation // not re…	GO:0005615 // GO:0005886 // GO:0009986 // GO:0031225 // GO:0045121 // GO:0045121 // GO:0046696 // GO:0005886 // GO:0016020 // GO:0005615 // GO:0005886 // GO:0009986 // GO:0031225 // GO:0045121 // GO:0045121 // GO:0046696 // GO:0005886 // GO:0016020 // GO:0005615 // GO:0005886 // GO:0009986 // GO:0031225 // GO:0045121 // GO:0045121 // GO:0046696 // GO:0005886 // GO:0016020	extracellular space // plasma membrane // cell surface // anchored to membrane // membrane raft // membrane raft // lipopolysaccharide receptor complex // plasma membrane // membrane // extracellular space // plasma membrane // cell surface // anchored to membrane // membrane raft // membrane raft // lipopolysaccharide receptor complex // plasma membrane // membrane // extracellular space // plas…	inferred from direct assay // inferred from direct assay // inferred from direct assay // inferred from electronic annotation // inferred from electronic annotation // not recorded // traceable author statement // inferred from electronic annotation // inferred from electronic annotation // inferred from direct assay // inferred from direct assay // inferred from direct assay // inferred from ele…	GO:0001530 // GO:0001530 // GO:0005515 // GO:0070891 // GO:0070891 // GO:0001530 // GO:0001530 // GO:0005515 // GO:0070891 // GO:0070891 // GO:0001530 // GO:0001530 // GO:0005515 // GO:0070891 // GO:0070891	lipopolysaccharide binding // lipopolysaccharide binding // protein binding // lipoteichoic acid binding // lipoteichoic acid binding // lipopolysaccharide binding // lipopolysaccharide binding // protein binding // lipoteichoic acid binding // lipoteichoic acid binding // lipopolysaccharide binding // lipopolysaccharide binding // protein binding // lipoteichoic acid binding // lipoteichoic acid…	inferred from electronic annotation // not recorded // inferred from physical interaction // inferred from electronic annotation // not recorded // inferred from electronic annotation // not recorded // inferred from physical interaction // inferred from electronic annotation // not recorded // inferred from electronic annotation // not recorded // inferred from physical interaction // inferred f…	---	---	---	---	---	main	7.35295	7.17433	6.44843	7.88657	9.55979	7.9832
10817759	Hmgcs2	3-hydroxy-3-methylglutaryl-CoA synthase 2 (mitochondrial)	0.0297728	0.434	80.16	220.3	2.77778	up	NM_173094 // ENSRNOT00000026121 // M33648	RefSeq // ENSEMBL // GenBank	Rattus norvegicus 3-hydroxy-3-methylglutaryl-CoA synthase 2 (mitochondrial) (Hmgcs2), nuclear gene encoding mitochondrial protein, mRNA. // cdna:known chromosome:Rnor_5.0:2:219928551:219954859:1 gene:ENSRNOG00000019120 gene_biotype:protein_coding transcript_biotype:protein_coding // Rat mitochondrial 3-hydroxy-3-methylglutaryl-CoA synthase mRNA, complete cds.	chr2	+	193128730	193143110	GO:0001822 // GO:0001889 // GO:0006695 // GO:0007420 // GO:0007494 // GO:0007584 // GO:0008299 // GO:0009266 // GO:0009617 // GO:0010038 // GO:0014070 // GO:0030324 // GO:0032868 // GO:0032869 // GO:0032870 // GO:0033555 // GO:0033574 // GO:0033762 // GO:0034014 // GO:0034284 // GO:0034696 // GO:0042493 // GO:0042594 // GO:0043434 // GO:0045471 // GO:0046951 // GO:0046951 // GO:0051384 // GO:0051…	kidney development // liver development // cholesterol biosynthetic process // brain development // midgut development // response to nutrient // isoprenoid biosynthetic process // response to temperature stimulus // response to bacterium // response to metal ion // response to organic cyclic compound // lung development // response to insulin stimulus // cellular response to insulin stimulus // …	inferred from expression pattern // inferred from expression pattern // inferred from electronic annotation // inferred from expression pattern // inferred from expression pattern // inferred from expression pattern // inferred from electronic annotation // inferred from expression pattern // inferred from expression pattern // inferred from expression pattern // inferred from expression pattern …	GO:0005739 // GO:0005739 // GO:0005743 // GO:0005743 // GO:0005759 // GO:0005739 // GO:0005739 // GO:0005739 // GO:0005743 // GO:0005743 // GO:0005759 // GO:0005739 // GO:0005739 // GO:0005739 // GO:0005743 // GO:0005743 // GO:0005759 // GO:0005739	mitochondrion // mitochondrion // mitochondrial inner membrane // mitochondrial inner membrane // mitochondrial matrix // mitochondrion // mitochondrion // mitochondrion // mitochondrial inner membrane // mitochondrial inner membrane // mitochondrial matrix // mitochondrion // mitochondrion // mitochondrion // mitochondrial inner membrane // mitochondrial inner membrane // mitochondrial matrix //…	not recorded // traceable author statement // inferred from electronic annotation // not recorded // inferred from direct assay // inferred from electronic annotation // not recorded // traceable author statement // inferred from electronic annotation // not recorded // inferred from direct assay // inferred from electronic annotation // not recorded // traceable author statement // inferred from…	GO:0004421 // GO:0004421 // GO:0004421 // GO:0003824 // GO:0016740 // GO:0004421 // GO:0004421 // GO:0004421 // GO:0003824 // GO:0016740 // GO:0004421 // GO:0004421 // GO:0004421 // GO:0003824 // GO:0016740	hydroxymethylglutaryl-CoA synthase activity // hydroxymethylglutaryl-CoA synthase activity // hydroxymethylglutaryl-CoA synthase activity // catalytic activity // transferase activity // hydroxymethylglutaryl-CoA synthase activity // hydroxymethylglutaryl-CoA synthase activity // hydroxymethylglutaryl-CoA synthase activity // catalytic activity // transferase activity // hydroxymethylglutaryl-CoA…	inferred from direct assay // inferred from electronic annotation // traceable author statement // inferred from electronic annotation // inferred from electronic annotation // inferred from direct assay // inferred from electronic annotation // traceable author statement // inferred from electronic annotation // inferred from electronic annotation // inferred from direct assay // inferred from e…	GenMAPP // GenMAPP // GenMAPP	Synthesis_and_Degradation_of_Ketone_Bodies_KEGG // Synthesis_and_Degradation_of_Ketone_Bodies_KEGG // Synthesis_and_Degradation_of_Ketone_Bodies_KEGG	Pfam // Pfam	IPR013528 // IPR013746	Hydroxymethylglutaryl-coenzyme A synthase, N-terminal // Hydroxymethylglutaryl-coenzyme A synthase C-terminal	main	6.35934	6.12286	6.51999	9.1506	7.45946	6.79283
10819013	Cfi	complement factor I	0.0195528	0.395	47.14	129.75	2.77778	up	NM_024157 // ENSRNOT00000034706 // BC089798	RefSeq // ENSEMBL // GenBank	Rattus norvegicus complement factor I (Cfi), mRNA. // cdna:known chromosome:Rnor_5.0:2:74628926:74634495:-1 gene:ENSRNOG00000023599 gene_biotype:protein_coding transcript_biotype:protein_coding // Rattus norvegicus complement factor I, mRNA (cDNA clone MGC:108679 IMAGE:7321559), complete cds.	chr2	+	227281621	227324914	GO:0006508 // GO:0006958 // GO:0045087 // GO:0006508 // GO:0006958 // GO:0045087 // GO:0006508 // GO:0006958 // GO:0045087	proteolysis // complement activation, classical pathway // innate immune response // proteolysis // complement activation, classical pathway // innate immune response // proteolysis // complement activation, classical pathway // innate immune response	inferred from electronic annotation // inferred from electronic annotation // inferred from electronic annotation // inferred from electronic annotation // inferred from electronic annotation // inferred from electronic annotation // inferred from electronic annotation // inferred from electronic annotation // inferred from electronic annotation	GO:0005615 // GO:0016020 // GO:0005576 // GO:0005615 // GO:0016020 // GO:0005576 // GO:0005615 // GO:0016020 // GO:0005576	extracellular space // membrane // extracellular region // extracellular space // membrane // extracellular region // extracellular space // membrane // extracellular region	inferred from electronic annotation // inferred from electronic annotation // inferred from electronic annotation // inferred from electronic annotation // inferred from electronic annotation // inferred from electronic annotation // inferred from electronic annotation // inferred from electronic annotation // inferred from electronic annotation	GO:0004252 // GO:0005044 // GO:0046872 // GO:0003824 // GO:0008233 // GO:0008236 // GO:0016787 // GO:0004252 // GO:0005044 // GO:0046872 // GO:0003824 // GO:0008233 // GO:0008236 // GO:0016787 // GO:0004252 // GO:0005044 // GO:0046872 // GO:0003824 // GO:0008233 // GO:0008236 // GO:0016787	serine-type endopeptidase activity // scavenger receptor activity // metal ion binding // catalytic activity // peptidase activity // serine-type peptidase activity // hydrolase activity // serine-type endopeptidase activity // scavenger receptor activity // metal ion binding // catalytic activity // peptidase activity // serine-type peptidase activity // hydrolase activity // serine-type endopep…	inferred from electronic annotation // inferred from electronic annotation // inferred from electronic annotation // inferred from electronic annotation // inferred from electronic annotation // inferred from electronic annotation // inferred from electronic annotation // inferred from electronic annotation // inferred from electronic annotation // inferred from electronic annotation // inferred …	---	---	Pfam	IPR001254	Peptidase S1	main	6.57206	5.36111	4.77127	6.95886	7.65032	6.50243
10717295	Vnn1	vanin 1	0.0017917	0.199	150.2	406.37	2.7027	up	NM_001025623 // ENSRNOT00000021694 // BC098934	RefSeq // ENSEMBL // GenBank	Rattus norvegicus vanin 1 (Vnn1), mRNA. // cdna:known chromosome:Rnor_5.0:1:24089368:24099667:-1 gene:ENSRNOG00000016219 gene_biotype:protein_coding transcript_biotype:protein_coding // Rattus norvegicus vanin 1, mRNA (cDNA clone MGC:114385 IMAGE:7441890), complete cds.	chr1	-	22087290	22097592	GO:0002526 // GO:0002526 // GO:0002544 // GO:0002544 // GO:0006954 // GO:0015939 // GO:0015939 // GO:0016337 // GO:0016337 // GO:0033089 // GO:0033089 // GO:0043066 // GO:0043066 // GO:0045087 // GO:0045087 // GO:0006807 // GO:0006954 // GO:0008150 // GO:0002526 // GO:0002526 // GO:0002544 // GO:0002544 // GO:0006954 // GO:0015939 // GO:0015939 // GO:0016337 // GO:0016337 // GO:0033089 // GO:0033…	acute inflammatory response // acute inflammatory response // chronic inflammatory response // chronic inflammatory response // inflammatory response // pantothenate metabolic process // pantothenate metabolic process // cell-cell adhesion // cell-cell adhesion // positive regulation of T cell differentiation in thymus // positive regulation of T cell differentiation in thymus // negative regulat…	inferred from electronic annotation // not recorded // inferred from electronic annotation // not recorded // not recorded // inferred from electronic annotation // not recorded // inferred from electronic annotation // not recorded // inferred from electronic annotation // not recorded // inferred from electronic annotation // not recorded // inferred from electronic annotation // not recorded /…	GO:0005615 // GO:0005575 // GO:0005615 // GO:0005575 // GO:0005615 // GO:0005575	extracellular space // cellular_component // extracellular space // cellular_component // extracellular space // cellular_component	not recorded // no biological data available // not recorded // no biological data available // not recorded // no biological data available	GO:0017159 // GO:0017159 // GO:0003674 // GO:0016810 // GO:0016811 // GO:0017159 // GO:0017159 // GO:0003674 // GO:0016810 // GO:0016811 // GO:0017159 // GO:0017159 // GO:0003674 // GO:0016810 // GO:0016811	pantetheine hydrolase activity // pantetheine hydrolase activity // molecular_function // hydrolase activity, acting on carbon-nitrogen (but not peptide) bonds // hydrolase activity, acting on carbon-nitrogen (but not peptide) bonds, in linear amides // pantetheine hydrolase activity // pantetheine hydrolase activity // molecular_function // hydrolase activity, acting on carbon-nitrogen (but not …	inferred from electronic annotation // not recorded // no biological data available // inferred from electronic annotation // inferred from electronic annotation // inferred from electronic annotation // not recorded // no biological data available // inferred from electronic annotation // inferred from electronic annotation // inferred from electronic annotation // not recorded // no biological …	---	---	Pfam	IPR003010	Carbon-nitrogen hydrolase	main	7.86403	7.20526	6.65046	8.91842	8.49652	8.63788
10755148	Fetub	fetuin B	0.0006697	0.161	110.61	295.11	2.7027	up	ENSRNOT00000046199 // NM_053348 // FQ219513 // ENSRNOT00000048739	ENSEMBL // RefSeq // GenBank // ENSEMBL	cdna:known chromosome:Rnor_5.0:11:84745603:84754149:-1 gene:ENSRNOG00000001806 gene_biotype:protein_coding transcript_biotype:protein_coding // Rattus norvegicus fetuin B (Fetub), mRNA. // Rattus norvegicus TL0ABA44YM04 mRNA sequence. // cdna:known chromosome:Rnor_5.0:11:84745622:84756917:-1 gene:ENSRNOG00000001806 gene_biotype:protein_coding transcript_biotype:protein_coding	chr11	-	80276850	80287446	GO:0007338 // GO:0007338 // GO:0007339 // GO:0010466 // GO:0010951 // GO:0007338 // GO:0007338 // GO:0007339 // GO:0010466 // GO:0010951 // GO:0007338 // GO:0007338 // GO:0007339 // GO:0010466 // GO:0010951 // GO:0007338 // GO:0007338 // GO:0007339 // GO:0010466 // GO:0010951	single fertilization // single fertilization // binding of sperm to zona pellucida // negative regulation of peptidase activity // negative regulation of endopeptidase activity // single fertilization // single fertilization // binding of sperm to zona pellucida // negative regulation of peptidase activity // negative regulation of endopeptidase activity // single fertilization // single fertiliz…	inferred from electronic annotation // inferred from sequence or structural similarity // inferred from sequence or structural similarity // inferred from electronic annotation // inferred from sequence or structural similarity // inferred from electronic annotation // inferred from sequence or structural similarity // inferred from sequence or structural similarity // inferred from electronic an…	GO:0005615 // GO:0005576 // GO:0005615 // GO:0005576 // GO:0005615 // GO:0005576 // GO:0005615 // GO:0005576	extracellular space // extracellular region // extracellular space // extracellular region // extracellular space // extracellular region // extracellular space // extracellular region	inferred from electronic annotation // inferred from electronic annotation // inferred from electronic annotation // inferred from electronic annotation // inferred from electronic annotation // inferred from electronic annotation // inferred from electronic annotation // inferred from electronic annotation	GO:0004869 // GO:0004857 // GO:0008191 // GO:0008191 // GO:0030414 // GO:0004869 // GO:0004857 // GO:0008191 // GO:0008191 // GO:0030414 // GO:0004869 // GO:0004857 // GO:0008191 // GO:0008191 // GO:0030414 // GO:0004869 // GO:0004857 // GO:0008191 // GO:0008191 // GO:0030414	cysteine-type endopeptidase inhibitor activity // enzyme inhibitor activity // metalloendopeptidase inhibitor activity // metalloendopeptidase inhibitor activity // peptidase inhibitor activity // cysteine-type endopeptidase inhibitor activity // enzyme inhibitor activity // metalloendopeptidase inhibitor activity // metalloendopeptidase inhibitor activity // peptidase inhibitor activity // cyste…	inferred from electronic annotation // inferred from electronic annotation // inferred from electronic annotation // inferred from sequence or structural similarity // inferred from electronic annotation // inferred from electronic annotation // inferred from electronic annotation // inferred from electronic annotation // inferred from sequence or structural similarity // inferred from electronic…	---	---	Pfam // Pfam	IPR000010 // IPR000010	Proteinase inhibitor I25, cystatin // Proteinase inhibitor I25, cystatin	main	7.34376	6.45694	6.59493	8.18038	8.00306	8.4848
10768346	Rgs1	regulator of G-protein signaling 1	0.0141132	0.363	52.91	142.05	2.7027	up	NM_019336 // ENSRNOT00000005251 // BC098681	RefSeq // ENSEMBL // GenBank	Rattus norvegicus regulator of G-protein signaling 1 (Rgs1), mRNA. // cdna:known chromosome:Rnor_5.0:13:66051576:66055901:-1 gene:ENSRNOG00000003895 gene_biotype:protein_coding transcript_biotype:protein_coding // Rattus norvegicus regulator of G-protein signaling 1, mRNA (cDNA clone MGC:112645 IMAGE:7385088), complete cds.	chr13	-	58121180	58125514	GO:0038032 // GO:0043547 // GO:0009968 // GO:0043547 // GO:0038032 // GO:0043547 // GO:0043547 // GO:0009968 // GO:0038032 // GO:0043547 // GO:0009968 // GO:0043547	termination of G-protein coupled receptor signaling pathway // positive regulation of GTPase activity // negative regulation of signal transduction // positive regulation of GTPase activity // termination of G-protein coupled receptor signaling pathway // positive regulation of GTPase activity // positive regulation of GTPase activity // negative regulation of signal transduction // termination o…	inferred from electronic annotation // not recorded // inferred from electronic annotation // --- // inferred from electronic annotation // not recorded // --- // inferred from electronic annotation // inferred from electronic annotation // not recorded // inferred from electronic annotation // ---	GO:0005737 // GO:0005886 // GO:0005737 // GO:0005886 // GO:0005737 // GO:0005886 // GO:0005886 // GO:0005737 // GO:0005737 // GO:0005886 // GO:0005737 // GO:0005886	cytoplasm // plasma membrane // cytoplasm // plasma membrane // cytoplasm // plasma membrane // plasma membrane // cytoplasm // cytoplasm // plasma membrane // cytoplasm // plasma membrane	not recorded // not recorded // --- // --- // not recorded // not recorded // --- // --- // not recorded // not recorded // --- // ---	GO:0005096 // GO:0005096 // GO:0005096 // GO:0005096 // GO:0005096 // GO:0005096	GTPase activator activity // GTPase activator activity // GTPase activator activity // GTPase activator activity // GTPase activator activity // GTPase activator activity	not recorded // --- // not recorded // --- // not recorded // ---	GenMAPP // GenMAPP // GenMAPP // GenMAPP // GenMAPP // GenMAPP	Calcium_regulation_in_cardiac_cells // Smooth_muscle_contraction // Calcium_regulation_in_cardiac_cells // Smooth_muscle_contraction // Calcium_regulation_in_cardiac_cells // Smooth_muscle_contraction	Pfam	IPR000342	Regulator of G protein signalling	main	5.27942	6.65946	5.26541	6.7724	7.82472	6.90664
10775896	Cxcl2	chemokine (C-X-C motif) ligand 2	0.0111166	0.339	10.35	27.72	2.7027	up	ENSRNOT00000003745 // NM_053647 // U45965	ENSEMBL // RefSeq // GenBank	cdna:known chromosome:Rnor_5.0:14:18640312:18642357:-1 gene:ENSRNOG00000002792 gene_biotype:protein_coding transcript_biotype:protein_coding // Rattus norvegicus chemokine (C-X-C motif) ligand 2 (Cxcl2), mRNA. // Rattus norvegicus macrophage inflammatory protein-2 precursor, mRNA, complete cds.	chr14	-	18677129	18679175	GO:0001975 // GO:0002237 // GO:0006954 // GO:0006955 // GO:0007204 // GO:0009408 // GO:0010332 // GO:0030593 // GO:0030595 // GO:0032355 // GO:0042060 // GO:0051384 // GO:0070997 // GO:0071222 // GO:0071347 // GO:0002237 // GO:0006935 // GO:0001975 // GO:0002237 // GO:0006954 // GO:0006955 // GO:0007204 // GO:0009408 // GO:0010332 // GO:0030593 // GO:0030595 // GO:0032355 // GO:0042060 // GO:0051…	response to amphetamine // response to molecule of bacterial origin // inflammatory response // immune response // elevation of cytosolic calcium ion concentration // response to heat // response to gamma radiation // neutrophil chemotaxis // leukocyte chemotaxis // response to estradiol stimulus // wound healing // response to glucocorticoid stimulus // neuron death // cellular response to lipop…	inferred from expression pattern // not recorded // inferred from electronic annotation // inferred from electronic annotation // inferred from direct assay // inferred from expression pattern // inferred from expression pattern // inferred from mutant phenotype // inferred from mutant phenotype // inferred from expression pattern // inferred from expression pattern // inferred from expression pa…	GO:0005615 // GO:0005615 // GO:0005576 // GO:0005615 // GO:0005615 // GO:0005615 // GO:0005576 // GO:0005615 // GO:0005615 // GO:0005615 // GO:0005576 // GO:0005615	extracellular space // extracellular space // extracellular region // extracellular space // extracellular space // extracellular space // extracellular region // extracellular space // extracellular space // extracellular space // extracellular region // extracellular space	inferred from direct assay // not recorded // inferred from electronic annotation // inferred from electronic annotation // inferred from direct assay // not recorded // inferred from electronic annotation // inferred from electronic annotation // inferred from direct assay // not recorded // inferred from electronic annotation // inferred from electronic annotation	GO:0008009 // GO:0008009 // GO:0005125 // GO:0008009 // GO:0008009 // GO:0008009 // GO:0005125 // GO:0008009 // GO:0008009 // GO:0008009 // GO:0005125 // GO:0008009	chemokine activity // chemokine activity // cytokine activity // chemokine activity // chemokine activity // chemokine activity // cytokine activity // chemokine activity // chemokine activity // chemokine activity // cytokine activity // chemokine activity	inferred from direct assay // traceable author statement // inferred from electronic annotation // inferred from electronic annotation // inferred from direct assay // traceable author statement // inferred from electronic annotation // inferred from electronic annotation // inferred from direct assay // traceable author statement // inferred from electronic annotation // inferred from electronic…	---	---	Pfam	IPR001811	Chemokine interleukin-8-like domain	main	3.60818	3.09633	3.43876	3.81458	5.02337	5.5932
10815281	Ccrn4l	CCR4 carbon catabolite repression 4-like (S. cerevisiae)	0.0052898	0.265	58.41	157.08	2.7027	up	NM_138526 // ENSRNOT00000014348	RefSeq // ENSEMBL	Rattus norvegicus CCR4 carbon catabolite repression 4-like (S. cerevisiae) (Ccrn4l), mRNA. // cdna:known chromosome:Rnor_5.0:2:159759666:159779874:1 gene:ENSRNOG00000010799 gene_biotype:protein_coding transcript_biotype:protein_coding	chr2	+	140120535	140140515	GO:0000290 // GO:0000290 // GO:0033962 // GO:0033962 // GO:0048511 // GO:0000290 // GO:0000290 // GO:0033962 // GO:0033962 // GO:0048511	deadenylation-dependent decapping of nuclear-transcribed mRNA // deadenylation-dependent decapping of nuclear-transcribed mRNA // cytoplasmic mRNA processing body assembly // cytoplasmic mRNA processing body assembly // rhythmic process // deadenylation-dependent decapping of nuclear-transcribed mRNA // deadenylation-dependent decapping of nuclear-transcribed mRNA // cytoplasmic mRNA processing b…	inferred from electronic annotation // not recorded // inferred from electronic annotation // not recorded // inferred from electronic annotation // inferred from electronic annotation // not recorded // inferred from electronic annotation // not recorded // inferred from electronic annotation	GO:0000932 // GO:0000932 // GO:0000932 // GO:0000932	cytoplasmic mRNA processing body // cytoplasmic mRNA processing body // cytoplasmic mRNA processing body // cytoplasmic mRNA processing body	inferred from electronic annotation // not recorded // inferred from electronic annotation // not recorded	GO:0005515	protein binding	inferred from electronic annotation	---	---	Pfam	IPR005135	Endonuclease/exonuclease/phosphatase	main	5.03777	6.05938	6.53484	6.96079	7.43386	7.54422
10816144	Sfrp2	secreted frizzled-related protein 2	0.0348006	0.449	65.57	176.58	2.7027	up	NM_001100700 // ENSRNOT00000012658 // BC161900	RefSeq // ENSEMBL // GenBank	Rattus norvegicus secreted frizzled-related protein 2 (Sfrp2), mRNA. // cdna:known chromosome:Rnor_5.0:2:202136233:202143777:1 gene:ENSRNOG00000009465 gene_biotype:protein_coding transcript_biotype:protein_coding // Rattus norvegicus secreted frizzled-related protein 2, mRNA (cDNA clone MGC:187620 IMAGE:8367121), complete cds.	chr2	+	175479310	175486882	GO:0001569 // GO:0001569 // GO:0001756 // GO:0001843 // GO:0001843 // GO:0001944 // GO:0002063 // GO:0002063 // GO:0003151 // GO:0003151 // GO:0003214 // GO:0003214 // GO:0006915 // GO:0007420 // GO:0007584 // GO:0008219 // GO:0008284 // GO:0008284 // GO:0008285 // GO:0008406 // GO:0008584 // GO:0008584 // GO:0009790 // GO:0009952 // GO:0010629 // GO:0010667 // GO:0010667 // GO:0010719 // GO:0010…	patterning of blood vessels // patterning of blood vessels // somitogenesis // neural tube closure // neural tube closure // vasculature development // chondrocyte development // chondrocyte development // outflow tract morphogenesis // outflow tract morphogenesis // cardiac left ventricle morphogenesis // cardiac left ventricle morphogenesis // apoptotic process // brain development // response …	inferred from electronic annotation // not recorded // not recorded // inferred from electronic annotation // not recorded // not recorded // inferred from electronic annotation // not recorded // inferred from electronic annotation // not recorded // inferred from electronic annotation // not recorded // not recorded // not recorded // inferred from expression pattern // not recorded // inferred…	GO:0005615 // GO:0005615 // GO:0005737 // GO:0005886 // GO:0005575 // GO:0005576 // GO:0005737 // GO:0005886 // GO:0042995 // GO:0005615 // GO:0005615 // GO:0005737 // GO:0005886 // GO:0005576 // GO:0005575 // GO:0005737 // GO:0005886 // GO:0042995 // GO:0005615 // GO:0005615 // GO:0005737 // GO:0005886 // GO:0005575 // GO:0005576 // GO:0005737 // GO:0005886 // GO:0042995	extracellular space // extracellular space // cytoplasm // plasma membrane // cellular_component // extracellular region // cytoplasm // plasma membrane // cell projection // extracellular space // extracellular space // cytoplasm // plasma membrane // extracellular region // cellular_component // cytoplasm // plasma membrane // cell projection // extracellular space // extracellular space // cyt…	inferred from electronic annotation // not recorded // not recorded // not recorded // no biological data available // inferred from electronic annotation // --- // --- // --- // inferred from electronic annotation // not recorded // not recorded // not recorded // inferred from electronic annotation // no biological data available // --- // --- // --- // inferred from electronic annotation // no…	GO:0010577 // GO:0010577 // GO:0017147 // GO:0030165 // GO:0042813 // GO:0048018 // GO:0048018 // GO:0061133 // GO:0061133 // GO:0003674 // GO:0017147 // GO:0017147 // GO:0030165 // GO:0042813 // GO:0010577 // GO:0010577 // GO:0017147 // GO:0030165 // GO:0042813 // GO:0048018 // GO:0048018 // GO:0061133 // GO:0061133 // GO:0005515 // GO:0017147 // GO:0003674 // GO:0017147 // GO:0030165 // GO:0042…	metalloenzyme activator activity // metalloenzyme activator activity // Wnt-protein binding // PDZ domain binding // Wnt-activated receptor activity // receptor agonist activity // receptor agonist activity // endopeptidase activator activity // endopeptidase activator activity // molecular_function // Wnt-protein binding // Wnt-protein binding // PDZ domain binding // Wnt-activated receptor acti…	inferred from electronic annotation // not recorded // not recorded // not recorded // not recorded // inferred from electronic annotation // not recorded // inferred from electronic annotation // not recorded // no biological data available // --- // inferred from electronic annotation // --- // --- // inferred from electronic annotation // not recorded // not recorded // not recorded // not rec…	---	---	Pfam // Pfam	IPR018933 // IPR020067	Netrin module, non-TIMP type // Frizzled domain	main	7.15424	5.97635	5.00187	8.16265	6.95835	7.3243
10853396	Steap1	six transmembrane epithelial antigen of the prostate 1	0.0089334	0.319	45.52	121.67	2.7027	up	NM_001106629 // ENSRNOT00000000018 // FQ220437	RefSeq // ENSEMBL // GenBank	Rattus norvegicus six transmembrane epithelial antigen of the prostate 1 (Steap1), mRNA. // cdna:known chromosome:Rnor_5.0:4:25343969:25354487:1 gene:ENSRNOG00000000017 gene_biotype:protein_coding transcript_biotype:protein_coding // Rattus norvegicus TL0ADA42YN21 mRNA sequence.	chr4	+	24966519	24973095	---	---	---	GO:0016021 // GO:0016021 // GO:0016021	integral to membrane // integral to membrane // integral to membrane	inferred from electronic annotation // inferred from electronic annotation // inferred from electronic annotation	---	---	---	---	---	Pfam	IPR013130	Ferric reductase transmembrane component-like domain	main	6.25047	5.7374	4.56454	6.90243	7.10886	6.82214
10908319	Icam1	intercellular adhesion molecule 1	0.0002983	0.133	131.6	356.37	2.7027	up	NM_012967 // ENSRNOT00000028066 // BC081837	RefSeq // ENSEMBL // GenBank	Rattus norvegicus intercellular adhesion molecule 1 (Icam1), mRNA. // cdna:known chromosome:Rnor_5.0:8:22092135:22103927:1 gene:ENSRNOG00000020679 gene_biotype:protein_coding transcript_biotype:protein_coding // Rattus norvegicus intercellular adhesion molecule 1, mRNA (cDNA clone MGC:93596 IMAGE:7122397), complete cds.	chr8	+	20040165	20051950	GO:0001541 // GO:0001666 // GO:0001975 // GO:0002291 // GO:0002291 // GO:0002457 // GO:0002457 // GO:0002693 // GO:0002693 // GO:0007155 // GO:0007159 // GO:0007159 // GO:0007569 // GO:0008360 // GO:0010212 // GO:0010477 // GO:0014070 // GO:0016337 // GO:0016337 // GO:0022614 // GO:0022614 // GO:0030155 // GO:0030155 // GO:0030838 // GO:0031669 // GO:0032321 // GO:0032496 // GO:0033627 // GO:0033…	ovarian follicle development // response to hypoxia // response to amphetamine // T cell activation via T cell receptor contact with antigen bound to MHC molecule on antigen presenting cell // T cell activation via T cell receptor contact with antigen bound to MHC molecule on antigen presenting cell // T cell antigen processing and presentation // T cell antigen processing and presentation // pos…	inferred from expression pattern // inferred from expression pattern // inferred from expression pattern // inferred from electronic annotation // not recorded // inferred from electronic annotation // not recorded // inferred from electronic annotation // not recorded // not recorded // inferred from electronic annotation // not recorded // inferred from expression pattern // inferred from mutan…	GO:0001772 // GO:0001772 // GO:0005615 // GO:0005615 // GO:0005886 // GO:0009897 // GO:0009897 // GO:0009986 // GO:0016021 // GO:0005615 // GO:0016020 // GO:0001772 // GO:0001772 // GO:0005615 // GO:0005615 // GO:0005886 // GO:0009897 // GO:0009897 // GO:0009986 // GO:0016021 // GO:0005615 // GO:0016020 // GO:0001772 // GO:0001772 // GO:0005615 // GO:0005615 // GO:0005886 // GO:0009897 // GO:0009…	immunological synapse // immunological synapse // extracellular space // extracellular space // plasma membrane // external side of plasma membrane // external side of plasma membrane // cell surface // integral to membrane // extracellular space // membrane // immunological synapse // immunological synapse // extracellular space // extracellular space // plasma membrane // external side of plasm…	inferred from electronic annotation // not recorded // inferred from direct assay // not recorded // inferred from direct assay // inferred from electronic annotation // not recorded // inferred from direct assay // inferred from electronic annotation // inferred from electronic annotation // inferred from electronic annotation // inferred from electronic annotation // not recorded // inferred fr…	GO:0005178 // GO:0005178 // GO:0032403 // GO:0005178 // GO:0005178 // GO:0005178 // GO:0032403 // GO:0005515 // GO:0005178 // GO:0043498 // GO:0005178 // GO:0005178 // GO:0032403 // GO:0005178	integrin binding // integrin binding // protein complex binding // integrin binding // integrin binding // integrin binding // protein complex binding // protein binding // integrin binding // cell surface binding // integrin binding // integrin binding // protein complex binding // integrin binding	inferred from mutant phenotype // not recorded // inferred from physical interaction // inferred from electronic annotation // inferred from mutant phenotype // not recorded // inferred from physical interaction // inferred from electronic annotation // inferred from electronic annotation // inferred from mutant phenotype // inferred from mutant phenotype // not recorded // inferred from physical…	---	---	Pfam	IPR013768	Intercellular adhesion molecule, N-terminal	main	6.98217	7.24623	6.91922	8.23909	8.97681	8.26868
10714128	Keg1	kidney expressed gene 1	0.0284362	0.428	448.71	1187.55	2.63158	up	ENSRNOT00000016593 // NM_134330 // AB019693	ENSEMBL // RefSeq // GenBank	cdna:known chromosome:Rnor_5.0:1:236673077:236706432:1 gene:ENSRNOG00000012387 gene_biotype:protein_coding transcript_biotype:protein_coding // Rattus norvegicus kidney expressed gene 1 (Keg1), mRNA. // Rattus norvegicus HP33 mRNA, complete cds.	chr1	+	215761469	215795659	---	---	---	GO:0005739 // GO:0005739 // GO:0005813 // GO:0005813 // GO:0005874 // GO:0005739 // GO:0005737 // GO:0005815 // GO:0005856 // GO:0005739 // GO:0005739 // GO:0005813 // GO:0005813 // GO:0005874 // GO:0005737 // GO:0005739 // GO:0005815 // GO:0005856 // GO:0005739 // GO:0005739 // GO:0005813 // GO:0005813 // GO:0005874 // GO:0005737 // GO:0005739 // GO:0005815 // GO:0005856	mitochondrion // mitochondrion // centrosome // centrosome // microtubule // mitochondrion // cytoplasm // microtubule organizing center // cytoskeleton // mitochondrion // mitochondrion // centrosome // centrosome // microtubule // cytoplasm // mitochondrion // microtubule organizing center // cytoskeleton // mitochondrion // mitochondrion // centrosome // centrosome // microtubule // cytoplasm …	not recorded // inferred from sequence or structural similarity // inferred from direct assay // non-traceable author statement // inferred from electronic annotation // inferred from electronic annotation // inferred from electronic annotation // inferred from electronic annotation // inferred from electronic annotation // not recorded // inferred from sequence or structural similarity // inferr…	GO:0043015 // GO:0047961 // GO:0016740 // GO:0016746 // GO:0043015 // GO:0047961 // GO:0016740 // GO:0016746 // GO:0043015 // GO:0047961 // GO:0016740 // GO:0016746	gamma-tubulin binding // glycine N-acyltransferase activity // transferase activity // transferase activity, transferring acyl groups // gamma-tubulin binding // glycine N-acyltransferase activity // transferase activity // transferase activity, transferring acyl groups // gamma-tubulin binding // glycine N-acyltransferase activity // transferase activity // transferase activity, transferring acy…	non-traceable author statement // inferred from electronic annotation // inferred from electronic annotation // inferred from electronic annotation // non-traceable author statement // inferred from electronic annotation // inferred from electronic annotation // inferred from electronic annotation // non-traceable author statement // inferred from electronic annotation // inferred from electronic…	---	---	Pfam // Pfam	IPR013652 // IPR015938	Glycine N-acyltransferase, C-terminal // Glycine N-acyltransferase, N-terminal	main	9.94939	8.84403	7.66301	10.3227	10.0923	10.2791
10753861	Retnlg	resistin-like gamma	0.0438756	0.486	13.62	35.86	2.63158	up	ENSRNOT00000002673 // NM_181625	ENSEMBL // RefSeq	cdna:known chromosome:Rnor_5.0:11:57674751:57676090:-1 gene:ENSRNOG00000001943 gene_biotype:protein_coding transcript_biotype:protein_coding // Rattus norvegicus resistin-like gamma (Retnlg), mRNA.	chr11	-	53174617	53175971	GO:0002408 // GO:0002408	myeloid dendritic cell chemotaxis // myeloid dendritic cell chemotaxis	not recorded // not recorded	GO:0005576 // GO:0005615 // GO:0005576 // GO:0005615	extracellular region // extracellular space // extracellular region // extracellular space	inferred from electronic annotation // not recorded // inferred from electronic annotation // not recorded	GO:0005125 // GO:0005179 // GO:0005125 // GO:0005179	cytokine activity // hormone activity // cytokine activity // hormone activity	non-traceable author statement // inferred from electronic annotation // non-traceable author statement // inferred from electronic annotation	---	---	Pfam	IPR009714	Resistin	main	4.56431	3.2834	3.48127	4.06173	6.23914	5.24535
10795616	Crem	cAMP responsive element modulator	0.0007173	0.161	84.68	224.77	2.63158	up	NM_001110860 // ENSRNOT00000068545 // NM_001271101 // NM_001271102 // NM_001271246 // NM_001271247 // ENSRNOT00000020204 // ENSRNOT00000020160 // NM_017334 // NM_001271245 // ENSRNOT00000074146 // NM_001271248 // BC078899 // ENSRNOT00000020012	RefSeq // ENSEMBL // RefSeq // RefSeq // RefSeq // RefSeq // ENSEMBL // ENSEMBL // RefSeq // RefSeq // ENSEMBL // RefSeq // GenBank // ENSEMBL	Rattus norvegicus cAMP responsive element modulator (Crem), transcript variant 3, mRNA. // cdna:known chromosome:Rnor_5.0:17:55055679:55121385:1 gene:ENSRNOG00000014900 gene_biotype:protein_coding transcript_biotype:protein_coding // Rattus norvegicus cAMP responsive element modulator (Crem), transcript variant 4, mRNA. // Rattus norvegicus cAMP responsive element modulator (Crem), transcript var…	chr17	+	62770632	62836488	GO:0006006 // GO:0006351 // GO:0006355 // GO:0006355 // GO:0006631 // GO:0006687 // GO:0006687 // GO:0007283 // GO:0019933 // GO:0042752 // GO:0045944 // GO:0045944 // GO:0048384 // GO:0006355 // GO:0007283 // GO:0006006 // GO:0006351 // GO:0006355 // GO:0006355 // GO:0006631 // GO:0006687 // GO:0006687 // GO:0007283 // GO:0019933 // GO:0042752 // GO:0045944 // GO:0045944 // GO:0048384 // GO:0006…	glucose metabolic process // transcription, DNA-dependent // regulation of transcription, DNA-dependent // regulation of transcription, DNA-dependent // fatty acid metabolic process // glycosphingolipid metabolic process // glycosphingolipid metabolic process // spermatogenesis // cAMP-mediated signaling // regulation of circadian rhythm // positive regulation of transcription from RNA polymerase…	inferred from expression pattern // inferred from electronic annotation // not recorded // traceable author statement // inferred from expression pattern // inferred from electronic annotation // not recorded // not recorded // traceable author statement // inferred from expression pattern // inferred from electronic annotation // not recorded // inferred from expression pattern // inferred from …	GO:0005634 // GO:0005634 // GO:0005667 // GO:0005667 // GO:0005634 // GO:0005634 // GO:0005667 // GO:0005667 // GO:0005634 // GO:0005634 // GO:0005667 // GO:0005667 // GO:0005634 // GO:0005634 // GO:0005667 // GO:0005667 // GO:0005634 // GO:0005634 // GO:0005667 // GO:0005667 // GO:0005634 // GO:0005634 // GO:0005667 // GO:0005667 // GO:0005634 // GO:0005634 // GO:0005667 // GO:0005667 // GO:0005…	nucleus // nucleus // transcription factor complex // transcription factor complex // nucleus // nucleus // transcription factor complex // transcription factor complex // nucleus // nucleus // transcription factor complex // transcription factor complex // nucleus // nucleus // transcription factor complex // transcription factor complex // nucleus // nucleus // transcription factor complex // t…	inferred from electronic annotation // not recorded // inferred from electronic annotation // not recorded // inferred from electronic annotation // not recorded // inferred from electronic annotation // not recorded // inferred from electronic annotation // not recorded // inferred from electronic annotation // not recorded // inferred from electronic annotation // not recorded // inferred from …	GO:0003677 // GO:0003700 // GO:0043565 // GO:0003677 // GO:0003677 // GO:0003700 // GO:0043565 // GO:0005515 // GO:0003677 // GO:0046983 // GO:0003677 // GO:0003700 // GO:0043565 // GO:0003677 // GO:0003677 // GO:0003700 // GO:0043565 // GO:0003677 // GO:0003677 // GO:0003700 // GO:0043565 // GO:0003677 // GO:0003677 // GO:0003700 // GO:0043565 // GO:0003677 // GO:0003677 // GO:0003700 // GO:0043…	DNA binding // sequence-specific DNA binding transcription factor activity // sequence-specific DNA binding // DNA binding // DNA binding // sequence-specific DNA binding transcription factor activity // sequence-specific DNA binding // protein binding // DNA binding // protein dimerization activity // DNA binding // sequence-specific DNA binding transcription factor activity // sequence-specific…	not recorded // inferred from electronic annotation // inferred from electronic annotation // inferred from electronic annotation // not recorded // inferred from electronic annotation // inferred from electronic annotation // inferred from electronic annotation // inferred from electronic annotation // inferred from electronic annotation // not recorded // inferred from electronic annotation // …	---	---	Pfam // Pfam // Pfam // Pfam // Pfam // Pfam // Pfam // Pfam	IPR003102 // IPR004827 // IPR003102 // IPR004827 // IPR003102 // IPR004827 // IPR004827 // IPR004827	Coactivator CBP, pKID // Basic-leucine zipper domain // Coactivator CBP, pKID // Basic-leucine zipper domain // Coactivator CBP, pKID // Basic-leucine zipper domain // Basic-leucine zipper domain // Basic-leucine zipper domain	main	6.32598	6.87357	6.03963	7.85014	7.48419	8.15554
10806946	Hhip	Hedgehog-interacting protein	0.0180101	0.393	28.64	76.08	2.63158	up	NM_001191817 // ENSRNOT00000024616	RefSeq // ENSEMBL	Rattus norvegicus Hedgehog-interacting protein (Hhip), mRNA. // cdna:known chromosome:Rnor_5.0:19:42430120:42518700:1 gene:ENSRNOG00000018268 gene_biotype:protein_coding transcript_biotype:protein_coding	chr19	+	29752100	29841962	GO:0005975 // GO:0007165 // GO:0007224 // GO:0007224 // GO:0007405 // GO:0007405 // GO:0009887 // GO:0009953 // GO:0009953 // GO:0009968 // GO:0040036 // GO:0040036 // GO:0045879 // GO:0045879 // GO:0048705 // GO:0048705 // GO:0060441 // GO:0060441 // GO:0007165 // GO:0009887 // GO:0009968 // GO:0005975 // GO:0007165 // GO:0007224 // GO:0007224 // GO:0007405 // GO:0007405 // GO:0009887 // GO:0009…	carbohydrate metabolic process // signal transduction // smoothened signaling pathway // smoothened signaling pathway // neuroblast proliferation // neuroblast proliferation // organ morphogenesis // dorsal/ventral pattern formation // dorsal/ventral pattern formation // negative regulation of signal transduction // regulation of fibroblast growth factor receptor signaling pathway // regulation o…	inferred from electronic annotation // not recorded // inferred from electronic annotation // not recorded // inferred from electronic annotation // not recorded // not recorded // inferred from electronic annotation // not recorded // not recorded // inferred from electronic annotation // not recorded // inferred from electronic annotation // not recorded // inferred from electronic annotation /…	GO:0005887 // GO:0005887 // GO:0009986 // GO:0009986 // GO:0005887 // GO:0005887 // GO:0009986 // GO:0009986	integral to plasma membrane // integral to plasma membrane // cell surface // cell surface // integral to plasma membrane // integral to plasma membrane // cell surface // cell surface	inferred from electronic annotation // not recorded // inferred from electronic annotation // not recorded // inferred from electronic annotation // not recorded // inferred from electronic annotation // not recorded	GO:0008270 // GO:0008270 // GO:0016901 // GO:0048038 // GO:0097108 // GO:0097108 // GO:0003824 // GO:0008270 // GO:0008270 // GO:0016901 // GO:0048038 // GO:0097108 // GO:0097108 // GO:0005515 // GO:0003824	zinc ion binding // zinc ion binding // oxidoreductase activity, acting on the CH-OH group of donors, quinone or similar compound as acceptor // quinone binding // hedgehog family protein binding // hedgehog family protein binding // catalytic activity // zinc ion binding // zinc ion binding // oxidoreductase activity, acting on the CH-OH group of donors, quinone or similar compound as acceptor /…	inferred from electronic annotation // not recorded // inferred from electronic annotation // inferred from electronic annotation // inferred from electronic annotation // not recorded // inferred from electronic annotation // inferred from electronic annotation // not recorded // inferred from electronic annotation // inferred from electronic annotation // inferred from electronic annotation // …	---	---	Pfam	IPR018143	Folate receptor-like	main	4.7058	4.96356	4.87875	5.36883	6.01768	7.41444
10826846	Sgms2	sphingomyelin synthase 2	7.2e-06	0.0246	279.98	738.8	2.63158	up	NM_001014043 // ENSRNOT00000015020 // BC085803	RefSeq // ENSEMBL // GenBank	Rattus norvegicus sphingomyelin synthase 2 (Sgms2), mRNA. // cdna:known chromosome:Rnor_5.0:2:255006746:255028969:-1 gene:ENSRNOG00000011284 gene_biotype:protein_coding transcript_biotype:protein_coding // Rattus norvegicus sphingomyelin synthase 2, mRNA (cDNA clone MGC:93838 IMAGE:7111151), complete cds.	chr2	-	228815312	228838295	GO:0006686 // GO:0006686 // GO:0006629 // GO:0006665 // GO:0016310 // GO:0006686 // GO:0006686 // GO:0006629 // GO:0006665 // GO:0016310 // GO:0006686 // GO:0006686 // GO:0006629 // GO:0006665 // GO:0016310	sphingomyelin biosynthetic process // sphingomyelin biosynthetic process // lipid metabolic process // sphingolipid metabolic process // phosphorylation // sphingomyelin biosynthetic process // sphingomyelin biosynthetic process // lipid metabolic process // sphingolipid metabolic process // phosphorylation // sphingomyelin biosynthetic process // sphingomyelin biosynthetic process // lipid metab…	inferred from electronic annotation // not recorded // inferred from electronic annotation // inferred from electronic annotation // inferred from electronic annotation // inferred from electronic annotation // not recorded // inferred from electronic annotation // inferred from electronic annotation // inferred from electronic annotation // inferred from electronic annotation // not recorded // …	GO:0005794 // GO:0005887 // GO:0005887 // GO:0030173 // GO:0030173 // GO:0045203 // GO:0000139 // GO:0005794 // GO:0005886 // GO:0016020 // GO:0016021 // GO:0005794 // GO:0005887 // GO:0005887 // GO:0030173 // GO:0030173 // GO:0045203 // GO:0016020 // GO:0005794 // GO:0000139 // GO:0005886 // GO:0016021 // GO:0005794 // GO:0005887 // GO:0005887 // GO:0030173 // GO:0030173 // GO:0045203 // GO:0000…	Golgi apparatus // integral to plasma membrane // integral to plasma membrane // integral to Golgi membrane // integral to Golgi membrane // integral to cell outer membrane // Golgi membrane // Golgi apparatus // plasma membrane // membrane // integral to membrane // Golgi apparatus // integral to plasma membrane // integral to plasma membrane // integral to Golgi membrane // integral to Golgi me…	not recorded // inferred from electronic annotation // not recorded // inferred from electronic annotation // not recorded // inferred from direct assay // inferred from electronic annotation // inferred from electronic annotation // inferred from electronic annotation // inferred from electronic annotation // inferred from electronic annotation // not recorded // inferred from electronic annotat…	GO:0016301 // GO:0033188 // GO:0047493 // GO:0047493 // GO:0016740 // GO:0016301 // GO:0033188 // GO:0047493 // GO:0047493 // GO:0003824 // GO:0016740 // GO:0016301 // GO:0033188 // GO:0047493 // GO:0047493 // GO:0016740	kinase activity // sphingomyelin synthase activity // ceramide cholinephosphotransferase activity // ceramide cholinephosphotransferase activity // transferase activity // kinase activity // sphingomyelin synthase activity // ceramide cholinephosphotransferase activity // ceramide cholinephosphotransferase activity // catalytic activity // transferase activity // kinase activity // sphingomyelin …	inferred from electronic annotation // inferred from electronic annotation // inferred from electronic annotation // not recorded // inferred from electronic annotation // inferred from electronic annotation // inferred from electronic annotation // inferred from electronic annotation // not recorded // inferred from electronic annotation // inferred from electronic annotation // inferred from el…	---	---	---	---	---	main	8.26801	8.21528	7.93186	9.52334	9.59548	9.52118
10856424	Retsat	retinol saturase (all trans retinol 13,14 reductase)	2.58e-05	0.0504	467.14	1242.97	2.63158	up	ENSRNOT00000019571 // NM_145084	ENSEMBL // RefSeq	cdna:known chromosome:Rnor_5.0:4:165235748:165244511:1 gene:ENSRNOG00000014090 gene_biotype:protein_coding transcript_biotype:protein_coding // Rattus norvegicus retinol saturase (all trans retinol 13,14 reductase) (Retsat), mRNA.	chr4	+	106100103	106108866	GO:0042572 // GO:0042572 // GO:0042572 // GO:0055114 // GO:0055114 // GO:0055114 // GO:0042572 // GO:0042572 // GO:0042572 // GO:0042572 // GO:0055114 // GO:0055114 // GO:0042572 // GO:0055114	retinol metabolic process // retinol metabolic process // retinol metabolic process // oxidation-reduction process // oxidation-reduction process // oxidation-reduction process // retinol metabolic process // retinol metabolic process // retinol metabolic process // retinol metabolic process // oxidation-reduction process // oxidation-reduction process // retinol metabolic process // oxidation-re…	not recorded // inferred from electronic annotation // inferred from sequence or structural similarity // not recorded // inferred from sequence or structural similarity // inferred from electronic annotation // --- // not recorded // inferred from electronic annotation // inferred from sequence or structural similarity // not recorded // inferred from sequence or structural similarity // --- // …	GO:0005640 // GO:0005640 // GO:0005640 // GO:0005789 // GO:0005789 // GO:0005789 // GO:0031965 // GO:0031965 // GO:0031965 // GO:0005783 // GO:0005789 // GO:0016020 // GO:0005640 // GO:0005640 // GO:0005640 // GO:0005789 // GO:0005789 // GO:0005789 // GO:0031965 // GO:0031965 // GO:0005783 // GO:0005789 // GO:0016020	nuclear outer membrane // nuclear outer membrane // nuclear outer membrane // endoplasmic reticulum membrane // endoplasmic reticulum membrane // endoplasmic reticulum membrane // nuclear membrane // nuclear membrane // nuclear membrane // endoplasmic reticulum // endoplasmic reticulum membrane // membrane // nuclear outer membrane // nuclear outer membrane // nuclear outer membrane // endoplasmi…	inferred from electronic annotation // not recorded // inferred from sequence or structural similarity // not recorded // inferred from electronic annotation // inferred from sequence or structural similarity // not recorded // inferred from sequence or structural similarity // inferred from electronic annotation // inferred from electronic annotation // --- // inferred from electronic annotation…	GO:0016491 // GO:0016491 // GO:0051786 // GO:0051786 // GO:0051786 // GO:0016491 // GO:0051786 // GO:0016491 // GO:0016491 // GO:0051786 // GO:0051786 // GO:0051786 // GO:0016491 // GO:0051786	oxidoreductase activity // oxidoreductase activity // all-trans-retinol 13,14-reductase activity // all-trans-retinol 13,14-reductase activity // all-trans-retinol 13,14-reductase activity // oxidoreductase activity // all-trans-retinol 13,14-reductase activity // oxidoreductase activity // oxidoreductase activity // all-trans-retinol 13,14-reductase activity // all-trans-retinol 13,14-reductase …	not recorded // inferred from sequence or structural similarity // not recorded // inferred from electronic annotation // inferred from sequence or structural similarity // inferred from electronic annotation // --- // not recorded // inferred from sequence or structural similarity // not recorded // inferred from electronic annotation // inferred from sequence or structural similarity // inferre…	---	---	Pfam // Pfam // Pfam	IPR002937 // IPR003953 // IPR006076	Amine oxidase // FAD binding domain // FAD dependent oxidoreductase	main	8.91771	8.80465	8.90833	10.0247	10.2763	10.5907
10868940	Nr4a3	nuclear receptor subfamily 4, group A, member 3	0.0003797	0.141	39.85	103.84	2.63158	up	ENSRNOT00000008302 // NM_031628 // DQ268830	ENSEMBL // RefSeq // GenBank	cdna:known chromosome:Rnor_5.0:5:68298772:68339859:1 gene:ENSRNOG00000005964 gene_biotype:protein_coding transcript_biotype:protein_coding // Rattus norvegicus nuclear receptor subfamily 4, group A, member 3 (Nr4a3), mRNA. // Rattus norvegicus neuron-derived orphan receptor 1 mRNA, complete cds.	chr5	+	64713468	64754555	GO:0001707 // GO:0001707 // GO:0007411 // GO:0007411 // GO:0021766 // GO:0021766 // GO:0030534 // GO:0030534 // GO:0031100 // GO:0033554 // GO:0042472 // GO:0042542 // GO:0043066 // GO:0043434 // GO:0043524 // GO:0043524 // GO:0045787 // GO:0045787 // GO:0045944 // GO:0048752 // GO:0048752 // GO:0050885 // GO:0050885 // GO:0060005 // GO:0060005 // GO:2000108 // GO:2000108 // GO:0006355 // GO:0043…	mesoderm formation // mesoderm formation // axon guidance // axon guidance // hippocampus development // hippocampus development // adult behavior // adult behavior // organ regeneration // cellular response to stress // inner ear morphogenesis // response to hydrogen peroxide // negative regulation of apoptotic process // response to peptide hormone stimulus // negative regulation of neuron apop…	inferred from electronic annotation // not recorded // inferred from electronic annotation // not recorded // inferred from electronic annotation // not recorded // inferred from electronic annotation // not recorded // inferred from expression pattern // inferred from electronic annotation // not recorded // not recorded // not recorded // inferred from expression pattern // inferred from electr…	GO:0005667 // GO:0005667 // GO:0005575 // GO:0005634 // GO:0005667 // GO:0005667 // GO:0005575 // GO:0005634 // GO:0005667 // GO:0005667 // GO:0005575 // GO:0005634	transcription factor complex // transcription factor complex // cellular_component // nucleus // transcription factor complex // transcription factor complex // cellular_component // nucleus // transcription factor complex // transcription factor complex // cellular_component // nucleus	inferred from electronic annotation // not recorded // no biological data available // inferred from electronic annotation // inferred from electronic annotation // not recorded // no biological data available // inferred from electronic annotation // inferred from electronic annotation // not recorded // no biological data available // inferred from electronic annotation	GO:0001077 // GO:0001077 // GO:0003677 // GO:0003707 // GO:0004879 // GO:0008270 // GO:0043565 // GO:0043565 // GO:0003700 // GO:0003677 // GO:0046872 // GO:0001077 // GO:0001077 // GO:0003677 // GO:0003707 // GO:0004879 // GO:0008270 // GO:0043565 // GO:0043565 // GO:0003677 // GO:0003700 // GO:0046872 // GO:0001077 // GO:0001077 // GO:0003677 // GO:0003707 // GO:0004879 // GO:0008270 // GO:0043…	RNA polymerase II core promoter proximal region sequence-specific DNA binding transcription factor activity involved in positive regulation of transcription // RNA polymerase II core promoter proximal region sequence-specific DNA binding transcription factor activity involved in positive regulation of transcription // DNA binding // steroid hormone receptor activity // ligand-activated sequence-s…	inferred from electronic annotation // not recorded // inferred from direct assay // inferred from electronic annotation // inferred from electronic annotation // inferred from electronic annotation // inferred from electronic annotation // not recorded // inferred from electronic annotation // inferred from electronic annotation // inferred from electronic annotation // inferred from electronic …	---	---	Pfam // Pfam	IPR000536 // IPR001628	Nuclear hormone receptor, ligand-binding, core // Zinc finger, nuclear hormone receptor-type	main	5.05714	5.8284	5.09117	6.87771	6.53198	6.73794
10702660	Akap12	A kinase (PRKA) anchor protein 12	0.0083606	0.313	76.35	197.76	2.5641	up	NM_057103 // ENSRNOT00000060767 // NM_001033653 // AY695056 // ENSRNOT00000026482	RefSeq // ENSEMBL // RefSeq // GenBank // ENSEMBL	Rattus norvegicus A kinase (PRKA) anchor protein 12 (Akap12), transcript variant 1, mRNA. // cdna:known chromosome:Rnor_5.0:1:42162163:42252614:1 gene:ENSRNOG00000019549 gene_biotype:protein_coding transcript_biotype:protein_coding // Rattus norvegicus A kinase (PRKA) anchor protein 12 (Akap12), transcript variant 2, mRNA. // Rattus norvegicus A kinase anchoring protein 12 alpha (Akap12) mRNA, co…	chr1	+	34979039	35068765	GO:0006605 // GO:0007165 // GO:0007165 // GO:0010739 // GO:0010739 // GO:0030819 // GO:0030819 // GO:0006605 // GO:0007165 // GO:0007165 // GO:0010739 // GO:0010739 // GO:0030819 // GO:0030819 // GO:0006605 // GO:0007165 // GO:0007165 // GO:0010739 // GO:0010739 // GO:0030819 // GO:0030819 // GO:0006605 // GO:0007165 // GO:0007165 // GO:0010739 // GO:0010739 // GO:0030819 // GO:0030819 // GO:0006…	protein targeting // signal transduction // signal transduction // positive regulation of protein kinase A signaling cascade // positive regulation of protein kinase A signaling cascade // positive regulation of cAMP biosynthetic process // positive regulation of cAMP biosynthetic process // protein targeting // signal transduction // signal transduction // positive regulation of protein kinase A…	inferred from electronic annotation // inferred from direct assay // inferred from electronic annotation // inferred from electronic annotation // not recorded // inferred from electronic annotation // not recorded // inferred from electronic annotation // inferred from direct assay // inferred from electronic annotation // inferred from electronic annotation // not recorded // inferred from elec…	GO:0005737 // GO:0005737 // GO:0005856 // GO:0005886 // GO:0005886 // GO:0005737 // GO:0005737 // GO:0005856 // GO:0005886 // GO:0005886 // GO:0005737 // GO:0005737 // GO:0005856 // GO:0005886 // GO:0005886 // GO:0005737 // GO:0005737 // GO:0005856 // GO:0005886 // GO:0005886 // GO:0005737 // GO:0005737 // GO:0005856 // GO:0005886 // GO:0005886	cytoplasm // cytoplasm // cytoskeleton // plasma membrane // plasma membrane // cytoplasm // cytoplasm // cytoskeleton // plasma membrane // plasma membrane // cytoplasm // cytoplasm // cytoskeleton // plasma membrane // plasma membrane // cytoplasm // cytoplasm // cytoskeleton // plasma membrane // plasma membrane // cytoplasm // cytoplasm // cytoskeleton // plasma membrane // plasma membrane	inferred from electronic annotation // not recorded // inferred from electronic annotation // inferred from electronic annotation // not recorded // inferred from electronic annotation // not recorded // inferred from electronic annotation // inferred from electronic annotation // not recorded // inferred from electronic annotation // not recorded // inferred from electronic annotation // inferre…	GO:0008179 // GO:0008179 // GO:0008179 // GO:0008179 // GO:0005515 // GO:0008179 // GO:0008179 // GO:0008179 // GO:0008179 // GO:0008179 // GO:0008179	adenylate cyclase binding // adenylate cyclase binding // adenylate cyclase binding // adenylate cyclase binding // protein binding // adenylate cyclase binding // adenylate cyclase binding // adenylate cyclase binding // adenylate cyclase binding // adenylate cyclase binding // adenylate cyclase binding	inferred from electronic annotation // not recorded // inferred from electronic annotation // not recorded // inferred from electronic annotation // inferred from electronic annotation // not recorded // inferred from electronic annotation // not recorded // inferred from electronic annotation // not recorded	---	---	Pfam // Pfam // Pfam // Pfam	IPR001573 // IPR018459 // IPR001573 // IPR018459	Protein kinase A anchoring, WSK motif // RII binding domain // Protein kinase A anchoring, WSK motif // RII binding domain	main	5.98517	6.84059	5.96542	7.28661	8.42282	7.22619
10732657	RGD1309926	similar to RIKEN cDNA G431001E03 gene	0.0010871	0.175	97.15	250.53	2.5641	up	ENSRNOT00000073675	ENSEMBL	cdna:known chromosome:Rnor_5.0:10:17104828:17168228:1 gene:ENSRNOG00000004063 gene_biotype:protein_coding transcript_biotype:protein_coding	chr10	+	17184302	17265186	GO:0007154	cell communication	inferred from electronic annotation	---	---	---	GO:0035091 // GO:0005515	phosphatidylinositol binding // protein binding	inferred from electronic annotation // inferred from electronic annotation	---	---	Pfam // Pfam // Pfam	IPR001452 // IPR001683 // IPR011511	Src homology-3 domain // Phox homologous domain // Variant SH3	main	6.58285	6.35717	6.89414	7.95812	8.49295	7.50835
10765850	Spta1	spectrin, alpha, erythrocytic 1 (elliptocytosis 2)	0.0001427	0.105	21.56	54.67	2.5641	up	NM_001011908 // ENSRNOT00000066509 // AY238342 // ENSRNOT00000004716	RefSeq // ENSEMBL // GenBank // ENSEMBL	Rattus norvegicus spectrin, alpha, erythrocytic 1 (elliptocytosis 2) (Spta1), mRNA. // cdna:known chromosome:Rnor_5.0:13:96764163:96859811:1 gene:ENSRNOG00000003537 gene_biotype:protein_coding transcript_biotype:protein_coding // Rattus norvegicus erythroid spectrin alpha mRNA, complete cds. // cdna:known chromosome:Rnor_5.0:13:96764163:96859811:1 gene:ENSRNOG00000003537 gene_biotype:protein_codi…	chr13	+	89951924	90028592	GO:0002260 // GO:0006779 // GO:0007009 // GO:0008360 // GO:0030036 // GO:0030097 // GO:0032092 // GO:0042102 // GO:0008150 // GO:0002260 // GO:0006779 // GO:0007009 // GO:0008360 // GO:0030036 // GO:0030097 // GO:0032092 // GO:0042102 // GO:0002260 // GO:0030036 // GO:0006779 // GO:0007009 // GO:0008360 // GO:0030097 // GO:0032092 // GO:0042102 // GO:0008150 // GO:0002260 // GO:0006779 // GO:0007…	lymphocyte homeostasis // porphyrin-containing compound biosynthetic process // plasma membrane organization // regulation of cell shape // actin cytoskeleton organization // hemopoiesis // positive regulation of protein binding // positive regulation of T cell proliferation // biological_process // lymphocyte homeostasis // porphyrin-containing compound biosynthetic process // plasma membrane or…	not recorded // not recorded // not recorded // not recorded // not recorded // not recorded // not recorded // not recorded // no biological data available // not recorded // not recorded // not recorded // not recorded // not recorded // not recorded // not recorded // not recorded // inferred from electronic annotation // inferred from electronic annotation // inferred from electronic annotati…	GO:0008091 // GO:0014731 // GO:0016020 // GO:0030863 // GO:0032437 // GO:0005575 // GO:0008091 // GO:0014731 // GO:0016020 // GO:0030863 // GO:0032437 // GO:0016020 // GO:0014731 // GO:0030863 // GO:0032437 // GO:0005575 // GO:0008091 // GO:0014731 // GO:0016020 // GO:0030863 // GO:0032437 // GO:0005575 // GO:0008091 // GO:0014731 // GO:0016020 // GO:0030863 // GO:0032437 // GO:0005575	spectrin // spectrin-associated cytoskeleton // membrane // cortical cytoskeleton // cuticular plate // cellular_component // spectrin // spectrin-associated cytoskeleton // membrane // cortical cytoskeleton // cuticular plate // membrane // spectrin-associated cytoskeleton // cortical cytoskeleton // cuticular plate // cellular_component // spectrin // spectrin-associated cytoskeleton // membran…	not recorded // not recorded // not recorded // not recorded // not recorded // no biological data available // not recorded // not recorded // not recorded // not recorded // not recorded // inferred from electronic annotation // inferred from electronic annotation // inferred from electronic annotation // inferred from electronic annotation // no biological data available // not recorded // not…	GO:0005509 // GO:0046982 // GO:0003674 // GO:0005509 // GO:0046982 // GO:0005515 // GO:0046982 // GO:0003674 // GO:0005509 // GO:0046982 // GO:0003674 // GO:0005509 // GO:0046982 // GO:0005515 // GO:0003674	calcium ion binding // protein heterodimerization activity // molecular_function // calcium ion binding // protein heterodimerization activity // protein binding // protein heterodimerization activity // molecular_function // calcium ion binding // protein heterodimerization activity // molecular_function // calcium ion binding // protein heterodimerization activity // protein binding // molecula…	inferred from electronic annotation // not recorded // no biological data available // inferred from electronic annotation // not recorded // inferred from electronic annotation // inferred from electronic annotation // no biological data available // inferred from electronic annotation // not recorded // no biological data available // inferred from electronic annotation // not recorded // infer…	---	---	Pfam // Pfam // Pfam // Pfam // Pfam // Pfam // Pfam // Pfam	IPR001452 // IPR002017 // IPR011511 // IPR014837 // IPR001452 // IPR002017 // IPR011511 // IPR014837	Src homology-3 domain // Spectrin repeat // Variant SH3 // EF-hand, Ca insensitive // Src homology-3 domain // Spectrin repeat // Variant SH3 // EF-hand, Ca insensitive	main	4.56806	4.40031	4.35076	5.43779	5.77991	6.15318
10858160	LOC500300	similar to hypothetical protein MGC6835	0.0143598	0.367	114.48	293.08	2.5641	up	NM_001024334 // ENSRNOT00000018133 // AY931022	RefSeq // ENSEMBL // GenBank	Rattus norvegicus similar to hypothetical protein MGC6835 (LOC500300), mRNA. // cdna:known chromosome:Rnor_5.0:4:214721214:214723297:1 gene:ENSRNOG00000023465 gene_biotype:protein_coding transcript_biotype:protein_coding // Rattus norvegicus DEPP-like mRNA, complete cds.	chr4	+	153000782	153002562	---	---	---	GO:0005739 // GO:0005739 // GO:0005739 // GO:0005739 // GO:0005739 // GO:0005739	mitochondrion // mitochondrion // mitochondrion // mitochondrion // mitochondrion // mitochondrion	inferred from electronic annotation // not recorded // inferred from electronic annotation // not recorded // inferred from electronic annotation // not recorded	---	---	---	---	---	---	---	---	main	6.5453	7.8122	6.18689	7.76428	8.34365	8.53035
10722982	Pex11a	peroxisomal biogenesis factor 11 alpha	0.0001233	0.1	181.17	449	2.5	up	NM_053487 // ENSRNOT00000020229 // AJ224120	RefSeq // ENSEMBL // GenBank	Rattus norvegicus peroxisomal biogenesis factor 11 alpha (Pex11a), mRNA. // cdna:known chromosome:Rnor_5.0:1:142435410:142442491:-1 gene:ENSRNOG00000015003 gene_biotype:protein_coding transcript_biotype:protein_coding // Rattus norvegicus peroxisomal membrane protein Pmp26p (Peroxin-11).	chr1	-	135513735	135520816	GO:0007031 // GO:0007031 // GO:0007165 // GO:0007165 // GO:0016557 // GO:0016559 // GO:0016559 // GO:0044375 // GO:0044375 // GO:0050873 // GO:0050873 // GO:0007031 // GO:0007165 // GO:0007031 // GO:0007031 // GO:0007165 // GO:0007165 // GO:0016557 // GO:0016559 // GO:0016559 // GO:0044375 // GO:0044375 // GO:0050873 // GO:0050873 // GO:0007165 // GO:0007031 // GO:0007031 // GO:0007031 // GO:0007…	peroxisome organization // peroxisome organization // signal transduction // signal transduction // peroxisome membrane biogenesis // peroxisome fission // peroxisome fission // regulation of peroxisome size // regulation of peroxisome size // brown fat cell differentiation // brown fat cell differentiation // peroxisome organization // signal transduction // peroxisome organization // peroxisome…	not recorded // inferred from sequence or structural similarity // not recorded // inferred from sequence or structural similarity // inferred from direct assay // inferred from electronic annotation // not recorded // inferred from electronic annotation // not recorded // inferred from electronic annotation // not recorded // inferred from electronic annotation // inferred from electronic annota…	GO:0005777 // GO:0005778 // GO:0005779 // GO:0005779 // GO:0043234 // GO:0043234 // GO:0005777 // GO:0005778 // GO:0005779 // GO:0016020 // GO:0016021 // GO:0005777 // GO:0005778 // GO:0005779 // GO:0005779 // GO:0043234 // GO:0043234 // GO:0005777 // GO:0005779 // GO:0005778 // GO:0016020 // GO:0016021 // GO:0005777 // GO:0005778 // GO:0005779 // GO:0005779 // GO:0043234 // GO:0043234 // GO:0005…	peroxisome // peroxisomal membrane // integral to peroxisomal membrane // integral to peroxisomal membrane // protein complex // protein complex // peroxisome // peroxisomal membrane // integral to peroxisomal membrane // membrane // integral to membrane // peroxisome // peroxisomal membrane // integral to peroxisomal membrane // integral to peroxisomal membrane // protein complex // protein comp…	not recorded // inferred from direct assay // not recorded // inferred from sequence or structural similarity // inferred from electronic annotation // not recorded // inferred from electronic annotation // inferred from electronic annotation // inferred from electronic annotation // inferred from electronic annotation // inferred from electronic annotation // not recorded // inferred from direct…	GO:0042803 // GO:0042803 // GO:0042803 // GO:0042803 // GO:0005515 // GO:0042803 // GO:0042803	protein homodimerization activity // protein homodimerization activity // protein homodimerization activity // protein homodimerization activity // protein binding // protein homodimerization activity // protein homodimerization activity	inferred from electronic annotation // not recorded // inferred from electronic annotation // not recorded // inferred from electronic annotation // inferred from electronic annotation // not recorded	---	---	Pfam	IPR008733	Peroxisomal biogenesis factor 11	main	7.63015	7.49672	7.40431	9.07279	8.9495	8.46232
10729777	Ch25h	cholesterol 25-hydroxylase	0.0022463	0.199	87.58	220.64	2.5	up	NM_001025415 // ENSRNOT00000025856 // BC097964	RefSeq // ENSEMBL // GenBank	Rattus norvegicus cholesterol 25-hydroxylase (Ch25h), mRNA. // cdna:known chromosome:Rnor_5.0:1:260029123:260030019:-1 gene:ENSRNOG00000019141 gene_biotype:protein_coding transcript_biotype:protein_coding // Rattus norvegicus cholesterol 25-hydroxylase, mRNA (cDNA clone MGC:116092 IMAGE:7387594), complete cds.	chr1	-	238457017	238458335	GO:0006633 // GO:0008203 // GO:0008203 // GO:0016126 // GO:0055114 // GO:0006629 // GO:0006694 // GO:0008202 // GO:0055114 // GO:0006633 // GO:0008203 // GO:0008203 // GO:0016126 // GO:0055114 // GO:0055114 // GO:0006629 // GO:0006694 // GO:0008202 // GO:0006633 // GO:0008203 // GO:0008203 // GO:0016126 // GO:0055114 // GO:0006629 // GO:0006694 // GO:0008202 // GO:0055114	fatty acid biosynthetic process // cholesterol metabolic process // cholesterol metabolic process // sterol biosynthetic process // oxidation-reduction process // lipid metabolic process // steroid biosynthetic process // steroid metabolic process // oxidation-reduction process // fatty acid biosynthetic process // cholesterol metabolic process // cholesterol metabolic process // sterol biosynthe…	inferred from electronic annotation // inferred from electronic annotation // not recorded // inferred from electronic annotation // not recorded // inferred from electronic annotation // inferred from electronic annotation // inferred from electronic annotation // inferred from electronic annotation // inferred from electronic annotation // inferred from electronic annotation // not recorded // …	GO:0005789 // GO:0016021 // GO:0005783 // GO:0016020 // GO:0005789 // GO:0016021 // GO:0005783 // GO:0016020 // GO:0005789 // GO:0016021 // GO:0005783 // GO:0016020	endoplasmic reticulum membrane // integral to membrane // endoplasmic reticulum // membrane // endoplasmic reticulum membrane // integral to membrane // endoplasmic reticulum // membrane // endoplasmic reticulum membrane // integral to membrane // endoplasmic reticulum // membrane	inferred from electronic annotation // inferred from electronic annotation // inferred from electronic annotation // inferred from electronic annotation // inferred from electronic annotation // inferred from electronic annotation // inferred from electronic annotation // inferred from electronic annotation // inferred from electronic annotation // inferred from electronic annotation // inferred …	GO:0001567 // GO:0005506 // GO:0008395 // GO:0004497 // GO:0008395 // GO:0016491 // GO:0046872 // GO:0001567 // GO:0005506 // GO:0008395 // GO:0016491 // GO:0008395 // GO:0004497 // GO:0046872 // GO:0001567 // GO:0005506 // GO:0008395 // GO:0004497 // GO:0008395 // GO:0016491 // GO:0046872	cholesterol 25-hydroxylase activity // iron ion binding // steroid hydroxylase activity // monooxygenase activity // steroid hydroxylase activity // oxidoreductase activity // metal ion binding // cholesterol 25-hydroxylase activity // iron ion binding // steroid hydroxylase activity // oxidoreductase activity // steroid hydroxylase activity // monooxygenase activity // metal ion binding // chole…	inferred from electronic annotation // inferred from electronic annotation // not recorded // inferred from electronic annotation // inferred from electronic annotation // inferred from electronic annotation // inferred from electronic annotation // inferred from electronic annotation // inferred from electronic annotation // not recorded // inferred from electronic annotation // inferred from el…	---	---	Pfam	IPR006694	Fatty acid hydroxylase	main	6.02257	7.07631	6.28618	7.52177	8.1207	7.76709
10750848	Nfkbiz	nuclear factor of kappa light polypeptide gene enhancer in B-cells inhibitor, zeta	0.000734	0.161	90.96	227.45	2.5	up	NM_001107095 // ENSRNOT00000041116	RefSeq // ENSEMBL	Rattus norvegicus nuclear factor of kappa light polypeptide gene enhancer in B-cells inhibitor, zeta (Nfkbiz), mRNA. // cdna:known chromosome:Rnor_5.0:11:50420563:50447282:1 gene:ENSRNOG00000031163 gene_biotype:protein_coding transcript_biotype:protein_coding	chr11	+	45794229	45810194	GO:0006954 // GO:0006954 // GO:0006954 // GO:0006954	inflammatory response // inflammatory response // inflammatory response // inflammatory response	inferred from electronic annotation // not recorded // inferred from electronic annotation // not recorded	GO:0005634 // GO:0005634 // GO:0005634 // GO:0005634	nucleus // nucleus // nucleus // nucleus	inferred from electronic annotation // not recorded // inferred from electronic annotation // not recorded	GO:0005515	protein binding	inferred from electronic annotation	---	---	Pfam	IPR002110	Ankyrin repeat	main	6.25038	6.68484	6.61396	7.33952	8.18325	8.01839
10764773	Rgs16	regulator of G-protein signaling 16	0.0003354	0.135	65.37	164.69	2.5	up	ENSRNOT00000032236 // NM_001077589 // AY651775	ENSEMBL // RefSeq // GenBank	cdna:known chromosome:Rnor_5.0:13:76145330:76148774:1 gene:ENSRNOG00000027024 gene_biotype:protein_coding transcript_biotype:protein_coding // Rattus norvegicus regulator of G-protein signaling 16 (Rgs16), mRNA. // Rattus norvegicus regulator of G-protein signaling 16 (Rgs16) mRNA, complete cds.	chr13	+	68793976	68811307	GO:0038032 // GO:0043547 // GO:0038032 // GO:0043547 // GO:0038032 // GO:0043547	termination of G-protein coupled receptor signaling pathway // positive regulation of GTPase activity // termination of G-protein coupled receptor signaling pathway // positive regulation of GTPase activity // termination of G-protein coupled receptor signaling pathway // positive regulation of GTPase activity	inferred from electronic annotation // not recorded // inferred from electronic annotation // not recorded // inferred from electronic annotation // not recorded	GO:0005737 // GO:0005886 // GO:0045121 // GO:0005737 // GO:0005886 // GO:0045121 // GO:0005737 // GO:0005886 // GO:0045121	cytoplasm // plasma membrane // membrane raft // cytoplasm // plasma membrane // membrane raft // cytoplasm // plasma membrane // membrane raft	not recorded // not recorded // inferred from direct assay // not recorded // not recorded // inferred from direct assay // not recorded // not recorded // inferred from direct assay	GO:0005096 // GO:0005515 // GO:0005096 // GO:0005096	GTPase activator activity // protein binding // GTPase activator activity // GTPase activator activity	not recorded // inferred from electronic annotation // not recorded // not recorded	---	---	Pfam	IPR000342	Regulator of G protein signalling	main	6.10808	5.92401	6.08689	7.3495	7.81165	6.98259
10842596	Pck1	phosphoenolpyruvate carboxykinase 1 (soluble)	3.12e-05	0.0533	2025.02	5114.48	2.5	up	NM_198780 // ENSRNOT00000031586 // BC081900	RefSeq // ENSEMBL // GenBank	Rattus norvegicus phosphoenolpyruvate carboxykinase 1 (soluble) (Pck1), mRNA. // cdna:known chromosome:Rnor_5.0:3:177278783:177284731:1 gene:ENSRNOG00000028616 gene_biotype:protein_coding transcript_biotype:protein_coding // Rattus norvegicus phosphoenolpyruvate carboxykinase 1 (soluble), mRNA (cDNA clone MGC:93820 IMAGE:7110760), complete cds.	chr3	+	164012410	164018359	GO:0006006 // GO:0006006 // GO:0006094 // GO:0006094 // GO:0006094 // GO:0006094 // GO:0006107 // GO:0006475 // GO:0006475 // GO:0006629 // GO:0014823 // GO:0032868 // GO:0032868 // GO:0042593 // GO:0046327 // GO:0046327 // GO:0006006 // GO:0006475 // GO:0006629 // GO:0032868 // GO:0046327 // GO:0006006 // GO:0006006 // GO:0006094 // GO:0006094 // GO:0006094 // GO:0006094 // GO:0006107 // GO:0006…	glucose metabolic process // glucose metabolic process // gluconeogenesis // gluconeogenesis // gluconeogenesis // gluconeogenesis // oxaloacetate metabolic process // internal protein amino acid acetylation // internal protein amino acid acetylation // lipid metabolic process // response to activity // response to insulin stimulus // response to insulin stimulus // glucose homeostasis // glycero…	inferred from mutant phenotype // not recorded // inferred from direct assay // inferred from electronic annotation // not recorded // traceable author statement // inferred from direct assay // not recorded // inferred from sequence or structural similarity // not recorded // inferred from expression pattern // not recorded // inferred from sequence or structural similarity // inferred from dire…	GO:0005737 // GO:0005829 // GO:0005737 // GO:0005737 // GO:0005829 // GO:0005634 // GO:0005737 // GO:0005737 // GO:0005829 // GO:0005737	cytoplasm // cytosol // cytoplasm // cytoplasm // cytosol // nucleus // cytoplasm // cytoplasm // cytosol // cytoplasm	inferred from direct assay // traceable author statement // inferred from electronic annotation // inferred from direct assay // traceable author statement // inferred from electronic annotation // inferred from electronic annotation // inferred from direct assay // traceable author statement // inferred from electronic annotation	GO:0000287 // GO:0000287 // GO:0004611 // GO:0004611 // GO:0004613 // GO:0005525 // GO:0005525 // GO:0019003 // GO:0030145 // GO:0030145 // GO:0031406 // GO:0031406 // GO:0000166 // GO:0000287 // GO:0004611 // GO:0004613 // GO:0005525 // GO:0016829 // GO:0016831 // GO:0017076 // GO:0030145 // GO:0031406 // GO:0046872 // GO:0000287 // GO:0000287 // GO:0004611 // GO:0004611 // GO:0004613 // GO:0005…	magnesium ion binding // magnesium ion binding // phosphoenolpyruvate carboxykinase activity // phosphoenolpyruvate carboxykinase activity // phosphoenolpyruvate carboxykinase (GTP) activity // GTP binding // GTP binding // GDP binding // manganese ion binding // manganese ion binding // carboxylic acid binding // carboxylic acid binding // nucleotide binding // magnesium ion binding // phosphoen…	not recorded // inferred from sequence or structural similarity // inferred from direct assay // not recorded // inferred from direct assay // inferred from direct assay // not recorded // inferred from direct assay // inferred from direct assay // not recorded // inferred from direct assay // not recorded // inferred from electronic annotation // inferred from electronic annotation // inferred f…	GenMAPP // GenMAPP // GenMAPP	Glycolysis_and_Gluconeogenesis // Glycolysis_and_Gluconeogenesis // Glycolysis_and_Gluconeogenesis	Pfam	IPR008209	Phosphoenolpyruvate carboxykinase, GTP-utilising	main	11.1525	10.8134	11.0128	12.5804	12.2708	12.1629
10850092	Rassf2	Ras association (RalGDS/AF-6) domain family member 2	0.0068393	0.294	139.27	347.88	2.5	up	ENSRNOT00000028883 // NM_001037096 // BC107656	ENSEMBL // RefSeq // GenBank	cdna:known chromosome:Rnor_5.0:3:131075323:131109910:-1 gene:ENSRNOG00000021261 gene_biotype:protein_coding transcript_biotype:protein_coding // Rattus norvegicus Ras association (RalGDS/AF-6) domain family member 2 (Rassf2), mRNA. // Rattus norvegicus Ras association (RalGDS/AF-6) domain family member 2, mRNA (cDNA clone MGC:124713 IMAGE:7935449), complete cds.	chr3	-	119735734	119769685	GO:0007049 // GO:0007165 // GO:0007049 // GO:0007165 // GO:0007049 // GO:0007165	cell cycle // signal transduction // cell cycle // signal transduction // cell cycle // signal transduction	inferred from electronic annotation // inferred from electronic annotation // inferred from electronic annotation // inferred from electronic annotation // inferred from electronic annotation // inferred from electronic annotation	GO:0005634 // GO:0005737 // GO:0005634 // GO:0005737 // GO:0005634 // GO:0005737	nucleus // cytoplasm // nucleus // cytoplasm // nucleus // cytoplasm	inferred from electronic annotation // inferred from electronic annotation // inferred from electronic annotation // inferred from electronic annotation // inferred from electronic annotation // inferred from electronic annotation	GO:0005515	protein binding	inferred from electronic annotation	---	---	Pfam	IPR000159	Ras-association	main	7.86264	7.00627	6.52382	8.76366	8.5602	8.05639
10853401	Steap2	STEAP family member 2, metalloreductase	0.004948	0.26	240.69	596.14	2.5	up	NM_001107846 // ENSRNOT00000007977	RefSeq // ENSEMBL	Rattus norvegicus STEAP family member 2, metalloreductase (Steap2), mRNA. // cdna:known chromosome:Rnor_5.0:4:25414631:25434255:1 gene:ENSRNOG00000006076 gene_biotype:protein_coding transcript_biotype:protein_coding	chr4	+	25043980	25060394	GO:0006893 // GO:0006893 // GO:0006897 // GO:0006897 // GO:0009725 // GO:0009725 // GO:0045055 // GO:0045055 // GO:0006893 // GO:0006893 // GO:0006897 // GO:0006897 // GO:0009725 // GO:0009725 // GO:0045055 // GO:0045055 // GO:0055114	Golgi to plasma membrane transport // Golgi to plasma membrane transport // endocytosis // endocytosis // response to hormone stimulus // response to hormone stimulus // regulated secretory pathway // regulated secretory pathway // Golgi to plasma membrane transport // Golgi to plasma membrane transport // endocytosis // endocytosis // response to hormone stimulus // response to hormone stimulus …	inferred from electronic annotation // not recorded // inferred from electronic annotation // not recorded // inferred from electronic annotation // not recorded // inferred from electronic annotation // not recorded // inferred from electronic annotation // not recorded // inferred from electronic annotation // not recorded // inferred from electronic annotation // not recorded // inferred from …	GO:0005769 // GO:0005769 // GO:0005829 // GO:0005829 // GO:0005886 // GO:0005886 // GO:0030140 // GO:0030140 // GO:0030173 // GO:0030173 // GO:0016021 // GO:0005769 // GO:0005769 // GO:0005829 // GO:0005829 // GO:0005886 // GO:0005886 // GO:0030140 // GO:0030140 // GO:0030173 // GO:0030173 // GO:0016021	early endosome // early endosome // cytosol // cytosol // plasma membrane // plasma membrane // trans-Golgi network transport vesicle // trans-Golgi network transport vesicle // integral to Golgi membrane // integral to Golgi membrane // integral to membrane // early endosome // early endosome // cytosol // cytosol // plasma membrane // plasma membrane // trans-Golgi network transport vesicle // …	inferred from electronic annotation // not recorded // inferred from electronic annotation // not recorded // inferred from electronic annotation // not recorded // inferred from electronic annotation // not recorded // inferred from electronic annotation // not recorded // inferred from electronic annotation // inferred from electronic annotation // not recorded // inferred from electronic annot…	GO:0005215 // GO:0005215 // GO:0016491 // GO:0005215 // GO:0005215 // GO:0016491 // GO:0000166	transporter activity // transporter activity // oxidoreductase activity // transporter activity // transporter activity // oxidoreductase activity // nucleotide binding	inferred from electronic annotation // not recorded // inferred from electronic annotation // inferred from electronic annotation // not recorded // inferred from electronic annotation // inferred from electronic annotation	---	---	Pfam // Pfam	IPR004455 // IPR013130	NADP oxidoreductase, coenzyme F420-dependent // Ferric reductase transmembrane component-like domain	main	8.61322	7.92898	7.21842	9.35105	9.26539	9.09497
10714353	Tmem2	transmembrane protein 2	0.0022124	0.199	67.53	166.02	2.43902	up	NM_001107596 // ENSRNOT00000067384	RefSeq // ENSEMBL	Rattus norvegicus transmembrane protein 2 (Tmem2), mRNA. // cdna:known chromosome:Rnor_5.0:1:246700907:246762954:1 gene:ENSRNOG00000012782 gene_biotype:protein_coding transcript_biotype:protein_coding	chr1	+	225036961	225096782	---	---	---	GO:0016021 // GO:0016021	integral to membrane // integral to membrane	inferred from electronic annotation // inferred from electronic annotation	---	---	---	---	---	Pfam	IPR019316	G8 domain	main	5.92959	6.32059	6.00956	6.84579	7.97345	7.35933
10719616	PVR	poliovirus receptor	0.0043674	0.254	43.61	106.28	2.43902	up	ENSRNOT00000064305 // NM_017076 // L12025 // ENSRNOT00000043096	ENSEMBL // RefSeq // GenBank // ENSEMBL	cdna:known chromosome:Rnor_5.0:1:82085299:82100950:-1 gene:ENSRNOG00000019202 gene_biotype:protein_coding transcript_biotype:protein_coding // Rattus norvegicus poliovirus receptor (PVR), mRNA. // Rattus norvegicus tumor-associated glycoprotein E4 (Tage4) mRNA, complete cds. // cdna:known chromosome:Rnor_5.0:1:82085299:82100950:-1 gene:ENSRNOG00000019202 gene_biotype:protein_coding transcript_bio…	chr1	-	79213389	79229177	GO:0002860 // GO:0009615 // GO:0016337 // GO:0016337 // GO:0016477 // GO:0016477 // GO:0042271 // GO:0045954 // GO:0060370 // GO:0002860 // GO:0009615 // GO:0016337 // GO:0016337 // GO:0016477 // GO:0016477 // GO:0042271 // GO:0045954 // GO:0060370 // GO:0002860 // GO:0009615 // GO:0016337 // GO:0016337 // GO:0016477 // GO:0016477 // GO:0042271 // GO:0045954 // GO:0060370 // GO:0002860 // GO:0009…	positive regulation of natural killer cell mediated cytotoxicity directed against tumor cell target // response to virus // cell-cell adhesion // cell-cell adhesion // cell migration // cell migration // susceptibility to natural killer cell mediated cytotoxicity // positive regulation of natural killer cell mediated cytotoxicity // susceptibility to T cell mediated cytotoxicity // positive regul…	not recorded // inferred from mutant phenotype // inferred from electronic annotation // not recorded // inferred from electronic annotation // not recorded // not recorded // not recorded // not recorded // not recorded // inferred from mutant phenotype // inferred from electronic annotation // not recorded // inferred from electronic annotation // not recorded // not recorded // not recorded //…	GO:0005634 // GO:0005730 // GO:0005886 // GO:0009986 // GO:0016021 // GO:0016021 // GO:0030054 // GO:0043231 // GO:0016020 // GO:0005634 // GO:0005730 // GO:0005886 // GO:0009986 // GO:0016021 // GO:0016021 // GO:0030054 // GO:0043231 // GO:0016020 // GO:0005634 // GO:0005730 // GO:0005886 // GO:0009986 // GO:0016021 // GO:0016021 // GO:0030054 // GO:0043231 // GO:0016020 // GO:0005634 // GO:0005…	nucleus // nucleolus // plasma membrane // cell surface // integral to membrane // integral to membrane // cell junction // intracellular membrane-bounded organelle // membrane // nucleus // nucleolus // plasma membrane // cell surface // integral to membrane // integral to membrane // cell junction // intracellular membrane-bounded organelle // membrane // nucleus // nucleolus // plasma membrane…	not recorded // not recorded // not recorded // not recorded // inferred from electronic annotation // not recorded // not recorded // not recorded // inferred from electronic annotation // not recorded // not recorded // not recorded // not recorded // inferred from electronic annotation // not recorded // not recorded // not recorded // inferred from electronic annotation // not recorded // not…	GO:0001618 // GO:0050839 // GO:0005515 // GO:0001618 // GO:0050839 // GO:0001618 // GO:0050839 // GO:0001618 // GO:0050839 // GO:0005515	viral receptor activity // cell adhesion molecule binding // protein binding // viral receptor activity // cell adhesion molecule binding // viral receptor activity // cell adhesion molecule binding // viral receptor activity // cell adhesion molecule binding // protein binding	inferred from mutant phenotype // not recorded // inferred from electronic annotation // inferred from mutant phenotype // not recorded // inferred from mutant phenotype // not recorded // inferred from mutant phenotype // not recorded // inferred from electronic annotation	---	---	Pfam // Pfam // Pfam // Pfam // Pfam // Pfam // Pfam // Pfam	IPR013098 // IPR013106 // IPR013151 // IPR013162 // IPR013098 // IPR013106 // IPR013151 // IPR013162	Immunoglobulin I-set // Immunoglobulin V-set // Immunoglobulin // CD80-like, immunoglobulin C2-set // Immunoglobulin I-set // Immunoglobulin V-set // Immunoglobulin // CD80-like, immunoglobulin C2-set	main	5.3476	5.58179	5.43796	6.16957	7.48716	6.59143
10733849	LOC24906	RoBo-1	0.0305027	0.438	14.76	36.19	2.43902	up	NM_031537 // ENSRNOT00000003797 // AF041083	RefSeq // ENSEMBL // GenBank	Rattus norvegicus RoBo-1 (LOC24906), mRNA. // cdna:known_by_projection chromosome:Rnor_5.0:10:43664047:43672276:1 gene:ENSRNOG00000002820 gene_biotype:protein_coding transcript_biotype:protein_coding // Rattus norvegicus RoBo-1 mRNA, complete cds.	chr10	+	44072418	44080785	GO:0046849 // GO:0046849 // GO:0046849	bone remodeling // bone remodeling // bone remodeling	inferred from expression pattern // inferred from expression pattern // inferred from expression pattern	GO:0005576 // GO:0005576 // GO:0005576	extracellular region // extracellular region // extracellular region	inferred from electronic annotation // inferred from electronic annotation // inferred from electronic annotation	---	---	---	---	---	Pfam	IPR001526	CD59 antigen	main	4.46429	3.83108	3.38223	4.13391	5.86906	5.58286
10785019	Slc39a14	solute carrier family 39 (zinc transporter), member 14	0.0091341	0.319	97.78	239.49	2.43902	up	NM_001107275 // ENSRNOT00000013067	RefSeq // ENSEMBL	Rattus norvegicus solute carrier family 39 (zinc transporter), member 14 (Slc39a14), mRNA. // cdna:known chromosome:Rnor_5.0:15:55707607:55752619:-1 gene:ENSRNOG00000009832 gene_biotype:protein_coding transcript_biotype:protein_coding	chr15	-	50706217	50723051	GO:0006826 // GO:0006829 // GO:0006882 // GO:0006882 // GO:0015684 // GO:0034755 // GO:0071577 // GO:0071578 // GO:0071578 // GO:0030001 // GO:0055085 // GO:0006826 // GO:0006829 // GO:0006882 // GO:0006882 // GO:0015684 // GO:0034755 // GO:0071577 // GO:0071578 // GO:0071578 // GO:0030001 // GO:0006826 // GO:0006829 // GO:0015684 // GO:0055085 // GO:0071577	iron ion transport // zinc ion transport // cellular zinc ion homeostasis // cellular zinc ion homeostasis // ferrous iron transport // iron ion transmembrane transport // zinc ion transmembrane transport // zinc ion transmembrane import // zinc ion transmembrane import // metal ion transport // transmembrane transport // iron ion transport // zinc ion transport // cellular zinc ion homeostasis /…	not recorded // not recorded // inferred from electronic annotation // not recorded // not recorded // not recorded // not recorded // inferred from electronic annotation // not recorded // inferred from electronic annotation // inferred from electronic annotation // not recorded // not recorded // inferred from electronic annotation // not recorded // not recorded // not recorded // not recorded…	GO:0005783 // GO:0005783 // GO:0005794 // GO:0005794 // GO:0005886 // GO:0005887 // GO:0005887 // GO:0016021 // GO:0016020 // GO:0005783 // GO:0005783 // GO:0005794 // GO:0005794 // GO:0005886 // GO:0005887 // GO:0005887 // GO:0016021 // GO:0005886 // GO:0016021 // GO:0016020	endoplasmic reticulum // endoplasmic reticulum // Golgi apparatus // Golgi apparatus // plasma membrane // integral to plasma membrane // integral to plasma membrane // integral to membrane // membrane // endoplasmic reticulum // endoplasmic reticulum // Golgi apparatus // Golgi apparatus // plasma membrane // integral to plasma membrane // integral to plasma membrane // integral to membrane // p…	inferred from electronic annotation // not recorded // inferred from electronic annotation // not recorded // not recorded // inferred from electronic annotation // not recorded // not recorded // inferred from electronic annotation // inferred from electronic annotation // not recorded // inferred from electronic annotation // not recorded // not recorded // inferred from electronic annotation /…	GO:0005385 // GO:0005385 // GO:0015093 // GO:0015093 // GO:0046873 // GO:0005385 // GO:0005385 // GO:0015093 // GO:0015093 // GO:0046873	zinc ion transmembrane transporter activity // zinc ion transmembrane transporter activity // ferrous iron transmembrane transporter activity // ferrous iron transmembrane transporter activity // metal ion transmembrane transporter activity // zinc ion transmembrane transporter activity // zinc ion transmembrane transporter activity // ferrous iron transmembrane transporter activity // ferrous ir…	inferred from electronic annotation // not recorded // inferred from electronic annotation // not recorded // inferred from electronic annotation // inferred from electronic annotation // not recorded // inferred from electronic annotation // not recorded // inferred from electronic annotation	---	---	Pfam	IPR003689	Zinc/iron permease	main	6.70954	6.63126	6.52101	7.53117	8.83716	7.39605
10819705	Lpar3	lysophosphatidic acid receptor 3	0.0006914	0.161	176.43	432.76	2.43902	up	ENSRNOT00000020656 // NM_023969 // AF097733	ENSEMBL // RefSeq // GenBank	cdna:known chromosome:Rnor_5.0:2:270634753:270679035:1 gene:ENSRNOG00000015260 gene_biotype:protein_coding transcript_biotype:protein_coding // Rattus norvegicus lysophosphatidic acid receptor 3 (Lpar3), mRNA. // Rattus norvegicus putative G protein-coupled receptor snGPCR32 mRNA, complete cds.	chr2	+	244431758	244510815	GO:0000187 // GO:0000187 // GO:0007186 // GO:0032060 // GO:0032060 // GO:0043410 // GO:0051482 // GO:0051928 // GO:0043410 // GO:0007165 // GO:0007186 // GO:0000187 // GO:0000187 // GO:0007186 // GO:0032060 // GO:0032060 // GO:0043410 // GO:0051482 // GO:0051928 // GO:0007165 // GO:0007186 // GO:0043410 // GO:0000187 // GO:0000187 // GO:0007186 // GO:0032060 // GO:0032060 // GO:0043410 // GO:0051…	activation of MAPK activity // activation of MAPK activity // G-protein coupled receptor signaling pathway // bleb assembly // bleb assembly // positive regulation of MAPK cascade // elevation of cytosolic calcium ion concentration involved in phospholipase C-activating G-protein coupled signaling pathway // positive regulation of calcium ion transport // positive regulation of MAPK cascade // si…	inferred from electronic annotation // not recorded // inferred from mutant phenotype // inferred from electronic annotation // not recorded // not recorded // inferred from direct assay // inferred from mutant phenotype // inferred from electronic annotation // inferred from electronic annotation // inferred from electronic annotation // inferred from electronic annotation // not recorded // inf…	GO:0005886 // GO:0005886 // GO:0016021 // GO:0043231 // GO:0043231 // GO:0016020 // GO:0005886 // GO:0005886 // GO:0016021 // GO:0043231 // GO:0043231 // GO:0016020 // GO:0005886 // GO:0005886 // GO:0016021 // GO:0043231 // GO:0043231 // GO:0016020	plasma membrane // plasma membrane // integral to membrane // intracellular membrane-bounded organelle // intracellular membrane-bounded organelle // membrane // plasma membrane // plasma membrane // integral to membrane // intracellular membrane-bounded organelle // intracellular membrane-bounded organelle // membrane // plasma membrane // plasma membrane // integral to membrane // intracellular…	inferred from electronic annotation // not recorded // inferred from electronic annotation // inferred from electronic annotation // not recorded // inferred from electronic annotation // inferred from electronic annotation // not recorded // inferred from electronic annotation // inferred from electronic annotation // not recorded // inferred from electronic annotation // inferred from electroni…	GO:0001965 // GO:0005543 // GO:0005543 // GO:0070915 // GO:0004871 // GO:0004930 // GO:0001965 // GO:0005543 // GO:0005543 // GO:0070915 // GO:0004871 // GO:0004930 // GO:0001965 // GO:0005543 // GO:0005543 // GO:0070915 // GO:0004871 // GO:0004930	G-protein alpha-subunit binding // phospholipid binding // phospholipid binding // lysophosphatidic acid receptor activity // signal transducer activity // G-protein coupled receptor activity // G-protein alpha-subunit binding // phospholipid binding // phospholipid binding // lysophosphatidic acid receptor activity // signal transducer activity // G-protein coupled receptor activity // G-protein…	inferred from mutant phenotype // inferred from direct assay // inferred from mutant phenotype // inferred from electronic annotation // inferred from electronic annotation // inferred from electronic annotation // inferred from mutant phenotype // inferred from direct assay // inferred from mutant phenotype // inferred from electronic annotation // inferred from electronic annotation // inferred…	---	---	Pfam	IPR000276	G protein-coupled receptor, rhodopsin-like	main	7.88596	7.15855	7.37178	9.12155	8.49854	8.70504
10832341	Slc19a1	solute carrier family 19 (folate transporter), member 1	2.89e-05	0.0527	120.19	292.61	2.43902	up	NM_017299 // NM_001035232 // ENSRNOT00000044212 // AF099010 // ENSRNOT00000065236	RefSeq // RefSeq // ENSEMBL // GenBank // ENSEMBL	Rattus norvegicus solute carrier family 19 (folate transporter), member 1 (Slc19a1), transcript variant 1, mRNA. // Rattus norvegicus solute carrier family 19 (folate transporter), member 1 (Slc19a1), transcript variant 2, mRNA. // cdna:known chromosome:Rnor_5.0:20:14497682:14509235:-1 gene:ENSRNOG00000001232 gene_biotype:protein_coding transcript_biotype:protein_coding // Rattus norvegicus bile …	chr20	-	11984152	12001865	GO:0007565 // GO:0015884 // GO:0051958 // GO:0006810 // GO:0007565 // GO:0015884 // GO:0051958 // GO:0006810 // GO:0007565 // GO:0015884 // GO:0051958 // GO:0006810 // GO:0055085 // GO:0007565 // GO:0015884 // GO:0051958 // GO:0006810 // GO:0007565 // GO:0015884 // GO:0051958 // GO:0006810	female pregnancy // folic acid transport // methotrexate transport // transport // female pregnancy // folic acid transport // methotrexate transport // transport // female pregnancy // folic acid transport // methotrexate transport // transport // transmembrane transport // female pregnancy // folic acid transport // methotrexate transport // transport // female pregnancy // folic acid transport…	inferred from expression pattern // inferred from direct assay // inferred from direct assay // inferred from electronic annotation // inferred from expression pattern // inferred from direct assay // inferred from direct assay // inferred from electronic annotation // inferred from expression pattern // inferred from direct assay // inferred from direct assay // inferred from electronic annotati…	GO:0005886 // GO:0016020 // GO:0016021 // GO:0016323 // GO:0031526 // GO:0005886 // GO:0016020 // GO:0016021 // GO:0016323 // GO:0031526 // GO:0005886 // GO:0016020 // GO:0016021 // GO:0016323 // GO:0031526 // GO:0005886 // GO:0016020 // GO:0016021 // GO:0016323 // GO:0031526 // GO:0005886 // GO:0016020 // GO:0016021 // GO:0016323 // GO:0031526	plasma membrane // membrane // integral to membrane // basolateral plasma membrane // brush border membrane // plasma membrane // membrane // integral to membrane // basolateral plasma membrane // brush border membrane // plasma membrane // membrane // integral to membrane // basolateral plasma membrane // brush border membrane // plasma membrane // membrane // integral to membrane // basolateral…	inferred from direct assay // inferred from electronic annotation // inferred from electronic annotation // inferred from direct assay // inferred from direct assay // inferred from direct assay // inferred from electronic annotation // inferred from electronic annotation // inferred from direct assay // inferred from direct assay // inferred from direct assay // inferred from electronic annotati…	GO:0005542 // GO:0005542 // GO:0008517 // GO:0008518 // GO:0008518 // GO:0015350 // GO:0005542 // GO:0005542 // GO:0008517 // GO:0008518 // GO:0008518 // GO:0015350 // GO:0005542 // GO:0005542 // GO:0008517 // GO:0008518 // GO:0008518 // GO:0015350 // GO:0005542 // GO:0005542 // GO:0008517 // GO:0008518 // GO:0008518 // GO:0015350 // GO:0005542 // GO:0005542 // GO:0008517 // GO:0008518 // GO:0008…	folic acid binding // folic acid binding // folic acid transporter activity // reduced folate carrier activity // reduced folate carrier activity // methotrexate transporter activity // folic acid binding // folic acid binding // folic acid transporter activity // reduced folate carrier activity // reduced folate carrier activity // methotrexate transporter activity // folic acid binding // folic…	inferred from direct assay // inferred from electronic annotation // inferred from direct assay // inferred from direct assay // inferred from electronic annotation // inferred from direct assay // inferred from direct assay // inferred from electronic annotation // inferred from direct assay // inferred from direct assay // inferred from electronic annotation // inferred from direct assay // inf…	---	---	Pfam // Pfam // Pfam	IPR002666 // IPR011701 // IPR002666	Reduced folate carrier // Major facilitator superfamily // Reduced folate carrier	main	6.74706	7.03335	6.97473	8.2852	8.36096	7.98521
10755140	Hrg	histidine-rich glycoprotein	0.0467353	0.495	66.86	157.53	2.38095	up	NM_133428 // BC089779	RefSeq // GenBank	Rattus norvegicus histidine-rich glycoprotein (Hrg), mRNA. // Rattus norvegicus histidine-rich glycoprotein, mRNA (cDNA clone MGC:108609 IMAGE:7371893), complete cds.	chr11	-	80230593	80264179	GO:0002839 // GO:0002839 // GO:0007162 // GO:0007162 // GO:0008285 // GO:0008285 // GO:0010468 // GO:0010468 // GO:0010543 // GO:0010543 // GO:0010593 // GO:0010593 // GO:0010951 // GO:0016525 // GO:0016525 // GO:0030168 // GO:0030168 // GO:0030193 // GO:0030193 // GO:0030308 // GO:0030308 // GO:0032956 // GO:0032956 // GO:0033629 // GO:0033629 // GO:0042730 // GO:0043065 // GO:0043065 // GO:0043…	positive regulation of immune response to tumor cell // positive regulation of immune response to tumor cell // negative regulation of cell adhesion // negative regulation of cell adhesion // negative regulation of cell proliferation // negative regulation of cell proliferation // regulation of gene expression // regulation of gene expression // regulation of platelet activation // regulation of …	not recorded // inferred from sequence or structural similarity // not recorded // inferred from sequence or structural similarity // not recorded // inferred from sequence or structural similarity // not recorded // inferred from sequence or structural similarity // not recorded // inferred from sequence or structural similarity // not recorded // inferred from sequence or structural similarity …	GO:0005576 // GO:0005576 // GO:0005575 // GO:0005576 // GO:0005576 // GO:0005575	extracellular region // extracellular region // cellular_component // extracellular region // extracellular region // cellular_component	inferred from electronic annotation // not recorded // no biological data available // inferred from electronic annotation // not recorded // no biological data available	GO:0004867 // GO:0004867 // GO:0004869 // GO:0008201 // GO:0008201 // GO:0008270 // GO:0008270 // GO:0019865 // GO:0019865 // GO:0020037 // GO:0020037 // GO:0043395 // GO:0043395 // GO:0046872 // GO:0046872 // GO:0003674 // GO:0008201 // GO:0008270 // GO:0019865 // GO:0020037 // GO:0043395 // GO:0046872 // GO:0004867 // GO:0004867 // GO:0004869 // GO:0008201 // GO:0008201 // GO:0008270 // GO:0008…	serine-type endopeptidase inhibitor activity // serine-type endopeptidase inhibitor activity // cysteine-type endopeptidase inhibitor activity // heparin binding // heparin binding // zinc ion binding // zinc ion binding // immunoglobulin binding // immunoglobulin binding // heme binding // heme binding // heparan sulfate proteoglycan binding // heparan sulfate proteoglycan binding // metal ion b…	inferred from electronic annotation // not recorded // inferred from electronic annotation // not recorded // inferred from sequence or structural similarity // not recorded // inferred from sequence or structural similarity // not recorded // inferred from sequence or structural similarity // not recorded // inferred from sequence or structural similarity // not recorded // inferred from sequenc…	---	---	---	---	---	main	6.94085	6.31882	4.95711	6.68657	7.63974	7.6249
10764016	Ren	renin	0.0022435	0.199	53.72	127.88	2.38095	up	ENSRNOT00000003951 // NM_012642 // J02941	ENSEMBL // RefSeq // GenBank	cdna:known chromosome:Rnor_5.0:13:55555587:55566981:-1 gene:ENSRNOG00000002937 gene_biotype:protein_coding transcript_biotype:protein_coding // Rattus norvegicus renin (Ren), mRNA. // Rat renin mRNA, complete cds.	chr13	+	46262738	46275213	GO:0001822 // GO:0001823 // GO:0002003 // GO:0002003 // GO:0002016 // GO:0002018 // GO:0002018 // GO:0006508 // GO:0006508 // GO:0006950 // GO:0008065 // GO:0008217 // GO:0008217 // GO:0008584 // GO:0009755 // GO:0009755 // GO:0010033 // GO:0032496 // GO:0035690 // GO:0042493 // GO:0042756 // GO:0042756 // GO:0043408 // GO:0043408 // GO:0048469 // GO:0048469 // GO:0050435 // GO:0051591 // GO:0070…	kidney development // mesonephros development // angiotensin maturation // angiotensin maturation // regulation of blood volume by renin-angiotensin // renin-angiotensin regulation of aldosterone production // renin-angiotensin regulation of aldosterone production // proteolysis // proteolysis // response to stress // establishment of blood-nerve barrier // regulation of blood pressure // regulat…	not recorded // inferred from electronic annotation // inferred from direct assay // not recorded // not recorded // inferred from electronic annotation // not recorded // inferred from electronic annotation // not recorded // inferred from direct assay // not recorded // inferred from mutant phenotype // traceable author statement // inferred from electronic annotation // inferred from electroni…	GO:0005615 // GO:0005615 // GO:0005622 // GO:0016020 // GO:0044444 // GO:0005622 // GO:0005615 // GO:0005576 // GO:0005615 // GO:0005615 // GO:0005622 // GO:0016020 // GO:0044444 // GO:0005576 // GO:0005615 // GO:0005615 // GO:0005615 // GO:0005622 // GO:0016020 // GO:0044444 // GO:0005576 // GO:0005615	extracellular space // extracellular space // intracellular // membrane // cytoplasmic part // intracellular // extracellular space // extracellular region // extracellular space // extracellular space // intracellular // membrane // cytoplasmic part // extracellular region // extracellular space // extracellular space // extracellular space // intracellular // membrane // cytoplasmic part // ext…	inferred from direct assay // not recorded // not recorded // inferred from electronic annotation // inferred from direct assay // inferred from electronic annotation // inferred from electronic annotation // inferred from electronic annotation // inferred from direct assay // not recorded // not recorded // inferred from electronic annotation // inferred from direct assay // inferred from electr…	GO:0004175 // GO:0004175 // GO:0004190 // GO:0004190 // GO:0005102 // GO:0005102 // GO:0005159 // GO:0008233 // GO:0004175 // GO:0008233 // GO:0005102 // GO:0016787 // GO:0004175 // GO:0004175 // GO:0004190 // GO:0004190 // GO:0005102 // GO:0005102 // GO:0005159 // GO:0008233 // GO:0005102 // GO:0008233 // GO:0016787 // GO:0004175 // GO:0004175 // GO:0004190 // GO:0004190 // GO:0005102 // GO:0005…	endopeptidase activity // endopeptidase activity // aspartic-type endopeptidase activity // aspartic-type endopeptidase activity // receptor binding // receptor binding // insulin-like growth factor receptor binding // peptidase activity // endopeptidase activity // peptidase activity // receptor binding // hydrolase activity // endopeptidase activity // endopeptidase activity // aspartic-type en…	inferred from direct assay // not recorded // inferred from electronic annotation // not recorded // inferred from physical interaction // not recorded // inferred from direct assay // not recorded // inferred from electronic annotation // inferred from electronic annotation // inferred from electronic annotation // inferred from electronic annotation // inferred from direct assay // not recorded…	---	---	Pfam // Pfam	IPR001461 // IPR012848	Peptidase A1 // Propeptide, peptidase A1	main	5.95902	5.90909	5.4018	6.45489	7.2462	7.34776
10768412	Prg4	proteoglycan 4	0.0279983	0.428	32.14	76.55	2.38095	up	NM_001105962 // ENSRNOT00000068148	RefSeq // ENSEMBL	Rattus norvegicus proteoglycan 4, (megakaryocyte stimulating factor, articular superficial zone protein, camptodactyly, arthropathy, coxa vara, pericarditis syndrome) (Prg4), mRNA. // cdna:known chromosome:Rnor_5.0:13:72637409:72653723:-1 gene:ENSRNOG00000002385 gene_biotype:protein_coding transcript_biotype:protein_coding	chr13	-	64753606	64769115	GO:0006955 // GO:0042127 // GO:0045409 // GO:0071425 // GO:0006955 // GO:0042127 // GO:0045409 // GO:0071425	immune response // regulation of cell proliferation // negative regulation of interleukin-6 biosynthetic process // hematopoietic stem cell proliferation // immune response // regulation of cell proliferation // negative regulation of interleukin-6 biosynthetic process // hematopoietic stem cell proliferation	inferred from electronic annotation // not recorded // not recorded // not recorded // inferred from electronic annotation // not recorded // not recorded // not recorded	GO:0005615 // GO:0005615	extracellular space // extracellular space	not recorded // not recorded	GO:0005044 // GO:0030247 // GO:0046872 // GO:0005044 // GO:0030247 // GO:0046872	scavenger receptor activity // polysaccharide binding // metal ion binding // scavenger receptor activity // polysaccharide binding // metal ion binding	inferred from electronic annotation // inferred from electronic annotation // inferred from electronic annotation // inferred from electronic annotation // inferred from electronic annotation // inferred from electronic annotation	---	---	Pfam // Pfam	IPR001212 // IPR018487	Somatomedin B domain // Hemopexin-like repeats	main	5.93919	4.7512	4.35537	5.63921	6.80745	6.38146
10862403	Rarres2	retinoic acid receptor responder (tazarotene induced) 2	0.0173376	0.388	174	409.86	2.38095	up	NM_001013427 // ENSRNOT00000033918 // BC091177	RefSeq // ENSEMBL // GenBank	Rattus norvegicus retinoic acid receptor responder (tazarotene induced) 2 (Rarres2), mRNA. // cdna:known chromosome:Rnor_5.0:4:142869496:142872500:-1 gene:ENSRNOG00000024705 gene_biotype:protein_coding transcript_biotype:protein_coding // Rattus norvegicus retinoic acid receptor responder (tazarotene induced) 2, mRNA (cDNA clone MGC:108804 IMAGE:7323591), complete cds.	chr4	-	76659507	76662465	GO:0001523 // GO:0001523 // GO:0001701 // GO:0001701 // GO:0010759 // GO:0010759 // GO:0048566 // GO:0048566 // GO:0050873 // GO:0050873 // GO:0001523 // GO:0001523 // GO:0001701 // GO:0001701 // GO:0010759 // GO:0010759 // GO:0048566 // GO:0048566 // GO:0050873 // GO:0050873 // GO:0001523 // GO:0001523 // GO:0001701 // GO:0001701 // GO:0010759 // GO:0010759 // GO:0048566 // GO:0048566 // GO:0050…	retinoid metabolic process // retinoid metabolic process // in utero embryonic development // in utero embryonic development // positive regulation of macrophage chemotaxis // positive regulation of macrophage chemotaxis // embryonic digestive tract development // embryonic digestive tract development // brown fat cell differentiation // brown fat cell differentiation // retinoid metabolic proces…	inferred from electronic annotation // not recorded // inferred from electronic annotation // not recorded // inferred from electronic annotation // not recorded // inferred from electronic annotation // not recorded // inferred from electronic annotation // not recorded // inferred from electronic annotation // not recorded // inferred from electronic annotation // not recorded // inferred from …	GO:0031012 // GO:0031012 // GO:0031012 // GO:0031012 // GO:0031012 // GO:0031012	extracellular matrix // extracellular matrix // extracellular matrix // extracellular matrix // extracellular matrix // extracellular matrix	inferred from electronic annotation // not recorded // inferred from electronic annotation // not recorded // inferred from electronic annotation // not recorded	GO:0005102 // GO:0005102 // GO:0005102 // GO:0005102 // GO:0005515 // GO:0005102 // GO:0005102	receptor binding // receptor binding // receptor binding // receptor binding // protein binding // receptor binding // receptor binding	inferred from electronic annotation // not recorded // inferred from electronic annotation // not recorded // inferred from electronic annotation // inferred from electronic annotation // not recorded	---	---	---	---	---	main	8.03964	7.68056	6.63614	8.70045	9.18797	8.2014
10871087	Cyp4a1	cytochrome P450, family 4, subfamily a, polypeptide 1	0.0164568	0.387	344.99	814.74	2.38095	up	NM_175837 // ENSRNOT00000012888 // BC089761 // M14972 // ENSRNOT00000051385 // ENSRNOT00000057095 // GENSCAN00000036157	RefSeq // ENSEMBL // GenBank // GenBank // ENSEMBL // ENSEMBL // ENSEMBL	Rattus norvegicus cytochrome P450, family 4, subfamily a, polypeptide 1 (Cyp4a1), mRNA. // cdna:known chromosome:Rnor_5.0:5:138283579:138297977:1 gene:ENSRNOG00000009597 gene_biotype:protein_coding transcript_biotype:protein_coding // Rattus norvegicus cytochrome P450, family 4, subfamily a, polypeptide 1, mRNA (cDNA clone MGC:108515 IMAGE:7324500), complete cds. // Rat cytochrome P-450-LA-omega …	chr5	+	135901624	135915754	GO:0001676 // GO:0001822 // GO:0001890 // GO:0003091 // GO:0003095 // GO:0006691 // GO:0019369 // GO:0019369 // GO:0019373 // GO:0032305 // GO:0036101 // GO:0043651 // GO:0046456 // GO:0048252 // GO:0055078 // GO:0055114 // GO:0055114 // GO:0001676 // GO:0001822 // GO:0001890 // GO:0003091 // GO:0003095 // GO:0006691 // GO:0019369 // GO:0019369 // GO:0019373 // GO:0032305 // GO:0036101 // GO:0043…	long-chain fatty acid metabolic process // kidney development // placenta development // renal water homeostasis // pressure natriuresis // leukotriene metabolic process // arachidonic acid metabolic process // arachidonic acid metabolic process // epoxygenase P450 pathway // positive regulation of icosanoid secretion // leukotriene B4 catabolic process // linoleic acid metabolic process // icosa…	not recorded // inferred from expression pattern // inferred from expression pattern // not recorded // not recorded // not recorded // inferred from mutant phenotype // not recorded // not recorded // not recorded // not recorded // inferred from direct assay // inferred from mutant phenotype // inferred from direct assay // not recorded // not recorded // inferred from electronic annotation // …	GO:0005737 // GO:0005789 // GO:0016324 // GO:0043231 // GO:0043231 // GO:0005783 // GO:0016020 // GO:0031090 // GO:0043231 // GO:0005737 // GO:0005789 // GO:0016324 // GO:0043231 // GO:0043231 // GO:0005783 // GO:0016020 // GO:0031090 // GO:0043231 // GO:0005737 // GO:0005789 // GO:0016324 // GO:0043231 // GO:0043231 // GO:0005783 // GO:0016020 // GO:0031090 // GO:0043231 // GO:0005783 // GO:0005…	cytoplasm // endoplasmic reticulum membrane // apical plasma membrane // intracellular membrane-bounded organelle // intracellular membrane-bounded organelle // endoplasmic reticulum // membrane // organelle membrane // intracellular membrane-bounded organelle // cytoplasm // endoplasmic reticulum membrane // apical plasma membrane // intracellular membrane-bounded organelle // intracellular memb…	not recorded // inferred from electronic annotation // not recorded // inferred from direct assay // not recorded // inferred from electronic annotation // inferred from electronic annotation // inferred from electronic annotation // inferred from electronic annotation // not recorded // inferred from electronic annotation // not recorded // inferred from direct assay // not recorded // inferred …	GO:0004497 // GO:0005506 // GO:0008391 // GO:0008391 // GO:0008392 // GO:0009055 // GO:0016705 // GO:0018685 // GO:0018685 // GO:0020037 // GO:0050051 // GO:0052869 // GO:0016491 // GO:0018685 // GO:0046872 // GO:0004497 // GO:0005506 // GO:0008391 // GO:0008391 // GO:0008392 // GO:0009055 // GO:0016705 // GO:0018685 // GO:0018685 // GO:0020037 // GO:0050051 // GO:0052869 // GO:0016491 // GO:0018…	monooxygenase activity // iron ion binding // arachidonic acid monooxygenase activity // arachidonic acid monooxygenase activity // arachidonic acid epoxygenase activity // electron carrier activity // oxidoreductase activity, acting on paired donors, with incorporation or reduction of molecular oxygen // alkane 1-monooxygenase activity // alkane 1-monooxygenase activity // heme binding // leukot…	inferred from electronic annotation // inferred from electronic annotation // inferred from direct assay // inferred from mutant phenotype // not recorded // inferred from electronic annotation // inferred from electronic annotation // inferred from mutant phenotype // not recorded // inferred from electronic annotation // not recorded // inferred from electronic annotation // inferred from elect…	---	---	Pfam // Pfam // Pfam	IPR001128 // IPR001128 // IPR001128	Cytochrome P450 // Cytochrome P450 // Cytochrome P450	main	9.3285	8.27108	7.71918	9.99003	9.31539	9.75803
10731512	Socs1	suppressor of cytokine signaling 1	0.0003207	0.133	73.84	170.51	2.32558	up	NM_145879 // ENSRNOT00000003458	RefSeq // ENSEMBL	Rattus norvegicus suppressor of cytokine signaling 1 (Socs1), mRNA. // cdna:known chromosome:Rnor_5.0:10:3782936:3783574:1 gene:ENSRNOG00000002568 gene_biotype:protein_coding transcript_biotype:protein_coding	chr10	+	4819971	4820609	GO:0001932 // GO:0007259 // GO:0007259 // GO:0009968 // GO:0016567 // GO:0019221 // GO:0019221 // GO:0031100 // GO:0032355 // GO:0032496 // GO:0032570 // GO:0034097 // GO:0035556 // GO:0040008 // GO:0042493 // GO:0042518 // GO:0042518 // GO:0043086 // GO:0043434 // GO:0045444 // GO:0045444 // GO:0046426 // GO:0046627 // GO:0046627 // GO:0071230 // GO:0071230 // GO:0001932 // GO:0007259 // GO:0007…	regulation of protein phosphorylation // JAK-STAT cascade // JAK-STAT cascade // negative regulation of signal transduction // protein ubiquitination // cytokine-mediated signaling pathway // cytokine-mediated signaling pathway // organ regeneration // response to estradiol stimulus // response to lipopolysaccharide // response to progesterone stimulus // response to cytokine stimulus // intracel…	not recorded // inferred from electronic annotation // not recorded // inferred from electronic annotation // inferred from electronic annotation // inferred from electronic annotation // not recorded // inferred from expression pattern // inferred from expression pattern // inferred from expression pattern // inferred from expression pattern // inferred from expression pattern // inferred from e…	GO:0005634 // GO:0016023 // GO:0005575 // GO:0031410 // GO:0005634 // GO:0016023 // GO:0005622	nucleus // cytoplasmic membrane-bounded vesicle // cellular_component // cytoplasmic vesicle // nucleus // cytoplasmic membrane-bounded vesicle // intracellular	inferred from electronic annotation // inferred from electronic annotation // no biological data available // inferred from electronic annotation // inferred from electronic annotation // inferred from electronic annotation // inferred from electronic annotation	GO:0005159 // GO:0005159 // GO:0019210 // GO:0019210 // GO:0019901 // GO:0019901 // GO:0003674 // GO:0005159 // GO:0005159 // GO:0019210 // GO:0019210 // GO:0019901 // GO:0019901 // GO:0005515	insulin-like growth factor receptor binding // insulin-like growth factor receptor binding // kinase inhibitor activity // kinase inhibitor activity // protein kinase binding // protein kinase binding // molecular_function // insulin-like growth factor receptor binding // insulin-like growth factor receptor binding // kinase inhibitor activity // kinase inhibitor activity // protein kinase bindin…	inferred from electronic annotation // not recorded // inferred from electronic annotation // not recorded // inferred from electronic annotation // not recorded // no biological data available // inferred from electronic annotation // not recorded // inferred from electronic annotation // not recorded // inferred from electronic annotation // not recorded // inferred from electronic annotation	---	---	Pfam // Pfam	IPR000980 // IPR001496	SH2 domain // SOCS protein, C-terminal	main	6.06159	6.57758	6.0073	7.19118	7.55207	7.55067
10757189	Azgp1	alpha-2-glycoprotein 1, zinc-binding	0.0064973	0.287	109.97	258.24	2.32558	up	ENSRNOT00000001801 // NM_012826 // BC091166	ENSEMBL // RefSeq // GenBank	cdna:known chromosome:Rnor_5.0:12:21255662:21263727:1 gene:ENSRNOG00000001333 gene_biotype:protein_coding transcript_biotype:protein_coding // Rattus norvegicus alpha-2-glycoprotein 1, zinc-binding (Azgp1), mRNA. // Rattus norvegicus alpha-2-glycoprotein 1, zinc-binding, mRNA (cDNA clone IMAGE:7372197), with apparent retained intron.	chr12	+	17492908	17498949	GO:0006955 // GO:0007155 // GO:0007155 // GO:0019882 // GO:0001916 // GO:0002474 // GO:0019882 // GO:0006955 // GO:0007155 // GO:0007155 // GO:0019882 // GO:0001916 // GO:0002474 // GO:0019882 // GO:0006955 // GO:0007155 // GO:0007155 // GO:0019882 // GO:0001916 // GO:0002474 // GO:0019882	immune response // cell adhesion // cell adhesion // antigen processing and presentation // positive regulation of T cell mediated cytotoxicity // antigen processing and presentation of peptide antigen via MHC class I // antigen processing and presentation // immune response // cell adhesion // cell adhesion // antigen processing and presentation // positive regulation of T cell mediated cytotoxi…	inferred from electronic annotation // not recorded // inferred from sequence or structural similarity // inferred from electronic annotation // inferred from electronic annotation // inferred from electronic annotation // --- // inferred from electronic annotation // not recorded // inferred from sequence or structural similarity // inferred from electronic annotation // inferred from electronic…	GO:0005615 // GO:0042612 // GO:0016020 // GO:0005576 // GO:0005886 // GO:0005615 // GO:0042612 // GO:0005576 // GO:0005886 // GO:0016020 // GO:0005615 // GO:0042612 // GO:0005576 // GO:0005886 // GO:0016020	extracellular space // MHC class I protein complex // membrane // extracellular region // plasma membrane // extracellular space // MHC class I protein complex // extracellular region // plasma membrane // membrane // extracellular space // MHC class I protein complex // extracellular region // plasma membrane // membrane	traceable author statement // inferred from electronic annotation // inferred from electronic annotation // inferred from electronic annotation // --- // traceable author statement // inferred from electronic annotation // inferred from electronic annotation // --- // inferred from electronic annotation // traceable author statement // inferred from electronic annotation // inferred from electron…	GO:0005515 // GO:0042605 // GO:0003823 // GO:0003823 // GO:0042605 // GO:0003823 // GO:0042605	protein binding // peptide antigen binding // antigen binding // antigen binding // peptide antigen binding // antigen binding // peptide antigen binding	inferred from electronic annotation // inferred from electronic annotation // --- // --- // inferred from electronic annotation // --- // inferred from electronic annotation	---	---	Pfam // Pfam	IPR001039 // IPR003597	MHC class I, alpha chain, alpha1/alpha2 // Immunoglobulin C1-set	main	6.68101	6.61191	7.07763	7.36294	7.9871	8.74046
10759636	Pet100	PET100 homolog (S. cerevisiae)	1.26e-05	0.0313	234.08	543.09	2.32558	up	NM_001195245 // ENSRNOT00000071928	RefSeq // ENSEMBL	Rattus norvegicus PET100 homolog (S. cerevisiae) (Pet100), mRNA. // cdna:known chromosome:Rnor_5.0:12:4332962:4335583:1 gene:ENSRNOG00000050169 gene_biotype:protein_coding transcript_biotype:protein_coding	chr12	-	2531772	2533427	---	---	---	---	---	---	---	---	---	---	---	Pfam	IPR018625	Protein of unknown function DUF2346	main	7.91979	7.97427	7.74605	9.11531	8.95397	9.23874
10772784	RGD1563065	similar to 3110047P20Rik protein	0.0150657	0.37	26.25	61.35	2.32558	up	XM_223426 // ENSRNOT00000002978 // GENSCAN00000007234	RefSeq // ENSEMBL // ENSEMBL	PREDICTED: Rattus norvegicus leucine-rich repeat and WD repeat-containing protein KIAA1239-like (RGD1563065), mRNA. // cdna:known chromosome:Rnor_5.0:14:45938969:46347907:-1 gene:ENSRNOG00000002190 gene_biotype:protein_coding transcript_biotype:protein_coding // cdna:genscan chromosome:Rnor_5.0:14:45938969:45961686:-1 transcript_biotype:protein_coding	chr14	+	47022091	47028263	---	---	---	---	---	---	GO:0005515	protein binding	inferred from electronic annotation	---	---	---	---	---	main	4.43489	4.45995	5.27484	5.44682	6.78339	5.6397
10825100	Car14	carbonic anhydrase 14	0.0425511	0.48	73.77	169.76	2.32558	up	NM_001109655 // ENSRNOT00000025523 // EF187253	RefSeq // ENSEMBL // GenBank	Rattus norvegicus carbonic anhydrase 14 (Car14), mRNA. // cdna:known chromosome:Rnor_5.0:2:217500706:217507185:-1 gene:ENSRNOG00000023162 gene_biotype:protein_coding transcript_biotype:protein_coding // Rattus norvegicus membrane-bound carbonic anhydrase 14 mRNA, complete cds.	chr2	-	190683387	190690466	---	---	---	---	---	---	---	---	---	---	---	Pfam	IPR001148	Alpha carbonic anhydrase	main	7.15841	6.10284	5.38119	8.15159	6.94122	7.182
10832197	Sik1	salt-inducible kinase 1	0.0068771	0.294	174.13	403.48	2.32558	up	NM_021693 // ENSRNOT00000001579 // AF106937	RefSeq // ENSEMBL // GenBank	Rattus norvegicus salt-inducible kinase 1 (Sik1), mRNA. // cdna:known chromosome:Rnor_5.0:20:12845510:12855040:-1 gene:ENSRNOG00000001189 gene_biotype:protein_coding transcript_biotype:protein_coding // Rattus norvegicus protein kinase KID2 (Kid2) mRNA, complete cds.	chr20	-	10280194	10291787	GO:0000122 // GO:0002028 // GO:0006468 // GO:0006468 // GO:0006468 // GO:0007049 // GO:0007243 // GO:0007243 // GO:0007346 // GO:0007346 // GO:0010830 // GO:0010830 // GO:0010868 // GO:0010868 // GO:0032792 // GO:0032792 // GO:0043276 // GO:0043276 // GO:0045595 // GO:0045721 // GO:0045721 // GO:0046777 // GO:0046777 // GO:0055007 // GO:0055007 // GO:2000210 // GO:2000210 // GO:0006468 // GO:0007…	negative regulation of transcription from RNA polymerase II promoter // regulation of sodium ion transport // protein phosphorylation // protein phosphorylation // protein phosphorylation // cell cycle // intracellular protein kinase cascade // intracellular protein kinase cascade // regulation of mitotic cell cycle // regulation of mitotic cell cycle // regulation of myotube differentiation // r…	inferred from mutant phenotype // inferred from direct assay // inferred from mutant phenotype // not recorded // inferred from sequence or structural similarity // inferred from electronic annotation // not recorded // inferred from sequence or structural similarity // not recorded // inferred from sequence or structural similarity // not recorded // inferred from sequence or structural similari…	GO:0005634 // GO:0005634 // GO:0005634 // GO:0005737 // GO:0005737 // GO:0005829 // GO:0005634 // GO:0005737 // GO:0005634 // GO:0005634 // GO:0005634 // GO:0005737 // GO:0005737 // GO:0005829 // GO:0005634 // GO:0005737 // GO:0005634 // GO:0005634 // GO:0005634 // GO:0005737 // GO:0005737 // GO:0005829 // GO:0005634 // GO:0005737	nucleus // nucleus // nucleus // cytoplasm // cytoplasm // cytosol // nucleus // cytoplasm // nucleus // nucleus // nucleus // cytoplasm // cytoplasm // cytosol // nucleus // cytoplasm // nucleus // nucleus // nucleus // cytoplasm // cytoplasm // cytosol // nucleus // cytoplasm	inferred from direct assay // not recorded // inferred from sequence or structural similarity // not recorded // inferred from sequence or structural similarity // inferred from direct assay // inferred from electronic annotation // inferred from electronic annotation // inferred from direct assay // not recorded // inferred from sequence or structural similarity // not recorded // inferred from …	GO:0000287 // GO:0000287 // GO:0004674 // GO:0004674 // GO:0004674 // GO:0005515 // GO:0005524 // GO:0005524 // GO:0008140 // GO:0008140 // GO:0019901 // GO:0019901 // GO:0042826 // GO:0042826 // GO:0071889 // GO:0071889 // GO:0000166 // GO:0000287 // GO:0004672 // GO:0004674 // GO:0005524 // GO:0008140 // GO:0016301 // GO:0016740 // GO:0016772 // GO:0019901 // GO:0046872 // GO:0071889 // GO:0000…	magnesium ion binding // magnesium ion binding // protein serine/threonine kinase activity // protein serine/threonine kinase activity // protein serine/threonine kinase activity // protein binding // ATP binding // ATP binding // cAMP response element binding protein binding // cAMP response element binding protein binding // protein kinase binding // protein kinase binding // histone deacetylas…	not recorded // inferred from sequence or structural similarity // inferred from direct assay // inferred from mutant phenotype // not recorded // inferred from physical interaction // not recorded // inferred from sequence or structural similarity // not recorded // inferred from sequence or structural similarity // inferred from physical interaction // not recorded // inferred from electronic a…	---	---	Pfam // Pfam	IPR000719 // IPR001245	Protein kinase, catalytic domain // Serine-threonine/tyrosine-protein kinase catalytic domain	main	6.69454	8.11063	7.55438	8.71428	8.50847	8.79919
10849841	Il1b	interleukin 1 beta	0.0072292	0.298	57.21	134.31	2.32558	up	NM_031512 // ENSRNOT00000006308 // M98820	RefSeq // ENSEMBL // GenBank	Rattus norvegicus interleukin 1 beta (Il1b), mRNA. // cdna:known chromosome:Rnor_5.0:3:128133909:128140349:1 gene:ENSRNOG00000004649 gene_biotype:protein_coding transcript_biotype:protein_coding // Rat interleukin 1-beta mRNA, complete cds.	chr3	-	116964422	116970887	GO:0000122 // GO:0000165 // GO:0000165 // GO:0000187 // GO:0000187 // GO:0001660 // GO:0001660 // GO:0001666 // GO:0001934 // GO:0002439 // GO:0006144 // GO:0006954 // GO:0006954 // GO:0006955 // GO:0007204 // GO:0007568 // GO:0007584 // GO:0007611 // GO:0007613 // GO:0008210 // GO:0008285 // GO:0008285 // GO:0009100 // GO:0009408 // GO:0009743 // GO:0010193 // GO:0010243 // GO:0010332 // GO:0010…	negative regulation of transcription from RNA polymerase II promoter // MAPK cascade // MAPK cascade // activation of MAPK activity // activation of MAPK activity // fever generation // fever generation // response to hypoxia // positive regulation of protein phosphorylation // chronic inflammatory response to antigenic stimulus // purine nucleobase metabolic process // inflammatory response // i…	inferred from direct assay // inferred from electronic annotation // not recorded // inferred from electronic annotation // not recorded // inferred from electronic annotation // inferred from expression pattern // inferred from expression pattern // not recorded // inferred from expression pattern // inferred from expression pattern // inferred from expression pattern // not recorded // inferred…	GO:0005576 // GO:0005615 // GO:0005615 // GO:0005615 // GO:0030141 // GO:0030141 // GO:0031982 // GO:0005576 // GO:0031982 // GO:0005576 // GO:0005615 // GO:0005615 // GO:0005615 // GO:0030141 // GO:0030141 // GO:0031982 // GO:0031982 // GO:0005576 // GO:0005576 // GO:0005615 // GO:0005615 // GO:0005615 // GO:0030141 // GO:0030141 // GO:0031982 // GO:0005576 // GO:0031982	extracellular region // extracellular space // extracellular space // extracellular space // secretory granule // secretory granule // vesicle // extracellular region // vesicle // extracellular region // extracellular space // extracellular space // extracellular space // secretory granule // secretory granule // vesicle // vesicle // extracellular region // extracellular region // extracellular…	not recorded // inferred from direct assay // inferred from electronic annotation // not recorded // inferred from electronic annotation // not recorded // not recorded // inferred from electronic annotation // inferred from electronic annotation // not recorded // inferred from direct assay // inferred from electronic annotation // not recorded // inferred from electronic annotation // not recor…	GO:0005125 // GO:0005125 // GO:0005125 // GO:0005125 // GO:0005149 // GO:0008083 // GO:0019904 // GO:0019904 // GO:0005102 // GO:0005125 // GO:0005125 // GO:0005125 // GO:0005125 // GO:0005149 // GO:0008083 // GO:0019904 // GO:0019904 // GO:0005102 // GO:0005125 // GO:0005125 // GO:0005125 // GO:0005125 // GO:0005149 // GO:0008083 // GO:0019904 // GO:0019904 // GO:0005102	cytokine activity // cytokine activity // cytokine activity // cytokine activity // interleukin-1 receptor binding // growth factor activity // protein domain specific binding // protein domain specific binding // receptor binding // cytokine activity // cytokine activity // cytokine activity // cytokine activity // interleukin-1 receptor binding // growth factor activity // protein domain specif…	inferred from direct assay // inferred from electronic annotation // not recorded // traceable author statement // inferred from electronic annotation // inferred from electronic annotation // inferred from electronic annotation // not recorded // inferred from electronic annotation // inferred from direct assay // inferred from electronic annotation // not recorded // traceable author statement …	GenMAPP // GenMAPP // GenMAPP // GenMAPP // GenMAPP // GenMAPP	Inflammatory_Response_Pathway // Smooth_muscle_contraction // Inflammatory_Response_Pathway // Smooth_muscle_contraction // Inflammatory_Response_Pathway // Smooth_muscle_contraction	Pfam // Pfam	IPR000975 // IPR003502	Interleukin-1 // Interleukin-1 propeptide	main	5.80273	6.19112	5.54856	6.37066	7.22503	7.66548
10890024	Nfkbia	nuclear factor of kappa light polypeptide gene enhancer in B-cells inhibitor, alpha	0.0041891	0.253	478.48	1111.38	2.32558	up	NM_001105720 // ENSRNOT00000009894 // BC166886	RefSeq // ENSEMBL // GenBank	Rattus norvegicus nuclear factor of kappa light polypeptide gene enhancer in B-cells inhibitor, alpha (Nfkbia), mRNA. // cdna:known chromosome:Rnor_5.0:6:85803991:85807223:-1 gene:ENSRNOG00000007390 gene_biotype:protein_coding transcript_biotype:protein_coding // Rattus norvegicus nuclear factor of kappa light polypeptide gene enhancer in B-cells inhibitor, alpha, mRNA (cDNA clone MGC:188827 IMAG…	chr6	-	75729302	75732474	GO:0000060 // GO:0000060 // GO:0007253 // GO:0007253 // GO:0010745 // GO:0010745 // GO:0010875 // GO:0010875 // GO:0010888 // GO:0010888 // GO:0031663 // GO:0031663 // GO:0032088 // GO:0032088 // GO:0032270 // GO:0032270 // GO:0032495 // GO:0032495 // GO:0032496 // GO:0034142 // GO:0034142 // GO:0042127 // GO:0042127 // GO:0042994 // GO:0043330 // GO:0043330 // GO:0045638 // GO:0045638 // GO:0045…	protein import into nucleus, translocation // protein import into nucleus, translocation // cytoplasmic sequestering of NF-kappaB // cytoplasmic sequestering of NF-kappaB // negative regulation of macrophage derived foam cell differentiation // negative regulation of macrophage derived foam cell differentiation // positive regulation of cholesterol efflux // positive regulation of cholesterol eff…	inferred from electronic annotation // not recorded // inferred from mutant phenotype // not recorded // inferred from electronic annotation // not recorded // inferred from electronic annotation // not recorded // inferred from electronic annotation // not recorded // inferred from electronic annotation // not recorded // inferred from electronic annotation // not recorded // inferred from elect…	GO:0005634 // GO:0005634 // GO:0005737 // GO:0005737 // GO:0005829 // GO:0005829 // GO:0005886 // GO:0005886 // GO:0033256 // GO:0043234 // GO:0005634 // GO:0005737 // GO:0005829 // GO:0005634 // GO:0005634 // GO:0005737 // GO:0005737 // GO:0005829 // GO:0005829 // GO:0005886 // GO:0005886 // GO:0033256 // GO:0043234 // GO:0005829 // GO:0005634 // GO:0005737 // GO:0005634 // GO:0005634 // GO:0005…	nucleus // nucleus // cytoplasm // cytoplasm // cytosol // cytosol // plasma membrane // plasma membrane // I-kappaB/NF-kappaB complex // protein complex // nucleus // cytoplasm // cytosol // nucleus // nucleus // cytoplasm // cytoplasm // cytosol // cytosol // plasma membrane // plasma membrane // I-kappaB/NF-kappaB complex // protein complex // cytosol // nucleus // cytoplasm // nucleus // nucl…	inferred from direct assay // not recorded // inferred from direct assay // not recorded // inferred from direct assay // not recorded // inferred from electronic annotation // not recorded // inferred by curator // inferred from direct assay // inferred from electronic annotation // inferred from electronic annotation // inferred from electronic annotation // inferred from direct assay // not re…	GO:0008139 // GO:0008139 // GO:0019899 // GO:0031072 // GO:0031625 // GO:0031625 // GO:0032403 // GO:0042802 // GO:0042802 // GO:0051059 // GO:0051059 // GO:0051059 // GO:0019899 // GO:0008139 // GO:0008139 // GO:0019899 // GO:0031072 // GO:0031625 // GO:0031625 // GO:0032403 // GO:0042802 // GO:0042802 // GO:0051059 // GO:0051059 // GO:0051059 // GO:0005515 // GO:0019899 // GO:0008139 // GO:0008…	nuclear localization sequence binding // nuclear localization sequence binding // enzyme binding // heat shock protein binding // ubiquitin protein ligase binding // ubiquitin protein ligase binding // protein complex binding // identical protein binding // identical protein binding // NF-kappaB binding // NF-kappaB binding // NF-kappaB binding // enzyme binding // nuclear localization sequence b…	inferred from electronic annotation // not recorded // not recorded // inferred from physical interaction // inferred from electronic annotation // not recorded // inferred from physical interaction // inferred from electronic annotation // not recorded // inferred by curator // inferred from physical interaction // not recorded // inferred from electronic annotation // inferred from electronic a…	GenMAPP // GenMAPP // GenMAPP // GenMAPP // GenMAPP // GenMAPP // GenMAPP // GenMAPP // GenMAPP	Apoptosis // Apoptosis_GenMAPP // Apoptosis_KEGG // Apoptosis // Apoptosis_GenMAPP // Apoptosis_KEGG // Apoptosis // Apoptosis_GenMAPP // Apoptosis_KEGG	Pfam	IPR002110	Ankyrin repeat	main	8.57561	9.58199	8.57689	9.83312	10.3509	10.2233
10909411	Usp2	ubiquitin specific peptidase 2	0.002444	0.205	179.8	422.74	2.32558	up	ENSRNOT00000009975 // NM_053774 // BC085719 // ENSRNOT00000036051	ENSEMBL // RefSeq // GenBank // ENSEMBL	cdna:known chromosome:Rnor_5.0:8:47022640:47046713:1 gene:ENSRNOG00000006663 gene_biotype:protein_coding transcript_biotype:protein_coding // Rattus norvegicus ubiquitin specific peptidase 2 (Usp2), mRNA. // Rattus norvegicus ubiquitin specific peptidase 2, mRNA (cDNA clone MGC:93284 IMAGE:7193298), complete cds. // cdna:known chromosome:Rnor_5.0:8:47037865:47046713:1 gene:ENSRNOG00000006663 gene…	chr8	+	47049678	47076539	GO:0000122 // GO:0000122 // GO:0006511 // GO:0007049 // GO:0007517 // GO:0016579 // GO:0016579 // GO:0016579 // GO:0045931 // GO:0045931 // GO:0048642 // GO:0048643 // GO:0050821 // GO:0050821 // GO:0000122 // GO:0016579 // GO:0050821 // GO:0045931 // GO:0006508 // GO:0000122 // GO:0000122 // GO:0006511 // GO:0007049 // GO:0007517 // GO:0016579 // GO:0016579 // GO:0016579 // GO:0045931 // GO:0045…	negative regulation of transcription from RNA polymerase II promoter // negative regulation of transcription from RNA polymerase II promoter // ubiquitin-dependent protein catabolic process // cell cycle // muscle organ development // protein deubiquitination // protein deubiquitination // protein deubiquitination // positive regulation of mitotic cell cycle // positive regulation of mitotic cell…	not recorded // inferred from sequence or structural similarity // inferred from electronic annotation // inferred from electronic annotation // inferred from electronic annotation // inferred from direct assay // not recorded // inferred from sequence or structural similarity // not recorded // inferred from sequence or structural similarity // inferred from direct assay // inferred from direct …	GO:0005634 // GO:0005634 // GO:0005737 // GO:0005813 // GO:0005938 // GO:0005938 // GO:0048471 // GO:0048471 // GO:0048471 // GO:0005737 // GO:0005634 // GO:0005634 // GO:0005737 // GO:0005813 // GO:0005938 // GO:0005938 // GO:0048471 // GO:0048471 // GO:0048471 // GO:0005737 // GO:0005634 // GO:0005634 // GO:0005737 // GO:0005813 // GO:0005938 // GO:0005938 // GO:0048471 // GO:0048471 // GO:0048…	nucleus // nucleus // cytoplasm // centrosome // cell cortex // cell cortex // perinuclear region of cytoplasm // perinuclear region of cytoplasm // perinuclear region of cytoplasm // cytoplasm // nucleus // nucleus // cytoplasm // centrosome // cell cortex // cell cortex // perinuclear region of cytoplasm // perinuclear region of cytoplasm // perinuclear region of cytoplasm // cytoplasm // nucle…	inferred from direct assay // inferred from electronic annotation // not recorded // inferred from direct assay // inferred from electronic annotation // not recorded // inferred from direct assay // inferred from electronic annotation // not recorded // inferred from electronic annotation // inferred from direct assay // inferred from electronic annotation // not recorded // inferred from direct…	GO:0004221 // GO:0004221 // GO:0004221 // GO:0008234 // GO:0030332 // GO:0030332 // GO:0031625 // GO:0031625 // GO:0042802 // GO:0042802 // GO:0046872 // GO:0005515 // GO:0004221 // GO:0008233 // GO:0016787 // GO:0004221 // GO:0004221 // GO:0004221 // GO:0008234 // GO:0030332 // GO:0030332 // GO:0031625 // GO:0031625 // GO:0042802 // GO:0042802 // GO:0046872 // GO:0004221 // GO:0008233 // GO:0016…	ubiquitin thiolesterase activity // ubiquitin thiolesterase activity // ubiquitin thiolesterase activity // cysteine-type peptidase activity // cyclin binding // cyclin binding // ubiquitin protein ligase binding // ubiquitin protein ligase binding // identical protein binding // identical protein binding // metal ion binding // protein binding // ubiquitin thiolesterase activity // peptidase act…	inferred from mutant phenotype // not recorded // inferred from sequence or structural similarity // inferred from electronic annotation // inferred from electronic annotation // not recorded // inferred from electronic annotation // not recorded // inferred from electronic annotation // not recorded // inferred from electronic annotation // inferred from electronic annotation // inferred from el…	---	---	Pfam // Pfam	IPR001394 // IPR001394	Peptidase C19, ubiquitin carboxyl-terminal hydrolase 2 // Peptidase C19, ubiquitin carboxyl-terminal hydrolase 2	main	7.11051	7.43515	7.95254	9.21563	8.64485	8.36324
10925255	Spp2	secreted phosphoprotein 2	0.0276808	0.428	598.37	1391.89	2.32558	up	NM_053577 // ENSRNOT00000026108 // BC088193	RefSeq // ENSEMBL // GenBank	Rattus norvegicus secreted phosphoprotein 2 (Spp2), mRNA. // cdna:known chromosome:Rnor_5.0:9:95188006:95207530:1 gene:ENSRNOG00000019224 gene_biotype:protein_coding transcript_biotype:protein_coding // Rattus norvegicus secreted phosphoprotein 2, mRNA (cDNA clone MGC:108864 IMAGE:7372900), complete cds.	chr9	+	87297052	87316546	GO:0006461 // GO:0046849 // GO:0006461 // GO:0046849 // GO:0006461 // GO:0046849	protein complex assembly // bone remodeling // protein complex assembly // bone remodeling // protein complex assembly // bone remodeling	inferred from physical interaction // inferred from electronic annotation // inferred from physical interaction // inferred from electronic annotation // inferred from physical interaction // inferred from electronic annotation	GO:0005576 // GO:0043234 // GO:0005576 // GO:0043234 // GO:0005576 // GO:0043234	extracellular region // protein complex // extracellular region // protein complex // extracellular region // protein complex	inferred from electronic annotation // inferred from direct assay // inferred from electronic annotation // inferred from direct assay // inferred from electronic annotation // inferred from direct assay	GO:0004869	cysteine-type endopeptidase inhibitor activity	inferred from electronic annotation	---	---	Pfam // Pfam	IPR000010 // IPR010892	Proteinase inhibitor I25, cystatin // Secreted phosphoprotein 24	main	10.1281	9.36496	8.20919	10.5624	10.2387	10.5803
10825488	Mab21l3	mab-21-like 3 (C. elegans)	0.0140293	0.362	91.88	211.04	2.27273	up	NM_001106456 // ENSRNOT00000021487	RefSeq // ENSEMBL	Rattus norvegicus mab-21-like 3 (C. elegans) (Mab21l3), mRNA. // cdna:known chromosome:Rnor_5.0:2:223666827:223689474:-1 gene:ENSRNOG00000016044 gene_biotype:protein_coding transcript_biotype:protein_coding	chr2	-	196906242	196926045	---	---	---	---	---	---	---	---	---	---	---	Pfam	IPR024810	Mab-21 domain	main	7.15338	6.59834	5.84077	7.2073	7.84737	8.1624
10842239	Mmp9	matrix metallopeptidase 9	0.0057088	0.275	22.33	50.39	2.27273	up	ENSRNOT00000023965 // NM_031055 // U24441	ENSEMBL // RefSeq // GenBank	cdna:known chromosome:Rnor_5.0:3:167597817:167605882:1 gene:ENSRNOG00000017539 gene_biotype:protein_coding transcript_biotype:protein_coding // Rattus norvegicus matrix metallopeptidase 9 (Mmp9), mRNA. // Rattus norvegicus gelatinase B (GelB) mRNA, complete cds.	chr3	+	155985473	155993435	GO:0001501 // GO:0001501 // GO:0001503 // GO:0001666 // GO:0002687 // GO:0006508 // GO:0006508 // GO:0006508 // GO:0006508 // GO:0006508 // GO:0006979 // GO:0007566 // GO:0007566 // GO:0007568 // GO:0007584 // GO:0009314 // GO:0009408 // GO:0009612 // GO:0010033 // GO:0014070 // GO:0016049 // GO:0019087 // GO:0030198 // GO:0030198 // GO:0030574 // GO:0030574 // GO:0030574 // GO:0031915 // GO:0032…	skeletal system development // skeletal system development // ossification // response to hypoxia // positive regulation of leukocyte migration // proteolysis // proteolysis // proteolysis // proteolysis // proteolysis // response to oxidative stress // embryo implantation // embryo implantation // aging // response to nutrient // response to radiation // response to heat // response to mechanica…	inferred from electronic annotation // not recorded // inferred from expression pattern // inferred from expression pattern // inferred from direct assay // inferred from direct assay // inferred from electronic annotation // inferred from expression pattern // not recorded // inferred from sequence or structural similarity // inferred from direct assay // inferred from electronic annotation // n…	GO:0005578 // GO:0005615 // GO:0005615 // GO:0005615 // GO:0005615 // GO:0031012 // GO:0043234 // GO:0005576 // GO:0005578 // GO:0005615 // GO:0005615 // GO:0005615 // GO:0005615 // GO:0031012 // GO:0043234 // GO:0005576 // GO:0005578 // GO:0005615 // GO:0005615 // GO:0005615 // GO:0005615 // GO:0031012 // GO:0043234 // GO:0005576	proteinaceous extracellular matrix // extracellular space // extracellular space // extracellular space // extracellular space // extracellular matrix // protein complex // extracellular region // proteinaceous extracellular matrix // extracellular space // extracellular space // extracellular space // extracellular space // extracellular matrix // protein complex // extracellular region // prote…	inferred from electronic annotation // inferred from direct assay // inferred from electronic annotation // not recorded // inferred from sequence or structural similarity // inferred from electronic annotation // inferred from direct assay // inferred from electronic annotation // inferred from electronic annotation // inferred from direct assay // inferred from electronic annotation // not reco…	GO:0001968 // GO:0004222 // GO:0004222 // GO:0004222 // GO:0004222 // GO:0005515 // GO:0008233 // GO:0008233 // GO:0008237 // GO:0008237 // GO:0008270 // GO:0032403 // GO:0005515 // GO:0008237 // GO:0008233 // GO:0016787 // GO:0046872 // GO:0001968 // GO:0004222 // GO:0004222 // GO:0004222 // GO:0004222 // GO:0005515 // GO:0008233 // GO:0008233 // GO:0008237 // GO:0008237 // GO:0008270 // GO:0032…	fibronectin binding // metalloendopeptidase activity // metalloendopeptidase activity // metalloendopeptidase activity // metalloendopeptidase activity // protein binding // peptidase activity // peptidase activity // metallopeptidase activity // metallopeptidase activity // zinc ion binding // protein complex binding // protein binding // metallopeptidase activity // peptidase activity // hydrol…	inferred from physical interaction // inferred from electronic annotation // not recorded // inferred from sequence or structural similarity // traceable author statement // inferred from physical interaction // inferred from direct assay // not recorded // inferred from direct assay // traceable author statement // inferred from electronic annotation // inferred from direct assay // inferred fro…	GenMAPP // GenMAPP // GenMAPP	Matrix_Metalloproteinases // Matrix_Metalloproteinases // Matrix_Metalloproteinases	Pfam // Pfam // Pfam // Pfam // Pfam	IPR000562 // IPR001818 // IPR002477 // IPR006970 // IPR018487	Fibronectin, type II, collagen-binding // Peptidase M10, metallopeptidase // Peptidoglycan binding-like // PT repeat // Hemopexin-like repeats	main	4.35692	4.43121	4.68234	4.96423	6.21777	5.83637
10860852	Tfpi2	tissue factor pathway inhibitor 2	0.0188305	0.393	17.29	39.05	2.27273	up	ENSRNOT00000013989 // NM_173141	ENSEMBL // RefSeq	cdna:known chromosome:Rnor_5.0:4:28855875:28860297:-1 gene:ENSRNOG00000010513 gene_biotype:protein_coding transcript_biotype:protein_coding // Rattus norvegicus tissue factor pathway inhibitor 2 (Tfpi2), mRNA.	chr4	-	28807080	28811502	GO:0007596 // GO:0010466 // GO:0007596 // GO:0010466	blood coagulation // negative regulation of peptidase activity // blood coagulation // negative regulation of peptidase activity	inferred from electronic annotation // inferred from electronic annotation // inferred from electronic annotation // inferred from electronic annotation	GO:0005576 // GO:0005576	extracellular region // extracellular region	inferred from electronic annotation // inferred from electronic annotation	GO:0004867 // GO:0030414 // GO:0004867 // GO:0030414	serine-type endopeptidase inhibitor activity // peptidase inhibitor activity // serine-type endopeptidase inhibitor activity // peptidase inhibitor activity	inferred from electronic annotation // inferred from electronic annotation // inferred from electronic annotation // inferred from electronic annotation	---	---	Pfam	IPR002223	Proteinase inhibitor I2, Kunitz metazoa	main	4.16746	4.08421	4.11087	4.70587	6.29004	4.91874
10880293	Map3k6	mitogen-activated protein kinase kinase kinase 6	0.0003128	0.133	37.81	86.67	2.27273	up	NM_001107909 // ENSRNOT00000012463	RefSeq // ENSEMBL	Rattus norvegicus mitogen-activated protein kinase kinase kinase 6 (Map3k6), mRNA. // cdna:known chromosome:Rnor_5.0:5:155101637:155113501:1 gene:ENSRNOG00000008936 gene_biotype:protein_coding transcript_biotype:protein_coding	chr5	-	151873621	151898445	GO:0000186 // GO:0006468 // GO:0000165 // GO:0000186 // GO:0006468 // GO:0016310 // GO:0000186 // GO:0006468 // GO:0000186 // GO:0006468 // GO:0000165 // GO:0016310	activation of MAPKK activity // protein phosphorylation // MAPK cascade // activation of MAPKK activity // protein phosphorylation // phosphorylation // activation of MAPKK activity // protein phosphorylation // activation of MAPKK activity // protein phosphorylation // MAPK cascade // phosphorylation	not recorded // not recorded // inferred from electronic annotation // inferred from electronic annotation // inferred from electronic annotation // inferred from electronic annotation // not recorded // not recorded // inferred from electronic annotation // inferred from electronic annotation // inferred from electronic annotation // inferred from electronic annotation	---	---	---	GO:0000287 // GO:0000287 // GO:0004709 // GO:0004709 // GO:0005524 // GO:0005524 // GO:0000166 // GO:0004672 // GO:0004674 // GO:0016301 // GO:0016740 // GO:0016772 // GO:0000287 // GO:0000287 // GO:0004709 // GO:0004709 // GO:0005524 // GO:0005524 // GO:0005515 // GO:0004672 // GO:0004713 // GO:0016772 // GO:0000166 // GO:0004674 // GO:0016301 // GO:0016740	magnesium ion binding // magnesium ion binding // MAP kinase kinase kinase activity // MAP kinase kinase kinase activity // ATP binding // ATP binding // nucleotide binding // protein kinase activity // protein serine/threonine kinase activity // kinase activity // transferase activity // transferase activity, transferring phosphorus-containing groups // magnesium ion binding // magnesium ion bin…	inferred from electronic annotation // not recorded // inferred from electronic annotation // not recorded // inferred from electronic annotation // not recorded // inferred from electronic annotation // inferred from electronic annotation // inferred from electronic annotation // inferred from electronic annotation // inferred from electronic annotation // inferred from electronic annotation // …	---	---	Pfam // Pfam	IPR000719 // IPR001245	Protein kinase, catalytic domain // Serine-threonine/tyrosine-protein kinase catalytic domain	main	4.96141	5.27664	5.51202	6.33999	6.76006	6.2654
10894778	Slc5a8	solute carrier family 5 (iodide transporter), member 8	0.0004874	0.149	414.08	950.96	2.27273	up	NM_001191987 // ENSRNOT00000008613	RefSeq // ENSEMBL	Rattus norvegicus solute carrier family 5 (iodide transporter), member 8 (Slc5a8), mRNA. // cdna:known chromosome:Rnor_5.0:7:29537674:29578495:1 gene:ENSRNOG00000006367 gene_biotype:protein_coding transcript_biotype:protein_coding	chr7	+	25582502	25626427	GO:0055085 // GO:0006810 // GO:0055085 // GO:0006810	transmembrane transport // transport // transmembrane transport // transport	inferred from electronic annotation // inferred from electronic annotation // inferred from electronic annotation // inferred from electronic annotation	GO:0016021 // GO:0016020 // GO:0016021 // GO:0016020	integral to membrane // membrane // integral to membrane // membrane	inferred from electronic annotation // inferred from electronic annotation // inferred from electronic annotation // inferred from electronic annotation	GO:0005215 // GO:0005215	transporter activity // transporter activity	inferred from electronic annotation // inferred from electronic annotation	---	---	Pfam	IPR001734	Sodium/solute symporter	main	8.6069	8.47412	9.02786	9.55023	10.1183	10.064
10896814	Myc	myelocytomatosis oncogene	0.0018991	0.199	29.63	67.39	2.27273	up	NM_012603 // ENSRNOT00000006188 // AY679730	RefSeq // ENSEMBL // GenBank	Rattus norvegicus myelocytomatosis oncogene (Myc), mRNA. // cdna:known chromosome:Rnor_5.0:7:103157452:103162376:1 gene:ENSRNOG00000004500 gene_biotype:protein_coding transcript_biotype:protein_coding // Rattus norvegicus strain BN/SsNHsd c-myc mRNA, complete cds.	chr7	+	98953142	98958060	GO:0000122 // GO:0000122 // GO:0000122 // GO:0000165 // GO:0000165 // GO:0001658 // GO:0001658 // GO:0001658 // GO:0001783 // GO:0001783 // GO:0001836 // GO:0002053 // GO:0002053 // GO:0002082 // GO:0002904 // GO:0002904 // GO:0006006 // GO:0006309 // GO:0006338 // GO:0006338 // GO:0006351 // GO:0006352 // GO:0006355 // GO:0006355 // GO:0006355 // GO:0006355 // GO:0006366 // GO:0006848 // GO:0006…	negative regulation of transcription from RNA polymerase II promoter // negative regulation of transcription from RNA polymerase II promoter // negative regulation of transcription from RNA polymerase II promoter // MAPK cascade // MAPK cascade // branching involved in ureteric bud morphogenesis // branching involved in ureteric bud morphogenesis // branching involved in ureteric bud morphogenesi…	inferred from electronic annotation // inferred from mutant phenotype // not recorded // not recorded // inferred from sequence or structural similarity // inferred from electronic annotation // not recorded // inferred from sequence or structural similarity // inferred from electronic annotation // not recorded // inferred from electronic annotation // not recorded // inferred from sequence or s…	GO:0005634 // GO:0005634 // GO:0005634 // GO:0005654 // GO:0005654 // GO:0005730 // GO:0005730 // GO:0005730 // GO:0005737 // GO:0005819 // GO:0005819 // GO:0016604 // GO:0016604 // GO:0030424 // GO:0030424 // GO:0043234 // GO:0005634 // GO:0005654 // GO:0005730 // GO:0005634 // GO:0005634 // GO:0005634 // GO:0005654 // GO:0005654 // GO:0005730 // GO:0005730 // GO:0005730 // GO:0005737 // GO:0005…	nucleus // nucleus // nucleus // nucleoplasm // nucleoplasm // nucleolus // nucleolus // nucleolus // cytoplasm // spindle // spindle // nuclear body // nuclear body // axon // axon // protein complex // nucleus // nucleoplasm // nucleolus // nucleus // nucleus // nucleus // nucleoplasm // nucleoplasm // nucleolus // nucleolus // nucleolus // cytoplasm // spindle // spindle // nuclear body // nuc…	inferred from direct assay // not recorded // traceable author statement // not recorded // inferred from sequence or structural similarity // inferred from direct assay // not recorded // inferred from sequence or structural similarity // inferred from direct assay // inferred from electronic annotation // not recorded // inferred from electronic annotation // not recorded // inferred from elect…	GO:0000987 // GO:0000987 // GO:0003677 // GO:0003677 // GO:0003690 // GO:0003700 // GO:0003700 // GO:0003700 // GO:0003700 // GO:0008134 // GO:0032403 // GO:0032403 // GO:0043565 // GO:0046982 // GO:0046983 // GO:0070491 // GO:0070888 // GO:0070888 // GO:0003677 // GO:0000987 // GO:0000987 // GO:0003677 // GO:0003677 // GO:0003690 // GO:0003700 // GO:0003700 // GO:0003700 // GO:0003700 // GO:0008…	core promoter proximal region sequence-specific DNA binding // core promoter proximal region sequence-specific DNA binding // DNA binding // DNA binding // double-stranded DNA binding // sequence-specific DNA binding transcription factor activity // sequence-specific DNA binding transcription factor activity // sequence-specific DNA binding transcription factor activity // sequence-specific DNA b…	inferred from electronic annotation // not recorded // inferred from direct assay // not recorded // inferred from direct assay // inferred from direct assay // inferred from electronic annotation // inferred from mutant phenotype // not recorded // not recorded // not recorded // inferred from sequence or structural similarity // inferred from direct assay // inferred from physical interaction /…	GenMAPP // GenMAPP // GenMAPP // GenMAPP // GenMAPP // GenMAPP // GenMAPP // GenMAPP // GenMAPP // GenMAPP // GenMAPP // GenMAPP	Apoptosis_GenMAPP // Apoptosis // G1_to_S_cell_cycle_Reactome // Wnt_Signaling // Apoptosis_GenMAPP // Apoptosis // G1_to_S_cell_cycle_Reactome // Wnt_Signaling // Apoptosis_GenMAPP // Apoptosis // G1_to_S_cell_cycle_Reactome // Wnt_Signaling	Pfam // Pfam // Pfam	IPR003327 // IPR011598 // IPR012682	Leucine zipper, Myc // Myc-type, basic helix-loop-helix (bHLH) domain // Transcription regulator Myc, N-terminal	main	4.39712	5.07913	5.21892	5.8252	6.4452	6.00584
10897643	Maff	v-maf musculoaponeurotic fibrosarcoma oncogene homolog F (avian)	0.0018785	0.199	23.18	52.39	2.27273	up	NM_001130573 // ENSRNOT00000017181	RefSeq // ENSEMBL	Rattus norvegicus v-maf musculoaponeurotic fibrosarcoma oncogene homolog F (avian) (Maff), mRNA. // cdna:known chromosome:Rnor_5.0:7:120573573:120584925:1 gene:ENSRNOG00000012886 gene_biotype:protein_coding transcript_biotype:protein_coding	chr7	+	117327470	117339070	GO:0001701 // GO:0001701 // GO:0035914 // GO:0045604 // GO:0045604 // GO:0006355 // GO:0035914 // GO:0001701 // GO:0001701 // GO:0035914 // GO:0045604 // GO:0045604 // GO:0006355 // GO:0035914	in utero embryonic development // in utero embryonic development // skeletal muscle cell differentiation // regulation of epidermal cell differentiation // regulation of epidermal cell differentiation // regulation of transcription, DNA-dependent // skeletal muscle cell differentiation // in utero embryonic development // in utero embryonic development // skeletal muscle cell differentiation // r…	inferred from electronic annotation // not recorded // not recorded // inferred from electronic annotation // not recorded // inferred from electronic annotation // inferred from electronic annotation // inferred from electronic annotation // not recorded // not recorded // inferred from electronic annotation // not recorded // inferred from electronic annotation // inferred from electronic annot…	GO:0005634 // GO:0005634	nucleus // nucleus	inferred from electronic annotation // inferred from electronic annotation	GO:0003700 // GO:0043565 // GO:0003677 // GO:0003700 // GO:0043565 // GO:0003677	sequence-specific DNA binding transcription factor activity // sequence-specific DNA binding // DNA binding // sequence-specific DNA binding transcription factor activity // sequence-specific DNA binding // DNA binding	inferred from electronic annotation // inferred from electronic annotation // inferred from electronic annotation // inferred from electronic annotation // inferred from electronic annotation // inferred from electronic annotation	---	---	Pfam	IPR004826	Basic leucine zipper domain, Maf-type	main	4.01675	4.77342	4.84184	5.39335	5.85821	5.93461
10910431	Stra6	stimulated by retinoic acid 6	0.0114411	0.343	93.02	212.67	2.27273	up	NM_001029924 // ENSRNOT00000011074 // BC097373	RefSeq // ENSEMBL // GenBank	Rattus norvegicus stimulated by retinoic acid 6 (Stra6), mRNA. // cdna:known chromosome:Rnor_5.0:8:62701447:62720527:1 gene:ENSRNOG00000008312 gene_biotype:protein_coding transcript_biotype:protein_coding // Rattus norvegicus stimulated by retinoic acid gene 6, mRNA (cDNA clone MGC:114408 IMAGE:7444462), complete cds.	chr8	+	61920765	61939793	GO:0001568 // GO:0001822 // GO:0001822 // GO:0003184 // GO:0003184 // GO:0003281 // GO:0003281 // GO:0007507 // GO:0007612 // GO:0007631 // GO:0007631 // GO:0030324 // GO:0030325 // GO:0030325 // GO:0030540 // GO:0030540 // GO:0042297 // GO:0042297 // GO:0042573 // GO:0043583 // GO:0043583 // GO:0043585 // GO:0043585 // GO:0048286 // GO:0048520 // GO:0048520 // GO:0048546 // GO:0048546 // GO:0048…	blood vessel development // kidney development // kidney development // pulmonary valve morphogenesis // pulmonary valve morphogenesis // ventricular septum development // ventricular septum development // heart development // learning // feeding behavior // feeding behavior // lung development // adrenal gland development // adrenal gland development // female genitalia development // female gen…	not recorded // inferred from electronic annotation // not recorded // inferred from electronic annotation // not recorded // inferred from electronic annotation // not recorded // not recorded // not recorded // inferred from electronic annotation // not recorded // not recorded // inferred from electronic annotation // not recorded // inferred from electronic annotation // not recorded // infer…	GO:0005886 // GO:0016021 // GO:0043234 // GO:0043234 // GO:0016020 // GO:0016021 // GO:0005886 // GO:0016021 // GO:0043234 // GO:0043234 // GO:0016020 // GO:0016021 // GO:0005886 // GO:0016021 // GO:0043234 // GO:0043234 // GO:0016020 // GO:0016021	plasma membrane // integral to membrane // protein complex // protein complex // membrane // integral to membrane // plasma membrane // integral to membrane // protein complex // protein complex // membrane // integral to membrane // plasma membrane // integral to membrane // protein complex // protein complex // membrane // integral to membrane	inferred from electronic annotation // inferred by curator // inferred from electronic annotation // not recorded // inferred from electronic annotation // inferred from electronic annotation // inferred from electronic annotation // inferred by curator // inferred from electronic annotation // not recorded // inferred from electronic annotation // inferred from electronic annotation // inferred …	GO:0004872 // GO:0051183 // GO:0004872 // GO:0051183 // GO:0004872 // GO:0051183 // GO:0004872 // GO:0051183 // GO:0004872 // GO:0051183 // GO:0004872 // GO:0051183	receptor activity // vitamin transporter activity // receptor activity // vitamin transporter activity // receptor activity // vitamin transporter activity // receptor activity // vitamin transporter activity // receptor activity // vitamin transporter activity // receptor activity // vitamin transporter activity	inferred by curator // inferred by curator // inferred from electronic annotation // inferred from electronic annotation // inferred by curator // inferred by curator // inferred from electronic annotation // inferred from electronic annotation // inferred by curator // inferred by curator // inferred from electronic annotation // inferred from electronic annotation	---	---	---	---	---	main	7.29459	6.58815	5.76313	7.64209	7.81722	7.79104
10920820	Acaa1b	acetyl-Coenzyme A acyltransferase 1B	0.0001995	0.129	215.11	490.51	2.27273	up	NM_001040019 // NM_012489 // ENSRNOT00000045049 // J02749 // M32801 // ENSRNOT00000055919	RefSeq // RefSeq // ENSEMBL // GenBank // GenBank // ENSEMBL	Rattus norvegicus acetyl-Coenzyme A acyltransferase 1B (Acaa1b), mRNA. // Rattus norvegicus acetyl-Coenzyme A acyltransferase 1A (Acaa1a), nuclear gene encoding mitochondrial protein, mRNA. // cdna:known chromosome:Rnor_5.0:8:127234654:127242997:1 gene:ENSRNOG00000032908 gene_biotype:protein_coding transcript_biotype:protein_coding // Rat peroxisomal 3-ketoacyl-CoA thiolase mRNA, complete cds. //…	chr8	-	124110412	124118925	GO:0006631 // GO:0006629 // GO:0008152 // GO:0000038 // GO:0006635 // GO:0006635 // GO:0007584 // GO:0008206 // GO:0042493 // GO:0048545 // GO:0006629 // GO:0006631 // GO:0008152 // GO:0000038 // GO:0006635 // GO:0006635 // GO:0007584 // GO:0008206 // GO:0042493 // GO:0048545 // GO:0006631 // GO:0000038 // GO:0008152 // GO:0006635 // GO:0008206 // GO:0006629 // GO:0006631 // GO:0006629 // GO:0008…	fatty acid metabolic process // lipid metabolic process // metabolic process // very long-chain fatty acid metabolic process // fatty acid beta-oxidation // fatty acid beta-oxidation // response to nutrient // bile acid metabolic process // response to drug // response to steroid hormone stimulus // lipid metabolic process // fatty acid metabolic process // metabolic process // very long-chain fa…	inferred from electronic annotation // inferred from electronic annotation // inferred from electronic annotation // not recorded // inferred from genetic interaction // not recorded // inferred from direct assay // not recorded // inferred from expression pattern // inferred from direct assay // inferred from electronic annotation // inferred from electronic annotation // inferred from electroni…	GO:0005777 // GO:0005777 // GO:0005739 // GO:0005777 // GO:0005777 // GO:0043231 // GO:0005777 // GO:0005739 // GO:0005777 // GO:0005777 // GO:0043231 // GO:0005777 // GO:0043231 // GO:0005777 // GO:0005777 // GO:0005739 // GO:0005777 // GO:0005777 // GO:0043231 // GO:0005777 // GO:0005739 // GO:0005777 // GO:0005777 // GO:0043231 // GO:0005777	peroxisome // peroxisome // mitochondrion // peroxisome // peroxisome // intracellular membrane-bounded organelle // peroxisome // mitochondrion // peroxisome // peroxisome // intracellular membrane-bounded organelle // peroxisome // intracellular membrane-bounded organelle // peroxisome // peroxisome // mitochondrion // peroxisome // peroxisome // intracellular membrane-bounded organelle // pero…	inferred from direct assay // inferred from electronic annotation // not recorded // inferred from direct assay // not recorded // not recorded // inferred from electronic annotation // not recorded // inferred from direct assay // not recorded // not recorded // inferred from electronic annotation // inferred from electronic annotation // inferred from direct assay // inferred from electronic an…	GO:0003988 // GO:0005515 // GO:0016747 // GO:0003824 // GO:0016740 // GO:0016746 // GO:0003988 // GO:0016401 // GO:0016401 // GO:0003824 // GO:0016740 // GO:0016746 // GO:0016747 // GO:0003988 // GO:0016401 // GO:0016401 // GO:0005515 // GO:0016747 // GO:0005515 // GO:0003824 // GO:0016401 // GO:0016740 // GO:0016746 // GO:0003988 // GO:0005515 // GO:0016747 // GO:0003824 // GO:0016740 // GO:0016…	acetyl-CoA C-acyltransferase activity // protein binding // transferase activity, transferring acyl groups other than amino-acyl groups // catalytic activity // transferase activity // transferase activity, transferring acyl groups // acetyl-CoA C-acyltransferase activity // palmitoyl-CoA oxidase activity // palmitoyl-CoA oxidase activity // catalytic activity // transferase activity // transfera…	inferred from electronic annotation // inferred from physical interaction // inferred from electronic annotation // inferred from electronic annotation // inferred from electronic annotation // inferred from electronic annotation // inferred from electronic annotation // inferred from genetic interaction // not recorded // inferred from electronic annotation // inferred from electronic annotation…	---	---	Pfam // Pfam // Pfam // Pfam	IPR020616 // IPR020617 // IPR020616 // IPR020617	Thiolase, N-terminal // Thiolase, C-terminal // Thiolase, N-terminal // Thiolase, C-terminal	main	8.11133	7.63134	7.5317	9.09925	8.84346	8.92457
10720215	Zfp36	zinc finger protein 36	0.01153	0.343	439.98	975.36	2.22222	up	NM_133290 // ENSRNOT00000026661 // BC060308	RefSeq // ENSEMBL // GenBank	Rattus norvegicus zinc finger protein 36 (Zfp36), mRNA. // cdna:known chromosome:Rnor_5.0:1:86595418:86597898:1 gene:ENSRNOG00000019673 gene_biotype:protein_coding transcript_biotype:protein_coding // Rattus norvegicus zinc finger protein 36, mRNA (cDNA clone MGC:72649 IMAGE:6922188), complete cds.	chr1	-	83486647	83489123	GO:0000122 // GO:0000122 // GO:0000288 // GO:0000289 // GO:0000289 // GO:0006357 // GO:0006402 // GO:0006402 // GO:0006950 // GO:0006950 // GO:0007243 // GO:0007243 // GO:0032680 // GO:0032680 // GO:0035278 // GO:0043488 // GO:0043488 // GO:0045638 // GO:0045638 // GO:0045893 // GO:0050728 // GO:0050728 // GO:0050779 // GO:0050779 // GO:0060213 // GO:0060213 // GO:0070935 // GO:0070935 // GO:1900…	negative regulation of transcription from RNA polymerase II promoter // negative regulation of transcription from RNA polymerase II promoter // nuclear-transcribed mRNA catabolic process, deadenylation-dependent decay // nuclear-transcribed mRNA poly(A) tail shortening // nuclear-transcribed mRNA poly(A) tail shortening // regulation of transcription from RNA polymerase II promoter // mRNA catabo…	inferred from electronic annotation // not recorded // not recorded // inferred from electronic annotation // not recorded // not recorded // not recorded // inferred from sequence or structural similarity // not recorded // inferred from sequence or structural similarity // inferred from electronic annotation // not recorded // not recorded // inferred from sequence or structural similarity // i…	GO:0005634 // GO:0005634 // GO:0005634 // GO:0005737 // GO:0005737 // GO:0005737 // GO:0005829 // GO:0005829 // GO:0010494 // GO:0010494 // GO:0005634 // GO:0005737 // GO:0010494 // GO:0005634 // GO:0005634 // GO:0005634 // GO:0005737 // GO:0005737 // GO:0005737 // GO:0005829 // GO:0005829 // GO:0010494 // GO:0010494 // GO:0005634 // GO:0005737 // GO:0010494 // GO:0005634 // GO:0005634 // GO:0005…	nucleus // nucleus // nucleus // cytoplasm // cytoplasm // cytoplasm // cytosol // cytosol // cytoplasmic stress granule // cytoplasmic stress granule // nucleus // cytoplasm // cytoplasmic stress granule // nucleus // nucleus // nucleus // cytoplasm // cytoplasm // cytoplasm // cytosol // cytosol // cytoplasmic stress granule // cytoplasmic stress granule // nucleus // cytoplasm // cytoplasmic s…	inferred from direct assay // not recorded // inferred from sequence or structural similarity // inferred from direct assay // not recorded // inferred from sequence or structural similarity // inferred from electronic annotation // not recorded // not recorded // inferred from sequence or structural similarity // inferred from electronic annotation // inferred from electronic annotation // infer…	GO:0003677 // GO:0003729 // GO:0008270 // GO:0017091 // GO:0017091 // GO:0019901 // GO:0019957 // GO:0035925 // GO:0035925 // GO:0071889 // GO:0071889 // GO:0003729 // GO:0017091 // GO:0019901 // GO:0019957 // GO:0046872 // GO:0071889 // GO:0003677 // GO:0003729 // GO:0008270 // GO:0017091 // GO:0017091 // GO:0019901 // GO:0019957 // GO:0035925 // GO:0035925 // GO:0071889 // GO:0071889 // GO:0003…	DNA binding // mRNA binding // zinc ion binding // AU-rich element binding // AU-rich element binding // protein kinase binding // C-C chemokine binding // mRNA 3'-UTR AU-rich region binding // mRNA 3'-UTR AU-rich region binding // 14-3-3 protein binding // 14-3-3 protein binding // mRNA binding // AU-rich element binding // protein kinase binding // C-C chemokine binding // metal ion binding // …	inferred from electronic annotation // not recorded // inferred from electronic annotation // not recorded // inferred from sequence or structural similarity // not recorded // not recorded // inferred from electronic annotation // not recorded // not recorded // inferred from sequence or structural similarity // inferred from electronic annotation // inferred from electronic annotation // inferr…	---	---	Pfam	IPR000571	Zinc finger, CCCH-type	main	8.37754	9.63086	8.36304	9.75695	9.92314	10.1621
10761978	P2rx4	purinergic receptor P2X, ligand-gated ion channel 4	0.002036	0.199	112.08	248.02	2.22222	up	ENSRNOT00000001752 // NM_031594 // BC078792	ENSEMBL // RefSeq // GenBank	cdna:known chromosome:Rnor_5.0:12:41196780:41214369:-1 gene:ENSRNOG00000001300 gene_biotype:protein_coding transcript_biotype:protein_coding // Rattus norvegicus purinergic receptor P2X, ligand-gated ion channel 4 (P2rx4), mRNA. // Rattus norvegicus purinergic receptor P2X, ligand-gated ion channel 4, mRNA (cDNA clone MGC:93356 IMAGE:7123247), complete cds.	chr12	-	34943900	34961551	GO:0002028 // GO:0006809 // GO:0006809 // GO:0006810 // GO:0006816 // GO:0006816 // GO:0007165 // GO:0008217 // GO:0010524 // GO:0010614 // GO:0019228 // GO:0019233 // GO:0033198 // GO:0034220 // GO:0034405 // GO:0035590 // GO:0035590 // GO:0042311 // GO:0042311 // GO:0042981 // GO:0050850 // GO:0051260 // GO:0051899 // GO:0055117 // GO:0055119 // GO:0060079 // GO:0060079 // GO:0006811 // GO:0008…	regulation of sodium ion transport // nitric oxide biosynthetic process // nitric oxide biosynthetic process // transport // calcium ion transport // calcium ion transport // signal transduction // regulation of blood pressure // positive regulation of calcium ion transport into cytosol // negative regulation of cardiac muscle hypertrophy // regulation of action potential in neuron // sensory per…	inferred from direct assay // inferred from electronic annotation // not recorded // not recorded // inferred from electronic annotation // not recorded // not recorded // not recorded // not recorded // not recorded // inferred from direct assay // inferred from mutant phenotype // not recorded // not recorded // not recorded // inferred from direct assay // not recorded // inferred from electro…	GO:0005886 // GO:0014069 // GO:0016020 // GO:0016021 // GO:0030054 // GO:0030424 // GO:0030425 // GO:0043025 // GO:0043195 // GO:0043197 // GO:0045177 // GO:0045177 // GO:0045202 // GO:0048471 // GO:0016020 // GO:0030054 // GO:0048471 // GO:0005886 // GO:0014069 // GO:0016020 // GO:0016021 // GO:0030054 // GO:0030424 // GO:0030425 // GO:0043025 // GO:0043195 // GO:0043197 // GO:0045177 // GO:0045…	plasma membrane // postsynaptic density // membrane // integral to membrane // cell junction // axon // dendrite // neuronal cell body // terminal bouton // dendritic spine // apical part of cell // apical part of cell // synapse // perinuclear region of cytoplasm // membrane // cell junction // perinuclear region of cytoplasm // plasma membrane // postsynaptic density // membrane // integral to …	inferred from direct assay // inferred from direct assay // not recorded // inferred from electronic annotation // not recorded // inferred from direct assay // inferred from direct assay // inferred from direct assay // inferred from direct assay // inferred from direct assay // inferred from electronic annotation // not recorded // inferred from direct assay // not recorded // inferred from ele…	GO:0001614 // GO:0001614 // GO:0004931 // GO:0004931 // GO:0005102 // GO:0005507 // GO:0005524 // GO:0005524 // GO:0008144 // GO:0008270 // GO:0045296 // GO:0004872 // GO:0004931 // GO:0005216 // GO:0005524 // GO:0045296 // GO:0001614 // GO:0001614 // GO:0001614 // GO:0004931 // GO:0004931 // GO:0005102 // GO:0005507 // GO:0005524 // GO:0005524 // GO:0008144 // GO:0008270 // GO:0045296 // GO:0001…	purinergic nucleotide receptor activity // purinergic nucleotide receptor activity // extracellular ATP-gated cation channel activity // extracellular ATP-gated cation channel activity // receptor binding // copper ion binding // ATP binding // ATP binding // drug binding // zinc ion binding // cadherin binding // receptor activity // extracellular ATP-gated cation channel activity // ion channel…	inferred from direct assay // not recorded // inferred from direct assay // not recorded // inferred from physical interaction // inferred from direct assay // inferred by curator // inferred from direct assay // inferred from direct assay // inferred from direct assay // not recorded // inferred from electronic annotation // inferred from electronic annotation // inferred from electronic annotat…	---	---	Pfam	IPR001429	P2X purinoreceptor	main	7.1057	6.80873	6.53814	8.43834	7.55644	7.921
10795602	Map3k8	mitogen-activated protein kinase kinase kinase 8	0.0043445	0.254	82.23	183.99	2.22222	up	ENSRNOT00000022190 // NM_053847 // M94454	ENSEMBL // RefSeq // GenBank	cdna:known chromosome:Rnor_5.0:17:54146364:54166886:1 gene:ENSRNOG00000016378 gene_biotype:protein_coding transcript_biotype:protein_coding // Rattus norvegicus mitogen-activated protein kinase kinase kinase 8 (Map3k8), mRNA. // Rattus norvegicus serine/threonine protein kinase (Tpl-2) mRNA, exons 1-7 and complete cds.	chr17	+	61910179	61930459	GO:0007049 // GO:0006468 // GO:0000165 // GO:0000186 // GO:0007165 // GO:0016310 // GO:0007049 // GO:0000165 // GO:0000186 // GO:0006468 // GO:0007165 // GO:0016310 // GO:0007049 // GO:0000165 // GO:0000186 // GO:0006468 // GO:0007165 // GO:0016310	cell cycle // protein phosphorylation // MAPK cascade // activation of MAPKK activity // signal transduction // phosphorylation // cell cycle // MAPK cascade // activation of MAPKK activity // protein phosphorylation // signal transduction // phosphorylation // cell cycle // MAPK cascade // activation of MAPKK activity // protein phosphorylation // signal transduction // phosphorylation	inferred from electronic annotation // inferred from electronic annotation // inferred from electronic annotation // inferred from electronic annotation // inferred from electronic annotation // inferred from electronic annotation // inferred from electronic annotation // inferred from electronic annotation // inferred from electronic annotation // inferred from electronic annotation // inferred …	GO:0005737 // GO:0005737 // GO:0005829 // GO:0005737 // GO:0005737 // GO:0005829 // GO:0005737 // GO:0005737 // GO:0005829	cytoplasm // cytoplasm // cytosol // cytoplasm // cytoplasm // cytosol // cytoplasm // cytoplasm // cytosol	inferred from electronic annotation // not recorded // traceable author statement // inferred from electronic annotation // not recorded // traceable author statement // inferred from electronic annotation // not recorded // traceable author statement	GO:0000287 // GO:0004709 // GO:0005524 // GO:0005515 // GO:0004672 // GO:0004713 // GO:0016772 // GO:0004674 // GO:0016301 // GO:0000166 // GO:0016740 // GO:0046872 // GO:0000287 // GO:0004709 // GO:0005524 // GO:0000166 // GO:0004672 // GO:0004674 // GO:0016301 // GO:0016740 // GO:0016772 // GO:0046872 // GO:0000287 // GO:0004709 // GO:0005524 // GO:0000166 // GO:0004672 // GO:0004674 // GO:0016…	magnesium ion binding // MAP kinase kinase kinase activity // ATP binding // protein binding // protein kinase activity // protein tyrosine kinase activity // transferase activity, transferring phosphorus-containing groups // protein serine/threonine kinase activity // kinase activity // nucleotide binding // transferase activity // metal ion binding // magnesium ion binding // MAP kinase kinase …	inferred from electronic annotation // inferred from electronic annotation // inferred from electronic annotation // inferred from electronic annotation // inferred from electronic annotation // inferred from electronic annotation // inferred from electronic annotation // inferred from electronic annotation // inferred from electronic annotation // inferred from electronic annotation // inferred …	---	---	Pfam // Pfam	IPR000719 // IPR001245	Protein kinase, catalytic domain // Serine-threonine/tyrosine-protein kinase catalytic domain	main	6.25555	6.58865	6.26789	6.94963	8.11111	7.56253
10826249	Vcam1	vascular cell adhesion molecule 1	0.0208998	0.398	158.26	350.3	2.22222	up	NM_012889 // M84488	RefSeq // GenBank	Rattus norvegicus vascular cell adhesion molecule 1 (Vcam1), mRNA. // Rat vascular cell adhesion molecule-1 mRNA, complete cds.	chr2	-	212277648	212297394	GO:0001666 // GO:0002526 // GO:0002544 // GO:0007155 // GO:0007155 // GO:0007155 // GO:0007157 // GO:0007157 // GO:0007159 // GO:0007507 // GO:0007507 // GO:0007568 // GO:0007584 // GO:0010043 // GO:0010212 // GO:0019048 // GO:0022614 // GO:0022614 // GO:0032496 // GO:0035094 // GO:0035924 // GO:0042102 // GO:0042102 // GO:0045471 // GO:0050901 // GO:0050901 // GO:0060326 // GO:0060669 // GO:0060…	response to hypoxia // acute inflammatory response // chronic inflammatory response // cell adhesion // cell adhesion // cell adhesion // heterophilic cell-cell adhesion // heterophilic cell-cell adhesion // leukocyte cell-cell adhesion // heart development // heart development // aging // response to nutrient // response to zinc ion // response to ionizing radiation // virus-host interaction // …	inferred from expression pattern // inferred from expression pattern // inferred from expression pattern // inferred from mutant phenotype // not recorded // traceable author statement // inferred from electronic annotation // not recorded // not recorded // inferred from electronic annotation // not recorded // inferred from expression pattern // inferred from expression pattern // inferred from…	GO:0002102 // GO:0002102 // GO:0005615 // GO:0005615 // GO:0005902 // GO:0005902 // GO:0009897 // GO:0009897 // GO:0009986 // GO:0009986 // GO:0016021 // GO:0030175 // GO:0030175 // GO:0042383 // GO:0045177 // GO:0045177 // GO:0071065 // GO:0071065 // GO:0071944 // GO:0005615 // GO:0009986 // GO:0016020 // GO:0016021 // GO:0002102 // GO:0002102 // GO:0005615 // GO:0005615 // GO:0005902 // GO:0005…	podosome // podosome // extracellular space // extracellular space // microvillus // microvillus // external side of plasma membrane // external side of plasma membrane // cell surface // cell surface // integral to membrane // filopodium // filopodium // sarcolemma // apical part of cell // apical part of cell // alpha9-beta1 integrin-vascular cell adhesion molecule-1 complex // alpha9-beta1 int…	inferred from electronic annotation // not recorded // inferred from direct assay // not recorded // inferred from electronic annotation // not recorded // inferred from electronic annotation // not recorded // inferred from direct assay // not recorded // traceable author statement // inferred from electronic annotation // not recorded // inferred from direct assay // inferred from electronic an…	GO:0005178 // GO:0005178 // GO:0050839 // GO:0050839 // GO:0005178 // GO:0005178 // GO:0005178 // GO:0050839 // GO:0050839 // GO:0005178	integrin binding // integrin binding // cell adhesion molecule binding // cell adhesion molecule binding // integrin binding // integrin binding // integrin binding // cell adhesion molecule binding // cell adhesion molecule binding // integrin binding	inferred from mutant phenotype // not recorded // inferred from electronic annotation // not recorded // inferred from electronic annotation // inferred from mutant phenotype // not recorded // inferred from electronic annotation // not recorded // inferred from electronic annotation	---	---	---	---	---	main	7.57093	7.62967	6.74544	8.07449	9.27026	8.06547
10872266	Rnf19b	ring finger protein 19B	0.0050246	0.26	137.13	303.54	2.22222	up	NM_001108003 // ENSRNOT00000066268	RefSeq // ENSEMBL	Rattus norvegicus ring finger protein 19B (Rnf19b), mRNA. // cdna:known chromosome:Rnor_5.0:5:150992439:151005653:1 gene:ENSRNOG00000000123 gene_biotype:protein_coding transcript_biotype:protein_coding	chr5	+	148218881	148241708	---	---	---	---	---	---	GO:0005515	protein binding	inferred from electronic annotation	---	---	---	---	---	main	7.21679	7.33838	6.77045	7.7333	8.80626	8.25051
10872876	Il22ra1	interleukin 22 receptor, alpha 1	0.0024032	0.205	32.98	73.28	2.22222	up	NM_001191869 // ENSRNOT00000031512	RefSeq // ENSEMBL	Rattus norvegicus interleukin 22 receptor, alpha 1 (Il22ra1), mRNA. // cdna:known chromosome:Rnor_5.0:5:157843037:157867847:1 gene:ENSRNOG00000027976 gene_biotype:protein_coding transcript_biotype:protein_coding	chr5	+	154495319	154526725	GO:0050829 // GO:0008150 // GO:0050829 // GO:0050829 // GO:0008150 // GO:0050829	defense response to Gram-negative bacterium // biological_process // defense response to Gram-negative bacterium // defense response to Gram-negative bacterium // biological_process // defense response to Gram-negative bacterium	not recorded // no biological data available // inferred from electronic annotation // not recorded // no biological data available // inferred from electronic annotation	GO:0005575 // GO:0005575	cellular_component // cellular_component	no biological data available // no biological data available	GO:0042015 // GO:0003674 // GO:0042015 // GO:0042015 // GO:0005515 // GO:0003674 // GO:0042015	interleukin-20 binding // molecular_function // interleukin-20 binding // interleukin-20 binding // protein binding // molecular_function // interleukin-20 binding	not recorded // no biological data available // inferred from electronic annotation // not recorded // inferred from electronic annotation // no biological data available // inferred from electronic annotation	---	---	Pfam	IPR015373	Interferon alpha/beta receptor, beta chain	main	5.30975	4.76039	5.08804	5.87407	6.73355	6.03105
10889728	Arl4a	ADP-ribosylation factor-like 4A	0.0045899	0.254	77.77	173.52	2.22222	up	ENSRNOT00000005800 // NM_019186 // BC088148	ENSEMBL // RefSeq // GenBank	cdna:known chromosome:Rnor_5.0:6:69536689:69538783:-1 gene:ENSRNOG00000004282 gene_biotype:protein_coding transcript_biotype:protein_coding // Rattus norvegicus ADP-ribosylation factor-like 4A (Arl4a), mRNA. // Rattus norvegicus ADP-ribosylation factor-like 4A, mRNA (cDNA clone MGC:108709 IMAGE:7373646), complete cds.	chr6	-	59187305	59214695	GO:0007264 // GO:0050873 // GO:0050873 // GO:0007165 // GO:0006184 // GO:0006886 // GO:0015031 // GO:0007264 // GO:0050873 // GO:0050873 // GO:0007264 // GO:0050873 // GO:0050873	small GTPase mediated signal transduction // brown fat cell differentiation // brown fat cell differentiation // signal transduction // GTP catabolic process // intracellular protein transport // protein transport // small GTPase mediated signal transduction // brown fat cell differentiation // brown fat cell differentiation // small GTPase mediated signal transduction // brown fat cell different…	inferred from electronic annotation // inferred from electronic annotation // not recorded // inferred from electronic annotation // inferred from electronic annotation // inferred from electronic annotation // inferred from electronic annotation // inferred from electronic annotation // inferred from electronic annotation // not recorded // inferred from electronic annotation // inferred from el…	GO:0005634 // GO:0005634 // GO:0005730 // GO:0005730 // GO:0005737 // GO:0005886 // GO:0005886 // GO:0005886 // GO:0005622 // GO:0016020 // GO:0005634 // GO:0005730 // GO:0005634 // GO:0005634 // GO:0005730 // GO:0005730 // GO:0005737 // GO:0005886 // GO:0005886 // GO:0005622 // GO:0005634 // GO:0005730 // GO:0005886 // GO:0016020 // GO:0005634 // GO:0005634 // GO:0005730 // GO:0005730 // GO:0005…	nucleus // nucleus // nucleolus // nucleolus // cytoplasm // plasma membrane // plasma membrane // plasma membrane // intracellular // membrane // nucleus // nucleolus // nucleus // nucleus // nucleolus // nucleolus // cytoplasm // plasma membrane // plasma membrane // intracellular // nucleus // nucleolus // plasma membrane // membrane // nucleus // nucleus // nucleolus // nucleolus // cytoplasm…	not recorded // inferred from sequence or structural similarity // not recorded // inferred from sequence or structural similarity // inferred from electronic annotation // not recorded // inferred from sequence or structural similarity // inferred from electronic annotation // inferred from electronic annotation // inferred from electronic annotation // inferred from electronic annotation // inf…	GO:0005525 // GO:0005525 // GO:0005515 // GO:0003924 // GO:0000166 // GO:0005525 // GO:0005525 // GO:0005525 // GO:0000166 // GO:0005525 // GO:0005525 // GO:0005525 // GO:0000166 // GO:0005525	GTP binding // GTP binding // protein binding // GTPase activity // nucleotide binding // GTP binding // GTP binding // GTP binding // nucleotide binding // GTP binding // GTP binding // GTP binding // nucleotide binding // GTP binding	not recorded // inferred from sequence or structural similarity // inferred from electronic annotation // inferred from electronic annotation // inferred from electronic annotation // inferred from electronic annotation // not recorded // inferred from sequence or structural similarity // inferred from electronic annotation // inferred from electronic annotation // not recorded // inferred from s…	---	---	Pfam // Pfam // Pfam // Pfam // Pfam // Pfam	IPR000795 // IPR001806 // IPR006689 // IPR006762 // IPR013684 // IPR019009	Elongation factor, GTP-binding domain // Small GTPase superfamily // Small GTPase superfamily, ARF/SAR type // Gtr1/RagA G protein // Mitochondrial Rho-like // Signal recognition particle receptor, beta subunit	main	6.23954	6.69213	5.93929	6.94377	7.89587	7.53013
10927612	Tbc1d8	TBC1 domain family, member 8	0.0003711	0.141	63.72	142.4	2.22222	up	NM_001191067 // ENSRNOT00000018640 // GENSCAN00000038759 // GENSCAN00000002493	RefSeq // ENSEMBL // ENSEMBL // ENSEMBL	Rattus norvegicus TBC1 domain family, member 8 (Tbc1d8), mRNA. // cdna:known chromosome:Rnor_5.0:9:45778865:45893709:-1 gene:ENSRNOG00000013583 gene_biotype:protein_coding transcript_biotype:protein_coding // cdna:genscan chromosome:Rnor_5.0:9:45779373:45813750:-1 transcript_biotype:protein_coding // cdna:genscan chromosome:Rnor_5.0:9:45831030:45893532:-1 transcript_biotype:protein_coding	chr9	-	38443933	38554006	GO:0032313 // GO:0032851 // GO:0032313 // GO:0032851	regulation of Rab GTPase activity // positive regulation of Rab GTPase activity // regulation of Rab GTPase activity // positive regulation of Rab GTPase activity	inferred from electronic annotation // inferred from electronic annotation // inferred from electronic annotation // inferred from electronic annotation	GO:0005622 // GO:0005622	intracellular // intracellular	inferred from electronic annotation // inferred from electronic annotation	GO:0005097 // GO:0005509 // GO:0005097 // GO:0005509	Rab GTPase activator activity // calcium ion binding // Rab GTPase activator activity // calcium ion binding	inferred from electronic annotation // inferred from electronic annotation // inferred from electronic annotation // inferred from electronic annotation	---	---	Pfam // Pfam	IPR000195 // IPR004182	Rab-GTPase-TBC domain // GRAM	main	6.18371	6.06317	5.76154	7.06803	7.49031	6.95595
10738934	Mettl2b	methyltransferase like 2B	7.1e-06	0.0246	29.31	63.49	2.17391	up	NM_001108839 // ENSRNOT00000008140	RefSeq // ENSEMBL	Rattus norvegicus methyltransferase like 2B (Mettl2b), mRNA. // cdna:known chromosome:Rnor_5.0:10:93112426:93126251:1 gene:ENSRNOG00000006131 gene_biotype:protein_coding transcript_biotype:protein_coding	chr10	+	94522904	94536478	GO:0030488 // GO:0032259 // GO:0030488 // GO:0008152 // GO:0032259	tRNA methylation // methylation // tRNA methylation // metabolic process // methylation	not recorded // inferred from electronic annotation // not recorded // inferred from electronic annotation // inferred from electronic annotation	---	---	---	GO:0008168 // GO:0016427 // GO:0016740 // GO:0008168 // GO:0016427 // GO:0016740	methyltransferase activity // tRNA (cytosine) methyltransferase activity // transferase activity // methyltransferase activity // tRNA (cytosine) methyltransferase activity // transferase activity	inferred from electronic annotation // not recorded // inferred from electronic annotation // inferred from electronic annotation // not recorded // inferred from electronic annotation	---	---	Pfam // Pfam // Pfam	IPR004033 // IPR013216 // IPR013217	UbiE/COQ5 methyltransferase // Methyltransferase type 11 // Methyltransferase type 12	main	4.86563	4.78329	4.99919	6.05449	6.04314	5.92066
10771190	Abcg3l3	ATP-binding cassette, subfamily G (WHITE), member 3-like 3	0.0273257	0.428	24.28	52.25	2.17391	up	NM_001107205 // ENSRNOT00000061267	RefSeq // ENSEMBL	Rattus norvegicus ATP-binding cassette, subfamily G (WHITE), member 3-like 3 (Abcg3l3), mRNA. // cdna:known chromosome:Rnor_5.0:14:6037995:6083614:1 gene:ENSRNOG00000039890 gene_biotype:protein_coding transcript_biotype:protein_coding	chr14	+	5965433	5998404	GO:0006200 // GO:0006200	ATP catabolic process // ATP catabolic process	inferred from electronic annotation // inferred from electronic annotation	GO:0016020 // GO:0016020	membrane // membrane	inferred from electronic annotation // inferred from electronic annotation	GO:0005524 // GO:0016887 // GO:0005524 // GO:0016887	ATP binding // ATPase activity // ATP binding // ATPase activity	inferred from electronic annotation // inferred from electronic annotation // inferred from electronic annotation // inferred from electronic annotation	---	---	Pfam // Pfam	IPR003439 // IPR013525	ABC transporter-like // ABC-2 type transporter	main	5.45602	4.67828	3.69761	5.79933	5.70467	5.67101
10781166	Clu	clusterin	0.0021114	0.199	560.14	1208.13	2.17391	up	NM_053021 // ENSRNOT00000022095 // M16975	RefSeq // ENSEMBL // GenBank	Rattus norvegicus clusterin (Clu), mRNA. // cdna:known chromosome:Rnor_5.0:15:48926516:48939266:-1 gene:ENSRNOG00000016460 gene_biotype:protein_coding transcript_biotype:protein_coding // Rat sulfated glycoprotein 2 mRNA, complete cds.	chr15	+	45365779	45405323	GO:0006915 // GO:0006950 // GO:0006979 // GO:0007283 // GO:0008284 // GO:0009611 // GO:0009615 // GO:0009615 // GO:0031018 // GO:0032436 // GO:0032436 // GO:0032436 // GO:0032463 // GO:0032463 // GO:0032463 // GO:0043065 // GO:0043065 // GO:0043065 // GO:0043066 // GO:0043066 // GO:0043066 // GO:0043066 // GO:0045597 // GO:0048812 // GO:0050821 // GO:0050821 // GO:0050821 // GO:0051092 // GO:0051…	apoptotic process // response to stress // response to oxidative stress // spermatogenesis // positive regulation of cell proliferation // response to wounding // response to virus // response to virus // endocrine pancreas development // positive regulation of proteasomal ubiquitin-dependent protein catabolic process // positive regulation of proteasomal ubiquitin-dependent protein catabolic pro…	traceable author statement // inferred from expression pattern // inferred from expression pattern // inferred from electronic annotation // inferred from mutant phenotype // inferred from expression pattern // inferred from electronic annotation // not recorded // inferred from mutant phenotype // inferred from electronic annotation // not recorded // inferred from sequence or structural similar…	GO:0005615 // GO:0005615 // GO:0005634 // GO:0005739 // GO:0005739 // GO:0005783 // GO:0005829 // GO:0016235 // GO:0030426 // GO:0031012 // GO:0031012 // GO:0031012 // GO:0031966 // GO:0034366 // GO:0034366 // GO:0034366 // GO:0042583 // GO:0043005 // GO:0048471 // GO:0048471 // GO:0048471 // GO:0005576 // GO:0005737 // GO:0016020 // GO:0031410 // GO:0043231 // GO:0005615 // GO:0005615 // GO:0005…	extracellular space // extracellular space // nucleus // mitochondrion // mitochondrion // endoplasmic reticulum // cytosol // aggresome // growth cone // extracellular matrix // extracellular matrix // extracellular matrix // mitochondrial membrane // spherical high-density lipoprotein particle // spherical high-density lipoprotein particle // spherical high-density lipoprotein particle // chrom…	not recorded // inferred from sequence or structural similarity // inferred from electronic annotation // inferred from electronic annotation // not recorded // inferred from electronic annotation // inferred from electronic annotation // inferred from direct assay // inferred from direct assay // inferred from electronic annotation // not recorded // inferred from sequence or structural similari…	GO:0005515 // GO:0016887 // GO:0016887 // GO:0031625 // GO:0031625 // GO:0031625 // GO:0051787 // GO:0051787 // GO:0051787 // GO:0005515 // GO:0016887 // GO:0016887 // GO:0031625 // GO:0031625 // GO:0031625 // GO:0051787 // GO:0051787 // GO:0051787 // GO:0005515 // GO:0005515 // GO:0016887 // GO:0016887 // GO:0031625 // GO:0031625 // GO:0031625 // GO:0051787 // GO:0051787 // GO:0051787	protein binding // ATPase activity // ATPase activity // ubiquitin protein ligase binding // ubiquitin protein ligase binding // ubiquitin protein ligase binding // misfolded protein binding // misfolded protein binding // misfolded protein binding // protein binding // ATPase activity // ATPase activity // ubiquitin protein ligase binding // ubiquitin protein ligase binding // ubiquitin protein …	inferred from physical interaction // not recorded // inferred from sequence or structural similarity // inferred from electronic annotation // not recorded // inferred from sequence or structural similarity // inferred from electronic annotation // not recorded // inferred from sequence or structural similarity // inferred from physical interaction // not recorded // inferred from sequence or st…	---	---	Pfam	IPR000753	Clusterin-like	main	9.02993	9.36943	9.01708	9.88854	10.7616	10.1184
10800997	Slc4a9	solute carrier family 4, sodium bicarbonate cotransporter, member 9	0.000424	0.143	69.65	152.54	2.17391	up	NM_152938 // ENSRNOT00000025137 // AB024339	RefSeq // ENSEMBL // GenBank	Rattus norvegicus solute carrier family 4, sodium bicarbonate cotransporter, member 9 (Slc4a9), mRNA. // cdna:known chromosome:Rnor_5.0:18:29059313:29072105:1 gene:ENSRNOG00000018525 gene_biotype:protein_coding transcript_biotype:protein_coding // Rattus norvegicus AE4 mRNA for anion exchanger 4, complete cds.	chr18	+	29166521	29182748	GO:0006820 // GO:0006810 // GO:0006811 // GO:0006820 // GO:0006820 // GO:0006810 // GO:0006820 // GO:0006811 // GO:0006820 // GO:0006810 // GO:0006811 // GO:0006820	anion transport // transport // ion transport // anion transport // anion transport // transport // anion transport // ion transport // anion transport // transport // ion transport // anion transport	inferred from direct assay // inferred from electronic annotation // inferred from electronic annotation // inferred from electronic annotation // inferred from direct assay // inferred from electronic annotation // inferred from electronic annotation // inferred from electronic annotation // inferred from direct assay // inferred from electronic annotation // inferred from electronic annotation …	GO:0016021 // GO:0016323 // GO:0045177 // GO:0005886 // GO:0016020 // GO:0016323 // GO:0016021 // GO:0016323 // GO:0045177 // GO:0016020 // GO:0045177 // GO:0005886 // GO:0016323 // GO:0016021 // GO:0016323 // GO:0045177 // GO:0005886 // GO:0016020 // GO:0016323	integral to membrane // basolateral plasma membrane // apical part of cell // plasma membrane // membrane // basolateral plasma membrane // integral to membrane // basolateral plasma membrane // apical part of cell // membrane // apical part of cell // plasma membrane // basolateral plasma membrane // integral to membrane // basolateral plasma membrane // apical part of cell // plasma membrane //…	inferred from electronic annotation // inferred from direct assay // not recorded // inferred from electronic annotation // inferred from electronic annotation // inferred from electronic annotation // inferred from electronic annotation // inferred from direct assay // not recorded // inferred from electronic annotation // inferred from electronic annotation // inferred from electronic annotatio…	GO:0005452 // GO:0015301 // GO:0005215 // GO:0008509 // GO:0015297 // GO:0015301 // GO:0005452 // GO:0015301 // GO:0005215 // GO:0008509 // GO:0015297 // GO:0015301 // GO:0005452 // GO:0015301 // GO:0005215 // GO:0008509 // GO:0015297 // GO:0015301	inorganic anion exchanger activity // anion:anion antiporter activity // transporter activity // anion transmembrane transporter activity // antiporter activity // anion:anion antiporter activity // inorganic anion exchanger activity // anion:anion antiporter activity // transporter activity // anion transmembrane transporter activity // antiporter activity // anion:anion antiporter activity // i…	inferred from electronic annotation // inferred from direct assay // inferred from electronic annotation // inferred from electronic annotation // inferred from electronic annotation // inferred from electronic annotation // inferred from electronic annotation // inferred from direct assay // inferred from electronic annotation // inferred from electronic annotation // inferred from electronic an…	---	---	Pfam // Pfam	IPR011531 // IPR013769	Bicarbonate transporter, C-terminal // Band 3 cytoplasmic domain	main	6.25163	5.95408	6.18785	7.27211	6.90765	7.63229
10841789	Ppp1r16b	protein phosphatase 1, regulatory subunit 16B	0.0111639	0.339	360.63	781.67	2.17391	up	NM_001191072 // ENSRNOT00000021133	RefSeq // ENSEMBL	Rattus norvegicus protein phosphatase 1, regulatory subunit 16B (Ppp1r16b), mRNA. // cdna:known chromosome:Rnor_5.0:3:160348036:160448839:-1 gene:ENSRNOG00000015614 gene_biotype:protein_coding transcript_biotype:protein_coding	chr3	+	149432753	149496290	---	---	---	GO:0005634 // GO:0005634 // GO:0005886 // GO:0005634 // GO:0005634 // GO:0005886	nucleus // nucleus // plasma membrane // nucleus // nucleus // plasma membrane	inferred from electronic annotation // not recorded // not recorded // inferred from electronic annotation // not recorded // not recorded	GO:0005515	protein binding	inferred from electronic annotation	---	---	Pfam	IPR002110	Ankyrin repeat	main	9.0766	8.45128	7.98275	10.1034	9.60529	9.17543
10874193	Errfi1	ERBB receptor feedback inhibitor 1	0.0085863	0.316	1772.81	3869.7	2.17391	up	NM_001014071 // BC083845 // ENSRNOT00000071036	RefSeq // GenBank // ENSEMBL	Rattus norvegicus ERBB receptor feedback inhibitor 1 (Errfi1), mRNA. // Rattus norvegicus ERBB receptor feedback inhibitor 1, mRNA (cDNA clone MGC:95004 IMAGE:7121187), complete cds. // cdna:known_by_projection chromosome:Rnor_5.0:5:171529356:171541439:1 gene:ENSRNOG00000049653 gene_biotype:protein_coding transcript_biotype:protein_coding	chr5	+	168012683	168025963	GO:0007175 // GO:0007175 // GO:0007175 // GO:0031953 // GO:0031953 // GO:0042059 // GO:0043589 // GO:0043589 // GO:0045616 // GO:0045616 // GO:0048286 // GO:0048286 // GO:0050732 // GO:0050732 // GO:0060426 // GO:0060426 // GO:0060428 // GO:0060428 // GO:0007175 // GO:0007175 // GO:0007175 // GO:0031953 // GO:0031953 // GO:0042059 // GO:0043589 // GO:0043589 // GO:0045616 // GO:0045616 // GO:0048…	negative regulation of epidermal growth factor-activated receptor activity // negative regulation of epidermal growth factor-activated receptor activity // negative regulation of epidermal growth factor-activated receptor activity // negative regulation of protein autophosphorylation // negative regulation of protein autophosphorylation // negative regulation of epidermal growth factor receptor s…	inferred from direct assay // not recorded // inferred from sequence or structural similarity // not recorded // inferred from sequence or structural similarity // not recorded // not recorded // inferred from sequence or structural similarity // not recorded // inferred from sequence or structural similarity // not recorded // inferred from sequence or structural similarity // inferred from dire…	GO:0005634 // GO:0005737 // GO:0005737 // GO:0031234 // GO:0031234 // GO:0005737 // GO:0005886 // GO:0016020 // GO:0005634 // GO:0005737 // GO:0005737 // GO:0031234 // GO:0031234 // GO:0005737 // GO:0005886 // GO:0016020 // GO:0005737 // GO:0031234 // GO:0005634 // GO:0005737 // GO:0005886 // GO:0016020 // GO:0031234	nucleus // cytoplasm // cytoplasm // extrinsic to internal side of plasma membrane // extrinsic to internal side of plasma membrane // cytoplasm // plasma membrane // membrane // nucleus // cytoplasm // cytoplasm // extrinsic to internal side of plasma membrane // extrinsic to internal side of plasma membrane // cytoplasm // plasma membrane // membrane // cytoplasm // extrinsic to internal side o…	inferred from electronic annotation // not recorded // inferred from sequence or structural similarity // not recorded // inferred from sequence or structural similarity // inferred from electronic annotation // inferred from electronic annotation // inferred from electronic annotation // inferred from electronic annotation // not recorded // inferred from sequence or structural similarity // not…	GO:0019900 // GO:0019901 // GO:0019900 // GO:0019901 // GO:0005515 // GO:0019901 // GO:0019900	kinase binding // protein kinase binding // kinase binding // protein kinase binding // protein binding // protein kinase binding // kinase binding	inferred from physical interaction // not recorded // inferred from physical interaction // not recorded // inferred from electronic annotation // inferred from electronic annotation // inferred from physical interaction	---	---	Pfam // Pfam	IPR015116 // IPR021619	Cdc42 binding domain like // EGFR receptor inhibitor Mig-6	main	10.6831	11.5368	10.1831	11.9431	11.8944	11.9695
10937867	LOC100362769	hypothetical protein LOC100362769	0.000964	0.175	1818.11	3915.16	2.17391	up	ENSRNOT00000058957 // XM_003754778 // GENSCAN00000023201	ENSEMBL // RefSeq // ENSEMBL	cdna:pseudogene chromosome:Rnor_5.0:X:36112792:36113182:-1 gene:ENSRNOG00000038624 gene_biotype:pseudogene transcript_biotype:pseudogene // PREDICTED: Rattus norvegicus hypothetical protein LOC100362769 (LOC100362769), mRNA. // cdna:genscan chromosome:Rnor_5.0:X:36077773:36120483:-1 transcript_biotype:protein_coding	chrX	-	55288526	55288708	---	---	---	---	---	---	---	---	---	---	---	---	---	---	main	10.7826	11.2691	10.4605	11.8353	12.0203	12.0018
10717331	Sgk1	serum/glucocorticoid regulated kinase 1	0.0050578	0.26	1088.12	2294.67	2.12766	up	ENSRNOT00000016121 // NM_019232 // NM_001193568 // NM_001193569 // ENSRNOT00000061157 // ENSRNOT00000040736 // L01624	ENSEMBL // RefSeq // RefSeq // RefSeq // ENSEMBL // ENSEMBL // GenBank	cdna:known chromosome:Rnor_5.0:1:25652755:25658195:-1 gene:ENSRNOG00000011815 gene_biotype:protein_coding transcript_biotype:protein_coding // Rattus norvegicus serum/glucocorticoid regulated kinase 1 (Sgk1), transcript variant 3, mRNA. // Rattus norvegicus serum/glucocorticoid regulated kinase 1 (Sgk1), transcript variant 1, mRNA. // Rattus norvegicus serum/glucocorticoid regulated kinase 1 (Sgk…	chr1	-	23501257	23637472	GO:0006468 // GO:0006468 // GO:0006883 // GO:0006915 // GO:0006950 // GO:0006974 // GO:0006974 // GO:0007019 // GO:0007154 // GO:0007616 // GO:0008542 // GO:0010765 // GO:0018105 // GO:0030307 // GO:0031115 // GO:0032869 // GO:0032880 // GO:0043066 // GO:0043402 // GO:0048812 // GO:0050775 // GO:0051726 // GO:0006468 // GO:0016310 // GO:0006468 // GO:0006468 // GO:0006883 // GO:0006915 // GO:0006…	protein phosphorylation // protein phosphorylation // cellular sodium ion homeostasis // apoptotic process // response to stress // response to DNA damage stimulus // response to DNA damage stimulus // microtubule depolymerization // cell communication // long-term memory // visual learning // positive regulation of sodium ion transport // peptidyl-serine phosphorylation // positive regulation of…	not recorded // traceable author statement // inferred from direct assay // inferred from electronic annotation // inferred from electronic annotation // inferred from electronic annotation // not recorded // inferred from direct assay // inferred from electronic annotation // inferred from mutant phenotype // inferred from mutant phenotype // inferred from mutant phenotype // inferred from direc…	GO:0005634 // GO:0005737 // GO:0005739 // GO:0005789 // GO:0005886 // GO:0043005 // GO:0048471 // GO:0005634 // GO:0005737 // GO:0005783 // GO:0016020 // GO:0005634 // GO:0005737 // GO:0005739 // GO:0005789 // GO:0005886 // GO:0043005 // GO:0048471 // GO:0005634 // GO:0005737 // GO:0005783 // GO:0016020 // GO:0005634 // GO:0005737 // GO:0005739 // GO:0005789 // GO:0005886 // GO:0043005 // GO:0048…	nucleus // cytoplasm // mitochondrion // endoplasmic reticulum membrane // plasma membrane // neuron projection // perinuclear region of cytoplasm // nucleus // cytoplasm // endoplasmic reticulum // membrane // nucleus // cytoplasm // mitochondrion // endoplasmic reticulum membrane // plasma membrane // neuron projection // perinuclear region of cytoplasm // nucleus // cytoplasm // endoplasmic re…	inferred from direct assay // inferred from direct assay // inferred from electronic annotation // inferred from electronic annotation // inferred from electronic annotation // inferred from direct assay // inferred from direct assay // inferred from electronic annotation // inferred from electronic annotation // inferred from electronic annotation // inferred from electronic annotation // inferr…	GO:0004672 // GO:0004674 // GO:0004674 // GO:0004674 // GO:0005524 // GO:0035091 // GO:0043423 // GO:0048037 // GO:0048156 // GO:0005515 // GO:0004672 // GO:0004713 // GO:0016772 // GO:0000166 // GO:0016301 // GO:0016740 // GO:0004672 // GO:0004674 // GO:0004674 // GO:0004674 // GO:0005524 // GO:0035091 // GO:0043423 // GO:0048037 // GO:0048156 // GO:0000166 // GO:0004672 // GO:0016301 // GO:0016…	protein kinase activity // protein serine/threonine kinase activity // protein serine/threonine kinase activity // protein serine/threonine kinase activity // ATP binding // phosphatidylinositol binding // 3-phosphoinositide-dependent protein kinase binding // cofactor binding // tau protein binding // protein binding // protein kinase activity // protein tyrosine kinase activity // transferase a…	not recorded // inferred from direct assay // inferred from electronic annotation // traceable author statement // inferred from electronic annotation // inferred from electronic annotation // inferred from physical interaction // inferred from physical interaction // inferred from physical interaction // inferred from electronic annotation // inferred from electronic annotation // inferred from …	---	---	Pfam // Pfam // Pfam // Pfam // Pfam // Pfam // Pfam // Pfam // Pfam	IPR000719 // IPR001245 // IPR017892 // IPR000719 // IPR001245 // IPR017892 // IPR000719 // IPR001245 // IPR017892	Protein kinase, catalytic domain // Serine-threonine/tyrosine-protein kinase catalytic domain // Protein kinase, C-terminal // Protein kinase, catalytic domain // Serine-threonine/tyrosine-protein kinase catalytic domain // Protein kinase, C-terminal // Protein kinase, catalytic domain // Serine-threonine/tyrosine-protein kinase catalytic domain // Protein kinase, C-terminal	main	10.0723	10.6579	9.56027	11.0146	11.1471	11.3833
10726929	Dusp8	dual specificity phosphatase 8	0.0017765	0.199	39.9	84.98	2.12766	up	ENSRNOT00000044565 // NM_001108510	ENSEMBL // RefSeq	cdna:known chromosome:Rnor_5.0:1:221943575:221950984:-1 gene:ENSRNOG00000029394 gene_biotype:protein_coding transcript_biotype:protein_coding // Rattus norvegicus dual specificity phosphatase 8 (Dusp8), mRNA.	chr1	-	202215085	202225221	GO:0006470 // GO:0016311 // GO:0035335	protein dephosphorylation // dephosphorylation // peptidyl-tyrosine dephosphorylation	inferred from electronic annotation // inferred from electronic annotation // inferred from electronic annotation	---	---	---	GO:0008138 // GO:0016791 // GO:0004725 // GO:0016787 // GO:0017017	protein tyrosine/serine/threonine phosphatase activity // phosphatase activity // protein tyrosine phosphatase activity // hydrolase activity // MAP kinase tyrosine/serine/threonine phosphatase activity	inferred from electronic annotation // inferred from electronic annotation // inferred from electronic annotation // inferred from electronic annotation // inferred from electronic annotation	---	---	Pfam	IPR000340	Dual specificity phosphatase, catalytic domain	main	5.09687	5.57247	5.31318	5.94828	6.59786	6.73392
10741956	Kcnip1	Kv channel-interacting protein 1	0.0067257	0.291	24.71	52.58	2.12766	up	NM_001261389 // ENSRNOT00000007187 // NM_001261387 // NM_022929 // ENSRNOT00000040737 // NM_001261388 // AY082657	RefSeq // ENSEMBL // RefSeq // RefSeq // ENSEMBL // RefSeq // GenBank	Rattus norvegicus Kv channel-interacting protein 1 (Kcnip1), transcript variant 3, mRNA. // cdna:known chromosome:Rnor_5.0:10:18444651:18663340:-1 gene:ENSRNOG00000005365 gene_biotype:protein_coding transcript_biotype:protein_coding // Rattus norvegicus Kv channel-interacting protein 1 (Kcnip1), transcript variant 1, mRNA. // Rattus norvegicus Kv channel-interacting protein 1 (Kcnip1), transcript…	chr10	-	18549984	18964642	GO:0045760 // GO:0006810 // GO:0006811 // GO:0006813 // GO:0034765 // GO:0071805 // GO:0045760 // GO:0007165 // GO:0006810 // GO:0006811 // GO:0006813 // GO:0034765 // GO:0071805 // GO:0045760 // GO:0006810 // GO:0006811 // GO:0006813 // GO:0034765 // GO:0071805 // GO:0045760 // GO:0006810 // GO:0006811 // GO:0006813 // GO:0034765 // GO:0071805 // GO:0045760 // GO:0007165 // GO:0006810 // GO:0006…	positive regulation of action potential // transport // ion transport // potassium ion transport // regulation of ion transmembrane transport // potassium ion transmembrane transport // positive regulation of action potential // signal transduction // transport // ion transport // potassium ion transport // regulation of ion transmembrane transport // potassium ion transmembrane transport // posi…	inferred from direct assay // inferred from electronic annotation // inferred from electronic annotation // inferred from electronic annotation // inferred from electronic annotation // inferred from electronic annotation // inferred from direct assay // inferred from electronic annotation // inferred from electronic annotation // inferred from electronic annotation // inferred from electronic an…	GO:0005886 // GO:0030425 // GO:0034705 // GO:0043025 // GO:0005886 // GO:0016020 // GO:0005886 // GO:0030425 // GO:0034705 // GO:0043025 // GO:0005578 // GO:0005886 // GO:0016020 // GO:0005886 // GO:0030425 // GO:0034705 // GO:0043025 // GO:0005886 // GO:0016020 // GO:0005886 // GO:0030425 // GO:0034705 // GO:0043025 // GO:0005886 // GO:0016020 // GO:0005886 // GO:0030425 // GO:0034705 // GO:0043…	plasma membrane // dendrite // potassium channel complex // neuronal cell body // plasma membrane // membrane // plasma membrane // dendrite // potassium channel complex // neuronal cell body // proteinaceous extracellular matrix // plasma membrane // membrane // plasma membrane // dendrite // potassium channel complex // neuronal cell body // plasma membrane // membrane // plasma membrane // den…	inferred from direct assay // inferred from direct assay // inferred from direct assay // inferred from direct assay // inferred from electronic annotation // inferred from electronic annotation // inferred from direct assay // inferred from direct assay // inferred from direct assay // inferred from direct assay // inferred from electronic annotation // inferred from electronic annotation // inf…	GO:0005244 // GO:0005267 // GO:0005509 // GO:0015459 // GO:0044325 // GO:0046982 // GO:0047485 // GO:0005509 // GO:0046872 // GO:0005244 // GO:0005267 // GO:0005509 // GO:0015459 // GO:0044325 // GO:0046982 // GO:0047485 // GO:0005515 // GO:0005509 // GO:0046872 // GO:0005244 // GO:0005267 // GO:0005509 // GO:0015459 // GO:0044325 // GO:0046982 // GO:0047485 // GO:0005509 // GO:0046872 // GO:0005…	voltage-gated ion channel activity // potassium channel activity // calcium ion binding // potassium channel regulator activity // ion channel binding // protein heterodimerization activity // protein N-terminus binding // calcium ion binding // metal ion binding // voltage-gated ion channel activity // potassium channel activity // calcium ion binding // potassium channel regulator activity // i…	inferred from electronic annotation // inferred from electronic annotation // inferred from direct assay // inferred from direct assay // inferred from physical interaction // inferred from direct assay // inferred from physical interaction // inferred from electronic annotation // inferred from electronic annotation // inferred from electronic annotation // inferred from electronic annotation //…	---	---	Pfam // Pfam	IPR019577 // IPR019577	SPARC/Testican, calcium-binding domain // SPARC/Testican, calcium-binding domain	main	5.02377	4.70344	4.18085	5.32929	5.63121	6.24152
10751295	Pla1a	phospholipase A1 member A	0.0269695	0.426	45.25	96.13	2.12766	up	ENSRNOT00000038400 // NM_138882 // BC078727	ENSEMBL // RefSeq // GenBank	cdna:known chromosome:Rnor_5.0:11:67166385:67203665:-1 gene:ENSRNOG00000027252 gene_biotype:protein_coding transcript_biotype:protein_coding // Rattus norvegicus phospholipase A1 member A (Pla1a), mRNA. // Rattus norvegicus phospholipase A1 member A, mRNA (cDNA clone MGC:93173 IMAGE:7124402), complete cds.	chr11	+	64099837	64137357	GO:0016042 // GO:0006629 // GO:0016042 // GO:0006629 // GO:0016042 // GO:0006629	lipid catabolic process // lipid metabolic process // lipid catabolic process // lipid metabolic process // lipid catabolic process // lipid metabolic process	inferred from electronic annotation // inferred from electronic annotation // inferred from electronic annotation // inferred from electronic annotation // inferred from electronic annotation // inferred from electronic annotation	GO:0005576 // GO:0005576 // GO:0005576	extracellular region // extracellular region // extracellular region	inferred from electronic annotation // inferred from electronic annotation // inferred from electronic annotation	GO:0016787 // GO:0003824 // GO:0016787 // GO:0003824 // GO:0016787 // GO:0003824	hydrolase activity // catalytic activity // hydrolase activity // catalytic activity // hydrolase activity // catalytic activity	inferred from electronic annotation // inferred from electronic annotation // inferred from electronic annotation // inferred from electronic annotation // inferred from electronic annotation // inferred from electronic annotation	---	---	Pfam	IPR013818	Lipase, N-terminal	main	5.59191	5.69123	5.244	6.46699	7.49551	5.85103
[truncated: 2,279 more rows]

## Sheet: gene-list
Gene Symbol
5430419D17Rik
9130023H24Rik
A4galt
Aagab
Aass
Aatf
Abca1
Abcg3l3
Abhd10
Abhd11
Abhd3
Ablim1
Ablim3
Abtb2
Acaa1a
Acaa1b
Ace
Ace2
Acot12
Acox1
Acsf2
Acsm5
Acvr2a
Acy3
Ada
Adam10
Adam8
Adamts1
Adamts5
Adck5
Adh1
Adh6
Adhfe1
Adm2
Adora1
Adrbk2
Aen
Aff4
Afg3l1
Afm
Agmat
Agmo
Agpat9
Agtr1b
Agxt2
Ahnak2
Aim1
Ajuba
Ak7
Akap12
Akap9
Akr1b8
Akr1c12
Akr1c19
Akr1cl
Akr7a3
Aktip
Alb
Aldh2
Aldh7a1
Alg14
Alg2
Alg3
Alkbh6
Alkbh8
Alpk1
Als2
Alx1
Amhr2
Amica1
Amigo2
Amot
Amotl2
Amph
Amt
Amz2
Anapc1
Angpt4
Angptl3
Angptl4
Ankfn1
Ankib1
Ankrd10
Ankrd12
Ankrd26
Ankrd32
Ankrd39
Ankrd6
Anpep
Aox1
Ap2a1
Ap5s1
Apbb3
Apcs
Apex2l1
Aplnr
Apoe
Apold1
Arap3
Arfgap2
Arglu1
Arhgap12
Arhgap24
Arhgap29
Arhgap31
Arhgap39
Arhgap5
Arhgap6
Arhgap8
Arhgef2
Arid4a
Arid5a
Arl14ep
Arl4a
Arl4c
Arl5b
Arl5c
Arl6ip6
Armc5
Arpc4
Arrb2
Arrdc3
Arvcf
As3mt
Asb11
Asb3
Ascl5
Ash1l
Asic2
Asl
Aspm
Asrgl1
Ass1
Astn1
Atf7
Atg13
Atg2b
Atg7
Atm
Atmin
Atp2b3
Atp2b4
Atp6v0c
Avpr2
Azgp1
Azin1
B3gnt5
B3gntl1
B4galnt1
B4galt6
Baalc
Bach1
Bag1
Bambi
Banp
Baz1b
Bbs1
Bbs10
Bbs12
Bbs7
BC021891
Bcar1
Bcar3
Bcat1
Bckdk
Bcl10
Bcl2l11
Bcl3
Bcorl1
Bcs1l
Bend5
Bet1l
Bhmt
Bid
Bin1
Birc3
Blvra
Blvrb
Bmp3
Bmp4
Bms1
Bola1
Brca2
Bri3bp
Btbd2
Btbd3
Btbd7
Btnl3
C1qtnf2
C1qtnf9
Cacnb2
Cadps
Cadps2
Calcr
Calcrl
Caln1
Camp
Camsap2
Capn1
Capn9
Capns1
Car14
Car15
Car7
Casc4
Caskin2
Casp2
Casq1
Casr
Casz1
Catsper4
Cblb
Cbx3
Cbx5
Ccdc107
Ccdc109b
Ccdc117
Ccdc125
Ccdc126
Ccdc162
Ccdc28a
Ccdc32
Ccdc47
Ccdc62
Ccdc77
Ccdc82
Ccdc86
Ccdc90b
Ccdc93
Ccl17
Ccl2
Ccl20
Ccl27
Ccng2
Ccnjl
Ccr4
Ccrl2
Ccrn4l
Ccser1
Cd14
Cd164
Cd200
Cd302
Cd34
Cd69
Cd7
Cd80
Cd83
Cdc14b
Cdc37l1
Cdc42bpa
Cdc42ep3
Cdc42ep4
Cdc42ep5
Cdh11
Cdh2
Cdh3
Cdh6
Cdip1
Cdk18
Cdkl5
Cdkn1a
Cdkn1b
Cdkn1c
Cdkn2c
Cdx2
Ceacam1
Cebpb
Cenpj
Cenpt
Cep170
Cep290
Cep57l1
Cep68
Cep70
Cep78
Cep95
Ces1e
Ces3a
Cfi
Cftr
Ch25h
Chac2
Chchd10
Chchd5
Chd9
Chml
Chordc1
Chrd
Chst15
Chtop
Cir1
Cirbp
Ckmt1b
Clasp1
Cldn10
Cldn17
Cldn22
Cldn6
Clec14a
Clk1
Clk2
Clstn2
Clu
Cmc1
Cml1
Cmpk2
Cmtm7
Cnot4
Cnot6
Cnot8
Cntnap5a
Cntrl
Coch
Cog1
Cog6
Col8a2
Colec12
Coq10b
Coq6
Cox4i1
Cox4nb
Cox7a2
Cpeb4
Cpne7
Cpped1
Cpsf4
Cpsf7
Cpt2
Cpvl
Crabp2
Crb1
Creb1
Creb3l2
Crebl2
Crem
Crip2
Crnkl1
Crot
Crybg3
Crygc
Cryz
Csf2rb
Csf3r
Csnk1d
Cspp1
Csrnp1
Csrp2
Csrp2bp
Csrp3
Ctage5
Ctcf
Ctgf
Ctif
Ctnna3
Ctsa
Ctsd
Ctsf
Cttnbp2
Cttnbp2nl
Cubn
Cwc15
Cxadr
Cxcl1
Cxcl10
Cxcl11
Cxcl16
Cxcl2
Cxcr5
Cxcr7
Cyb5d1
Cyb5r3
Cycs
Cyfip2
Cyp17a1
Cyp1b1
Cyp24a1
Cyp2d5
Cyp2e1
Cyp2j16
Cyp2j3
Cyp2j4
Cyp2t1
Cyp2u1
Cyp4a1
Cyp4f1
Cyp4f4
Cyp4f6
Cytip
Cyyr1
Daam2
Dab2ip
Dact1
Dapk2
Dapl1
Dbn1
Dcaf17
Dcp2
Dctn6
Dcun1d2
Ddhd1
Ddit4
Ddt
Ddx17
Ddx58
Def8
Defa
Defa-rs1
Degs1
Degs2
Dennd6a
Depdc5
Det1
Dgcr14
Dgka
Dgkz
Dhdds
Dhrs11
Dhtkd1
Dhx37
Diap2
Dido1
Dirc2
Dis3l
Dixdc1
Dlc1
Dlg5
Dll4
Dmrt1
Dnajb9
Dnajc14
Dnajc28
Dnajc3
Dnm1
Dnm3
Dnmbp
Dnmt1
Dolk
Donson
Dos
Dph3
Dpp4
Dppa3
Dpys
Draxin
Dstyk
Dtna
Dusp10
Dusp15
Dusp16
Dusp8
Dut
Dynll1
Dyt1
Dzip1l
Dzip3
E230025N22Rik
Ebpl
Eci1
Eci2
Edem1
Ednrb
Eed
Eef1e1
Eefsec
Efcab5
Efhd1
Efr3b
Egf
Egfl8
Egflam
Egfr
Egln3
Ehhadh
Eid1
Eif1b
Eif2ak3
Eif2ak4
Eif3d
Eif3g
Eif4a1
Eif4e3
Elf5
Elmsan1
Elovl6
Elovl7
Eltd1
Emb
Emd
Enc1
Enpp2
Enpp6
Entpd2
Entpd3
Eogt
Ephb2
Epn3
Eps8
Erc2
Ercc5
Ercc6l2
Erf
Ermp1
Errfi1
Esco1
Esm1
Esrrb
Ethe1
Etl4
Etnk2
Ets2
Eva1b
Evi2a
Exoc8
Exosc5
Exosc7
Exph5
Extl2
Ezh1
Ezr
F2
F2rl1
F3
Fa2h
Fabp3
Fadd
Fads3
Fahd1
Fahd2a
Faim2
Falz
Fam111a
Fam114a1l1
Fam115a
Fam118b
Fam126a
Fam134b
Fam13b
Fam151a
Fam167a
Fam178a
Fam19a3
Fam207a
Fam208b
Fam213b
Fam227b
Fam29a
Fam46b
Fam53b
Fam63a
Fam63b
Fam69b
Fam81a
Fam83g
Fam89b
Fam96a
Fam98c
Far1
Fastkd1
Fastkd5
Fat3
Fbp1
Fbp2
Fbrsl1
Fbxo32
Fbxo4
Fbxo5
Fcgr3a
Fchsd2
Fdps
Fetub
Fga
Fgd5
Fgd6
Fgf9
Fgfrl1
Fhl2
Fhod1
Fig4
Fign
Fitm1
Fjx1
Fkbp5
Flrt1
Flt3
Fmo3
Fmo5
Fndc1
Fnip2
Fosl1
Foxe3
Foxi1
Foxo3
Foxp2
Fpgt
Fpr1
Frmd4b
Fsd1l
Fsip1
Fundc2
Fv1
Fxyd6
Fzd2
Fzd5
G0s2
Gab1
Gabpb2
Gabra1
Gabra4
Gabrp
Gadd45a
Gadd45b
Ganc
Gapt
Gas5
Gatad2a
Gatsl2
Gatsl3
Gca
Gcat
Gcgr
Gcm1
Gcnt1
Gdap2
Gem
Gemin5
Ggcx
Ggps1
Gins4
Giot1
Gja1
Gk5
Glcci1
Gldc
Gltpd1
Gna11
Gna12
Gnat3
Gng11
Gnl2
Golga1
Golgb1
Got2
Gp2
Gpank1
Gpatch1
Gpd1
Gpr116
Gpr137b
Gpr146
Gpr157
Gpr160
Gpr165
Gpr182
Gpr31
Gpr39
Gpr4
Gpr56
Gpr81
Gpr89b
Gpsm2
Gpx1
Gramd1c
Grem1
Grina
Gsk3a
Gsta2
Gsta4
Gsta5
Gstm1
Gsto1
Gstt1
Gtf2a1
Gtf3c4
Gtf3c6
Gtpbp2
Gtpbp4
Gucy1a2
Gucy1b2
Gvinp1
Gypc
Gzmb
H2afx
H2afy2
Hapln1
Haus7
Havcr1
Hbegf
Hcfc1r1
Hcst
Hdac7
Heatr2
Heatr5a
Hebp1
Helz
Herc1
Herpud1
Hexim1
Hey2
Hfe2
Hhip
Hif3a
Hirip3
Hist1h2ail
Hist2h2be
Hist2h4
Hist3h2a
Hlcs
Hlx
Hmcn2
Hmgcl
Hmgcs2
Hmgn3
Hmgxb3
Hmox2
Hnf4a
Hnf4g
Hnmt
Hormad1
Hoxa11
Hoxa2
Hoxa5
Hoxa6
Hoxa9l
Hoxb6
Hoxb7
Hoxc6
Hoxd10
Hp
Hpd
Hrg
Hs6st1
Hspa2
Hspa4l
Hsph1
Htatip2
Hunk
Hus1
Hyal2
HYDIN
Hyls1
Icam1
Icam2
Icoslg
Idi1
Idnk
Idua
Ier5
Ifi44l
Ifit3
Ifngr1
Ifnlr1
Ift81
Ift88
Igfbp1
Igfbp4
Igsf10
Igsf5
Igsf9
Ihh
Il12a
Il17rd
Il1b
Il1r1
Il1rap
Il22ra1
Il23a
Il2ra
Il4
Il4r
Il6
Ilkap
Ilvbl
Incenp
Ing1
Ing3
Inhbb
Inhbc
Inpp4b
Inpp5j
Ipcef1
Ipo4
Iqub
Irak1bp1
Irx1
Isy1
Itpkc
Itpr2
Jph2
Jrk
Jrkl
Kank2
Kansl1l
Kansl2
Kap
Kbtbd11
Kbtbd3
Kcna10
Kcne1
Kcnip1
Kcnj1
Kcnj10
Kcnj13
[truncated: 1,277 more rows]
