# Supplementary material for: Integrative microRNA-gene expression network analysis in genetic hypercalciuric stone-forming rat kidney
Source: PeerJ. 2016 Mar 31;4:e1884. doi: 10.7717/peerj.1884 (PMC4824905; doi:10.7717/peerj.1884)
Supplement: Table S4 — Target mRNAs for differentially expressed miRNAs were predicted using the miRanda database. [file peerj-04-1884-s004.xlsx]

## Sheet: miRanda-target genes
miRNA	Gene_symbol	align_score	energy	miRNA_start	miRNA_end	gene_start	gene_end	miRNA_align	alignment	gene_align
rno-miR-138-1-3p	Aak1	140	-11.65	2	9	3264	3285	3' gggaccacaacacuUCAUCGGc 5'	|||||||	5' ggttgcattttcctAGTAGCCt 3'
rno-miR-138-1-3p	Aard	142	-16.3	2	21	392	412	3' ggGACCACAACACUUCAUCGGc 5'	:|||| | |||||||	5' ttTTGGT-CCATTTAGTAGCCt 3'
rno-miR-138-1-3p	Abcd2	148	-12.6	2	17	2416	2437	3' gggaccACAACACUUCAUCGGc 5'	|||| |||||||	5' actaacTGTTTCCCAGTAGCCt 3'
rno-miR-138-1-3p	Abi2	150	-11.3	2	21	532	552	3' ggGACCACAACACUUCAUCGGc 5'	:| | || | ||||||||	5' gaTTAGACTT-TAAAGTAGCCa 3'
rno-miR-138-1-3p	Abi2	148	-10.38	2	17	1265	1286	3' gggaccACAACACUUCAUCGGc 5'	| | | ||||||||	5' taattaTTTATTTAAGTAGCCt 3'
rno-miR-138-1-3p	Acads	142	-29.48	2	21	397	420	3' ggGACC-A-CAACACUUCAUCGGc 5'	|||| | | || ||||:|||	5' ccCTGGCTAGAGGTCAAGTGGCCg 3'
rno-miR-138-1-3p	Accs	149	-13.89	2	14	18	39	3' gggaccacaACACUUCAUCGGc 5'	| | ||||||||	5' gccattgccTCTCAAGTAGCCa 3'
rno-miR-138-1-3p	Acer1	151	-15.14	2	12	1191	1212	3' gggaccacaacACUUCAUCGGc 5'	||:|||||||	5' cttcacacagaTGGAGTAGCCt 3'
rno-miR-138-1-3p	Acer1	151	-15.14	2	12	1214	1235	3' gggaccacaacACUUCAUCGGc 5'	||:|||||||	5' catcacacagaTGGAGTAGCCt 3'
rno-miR-138-1-3p	Acer1	151	-15.14	2	12	1237	1258	3' gggaccacaacACUUCAUCGGc 5'	||:|||||||	5' catcacacagaTGGAGTAGCCt 3'
rno-miR-138-1-3p	Acer1	151	-15.14	2	12	1260	1281	3' gggaccacaacACUUCAUCGGc 5'	||:|||||||	5' catcacacagaTGGAGTAGCCt 3'
rno-miR-138-1-3p	Acer1	151	-15.14	2	12	1283	1304	3' gggaccacaacACUUCAUCGGc 5'	||:|||||||	5' catcacacagaTGGAGTAGCCt 3'
rno-miR-138-1-3p	Acer1	151	-15.14	2	12	1306	1327	3' gggaccacaacACUUCAUCGGc 5'	||:|||||||	5' catcacacagaTGGAGTAGCCt 3'
rno-miR-138-1-3p	Acer1	151	-15.14	2	12	1329	1350	3' gggaccacaacACUUCAUCGGc 5'	||:|||||||	5' catcacacagaTGGAGTAGCCt 3'
rno-miR-138-1-3p	Acer1	151	-15.14	2	12	1352	1373	3' gggaccacaacACUUCAUCGGc 5'	||:|||||||	5' catcacacagaTGGAGTAGCCt 3'
rno-miR-138-1-3p	Acer1	151	-15.14	2	12	1375	1396	3' gggaccacaacACUUCAUCGGc 5'	||:|||||||	5' catcacacagaTGGAGTAGCCt 3'
rno-miR-138-1-3p	Acer1	151	-15.14	2	12	1398	1419	3' gggaccacaacACUUCAUCGGc 5'	||:|||||||	5' catcacacagaTGGAGTAGCCt 3'
rno-miR-138-1-3p	Acer1	151	-15.14	2	12	1421	1442	3' gggaccacaacACUUCAUCGGc 5'	||:|||||||	5' catcacacagaTGGAGTAGCCt 3'
rno-miR-138-1-3p	Acer1	151	-15.14	2	12	1444	1465	3' gggaccacaacACUUCAUCGGc 5'	||:|||||||	5' catcacacagaTGGAGTAGCCt 3'
rno-miR-138-1-3p	Acer2	147	-16.25	2	21	1464	1486	3' ggGACCACAACA-CUUCAUCGGc 5'	:|| ||| | ||||||||:	5' ctTTGAAGTTTTAGAAGTAGCTt 3'
rno-miR-138-1-3p	Acot7	148	-36.6	3	21	114	135	3' ggGACCACAACACUUCAUCGgc 5'	|||||||||||||||| |	5' agCTGGTGTTGTGAAGTACCgt 3'
rno-miR-138-1-3p	Acot7	146	-19.56	2	16	37	59	3' gggaccaCAACACU-UCAUCGGc 5'	||||||: |||||:|	5' cagcacaGTTGTGGCAGTAGTCc 3'
rno-miR-138-1-3p	Acvrl1	143	-19.67	2	21	867	889	3' ggGACCACAACAC-UUCAUCGGc 5'	|| | | | || ||||:|||	5' gcCTTGAGCTTTGCAAGTGGCCa 3'
rno-miR-138-1-3p	Adam10	147	-23.66	2	20	594	615	3' gggACCACAACACUUCAUCGGc 5'	||||| |||| |||:|:|	5' gaaTGGTGGTGTGCAGTGGTCc 3'
rno-miR-138-1-3p	Adamdec1	147	-18.91	2	18	267	287	3' gggacCACAACACUUCAUCGGc 5'	||| || |||||||:|	5' atcaaGTG-TGGGAAGTAGTCt 3'
rno-miR-138-1-3p	Adat1	149	-17.83	2	14	163	184	3' gggaccacaACACUUCAUCGGc 5'	|| ||||||||	5' gcagctcccTGCTAAGTAGCCt 3'
rno-miR-138-1-3p	Adat1	140	-15.23	2	9	865	886	3' gggaccacaacacuUCAUCGGc 5'	|||||||	5' atcttgtaactgccAGTAGCCa 3'
rno-miR-138-1-3p	Add2	145	-14.91	2	10	295	316	3' gggaccacaacacUUCAUCGGc 5'	||||||||	5' tgggaagggtaaaAAGTAGCCa 3'
rno-miR-138-1-3p	Aen	172	-27.6	2	21	896	917	3' ggGACCACAACACUUCAUCGGc 5'	:||||| || | |||||||	5' ccTTGGTGCTGGGCAGTAGCCa 3'
rno-miR-138-1-3p	Aen	147	-16.57	3	16	180	201	3' gggaccaCAACACUUCAUCGgc 5'	||| |||||||||	5' aattacaGTTATGAAGTAGCaa 3'
rno-miR-138-1-3p	Aff4	151	-18.57	2	21	4470	4492	3' ggGACCACAACA-CUUCAUCGGc 5'	| |||| || |||||||	5' ttCAGGTGAAGTCTCAGTAGCCa 3'
rno-miR-138-1-3p	Agl	154	-17.73	2	21	1671	1695	3' ggGACCAC--AA-CACUUCAUCGGc 5'	|||| | || | ||||||||	5' gtCTGGAGATTTATTAAAGTAGCCa 3'
rno-miR-138-1-3p	Agpat5	140	-13.01	2	9	676	697	3' gggaccacaacacuUCAUCGGc 5'	|||||||	5' ttggcagagcatttAGTAGCCc 3'
rno-miR-138-1-3p	Agr3	142	-14.32	2	19	351	372	3' gggaCCACAACACUUCAUCGGc 5'	||| || |||||||:	5' cataGGTCATGATAAGTAGCTc 3'
rno-miR-138-1-3p	Ahcyl2	150	-21.78	2	11	727	748	3' gggaccacaacaCUUCAUCGGc 5'	|||||||||	5' aactctgctcagGAAGTAGCCa 3'
rno-miR-138-1-3p	aicda	144	-18.08	2	21	1705	1726	3' ggGACCACAACACUUCAUCGGc 5'	| | | || |||||||	5' tgCAGCTATTACCCAGTAGCCg 3'
rno-miR-138-1-3p	Akna	150	-17.77	2	21	404	428	3' ggGACCA-CAAC--ACUUCAUCGGc 5'	:|||| || || |||||||	5' ttTTGGTCACTGCCTGTAGTAGCCa 3'
rno-miR-138-1-3p	Akna	140	-12.32	2	9	198	219	3' gggaccacaacacuUCAUCGGc 5'	|||||||	5' taacaggcaggcatAGTAGCCa 3'
rno-miR-138-1-3p	Aktip	146	-16.22	2	20	301	323	3' gggAC-CACAACACUUCAUCGGc 5'	|| || |||| |||||:|	5' gaaTGAGTACTGTGTAGTAGTCt 3'
rno-miR-138-1-3p	Alas1	140	-13.09	2	9	34	55	3' gggaccacaacacuUCAUCGGc 5'	|||||||	5' taccatacccaaatAGTAGCCa 3'
rno-miR-138-1-3p	Aldh3b1	141	-19.93	2	19	35	57	3' gggaCCACAAC-ACUUCAUCGGc 5'	| ||| | |||||:|||	5' cataGCTGTGGAGGAAGTGGCCt 3'
rno-miR-138-1-3p	Aldh6a1	151	-14.16	2	17	687	710	3' gggaccACAAC--ACUUCAUCGGc 5'	| ||| | ||||||||	5' atagacTCTTGCCTTAAGTAGCCt 3'
rno-miR-138-1-3p	Alkbh5	141	-11.08	2	10	206	227	3' gggaccacaacacUUCAUCGGc 5'	:|||||||	5' atcgctcacaccaGAGTAGCCa 3'
rno-miR-138-1-3p	Amz2	173	-26.86	2	21	195	216	3' ggGACCACAACACU-UCAUCGGc 5'	||||| |||||: |||||||	5' agCTGGT-TTGTGGCAGTAGCCc 3'
rno-miR-138-1-3p	Amz2	158	-17.19	2	19	983	1004	3' gggaCCACAACACUUCAUCGGc 5'	||| | | ||||||||	5' acagGGTCTCTTTAAGTAGCCc 3'
rno-miR-138-1-3p	Anapc11	141	-17.1	2	15	788	813	3' gggaccacAACACU----UCAUCGGc 5'	||| || |||||||	5' atcagccaTTGGGAAAACAGTAGCCc 3'
rno-miR-138-1-3p	Angpt2	153	-19.37	2	14	579	600	3' gggaccacaACACUUCAUCGGc 5'	| ||:|||||||	5' gcctacatcTCTGGAGTAGCCa 3'
rno-miR-138-1-3p	Angpt2	141	-10.76	2	14	62	83	3' gggaccacaACACUUCAUCGGc 5'	|| |||||||	5' agacaccaaTGCACAGTAGCCc 3'
rno-miR-138-1-3p	Ank1	148	-11.84	2	17	1	18	3' gggaccACAACACUUCAUCGGc 5'	| | | ||||||||	5' ----ccTCTCCTCAAGTAGCCc 3'
rno-miR-138-1-3p	Ank1	144	-24.03	2	18	1178	1200	3' gggacCACAACAC-UUCAUCGGc 5'	||| ||| ||||:|||	5' ttgaaGTGCAGTGCAAGTGGCCg 3'
rno-miR-138-1-3p	Ank2	143	-20.99	2	21	231	253	3' ggGACCACA-ACACUUCAUCGGc 5'	| || || ||||||:|||	5' caCAGGAGTGACTGAAGTGGCCt 3'
rno-miR-138-1-3p	Ankib1	151	-13.02	2	21	2466	2488	3' ggGACCACAACACU-UCAUCGGc 5'	|| | || | | |||||||	5' gcCTAATATTTTTACAGTAGCCa 3'
rno-miR-138-1-3p	Ankrd16	140	-16.86	2	17	67	88	3' gggaccACAACACUUCAUCGGc 5'	||| || ||||||:	5' gatcaaTGTGCTGCAGTAGCTg 3'
rno-miR-138-1-3p	Ankrd5	144	-11.25	2	13	1	16	3' gggaccacaaCACUUCAUCGGc 5'	|| |||||||	5' ------gtcaGTACAGTAGCCt 3'
rno-miR-138-1-3p	Ankrd57	142	-13.11	3	21	510	530	3' ggGACCACAACACUUCAUCGgc 5'	|| | |||| |||||||	5' gaCTTATATTGT-AAGTAGCag 3'
rno-miR-138-1-3p	Ankrd6	140	-21.17	2	9	269	290	3' gggaccacaacacuUCAUCGGc 5'	|||||||	5' aactctgggaacccAGTAGCCa 3'
rno-miR-138-1-3p	Ano10	143	-31.09	2	21	12	34	3' ggGACCACA-ACACUUCAUCGGc 5'	|||| | ||||||||:||:	5' cgCTGGGCTGTGTGAAGTGGCTg 3'
rno-miR-138-1-3p	Anxa2	141	-21.25	2	20	9	35	3' gggACCAC--AAC---ACUUCAUCGGc 5'	||||| ||| |||||:|||	5' gcaTGGTGGATTGCCCAGAAGTGGCCc 3'
rno-miR-138-1-3p	Aoc3	167	-24.74	2	21	630	652	3' ggGACCACA-ACACUUCAUCGGc 5'	|||| | |||| |||||||	5' ctCTGGCCTCTGTGCAGTAGCCt 3'
rno-miR-138-1-3p	Aox4	152	-12.82	2	21	30	51	3' ggGACCACAACACUUCAUCGGc 5'	| | || | ||||||||	5' taCAGCTGATTCAAAGTAGCCc 3'
rno-miR-138-1-3p	Aox4	147	-20.68	2	21	282	307	3' ggGACCACAACAC----UUCAUCGGc 5'	|| ||||| || |||||||:	5' tcCTTGTGTTTTGTTTCAAGTAGCTa 3'
rno-miR-138-1-3p	Ap3m1	144	-19.27	2	21	964	985	3' ggGACCACAACACUUCAUCGGc 5'	||| |||| | ||||||::	5' tgCTGTTGTTCTTAAGTAGTTg 3'
rno-miR-138-1-3p	Apc2	155	-25.96	2	20	906	927	3' gggACCACAACACUUCAUCGGc 5'	|| | |||||:||||||	5' ggaTGCAGATGTGAGGTAGCCg 3'
rno-miR-138-1-3p	Api5	150	-21.02	2	21	1219	1246	3' ggGACCACAACAC-U-----UCAUCGGc 5'	|| |||||| | | |||||||	5' gtCTTGTGTTGGGCATTTTTAGTAGCCc 3'
rno-miR-138-1-3p	Ard1b	146	-13.97	2	11	1585	1606	3' gggaccacaacaCUUCAUCGGc 5'	|:|||||||	5' ggagaaacagaaGGAGTAGCCt 3'
rno-miR-138-1-3p	Arf3	155	-19.37	2	12	2242	2263	3' gggaccacaacACUUCAUCGGc 5'	||||||||||	5' gctgagcaggcTGAAGTAGCCt 3'
rno-miR-138-1-3p	Arfgap2	142	-17.01	2	21	468	491	3' ggGACCACAA-CAC-UUCAUCGGc 5'	||| |||| || |||:|||	5' caCTGCTGTTCCTGTCAGTGGCCt 3'
rno-miR-138-1-3p	Arhgef15	150	-22.44	2	20	291	313	3' gggACCACA-ACACUUCAUCGGc 5'	|||||| ||:|||||:|	5' aaaTGGTGTCATTGGAGTAGTCt 3'
rno-miR-138-1-3p	Arhgef2	142	-25.65	2	21	492	518	3' ggGACCACAAC-AC----UUCAUCGGc 5'	:||| |||| || |:||||||	5' ccTTGGAGTTGATGGAGCAGGTAGCCa 3'
rno-miR-138-1-3p	Arhgef7	157	-20.78	2	19	120	142	3' gggaCCACAAC-ACUUCAUCGGc 5'	| ||||| |||||||||:	5' atgaGCTGTTGCTGAAGTAGCTa 3'
rno-miR-138-1-3p	Arl5b	142	-22.38	2	19	1198	1219	3' gggaCCACAACACUUCAUCGGc 5'	||||| | ||||||:	5' cttaGGTGTGCAGTAGTAGCTg 3'
rno-miR-138-1-3p	Armc2	156	-13.39	2	21	108	129	3' ggGACCACAACACUUCAUCGGc 5'	||| | || :|||||||	5' taCTGATTTTAGCGAGTAGCCt 3'
rno-miR-138-1-3p	Arnt2	165	-24.02	2	21	3676	3698	3' ggGACCACAAC--ACUUCAUCGGc 5'	|||| |||| | ||||||||	5' agCTGG-GTTGGTTCAAGTAGCCt 3'
rno-miR-138-1-3p	Arnt2	155	-18.07	2	18	2103	2123	3' gggacCACAACACUUCAUCGGc 5'	||| || ||||||||	5' ttccaGTGATG-AAAGTAGCCa 3'
rno-miR-138-1-3p	Arnt2	149	-13.13	2	14	3216	3237	3' gggaccacaACACUUCAUCGGc 5'	|| | |||||||	5' tccagccaaTGAGCAGTAGCCa 3'
rno-miR-138-1-3p	Arpp-21	142	-11.79	2	19	879	900	3' gggaCCACAACACUUCAUCGGc 5'	| | | | |||||||	5' acaaGCTCTCATTCAGTAGCCa 3'
rno-miR-138-1-3p	Asam	147	-15.72	2	12	95	116	3' gggaccacaacACUUCAUCGGc 5'	| ||||||||	5' ttcgatctcacTTAAGTAGCCg 3'
rno-miR-138-1-3p	Asb6	144	-15.4	2	17	12	33	3' gggaccACAACACUUCAUCGGc 5'	|| | ||::||||||	5' atagaaTGATCTGGGGTAGCCa 3'
rno-miR-138-1-3p	Astn1	141	-15.72	2	14	770	791	3' gggaccacaACACUUCAUCGGc 5'	| | |||||||	5' ctgcaagacTATTTAGTAGCCg 3'
rno-miR-138-1-3p	Ate1	142	-13.69	3	15	434	455	3' gggaccacAACACUUCAUCGgc 5'	|| |||||||||	5' aattacacTTATGAAGTAGCaa 3'
rno-miR-138-1-3p	Atg4b	146	-13.18	2	21	1316	1336	3' ggGACCACAACACUUCAUCGGc 5'	| | | | | ||||||||	5' taCAGCAGCTCT-AAGTAGCCc 3'
rno-miR-138-1-3p	Atl2	140	-13.56	2	14	75	97	3' gggaccacaACA-CUUCAUCGGc 5'	||| ||||||||:	5' acaatcaacTGTAGAAGTAGCTt 3'
rno-miR-138-1-3p	Atmin	141	-16.3	2	11	746	768	3' gggaccacaacaCU-UCAUCGGc 5'	|| |||||||	5' tgccacgtgacaGACAGTAGCCa 3'
rno-miR-138-1-3p	Atoh8	144	-21.49	2	21	790	811	3' ggGACCACAACACUUCAUCGGc 5'	||| || | | ||||||:	5' ctCTGCTGGAGGGCAGTAGCTg 3'
rno-miR-138-1-3p	Atp11a	140	-18.46	2	9	1446	1467	3' gggaccacaacacuUCAUCGGc 5'	|||||||	5' gagccccggtcctcAGTAGCCc 3'
rno-miR-138-1-3p	Atp2a2	146	-21.6	2	21	365	385	3' ggGACCACAACACUUCAUCGGc 5'	|| ||||| ||||:|||	5' gcCTTCAGTTGT-AAGTGGCCa 3'
rno-miR-138-1-3p	Atp5s	164	-24.33	2	17	810	831	3' gggaccACAACACUUCAUCGGc 5'	||| ||||||||||	5' ctttaaTGTCTTGAAGTAGCCg 3'
rno-miR-138-1-3p	Atp6v0c	140	-21.16	2	18	339	361	3' gggacCACA-ACACUUCAUCGGc 5'	|||| ||||:|| ||||	5' ttcatGTGTCTGTGGAGCAGCCc 3'
rno-miR-138-1-3p	Atp6v1b1	145	-11.95	2	10	393	414	3' gggaccacaacacUUCAUCGGc 5'	||||||||	5' gttagtcaggactAAGTAGCCa 3'
rno-miR-138-1-3p	Atp6v1g1	153	-13.75	2	16	363	383	3' gggaccaCAACACUUCAUCGGc 5'	|| || ||||||||	5' tgaaaaaGTAGT-AAGTAGCCa 3'
rno-miR-138-1-3p	Atrn	154	-24.63	2	21	2557	2577	3' ggGACCACAACACUUCAUCGGc 5'	|||||| ||| :||||||	5' tgCTGGTG-TGTTCGGTAGCCt 3'
rno-miR-138-1-3p	Aurka	155	-23.54	3	21	885	907	3' ggGACCACAAC-ACUUCAUCGgc 5'	|||| ||| |||||||||	5' aaCTGGCTTTGTTGAAGTAGCaa 3'
rno-miR-138-1-3p	B3galt5	147	-15.14	2	14	945	965	3' gggaccacaACACUUCAUCGGc 5'	|| |:|||||||	5' tacagagcaTG-GGAGTAGCCc 3'
rno-miR-138-1-3p	B3gnt2	141	-11.01	2	10	629	650	3' gggaccacaacacUUCAUCGGc 5'	:|||||||	5' ccaactaaagactGAGTAGCCt 3'
rno-miR-138-1-3p	Bahd1	142	-13.41	2	11	554	575	3' gggaccacaacaCUUCAUCGGc 5'	| |||||||	5' tcctttaccaccGCAGTAGCCa 3'
rno-miR-138-1-3p	Bbs1	152	-16.83	2	17	553	574	3' gggaccACAACACUUCAUCGGc 5'	||| | :|||||||	5' gggctcTGTCTTAGAGTAGCCa 3'
rno-miR-138-1-3p	Bbs1	141	-15.92	2	14	834	855	3' gggaccacaACACUUCAUCGGc 5'	|||| |||:|||	5' catgtttacTGTGCAGTGGCCa 3'
rno-miR-138-1-3p	Bcl11a	160	-15.13	2	18	81	103	3' gggacCACAACACU-UCAUCGGc 5'	|| || ||| |||||||	5' gtgatGTTTTCTGACAGTAGCCt 3'
rno-miR-138-1-3p	Bcl11a	160	-15.13	2	18	71	93	3' gggacCACAACACU-UCAUCGGc 5'	|| || ||| |||||||	5' gtgatGTTTTCTGACAGTAGCCt 3'
rno-miR-138-1-3p	Bcl2l10	168	-18.4	2	21	290	311	3' ggGACCACAACACUUCAUCGGc 5'	| | || ||| ||||||||	5' ctCAGCTGCTGTTAAGTAGCCa 3'
rno-miR-138-1-3p	Bclaf1	141	-12.59	2	17	93	114	3' gggaccACAACAC-UUCAUCGGc 5'	|||| || ||||||:|	5' atgtacTGTT-TGCAAGTAGTCt 3'
rno-miR-138-1-3p	Bend5	141	-10.61	2	10	279	300	3' gggaccacaacacUUCAUCGGc 5'	:|||||||	5' ctgtaaagcatcaGAGTAGCCt 3'
rno-miR-138-1-3p	Bhlhe40	152	-25.71	2	21	515	536	3' ggGACCACAACACUUCAUCGGc 5'	|| || ||||:||||||	5' tgCTAAGGTGGTGAGGTAGCCa 3'
rno-miR-138-1-3p	Birc6	150	-20.36	2	20	812	837	3' gggACCACAAC----ACUUCAUCGGc 5'	|||| ||| ||||||||:|	5' gtgTGGTTTTGTTCCTGAAGTAGTCa 3'
rno-miR-138-1-3p	Bmx	150	-17.53	2	21	814	837	3' ggGACCACA-ACAC-UUCAUCGGc 5'	||| | | || ||||||||	5' gtCTGCCATGTCTGCAAGTAGCCt 3'
rno-miR-138-1-3p	Bpgm	142	-11.18	2	11	200	221	3' gggaccacaacaCUUCAUCGGc 5'	| |||||||	5' taacattgcaaaGTAGTAGCCa 3'
rno-miR-138-1-3p	Brms1l	144	-21.6	3	21	954	975	3' ggGACCACAACACUUCAUCGgc 5'	:||||||| ||||||	5' atTTGGTGTTTATTAGTAGCat 3'
rno-miR-138-1-3p	Btg1	155	-13.45	2	18	182	202	3' gggacCACAACACUUCAUCGGc 5'	||| | | ||||||||	5' tttaaGTGAT-TTAAGTAGCCt 3'
rno-miR-138-1-3p	C20orf165	145	-13.52	2	10	625	646	3' gggaccacaacacUUCAUCGGc 5'	||||||||	5' ggcagccccaccaAAGTAGCCt 3'
rno-miR-138-1-3p	Cacna1b	141	-19.02	2	20	984	1004	3' gggACCACAACACUUCAUCGGc 5'	||| ||| ||||| ||||	5' tgaTGG-GTTCTGAAGAAGCCa 3'
rno-miR-138-1-3p	Cacna1s	145	-21.01	2	21	187	208	3' ggGAC-CACAACACUUCAUCGGc 5'	||| || || |||||||	5' agCTGCATGGACTG-AGTAGCCg 3'
rno-miR-138-1-3p	Cacna1s	140	-15.14	2	9	166	187	3' gggaccacaacacuUCAUCGGc 5'	|||||||	5' tcccctccctcctcAGTAGCCa 3'
rno-miR-138-1-3p	Capn6	140	-10.08	2	9	432	453	3' gggaccacaacacuUCAUCGGc 5'	|||||||	5' agcaacatttcaccAGTAGCCa 3'
rno-miR-138-1-3p	Car7	142	-18.14	2	21	157	177	3' ggGACCACAACACUUCAUCGGc 5'	|| | || | |::||||||	5' ctCTTGAGTAG-GGGGTAGCCt 3'
rno-miR-138-1-3p	Carhsp1	144	-15.33	2	21	617	638	3' ggGACCACAACACUUCAUCGGc 5'	||| | | |||||||	5' ctCTGCCCTAGCATAGTAGCCt 3'
rno-miR-138-1-3p	Carkd	140	-19.03	2	20	51	76	3' gggACC-ACAA-C--ACUUCAUCGGc 5'	||| | || | |||||||||:	5' tgaTGGATTTTAGCCTGAAGTAGCTg 3'
rno-miR-138-1-3p	Casc5	145	-11.34	2	10	1414	1435	3' gggaccacaacacUUCAUCGGc 5'	||||||||	5' agaaagtaagccaAAGTAGCCa 3'
rno-miR-138-1-3p	Catsper3	148	-17.05	2	19	224	249	3' gggaCCA-CAACACU---UCAUCGGc 5'	||| | || || |||||||	5' tagaGGTAGCTGGGAACGAGTAGCCt 3'
rno-miR-138-1-3p	Cbx1	145	-16.75	2	10	665	686	3' gggaccacaacacUUCAUCGGc 5'	||||||||	5' caacctgagctcaAAGTAGCCc 3'
rno-miR-138-1-3p	Ccdc106	146	-18.84	2	11	165	186	3' gggaccacaacaCUUCAUCGGc 5'	|:|||||||	5' cctccctagccaGGAGTAGCCc 3'
rno-miR-138-1-3p	Ccdc117	146	-20.27	2	21	134	154	3' ggGACCACAACACUUCAUCGGc 5'	||| ||||| :||||||	5' gaCTGTCATTGTG-GGTAGCCa 3'
rno-miR-138-1-3p	Ccdc21	142	-12.43	2	15	2194	2215	3' gggaccacAACACUUCAUCGGc 5'	|| :|||||||	5' ggcttaccTTTCAGAGTAGCCa 3'
rno-miR-138-1-3p	Ccdc8	140	-12.8	2	9	546	567	3' gggaccacaacacuUCAUCGGc 5'	|||||||	5' cgtgcccatcttccAGTAGCCc 3'
rno-miR-138-1-3p	Ccdc96	148	-13.84	2	17	225	246	3' gggaccACAACACUUCAUCGGc 5'	| | | ||||||||	5' agccttTATAGCCAAGTAGCCc 3'
rno-miR-138-1-3p	Ccdc97	150	-16.88	2	11	1443	1464	3' gggaccacaacaCUUCAUCGGc 5'	|||||||||	5' ggaaagggcccaGAAGTAGCCa 3'
rno-miR-138-1-3p	Ccl3	159	-17.09	2	21	104	126	3' ggGAC-CACAACACUUCAUCGGc 5'	||| || || ||||||||	5' agCTGTTTGCTGCCAAGTAGCCa 3'
rno-miR-138-1-3p	Ccl9	140	-17.05	2	14	631	653	3' gggaccacaACACU-UCAUCGGc 5'	||||| |||:|||	5' tggataaacTGTGAGAGTGGCCc 3'
rno-miR-138-1-3p	Ccnt2	163	-17.28	2	18	2672	2692	3' gggacCACAACACUUCAUCGGc 5'	|| |||| ||||||||	5' tgcgaGTCTTGT-AAGTAGCCa 3'
rno-miR-138-1-3p	Ccpg1	142	-23.66	2	21	413	431	3' ggGACCACAACACUUCAUCGGc 5'	|||| ||| || ||||||:	5' ggCTGG-GTT-TG-AGTAGCTg 3'
rno-miR-138-1-3p	Ccr9	158	-29.05	2	21	787	810	3' ggGA-CCACAACAC-UUCAUCGGc 5'	|| ||||| ||| ||||:|||	5' tcCTGGGTGTGGTGAAAGTGGCCc 3'
rno-miR-138-1-3p	Cd164	143	-18.19	2	21	973	997	3' ggGACCACA---ACACUUCAUCGGc 5'	| ||| | || ||||||||:	5' acCAGGTTTTCCTGAGAAGTAGCTt 3'
rno-miR-138-1-3p	Cd38	146	-13	2	12	816	838	3' gggaccacaacACU-UCAUCGGc 5'	||| |||||||	5' tattgccaaatTGATAGTAGCCt 3'
rno-miR-138-1-3p	Cdc42se2	145	-27.34	2	21	1013	1034	3' ggGACCACAACAC-UUCAUCGGc 5'	||| || ||| |||||||:	5' ccCTGCTG-AGTGTAAGTAGCTg 3'
rno-miR-138-1-3p	Cdipt	162	-23.65	2	21	767	787	3' ggGACCACAACACUUCAUCGGc 5'	|||| | || ||||||||	5' gcCTGGAG-TGAAAAGTAGCCt 3'
rno-miR-138-1-3p	Cebpg	141	-13.23	2	11	691	713	3' gggaccacaacaCU-UCAUCGGc 5'	|| |||||||	5' tgtatcctaaaaGACAGTAGCCa 3'
rno-miR-138-1-3p	Cenpa	144	-19.32	2	21	80	101	3' ggGACCACAACACUUCAUCGGc 5'	||||| ||| | |||:||:	5' tgCTGGTTTTGAGCAGTGGCTa 3'
rno-miR-138-1-3p	Chkb	147	-22.15	2	17	104	126	3' gggaccACAAC-ACUUCAUCGGc 5'	||| | |||||||||:	5' tgagacTGTCGTTGAAGTAGCTg 3'
rno-miR-138-1-3p	Chrm4	143	-13.96	2	14	838	858	3' gggaccacaACACUUCAUCGGc 5'	|| | |||||||	5' attccagacTG-GCAGTAGCCt 3'
rno-miR-138-1-3p	Cisd2	140	-10.08	2	9	1	9	3' gggaccacaacacuUCAUCGGc 5'	|||||||	5' -------------cAGTAGCCa 3'
rno-miR-138-1-3p	Cish	145	-14.56	2	14	373	394	3' gggaccacaACACUUCAUCGGc 5'	| | :|||||||	5' ctacccatcTATAGAGTAGCCa 3'
rno-miR-138-1-3p	Clca2	156	-14.05	2	17	428	449	3' gggaccACAACACUUCAUCGGc 5'	|||| ||||||||	5' ggaaaaTGTTCAAAAGTAGCCa 3'
rno-miR-138-1-3p	Cldn12	152	-14.97	2	13	1074	1095	3' gggaccacaaCACUUCAUCGGc 5'	| |||||||||	5' acacaaacagGAGAAGTAGCCa 3'
rno-miR-138-1-3p	Cldn5	160	-19.82	2	13	277	298	3' gggaccacaaCACUUCAUCGGc 5'	|||||||||||	5' gatttcatcgGTGAAGTAGCCa 3'
rno-miR-138-1-3p	Clip2	142	-25.85	2	21	1215	1238	3' ggGACCA-CAACAC-UUCAUCGGc 5'	||||| | |||| ||| ||||	5' acCTGGTAGGTGTGCAAGAAGCCa 3'
rno-miR-138-1-3p	Clp1	147	-19.02	2	13	129	151	3' gggaccacaaCACU-UCAUCGGc 5'	|||: |||||||	5' tcttgaaacaGTGGCAGTAGCCa 3'
rno-miR-138-1-3p	Clta	140	-14.78	2	9	196	217	3' gggaccacaacacuUCAUCGGc 5'	|||||||	5' ggggagctcccaacAGTAGCCt 3'
rno-miR-138-1-3p	Cndp2	150	-17.34	2	11	267	288	3' gggaccacaacaCUUCAUCGGc 5'	|||||||||	5' cttcacctccagGAAGTAGCCa 3'
rno-miR-138-1-3p	Cnih	143	-17.33	2	17	70	93	3' gggaccACAACACU--UCAUCGGc 5'	|||| | |||||||	5' aggtccTGTTTCCAAGAGTAGCCt 3'
rno-miR-138-1-3p	Cnih4	151	-20.28	2	12	1	14	3' gggaccacaacACUUCAUCGGc 5'	||:|||||||	5' --------agcTGGAGTAGCCg 3'
rno-miR-138-1-3p	Cnksr2	140	-16.61	2	9	328	349	3' gggaccacaacacuUCAUCGGc 5'	|||||||	5' tcaagatggaccacAGTAGCCg 3'
rno-miR-138-1-3p	Cnot6l	142	-15.93	2	17	2572	2592	3' gggaccACAACACUUCAUCGGc 5'	||||| | ||||||:	5' cgtaaaTGTTG-GTAGTAGCTc 3'
rno-miR-138-1-3p	Cobl	144	-15.66	2	21	827	848	3' ggGACCACAACACUUCAUCGGc 5'	| || || |||||||	5' ccCAGGACTTCACCAGTAGCCt 3'
rno-miR-138-1-3p	Commd2	146	-20.3	2	21	1107	1127	3' ggGACCACAACACUUCAUCGGc 5'	|||| ||| |:||||||	5' caCTGG-GTTTAAAGGTAGCCt 3'
rno-miR-138-1-3p	Cox16	151	-21.08	2	21	22	46	3' ggGACCACAA---CACUUCAUCGGc 5'	||||| || ||||||||:|	5' ttCTGGTTTTTCAATGAAGTAGTCt 3'
rno-miR-138-1-3p	Cpne5	156	-24.31	2	17	1754	1775	3' gggaccACAACACUUCAUCGGc 5'	|| | |||||||||	5' ctgctcTGGAGAGAAGTAGCCa 3'
rno-miR-138-1-3p	Cpne5	147	-15.97	2	21	1321	1344	3' ggGACCACAACA--CUUCAUCGGc 5'	|| ||| ||| |||||||:	5' caCTAGTGCTGTCACAAGTAGCTt 3'
rno-miR-138-1-3p	Cpne8	142	-23.86	2	21	1072	1095	3' ggGAC-CACA-ACACUUCAUCGGc 5'	||| ||| |||||| |||||	5' acCTGCCTGTGTGTGAAATAGCCc 3'
rno-miR-138-1-3p	Cpsf7	146	-20.99	2	21	1290	1313	3' ggGACCACAAC-A-CUUCAUCGGc 5'	:|| | ||| | ||:||||||	5' ggTTGCTCTTGATGGAGGTAGCCa 3'
rno-miR-138-1-3p	Cpt1a	152	-20.47	2	21	1614	1636	3' ggGACCACAA-CACU-UCAUCGGc 5'	|| ||||| | | |||||||	5' acCT-GTGTTACTCAGAGTAGCCc 3'
rno-miR-138-1-3p	Crebl2	153	-21.5	2	20	2007	2030	3' gggAC-CACA-ACACUUCAUCGGc 5'	|| |||| || |||||||	5' gggTGTGTGTACTTGTAGTAGCCa 3'
rno-miR-138-1-3p	Crispld1	141	-13.85	2	18	1980	2001	3' gggacCACAACACUUCAUCGGc 5'	|||| | ::||||||	5' aaaatGTGTCTTTGGGTAGCCc 3'
rno-miR-138-1-3p	Crtc3	152	-23.7	2	21	15	36	3' ggGACCACAACACUUCAUCGGc 5'	|||| | ||||||:|||	5' aaCTGGGGAACTGAAGTGGCCa 3'
rno-miR-138-1-3p	Csde1	155	-16.33	2	21	866	889	3' ggGACCACAACA--CUUCAUCGGc 5'	||| | || | ||||||||	5' tcCTGTTTTTTTTATAAGTAGCCc 3'
rno-miR-138-1-3p	Csrp2bp	149	-19.01	2	14	620	641	3' gggaccacaACACUUCAUCGGc 5'	|| ||||||||	5' ggcatggccTGGAAAGTAGCCc 3'
rno-miR-138-1-3p	Ctnna2	140	-11.92	2	9	177	198	3' gggaccacaacacuUCAUCGGc 5'	|||||||	5' gctactgctccatcAGTAGCCt 3'
rno-miR-138-1-3p	Ctnnbip1	140	-9.6	2	9	1304	1325	3' gggaccacaacacuUCAUCGGc 5'	|||||||	5' ctagactttcacacAGTAGCCc 3'
rno-miR-138-1-3p	Cttn	140	-18.13	2	18	373	395	3' gggacCAC-AACACUUCAUCGGc 5'	||| | ||:|||:|||	5' agacaGTGCTCCTGGAGTGGCCa 3'
rno-miR-138-1-3p	Cxcl12	147	-26.35	2	21	1983	2005	3' ggGACCACAACA-CUUCAUCGGc 5'	|||||| ||| |:|| ||||	5' ttCTGGTGGTGTGGGAGCAGCCa 3'
rno-miR-138-1-3p	Cxcl16	154	-18.38	2	20	97	123	3' gggACCACAACAC-----UUCAUCGGc 5'	|| |||| || ||||||||	5' tggTGATGTTTTGAATCAAAGTAGCCa 3'
rno-miR-138-1-3p	Cyp11b1	151	-21.31	2	21	761	783	3' ggGACCACAACAC-UUCAUCGGc 5'	|| | ||||| ||||:|||	5' ctCTTGACTTGTGAAAGTGGCCc 3'
rno-miR-138-1-3p	Cyp11b2	151	-21.31	2	21	747	769	3' ggGACCACAACAC-UUCAUCGGc 5'	|| | ||||| ||||:|||	5' ctCTTGACTTGTGAAAGTGGCCc 3'
rno-miR-138-1-3p	Cyp1a1	146	-17.31	2	11	311	332	3' gggaccacaacaCUUCAUCGGc 5'	|:|||||||	5' ctttgacaaccgGGAGTAGCCc 3'
rno-miR-138-1-3p	Cyp4a1	142	-22.3	2	21	52	72	3' ggGACCACAACACUUCAUCGGc 5'	:||||| |||| | |||||	5' agTTGGTGGTGTG-ACTAGCCt 3'
rno-miR-138-1-3p	Cyp4a10	142	-22.3	2	21	52	72	3' ggGACCACAACACUUCAUCGGc 5'	:||||| |||| | |||||	5' agTTGGTGGTGTG-ACTAGCCt 3'
rno-miR-138-1-3p	Cys1	142	-17.47	2	15	223	244	3' gggaccacAACACUUCAUCGGc 5'	||| |::||||||	5' ctcttactTTGAGGGGTAGCCt 3'
rno-miR-138-1-3p	Cytip	140	-11.59	2	9	456	477	3' gggaccacaacacuUCAUCGGc 5'	|||||||	5' tggttaatttactcAGTAGCCt 3'
rno-miR-138-1-3p	Daam1	158	-26.26	2	21	2174	2197	3' ggGACCAC-AACAC-UUCAUCGGc 5'	|||||| | ||| ||||||:|	5' gaCTGGTGCTGGTGTAAGTAGTCa 3'
rno-miR-138-1-3p	Dcaf5	147	-25.86	2	16	962	983	3' gggaccaCAACACUUCAUCGGc 5'	| ||||:|||||:|	5' tccctcaGGTGTGGAGTAGTCa 3'
rno-miR-138-1-3p	Dcaf5	145	-10.64	2	10	18	39	3' gggaccacaacacUUCAUCGGc 5'	||||||||	5' caaaagctacaaaAAGTAGCCt 3'
rno-miR-138-1-3p	Dcdc2	155	-21.34	3	21	3591	3613	3' ggGACCACAACA-CUUCAUCGgc 5'	||| |||||| |||||||	5' taCTGTTGTTGTCAAAGTAGCaa 3'
rno-miR-138-1-3p	Ddn	144	-20.73	2	21	735	756	3' ggGACCACAACACUUCAUCGGc 5'	|||| | | |:||||||	5' agCTGGAGAGGGAAGGTAGCCa 3'
rno-miR-138-1-3p	Ddx19b	161	-23.73	2	21	362	383	3' ggGACCACAACAC-UUCAUCGGc 5'	| || | |||| ||||||||	5' gcCAGGCG-TGTGCAAGTAGCCa 3'
rno-miR-138-1-3p	Ddx54	152	-23.41	2	21	15	36	3' ggGACCACAACACUUCAUCGGc 5'	|||| | | |||||||	5' ccCTGGGGCTTCCTAGTAGCCc 3'
rno-miR-138-1-3p	Depdc5	141	-19.42	3	21	1558	1580	3' ggGACCAC--AACACUUCAUCGgc 5'	||| || ||| |:||||||	5' caCTGCTGCCTTG-GGAGTAGCgc 3'
rno-miR-138-1-3p	Dgat2l6	145	-14.53	2	10	144	165	3' gggaccacaacacUUCAUCGGc 5'	||||||||	5' tgaatccccacccAAGTAGCCa 3'
rno-miR-138-1-3p	Dgkb	142	-10.59	2	11	726	747	3' gggaccacaacaCUUCAUCGGc 5'	| |||||||	5' tgcataatcacaGTAGTAGCCa 3'
rno-miR-138-1-3p	Disp2	145	-13.79	2	10	1991	2012	3' gggaccacaacacUUCAUCGGc 5'	||||||||	5' tacctcccaccccAAGTAGCCc 3'
rno-miR-138-1-3p	Dlx4	140	-21.9	2	13	786	807	3' gggaccacaaCACUUCAUCGGc 5'	|||::||||||	5' agctgcaaagGTGGGGTAGCCt 3'
rno-miR-138-1-3p	Dmtf1	145	-12.92	2	10	928	949	3' gggaccacaacacUUCAUCGGc 5'	||||||||	5' aaggtaaagccaaAAGTAGCCt 3'
rno-miR-138-1-3p	Dmwd	140	-16.69	2	20	150	169	3' gggACCACAACACUUCAUCGGc 5'	||| | ||| |||:|||	5' ccaTGGGGATGT--AGTGGCCt 3'
rno-miR-138-1-3p	Dnajb1	145	-24.39	2	21	141	166	3' ggGACC-ACA--ACACU-UCAUCGGc 5'	|||| ||| |||| |||:|||	5' ttCTGGCTGTCACGTGACAGTGGCCc 3'
rno-miR-138-1-3p	Dnajb12	140	-24.6	2	17	1467	1488	3' gggaccACAACACUUCAUCGGc 5'	|| ||||||:|||	5' ccacccTGCAATGAAGTGGCCa 3'
rno-miR-138-1-3p	Dnajc27	140	-14.12	2	9	445	466	3' gggaccacaacacuUCAUCGGc 5'	|||||||	5' cagcctacatagttAGTAGCCa 3'
rno-miR-138-1-3p	Dnajc27	140	-12.06	2	9	1584	1605	3' gggaccacaacacuUCAUCGGc 5'	|||||||	5' tctcctttctccacAGTAGCCt 3'
rno-miR-138-1-3p	Dnajc8	143	-14.55	2	12	78	99	3' gggaccacaacACUUCAUCGGc 5'	| :|||||||	5' ctcccccaacaTAGAGTAGCCa 3'
rno-miR-138-1-3p	Dnali1	140	-13.31	2	9	792	813	3' gggaccacaacacuUCAUCGGc 5'	|||||||	5' ggcctcaagtccacAGTAGCCc 3'
rno-miR-138-1-3p	Dnm3	146	-14.43	2	15	96	117	3' gggaccacAACACUUCAUCGGc 5'	| | ||||||||	5' gacctccaTAGGCAAGTAGCCa 3'
rno-miR-138-1-3p	Dnmt3b	157	-21.71	2	21	202	223	3' ggGACC-ACAACACUUCAUCGGc 5'	|||| || | | :|||||||	5' acCTGGCTGCT-TAGAGTAGCCt 3'
rno-miR-138-1-3p	Dnmt3b	140	-21.19	2	13	710	731	3' gggaccacaaCACUUCAUCGGc 5'	|||:|||:|||	5' ggaaggatggGTGGAGTGGCCt 3'
rno-miR-138-1-3p	Dock6	156	-21.02	2	15	473	493	3' gggaccacAACACUUCAUCGGc 5'	||| |||||||||	5' agggtcccTTG-GAAGTAGCCc 3'
rno-miR-138-1-3p	Dock8	140	-19.44	2	21	157	178	3' ggGACCACAACACUUCAUCGGc 5'	||| | || :|||:|||	5' agCTGTTTCTGCCGAGTGGCCg 3'
rno-miR-138-1-3p	Dohh	145	-12.9	2	10	155	176	3' gggaccacaacacUUCAUCGGc 5'	||||||||	5' tagattagggagcAAGTAGCCa 3'
rno-miR-138-1-3p	Dpp8	140	-16.05	2	17	2620	2641	3' gggaccACAACACUUCAUCGGc 5'	|| |||||||||:	5' taggcaTGACATGAAGTAGCTc 3'
rno-miR-138-1-3p	Dpyd	141	-18.38	2	14	194	215	3' gggaccacaACACUUCAUCGGc 5'	| |||||||||:	5' taattcttcTCTGAAGTAGCTg 3'
rno-miR-138-1-3p	Dstyk	145	-10.63	2	10	3061	3082	3' gggaccacaacacUUCAUCGGc 5'	||||||||	5' catcagagacaccAAGTAGCCc 3'
rno-miR-138-1-3p	Duox1	149	-17.81	2	19	379	402	3' gggaCCACAAC--ACUUCAUCGGc 5'	|| | || | :|||||||	5' gttgGGAGATGTCTAGAGTAGCCa 3'
rno-miR-138-1-3p	Ecop	141	-19.34	2	14	347	368	3' gggaccacaACACUUCAUCGGc 5'	|||| ||||||:	5' agactcacaTGTGCAGTAGCTg 3'
rno-miR-138-1-3p	Ednra	148	-24.62	2	21	2970	2989	3' ggGACCACAACACUUCAUCGGc 5'	|| |||||| | |||:|||	5' gcCT-GTGTTG-GCAGTGGCCc 3'
rno-miR-138-1-3p	Ehd1	140	-11.37	2	9	1188	1209	3' gggaccacaacacuUCAUCGGc 5'	|||||||	5' tttagccatcccacAGTAGCCt 3'
rno-miR-138-1-3p	Ehhadh	142	-10.92	2	15	553	574	3' gggaccacAACACUUCAUCGGc 5'	| | :|||||||	5' ggacaacaTAGATGAGTAGCCc 3'
rno-miR-138-1-3p	Eif1ad	140	-11.32	2	9	980	1001	3' gggaccacaacacuUCAUCGGc 5'	|||||||	5' ttcaaatatccttcAGTAGCCc 3'
rno-miR-138-1-3p	Eif1ay	152	-17.33	2	21	2069	2090	3' ggGACCACAACACUUCAUCGGc 5'	||| ||| |||||||	5' atCTGCCATTGAATAGTAGCCa 3'
rno-miR-138-1-3p	Eif5a2	156	-18.94	2	21	1682	1701	3' ggGACCACAACACUUCAUCGGc 5'	|||| | || ||||||||	5' ggCTGG-CTAGT-AAGTAGCCa 3'
rno-miR-138-1-3p	Elk4	152	-16.83	2	14	4778	4801	3' gggaccacaACAC--UUCAUCGGc 5'	|||| ||||||||	5' tgtgacaaaTGTGACAAGTAGCCa 3'
rno-miR-138-1-3p	Elk4	146	-16.23	2	20	2458	2482	3' gggACCACAACAC---UUCAUCGGc 5'	||| | || | |||||||	5' agaTGGGGCTGGGCCTCAGTAGCCt 3'
rno-miR-138-1-3p	Elk4	140	-18.41	2	21	3701	3720	3' ggGACCACAACACUUCAUCGGc 5'	|||| || | ||||:|||	5' tgCTGG-GTAG-CAAGTGGCCt 3'
rno-miR-138-1-3p	Elmod2	159	-16.6	2	21	591	613	3' ggGACCACAACA-CUUCAUCGGc 5'	| | | ||| |||||||||	5' agCAGCTTCTGTAGAAGTAGCCc 3'
rno-miR-138-1-3p	Elmod2	151	-15.43	2	14	2918	2938	3' gggaccacaACACUUCAUCGGc 5'	|||| |||||||	5' atgttcacaTGTG-AGTAGCCt 3'
rno-miR-138-1-3p	Ep300	157	-15.75	2	14	117	138	3' gggaccacaACACUUCAUCGGc 5'	|||| |||||||	5' tgtaagaacTGTGCAGTAGCCa 3'
rno-miR-138-1-3p	Epm2aip1	148	-20.08	2	17	366	387	3' gggaccACAACACUUCAUCGGc 5'	|| | ||||||:|||	5' aacacaTGGTTTGAAGTGGCCa 3'
rno-miR-138-1-3p	Eps8	141	-10.44	2	10	894	915	3' gggaccacaacacUUCAUCGGc 5'	:|||||||	5' gcattcacaatcaGAGTAGCCc 3'
rno-miR-138-1-3p	Etv5	142	-14.93	2	15	2	23	3' gggaccacAACACUUCAUCGGc 5'	| | :|||||||	5' tctctcaaTGGCCGAGTAGCCa 3'
rno-miR-138-1-3p	Evc	143	-17.25	2	17	467	490	3' gggaccACAAC--ACUUCAUCGGc 5'	||||| | |:||||||	5' tctatcTGTTGGCTCAGGTAGCCc 3'
rno-miR-138-1-3p	Exoc6b	148	-21.85	2	21	782	803	3' ggGACCACAACACUUCAUCGGc 5'	||| || :|||||||	5' ccCTGAGGTCTCAGAGTAGCCt 3'
rno-miR-138-1-3p	Ezh1	146	-14.87	2	12	1414	1436	3' gggaccacaacACU-UCAUCGGc 5'	||| |||||||	5' cccacagctccTGACAGTAGCCt 3'
rno-miR-138-1-3p	Faah	143	-13.87	2	19	555	576	3' gggaCCACAACA-CUUCAUCGGc 5'	||| || | |||||||	5' acaaGGT-TTCTCTCAGTAGCCc 3'
rno-miR-138-1-3p	Fam102b	140	-11.61	2	9	3679	3700	3' gggaccacaacacuUCAUCGGc 5'	|||||||	5' ctgagcataacgttAGTAGCCa 3'
rno-miR-138-1-3p	Fam110c	140	-8.79	2	17	1802	1823	3' gggaccACAACACUUCAUCGGc 5'	| || || ||||||:	5' aatattTATTTTGTAGTAGCTa 3'
rno-miR-138-1-3p	Fam111a	140	-13.74	3	21	194	215	3' ggGACCACAACACUUCAUCGgc 5'	|| | ||| |||||||	5' aaCTATTTGTGTAAAGTAGCat 3'
rno-miR-138-1-3p	Fam116b	158	-20.02	2	19	249	270	3' gggaCCACAACACUUCAUCGGc 5'	|| || || |||||||	5' ggtgGGAGTGGTCTAGTAGCCt 3'
rno-miR-138-1-3p	FAM120C	141	-10.44	2	10	3395	3416	3' gggaccacaacacUUCAUCGGc 5'	:|||||||	5' atagaaagaataaGAGTAGCCc 3'
rno-miR-138-1-3p	Fam133b	151	-16.99	2	21	536	558	3' ggGACCACAACACU-UCAUCGGc 5'	|| ||| | | |||||||	5' taCTTTTGTGGACACAGTAGCCa 3'
rno-miR-138-1-3p	Fam13b1	146	-24.66	2	21	898	918	3' ggGACCACAACACUUCAUCGGc 5'	||| || | | ||||:|||	5' gcCTGCTGGT-TAAAGTGGCCg 3'
rno-miR-138-1-3p	Fam163a	141	-13.86	2	20	991	1011	3' gggACCACAACACUUCAUCGGc 5'	||| || | ||||:|||	5' caaTGGCATT-TAAAGTGGCCa 3'
rno-miR-138-1-3p	Fam169a	143	-14.23	2	14	540	560	3' gggaccacaACACUUCAUCGGc 5'	| || |||||||	5' cttcaagccTCTG-AGTAGCCt 3'
rno-miR-138-1-3p	Fam171b	143	-25.5	2	21	307	329	3' ggGAC-CACAACACUUCAUCGGc 5'	||| | |||| |||||:|	5' agCTGTGGAATGTGTAGTAGTCg 3'
rno-miR-138-1-3p	Fam19a5	147	-25.22	2	21	1079	1101	3' ggGACCAC-AACACUUCAUCGGc 5'	|||| | | ||:|||:|||	5' gcCTGGAGACTCTGGAGTGGCCa 3'
rno-miR-138-1-3p	Fam20b	143	-19.06	2	18	1349	1372	3' gggacCACA-ACACU-UCAUCGGc 5'	|||| || || ||||||:	5' ggaatGTGTCTGGGACAGTAGCTg 3'
rno-miR-138-1-3p	Fam40a	146	-11.3	2	15	257	278	3' gggaccacAACACUUCAUCGGc 5'	|| ||||||||	5' aaactcatTTCACAAGTAGCCc 3'
rno-miR-138-1-3p	Fam53b	141	-16.22	2	20	256	276	3' gggACCACAACACUUCAUCGGc 5'	||| || || :||||||	5' ttaTGGAGTGCTG-GGTAGCCa 3'
rno-miR-138-1-3p	Fam81a	140	-16.74	2	20	777	796	3' gggACCACAACACUUCAUCGGc 5'	||||| | ||||||:|	5' ggaTGGTG--GCTAAGTAGTCt 3'
rno-miR-138-1-3p	Fam98a	140	-9.42	2	9	542	563	3' gggaccacaacacuUCAUCGGc 5'	|||||||	5' cagatagcacattcAGTAGCCt 3'
rno-miR-138-1-3p	Fbxl19	149	-19.97	2	18	725	746	3' gggacCACAACACUUCAUCGGc 5'	||| || |::||||||	5' ggggaGTGGTGAGGGGTAGCCc 3'
rno-miR-138-1-3p	Fbxl22	142	-10.11	2	11	325	346	3' gggaccacaacaCUUCAUCGGc 5'	| |||||||	5' ttaaagataaaaGTAGTAGCCc 3'
rno-miR-138-1-3p	Fbxo22	142	-24.51	2	21	210	233	3' ggGACCACAA-CAC-UUCAUCGGc 5'	||| |||| ||| ||| ||||	5' ggCTGTTGTTAGTGCAAGCAGCCg 3'
rno-miR-138-1-3p	Fbxo33	146	-12.54	2	13	1319	1339	3' gggaccacaaCACUUCAUCGGc 5'	|| ||||||||	5' gcaataataaGT-AAGTAGCCa 3'
rno-miR-138-1-3p	Fbxw5	143	-19.57	2	21	391	413	3' ggGACCACAAC-ACUUCAUCGGc 5'	:|| | || ||:|||:|||	5' tcTTGCTACTGATGGAGTGGCCt 3'
rno-miR-138-1-3p	Fbxw8	143	-19.61	2	21	2630	2653	3' ggGACCAC--AACACUUCAUCGGc 5'	||| || || |:|||:|||	5' caCTGATGCCTTTGGGAGTGGCCc 3'
rno-miR-138-1-3p	Fermt2	149	-19.8	2	17	266	287	3' gggaccACAACACU-UCAUCGGc 5'	|| | ||| |||||||	5' cgtcacTGAT-TGACAGTAGCCg 3'
rno-miR-138-1-3p	Fhl1	151	-21.76	2	21	1146	1168	3' ggGACCACAACACU-UCAUCGGc 5'	|||| | ||| | :||||||	5' ctCTGGGGCTGTCAGGGTAGCCc 3'
rno-miR-138-1-3p	Fhl1	151	-21.76	2	21	1075	1097	3' ggGACCACAACACU-UCAUCGGc 5'	|||| | ||| | :||||||	5' ctCTGGGGCTGTCAGGGTAGCCc 3'
rno-miR-138-1-3p	Fibcd1	141	-11.63	2	10	2043	2064	3' gggaccacaacacUUCAUCGGc 5'	:|||||||	5' ccaaccataatcaGAGTAGCCa 3'
rno-miR-138-1-3p	Fibin	142	-13.98	2	17	330	354	3' gggaccACAACAC-U--UCAUCGGc 5'	| || || | |||||||	5' ggtgacTCTTCTGCATCAGTAGCCt 3'
rno-miR-138-1-3p	Fkbp9	154	-16.39	2	19	90	109	3' gggaCCACAACACUUCAUCGGc 5'	||| ||| | |||||||	5' ggaaGGT-TTGAG-AGTAGCCa 3'
rno-miR-138-1-3p	Fkrp	141	-15.96	2	20	1004	1024	3' gggACCACAACACUUCAUCGGc 5'	| || || |||||:|||	5' agaTAGT-TTAGGAAGTGGCCa 3'
rno-miR-138-1-3p	Flnb	140	-12.16	2	9	906	927	3' gggaccacaacacuUCAUCGGc 5'	|||||||	5' agggatacaggcttAGTAGCCa 3'
rno-miR-138-1-3p	Flot2	145	-21.73	2	21	357	382	3' ggGAC-CACA-ACACU--UCAUCGGc 5'	||| ||| ||||| |||:|||	5' gtCTGTCTGTCTGTGAGGAGTGGCCc 3'
rno-miR-138-1-3p	Foxa1	154	-13.9	2	15	316	337	3' gggaccacAACACUUCAUCGGc 5'	||| ||||||||	5' cagcagcaTTGGAAAGTAGCCc 3'
rno-miR-138-1-3p	Foxa2	145	-16.61	2	10	84	105	3' gggaccacaacacUUCAUCGGc 5'	||||||||	5' aactttgaggaaaAAGTAGCCa 3'
rno-miR-138-1-3p	Foxe1	144	-17.51	2	21	723	744	3' ggGACCACAACACUUCAUCGGc 5'	|| | | | |||||||	5' acCTAGGGCTTCCCAGTAGCCa 3'
rno-miR-138-1-3p	Foxi1	149	-12.45	2	19	684	706	3' gggaCCACAAC-ACUUCAUCGGc 5'	||| | | | |||||||	5' atagGGTATCGCTTCAGTAGCCt 3'
rno-miR-138-1-3p	Frzb	143	-16.75	2	21	638	655	3' ggGACCACAACACUUCAUCGGc 5'	|||| || |||||||	5' caCTGGAGT----CAGTAGCCc 3'
rno-miR-138-1-3p	Fut2	153	-21.36	2	21	1293	1314	3' ggGACCAC-AACACUUCAUCGGc 5'	|| ||| | |||||||||	5' tcCT-GTGCATAAGAAGTAGCCt 3'
rno-miR-138-1-3p	G3bp1	160	-26.8	2	21	72	93	3' ggGACCACAACACUUCAUCGGc 5'	:|||||| ||:|||||:|	5' ctTTGGTGTCTTGGAGTAGTCt 3'
rno-miR-138-1-3p	G6pc	155	-21.48	2	18	464	484	3' gggacCACAACACUUCAUCGGc 5'	|||| || |||||||	5' agcccGTGTAATG-AGTAGCCa 3'
rno-miR-138-1-3p	Gabpa	151	-18.8	2	12	337	358	3' gggaccacaacACUUCAUCGGc 5'	||:|||||||	5' agaaagcagccTGGAGTAGCCa 3'
rno-miR-138-1-3p	Gad1	147	-11.85	2	17	942	964	3' gggaccACAAC-ACUUCAUCGGc 5'	| ||| | |||||||	5' tggaaaTCTTGCTTCAGTAGCCt 3'
rno-miR-138-1-3p	Gadd45g	147	-21.18	2	21	48	70	3' ggGACCA-CAACACUUCAUCGGc 5'	||| | | | ||:|||:|||	5' cgCTGCTGGCTCTGGAGTGGCCc 3'
rno-miR-138-1-3p	Ganc	152	-17.32	2	13	157	178	3' gggaccacaaCACUUCAUCGGc 5'	||| |||||||	5' ttttagccagGTGCAGTAGCCc 3'
rno-miR-138-1-3p	Gas2	146	-17.54	2	11	602	623	3' gggaccacaacaCUUCAUCGGc 5'	|:|||||||	5' tgcagccccttaGGAGTAGCCa 3'
rno-miR-138-1-3p	Gata2	152	-21.27	2	21	1121	1142	3' ggGACCACAACACUUCAUCGGc 5'	|| |||| || :||||||	5' ggCTTCTGTTCTGCGGTAGCCg 3'
rno-miR-138-1-3p	Gatad1	140	-18.46	2	14	1014	1036	3' gggaccacaACACU-UCAUCGGc 5'	||||| :||||||	5' agcagcctcTGTGAGGGTAGCCt 3'
rno-miR-138-1-3p	Gca	140	-10.11	2	9	1622	1643	3' gggaccacaacacuUCAUCGGc 5'	|||||||	5' atgaccatatactcAGTAGCCt 3'
rno-miR-138-1-3p	Gcgr	163	-24.4	2	21	169	191	3' ggGACC-ACAACACUUCAUCGGc 5'	|||| | | ||:|||||||	5' ggCTGGATATGATGGAGTAGCCa 3'
rno-miR-138-1-3p	Gcgr	163	-24.4	2	21	168	190	3' ggGACC-ACAACACUUCAUCGGc 5'	|||| | | ||:|||||||	5' ggCTGGATATGATGGAGTAGCCa 3'
rno-miR-138-1-3p	Gemin7	149	-15.61	2	19	21	43	3' gggaCCACAAC-ACUUCAUCGGc 5'	|| ||| | |||||||	5' tgtgGGCATTGCCGCAGTAGCCc 3'
rno-miR-138-1-3p	Gga3	167	-32.89	2	21	191	213	3' ggGAC-CACAACACUUCAUCGGc 5'	||| ||| ||||||||||	5' acCTGTGTGACTTGAAGTAGCCg 3'
rno-miR-138-1-3p	Gins2	144	-17.53	2	21	1028	1049	3' ggGACCACAACACUUCAUCGGc 5'	||| || ||| ||||:||:	5' gaCTGCTGCTGTTAAGTGGCTa 3'
rno-miR-138-1-3p	Gipr	149	-27.63	2	19	1005	1027	3' gggaCCACA-ACACUUCAUCGGc 5'	||||| |||||:||||:|	5' ctagGGTGTGTGTGAGGTAGTCt 3'
rno-miR-138-1-3p	Gipr	142	-25.11	2	21	715	738	3' ggGACCACA-ACA-CUUCAUCGGc 5'	||| || || ||:||||||	5' tcCTGTGGTCAGTGGAGGTAGCCa 3'
rno-miR-138-1-3p	Gjd2	159	-21.67	2	21	20	42	3' ggGACCA-CAACACUUCAUCGGc 5'	||| | | || ||||||||	5' gcCTGCTAGGTGGCAAGTAGCCc 3'
rno-miR-138-1-3p	Glp1r	156	-25.55	3	21	1243	1264	3' ggGACCACAACACUUCAUCGgc 5'	| ||||||| |||||||	5' caCCGGTGTTGATAAGTAGCgt 3'
rno-miR-138-1-3p	Glra2	146	-19.41	2	21	887	910	3' ggGACCACA-ACACU-UCAUCGGc 5'	:|||||| | | | ||||||:	5' gaTTGGTGTATCTCAGAGTAGCTc 3'
rno-miR-138-1-3p	Gls	155	-15.48	2	12	170	191	3' gggaccacaacACUUCAUCGGc 5'	||||||||||	5' aaaaatagaaaTGAAGTAGCCt 3'
rno-miR-138-1-3p	Gls2	145	-14.59	2	10	247	268	3' gggaccacaacacUUCAUCGGc 5'	||||||||	5' atcctccaccagaAAGTAGCCc 3'
rno-miR-138-1-3p	Glt25d1	142	-19.94	2	21	700	720	3' ggGACCACAACACUUCAUCGGc 5'	:||| |||| ||| |||||	5' agTTGG-GTTGAGAAATAGCCa 3'
rno-miR-138-1-3p	Glt8d3	142	-14.76	2	17	2361	2381	3' gggaccACAACACUUCAUCGGc 5'	| || | |||||||	5' atgcaaTTTTCT-CAGTAGCCg 3'
rno-miR-138-1-3p	Glul	143	-17.72	2	21	838	860	3' ggGACCACAA-CACUUCAUCGGc 5'	| | |||| | |:||||||	5' agCAGATGTTGGACAGGTAGCCa 3'
rno-miR-138-1-3p	Gnai2	140	-20.95	2	19	214	234	3' gggaCCACAACACUUCAUCGGc 5'	|||| | |:|||:|||	5' ctgaGGTGCCG-GGAGTGGCCa 3'
rno-miR-138-1-3p	Gnat1	140	-13.5	2	9	454	475	3' gggaccacaacacuUCAUCGGc 5'	|||||||	5' tggctgtccctcccAGTAGCCt 3'
rno-miR-138-1-3p	Gng10	145	-21.17	2	18	483	504	3' gggacCACAACACUUCAUCGGc 5'	||||||| |:||:|||	5' tggatGTGTTGTTAGGTGGCCc 3'
rno-miR-138-1-3p	Golga1	152	-15.27	2	13	1392	1413	3' gggaccacaaCACUUCAUCGGc 5'	||| |||||||	5' tactagaagaGTGCAGTAGCCa 3'
rno-miR-138-1-3p	Golga2	143	-23.82	2	21	103	125	3' ggGACCAC-AACACUUCAUCGGc 5'	| || | | | ||||||||:	5' tcCAGGGGCTGGGGAAGTAGCTc 3'
rno-miR-138-1-3p	Gosr2	140	-9.88	2	9	1155	1176	3' gggaccacaacacuUCAUCGGc 5'	|||||||	5' acagttctaaatttAGTAGCCt 3'
rno-miR-138-1-3p	Gpr174	142	-9.94	2	17	1170	1190	3' gggaccACAACACUUCAUCGGc 5'	|| | | |||||||	5' cgtacaTGAT-TCCAGTAGCCt 3'
rno-miR-138-1-3p	Gpr177	145	-21.8	2	21	516	543	3' ggGACCACAACACU-------UCAUCGGc 5'	||||| |||| | |||||||	5' tcCTGGT-TTGTAACTACATCAGTAGCCc 3'
rno-miR-138-1-3p	Gpr177	145	-11.11	2	10	455	476	3' gggaccacaacacUUCAUCGGc 5'	||||||||	5' tatttatatcaccAAGTAGCCa 3'
rno-miR-138-1-3p	Gpr45	141	-20.74	2	20	552	572	3' gggACCACAACACUUCAUCGGc 5'	||||| || |||:|||	5' tggTGGTGGCGT-TAGTGGCCc 3'
rno-miR-138-1-3p	Gpr89	170	-23.79	2	21	128	148	3' ggGACCACAACACUUCAUCGGc 5'	|||| || ||| |||||||	5' taCTGGAGTCGTG-AGTAGCCt 3'
rno-miR-138-1-3p	Grb10	149	-15.76	2	14	957	978	3' gggaccacaACACUUCAUCGGc 5'	| || |||||||	5' cctttacccTCTGCAGTAGCCt 3'
rno-miR-138-1-3p	Grhl2	144	-18.54	2	19	735	755	3' gggaCCACAACACUUCAUCGGc 5'	||| | | |||||:|||	5' gggaGGT-TAGAGAAGTGGCCt 3'
rno-miR-138-1-3p	Grhl2	141	-21.79	2	14	2107	2128	3' gggaccacaACACUUCAUCGGc 5'	| |||:||||||	5' tccctactcTATGAGGTAGCCa 3'
rno-miR-138-1-3p	Gria2	142	-10.08	2	16	1774	1796	3' gggaccaCAACACU-UCAUCGGc 5'	| | | | |||||||	5' aatgtaaGATTTAACAGTAGCCa 3'
rno-miR-138-1-3p	Grsf1	147	-21.75	2	21	776	800	3' ggGACCACAA---CACUUCAUCGGc 5'	||| | || |||::||||||	5' ctCTGCTTTTCCAGTGGGGTAGCCa 3'
rno-miR-138-1-3p	Gsk3b	145	-13.82	2	10	1	17	3' gggaccacaacacUUCAUCGGc 5'	||||||||	5' -----acagccccAAGTAGCCa 3'
rno-miR-138-1-3p	Gtf2h3	142	-26.23	3	19	152	173	3' gggaCCACAACACUUCAUCGgc 5'	| |||||||::|||||	5' gtagGTTGTTGTGGGGTAGCag 3'
rno-miR-138-1-3p	Gyg1	155	-19.69	2	17	384	406	3' gggaccACA-ACACUUCAUCGGc 5'	||| | |||||||||	5' aaagccTGTCAGAGAAGTAGCCt 3'
rno-miR-138-1-3p	Gypc	140	-14.02	2	9	1252	1273	3' gggaccacaacacuUCAUCGGc 5'	|||||||	5' cgctgtctccacctAGTAGCCa 3'
rno-miR-138-1-3p	Gzf1	147	-16.57	3	16	1042	1063	3' gggaccaCAACACUUCAUCGgc 5'	||| |||||||||	5' aaaactaGTTATGAAGTAGCaa 3'
rno-miR-138-1-3p	Gzf1	143	-20.87	2	21	3	28	3' ggGACCACAACAC----UUCAUCGGc 5'	:|| |||||| ||||||:|	5' acTTGAAGTTGTGTGCCAAGTAGTCt 3'
rno-miR-138-1-3p	H1f0	154	-18.29	2	21	809	832	3' ggGAC-CACAACA-CUUCAUCGGc 5'	:|| || || | ||||||||	5' ttTTGAGTCTTTTCTAAGTAGCCg 3'
rno-miR-138-1-3p	Hapln1	140	-8.18	2	17	734	755	3' gggaccACAACACUUCAUCGGc 5'	| || | |||||||:	5' ttttatTATTTTTAAGTAGCTt 3'
rno-miR-138-1-3p	Has1	146	-17.55	2	15	45	66	3' gggaccacAACACUUCAUCGGc 5'	|| |||:||||||	5' aggagtccTTATGAGGTAGCCc 3'
rno-miR-138-1-3p	Hbegf	154	-17.16	2	18	415	434	3' gggacCACAACACUUCAUCGGc 5'	|||| | ||||||||	5' gctaaGTGT--TCAAGTAGCCa 3'
rno-miR-138-1-3p	Hdac6	140	-13.13	2	9	218	239	3' gggaccacaacacuUCAUCGGc 5'	|||||||	5' aagagggacaacttAGTAGCCc 3'
rno-miR-138-1-3p	Hdhd3	154	-31.81	2	21	1	21	3' ggGACCACAACACUUCAUCGGc 5'	|||||| | ||||||||:	5' gtCTGGTG-AGGGAAGTAGCTg 3'
rno-miR-138-1-3p	Hebp2	141	-14.91	2	20	121	141	3' gggACCACAACACUUCAUCGGc 5'	|| |||| |||||||:	5' gtgTGCCTTTGT-AAGTAGCTt 3'
rno-miR-138-1-3p	Hip1	140	-18.07	2	9	3116	3137	3' gggaccacaacacuUCAUCGGc 5'	|||||||	5' tatgtgcatagcccAGTAGCCg 3'
rno-miR-138-1-3p	Hipk1	148	-16.5	2	21	4073	4094	3' ggGACCACAACACUUCAUCGGc 5'	:|||| || |||||||:	5' ctTTGGTTTTACAAAGTAGCTt 3'
rno-miR-138-1-3p	Hjurp	140	-12.88	2	9	135	156	3' gggaccacaacacuUCAUCGGc 5'	|||||||	5' tcactgcagctcccAGTAGCCa 3'
rno-miR-138-1-3p	Hltf	154	-22.31	2	21	1401	1421	3' ggGACCACAACACUUCAUCGGc 5'	||| || | | |||||||	5' gcCTGCTG-GGGGTAGTAGCCc 3'
rno-miR-138-1-3p	Hmbox1	147	-20.59	2	17	92	114	3' gggaccACA-ACACUUCAUCGGc 5'	||| ||| |:||||||	5' gttcctTGTATGTCAGGTAGCCa 3'
rno-miR-138-1-3p	Hmcn1	143	-14.42	3	20	282	303	3' gggACCACAACACUUCAUCGgc 5'	|| | |||| ||||||	5' cagTGATATTGTATAGTAGCat 3'
rno-miR-138-1-3p	Hmgb3	146	-24.63	2	20	139	161	3' gggACCACA-ACACUUCAUCGGc 5'	|||| | ||||||:|||	5' cagTGGTTTACATGAAGTGGCCg 3'
rno-miR-138-1-3p	Hmgn2	143	-26.66	2	21	261	283	3' ggGACCACAACAC-UUCAUCGGc 5'	||||| ||| | |:||:|||	5' tcCTGGTCTTGCGTAGGTGGCCa 3'
rno-miR-138-1-3p	Hn1	144	-15.15	2	13	211	232	3' gggaccacaaCACUUCAUCGGc 5'	| | |||||||	5' tagtagaccgGAGTAGTAGCCt 3'
rno-miR-138-1-3p	Hnf1a	141	-13.59	2	14	984	1005	3' gggaccacaACACUUCAUCGGc 5'	|||| ||||||:	5' agtaagaagTGTGTAGTAGCTt 3'
rno-miR-138-1-3p	Hnrnpa3	141	-22.95	2	19	1256	1282	3' gggaCCACAACACU-----UCAUCGGc 5'	|||| ||||| :||||||	5' gcaaGGTGCTGTGAGGATCGGTAGCCt 3'
rno-miR-138-1-3p	Hnrnpa3	141	-22.95	2	19	3868	3894	3' gggaCCACAACACU-----UCAUCGGc 5'	|||| ||||| :||||||	5' gcaaGGTGCTGTGAGGATCGGTAGCCt 3'
rno-miR-138-1-3p	Homer1	146	-17.45	2	12	275	297	3' gggaccacaacACU-UCAUCGGc 5'	||| |||||||	5' atcttttccccTGATAGTAGCCa 3'
rno-miR-138-1-3p	Hook1	140	-15.92	2	17	638	659	3' gggaccACAACACUUCAUCGGc 5'	||||||| ||| |||	5' ttagacTGTTGTGTAGTTGCCt 3'
rno-miR-138-1-3p	Hpse	140	-10.43	2	9	462	483	3' gggaccacaacacuUCAUCGGc 5'	|||||||	5' caaatacgacctccAGTAGCCt 3'
rno-miR-138-1-3p	Hrk	151	-20.92	2	21	103	127	3' ggGACCACAACACU---UCAUCGGc 5'	||| | | ||| |||||||	5' tcCTGTTTTCCTGAGGGAGTAGCCc 3'
rno-miR-138-1-3p	Hsd17b12	147	-15.82	2	21	532	555	3' ggGACCACAACA--CUUCAUCGGc 5'	||||| || | |||||||:	5' aaCTGGTCTTCTTAAAAGTAGCTa 3'
rno-miR-138-1-3p	Hsd17b13	141	-16.38	2	19	106	128	3' gggaCCACAAC-ACUUCAUCGGc 5'	||| | | |||||||	5' tgtaGGTTTGGCCCTAGTAGCCa 3'
rno-miR-138-1-3p	Hspa4l	142	-15.01	3	21	582	602	3' ggGACCACAACACUUCAUCGgc 5'	||| | |||| ||||||	5' tgCTGCTTTTGT-TAGTAGCat 3'
rno-miR-138-1-3p	Hspb1	140	-17.54	2	9	13	34	3' gggaccacaacacuUCAUCGGc 5'	|||||||	5' tgctacccatccccAGTAGCCg 3'
rno-miR-138-1-3p	Hspb9	153	-18.1	2	18	10	31	3' gggacCACAACACUUCAUCGGc 5'	| | ||| |||||||	5' caaccGAGGCGTGCAGTAGCCt 3'
rno-miR-138-1-3p	Ibsp	145	-19.69	3	19	224	246	3' gggaCCACAAC-ACUUCAUCGgc 5'	| ||||| | |||||||	5' caggGCTGTTGATCAAGTAGCac 3'
rno-miR-138-1-3p	Icmt	156	-16.12	2	21	621	642	3' ggGACCACAACACUUCAUCGGc 5'	||| | | | :|||||||	5' ctCTGCAGCTTTTGAGTAGCCa 3'
rno-miR-138-1-3p	Ids	150	-14.78	2	17	379	399	3' gggaccACAACACUUCAUCGGc 5'	|| | | ||||||||	5' accataTG-TCTTAAGTAGCCc 3'
rno-miR-138-1-3p	Ifit1lb	143	-11.79	2	16	286	307	3' gggaccaCAACACUUCAUCGGc 5'	|| | |||||||	5' accatcaGTCTTCCAGTAGCCt 3'
rno-miR-138-1-3p	Igf2	141	-13.49	2	10	1047	1068	3' gggaccacaacacUUCAUCGGc 5'	:|||||||	5' atacatgctacccGAGTAGCCt 3'
rno-miR-138-1-3p	Igfbp3	141	-22.23	2	21	595	621	3' ggGACC---ACA-ACAC-UUCAUCGGc 5'	|||| ||| | || ||||:|||	5' gcCTGGCCCTGTATCTGCAAGTGGCCt 3'
rno-miR-138-1-3p	Igsf11	159	-26.41	2	21	157	179	3' ggGACCACA-ACACUUCAUCGGc 5'	||| || ||||||||:|||	5' cgCTGCAGTGTGTGAAGTGGCCt 3'
rno-miR-138-1-3p	Ikzf5	141	-11.86	2	20	1137	1157	3' gggACCACAACACUUCAUCGGc 5'	| |||| | |||||||:	5' gtaTCGTGTAAT-AAGTAGCTt 3'
rno-miR-138-1-3p	Il1rn	145	-18.05	2	21	1122	1141	3' ggGACCACAACACUUCAUCGGc 5'	|| |||| ||||||||:	5' aaCTTGTGT--CGAAGTAGCTa 3'
rno-miR-138-1-3p	Il33	151	-11.55	2	16	1516	1537	3' gggaccaCAACACUUCAUCGGc 5'	|| | ||||||||	5' taaaataGTAATTAAGTAGCCa 3'
rno-miR-138-1-3p	Il34	150	-23.22	2	21	70	93	3' ggGACC-ACAACAC-UUCAUCGGc 5'	|||| | ||| | |:||||||	5' tcCTGGATATTGGGTAGGTAGCCc 3'
rno-miR-138-1-3p	Il9r	142	-25.8	2	15	1019	1040	3' gggaccacAACACUUCAUCGGc 5'	| |||::||||||	5' taactgccTCGTGGGGTAGCCg 3'
rno-miR-138-1-3p	Impact	140	-10.69	2	9	1296	1317	3' gggaccacaacacuUCAUCGGc 5'	|||||||	5' ttaaataggaatccAGTAGCCa 3'
rno-miR-138-1-3p	Impad1	141	-17.08	2	14	3197	3218	3' gggaccacaACACUUCAUCGGc 5'	|| ||||||||:	5' cgatataccTGCGAAGTAGCTc 3'
rno-miR-138-1-3p	Inhbb	156	-20.29	2	21	596	617	3' ggGACCACAACACUUCAUCGGc 5'	:||| | | ||||||||	5' tcTTGGAGAGGGCAAGTAGCCc 3'
rno-miR-138-1-3p	Inhbb	145	-18.89	2	18	1230	1251	3' gggacCACAACACUUCAUCGGc 5'	|||| |||||:|||	5' tacgtGTGTCCAGAAGTGGCCc 3'
rno-miR-138-1-3p	Inpp5a	156	-17.52	2	17	827	848	3' gggaccACAACACUUCAUCGGc 5'	|| || ||||||||	5' gttttaTGGTGCCAAGTAGCCt 3'
rno-miR-138-1-3p	Inpp5a	150	-16.79	2	11	868	889	3' gggaccacaacaCUUCAUCGGc 5'	|||||||||	5' gtgggagaattaGAAGTAGCCt 3'
rno-miR-138-1-3p	Inpp5f	140	-8.35	2	17	412	433	3' gggaccACAACACUUCAUCGGc 5'	| || | ||||||:|	5' aaatttTTTTTTAAAGTAGTCt 3'
rno-miR-138-1-3p	Inpp5j	143	-19.92	2	21	103	126	3' ggGACCACAAC--ACUUCAUCGGc 5'	||| | ||| |:|||:|||	5' ctCTGTTCTTGCCAGGAGTGGCCa 3'
rno-miR-138-1-3p	Inppl1	147	-17.63	2	21	186	204	3' ggGACCACAACACUUCAUCGGc 5'	| || ||| | |||||||	5' gtCAGGGGTT-T--AGTAGCCt 3'
rno-miR-138-1-3p	Ip6k2	141	-20.98	2	21	98	122	3' ggGACCACAAC-A-CU-UCAUCGGc 5'	|||| | || | || |||:|||	5' gcCTGGAGCTGATAGACAGTGGCCc 3'
rno-miR-138-1-3p	Ipo11	145	-14.42	2	18	682	703	3' gggacCACAACACUUCAUCGGc 5'	||| | |||||||	5' tacatGTGAAGGCCAGTAGCCc 3'
rno-miR-138-1-3p	Irf5	147	-11.28	2	12	52	73	3' gggaccacaacACUUCAUCGGc 5'	|| |||||||	5' tgacatagcaaTGTAGTAGCCc 3'
rno-miR-138-1-3p	Isoc1	147	-17.54	3	16	1383	1404	3' gggaccaCAACACUUCAUCGgc 5'	||| |||||||||	5' agttacgGTTATGAAGTAGCga 3'
rno-miR-138-1-3p	Isy1	140	-12.13	2	9	490	511	3' gggaccacaacacuUCAUCGGc 5'	|||||||	5' gagaaggatcaattAGTAGCCa 3'
rno-miR-138-1-3p	Itfg3	140	-14.58	2	9	805	826	3' gggaccacaacacuUCAUCGGc 5'	|||||||	5' atggggaaagtcccAGTAGCCc 3'
rno-miR-138-1-3p	Itgb5	151	-14.75	2	21	609	631	3' ggGAC-CACAACACUUCAUCGGc 5'	||| | | | | |||||||	5' ttCTGAGAGGTCTTCAGTAGCCc 3'
rno-miR-138-1-3p	Jarid1a	145	-11.19	2	10	699	720	3' gggaccacaacacUUCAUCGGc 5'	||||||||	5' cttacttcaaggcAAGTAGCCc 3'
rno-miR-138-1-3p	Jrk	140	-16.83	3	21	862	883	3' ggGACCACAACACUUCAUCGgc 5'	:|| | || |:||||||	5' ctTTGTAGCTGAGGAGTAGCac 3'
rno-miR-138-1-3p	Jub	142	-13.39	2	11	772	793	3' gggaccacaacaCUUCAUCGGc 5'	| |||||||	5' cttagttccctaGCAGTAGCCt 3'
rno-miR-138-1-3p	Jun	162	-17.27	2	15	717	738	3' gggaccacAACACUUCAUCGGc 5'	||| |||||||||	5' ataaaccaTTGAGAAGTAGCCc 3'
rno-miR-138-1-3p	Kb40	141	-16.93	2	15	14	39	3' gggaccacAACACU----UCAUCGGc 5'	|| ||| |||||||	5' cacatcccTTCTGAGCCCAGTAGCCt 3'
rno-miR-138-1-3p	Kcnh1	147	-15.25	2	12	456	477	3' gggaccacaacACUUCAUCGGc 5'	| ||||||||	5' attcaccacccTCAAGTAGCCc 3'
rno-miR-138-1-3p	Kcnj6	145	-15.94	2	10	2653	2674	3' gggaccacaacacUUCAUCGGc 5'	||||||||	5' ttttctaagcagcAAGTAGCCg 3'
rno-miR-138-1-3p	Kcnk6	163	-29.18	2	21	78	100	3' ggGA-CCACAACACUUCAUCGGc 5'	|| || | || |:|||||||	5' caCTGGGAGGTGAGGAGTAGCCg 3'
rno-miR-138-1-3p	Kcnk6	141	-11.47	2	10	389	410	3' gggaccacaacacUUCAUCGGc 5'	:|||||||	5' ccagaagaggcaaGAGTAGCCa 3'
rno-miR-138-1-3p	Kcnv1	140	-10.21	2	9	488	509	3' gggaccacaacacuUCAUCGGc 5'	|||||||	5' aaacacttaagcttAGTAGCCa 3'
rno-miR-138-1-3p	Kctd5	145	-18.89	2	18	364	385	3' gggacCACAACACUUCAUCGGc 5'	| | | | |||||||	5' caggaGGGAGGAGCAGTAGCCg 3'
rno-miR-138-1-3p	Kdm5b	148	-18.3	3	19	1406	1426	3' gggaCCACAACACUUCAUCGgc 5'	||| |||| |||||||	5' aagcGGT-TTGTAAAGTAGCga 3'
rno-miR-138-1-3p	Kdm5b	140	-10.29	2	9	374	395	3' gggaccacaacacuUCAUCGGc 5'	|||||||	5' ggcaccagaattccAGTAGCCc 3'
rno-miR-138-1-3p	Kdr	150	-21.27	2	11	84	105	3' gggaccacaacaCUUCAUCGGc 5'	|||||||||	5' ttccaccactcgGAAGTAGCCg 3'
rno-miR-138-1-3p	Kdsr	145	-18.76	2	18	456	477	3' gggacCACAACACUUCAUCGGc 5'	|||| | |:||||||	5' aaggtGTGTCTTCAGGTAGCCc 3'
rno-miR-138-1-3p	Khdrbs3	160	-26.4	2	21	8	29	3' ggGACCACAACACUUCAUCGGc 5'	||| ||||||||| |||||	5' gtCTGATGTTGTGAAATAGCCa 3'
rno-miR-138-1-3p	Kidins220	155	-12.02	2	16	407	428	3' gggaccaCAACACUUCAUCGGc 5'	||| | :|||||||	5' tttataaGTTTTAGAGTAGCCc 3'
rno-miR-138-1-3p	Kif3b	141	-19.54	3	20	1954	1977	3' gggACC-ACAACACU-UCAUCGgc 5'	||| | ||||| ||||||	5' aagTGGTTAATGTGATAGTAGCag 3'
rno-miR-138-1-3p	Kif3b	140	-14.79	2	9	2325	2346	3' gggaccacaacacuUCAUCGGc 5'	|||||||	5' aggccacagcctacAGTAGCCa 3'
rno-miR-138-1-3p	Kif3c	140	-14.86	2	9	587	608	3' gggaccacaacacuUCAUCGGc 5'	|||||||	5' tcccaaggactttcAGTAGCCt 3'
rno-miR-138-1-3p	Kit	146	-13.94	2	15	237	258	3' gggaccacAACACUUCAUCGGc 5'	| | ||||||||	5' tttcccatTAGCAAAGTAGCCc 3'
rno-miR-138-1-3p	Kit	145	-14.36	2	18	377	398	3' gggacCACAACACUUCAUCGGc 5'	| ||| |||||||:|	5' ttgaaGAGTTTAGAAGTAGTCc 3'
rno-miR-138-1-3p	Kit	140	-22.21	4	21	665	686	3' ggGACCACAACACUUCAUCggc 5'	||| ||||| |:|||||	5' gtCTGCTGTTGGGGAGTAGaat 3'
rno-miR-138-1-3p	Klf12	150	-15.7	2	11	561	582	3' gggaccacaacaCUUCAUCGGc 5'	|||||||||	5' gaaaggcacacaGAAGTAGCCc 3'
rno-miR-138-1-3p	Klf5	145	-15.32	2	10	446	467	3' gggaccacaacacUUCAUCGGc 5'	||||||||	5' ctggcaattcacaAAGTAGCCa 3'
rno-miR-138-1-3p	Klf6	143	-15.25	2	18	661	686	3' gggacCAC--AACAC--UUCAUCGGc 5'	||| ||||| |||||||:	5' agaatGTGCATTGTGTCAAGTAGCTt 3'
rno-miR-138-1-3p	Klhdc5	150	-18.55	2	17	1263	1283	3' gggaccACAACACUUCAUCGGc 5'	|| ||| |||||||	5' gccaacTGCGGTG-AGTAGCCt 3'
rno-miR-138-1-3p	Klhl26	144	-21.68	2	13	858	879	3' gggaccacaaCACUUCAUCGGc 5'	||||:||||||	5' gccacctcagGTGAGGTAGCCt 3'
rno-miR-138-1-3p	Klhl7	152	-14.31	2	13	280	301	3' gggaccacaaCACUUCAUCGGc 5'	| |||||||||	5' atgctcatcaGAGAAGTAGCCt 3'
rno-miR-138-1-3p	Ky	140	-23.7	4	17	3015	3036	3' gggaccACAACACUUCAUCggc 5'	|||||||||||||	5' atttccTGTTGTGAAGTAGgag 3'
rno-miR-138-1-3p	L3mbtl2	143	-20.36	2	21	833	855	3' ggGACCAC-AACACUUCAUCGGc 5'	|||| | ||| || ||||||	5' ttCTGGAGCTTGAGATGTAGCCc 3'
rno-miR-138-1-3p	Lamc1	152	-17.8	2	21	1742	1763	3' ggGACCACAACACUUCAUCGGc 5'	||| | | | |||||||	5' gcCTGCTCCGGAGCAGTAGCCa 3'
rno-miR-138-1-3p	Laptm4b	141	-22.21	2	18	1	19	3' gggacCACAACACUUCAUCGGc 5'	||| ||||:|| ||||	5' ---acGTGGTGTGGAGGAGCCc 3'
rno-miR-138-1-3p	Lcn2	154	-23.78	2	21	20	40	3' ggGACCACAACACUUCAUCGGc 5'	|||| | |||| |||:|||	5' gaCTGG-GATGTGCAGTGGCCt 3'
rno-miR-138-1-3p	Lcp1	143	-11.15	2	17	129	152	3' gggaccACAACAC--UUCAUCGGc 5'	|||| || |||||||:	5' catattTGTTCTGCCAAGTAGCTt 3'
rno-miR-138-1-3p	Lemd2	151	-18.42	2	12	750	771	3' gggaccacaacACUUCAUCGGc 5'	||:|||||||	5' cccacagcagcTGGAGTAGCCc 3'
rno-miR-138-1-3p	Lgsn	142	-9.95	2	20	14	37	3' gggACCACAACAC--UUCAUCGGc 5'	|| | || || |||||||:	5' agaTGTTATTATGACAAGTAGCTa 3'
rno-miR-138-1-3p	Lhfp	141	-12.46	2	20	806	826	3' gggACCACAACACUUCAUCGGc 5'	| ||| | || ||||||:	5' cagTAGTGATCTG-AGTAGCTt 3'
rno-miR-138-1-3p	Limd1	147	-20.16	2	21	1119	1141	3' ggGACCACA-ACACUUCAUCGGc 5'	:|||||| | | |||:|||	5' tgTTGGTGTATCAGCAGTGGCCa 3'
rno-miR-138-1-3p	Limd1	141	-23.1	2	21	1243	1262	3' ggGACCACAACACUUCAUCGGc 5'	||| || ||::||||||	5' taCTG--GTCCTGGGGTAGCCa 3'
rno-miR-138-1-3p	Lipa	145	-23.47	2	19	242	265	3' gggaCCACAA--CACUUCAUCGGc 5'	|||||| |||||| ||||	5' tatgGGTGTTACGTGAAGAAGCCa 3'
rno-miR-138-1-3p	Lipt1	147	-17.57	2	20	1431	1452	3' gggACCACAACACUUCAUCGGc 5'	|| | || ||||||||:	5' gcgTGTGGCTGGGAAGTAGCTa 3'
rno-miR-138-1-3p	Lnx2	142	-19.11	2	15	1535	1556	3' gggaccacAACACUUCAUCGGc 5'	||| |:|||:|||	5' tcttttctTTGGGGAGTGGCCa 3'
rno-miR-138-1-3p	LOC100271845	140	-10.63	2	9	132	153	3' gggaccacaacacuUCAUCGGc 5'	|||||||	5' ccagcaaagccaacAGTAGCCa 3'
rno-miR-138-1-3p	LOC100302372	147	-13.57	2	12	400	421	3' gggaccacaacACUUCAUCGGc 5'	| ||||||||	5' catgtgcacaaTTAAGTAGCCa 3'
rno-miR-138-1-3p	LOC100360616	142	-18.03	2	16	500	522	3' gggaccaCAACACU-UCAUCGGc 5'	|| |||| |||:|||	5' tgggacaGTGGTGACAGTGGCCt 3'
rno-miR-138-1-3p	LOC100360737	144	-10.99	2	16	434	455	3' gggaccaCAACACU-UCAUCGGc 5'	||| | | |||||||	5' tttaataGTT-TAACAGTAGCCc 3'
rno-miR-138-1-3p	LOC100360957	147	-15.72	2	16	79	100	3' gggaccaCAACACUUCAUCGGc 5'	| | | :|||||||	5' cctacagGGTCTAGAGTAGCCc 3'
rno-miR-138-1-3p	LOC100361177	144	-16.13	2	19	213	233	3' gggaCCACAACACUUCAUCGGc 5'	|| | || ||||||||:	5' aagcGGAG-TGAGAAGTAGCTa 3'
rno-miR-138-1-3p	LOC100361700	141	-17.45	2	17	1153	1174	3' gggaccACA-ACACUUCAUCGGc 5'	||| | | |||||||	5' gaaaacTGTCTCT-TAGTAGCCg 3'
rno-miR-138-1-3p	LOC100361750	143	-19.77	2	21	204	226	3' ggGACCA-CAACACUUCAUCGGc 5'	||| | || | |:||||||	5' acCTGTTCGTGGGCAGGTAGCCt 3'
rno-miR-138-1-3p	LOC100362279	144	-11.78	2	21	65	86	3' ggGACCACAACACUUCAUCGGc 5'	| | ||| || ||||||:	5' caCAGAAGTTCTGTAGTAGCTt 3'
rno-miR-138-1-3p	LOC100362464	155	-16.33	2	21	867	890	3' ggGACCACAACA--CUUCAUCGGc 5'	||| | || | ||||||||	5' tcCTGTTTTTTTTATAAGTAGCCc 3'
rno-miR-138-1-3p	LOC100362676	143	-21.57	2	21	844	868	3' ggGACC---ACAACACUUCAUCGGc 5'	|||| | || |||||:|||	5' ttCTGGAACTCCTGGGAAGTGGCCt 3'
rno-miR-138-1-3p	LOC100363005	140	-13.66	2	9	3385	3406	3' gggaccacaacacuUCAUCGGc 5'	|||||||	5' tatgtgaccattctAGTAGCCt 3'
rno-miR-138-1-3p	LOC100363074	140	-10.83	2	9	276	297	3' gggaccacaacacuUCAUCGGc 5'	|||||||	5' taggagagaaggccAGTAGCCt 3'
rno-miR-138-1-3p	LOC100363777	140	-10.83	2	9	276	297	3' gggaccacaacacuUCAUCGGc 5'	|||||||	5' taggagagaaggccAGTAGCCt 3'
rno-miR-138-1-3p	LOC100364366	140	-14.41	2	9	29	50	3' gggaccacaacacuUCAUCGGc 5'	|||||||	5' gcacccagcatcctAGTAGCCa 3'
rno-miR-138-1-3p	LOC100364687	140	-18.26	2	9	12	33	3' gggaccacaacacuUCAUCGGc 5'	|||||||	5' ggcggcctggcctcAGTAGCCt 3'
rno-miR-138-1-3p	LOC100364919	144	-16.13	2	19	213	233	3' gggaCCACAACACUUCAUCGGc 5'	|| | || ||||||||:	5' aagcGGAG-TGAGAAGTAGCTa 3'
rno-miR-138-1-3p	LOC100365269	140	-14.58	2	9	766	787	3' gggaccacaacacuUCAUCGGc 5'	|||||||	5' atggggaaagtcccAGTAGCCc 3'
rno-miR-138-1-3p	LOC100365491	147	-20.17	2	20	62	83	3' gggACCACAACACUUCAUCGGc 5'	||| ||||| ||||:|:|	5' gcaTGGGGTTGTTAAGTGGTCt 3'
rno-miR-138-1-3p	LOC100365958	141	-14.16	2	10	1661	1682	3' gggaccacaacacUUCAUCGGc 5'	:|||||||	5' aaatatgtgcaccGAGTAGCCa 3'
rno-miR-138-1-3p	LOC257650	157	-25.97	2	18	1138	1159	3' gggacCACAACACUUCAUCGGc 5'	| |||| :|||||||	5' tcccaGAGTTGCTGAGTAGCCg 3'
rno-miR-138-1-3p	LOC292199	141	-12.45	2	10	1713	1734	3' gggaccacaacacUUCAUCGGc 5'	:|||||||	5' ttctaccacaggaGAGTAGCCt 3'
rno-miR-138-1-3p	LOC302495	141	-11.63	2	14	1840	1861	3' gggaccacaACACUUCAUCGGc 5'	||| |||||||:	5' caacacacaTGTCAAGTAGCTt 3'
rno-miR-138-1-3p	LOC303259	145	-14.84	2	10	653	674	3' gggaccacaacacUUCAUCGGc 5'	||||||||	5' tagtgtgagcagcAAGTAGCCc 3'
rno-miR-138-1-3p	LOC303259	145	-14.84	2	10	646	667	3' gggaccacaacacUUCAUCGGc 5'	||||||||	5' tagtgtgagcagcAAGTAGCCc 3'
rno-miR-138-1-3p	LOC311352	144	-11.9	2	13	63	84	3' gggaccacaaCACUUCAUCGGc 5'	|| |||||||	5' attacttcaaGTTCAGTAGCCa 3'
rno-miR-138-1-3p	LOC498662	143	-26.49	2	20	1081	1102	3' gggACCACAACACUUCAUCGGc 5'	|||| || :|||:|||	5' ccgTGGTAGGGTTGAGTGGCCg 3'
rno-miR-138-1-3p	LOC499749	144	-19.65	2	17	291	312	3' gggaccACAACACUUCAUCGGc 5'	| ||| |:|||:|||	5' tctaccTTTTGGGGAGTGGCCa 3'
rno-miR-138-1-3p	LOC500726	142	-12.6	2	21	281	301	3' ggGACCACAACACUUCAUCGGc 5'	:|| | |||| ||||||:	5' cgTTGTTTTTGT-TAGTAGCTt 3'
rno-miR-138-1-3p	LOC678880	140	-13.44	2	9	679	700	3' gggaccacaacacuUCAUCGGc 5'	|||||||	5' cctttgttcaacacAGTAGCCc 3'
rno-miR-138-1-3p	LOC679038	140	-13.44	2	9	680	701	3' gggaccacaacacuUCAUCGGc 5'	|||||||	5' cctttgttcaacacAGTAGCCc 3'
rno-miR-138-1-3p	LOC679046	160	-20.59	2	21	182	203	3' ggGACCACAACACUUCAUCGGc 5'	||| ||| ||||||||	5' acCTGAATTTGCTAAGTAGCCa 3'
rno-miR-138-1-3p	LOC679383	148	-24.23	2	21	91	110	3' ggGACCACAACACUUCAUCGGc 5'	|||||| || | :||||||	5' gaCTGGTG-TGAG-GGTAGCCa 3'
rno-miR-138-1-3p	LOC679462	152	-21.26	2	21	2	23	3' ggGACCACAACACUUCAUCGGc 5'	|||| | | |||||||	5' acCTGGCCTGGCACAGTAGCCc 3'
rno-miR-138-1-3p	LOC680222	140	-14.53	3	21	1261	1282	3' ggGACCACAACACUUCAUCGgc 5'	|| ||| | |||||||	5' ttCTTGTGCTTAAAAGTAGCat 3'
rno-miR-138-1-3p	LOC680885	149	-13.73	2	14	106	127	3' gggaccacaACACUUCAUCGGc 5'	||| |||||||	5' aaggccaccTGTCCAGTAGCCt 3'
rno-miR-138-1-3p	LOC681004	143	-18.97	2	16	390	411	3' gggaccaCAACACUUCAUCGGc 5'	||| |||||||	5' gccgaccGTTACCCAGTAGCCg 3'
rno-miR-138-1-3p	LOC681290	140	-14.21	2	9	213	234	3' gggaccacaacacuUCAUCGGc 5'	|||||||	5' ctctcagtccctctAGTAGCCc 3'
rno-miR-138-1-3p	LOC681647	144	-19.21	2	13	487	508	3' gggaccacaaCACUUCAUCGGc 5'	||||:||||||	5' tgcttcagaaGTGAGGTAGCCc 3'
rno-miR-138-1-3p	LOC682416	141	-18.73	2	18	67	88	3' gggacCACAACACUUCAUCGGc 5'	||||| ||:|| ||||	5' gcaatGTGTTCTGGAGAAGCCa 3'
rno-miR-138-1-3p	LOC683512	164	-22.27	2	20	424	443	3' gggACCACAACACUUCAUCGGc 5'	||| || ||||||||||	5' ccaTGGGGT--TGAAGTAGCCa 3'
rno-miR-138-1-3p	LOC683538	150	-31.22	2	21	16	39	3' ggGACCAC-AACA-CUUCAUCGGc 5'	:||||| ||| |:||||||:	5' tcTTGGTGACTGTGGGAGTAGCTg 3'
rno-miR-138-1-3p	LOC684097	148	-12.26	2	15	196	216	3' gggaccacAACACUUCAUCGGc 5'	|| | ||||||||	5' tccagcctTTCT-AAGTAGCCc 3'
rno-miR-138-1-3p	LOC684112	146	-10.79	2	21	1862	1885	3' ggGACCACA-ACA-CUUCAUCGGc 5'	:|| | | | | | |||||||	5' caTTGCTTTATATCGTAGTAGCCa 3'
rno-miR-138-1-3p	LOC685808	160	-20.59	2	21	182	203	3' ggGACCACAACACUUCAUCGGc 5'	||| ||| ||||||||	5' acCTGAATTTGCTAAGTAGCCa 3'
rno-miR-138-1-3p	LOC686393	141	-19.43	2	19	278	300	3' gggaCCACAAC-ACUUCAUCGGc 5'	| ||||| ||||||:||:	5' tgtaGCTGTTGCTGAAGTGGCTt 3'
rno-miR-138-1-3p	LOC686539	146	-17.18	2	19	373	394	3' gggaCCACAACACUUCAUCGGc 5'	|| | | ||:|||||:|	5' agaaGGGGGTCTGGAGTAGTCa 3'
rno-miR-138-1-3p	LOC686539	140	-13.94	2	9	580	601	3' gggaccacaacacuUCAUCGGc 5'	|||||||	5' tccgaggatgcaccAGTAGCCt 3'
rno-miR-138-1-3p	LOC686765	149	-22.52	2	18	184	205	3' gggacCACAACACUUCAUCGGc 5'	| | ||||:||||||:	5' gaagaGAGATGTGGAGTAGCTg 3'
rno-miR-138-1-3p	LOC687090	162	-20.56	2	16	498	521	3' gggaccaCAACAC--UUCAUCGGc 5'	|||||| ||||||||	5' aatgcagGTTGTGGTAAGTAGCCc 3'
rno-miR-138-1-3p	LOC687192	143	-19.06	2	21	399	421	3' ggGACCAC-AACACUUCAUCGGc 5'	| | || |||| :||||||	5' ccCAGTTGCTTGTTTGGTAGCCc 3'
rno-miR-138-1-3p	LOC687713	147	-18.19	2	20	1668	1689	3' gggACCACAACACUUCAUCGGc 5'	|| | || |||||:|||	5' gagTGCTCATGGGAAGTGGCCt 3'
rno-miR-138-1-3p	LOC688681	140	-12.22	2	9	155	176	3' gggaccacaacacuUCAUCGGc 5'	|||||||	5' gcagaagaactcccAGTAGCCt 3'
rno-miR-138-1-3p	LOC688717	151	-25.26	2	21	227	251	3' ggGACCACAAC---ACUUCAUCGGc 5'	|||| | | |||||||||	5' ccCTGGATTAGCAAGGAAGTAGCCt 3'
rno-miR-138-1-3p	LOC690333	147	-31.88	2	21	1468	1491	3' ggGACCACAAC--ACUUCAUCGGc 5'	|||||| | |||||:|||	5' aaCTGGTGAGGAAGGAAGTGGCCg 3'
rno-miR-138-1-3p	LOC690350	140	-18.26	2	9	12	33	3' gggaccacaacacuUCAUCGGc 5'	|||||||	5' ggcggcctggcctcAGTAGCCt 3'
rno-miR-138-1-3p	LOC690784	163	-16.79	2	17	182	204	3' gggaccACA-ACACUUCAUCGGc 5'	||| | ||||||||||	5' gacaaaTGTATCTGAAGTAGCCt 3'
rno-miR-138-1-3p	LOC691138	148	-20.12	2	21	691	712	3' ggGACCACAACACUUCAUCGGc 5'	:| | ||| ||:||||||	5' tgTTCGGGTTCAGAGGTAGCCc 3'
rno-miR-138-1-3p	Lpar1	158	-16.32	2	21	1550	1570	3' ggGACCACAACACUUCAUCGGc 5'	:|| |||| ||||||||	5' cgTTGCTGTT-CCAAGTAGCCt 3'
rno-miR-138-1-3p	Lpcat1	153	-19.86	2	20	1006	1031	3' gggACCAC--AA--CACUUCAUCGGc 5'	||||| || | ||||||||	5' ccaTGGTGACTTAGGAAAAGTAGCCa 3'
rno-miR-138-1-3p	Lpin3	148	-16.91	3	21	497	518	3' ggGACCACAACACUUCAUCGgc 5'	|| ||| |||||||||	5' aaCTATAGTTATGAAGTAGCag 3'
rno-miR-138-1-3p	Lrch4	140	-18.02	2	9	131	152	3' gggaccacaacacuUCAUCGGc 5'	|||||||	5' actctagtgcccacAGTAGCCc 3'
rno-miR-138-1-3p	Lrig2	151	-16.65	2	21	106	128	3' ggGACCACAACACU-UCAUCGGc 5'	||| ||| | |||||||	5' atCTGACCATGTCAGAGTAGCCc 3'
rno-miR-138-1-3p	Lrpap1	143	-17.18	2	14	5	25	3' gggaccacaACACUUCAUCGGc 5'	|| | |||||||	5' agaagccacTG-GCAGTAGCCt 3'
rno-miR-138-1-3p	Lrrc1	140	-11.13	2	9	151	172	3' gggaccacaacacuUCAUCGGc 5'	|||||||	5' tccatcagcgtaccAGTAGCCt 3'
rno-miR-138-1-3p	Lrtm2	160	-23.22	2	19	1729	1749	3' gggaCCACAACACUUCAUCGGc 5'	||| ||| | |||||||	5' gaagGGTCTTG-GTAGTAGCCg 3'
rno-miR-138-1-3p	Lsm14a	152	-23.21	3	18	177	199	3' gggacCACA-ACACUUCAUCGgc 5'	|||| ||||:||||||	5' cataaGTGTGTGTGGAGTAGCag 3'
rno-miR-138-1-3p	Ltbp2	140	-18.37	2	19	461	481	3' gggaCCACAACACUUCAUCGGc 5'	||| || |:||||||:	5' agagGGT-CTGGGGAGTAGCTc 3'
rno-miR-138-1-3p	Luc7l3	159	-15.27	2	20	763	784	3' gggACCACAACACUUCAUCGGc 5'	| || | | |:|||||||	5' ccaTAGTATAGAGGAGTAGCCa 3'
rno-miR-138-1-3p	Ly6g5c	140	-13.95	2	9	70	91	3' gggaccacaacacuUCAUCGGc 5'	|||||||	5' tccaaaaccctcacAGTAGCCc 3'
rno-miR-138-1-3p	Lyl1	145	-11.99	2	10	200	221	3' gggaccacaacacUUCAUCGGc 5'	||||||||	5' aatcaacaaggccAAGTAGCCa 3'
rno-miR-138-1-3p	Lynx1	150	-17.28	2	21	316	341	3' ggGACCACAACA-CU---UCAUCGGc 5'	||||| | | || |||||||	5' taCTGGTTTAATAGAATTAGTAGCCa 3'
rno-miR-138-1-3p	Lypd6b	154	-19.5	2	20	555	577	3' gggACCACAACAC-UUCAUCGGc 5'	|| || | | ||||||||	5' ctgTGTTGGAGAGCAAGTAGCCa 3'
rno-miR-138-1-3p	Lzts1	140	-19.58	2	21	1095	1117	3' ggGACCACAACACUUC-AUCGGc 5'	|| || || ||||| |||||	5' gcCTTGTCTTTTGAAGATAGCCa 3'
rno-miR-138-1-3p	Man2a2	154	-31.67	2	21	216	236	3' ggGACCACAACACUUCAUCGGc 5'	|| | ||||| |||||||:	5' ccCTTGGGTTGT-AAGTAGCTg 3'
rno-miR-138-1-3p	Manba	140	-11.05	2	17	823	844	3' gggaccACAACACUUCAUCGGc 5'	|||| |||||||:	5' aaaaaaTGTTAATAAGTAGCTa 3'
rno-miR-138-1-3p	Map1b	143	-15.66	2	16	2939	2960	3' gggaccaCAACACUUCAUCGGc 5'	||| ||:||||||	5' acaattaGTTTAGAGGTAGCCa 3'
rno-miR-138-1-3p	Map3k7	145	-13.39	2	18	2195	2216	3' gggacCACAACACUUCAUCGGc 5'	|| ||| ||||||:|	5' tttaaGTAGTGTTAAGTAGTCt 3'
rno-miR-138-1-3p	Map3k7ip2	140	-10.21	2	9	437	458	3' gggaccacaacacuUCAUCGGc 5'	|||||||	5' cttttcaagcaattAGTAGCCa 3'
rno-miR-138-1-3p	Map4k5	151	-21.75	2	20	304	323	3' gggACCACAACACUUCAUCGGc 5'	||||||| | |||||||:	5' ccaTGGTGTT-T-AAGTAGCTc 3'
rno-miR-138-1-3p	Mapkapk2	146	-16.1	2	21	827	847	3' ggGACCACAACACUUCAUCGGc 5'	||| | || |||||||	5' ctCTGATCCGCTG-AGTAGCCt 3'
rno-miR-138-1-3p	Mark3	142	-18.02	3	20	9	31	3' gggACCACA-ACACUUCAUCGgc 5'	|||||| | |||||||	5' ttaTGGTGTAAATTAAGTAGCaa 3'
rno-miR-138-1-3p	Masp1	143	-20.45	2	17	2265	2287	3' gggaccACAACA-CUUCAUCGGc 5'	||| || |:|||:|||	5' tcacctTGTAGTAGGAGTGGCCt 3'
rno-miR-138-1-3p	Mast3	146	-16.67	2	19	1261	1282	3' gggaCCACAACACUUCAUCGGc 5'	| ||| :|||||||	5' caagGCTGTGCATGAGTAGCCc 3'
rno-miR-138-1-3p	Mca32	147	-15.04	2	21	258	283	3' ggGACCACAACA----CUUCAUCGGc 5'	|| | |||| ||||||||	5' atCTAATCTTGTCACCAAAGTAGCCa 3'
rno-miR-138-1-3p	Mcat	152	-20.33	2	13	1	21	3' gggaccacaaCACUUCAUCGGc 5'	||| |||||||	5' -gagccttgaGTGCAGTAGCCc 3'
rno-miR-138-1-3p	Mcl1	143	-20.88	2	21	287	309	3' ggGACCACAACACU-UCAUCGGc 5'	|||| | || | |||:|||	5' gtCTGGAGATGGAAGAGTGGCCa 3'
rno-miR-138-1-3p	Mcoln2	140	-16.53	2	18	636	658	3' gggacCACAACAC-UUCAUCGGc 5'	||| || | :|||:|||	5' tgcacGTGATGAGTGAGTGGCCc 3'
rno-miR-138-1-3p	Me1	146	-18.61	2	20	706	728	3' gggACCACAACACU-UCAUCGGc 5'	|| | |||| | :||||||	5' gggTGTTTTTGTTAGGGTAGCCt 3'
rno-miR-138-1-3p	Mfsd6	140	-16.35	2	17	257	278	3' gggaccACAACACUUCAUCGGc 5'	||||| |||| ||||	5' gaacaaTGTTGAGAAGGAGCCc 3'
rno-miR-138-1-3p	MGC105560	149	-22.96	3	20	1022	1047	3' gggACCACAAC---ACU-UCAUCGgc 5'	|||||||| ||| ||||||	5' cagTGGTGTTGAAATGATAGTAGCaa 3'
rno-miR-138-1-3p	MGC95152	141	-22.29	2	21	52	73	3' ggGACCAC-AACACUUCAUCGGc 5'	|| ||| | ||::||||||	5' tcCT-GTGCTCCTGGGGTAGCCc 3'
rno-miR-138-1-3p	Mier2	150	-21.79	2	20	1022	1045	3' gggACCACAA--CACUUCAUCGGc 5'	||| || |||||||:|||	5' tgaTGGGATTCAGTGAAGTGGCCa 3'
rno-miR-138-1-3p	Mitf	147	-12.03	2	21	110	132	3' ggGACCAC-AACACUUCAUCGGc 5'	:| ||| || |||||||	5' ttTTCGTGCTTTACCAGTAGCCc 3'
rno-miR-138-1-3p	Mixl1	141	-19.04	2	21	140	162	3' ggGACC--ACAACACUUCAUCGGc 5'	|||| |||| | :||||||	5' tgCTGGCTTGTTCT-TGGTAGCCa 3'
rno-miR-138-1-3p	Mkl1	147	-14.93	2	12	807	828	3' gggaccacaacACUUCAUCGGc 5'	|| |||||||	5' cacctcctcacTGTAGTAGCCa 3'
rno-miR-138-1-3p	Mkrn2	142	-13	2	21	885	905	3' ggGACCACAACACUUCAUCGGc 5'	:|| | || |||||||	5' ttTTGAAGGAGT-CAGTAGCCa 3'
rno-miR-138-1-3p	Mlc1	142	-15.79	2	19	139	160	3' gggaCCACAACACUUCAUCGGc 5'	||| | || ||||||:	5' tttgGGTTTCCTGTAGTAGCTt 3'
rno-miR-138-1-3p	Mllt4	140	-19.7	2	17	1536	1557	3' gggaccACAACACUUCAUCGGc 5'	||| ||||||||| |	5' gagaccTGTAGTGAAGTAGACa 3'
rno-miR-138-1-3p	Mmaa	146	-14.75	2	15	437	458	3' gggaccacAACACUUCAUCGGc 5'	|| ||||||:|||	5' ctaagaatTTCTGAAGTGGCCa 3'
rno-miR-138-1-3p	Mmp16	154	-26.86	2	21	1249	1273	3' ggGACCA--CAACA-CUUCAUCGGc 5'	||||| |||| |||||:|||	5' atCTGGTCATTTGTAGAAGTGGCCa 3'
rno-miR-138-1-3p	Mmp20	150	-11.14	2	17	1714	1734	3' gggaccACAACACUUCAUCGGc 5'	| || || |||||||	5' cagcatTATT-TGCAGTAGCCa 3'
rno-miR-138-1-3p	Mmp9	140	-18.8	2	21	763	784	3' ggGACCACAACACUUCAUCGGc 5'	|| | | || ::||||||	5' tgCTAGAGAGGTAGGGTAGCCg 3'
rno-miR-138-1-3p	Mpped1	146	-16.05	2	11	120	141	3' gggaccacaacaCUUCAUCGGc 5'	|:|||||||	5' accagccagtaaGGAGTAGCCt 3'
rno-miR-138-1-3p	Mpzl2	142	-9.69	2	19	1393	1414	3' gggaCCACAACACUUCAUCGGc 5'	| | || | ||||:|||	5' caaaGTTTTTTTTAAGTGGCCt 3'
rno-miR-138-1-3p	Mrpl10	145	-22.32	2	21	82	103	3' ggGACCACAACA-CUUCAUCGGc 5'	:||| | ||| |:|||:|||	5' atTTGGAG-TGTGGGAGTGGCCt 3'
rno-miR-138-1-3p	Mrps5	141	-17.82	2	18	321	342	3' gggacCACAACACUUCAUCGGc 5'	| | |||::||||||	5' ttacaGAGAAGTGGGGTAGCCt 3'
rno-miR-138-1-3p	Mrvi1	151	-19.02	2	21	697	719	3' ggGA-CCACAACACUUCAUCGGc 5'	|| ||||| | | |||||:|	5' caCTAGGTGTGGAGCAGTAGTCa 3'
rno-miR-138-1-3p	Mrvi1	145	-11.42	2	10	524	545	3' gggaccacaacacUUCAUCGGc 5'	||||||||	5' atacacaggctaaAAGTAGCCc 3'
rno-miR-138-1-3p	Ms4a2	144	-15.19	2	21	709	730	3' ggGACCACAACACUUCAUCGGc 5'	|| | | || ||||||:|	5' gaCTTGAGCTGGAAAGTAGTCa 3'
rno-miR-138-1-3p	Ms4a2	142	-23.55	3	21	1036	1059	3' ggGACC-AC-AACACUUCAUCGgc 5'	|||| || | | |:||||||	5' gtCTGGATGATGGAGGAGTAGCag 3'
rno-miR-138-1-3p	Msl1	148	-15.51	2	21	1	18	3' ggGACCACAACACUUCAUCGGc 5'	|| | | || | |||||||	5' --CT-GCGCTG-GCAGTAGCCt 3'
rno-miR-138-1-3p	Msl2l1	156	-16.07	2	17	379	400	3' gggaccACAACACUUCAUCGGc 5'	||| | ||||||||	5' ttttttTGTGGAAAAGTAGCCa 3'
rno-miR-138-1-3p	Mtch2	140	-11.75	2	9	642	663	3' gggaccacaacacuUCAUCGGc 5'	|||||||	5' caccgtagcacaacAGTAGCCc 3'
rno-miR-138-1-3p	Mtmr1	146	-21.99	2	19	1238	1259	3' gggaCCACAACACUUCAUCGGc 5'	|||| || ::||||||	5' gcgcGGTGAGGTCGGGTAGCCt 3'
rno-miR-138-1-3p	Mtss1	143	-15.83	2	21	636	659	3' ggGACCA--CAACACUUCAUCGGc 5'	||| | || :|||||||	5' tcCTGTTACATTTAAGAGTAGCCt 3'
rno-miR-138-1-3p	Mul1	146	-18.11	2	21	652	672	3' ggGACCACAACACUUCAUCGGc 5'	|| | |||| |:||||||	5' ttCTAG-GTTGGCAGGTAGCCt 3'
rno-miR-138-1-3p	Mxd1	141	-19.12	2	21	140	162	3' ggGACCACAACACU--UCAUCGGc 5'	|| | | ||||| ||||||:	5' gtCTTGAG-TGTGATCAGTAGCTt 3'
rno-miR-138-1-3p	Myocd	141	-16.61	2	20	1680	1700	3' gggACCACAACACUUCAUCGGc 5'	|| ||| | |||||||:	5' gcaTGCTGTAG-AAAGTAGCTg 3'
rno-miR-138-1-3p	Myod1	140	-13.57	2	21	324	343	3' ggGACCACAACACUUCAUCGGc 5'	||| | || || |||:|||	5' agCTGATCTT-TG-AGTGGCCa 3'
rno-miR-138-1-3p	Naalad2	141	-12.12	2	14	1	22	3' gggaccacaACACUUCAUCGGc 5'	||| |||||||:	5' gaacttttcTGTCAAGTAGCTt 3'
rno-miR-138-1-3p	Nab2	146	-21.9	2	20	1383	1405	3' gggAC-CACAACACUUCAUCGGc 5'	|| |||||||| || ||||	5' gtgTGTGTGTTGTGCAGGAGCCt 3'
rno-miR-138-1-3p	Napg	140	-9.84	2	9	990	1011	3' gggaccacaacacuUCAUCGGc 5'	|||||||	5' ataatatttagctcAGTAGCCc 3'
rno-miR-138-1-3p	Narf	152	-18.9	2	21	1376	1397	3' ggGACCACAACACUUCAUCGGc 5'	|| ||| |||:||||||	5' tgCTACAGTTATGAGGTAGCCa 3'
rno-miR-138-1-3p	Nat11	168	-27.64	2	21	1347	1368	3' ggGACCACAACACUUCAUCGGc 5'	|| | ||||| |||||||	5' tcCTTGGCTTGTGCAGTAGCCt 3'
rno-miR-138-1-3p	Nbl1	150	-15.96	2	21	968	992	3' ggGACCAC-AACACU--UCAUCGGc 5'	:| | | |||| | |||||||	5' ccTTAGAGCTTGTAACTAGTAGCCa 3'
rno-miR-138-1-3p	Ncald	145	-19.98	2	14	2417	2438	3' gggaccacaACACUUCAUCGGc 5'	||||:|||:|||	5' gtcatgctaTGTGGAGTGGCCc 3'
rno-miR-138-1-3p	Ncbp1	156	-14.56	2	21	63	84	3' ggGACCACAACACUUCAUCGGc 5'	:|| | | || |||||||	5' gtTTGCTTTCCTGTAGTAGCCt 3'
rno-miR-138-1-3p	Nde1	146	-35.49	3	21	542	562	3' ggGACCACAACACUUCAUCGgc 5'	||||||||| |:|||:||	5' ccCTGGTGTTG-GGAGTGGCat 3'
rno-miR-138-1-3p	Ndrg4	144	-12.41	2	18	440	463	3' gggacCACAACACU--UCAUCGGc 5'	|| || |: |||||||	5' tgacaGTCATGAGGACAGTAGCCa 3'
rno-miR-138-1-3p	Ndufaf4	145	-15.3	2	10	652	673	3' gggaccacaacacUUCAUCGGc 5'	||||||||	5' attctaggagaaaAAGTAGCCa 3'
rno-miR-138-1-3p	Necap2	140	-10.5	2	9	387	408	3' gggaccacaacacuUCAUCGGc 5'	|||||||	5' tgcactccgtccacAGTAGCCt 3'
rno-miR-138-1-3p	Nedd1	140	-12.25	2	17	324	345	3' gggaccACAACACUUCAUCGGc 5'	| || | |:||||||	5' tccaaaTTTTTTTAGGTAGCCa 3'
rno-miR-138-1-3p	Nedd4	140	-17.05	2	21	1434	1457	3' ggGACC--AC-AACACUUCAUCGGc 5'	|||| || || | ||||:|||	5' ttCTGGAATGCTTAT-AAGTGGCCt 3'
rno-miR-138-1-3p	Nedd9	144	-14.73	2	18	401	423	3' gggacCACAACA-CUUCAUCGGc 5'	|||| || | |||||:|	5' tctacGTGTAGTAGTAGTAGTCt 3'
rno-miR-138-1-3p	Nek7	150	-20.55	2	20	2402	2424	3' gggACCAC-AACACUUCAUCGGc 5'	||||| ||| ::||||||	5' gggTGGTGAATGTAGGGTAGCCt 3'
rno-miR-138-1-3p	Nek9	156	-14.9	2	21	1074	1095	3' ggGACCACAACACUUCAUCGGc 5'	|| ||| | :|||||||	5' atCTTTTGTACTTGAGTAGCCc 3'
rno-miR-138-1-3p	Nek9	152	-24.19	2	21	1494	1515	3' ggGACCACAACACUUCAUCGGc 5'	|||||| || |||| ||||	5' ggCTGGTGCTGGGAAGAAGCCc 3'
rno-miR-138-1-3p	Nelf	146	-21.61	2	21	855	875	3' ggGACCACAACACUUCAUCGGc 5'	|||| | || |||||||:	5' ggCTGGAG-AGTCAAGTAGCTg 3'
rno-miR-138-1-3p	Nfasc	144	-24.87	3	21	5010	5031	3' ggGACCACAACACUUCAUCGgc 5'	| ||||||| |::|||||	5' tgCAGGTGTTGAGGGGTAGCag 3'
rno-miR-138-1-3p	Nhlrc3	140	-13.25	2	17	2023	2044	3' gggaccACAACACUUCAUCGGc 5'	| || || |||||:|	5' ctgtccTCTTCTGCAGTAGTCc 3'
rno-miR-138-1-3p	Nipal4	145	-11.05	2	14	473	494	3' gggaccacaACACUUCAUCGGc 5'	|| :|||||||	5' gcaagcacaTGCCGAGTAGCCt 3'
rno-miR-138-1-3p	Nisch	150	-22.29	2	21	419	439	3' ggGACCACAACACUUCAUCGGc 5'	||||| |:|||||||	5' ggCTGGT-AGCAGGAGTAGCCa 3'
rno-miR-138-1-3p	Nkiras2	149	-20.03	2	21	950	976	3' ggGACC-ACAACA--CU--UCAUCGGc 5'	:||| |||| | |: |||||||	5' tcTTGGTTGTTTTTCGGCTAGTAGCCc 3'
rno-miR-138-1-3p	Nlrp10	143	-12.46	2	12	181	202	3' gggaccacaacACUUCAUCGGc 5'	| :|||||||	5' gtgaagtcactTTGAGTAGCCc 3'
rno-miR-138-1-3p	Nol3	145	-12.84	2	10	327	348	3' gggaccacaacacUUCAUCGGc 5'	||||||||	5' tattccactcccaAAGTAGCCc 3'
rno-miR-138-1-3p	Notch1	143	-19.79	2	21	1331	1353	3' ggGACCACAACACU-UCAUCGGc 5'	|| ||| ||| ||||||:	5' gcCTTGTGACCTGACAGTAGCTc 3'
rno-miR-138-1-3p	Npat	156	-25.24	2	21	725	746	3' ggGACCACAACACUUCAUCGGc 5'	:| | |||||| |||||:|	5' aaTTTGAGTTGTGTAGTAGTCg 3'
rno-miR-138-1-3p	Nptxr	140	-20.4	2	20	340	361	3' gggACCACAACA-CUUCAUCGGc 5'	| ||| || |||||:|||	5' ggaTCGTG-GGTAGAAGTGGCCt 3'
rno-miR-138-1-3p	Npy1r	141	-11.19	2	10	1109	1130	3' gggaccacaacacUUCAUCGGc 5'	:|||||||	5' atcatagaatactGAGTAGCCc 3'
rno-miR-138-1-3p	Nr3c1	147	-11.22	2	12	1296	1317	3' gggaccacaacACUUCAUCGGc 5'	|| |||||||	5' aaaacagaagcTGTAGTAGCCc 3'
rno-miR-138-1-3p	Nr4a3	141	-15.66	2	10	1733	1754	3' gggaccacaacacUUCAUCGGc 5'	:|||||||	5' aggtgaaagaactGAGTAGCCc 3'
rno-miR-138-1-3p	Nr4a3	140	-18.36	2	15	1256	1276	3' gggaccacAACACUUCAUCGGc 5'	||||| ||||||:	5' aagaccccTTGTG-AGTAGCTt 3'
rno-miR-138-1-3p	Nsun2	151	-18.04	2	14	1408	1428	3' gggaccacaACACUUCAUCGGc 5'	||| ||||||||	5' ccaagtcccTGT-AAGTAGCCc 3'
rno-miR-138-1-3p	Nsun2	145	-14.18	2	14	1666	1687	3' gggaccacaACACUUCAUCGGc 5'	|| :|||||||	5' gtacctcacTGCCGAGTAGCCt 3'
rno-miR-138-1-3p	Nt5dc3	157	-15.19	2	14	42	63	3' gggaccacaACACUUCAUCGGc 5'	||| ||||||||	5' ctcacagagTGTCAAGTAGCCt 3'
rno-miR-138-1-3p	Ntng1	143	-19.58	2	21	2157	2181	3' ggGACCACAACAC---UUCAUCGGc 5'	:||| ||| :|||||||	5' ctTTGGCTCAGTGCCAGAGTAGCCa 3'
rno-miR-138-1-3p	Nudt7	148	-20.94	2	17	1113	1134	3' gggaccACAACACUUCAUCGGc 5'	|| | | |||||||	5' cttaccTGGTTTCCAGTAGCCa 3'
rno-miR-138-1-3p	Nup98	142	-15.76	2	20	518	541	3' gggACCACA--ACACUUCAUCGGc 5'	|| | | |||| |||:|||	5' ccaTGCTATCATGTGCAGTGGCCc 3'
rno-miR-138-1-3p	Nusap1	156	-14.36	2	17	355	376	3' gggaccACAACACUUCAUCGGc 5'	| |||| |||||||	5' ccacatTTTTGTTCAGTAGCCt 3'
rno-miR-138-1-3p	Nxph1	142	-22.55	2	21	457	477	3' ggGACCACAACACUUCAUCGGc 5'	|| || | ||:||||||:	5' tcCTACTGCT-TGGAGTAGCTg 3'
rno-miR-138-1-3p	Obfc2b	144	-21.7	2	13	91	112	3' gggaccacaaCACUUCAUCGGc 5'	||||||||||:	5' ggattagaggGTGAAGTAGCTg 3'
rno-miR-138-1-3p	Odf3l1	155	-25.9	2	21	89	111	3' ggGACCACA-ACACUUCAUCGGc 5'	||||||| || :|||:|||	5' agCTGGTGTCTGCTGAGTGGCCa 3'
rno-miR-138-1-3p	Ogt	146	-18.45	2	21	1817	1837	3' ggGACCACAACACUUCAUCGGc 5'	|||| | ||||||||	5' ttCTGG-CACGACAAGTAGCCa 3'
rno-miR-138-1-3p	Olfml2a	142	-11.98	2	16	296	318	3' gggaccaCAACACU-UCAUCGGc 5'	|| | | |||||||	5' aggctacGTCCTCACAGTAGCCa 3'
rno-miR-138-1-3p	Olfml2a	141	-15.41	2	17	3239	3258	3' gggaccACAACACUUCAUCGGc 5'	||| ||||||||:|	5' gctaacTGT--TGAAGTAGTCa 3'
rno-miR-138-1-3p	Olig1	164	-29.2	2	21	1159	1181	3' ggGACCACAAC-ACU-UCAUCGGc 5'	:||| |||| ||| |||||||	5' ttTTGG-GTTGTTGACAGTAGCCg 3'
rno-miR-138-1-3p	Orai2	147	-19.68	2	13	60	82	3' gggaccacaaCA-CUUCAUCGGc 5'	|| |:|||||||	5' cacgcagccgGTAGGAGTAGCCa 3'
rno-miR-138-1-3p	Osbpl2	145	-19.25	2	15	89	111	3' gggaccacAACA-CUUCAUCGGc 5'	|||| ||:||||||	5' agccacaaTTGTGGAGGTAGCCt 3'
rno-miR-138-1-3p	Osgin1	152	-20.25	2	19	205	225	3' gggaCCACAACACUUCAUCGGc 5'	|||| | | |||||||	5' ccaaGGTG-GGAGCAGTAGCCa 3'
rno-miR-138-1-3p	Pacsin2	144	-17.09	2	21	1040	1061	3' ggGACCACAACACUUCAUCGGc 5'	|| | || || |||||:|	5' tcCTAGGATTTTGTAGTAGTCa 3'
rno-miR-138-1-3p	Padi2	158	-20.2	2	19	834	855	3' gggaCCACAACACUUCAUCGGc 5'	|| || |||||||||	5' ccgaGGGCCTGAGAAGTAGCCa 3'
rno-miR-138-1-3p	Pak3	156	-18.98	2	14	203	225	3' gggaccacaACA-CUUCAUCGGc 5'	||| |||||||||	5' ggccagcaaTGTCGAAGTAGCCa 3'
rno-miR-138-1-3p	Pald	140	-20.96	2	17	1546	1567	3' gggaccACAACACUUCAUCGGc 5'	| | |||:||||||	5' ccatctTATACTGAGGTAGCCg 3'
rno-miR-138-1-3p	Palm	142	-11.84	2	11	913	934	3' gggaccacaacaCUUCAUCGGc 5'	| |||||||	5' ggcagacaggcaGCAGTAGCCa 3'
rno-miR-138-1-3p	Panx2	143	-18.47	2	19	588	609	3' gggaCCACA-ACACUUCAUCGGc 5'	| ||| |||| |||:|||	5' ggacGATGTGTGTG-AGTGGCCt 3'
rno-miR-138-1-3p	Paqr5	141	-19.12	2	20	37	61	3' gggACCACAAC--ACU-UCAUCGGc 5'	||||| || | | |||:|||	5' atgTGGTGCTGGCTTACAGTGGCCa 3'
rno-miR-138-1-3p	Park7	165	-21.4	2	14	127	148	3' gggaccacaACACUUCAUCGGc 5'	||||||||||||	5' gaactaacgTGTGAAGTAGCCc 3'
rno-miR-138-1-3p	Pbrm1	142	-19.28	2	19	29	50	3' gggaCCACAACACUUCAUCGGc 5'	| ||| | | :||||||	5' aagaGTTGTGGAGCGGTAGCCa 3'
rno-miR-138-1-3p	Pdcd1	144	-17.21	2	17	331	352	3' gggaccACAACACUUCAUCGGc 5'	|| | :|||||||	5' acagccTGACTTTGAGTAGCCc 3'
rno-miR-138-1-3p	Pdlim2	141	-20.62	2	14	205	226	3' gggaccacaACACUUCAUCGGc 5'	| ||||||:|||	5' atactacagTCTGAAGTGGCCg 3'
rno-miR-138-1-3p	Pdrg1	141	-10.93	2	15	265	288	3' gggaccacAACACU--UCAUCGGc 5'	|| | | |||||||	5' gccgacacTTCTCAACAGTAGCCt 3'
rno-miR-138-1-3p	Per2	143	-12.83	2	17	1349	1371	3' gggaccACAACACU-UCAUCGGc 5'	|| | |: |||||||	5' tcacaaTGATCAGGTAGTAGCCa 3'
rno-miR-138-1-3p	Pex19	146	-20.28	2	21	406	432	3' ggGACC---ACAACAC--UUCAUCGGc 5'	|||| || | | ||||||||	5' ctCTGGGAATGAGGAGAAAAGTAGCCt 3'
rno-miR-138-1-3p	Pgk1	145	-25.89	2	21	64	90	3' ggGACCACAA-CAC-U---UCAUCGGc 5'	:||||||| ||| | |||:|||	5' atTTGGTGTTAGTGCAGCTAGTGGCCa 3'
rno-miR-138-1-3p	Phf17	152	-28.47	2	21	458	480	3' ggGAC-CA-CAACACUUCAUCGGc 5'	||| || |||||| ||||||:	5' ggCTGTGTGGTTGTG-AGTAGCTg 3'
rno-miR-138-1-3p	Phf20l1	148	-10.28	2	17	740	761	3' gggaccACAACACUUCAUCGGc 5'	| || | |||||||	5' ttagttTCTTTAGTAGTAGCCt 3'
rno-miR-138-1-3p	Pik3c2a	154	-14.96	2	19	1077	1098	3' gggaCCACAACACUUCAUCGGc 5'	| | || |:|||||||	5' tgaaGTTATTAGGGAGTAGCCa 3'
rno-miR-138-1-3p	Pik3c2a	146	-14.22	2	20	2051	2073	3' gggACCACAACAC-UUCAUCGGc 5'	| | | | | ||||||||	5' tgaTAGGGAGGAGAAAGTAGCCt 3'
rno-miR-138-1-3p	Pink1	144	-15.08	2	21	212	231	3' ggGACCACAACACUUCAUCGGc 5'	:| || |||| ||||:|||	5' gtTTAGT-TTGT-AAGTGGCCa 3'
rno-miR-138-1-3p	Pkn2	140	-13.52	2	17	989	1010	3' gggaccACAACACUUCAUCGGc 5'	| |||| |||:|||	5' catcacTTTTGTACAGTGGCCa 3'
rno-miR-138-1-3p	Pla2g2c	141	-20.68	2	18	278	299	3' gggacCACAACACUUCAUCGGc 5'	| | || |::||||||	5' ggcaaGAGGTGGGGGGTAGCCt 3'
rno-miR-138-1-3p	Plagl2	140	-9.6	2	9	1239	1260	3' gggaccacaacacuUCAUCGGc 5'	|||||||	5' cagtctcagaagccAGTAGCCt 3'
rno-miR-138-1-3p	Plagl2	140	-14.12	2	9	2025	2046	3' gggaccacaacacuUCAUCGGc 5'	|||||||	5' cctaaacctcccttAGTAGCCt 3'
rno-miR-138-1-3p	Pld1	141	-13.38	2	10	1711	1732	3' gggaccacaacacUUCAUCGGc 5'	:|||||||	5' ccagtgcagcccaGAGTAGCCt 3'
rno-miR-138-1-3p	Pld2	162	-20.99	2	15	142	163	3' gggaccacAACACUUCAUCGGc 5'	||| |||||||||	5' acctttacTTGAGAAGTAGCCa 3'
rno-miR-138-1-3p	Plekha1	143	-14.35	2	16	1960	1981	3' gggaccaCAACACUUCAUCGGc 5'	|| || |||||||:	5' cagcaagGTCGTTAAGTAGCTa 3'
rno-miR-138-1-3p	Plekhb1	145	-20.93	2	21	436	455	3' ggGACCACAACACUUCAUCGGc 5'	| || ||||| |||:|||	5' ggCAGGGGTTGT--AGTGGCCt 3'
rno-miR-138-1-3p	Plekhb2	140	-15.01	2	9	2226	2247	3' gggaccacaacacuUCAUCGGc 5'	|||||||	5' tcgctagtgcccacAGTAGCCt 3'
rno-miR-138-1-3p	Plekhm1	167	-23.81	2	21	997	1021	3' ggGACC---ACAACACUUCAUCGGc 5'	|||| |||| | ||||||||	5' tcCTGGAATTGTTTTCAAGTAGCCt 3'
rno-miR-138-1-3p	Pm20d2	147	-19.88	2	18	1935	1955	3' gggacCACAACACUUCAUCGGc 5'	|| | || |||||||	5' cttaaGTCTCCTG-AGTAGCCg 3'
rno-miR-138-1-3p	Pnma2	141	-11.35	2	14	923	944	3' gggaccacaACACUUCAUCGGc 5'	| | |||||||	5' aggggagaaTTTACAGTAGCCt 3'
rno-miR-138-1-3p	Pnmal1	140	-13.21	2	9	249	270	3' gggaccacaacacuUCAUCGGc 5'	|||||||	5' tggacaaggtaattAGTAGCCt 3'
rno-miR-138-1-3p	Pnpt1	150	-13.97	2	15	127	148	3' gggaccacAACACUUCAUCGGc 5'	|| |:|||||||	5' ttttttatTTCAGGAGTAGCCt 3'
rno-miR-138-1-3p	Polm	141	-21.78	2	19	374	396	3' gggaCCACAAC-ACUUCAUCGGc 5'	||||||| |||| ||||	5' atgaGGTGTTGCAGAAGAAGCCt 3'
rno-miR-138-1-3p	Pot1b	141	-19.02	2	20	30	50	3' gggACCACAACACUUCAUCGGc 5'	||| | ||| |||||:|	5' aggTGG-GGAGTGTAGTAGTCt 3'
rno-miR-138-1-3p	Pou1f1	141	-18.02	2	14	11	32	3' gggaccacaACACUUCAUCGGc 5'	|||| :||||||	5' tggtagccaTGTGTGGTAGCCt 3'
rno-miR-138-1-3p	Ppap2b	143	-14.23	2	16	1505	1526	3' gggaccaCAACACUUCAUCGGc 5'	||| || :||||||	5' tatcataGTTCTGTGGTAGCCa 3'
rno-miR-138-1-3p	Ppapdc2	144	-17.52	3	17	755	776	3' gggaccACAACACUUCAUCGgc 5'	||||| |||||||	5' caatccTGTTGACAAGTAGCat 3'
rno-miR-138-1-3p	Ppcdc	141	-12.37	2	10	1539	1560	3' gggaccacaacacUUCAUCGGc 5'	:|||||||	5' cctttctacaccaGAGTAGCCt 3'
rno-miR-138-1-3p	Ppm1l	144	-20.62	2	18	392	414	3' gggacCACAAC-ACUUCAUCGGc 5'	||| || || :||||||	5' tcaccGTGATGATGTGGTAGCCa 3'
rno-miR-138-1-3p	Ppm1l	141	-10.44	2	10	2207	2228	3' gggaccacaacacUUCAUCGGc 5'	:|||||||	5' acacataaaacaaGAGTAGCCc 3'
rno-miR-138-1-3p	Ppp1cb	144	-18.56	3	17	734	755	3' gggaccACAACACUUCAUCGgc 5'	| ||||| ||||||	5' atgctcTATTGTGCAGTAGCat 3'
rno-miR-138-1-3p	Ppp1r2	142	-16.58	2	11	906	927	3' gggaccacaacaCUUCAUCGGc 5'	| |||||||	5' gaaccagagctaGTAGTAGCCg 3'
rno-miR-138-1-3p	Ppp1r2	140	-10.04	2	17	826	847	3' gggaccACAACACUUCAUCGGc 5'	| || | ||||||:|	5' agggacTCTTCTCAAGTAGTCt 3'
rno-miR-138-1-3p	Ppp1r3a	148	-12.11	2	17	3882	3903	3' gggaccACAACACUUCAUCGGc 5'	| || | |||||||	5' agacctTATTTTACAGTAGCCt 3'
rno-miR-138-1-3p	Ppp1r3c	142	-15.52	2	19	616	637	3' gggaCCACAACACUUCAUCGGc 5'	|| | | ||||||||:	5' ttgaGGGCTAGAGAAGTAGCTc 3'
rno-miR-138-1-3p	Ppp1r3d	143	-12.35	2	16	861	882	3' gggaccaCAACACUUCAUCGGc 5'	||| | ||||:|||	5' aatttccGTTTTCAAGTGGCCa 3'
rno-miR-138-1-3p	Ppp2cb	152	-24.33	2	21	237	257	3' ggGAC-CACAACACUUCAUCGGc 5'	||| || ||| |||||||	5' gcCTGCCTGCTGT--AGTAGCCg 3'
rno-miR-138-1-3p	Ppp2r3a	145	-13.42	2	15	1144	1166	3' gggaccacAACACU-UCAUCGGc 5'	| || | |||||||	5' attttaaaTGGTCAGAGTAGCCt 3'
rno-miR-138-1-3p	Ppp3r1	143	-16.3	2	21	761	783	3' ggGACCA-CAACACUUCAUCGGc 5'	||| | || | ||||||:|	5' ggCTGATACTTTTTAAGTAGTCg 3'
rno-miR-138-1-3p	Ppp4r2	142	-25.5	2	21	2522	2542	3' ggGACCACAACACUUCAUCGGc 5'	:||| | |||||||||:	5' ctTTGGAG-GCTGAAGTAGCTg 3'
rno-miR-138-1-3p	Pptc7	151	-22.67	2	21	2807	2829	3' ggGACCACA-ACACUUCAUCGGc 5'	:|| | | || :|||||||	5' ccTTGCTCTGGGTAGAGTAGCCa 3'
rno-miR-138-1-3p	Pptc7	144	-23.25	2	18	2628	2650	3' gggacCACAAC-ACUUCAUCGGc 5'	||| | |||||||||:	5' atcaaGTGGAGATGAAGTAGCTg 3'
rno-miR-138-1-3p	Prdx3	147	-25.75	3	21	294	317	3' ggGACCACA--ACACUUCAUCGgc 5'	:|||| | ||||||||||	5' gcTTGGTCTACAGTGAAGTAGCac 3'
rno-miR-138-1-3p	Prdx3	144	-20.35	3	21	329	350	3' ggGACCACAACACUUCAUCGgc 5'	:| ||| |||||||||	5' acTTAGTGAAATGAAGTAGCac 3'
rno-miR-138-1-3p	Prdx3	144	-19.65	3	21	362	383	3' ggGACCACAACACUUCAUCGgc 5'	:| ||| |||||||||	5' acTTAGTGAAATGAAGTAGCat 3'
rno-miR-138-1-3p	Prf1	142	-22	3	21	93	117	3' ggGAC-CACAA--CACUUCAUCGgc 5'	||| | ||| ||| ||||||	5' gcCTGAGAGTTGGGTGTAGTAGCac 3'
rno-miR-138-1-3p	Prickle2	140	-21.53	2	13	252	273	3' gggaccacaaCACUUCAUCGGc 5'	|||:|||:|||	5' cctttccaagGTGGAGTGGCCa 3'
rno-miR-138-1-3p	Prima1	143	-22.65	2	21	1346	1368	3' ggGA-CCACAACACUUCAUCGGc 5'	|| ||||| |||||| |||	5' agCTGGGTGTCCTGAAGTTGCCa 3'
rno-miR-138-1-3p	Prkaa2	140	-12.49	2	9	833	854	3' gggaccacaacacuUCAUCGGc 5'	|||||||	5' cctctctcttcctcAGTAGCCa 3'
rno-miR-138-1-3p	Prkce	158	-24.61	2	20	243	265	3' gggACCA-CAACACUUCAUCGGc 5'	|| | | | ||:|||||||	5' cagTGCTAGGTCTGGAGTAGCCg 3'
rno-miR-138-1-3p	Prpf18	145	-20.91	2	10	2495	2516	3' gggaccacaacacUUCAUCGGc 5'	||||||||	5' gtctcggacgtccAAGTAGCCg 3'
rno-miR-138-1-3p	Prpf38b	140	-19.92	2	21	69	90	3' ggGACCACAACACUUCAUCGGc 5'	:|| |||||| |||||::	5' agTTGAGGTTGTGCAGTAGTTa 3'
rno-miR-138-1-3p	Prr18	141	-17.45	2	17	1213	1234	3' gggaccACA-ACACUUCAUCGGc 5'	||| | | |||||||	5' gaaaacTGTCTCT-TAGTAGCCg 3'
rno-miR-138-1-3p	Prr6	144	-11.97	2	13	1	15	3' gggaccacaaCACUUCAUCGGc 5'	| | |||||||	5' -------gcaGGGCAGTAGCCc 3'
rno-miR-138-1-3p	Prrx2	150	-17.39	2	11	43	64	3' gggaccacaacaCUUCAUCGGc 5'	|||||||||	5' accgcagtaaagGAAGTAGCCt 3'
rno-miR-138-1-3p	Prrxl1	146	-16.93	2	11	67	88	3' gggaccacaacaCUUCAUCGGc 5'	|:|||||||	5' tctgaaccacaaGGAGTAGCCa 3'
rno-miR-138-1-3p	Psd2	140	-21.91	2	20	1272	1296	3' gggAC-CACA-ACA-CUUCAUCGGc 5'	|| |||| || |::||||||	5' gtgTGTGTGTGGGTGGGGGTAGCCc 3'
rno-miR-138-1-3p	Psg19	156	-12.98	2	17	422	443	3' gggaccACAACACUUCAUCGGc 5'	|| || | |||||||	5' ttcaatTGCTGAGTAGTAGCCc 3'
rno-miR-138-1-3p	Psmd11	154	-21.78	2	21	69	89	3' ggGACCACAACACUUCAUCGGc 5'	|| ||||| || |||||:|	5' tcCTAGTGTTCTG-AGTAGTCa 3'
rno-miR-138-1-3p	Psrc1	141	-21.94	2	21	374	400	3' ggGACC-ACAA---CA-CUUCAUCGGc 5'	|||| |||| | |||||:|||	5' caCTGGCTGTTTCCATAGAAGTGGCCt 3'
rno-miR-138-1-3p	Pttg1ip	140	-12.08	2	9	1199	1220	3' gggaccacaacacuUCAUCGGc 5'	|||||||	5' tcacctagcagctcAGTAGCCt 3'
rno-miR-138-1-3p	Rab10	145	-19.56	2	21	1123	1142	3' ggGACCACAACACUUCAUCGGc 5'	||| | || |||||||	5' ctCTG--GCAGTTCAGTAGCCc 3'
rno-miR-138-1-3p	Rab11fip3	141	-19.94	2	14	1665	1686	3' gggaccacaACACUUCAUCGGc 5'	|| ||||||||:	5' tcagctcccTGAGAAGTAGCTc 3'
rno-miR-138-1-3p	Rab18	145	-12.86	2	10	1009	1030	3' gggaccacaacacUUCAUCGGc 5'	||||||||	5' aagttactgtaacAAGTAGCCa 3'
rno-miR-138-1-3p	Rab1b	153	-25.6	2	21	378	399	3' ggGA-CCACAACACUUCAUCGGc 5'	|| |||| | | |||||||	5' ccCTGGGTGCAG-GCAGTAGCCa 3'
rno-miR-138-1-3p	Rab22a	143	-17.25	2	18	2860	2883	3' gggacCACAACA-C-UUCAUCGGc 5'	|| |||| | |||||||:	5' aagatGTTTTGTAGTAAGTAGCTg 3'
rno-miR-138-1-3p	Rab31	142	-18.8	2	20	1346	1371	3' gggACCACAAC----ACUUCAUCGGc 5'	| | |||| ||||||:|||	5' caaTTGAGTTGAAGTTGAAGTGGCCt 3'
rno-miR-138-1-3p	Rab3gap2	140	-9.6	2	9	1	9	3' gggaccacaacacuUCAUCGGc 5'	|||||||	5' -------------cAGTAGCCc 3'
rno-miR-138-1-3p	Rab5b	140	-10.94	2	9	1676	1697	3' gggaccacaacacuUCAUCGGc 5'	|||||||	5' aaaggaaagaccacAGTAGCCt 3'
rno-miR-138-1-3p	Rab5c	150	-20.73	2	17	272	292	3' gggaccACAACACUUCAUCGGc 5'	|| || | |||||||	5' gcccttTGCTG-GTAGTAGCCa 3'
rno-miR-138-1-3p	Rabgap1	141	-12.94	2	10	1061	1082	3' gggaccacaacacUUCAUCGGc 5'	:|||||||	5' ctgaagcctcccaGAGTAGCCa 3'
rno-miR-138-1-3p	Rabl5	141	-24.31	2	21	330	358	3' ggGACCAC-AA-----C-ACUUCAUCGGc 5'	|||||| || | ||||||:|||	5' taCTGGTGATTAATGGGATGAAGTGGCCc 3'
rno-miR-138-1-3p	Rad52	141	-13.73	2	10	375	396	3' gggaccacaacacUUCAUCGGc 5'	:|||||||	5' gcatggatccacaGAGTAGCCt 3'
rno-miR-138-1-3p	Rad54l	148	-17.98	2	21	3	24	3' ggGACCACAACACUUCAUCGGc 5'	||||| | | :||||||:	5' agCTGGTCTGGATGAGTAGCTt 3'
rno-miR-138-1-3p	Rad54l2	141	-16.95	2	14	482	503	3' gggaccacaACACUUCAUCGGc 5'	|| ||||||||:	5' agaggtcacTGGGAAGTAGCTa 3'
rno-miR-138-1-3p	Rag1	144	-24.4	2	21	1958	1979	3' ggGACCACAACACUUCAUCGGc 5'	|||| ||| :||||||	5' tgCTGGCACTGTTCGGTAGCCg 3'
rno-miR-138-1-3p	Ranbp10	145	-31.21	2	20	2162	2182	3' gggACCACAACACUUCAUCGGc 5'	||| ||||||:|||:||:	5' acaTGG-GTTGTGGAGTGGCTg 3'
rno-miR-138-1-3p	Ranbp3l	141	-11.13	2	10	22	43	3' gggaccacaacacUUCAUCGGc 5'	:|||||||	5' acatctacagaaaGAGTAGCCa 3'
rno-miR-138-1-3p	Rap1gds1	140	-11.53	2	9	835	856	3' gggaccacaacacuUCAUCGGc 5'	|||||||	5' tctaaaccttcatcAGTAGCCa 3'
rno-miR-138-1-3p	Rap1gds1	140	-10.76	2	9	1085	1106	3' gggaccacaacacuUCAUCGGc 5'	|||||||	5' gttttaaaagccatAGTAGCCa 3'
rno-miR-138-1-3p	Rarb	144	-19.41	2	19	927	947	3' gggaCCACAACACUUCAUCGGc 5'	|||| || | |||:|||	5' tgagGGTG-TGGGCAGTGGCCt 3'
rno-miR-138-1-3p	Rasl11b	150	-26.43	2	15	541	562	3' gggaccacAACACUUCAUCGGc 5'	|||||:||||||:	5' gggtacctTTGTGGAGTAGCTg 3'
rno-miR-138-1-3p	Rasl12	141	-16.6	2	11	1098	1120	3' gggaccacaacaCU-UCAUCGGc 5'	|| |||||||	5' ctttggctcccaGACAGTAGCCc 3'
rno-miR-138-1-3p	Rassf5	143	-14.13	2	21	855	877	3' ggGACCAC-AACACUUCAUCGGc 5'	||| || || | ||||||:	5' agCTGTTGCCTGAGTAGTAGCTt 3'
rno-miR-138-1-3p	Rassf5	140	-13.4	2	9	1243	1264	3' gggaccacaacacuUCAUCGGc 5'	|||||||	5' agactataccacccAGTAGCCa 3'
rno-miR-138-1-3p	Rbbp5	148	-17.99	2	17	25	46	3' gggaccACAACACUUCAUCGGc 5'	||| || |:||||||	5' tcactcTGTCGTCAGGTAGCCt 3'
rno-miR-138-1-3p	Rbbp5	146	-29.93	2	21	1498	1521	3' ggGAC-CACA-ACACUUCAUCGGc 5'	:|| |||| ||||||||:||:	5' ccTTGTGTGTGTGTGAAGTGGCTt 3'
rno-miR-138-1-3p	Rbm38	144	-18.68	2	21	379	400	3' ggGACCACAACACUUCAUCGGc 5'	|||| ||| ||||||:	5' gaCTGGCTTTGGTCAGTAGCTc 3'
rno-miR-138-1-3p	Rbpj	145	-12.85	2	10	1223	1244	3' gggaccacaacacUUCAUCGGc 5'	||||||||	5' aataaactgaactAAGTAGCCa 3'
rno-miR-138-1-3p	Rbpj	141	-12.51	2	10	2428	2449	3' gggaccacaacacUUCAUCGGc 5'	:|||||||	5' gactcctaccacaGAGTAGCCt 3'
rno-miR-138-1-3p	Rcl1	143	-17.54	2	16	244	265	3' gggaccaCAACACUUCAUCGGc 5'	|| | |||||:|||	5' agaggccGTCGGGAAGTGGCCa 3'
rno-miR-138-1-3p	Reck	144	-24.28	2	21	557	576	3' ggGACCACAACACUUCAUCGGc 5'	|| ||| || |:|||:|||	5' gcCT-GTGATG-GGAGTGGCCc 3'
rno-miR-138-1-3p	Ret	158	-14.78	2	20	151	174	3' gggACCACAA--CACUUCAUCGGc 5'	|||| || | ||||||||	5' aagTGGTTTTACTTCAAGTAGCCa 3'
rno-miR-138-1-3p	Rexo4	154	-19.86	2	20	579	601	3' gggACCACAACA-CUUCAUCGGc 5'	||||||| | ||||||:|	5' gtaTGGTGTTCTCCAAGTAGTCc 3'
rno-miR-138-1-3p	Rfc1	143	-27.09	2	21	98	124	3' ggGACCACA-----ACACUUCAUCGGc 5'	:|||||| |||:|||:|||	5' gtTTGGTGTAGCACAGTGGAGTGGCCt 3'
rno-miR-138-1-3p	Rfx7	140	-11.03	2	9	634	655	3' gggaccacaacacuUCAUCGGc 5'	|||||||	5' ttaagaggaaaaccAGTAGCCa 3'
rno-miR-138-1-3p	RGD1303271	146	-20.52	2	15	234	255	3' gggaccacAACACUUCAUCGGc 5'	||| ||||||||:	5' gcaaagccTTGGGAAGTAGCTt 3'
rno-miR-138-1-3p	RGD1304610	143	-19.37	3	20	659	680	3' gggACCACAACACUUCAUCGgc 5'	||| |||| ||||||	5' tggTGGGGTTGACTAGTAGCag 3'
rno-miR-138-1-3p	RGD1304694	144	-27.06	2	21	938	960	3' ggGA-CCACAACAC-UUCAUCGGc 5'	|| |||| ||| ||||:|||	5' tcCTCGGTG-GGTGCAAGTGGCCa 3'
rno-miR-138-1-3p	RGD1305464	155	-22.51	2	21	7	29	3' ggGACCACAAC-ACUUCAUCGGc 5'	|| ||| || ||::||||||	5' caCTAGTGCTGTTGGGGTAGCCa 3'
rno-miR-138-1-3p	RGD1305680	141	-20.09	2	21	1007	1031	3' ggGACCACAACACU----UCAUCGGc 5'	|| || |||||| |||||:|	5' gcCTCGT-TTGTGAGAATAGTAGTCa 3'
rno-miR-138-1-3p	RGD1306233	144	-15.41	3	17	260	281	3' gggaccACAACACUUCAUCGgc 5'	||| |||||||||	5' catattTGTCCTGAAGTAGCag 3'
rno-miR-138-1-3p	RGD1306502	161	-19.73	2	20	1722	1745	3' gggAC-CAC-AACACUUCAUCGGc 5'	|| ||| ||| ||||||||	5' gcaTGTGTGCCTGTCAAGTAGCCa 3'
rno-miR-138-1-3p	RGD1306924	141	-14.82	2	19	649	673	3' gggaCCACAA---CACUUCAUCGGc 5'	||| || || |:||||||	5' ctaaGGTTTTATGGTCAGGTAGCCt 3'
rno-miR-138-1-3p	RGD1307235	151	-15.69	2	20	1373	1394	3' gggACCACAACACUUCAUCGGc 5'	| | ||||| :|||||:|	5' tagTAGAGTTGTTGAGTAGTCt 3'
rno-miR-138-1-3p	RGD1307443	147	-19.08	2	18	587	607	3' gggacCACAACACUUCAUCGGc 5'	|||||| |:||||||	5' gttaaGTGTTG-AAGGTAGCCt 3'
rno-miR-138-1-3p	RGD1307461	140	-23.75	2	19	834	854	3' gggaCCACAACACUUCAUCGGc 5'	| || || |:|||:|||	5' ccgaGATG-TGGGGAGTGGCCg 3'
rno-miR-138-1-3p	RGD1307704	161	-18.57	2	21	215	236	3' ggGACCACAAC-ACUUCAUCGGc 5'	|| || ||| |||||||||	5' agCT-GTTTTGCAGAAGTAGCCc 3'
rno-miR-138-1-3p	RGD1308048	142	-16.5	2	21	378	398	3' ggGACCACAACACUUCAUCGGc 5'	:| ||||| |||| |||||	5' gtTTTGTGTT-TGAATTAGCCa 3'
rno-miR-138-1-3p	RGD1308165	148	-21.27	2	21	57	76	3' ggGACCACAACACUUCAUCGGc 5'	|| | || || |||||||	5' gcCT-GCGTGGT-CAGTAGCCc 3'
rno-miR-138-1-3p	RGD1308722	141	-12.68	2	10	858	879	3' gggaccacaacacUUCAUCGGc 5'	:|||||||	5' tcatcttcccagcGAGTAGCCa 3'
rno-miR-138-1-3p	RGD1308874	147	-29.83	2	21	106	128	3' ggGACCACAACAC-UUCAUCGGc 5'	:||| |||| |||||||:	5' ccTTGGAAGTGTGCAAGTAGCTg 3'
rno-miR-138-1-3p	RGD1309095	140	-17.2	3	13	847	868	3' gggaccacaaCACUUCAUCGgc 5'	||||||||||	5' gtttttaagaGTGAAGTAGCag 3'
rno-miR-138-1-3p	RGD1309313	142	-17.53	2	11	457	478	3' gggaccacaacaCUUCAUCGGc 5'	| |||||||	5' gccctagtcccaGCAGTAGCCt 3'
rno-miR-138-1-3p	RGD1310352	146	-16.7	2	21	1109	1129	3' ggGACCACAACACUUCAUCGGc 5'	|| ||||| | :||||||	5' tgCT-GTGTTTTATGGTAGCCt 3'
rno-miR-138-1-3p	RGD1310552	149	-25.55	2	18	81	102	3' gggacCACAACACUUCAUCGGc 5'	||| |||:|||:|||	5' agccaGTGGAGTGGAGTGGCCc 3'
rno-miR-138-1-3p	RGD1310553	157	-10.38	2	20	2672	2692	3' gggACCACAACACUUCAUCGGc 5'	| || || | ||||||||	5' gtaTAGTCTT-TTAAGTAGCCt 3'
rno-miR-138-1-3p	RGD1310553	151	-10.59	2	20	2265	2286	3' gggACCACAACACUUCAUCGGc 5'	| || || :|||||||	5' tcaTAGTTTTCCAGAGTAGCCt 3'
rno-miR-138-1-3p	RGD1310553	143	-19.04	3	20	1792	1813	3' gggACCACAACACUUCAUCGgc 5'	|| |||| ||||||||:	5' gagTGTTGTTTTGAAGTAGTgt 3'
rno-miR-138-1-3p	RGD1310727	140	-16.48	2	9	140	161	3' gggaccacaacacuUCAUCGGc 5'	|||||||	5' ttcctgtaccctccAGTAGCCa 3'
rno-miR-138-1-3p	RGD1311021	154	-23.95	2	20	27	51	3' gggACCACA---ACACUUCAUCGGc 5'	|||||| || |||||:|||	5' tgaTGGTGTCACTGAGAAGTGGCCa 3'
rno-miR-138-1-3p	RGD1311267	151	-26.51	2	19	936	955	3' gggaCCACAACACUUCAUCGGc 5'	||||| ||||||||:|	5' ataaGGTGT--TGAAGTAGTCg 3'
rno-miR-138-1-3p	RGD1311493	141	-23.62	2	21	1810	1831	3' ggGACCACAAC-ACUUCAUCGGc 5'	||||| | | |:||||||:	5' ctCTGGT-TGGAGGGAGTAGCTt 3'
rno-miR-138-1-3p	RGD1311493	140	-24.27	2	17	1744	1765	3' gggaccACAACACUUCAUCGGc 5'	| | | ||||||||:	5' tatcccTTTGGAGAAGTAGCTg 3'
rno-miR-138-1-3p	RGD1311703	147	-20.01	2	21	301	324	3' ggGACCACAAC--ACUUCAUCGGc 5'	|||| ||| || :||||||	5' caCTGGCTTTGTCTGTGGTAGCCc 3'
rno-miR-138-1-3p	RGD1559600	146	-11.95	2	19	33	54	3' gggaCCACAACACUUCAUCGGc 5'	| || | :|||||||	5' cagaGATGCCATTGAGTAGCCa 3'
rno-miR-138-1-3p	RGD1559786	142	-16.32	2	20	376	401	3' gggACCACAACACU----UCAUCGGc 5'	|| || ||||| ||||||:	5' gagTGCTGCTGTGAACCCAGTAGCTc 3'
rno-miR-138-1-3p	RGD1560455	160	-11.6	2	21	1004	1025	3' ggGACCACAACACUUCAUCGGc 5'	|| | || | ||||||||	5' gtCTACTTTTTTCAAGTAGCCt 3'
rno-miR-138-1-3p	RGD1560691	155	-28.48	2	18	2676	2696	3' gggacCACAACACUUCAUCGGc 5'	|||||||| :||||||	5' tcccaGTGTTGTG-GGTAGCCt 3'
rno-miR-138-1-3p	RGD1560888	149	-18.56	2	14	105	126	3' gggaccacaACACUUCAUCGGc 5'	||| |||||||	5' tcttcacaaTGTCCAGTAGCCg 3'
rno-miR-138-1-3p	RGD1561065	145	-22.46	3	14	1110	1131	3' gggaccacaACACUUCAUCGgc 5'	|||||||||||	5' atgcccatcTGTGAAGTAGCag 3'
rno-miR-138-1-3p	RGD1561065	143	-12.12	2	12	2293	2314	3' gggaccacaacACUUCAUCGGc 5'	| :|||||||	5' tataaataggtTAGAGTAGCCt 3'
rno-miR-138-1-3p	RGD1561149	146	-28.41	2	21	1607	1627	3' ggGACCACAACACUUCAUCGGc 5'	| || || | ||||||||:	5' gtCAGG-GTGGGGAAGTAGCTg 3'
rno-miR-138-1-3p	RGD1561241	144	-11.87	2	21	269	290	3' ggGACCACAACACUUCAUCGGc 5'	| ||| || | |||||:|	5' ttCAGGTTTTCTTTAGTAGTCa 3'
rno-miR-138-1-3p	RGD1561444	140	-24.88	2	21	277	296	3' ggGACCACAACACUUCAUCGGc 5'	|||| || ||:||||||	5' ctCTGG-ACTG-GAGGTAGCCa 3'
rno-miR-138-1-3p	RGD1561557	160	-22.32	2	21	345	366	3' ggGACCACAACACUUCAUCGGc 5'	||| | || ||||||||:|	5' ccCTGCTCTTCTGAAGTAGTCa 3'
rno-miR-138-1-3p	RGD1562012	155	-22.53	2	18	824	844	3' gggacCACAACACUUCAUCGGc 5'	||| | |||||||||	5' cccaaGTG-GGCGAAGTAGCCt 3'
rno-miR-138-1-3p	RGD1562012	147	-15.73	2	16	84	105	3' gggaccaCAACACUUCAUCGGc 5'	||| ||:|||||:|	5' agcatcaGTTCTGGAGTAGTCt 3'
rno-miR-138-1-3p	RGD1562174	145	-11.59	2	10	219	240	3' gggaccacaacacUUCAUCGGc 5'	||||||||	5' aggaaccaaaagaAAGTAGCCt 3'
rno-miR-138-1-3p	RGD1562218	142	-9.93	2	11	2753	2774	3' gggaccacaacaCUUCAUCGGc 5'	| |||||||	5' aattagcatgcaGCAGTAGCCt 3'
rno-miR-138-1-3p	RGD1562218	140	-18.14	2	21	1539	1558	3' ggGACCACAACACUUCAUCGGc 5'	|| | | || |||||:|||	5' tgCT-GAGATG-GAAGTGGCCt 3'
rno-miR-138-1-3p	RGD1562291	145	-19.09	3	18	753	774	3' gggacCACAACACUUCAUCGgc 5'	|||| ||:||||||	5' ggagaGTGTCATGGAGTAGCag 3'
rno-miR-138-1-3p	RGD1562416	140	-14.75	2	9	695	716	3' gggaccacaacacuUCAUCGGc 5'	|||||||	5' ctcccctctcccttAGTAGCCt 3'
rno-miR-138-1-3p	RGD1562420	141	-23.28	2	21	6	30	3' ggGACCACA-ACA-CU-UCAUCGGc 5'	|| |||| ||| | |||:|||	5' ccCTCGTGTCTGTACATAGTGGCCa 3'
rno-miR-138-1-3p	RGD1562608	148	-18.05	2	14	372	394	3' gggaccacaACAC-UUCAUCGGc 5'	| || ||||||||	5' ccccttaaaTATGAAAGTAGCCa 3'
rno-miR-138-1-3p	RGD1562638	141	-15.65	3	18	1169	1190	3' gggacCACAACACUUCAUCGgc 5'	||| | ||||||||	5' atgatGTGCAGAGAAGTAGCaa 3'
rno-miR-138-1-3p	RGD1562726	141	-15.6	2	10	1199	1220	3' gggaccacaacacUUCAUCGGc 5'	:|||||||	5' cttcactttcacaGAGTAGCCg 3'
rno-miR-138-1-3p	RGD1562963	151	-16.43	2	21	281	303	3' ggGACCACAACAC-UUCAUCGGc 5'	| | || | | ||||||||	5' gtCGGTTGAAGGGAAAGTAGCCt 3'
rno-miR-138-1-3p	RGD1563073	147	-23.26	2	18	491	511	3' gggacCACAACACUUCAUCGGc 5'	| |||||| |||:|||	5' acagaGGGTTGTG-AGTGGCCa 3'
rno-miR-138-1-3p	RGD1563217	140	-9.6	2	9	1	21	3' gggaccacaacacuUCAUCGGc 5'	|||||||	5' -tgatcagagcaacAGTAGCCc 3'
rno-miR-138-1-3p	RGD1563684	154	-15.82	2	15	1232	1253	3' gggaccacAACACUUCAUCGGc 5'	||| | |||||||	5' tgcatagcTTGGGCAGTAGCCc 3'
rno-miR-138-1-3p	RGD1564174	141	-13.16	2	10	359	380	3' gggaccacaacacUUCAUCGGc 5'	:|||||||	5' atgctccacagcaGAGTAGCCa 3'
rno-miR-138-1-3p	RGD1564387	151	-18.62	2	13	230	252	3' gggaccacaaCAC-UUCAUCGGc 5'	||| ||||||||	5' tctgattaccGTGCAAGTAGCCa 3'
rno-miR-138-1-3p	RGD1564541	163	-16.51	2	20	943	964	3' gggACCACAACACUUCAUCGGc 5'	||| ||| ||||||||	5' ataTGGCCTTGATAAGTAGCCc 3'
rno-miR-138-1-3p	RGD1564943	143	-18.06	2	21	1232	1255	3' ggGAC--CACAACACUUCAUCGGc 5'	||| ||| :|||||||	5' ctCTGAAGTGACTCAGAGTAGCCt 3'
rno-miR-138-1-3p	RGD1565043	147	-15.93	2	18	905	925	3' gggacCACAACACUUCAUCGGc 5'	| | | || |||||||	5' gtcaaGGGGTATG-AGTAGCCc 3'
rno-miR-138-1-3p	RGD1565411	140	-13.52	2	9	95	116	3' gggaccacaacacuUCAUCGGc 5'	|||||||	5' tccactttccctacAGTAGCCc 3'
rno-miR-138-1-3p	RGD1565432	140	-14.72	2	21	347	366	3' ggGACCACAACACUUCAUCGGc 5'	||| | || | |:||||||	5' ctCTGCT-TTAT-AGGTAGCCc 3'
rno-miR-138-1-3p	RGD1565591	146	-23.07	2	21	717	737	3' ggGACCACAACACUUCAUCGGc 5'	|| ||||| | |||:|||	5' tcCT-GTGTTAGGCAGTGGCCa 3'
rno-miR-138-1-3p	RGD1566130	152	-13.36	2	21	276	297	3' ggGACCACAACACUUCAUCGGc 5'	| | | | || |||||||	5' ctCAGAGGATCTGCAGTAGCCa 3'
rno-miR-138-1-3p	Rgl1	145	-10.66	2	10	814	835	3' gggaccacaacacUUCAUCGGc 5'	||||||||	5' gtcattaccgcatAAGTAGCCt 3'
rno-miR-138-1-3p	Rhobtb3	144	-20.05	3	17	1430	1451	3' gggaccACAACACUUCAUCGgc 5'	|| | |||||||||	5' actattTGGTATGAAGTAGCaa 3'
rno-miR-138-1-3p	Rhoc	162	-18.17	2	21	340	360	3' ggGACCACAACACUUCAUCGGc 5'	||| | ||| | |||||||	5' ttCTGCT-TTGGGTAGTAGCCt 3'
rno-miR-138-1-3p	Rhot1	140	-11	2	9	176	197	3' gggaccacaacacuUCAUCGGc 5'	|||||||	5' aaagaaaacatcttAGTAGCCa 3'
rno-miR-138-1-3p	Ric8a	166	-28.1	2	21	658	681	3' ggGAC-CACA-ACACUUCAUCGGc 5'	||| | | ||||||||||||	5' gaCTGTATATCTGTGAAGTAGCCg 3'
rno-miR-138-1-3p	Rimbp3	140	-18.83	2	17	7	28	3' gggaccACAACACUUCAUCGGc 5'	||| | | |||:|||	5' ctccctTGTAGGGTAGTGGCCt 3'
rno-miR-138-1-3p	Ripk1	145	-12.99	2	10	1636	1657	3' gggaccacaacacUUCAUCGGc 5'	||||||||	5' gttttaagggaaaAAGTAGCCa 3'
rno-miR-138-1-3p	Ripk1	143	-19.29	3	21	1668	1693	3' ggGACCACAAC----ACUUCAUCGgc 5'	||||| ||| || ||||||	5' agCTGGTTTTGGAATTGCAGTAGCaa 3'
rno-miR-138-1-3p	Rlf	140	-18.02	2	21	124	145	3' ggGACCACAACACUUCAUCGGc 5'	:||| | || ||||||:	5' taTTGGCGGCGTCCAGTAGCTc 3'
rno-miR-138-1-3p	Rnf138	163	-26.75	2	20	1868	1889	3' gggACCACAACACUUCAUCGGc 5'	||||| || |||||||	5' cagTGGTGGTGGTTAGTAGCCg 3'
rno-miR-138-1-3p	Rnf152	146	-18.91	2	20	3470	3493	3' gggACCACAA--CACUUCAUCGGc 5'	|| |||| || :|||:|||	5' ccgTGTTGTTTAGTAGAGTGGCCa 3'
rno-miR-138-1-3p	Rnf20	140	-11.76	2	9	109	130	3' gggaccacaacacuUCAUCGGc 5'	|||||||	5' aggttctcttcgccAGTAGCCa 3'
rno-miR-138-1-3p	Rpe	140	-10.35	2	9	991	1012	3' gggaccacaacacuUCAUCGGc 5'	|||||||	5' aagtaaggctccacAGTAGCCt 3'
rno-miR-138-1-3p	Rpl19	141	-23.28	2	21	6	30	3' ggGACCACA-ACA-CU-UCAUCGGc 5'	|| |||| ||| | |||:|||	5' ccCTCGTGTCTGTACATAGTGGCCa 3'
rno-miR-138-1-3p	Rprm	140	-9.73	2	9	382	403	3' gggaccacaacacuUCAUCGGc 5'	|||||||	5' tattcagaggcaacAGTAGCCc 3'
rno-miR-138-1-3p	Rsbn1	142	-24.46	3	21	2458	2478	3' ggGACCACAACACUUCAUCGgc 5'	||||| |||| ||||||:	5' ctCTGGT-TTGTAAAGTAGTgg 3'
rno-miR-138-1-3p	RT1-T24-3	140	-17.18	2	9	204	225	3' gggaccacaacacuUCAUCGGc 5'	|||||||	5' gcactaggcccatcAGTAGCCg 3'
rno-miR-138-1-3p	Runx1t1	152	-21.43	2	21	288	309	3' ggGACCACAACACUUCAUCGGc 5'	||| | || | |||||||:	5' ccCTGTTATTTTCAAGTAGCTg 3'
rno-miR-138-1-3p	Rxrg	155	-18.07	2	21	229	252	3' ggGACCACAACACU--UCAUCGGc 5'	| | | ||| || |||||||	5' ggCAGTTCTTGGGAAGAGTAGCCa 3'
rno-miR-138-1-3p	Rybp	145	-14.58	2	15	477	500	3' gggaccacAAC--ACUUCAUCGGc 5'	||| | :|||||||	5' ttaacagcTTGAATTGAGTAGCCa 3'
rno-miR-138-1-3p	Sacm1l	140	-14.27	2	21	893	914	3' ggGACCACAACACUUCAUCGGc 5'	:| ||| | |:||||||	5' atTTAGTGCTTCCAGGTAGCCa 3'
rno-miR-138-1-3p	Samd5	149	-14.14	2	21	424	446	3' ggGACCACAACACU--UCAUCGGc 5'	|| || | | || |||||||	5' ctCT-GTCTCGAGAACAGTAGCCt 3'
rno-miR-138-1-3p	Saps1	140	-13.86	2	17	677	698	3' gggaccACAACACUUCAUCGGc 5'	|| || ||||:|||	5' cagcacTGCTGCCAAGTGGCCt 3'
rno-miR-138-1-3p	Sarm1	140	-13.97	2	9	740	761	3' gggaccacaacacuUCAUCGGc 5'	|||||||	5' gccccaacattaccAGTAGCCt 3'
rno-miR-138-1-3p	Scn5a	140	-25.91	2	9	198	219	3' gggaccacaacacuUCAUCGGc 5'	|||||||	5' gcctggcacaccctAGTAGCCg 3'
rno-miR-138-1-3p	Scn9a	148	-15.42	2	14	3188	3210	3' gggaccacaACAC-UUCAUCGGc 5'	|| | ||||||||	5' cccagaaaaTGAGTAAGTAGCCa 3'
rno-miR-138-1-3p	Sdc1	155	-23.72	2	21	795	817	3' ggGACC-ACAACACUUCAUCGGc 5'	| || || ||:|||||||	5' ccCAGGATGCCATGGAGTAGCCa 3'
rno-miR-138-1-3p	Sdpr	140	-9.42	2	9	124	145	3' gggaccacaacacuUCAUCGGc 5'	|||||||	5' atcactaaccatacAGTAGCCt 3'
rno-miR-138-1-3p	Sec63	156	-19.38	2	17	1624	1645	3' gggaccACAACACUUCAUCGGc 5'	| | ||||||||||	5' ttcctaTTTACTGAAGTAGCCa 3'
rno-miR-138-1-3p	Sema4d	142	-25.12	2	20	43	70	3' gggACCACAAC------ACUUCAUCGGc 5'	| |||||| | |||||||	5' gtgTTGTGTTGAACCTATTCAGTAGCCg 3'
rno-miR-138-1-3p	Sema5a	152	-29.24	2	21	203	225	3' ggGACCACAACACUUCA-UCGGc 5'	:|||||||| ||||| ||||	5' atTTGGTGTTGCGAAGTGAGCCa 3'
rno-miR-138-1-3p	Sema6d	145	-10.91	2	10	93	114	3' gggaccacaacacUUCAUCGGc 5'	||||||||	5' ttttaagagaaacAAGTAGCCa 3'
rno-miR-138-1-3p	Sep15	155	-15.46	2	12	157	178	3' gggaccacaacACUUCAUCGGc 5'	||||||||||	5' tgattcgaagcTGAAGTAGCCc 3'
rno-miR-138-1-3p	Sephs1	140	-12.92	2	9	515	536	3' gggaccacaacacuUCAUCGGc 5'	|||||||	5' gcatttcttcacccAGTAGCCc 3'
rno-miR-138-1-3p	Serpina5	145	-10.61	2	10	495	516	3' gggaccacaacacUUCAUCGGc 5'	||||||||	5' caatgatcagaacAAGTAGCCc 3'
rno-miR-138-1-3p	Serpina6	141	-10.92	2	10	96	117	3' gggaccacaacacUUCAUCGGc 5'	:|||||||	5' gataactagcaatGAGTAGCCc 3'
rno-miR-138-1-3p	Serpina9	140	-15.16	2	9	185	206	3' gggaccacaacacuUCAUCGGc 5'	|||||||	5' ctggtcacccttccAGTAGCCc 3'
rno-miR-138-1-3p	Serpinb12	163	-21.64	2	17	182	204	3' gggaccACAA-CACUUCAUCGGc 5'	|||| ||||||||||	5' tccaccTGTTAATGAAGTAGCCt 3'
rno-miR-138-1-3p	Serpinh1	158	-21.88	2	20	19	42	3' gggACC--ACAACACUUCAUCGGc 5'	||| || | |||||||||	5' gcgTGGCATGGCGGGAAGTAGCCa 3'
rno-miR-138-1-3p	Setd2	142	-12.35	2	11	193	214	3' gggaccacaacaCUUCAUCGGc 5'	| |||||||	5' aggccatcagagGCAGTAGCCt 3'
rno-miR-138-1-3p	Sf3b1	143	-12.64	2	21	490	513	3' ggGACCACAACACU--UCAUCGGc 5'	:|| || || || ||||||:	5' tgTTGATGATGAGAAGAGTAGCTt 3'
rno-miR-138-1-3p	Sf3b1	140	-15.95	2	15	799	819	3' gggaccacAACACUUCAUCGGc 5'	|||| |||||||:	5' cagtttatTTGT-AAGTAGCTg 3'
rno-miR-138-1-3p	Sfrp4	140	-20.56	2	21	205	224	3' ggGACCACAACACUUCAUCGGc 5'	|| ||||| | |||:|||	5' acCT-GTGTTCAG-AGTGGCCt 3'
rno-miR-138-1-3p	Sh3glb2	145	-25.02	2	21	400	421	3' ggGACC-ACAACACUUCAUCGGc 5'	|||| || ||| |||:|||	5' ctCTGGCTG-GGTGCAGTGGCCa 3'
rno-miR-138-1-3p	Shc2	151	-21	2	17	442	464	3' gggaccAC-AACACUUCAUCGGc 5'	|| | | |:|||||||	5' gatgccTGCTAGGGGAGTAGCCt 3'
rno-miR-138-1-3p	Shisa3	144	-23.92	3	17	310	331	3' gggaccACAACACUUCAUCGgc 5'	||| |||||||||	5' ttttccTGTGTTGAAGTAGCac 3'
rno-miR-138-1-3p	Shisa5	166	-23.47	2	21	313	333	3' ggGACCACAACACUUCAUCGGc 5'	||| | ||| |:|||||||	5' tcCTGCT-TTGGGGAGTAGCCa 3'
rno-miR-138-1-3p	Shisa7	144	-14.2	2	17	2056	2075	3' gggaccACAACACUUCAUCGGc 5'	|||| | |||||||	5' tcttcaTGTT-T-CAGTAGCCa 3'
rno-miR-138-1-3p	Shroom2	142	-15.61	2	11	1521	1542	3' gggaccacaacaCUUCAUCGGc 5'	| |||||||	5' ttccctctctaaGCAGTAGCCa 3'
rno-miR-138-1-3p	Siae	141	-16.4	2	18	528	549	3' gggacCACAACACUUCAUCGGc 5'	||| | |:|||:|||	5' gctaaGTGCTAAGGAGTGGCCt 3'
rno-miR-138-1-3p	siat7D	142	-18.28	2	16	226	248	3' gggaccaCAAC-ACUUCAUCGGc 5'	|||| | ||||:|||	5' cctccagGTTGTTTAAGTGGCCt 3'
rno-miR-138-1-3p	Siglec1	142	-17.21	3	21	700	723	3' ggGACCACAAC-ACU-UCAUCGgc 5'	:|| ||||| || ||||||	5' ttTTGATGTTGAAGAGAGTAGCat 3'
rno-miR-138-1-3p	Sirt3	140	-18.2	2	18	120	143	3' gggacCACA--ACACUUCAUCGGc 5'	|||| || | |||||:|	5' aacatGTGTCCTGGGCAGTAGTCc 3'
rno-miR-138-1-3p	Sirt4	155	-23.69	2	21	214	236	3' ggGACCACAAC-ACUUCAUCGGc 5'	||| | ||| ||:||||||:	5' agCTGCTCTTGATGGAGTAGCTg 3'
rno-miR-138-1-3p	Slc12a5	142	-14.96	2	11	1421	1442	3' gggaccacaacaCUUCAUCGGc 5'	| |||||||	5' atattcttccagGTAGTAGCCa 3'
rno-miR-138-1-3p	Slc19a1	152	-25.89	2	21	456	477	3' ggGACCACAACACUUCAUCGGc 5'	| || | ||||:||||||	5' ccCAGGGCTAGTGAGGTAGCCc 3'
rno-miR-138-1-3p	Slc19a2	143	-13.17	2	13	1381	1403	3' gggaccacaaCACU-UCAUCGGc 5'	|| | |||||||	5' gagaactaagGTCAGAGTAGCCt 3'
rno-miR-138-1-3p	Slc22a3	145	-13.51	2	10	1094	1115	3' gggaccacaacacUUCAUCGGc 5'	||||||||	5' tgtggacaggcaaAAGTAGCCt 3'
rno-miR-138-1-3p	Slc22a5	143	-26.5	2	21	882	904	3' ggGACC-ACAACACUUCAUCGGc 5'	|||| || |||| ||| |||	5' ccCTGGCTGGTGTGCAGTTGCCa 3'
rno-miR-138-1-3p	Slc24a2	143	-13.84	3	20	6540	6561	3' gggACCACAACACUUCAUCGgc 5'	|||| | | |||||||	5' gcaTGGTTTCTTTAAGTAGCaa 3'
rno-miR-138-1-3p	Slc25a23	140	-12.4	2	9	904	925	3' gggaccacaacacuUCAUCGGc 5'	|||||||	5' catgtctagctcccAGTAGCCc 3'
rno-miR-138-1-3p	Slc25a30	144	-29.28	3	21	371	392	3' ggGACCACAACACUUCAUCGgc 5'	|||| || |||:|||||:	5' ccCTGGAGTGGTGGAGTAGTag 3'
rno-miR-138-1-3p	Slc25a36	153	-23.04	2	21	2875	2900	3' ggGACC-ACA-A--CACUUCAUCGGc 5'	|||| ||| | || |||||||	5' acCTGGATGTCTCCTTGCAGTAGCCt 3'
rno-miR-138-1-3p	Slc26a1	154	-14.26	2	17	1200	1223	3' gggaccACA-AC-ACUUCAUCGGc 5'	||| || | ||||||||	5' ccagaaTGTATGATAAAGTAGCCc 3'
rno-miR-138-1-3p	Slc2a8	140	-18.63	2	13	48	69	3' gggaccacaaCACUUCAUCGGc 5'	|||:|||:|||	5' ttcaaaaggaGTGGAGTGGCCt 3'
rno-miR-138-1-3p	Slc35b3	146	-21.91	3	19	312	333	3' gggaCCACAACACUUCAUCGgc 5'	|||| ||| ||||||	5' gcacGGTGCCGTGTAGTAGCac 3'
rno-miR-138-1-3p	Slc35b4	145	-19.11	2	21	21	42	3' ggGACCACAACACU-UCAUCGGc 5'	|| || ||||| |||:|||	5' cgCT-GTTATGTGAGAGTGGCCt 3'
rno-miR-138-1-3p	Slc39a7	143	-16.56	2	13	217	239	3' gggaccacaaCACU-UCAUCGGc 5'	| || |||||||	5' agaaggctggGAGACAGTAGCCt 3'
rno-miR-138-1-3p	Slc6a15	146	-19.17	2	19	611	632	3' gggaCCACAACACUUCAUCGGc 5'	||| | ||:|||:|||	5' cgagGGTTTCCTGGAGTGGCCa 3'
rno-miR-138-1-3p	Slc6a8	145	-17.94	2	10	1256	1277	3' gggaccacaacacUUCAUCGGc 5'	||||||||	5' gcctgaaacagccAAGTAGCCa 3'
rno-miR-138-1-3p	Slc7a1	151	-22.73	2	21	3384	3406	3' ggGACCACAAC-ACUUCAUCGGc 5'	| ||| | | |||:||||||	5' tcCAGGTATGGTTGAGGTAGCCa 3'
rno-miR-138-1-3p	Slc7a5	147	-18.68	3	21	455	477	3' ggGACCACAA-CACUUCAUCGgc 5'	||| |||| || ||||||	5' gaCTGTTGTTCGTTCAGTAGCac 3'
rno-miR-138-1-3p	Slc7a8	144	-11.12	2	13	884	905	3' gggaccacaaCACUUCAUCGGc 5'	| | |||||||	5' gtgaaagaaaGAGCAGTAGCCc 3'
rno-miR-138-1-3p	Slc9a5	142	-22	2	21	99	123	3' ggGACC--ACAACACU-UCAUCGGc 5'	|||| || |||: |||:|||	5' ggCTGGACTGAAGTGGCAGTGGCCt 3'
rno-miR-138-1-3p	Slfn2	155	-19.49	2	20	91	112	3' gggACCACAACACUUCAUCGGc 5'	|| | | ||||:||||||	5' acaTGTTTTGGTGAGGTAGCCt 3'
rno-miR-138-1-3p	Slitrk6	140	-15.77	3	19	956	980	3' gggaCCACAACA-CU--UCAUCGgc 5'	| |||||| || ||||||	5' gataGATGTTGTAGACTAGTAGCaa 3'
rno-miR-138-1-3p	Smcr8	147	-16.74	2	17	228	250	3' gggaccACAA-CACUUCAUCGGc 5'	|||| | ||||||||:	5' ttcgttTGTTAGGGAAGTAGCTc 3'
rno-miR-138-1-3p	Snap23	165	-20.34	2	20	659	679	3' gggACCACAACACUUCAUCGGc 5'	||| ||||| |||||||	5' tcaTGGAGTTGT-CAGTAGCCt 3'
rno-miR-138-1-3p	Snapc2	140	-12.89	2	9	120	141	3' gggaccacaacacuUCAUCGGc 5'	|||||||	5' acactgcatgcactAGTAGCCt 3'
rno-miR-138-1-3p	Snx33	147	-16.09	2	20	168	190	3' gggACC-AC-AACACUUCAUCGGc 5'	||| || || | |||||||	5' agaTGGATGAATG-GCAGTAGCCc 3'
rno-miR-138-1-3p	Snx6	148	-13	2	17	194	215	3' gggaccACAACACUUCAUCGGc 5'	| | | ||||||||	5' cctctcTTTCTTTAAGTAGCCt 3'
rno-miR-138-1-3p	Snx6	142	-21.9	2	21	579	599	3' ggGACCACAACACUUCAUCGGc 5'	|||| || |::||||||	5' ctCTGGAATT-CGGGGTAGCCa 3'
rno-miR-138-1-3p	Socs5	140	-14.08	2	9	1102	1123	3' gggaccacaacacuUCAUCGGc 5'	|||||||	5' gacctttgcactacAGTAGCCa 3'
rno-miR-138-1-3p	Sorbs3	140	-19.47	3	21	33	54	3' ggGACCACAACACUUCAUCGgc 5'	| |||| | | ||||||	5' atCGGGTGGGGAGCAGTAGCac 3'
rno-miR-138-1-3p	Sos2	162	-17	2	20	1222	1244	3' gggACCAC-AACACUUCAUCGGc 5'	|| || | ||| |||||||	5' ttgTGCTGATAGTGCAGTAGCCc 3'
rno-miR-138-1-3p	Sos2	162	-20.3	2	15	1240	1261	3' gggaccacAACACUUCAUCGGc 5'	|||| ||||||||	5' agcccccaTTGTAAAGTAGCCa 3'
rno-miR-138-1-3p	Spag6	140	-11.12	2	9	127	148	3' gggaccacaacacuUCAUCGGc 5'	|||||||	5' aatagtttaaggttAGTAGCCt 3'
rno-miR-138-1-3p	Speg	159	-21.82	2	21	678	700	3' ggGACCACAACACU-UCAUCGGc 5'	|||| || || |||||||	5' gtCTGGGAATGAGAGAGTAGCCa 3'
rno-miR-138-1-3p	Spn	142	-21.76	2	21	413	437	3' ggGACCA-CAAC--ACUUCAUCGGc 5'	| ||| | || ||::||||||	5' ggCCGGTAGCTGCTTGGGGTAGCCt 3'
rno-miR-138-1-3p	Spon2	140	-13.29	2	9	1	19	3' gggaccacaacacuUCAUCGGc 5'	|||||||	5' ---acccagaccccAGTAGCCa 3'
rno-miR-138-1-3p	Spryd4	146	-23.17	3	21	365	385	3' ggGACCACAACACUUCAUCGgc 5'	||||| | | |:||||||	5' ctCTGGT-TGGAGGAGTAGCag 3'
rno-miR-138-1-3p	Sptbn2	162	-19	2	19	553	574	3' gggaCCACAACACUUCAUCGGc 5'	| |||| |:|||||||	5' gtgaGTTGTTCAGGAGTAGCCa 3'
rno-miR-138-1-3p	Srms	155	-16.74	2	17	431	453	3' gggaccACAAC-ACUUCAUCGGc 5'	||| | | ||||||||	5' tcttacTGTGGATTAAGTAGCCa 3'
rno-miR-138-1-3p	Ssr3	148	-12.7	2	19	984	1007	3' gggaCCACAAC-ACU-UCAUCGGc 5'	||| | | | | |||||||	5' taggGGTCTAGCTAAGAGTAGCCt 3'
rno-miR-138-1-3p	Sstr3	158	-18.76	2	21	1226	1246	3' ggGACCACAACACUUCAUCGGc 5'	|| || || |:|||||||	5' ggCT-GTCATGGGGAGTAGCCa 3'
rno-miR-138-1-3p	St6gal1	143	-21.04	2	17	2033	2055	3' gggaccACAAC-ACUUCAUCGGc 5'	||| | ||:|||:|||	5' taggacTGTGGATGGAGTGGCCa 3'
rno-miR-138-1-3p	St6gal1	142	-13.41	2	17	2303	2323	3' gggaccACAACACUUCAUCGGc 5'	|| || |||||||	5' gggcacTGACGT-CAGTAGCCa 3'
rno-miR-138-1-3p	Stam	140	-10.35	2	9	622	643	3' gggaccacaacacuUCAUCGGc 5'	|||||||	5' tcacaccagcatacAGTAGCCa 3'
rno-miR-138-1-3p	ste2	142	-21.86	2	21	7	33	3' ggGACCACA-AC----ACUUCAUCGGc 5'	|| |||| || ||:|||||:|	5' tcCTTGTGTCTGAAATTGGAGTAGTCt 3'
rno-miR-138-1-3p	Steap2	141	-20.96	2	10	1234	1255	3' gggaccacaacacUUCAUCGGc 5'	:|||||||	5' gcctggaaacccaGAGTAGCCc 3'
rno-miR-138-1-3p	Stil	141	-24.71	2	20	16	40	3' gggACCACA-ACACU--UCAUCGGc 5'	|||||| ||||| | |||||	5' ttgTGGTGTGTGTGAGGACTAGCCc 3'
rno-miR-138-1-3p	Stk10	149	-22.58	2	21	1041	1062	3' ggGACCACAAC-ACUUCAUCGGc 5'	:||| |||| | |:||||||	5' ctTTGG-GTTGCTCAGGTAGCCt 3'
rno-miR-138-1-3p	Stk38	146	-19.99	2	18	119	140	3' gggacCAC-AACACUUCAUCGGc 5'	||| ||||| |||:|||	5' gagatGTGATTGTG-AGTGGCCa 3'
rno-miR-138-1-3p	Stom	154	-13.92	2	19	413	434	3' gggaCCACAACACUUCAUCGGc 5'	||| | | :|||||||	5' atagGGTTTCTTAGAGTAGCCt 3'
rno-miR-138-1-3p	Stx16	142	-22.87	2	21	21	41	3' ggGACCACAACACUUCAUCGGc 5'	||| || ||:||||||:	5' cgCTGCTG-CATGGAGTAGCTg 3'
rno-miR-138-1-3p	Stx6	153	-29.58	2	21	1238	1257	3' ggGACCACAACACUUCAUCGGc 5'	||||| | |||||||||:	5' gcCTGGTAT--TGAAGTAGCTg 3'
rno-miR-138-1-3p	Stx6	143	-24.02	2	21	1137	1155	3' ggGACCACAACACUUCAUCGGc 5'	:||| || |||||||||:	5' caTTGG-GT--TGAAGTAGCTg 3'
rno-miR-138-1-3p	Styxl1	152	-25.51	2	21	64	83	3' ggGACCACAACACUUCAUCGGc 5'	|||| ||| ||:|||||:|	5' gtCTGG-GTT-TGGAGTAGTCc 3'
rno-miR-138-1-3p	Sult1e1	142	-21.86	2	21	7	33	3' ggGACCACA-AC----ACUUCAUCGGc 5'	|| |||| || ||:|||||:|	5' tcCTTGTGTCTGAAATTGGAGTAGTCt 3'
rno-miR-138-1-3p	Supt6h	140	-16.53	2	13	254	275	3' gggaccacaaCACUUCAUCGGc 5'	|||:|||||:|	5' gagagcaaagGTGGAGTAGTCt 3'
rno-miR-138-1-3p	Surf4	145	-14.77	2	15	1572	1594	3' gggaccacAAC-ACUUCAUCGGc 5'	||| | |||||||	5' tgcatgccTTGCAGCAGTAGCCc 3'
rno-miR-138-1-3p	Suv39h2	159	-20.17	2	17	2421	2444	3' gggaccACAAC--ACUUCAUCGGc 5'	| ||| ||||||||||	5' tgtaacTCTTGAATGAAGTAGCCa 3'
rno-miR-138-1-3p	Sv2a	142	-17.61	3	19	426	447	3' gggaCCACAACACUUCAUCGgc 5'	| || || |:||||||	5' caagGATGCTGGGGAGTAGCaa 3'
rno-miR-138-1-3p	Sycp2	147	-10.64	2	12	50	71	3' gggaccacaacACUUCAUCGGc 5'	| ||||||||	5' tgaaaaaataaTAAAGTAGCCt 3'
rno-miR-138-1-3p	Synpo2	142	-16.2	2	17	22	42	3' gggaccACAACACUUCAUCGGc 5'	|||||| |||:|||	5' gaatttTGTTGT-TAGTGGCCt 3'
rno-miR-138-1-3p	Syt15	140	-18.69	2	17	404	425	3' gggaccACAACACUUCAUCGGc 5'	||||||| || ||||	5' gagaccTGTTGTGCAGCAGCCc 3'
rno-miR-138-1-3p	Syt17	142	-10.92	2	11	666	687	3' gggaccacaacaCUUCAUCGGc 5'	| |||||||	5' ttagacagcaagGCAGTAGCCa 3'
rno-miR-138-1-3p	Syt2	149	-19.08	2	20	1141	1164	3' gggACCA-CAAC-ACUUCAUCGGc 5'	|| | || | |:|||||||	5' cagTGATGGTAGCCGGAGTAGCCc 3'
rno-miR-138-1-3p	Syvn1	154	-19.25	2	21	17	37	3' ggGACCACAACACUUCAUCGGc 5'	||| | | || |||||||	5' ccCTGCTCTCTTG-AGTAGCCc 3'
rno-miR-138-1-3p	Taf1	150	-13.72	2	20	552	575	3' gggACCACAACAC--UUCAUCGGc 5'	|||| || || |||||||:	5' ataTGGTTTTATGCAAAGTAGCTa 3'
rno-miR-138-1-3p	Tagln	145	-19.4	2	18	238	259	3' gggacCACAACACUUCAUCGGc 5'	||| |||:||||||	5' gagaaGTGGGCTGAGGTAGCCt 3'
rno-miR-138-1-3p	Tapbp	140	-11.36	2	9	35	56	3' gggaccacaacacuUCAUCGGc 5'	|||||||	5' gtccaaacgactccAGTAGCCc 3'
rno-miR-138-1-3p	Tbc1d2	142	-11.92	2	11	491	512	3' gggaccacaacaCUUCAUCGGc 5'	| |||||||	5' ctgtctttccagGCAGTAGCCc 3'
rno-miR-138-1-3p	Tbc1d22b	140	-19.3	2	9	1770	1791	3' gggaccacaacacuUCAUCGGc 5'	|||||||	5' gccccctgtgcctcAGTAGCCt 3'
rno-miR-138-1-3p	Tbck	146	-17.05	2	21	2962	2982	3' ggGACCACAACACUUCAUCGGc 5'	|| | | ||| ||||:|||	5' gaCTAG-GATGTAAAGTGGCCa 3'
rno-miR-138-1-3p	Tbl1xr1	146	-15.31	2	21	1410	1430	3' ggGACCACAACACUUCAUCGGc 5'	||| |||| | |||||:|	5' tgCTGCTGTT-TCCAGTAGTCa 3'
rno-miR-138-1-3p	Tbx22	147	-12.39	2	12	965	986	3' gggaccacaacACUUCAUCGGc 5'	| ||||||||	5' agaaacctaaaTCAAGTAGCCt 3'
rno-miR-138-1-3p	Tbxa2r	140	-21.83	2	17	361	382	3' gggaccACAACACUUCAUCGGc 5'	||| || ||||||:	5' acccacTGTGGTCCAGTAGCTg 3'
rno-miR-138-1-3p	Tcf7	144	-21.73	2	21	807	828	3' ggGACCACAACACUUCAUCGGc 5'	|| || || | |||||:|	5' acCTACTGGTGGGCAGTAGTCa 3'
rno-miR-138-1-3p	Tcfap2a	153	-17.82	2	19	1254	1276	3' gggaCCACAACACU-UCAUCGGc 5'	| || | ||: |||||||	5' ttgaGTTGCTCTGGCAGTAGCCt 3'
rno-miR-138-1-3p	Tcp11l1	146	-14.82	2	15	1594	1615	3' gggaccacAACACUUCAUCGGc 5'	|| ||||||:|||	5' tatagacaTTTTGAAGTGGCCa 3'
rno-miR-138-1-3p	Tek	147	-17.63	2	17	796	818	3' gggaccACAAC-ACUUCAUCGGc 5'	||||| || :||||||	5' atttatTGTTGATGCGGTAGCCa 3'
rno-miR-138-1-3p	Tex2	149	-22.69	2	21	72	93	3' ggGACCACAACA-CUUCAUCGGc 5'	|| ||| ||| |::||||||	5' atCT-GTGCTGTGGGGGTAGCCt 3'
rno-miR-138-1-3p	Tex2	145	-15.93	2	10	536	557	3' gggaccacaacacUUCAUCGGc 5'	||||||||	5' gcattttggaagcAAGTAGCCa 3'
rno-miR-138-1-3p	Tfeb	156	-29.61	2	17	79	100	3' gggaccACAACACUUCAUCGGc 5'	|| |||||||||||:	5' tgcactTGGTGTGAAGTAGCTg 3'
rno-miR-138-1-3p	Tff3	142	-17.93	2	21	41	61	3' ggGACCACAACACUUCAUCGGc 5'	:|| || || | |||:|||	5' tcTTGCTGATG-GTAGTGGCCc 3'
rno-miR-138-1-3p	Thoc3	144	-19.67	2	18	211	233	3' gggacCACAACAC-UUCAUCGGc 5'	||| || | ||||:|||	5' tgcacGTGGTGAGCAAGTGGCCc 3'
rno-miR-138-1-3p	Thoc3	140	-18.87	2	9	503	524	3' gggaccacaacacuUCAUCGGc 5'	|||||||	5' aaaggccaaggatcAGTAGCCg 3'
rno-miR-138-1-3p	Timm44	146	-20.24	2	21	252	272	3' ggGACCACAACACUUCAUCGGc 5'	||| ||| || |||||:|	5' gcCTGCCGTTTTG-AGTAGTCc 3'
rno-miR-138-1-3p	Timp2	144	-16.2	2	21	452	473	3' ggGACCACAACACUUCAUCGGc 5'	|| | || || |||:|||	5' ccCTCATTTTCTGCAGTGGCCa 3'
rno-miR-138-1-3p	Tipin	158	-13.71	2	17	3	23	3' gggaccACAACACUUCAUCGGc 5'	|||| | ||||||||	5' cagaaaTGTTCT-AAGTAGCCa 3'
rno-miR-138-1-3p	Tmcc1	177	-23.06	2	18	585	606	3' gggacCACAACACUUCAUCGGc 5'	|| |||||||||||||	5' gttcaGTATTGTGAAGTAGCCc 3'
rno-miR-138-1-3p	Tmeff1	140	-13.36	2	17	851	872	3' gggaccACAACACUUCAUCGGc 5'	||| || ||||||:	5' cgaatcTGTCCTGCAGTAGCTc 3'
rno-miR-138-1-3p	Tmem127	142	-16.64	2	21	290	310	3' ggGACCACAACACUUCAUCGGc 5'	:|| || || | |||:|||	5' ggTTGCTGCTG-GTAGTGGCCa 3'
rno-miR-138-1-3p	Tmem168	154	-21.62	2	21	296	316	3' ggGACCACAACACUUCAUCGGc 5'	|| ||| | ||||||:|||	5' gtCT-GTGCTCTGAAGTGGCCa 3'
rno-miR-138-1-3p	Tmem181	147	-17.42	2	17	163	185	3' gggaccACAACACU-UCAUCGGc 5'	|| ||||| :||||||	5' tgtattTGCTGTGAGGGTAGCCc 3'
rno-miR-138-1-3p	Tmem185a	140	-13.9	2	20	381	402	3' gggACCAC-AACACUUCAUCGGc 5'	|| || || | |:||||||	5' ctgTGCTGCTTAT-AGGTAGCCa 3'
rno-miR-138-1-3p	Tmem2	149	-19.36	2	21	1377	1396	3' ggGACCACAACACUUCAUCGGc 5'	| |||| | :|||||||	5' ggCAGGTG--GATGAGTAGCCa 3'
rno-miR-138-1-3p	Tmem214	152	-16.72	2	13	342	363	3' gggaccacaaCACUUCAUCGGc 5'	| |||||||||	5' tccagaagaaGGGAAGTAGCCt 3'
rno-miR-138-1-3p	Tmem229b	140	-14.99	2	9	492	513	3' gggaccacaacacuUCAUCGGc 5'	|||||||	5' cctgagagagacccAGTAGCCa 3'
rno-miR-138-1-3p	Tmem55a	154	-24.89	2	21	96	116	3' ggGACCACAACACUUCAUCGGc 5'	||||| |||| |||||:|	5' tcCTGGT-TTGTATAGTAGTCt 3'
rno-miR-138-1-3p	Tmem57	154	-18.06	2	21	239	259	3' ggGACCACAACACUUCAUCGGc 5'	|| | | | | ||||||||	5' ttCTTG-GATTTCAAGTAGCCa 3'
rno-miR-138-1-3p	Tmem57	148	-14.97	2	13	407	428	3' gggaccacaaCACUUCAUCGGc 5'	| |:|||||||	5' gtgcgagaggGCGGAGTAGCCc 3'
rno-miR-138-1-3p	Tmem57	140	-22.5	2	18	897	919	3' gggacCACAACA-CUUCAUCGGc 5'	||| | | |:|||:|||	5' aagccGTGGTCTAGGAGTGGCCc 3'
rno-miR-138-1-3p	Tmprss5	145	-14.16	2	10	449	470	3' gggaccacaacacUUCAUCGGc 5'	||||||||	5' ttgaggtaactctAAGTAGCCc 3'
rno-miR-138-1-3p	Tnfaip1	141	-15.04	2	20	1305	1325	3' gggACCACAACACUUCAUCGGc 5'	|| |||| | |||:|||	5' ccaTGCTGTT-AGCAGTGGCCa 3'
rno-miR-138-1-3p	Tnfaip2	141	-14.7	2	10	297	318	3' gggaccacaacacUUCAUCGGc 5'	:|||||||	5' cttttaacggcctGAGTAGCCc 3'
rno-miR-138-1-3p	Tnfrsf18	142	-20.73	2	15	1	18	3' gggaccacAACACUUCAUCGGc 5'	| | :|||||||	5' ----gtccTGGATGAGTAGCCt 3'
rno-miR-138-1-3p	Tnmd	146	-14.8	2	21	72	96	3' ggGACCACAAC--A-CUUCAUCGGc 5'	||| ||| | ||||||||	5' ttCTGCATTTGCCTCCAAGTAGCCt 3'
rno-miR-138-1-3p	Tom1l2	144	-19.63	2	21	199	220	3' ggGACCACAACACUUCAUCGGc 5'	||| |||| |||||:|	5' tcCTGCCGTTGCACAGTAGTCt 3'
rno-miR-138-1-3p	Tp63	155	-15.04	2	21	927	949	3' ggGACCACAACACU-UCAUCGGc 5'	:|| ||| | | |||||||	5' atTTGCTGTCATTAGAGTAGCCt 3'
rno-miR-138-1-3p	Tp63	151	-21.98	2	18	2336	2362	3' gggacCACAA----CAC-UUCAUCGGc 5'	||||| ||| :|||||||	5' caccaGTGTTAAGCGTGTGAGTAGCCa 3'
rno-miR-138-1-3p	Tp63	155	-15.04	2	21	1208	1230	3' ggGACCACAACACU-UCAUCGGc 5'	:|| ||| | | |||||||	5' atTTGCTGTCATTAGAGTAGCCt 3'
rno-miR-138-1-3p	Tp63	151	-21.98	2	18	2617	2643	3' gggacCACAA----CAC-UUCAUCGGc 5'	||||| ||| :|||||||	5' caccaGTGTTAAGCGTGTGAGTAGCCa 3'
rno-miR-138-1-3p	Tpbpa	140	-13.12	2	9	136	157	3' gggaccacaacacuUCAUCGGc 5'	|||||||	5' ggcctccccaactcAGTAGCCa 3'
rno-miR-138-1-3p	Tpcn2	152	-12.07	2	21	154	175	3' ggGACCACAACACUUCAUCGGc 5'	| | || | | |||||||	5' tgCAGCTGCTCAGCAGTAGCCa 3'
rno-miR-138-1-3p	Traf3	148	-25.15	2	20	2864	2885	3' gggACC-ACAACACUUCAUCGGc 5'	||| | ||||| ||||||:	5' ctgTGGTTTTTGTG-AGTAGCTg 3'
rno-miR-138-1-3p	Traf3	148	-15.77	2	17	3176	3197	3' gggaccACAACACUUCAUCGGc 5'	| | | ||||||||	5' catcccTTTCCTAAAGTAGCCt 3'
rno-miR-138-1-3p	Traf3	140	-22.32	2	21	1849	1872	3' ggGACCACAA-CAC--UUCAUCGGc 5'	|||| ||| ||| :||||||	5' agCTGG-GTTGGTGCCCGGTAGCCc 3'
rno-miR-138-1-3p	Trim2	145	-13.64	2	10	3164	3185	3' gggaccacaacacUUCAUCGGc 5'	||||||||	5' aatttgaggcaatAAGTAGCCc 3'
rno-miR-138-1-3p	Trim8	155	-22.49	2	20	204	225	3' gggACCACAACACUUCAUCGGc 5'	|| || || |||||:|||	5' aggTGATGGTGGGAAGTGGCCt 3'
rno-miR-138-1-3p	Trove2	150	-10.92	2	15	930	951	3' gggaccacAACACUUCAUCGGc 5'	|| | :|||||||	5' tcaaacaaTTTTAGAGTAGCCa 3'
rno-miR-138-1-3p	Trove2	145	-11.12	2	10	275	296	3' gggaccacaacacUUCAUCGGc 5'	||||||||	5' agatacaaagtctAAGTAGCCt 3'
rno-miR-138-1-3p	Trpc1	142	-15.31	2	21	841	868	3' ggGAC-CACAACACU-----UCAUCGGc 5'	||| | || ||| |||||||	5' gtCTGTGAATTTTGAAAAATAGTAGCCa 3'
rno-miR-138-1-3p	Trpv5	147	-13.52	2	17	1024	1046	3' gggaccACAACACU-UCAUCGGc 5'	|||| | |||||||	5' ccataaTGTTTCCATAGTAGCCt 3'
rno-miR-138-1-3p	Tsc22d2	145	-11.27	2	10	71	92	3' gggaccacaacacUUCAUCGGc 5'	||||||||	5' ctttatagaaagcAAGTAGCCa 3'
rno-miR-138-1-3p	Tshr	153	-17.77	2	20	1548	1571	3' gggAC-CACAACACU-UCAUCGGc 5'	|| ||| ||| |||||||	5' acaTGTGTGCCCTGATAGTAGCCt 3'
rno-miR-138-1-3p	Tshr	145	-15.24	2	14	1919	1940	3' gggaccacaACACUUCAUCGGc 5'	| | :|||||||	5' aatatttcaTCTCGAGTAGCCg 3'
rno-miR-138-1-3p	Tshr	141	-13.85	2	10	2130	2151	3' gggaccacaacacUUCAUCGGc 5'	:|||||||	5' gtggcactcaggaGAGTAGCCc 3'
rno-miR-138-1-3p	Tspan1	142	-20.15	2	16	205	227	3' gggaccaCA-ACACUUCAUCGGc 5'	|| | |||:||||||	5' ggtcccaGTCTCTGAGGTAGCCa 3'
rno-miR-138-1-3p	Tspan18	155	-14.2	2	20	1917	1938	3' gggACCACAACACUUCAUCGGc 5'	| ||| | ||||||||	5' ttgTAGTGCTCCAAAGTAGCCc 3'
rno-miR-138-1-3p	Tssk4	150	-17.6	2	17	88	108	3' gggaccACAACACUUCAUCGGc 5'	|| || | |||||||	5' ccagccTG-TGCGTAGTAGCCc 3'
rno-miR-138-1-3p	Ttc38	143	-29.18	2	21	58	82	3' ggGACCA---CAACACUUCAUCGGc 5'	||||| | | ||||||||:	5' gcCTGGTTGGGATAGGAAGTAGCTg 3'
rno-miR-138-1-3p	Ttpal	145	-13.92	2	16	3182	3202	3' gggaccaCAACACUUCAUCGGc 5'	||| | |||||||	5' tcaggcaGTT-AGTAGTAGCCa 3'
rno-miR-138-1-3p	Tubb5	141	-11.26	2	10	330	351	3' gggaccacaacacUUCAUCGGc 5'	:|||||||	5' taagaactcaagaGAGTAGCCa 3'
rno-miR-138-1-3p	Tuft1	171	-23.17	2	20	1227	1248	3' gggACCACAACACUUCAUCGGc 5'	|||||| || |||||||	5' gtgTGGTGTGGTCTAGTAGCCt 3'
rno-miR-138-1-3p	Tusc2	142	-19.11	2	21	832	855	3' ggGACCAC-AACAC-UUCAUCGGc 5'	|||| | | ||| ||||||:	5' aaCTGGGGCTGGTGCCAGTAGCTa 3'
rno-miR-138-1-3p	Twsg1	162	-26.68	2	21	883	903	3' ggGACCACAACACUUCAUCGGc 5'	|||| | | |||||||||	5' acCTGG-ATGGAGAAGTAGCCa 3'
rno-miR-138-1-3p	Txlna	140	-10.86	2	9	608	629	3' gggaccacaacacuUCAUCGGc 5'	|||||||	5' gcttctcagctctcAGTAGCCt 3'
rno-miR-138-1-3p	Txlnb	150	-18.6	2	19	1072	1093	3' gggaCCACAACACUUCAUCGGc 5'	| || | | |||||||	5' aggaGCTGGTAGGCAGTAGCCa 3'
rno-miR-138-1-3p	Ube2b	144	-20.25	2	19	825	845	3' gggaCCACAACACUUCAUCGGc 5'	|||||| | |||:|||	5' ccgcGGTGTT-AGCAGTGGCCa 3'
rno-miR-138-1-3p	Ube2cbp	144	-18.09	3	20	279	298	3' gggACCACAACACUUCAUCGgc 5'	| ||||||| ||||||	5' tcgTAGTGTTGT--AGTAGCag 3'
rno-miR-138-1-3p	Ube2i	140	-13.18	2	9	80	101	3' gggaccacaacacuUCAUCGGc 5'	|||||||	5' tccgtacagttactAGTAGCCt 3'
rno-miR-138-1-3p	Ube2k	146	-26.21	3	15	358	379	3' gggaccacAACACUUCAUCGgc 5'	|||||:||||||	5' gccctaccTTGTGGAGTAGCat 3'
rno-miR-138-1-3p	Ube2m	156	-27.23	2	19	73	93	3' gggaCCACAACACUUCAUCGGc 5'	|||| ||||::||||||	5' gtagGGTG-TGTGGGGTAGCCt 3'
rno-miR-138-1-3p	Ube2o	146	-16.81	2	12	392	414	3' gggaccacaacACU-UCAUCGGc 5'	||| |||||||	5' cccttccagctTGACAGTAGCCt 3'
rno-miR-138-1-3p	Ube2q2	140	-10.08	2	9	218	239	3' gggaccacaacacuUCAUCGGc 5'	|||||||	5' tgataagtacacacAGTAGCCa 3'
rno-miR-138-1-3p	Ube2v2	146	-11.3	2	21	754	777	3' ggGACCACA-AC-ACUUCAUCGGc 5'	:|| | | || | |||||||	5' caTTGATATATGCTATAGTAGCCa 3'
rno-miR-138-1-3p	Ube3a	144	-11.43	2	17	696	715	3' gggaccACAACACUUCAUCGGc 5'	|||| | |||||||	5' atgaacTGTT-T-CAGTAGCCa 3'
rno-miR-138-1-3p	Ube4a	162	-18.33	2	15	2285	2306	3' gggaccacAACACUUCAUCGGc 5'	||| |||||||||	5' agggccgcTTGAGAAGTAGCCt 3'
rno-miR-138-1-3p	Ubn2	146	-17.14	2	20	482	504	3' gggACCACAACACU-UCAUCGGc 5'	|| | | || |||||||	5' tgaTGCTCTCCAGACAGTAGCCg 3'
rno-miR-138-1-3p	Ubox5	144	-15.94	2	20	1323	1342	3' gggACCACAACACUUCAUCGGc 5'	|||| | :|||||||	5' ccaTGGTCT--CCGAGTAGCCt 3'
rno-miR-138-1-3p	Ubox5	143	-30.38	2	21	1467	1490	3' ggGACCACAAC--ACUUCAUCGGc 5'	||||||| | ||:|| ||||	5' ccCTGGTGTGGGCTGGAGAAGCCc 3'
rno-miR-138-1-3p	Ubr7	143	-23.19	2	21	1282	1304	3' ggGACCACAAC-ACUUCAUCGGc 5'	|||| | ||||||||:|	5' tcCTGGACAAGATGAAGTAGTCt 3'
rno-miR-138-1-3p	Ubxn2b	149	-13.96	2	14	333	354	3' gggaccacaACACUUCAUCGGc 5'	||| |||||||	5' atgtagcagTGTCCAGTAGCCa 3'
rno-miR-138-1-3p	Ugdh	144	-19.67	2	21	24	45	3' ggGACCACAACACUUCAUCGGc 5'	:|||| || ::||||||	5' atTTGGTACTGCAGGGTAGCCa 3'
rno-miR-138-1-3p	Ulk2	156	-25.99	3	21	2621	2642	3' ggGACCACAACACUUCAUCGgc 5'	|||| |||||||||||	5' agCTGGCCCTGTGAAGTAGCat 3'
rno-miR-138-1-3p	Ulk2	142	-19.93	2	19	1580	1601	3' gggaCCACAACACUUCAUCGGc 5'	|||| | ||||||:||:	5' ttggGGTGATATGAAGTGGCTt 3'
rno-miR-138-1-3p	Uqcrh	148	-16.74	2	21	100	121	3' ggGACCACAACACUUCAUCGGc 5'	:|| | ||| |||||||:	5' ccTTGATTTTGGCAAGTAGCTt 3'
rno-miR-138-1-3p	Ush1c	148	-21.57	2	21	181	202	3' ggGACCACAACACUUCAUCGGc 5'	||| |||| ||:|||:|:|	5' aaCTGCTGTTCTGGAGTGGTCt 3'
rno-miR-138-1-3p	Usp20	140	-18.87	2	21	880	901	3' ggGACCACAACACUUCAUCGGc 5'	:||| || ||||| ||||	5' gtTTGGAGTCCTGAAGAAGCCt 3'
rno-miR-138-1-3p	Usp35	142	-27.13	3	21	354	379	3' ggGACCACA--ACAC--UUCAUCGgc 5'	:|||||| |||| ||||||	5' gcTTGGTGTCCTGTGTTCAGTAGCac 3'
rno-miR-138-1-3p	Uvrag	140	-16.83	2	20	497	518	3' gggACCA-CAACACUUCAUCGGc 5'	|||| | || | |||:|||	5' aagTGGTAGCTG-GCAGTGGCCa 3'
rno-miR-138-1-3p	Vash2	142	-18.96	2	21	2577	2600	3' ggGACCAC-AACAC-UUCAUCGGc 5'	|| || |||| ||||:|||	5' tgCTACTGACTGTGAAAGTGGCCt 3'
rno-miR-138-1-3p	Vat1	142	-19.28	2	21	831	851	3' ggGACCACAACACUUCAUCGGc 5'	| || || | |:||||||:	5' gtCGGGGGTAG-GGAGTAGCTc 3'
rno-miR-138-1-3p	Vegfb	152	-14.29	2	21	210	231	3' ggGACCACAACACUUCAUCGGc 5'	|| | | | ||||||||	5' gcCTCGAATACTTAAGTAGCCc 3'
rno-miR-138-1-3p	Vipr1	147	-22.51	2	20	1651	1672	3' gggACCACAACACUUCAUCGGc 5'	|| || ||||||| ||||	5' gtaTGCTGGTGTGAAGAAGCCa 3'
rno-miR-138-1-3p	Vom2r31	147	-23.54	2	21	1176	1198	3' ggGACC-ACAACACUUCAUCGGc 5'	:||| || | |||||||:|	5' tcTTGGAGGTGGGGAAGTAGTCa 3'
rno-miR-138-1-3p	Vps18	142	-20.47	2	17	296	316	3' gggaccACAACACUUCAUCGGc 5'	|| || |||||||	5' ttcaccTGGACTG-AGTAGCCc 3'
rno-miR-138-1-3p	Vps52	153	-20.46	2	18	465	486	3' gggacCACAACACUUCAUCGGc 5'	| || | | |||||||	5' agcaaGGGTGGGGTAGTAGCCc 3'
rno-miR-138-1-3p	Vwa5a	147	-11.76	2	12	3082	3103	3' gggaccacaacACUUCAUCGGc 5'	|| |||||||	5' gtcagcattcaTGCAGTAGCCa 3'
rno-miR-138-1-3p	Vwc2	150	-11.11	2	16	629	651	3' gggaccaCAACACU-UCAUCGGc 5'	||| | | |||||||	5' tgtttcaGTTCTCATAGTAGCCc 3'
rno-miR-138-1-3p	Vwc2	141	-17.79	3	21	1587	1609	3' ggGACCACAA--CACUUCAUCGgc 5'	:||| ||| || |||||||	5' ttTTGG-GTTAGGTAAAGTAGCaa 3'
rno-miR-138-1-3p	Wasl	145	-21.25	2	21	2223	2244	3' ggGACCAC-AACACUUCAUCGGc 5'	|| ||| |||| :||||||	5' ctCT-GTGCTTGTCTGGTAGCCt 3'
rno-miR-138-1-3p	Wdfy1	142	-12.8	2	14	307	328	3' gggaccacaACACU-UCAUCGGc 5'	|| || |||||||	5' tcatgtaaaTG-GACAGTAGCCa 3'
rno-miR-138-1-3p	Wdfy3	140	-18	2	21	2606	2627	3' ggGACCACAACACUUCAUCGGc 5'	:|| | | ||||||||:	5' ttTTGAAGACGAGAAGTAGCTg 3'
rno-miR-138-1-3p	Wdr45	140	-17.6	2	9	16	37	3' gggaccacaacacuUCAUCGGc 5'	|||||||	5' tactaggaacctacAGTAGCCg 3'
rno-miR-138-1-3p	Whsc1	147	-12.5	2	12	1197	1218	3' gggaccacaacACUUCAUCGGc 5'	| ||||||||	5' ggcaaaaaggtTAAAGTAGCCt 3'
rno-miR-138-1-3p	Wiz	144	-15.35	2	13	237	258	3' gggaccacaaCACUUCAUCGGc 5'	| | |||||||	5' ggtccagcagGGGCAGTAGCCa 3'
rno-miR-138-1-3p	Wnt10b	148	-27.06	2	21	162	183	3' ggGACCACAACACUUCAUCGGc 5'	|| ||| | |:|||:|||	5' gcCTTTTGTGGGGGAGTGGCCg 3'
rno-miR-138-1-3p	Wnt3	142	-20.15	2	19	1569	1590	3' gggaCCACAACACUUCAUCGGc 5'	|| || | |||||||:	5' ctggGGCGTATTCAAGTAGCTg 3'
rno-miR-138-1-3p	Wrb	143	-14.84	2	18	853	876	3' gggacCAC-AAC-ACUUCAUCGGc 5'	||| || | |||||||	5' ctagcGTGACTGTTCCAGTAGCCa 3'
rno-miR-138-1-3p	Yipf2	153	-14.9	2	21	568	589	3' ggGACCACAACACU-UCAUCGGc 5'	|| || ||| | |||||||	5' ctCTTGT-TTGCCACAGTAGCCc 3'
rno-miR-138-1-3p	Zbed3	140	-13.41	2	9	41	62	3' gggaccacaacacuUCAUCGGc 5'	|||||||	5' agtgcccccaagtcAGTAGCCt 3'
rno-miR-138-1-3p	Zbp1	141	-22.29	3	14	253	274	3' gggaccacaACACUUCAUCGgc 5'	||||:||||||	5' atgggcgaaTGTGGAGTAGCac 3'
rno-miR-138-1-3p	Zbtb9	140	-17.56	2	9	564	585	3' gggaccacaacacuUCAUCGGc 5'	|||||||	5' tgagttcaaatcccAGTAGCCg 3'
rno-miR-138-1-3p	Zdhhc23	143	-13.67	2	21	176	198	3' ggGACCACAACACU-UCAUCGGc 5'	||| | | | |||||||	5' taCTGAAGCAGCAAGAGTAGCCa 3'
rno-miR-138-1-3p	Zdhhc3	148	-17.47	2	21	933	954	3' ggGACCACAACACUUCAUCGGc 5'	:| | |||| |:||||||	5' tcTTAGAGTTGCCAGGTAGCCc 3'
rno-miR-138-1-3p	Zfhx4	142	-15.63	2	19	392	413	3' gggaCCACAACACUUCAUCGGc 5'	||||| | ||||||:	5' gttaGGTGTAATTCAGTAGCTt 3'
rno-miR-138-1-3p	Zfp192	143	-16.74	2	21	5647	5669	3' ggGACC-ACAACACUUCAUCGGc 5'	|||| | |||| || |||||	5' atCTGGCTCTTGTAAATTAGCCt 3'
rno-miR-138-1-3p	Zfp212	148	-20.95	2	17	755	776	3' gggaccACAACACUUCAUCGGc 5'	|| | |||||||||:	5' aaagacTGGTTTGAAGTAGCTa 3'
rno-miR-138-1-3p	Zfp212	148	-20.95	2	17	739	760	3' gggaccACAACACUUCAUCGGc 5'	|| | |||||||||:	5' aaagacTGGTTTGAAGTAGCTa 3'
rno-miR-138-1-3p	Zfp275	147	-13.08	2	17	2014	2036	3' gggaccACAA-CACUUCAUCGGc 5'	|||| | |||||||	5' gagcttTGTTCTTCCAGTAGCCt 3'
rno-miR-138-1-3p	Zfp318	146	-13.64	2	13	475	495	3' gggaccacaaCACUUCAUCGGc 5'	||| |||||||	5' ggaatgcagcGTG-AGTAGCCc 3'
rno-miR-138-1-3p	Zfp329	152	-20.48	2	18	2983	3007	3' gggacCACAACACU---UCAUCGGc 5'	|| ||||| |||||||	5' aataaGTTCTGTGAGTGAGTAGCCa 3'
rno-miR-138-1-3p	Zfp329	145	-12.97	2	10	1651	1672	3' gggaccacaacacUUCAUCGGc 5'	||||||||	5' agacatcctacaaAAGTAGCCc 3'
rno-miR-138-1-3p	Zfp772	145	-17.67	2	20	252	276	3' gggACCAC-AACA--CUUCAUCGGc 5'	||| | |||| |:||||||:	5' gtgTGGAGATTGTAGGGAGTAGCTt 3'
rno-miR-138-1-3p	Zfp828	158	-21.5	2	19	44	62	3' gggaCCACAACACUUCAUCGGc 5'	||||||| |||||||	5' cttaGGTGTTG---AGTAGCCt 3'
rno-miR-138-1-3p	Zfp91	147	-12.34	2	12	2549	2570	3' gggaccacaacACUUCAUCGGc 5'	| ||||||||	5' tttgttaccgtTTAAGTAGCCa 3'
rno-miR-138-1-3p	Zfx	154	-15.44	2	21	1062	1082	3' ggGACCACAACACUUCAUCGGc 5'	|| | | || ||||||||	5' agCT-GAGATGACAAGTAGCCa 3'
rno-miR-138-1-3p	Zmat3	151	-18.74	2	21	280	302	3' ggGACCACAAC-ACUUCAUCGGc 5'	||||| | | |||||||	5' ttCTGGTTAAGCAGTAGTAGCCt 3'
rno-miR-138-1-3p	Znf282	147	-19.85	2	18	1451	1471	3' gggacCACAACACUUCAUCGGc 5'	|||| ||| :||||||	5' agggaGTGTGGTG-GGTAGCCa 3'
rno-miR-138-1-3p	Znf282	144	-18.47	2	21	1081	1101	3' ggGACCACAACACU-UCAUCGGc 5'	||| | || | |||||||	5' gaCTG--GCTGCCAGAGTAGCCa 3'
rno-miR-138-1-3p	Znf292	182	-29.13	2	20	835	858	3' gggACCAC--AACACUUCAUCGGc 5'	||||| |||||||||||||	5' aggTGGTGGTTTGTGAAGTAGCCc 3'
rno-miR-138-1-3p	Znf512	155	-17.99	2	20	1085	1107	3' gggACCACAA-CAC-UUCAUCGGc 5'	||| ||| | | ||||||||	5' acaTGG-GTTAGCGTAAGTAGCCt 3'
rno-miR-138-1-3p	Znf512	145	-22.64	2	21	1715	1740	3' ggGAC-CACAAC-ACU--UCAUCGGc 5'	||| ||| | || |||||||	5' ccCTGCATGTGGCAGATGAGTAGCCa 3'
rno-miR-138-1-3p	Znf512b	150	-21.85	2	20	653	675	3' gggACCA-CAACACUUCAUCGGc 5'	|||| | |||:||||||:	5' gtgTGGTCATGGTGGAGTAGCTa 3'
rno-miR-138-1-3p	Znf512b	147	-20.74	3	21	1331	1354	3' ggGACCACAACAC--UUCAUCGgc 5'	:|| || |||| |||||||	5' tcTTGTTGCTGTGACAAGTAGCaa 3'
rno-miR-138-1-3p	Znf593	150	-19.08	2	11	826	847	3' gggaccacaacaCUUCAUCGGc 5'	|||||||||	5' ctgtagcacccgGAAGTAGCCa 3'
rno-miR-138-1-3p	Znf667	146	-16.98	2	20	717	739	3' gggACC-ACAACACUUCAUCGGc 5'	||| ||| | ||||||:|	5' cagTGGATGTGGAAAAGTAGTCa 3'
rno-miR-138-1-3p	Znf787	145	-17.46	2	18	513	534	3' gggacCACAACACUUCAUCGGc 5'	| | ||||||||||:	5' tagcaGAGGAGTGAAGTAGCTt 3'
rno-miR-138-1-3p	Znf787	144	-20.72	3	21	499	518	3' ggGACCACAACACUUCAUCGgc 5'	|| ||||| || ||||||	5' tcCT-GTGTT-TGCAGTAGCag 3'
rno-miR-138-5p	Aak1	142	-20.32	2	11	1544	1566	3' gccggacuaagugUUGUGGUCGa 5'	| |||||||	5' taagtggcggggaACCACCAGCa 3'
rno-miR-138-5p	Aak1	140	-15.95	3	18	3224	3247	3' gccggaCUA-AGUGUUGUGGUCga 5'	||| | ||| ||||||	5' tttttaGATATAACATCACCAGat 3'
rno-miR-138-5p	Aanat	142	-22.35	2	21	523	544	3' gccGGACUAAGUGUUGUGGUCGa 5'	||||: || | :||||||	5' tatCCTGG-TCCCCCTACCAGCc 3'
rno-miR-138-5p	Aass	147	-23.43	2	21	256	279	3' gccGGACU-AAGUGUUGUGGUCGa 5'	||||| ||:| ||:||||	5' tttCCTGAGGACATATCATCAGCa 3'
rno-miR-138-5p	Abcb9	146	-20.14	2	21	79	100	3' gccGGACUAAGUGUUGUGGUCGa 5'	|| | ||| |||||||	5' gctCCCCAGGCAC-CCACCAGCt 3'
rno-miR-138-5p	Abcd2	142	-18.43	2	11	304	326	3' gccggacuaagugUUGUGGUCGa 5'	::|||||||	5' acaagacagcaggGGCACCAGCt 3'
rno-miR-138-5p	Abcd3	140	-22.54	2	22	726	750	3' gcCGGACUAAGUGU--UGUGGUCGa 5'	||||| | |||| ::|||||:	5' gtGCCTGCTCCACATGGTACCAGTc 3'
rno-miR-138-5p	Abce1	148	-22.17	2	18	825	848	3' gccggaCUAAGUG-UUGUGGUCGa 5'	|| ||:| ||:||||||	5' tagtggGACTCGCTAATACCAGCc 3'
rno-miR-138-5p	Abcf2	153	-17.18	2	22	354	376	3' gcCGGACUAAGUGUUGUGGUCGa 5'	|:: || |:| |||||||	5' atGTTGGAGAAATACCACCAGCc 3'
rno-miR-138-5p	Abcg1	161	-22.59	2	18	630	652	3' gccggaCUAAGUGUUGUGGUCGa 5'	|| ||| ||||||||	5' gtgaggGAGACACCACACCAGCt 3'
rno-miR-138-5p	Abhd13	141	-19.52	2	18	1600	1622	3' gccggaCUAAGUGUUGUGGUCGa 5'	||| | |::||||||	5' aatgacGATCCTGAGTACCAGCc 3'
rno-miR-138-5p	Abhd6	144	-20.3	2	21	971	993	3' gccGGACUAAGUGUUGUGGUCGa 5'	:| || :| ||:||||||	5' cccTCGGAAGTAAAATACCAGCt 3'
rno-miR-138-5p	Abi3	142	-16.78	2	20	247	271	3' gccgGACUAAGUG--UUGUGGUCGa 5'	|| || ||| | |:|||||	5' ctagCTCATGCACCGATCGCCAGCa 3'
rno-miR-138-5p	Abr	142	-24.94	2	22	1370	1393	3' gcCGGACUAAGUGUU--GUGGUCGa 5'	|||||| || :| :||||||	5' caGCCTGA-GCAGGAGCTACCAGCc 3'
rno-miR-138-5p	Abtb2	162	-25.57	2	22	284	308	3' gcCGGACUAAGU---GUUGUGGUCGa 5'	||| ||| || ||:|||||||	5' gaGCC-GATCCACCTCAGCACCAGCc 3'
rno-miR-138-5p	Abtb2	144	-16.85	2	13	45	67	3' gccggacuaagUGUUGUGGUCGa 5'	| | |||||||	5' gttaaagccagAAACCACCAGCg 3'
rno-miR-138-5p	Acad11	148	-29.03	2	22	640	663	3' gcCGGACUA-AGUGUUGUGGUCGa 5'	|:||||| :::|||||||:	5' ggGTCTGATCGGGTGACACCAGTt 3'
rno-miR-138-5p	Acap3	152	-25.78	2	22	493	516	3' gcCGGACUAAGUGUU-GUGGUCGa 5'	| |||:| |:: |||||||	5' agGGCTGGTGGCCGGCCACCAGCa 3'
rno-miR-138-5p	Accn1	140	-18.69	2	22	258	282	3' gcCGGACUAAGUGUU--GUGGUCGa 5'	||| ||| :|||| |||| ||	5' ctGCCAGATGTACAAAGCACCTGCa 3'
rno-miR-138-5p	Acot3	145	-19.5	3	22	422	444	3' gcCGGACUAAGUGUUGUGGUCga 5'	|:: :||| ||:||||||	5' aaGTTCAGTTCCCAGCACCAGga 3'
rno-miR-138-5p	Acss1	158	-20.81	2	21	740	761	3' gccGGACUAAGUGUUGUGGUCGa 5'	:|||| ::| ||||||||	5' accTCTGAGCTGC-ACACCAGCa 3'
rno-miR-138-5p	Actr1a	148	-27.91	2	22	625	648	3' gcCGGACUAAGUGUU-GUGGUCGa 5'	| :|||||:|||| | |||||	5' agGGTTGATTTACAAGCTCCAGCc 3'
rno-miR-138-5p	Adam17	142	-13.67	2	17	1090	1111	3' gccggacUAAGUGUUGUGGUCGa 5'	|| ::| |||||||	5' aattgcaATGTGC-TCACCAGCa 3'
rno-miR-138-5p	Adam19	154	-19.93	2	22	1104	1126	3' gcCGGACUAAGU-GUUGUGGUCGa 5'	|:|| || || ::|||||||	5' acGTCT-ATGCAGGGGCACCAGCc 3'
rno-miR-138-5p	Adam30	158	-21.15	2	22	1049	1073	3' gcCGGACUAAGUGUU---GUGGUCGa 5'	|:| |: |||||| |||||||	5' atGTCAGG-TCACAATGTCACCAGCa 3'
rno-miR-138-5p	Adam7	161	-23.29	2	21	787	809	3' gccGGA-CUAAGUGUUGUGGUCGa 5'	||| || | |:|:|||||||	5' cctCCTAGACT-ATAGCACCAGCa 3'
rno-miR-138-5p	Adamts14	158	-21.15	2	17	104	125	3' gccggacUAAGUGUUGUGGUCGa 5'	||||| ::|||||||	5' ccaggacATTCA-GGCACCAGCc 3'
rno-miR-138-5p	Adamts19	140	-16.8	2	14	1166	1189	3' gccggacuaaGUGU-UGUGGUCGa 5'	|||| ||||:|||	5' tatttataaaCACACACACTAGCa 3'
rno-miR-138-5p	Adamtsl2	140	-21.71	2	21	520	542	3' gccGGACUAAGUGUUGUGGUCGa 5'	||||: | | :||||||	5' gttCCTGGGTGTCCCTACCAGCc 3'
rno-miR-138-5p	Adamtsl3	145	-18.91	2	10	1539	1561	3' gccggacuaaguguUGUGGUCGa 5'	||||||||	5' gggaaggaaagagcACACCAGCc 3'
rno-miR-138-5p	Adat1	151	-22.27	2	22	1147	1173	3' gcCGGACU--AAG--UGUUGUGGUCGa 5'	|||| | ||| |||:||:||||	5' atGCCTTAATTTCCTACAGCATCAGCa 3'
rno-miR-138-5p	Adck4	141	-18.48	2	21	326	346	3' gccGGACUAAGUGUUGUGGUCGa 5'	|:|| ||| | :||||||	5' tccCTTGCTTCTC--TACCAGCt 3'
rno-miR-138-5p	Adcy6	144	-21.06	2	17	455	477	3' gccggacUAAGUGUUGUGGUCGa 5'	| || ||::||||||	5' cttgggcACTCCCAGTACCAGCc 3'
rno-miR-138-5p	Adcy6	140	-25.68	2	21	2132	2154	3' gccGGACUAAGUGUUGUGGUCGa 5'	|||| ||||:::|||||	5' ctcCCTGCACCACAGTGCCAGCc 3'
rno-miR-138-5p	Add3	146	-18.06	2	22	1163	1185	3' gcCGGACUAAG-UGUUGUGGUCGa 5'	||| | | | |: |||||||	5' caGCCAG-TCCAATCCCACCAGCg 3'
rno-miR-138-5p	Adh1	146	-22.31	2	22	35	59	3' gcCGGA---CUAAGUGUUGUGGUCGa 5'	|||| || ||| |:|:|||||	5' ccGCCTACCGAATCA-AGCGCCAGCc 3'
rno-miR-138-5p	Adh7	164	-18.64	2	22	764	787	3' gcCGGACUAAG-UGUUGUGGUCGa 5'	| :|| ||: || ||||||||	5' caGATTGCTTTAACTACACCAGCc 3'
rno-miR-138-5p	Adnp	156	-21.71	2	21	1876	1898	3' gccGGACUAAGUGUUGUGGUCGa 5'	|| || : |||||||||	5' acaCCCAATCAGAAACACCAGCt 3'
rno-miR-138-5p	Aen	161	-21.16	2	22	631	653	3' gcCGGACUAAGUGUUGUGGUCGa 5'	||:| || | ||||||||	5' caGCTTCTGTCTCCACACCAGCc 3'
rno-miR-138-5p	Afap1	150	-19.93	2	22	21	43	3' gcCGGACUAAGUG-UUGUGGUCGa 5'	| ||| | :|| : |||||||	5' gaGACTG-TGTACTGCCACCAGCc 3'
rno-miR-138-5p	Aff4	148	-23.6	2	22	5788	5806	3' gcCGGACUAAGUGUUGUGGUCGa 5'	|:|||:| | |||||||	5' agGTCTGGTCC----CACCAGCa 3'
rno-miR-138-5p	Aff4	147	-17.96	2	22	652	673	3' gcCGGACUAAGUGUUGUGGUCGa 5'	|: || || ::|||||:|||	5' atGTGTG-TTGGTAACACTAGCa 3'
rno-miR-138-5p	Afg3l2	143	-30.17	2	22	136	160	3' gcCGGACU-AAGUG-UUGUGGUCGa 5'	|||||: |||| |||||::||	5' caGCCTGGCCTCACGAACACTGGCt 3'
rno-miR-138-5p	Agk	140	-19.67	2	22	59	83	3' gcCGGAC--UAAGUGUUGUGGUCGa 5'	| ||| |||| : ||||||:	5' caGGCTGCTCTTCAAGCCACCAGTg 3'
rno-miR-138-5p	Agl	141	-19.99	3	20	2021	2045	3' gccgGAC-UAAGUGU-UGUGGUCga 5'	||| |||| | |||||||	5' gtagCTGTCTTCAGACACACCAGaa 3'
rno-miR-138-5p	Agpat1	144	-25.53	2	21	438	460	3' gccGGACUAAGUGUUGUGGUCGa 5'	||||| | | ||||:||	5' gaaCCTGACACTCCTCACCGGCt 3'
rno-miR-138-5p	Agpat2	150	-28.22	3	22	381	404	3' gcCGGACUAAGUG--UUGUGGUCga 5'	||| |:||||| |:||||||	5' aaGCC-GGTTCACATAGCACCAGag 3'
rno-miR-138-5p	Agpat3	145	-22.75	2	19	170	193	3' gccggACUAAGU-GUUGUGGUCGa 5'	||:|| : ||:||||:||	5' gaagaTGGTTGGCCAGCACCGGCa 3'
rno-miR-138-5p	Ahcyl2	156	-16.12	2	17	2909	2931	3' gccggacUAAGUGUUGUGGUCGa 5'	|| ::|||||||||	5' aaagaaaATAGGTAACACCAGCa 3'
rno-miR-138-5p	Ahdc1	140	-19.9	2	21	206	228	3' gccGGACUAAGUGUUGUGGUCGa 5'	|:| | ||||| ||||||	5' gccCTTTCTGCACAAAACCAGCa 3'
rno-miR-138-5p	Ahsg	148	-21.21	2	22	160	183	3' gcCGGACUAAGU-GUUGUGGUCGa 5'	||| | || ||||||:|||	5' aaGCCAGCAGCAGCAACACTAGCa 3'
rno-miR-138-5p	aicda	143	-23.95	3	22	1205	1230	3' gcCGG--ACUAAGU-GUUGUGGUCga 5'	||| || ||:| ||||||||	5' caGCCTGTGCTTTAGAAACACCAGaa 3'
rno-miR-138-5p	Aif1l	146	-18.73	2	19	2323	2345	3' gccggACUAAGUGUUGUGGUCGa 5'	| | | ::: |||||||	5' aaatgTAACTGGTGTCACCAGCa 3'
rno-miR-138-5p	Aifm2	145	-19.24	2	19	1615	1639	3' gccggACUAAGUGUU--GUGGUCGa 5'	|||||: ||: :||||||	5' tcgagTGATTTCCAGGTTACCAGCa 3'
rno-miR-138-5p	Aire	157	-25.2	2	14	1	23	3' gccggacuaaGUGUUGUGGUCGa 5'	||:|:|||||||	5' ctccaggcagCATAGCACCAGCc 3'
rno-miR-138-5p	Ak1	144	-22.66	2	18	774	799	3' gccggaCUAAGUGUU---GUGGUCGa 5'	|: |||::: |||||||	5' ggcaaaGGGTCATGGGCTCACCAGCt 3'
rno-miR-138-5p	Ak7	145	-24.54	2	14	366	388	3' gccggacuaaGUGUUGUGGUCGa 5'	|||:|||:||||	5' tgttgaaaccCACGACATCAGCt 3'
rno-miR-138-5p	Akap13	155	-24.3	2	22	949	970	3' gcCGGACUAAGUGUUGUGGUCGa 5'	||:||| | | |||||||	5' atGCTTGAGGC-CTTCACCAGCt 3'
rno-miR-138-5p	Akap13	149	-21.92	2	18	2621	2643	3' gccggaCUAAGUGUUGUGGUCGa 5'	|: ||||| |||:|||	5' ttttgaGGGTCACACCACTAGCg 3'
rno-miR-138-5p	Akap2	141	-18.78	2	14	433	455	3' gccggacuaaGUGUUGUGGUCGa 5'	| | |||||||	5' cacaggctacCCCTCCACCAGCt 3'
rno-miR-138-5p	Akr1b10	145	-16.26	3	19	217	240	3' gccggACUAAGUGU-UGUGGUCga 5'	|| ||| || |||||||	5' ctgaaTGTTTCCCAGACACCAGga 3'
rno-miR-138-5p	Akt1s1	140	-20.4	2	13	509	531	3' gccggacuaagUGUUGUGGUCGa 5'	|||::||||||	5' ctgtacccaggACAGTACCAGCt 3'
rno-miR-138-5p	Aldh1a1	147	-19	2	22	37	58	3' gcCGGACUAAGUGUUGUGGUCGa 5'	|:|| | : |: |||||||	5' acGTCTCCTAT-CGTCACCAGCa 3'
rno-miR-138-5p	Aldh1a7	155	-19.77	2	22	42	63	3' gcCGGACUAAGUGUUGUGGUCGa 5'	|:|| | || | |||||||	5' atGTCTCCTACA-ATCACCAGCa 3'
rno-miR-138-5p	Aldh1l2	148	-25.59	2	21	649	671	3' gccGGACUAAGUGUUGUGGUCGa 5'	|||| :|| |||||:||	5' atcCCTGTCATACTACACCGGCt 3'
rno-miR-138-5p	Alg13	146	-19.45	2	21	955	976	3' gccGGACUAAGUGUUGUGGUCGa 5'	||| || | |||||||	5' tttCCT-CTTACCTCCACCAGCt 3'
rno-miR-138-5p	Alg6	166	-22.34	2	19	605	627	3' gccggACUAAGUGUUGUGGUCGa 5'	||:|| | |:|||||||	5' ctcagTGGTTAAGAGCACCAGCt 3'
rno-miR-138-5p	Alg9	147	-15.77	2	21	178	201	3' gccGGACUAAGU-GUUGUGGUCGa 5'	|| ||| :| ::|||:||||	5' cttCCAGATATATTGACATCAGCa 3'
rno-miR-138-5p	Alox12	140	-18.55	2	21	101	123	3' gccGGACUAAGUGUUGUGGUCGa 5'	:|||| | |||:||||	5' tctTCTGACCGAACACATCAGCa 3'
rno-miR-138-5p	Als2cl	152	-25.55	2	22	671	694	3' gcCGGACUAAGUG-UUGUGGUCGa 5'	|| |: |:: |||||||||	5' agGCAAGGGGCGTAAACACCAGCa 3'
rno-miR-138-5p	Alx1	159	-21.8	2	18	189	213	3' gccggaCUAAGU-GU-UGUGGUCGa 5'	|:||:| || ||||||||	5' tgaataGGTTTACCATACACCAGCc 3'
rno-miR-138-5p	Ammecr1l	143	-21.58	2	16	1124	1146	3' gccggacuAAGUGUUGUGGUCGa 5'	||||| ||||||:	5' tgggactcTTCACCTCACCAGTg 3'
rno-miR-138-5p	Amotl2	161	-21.14	2	18	752	774	3' gccggaCUAAGUGUUGUGGUCGa 5'	||||| :: |||||||	5' ccgtggGATTCTTGTCACCAGCc 3'
rno-miR-138-5p	Amotl2	153	-21.02	2	22	466	488	3' gcCGGACUAAGUGUU--GUGGUCGa 5'	|||| |||: :| |||||||	5' gaGCCT--TTCGGGAGCCACCAGCa 3'
rno-miR-138-5p	Amotl2	148	-20.99	2	18	299	323	3' gccggaCUAAGUG--UUGUGGUCGa 5'	|| | :| :||||||||	5' tcccaaGAATGGCTGGACACCAGCc 3'
rno-miR-138-5p	Amotl2	145	-18.75	2	21	925	947	3' gccGGACUAAGU-GUUGUGGUCGa 5'	| || |||: : |||||||	5' aaaCGTG-TTCGTTCCCACCAGCa 3'
rno-miR-138-5p	Ampd2	140	-23.84	2	22	516	540	3' gcCGGACUAAGUGUU--GUGGUCGa 5'	| |||: ||| | ||:||||	5' ggGGCTGGACCACCACTCATCAGCc 3'
rno-miR-138-5p	Amz2	140	-21.91	2	22	173	198	3' gcCGGACUAAGUGUU---GUGGUCGa 5'	|||| ||| |:: |||:|||	5' ctGCCTTTTTCTCGGTCTCACTAGCt 3'
rno-miR-138-5p	Anapc1	141	-22.19	2	22	779	801	3' gcCGGACUAAGUGUUGUGGUCGa 5'	| || :| |||:||||| ||	5' caGACTAGTGCACGACACCTGCt 3'
rno-miR-138-5p	Anapc11	146	-21.75	2	22	472	495	3' gcCGGACUAAGUGUU--GUGGUCGa 5'	||| | ||:|: |||||||	5' caGCCAG-CACATAGCCCACCAGCt 3'
rno-miR-138-5p	Anapc11	144	-18.7	2	18	593	616	3' gccggaCUAAGUGU-UGUGGUCGa 5'	| | :|| :|||||||	5' gaggtaGCTAAGCAGGCACCAGCc 3'
rno-miR-138-5p	Ank1	154	-20.31	2	15	2192	2214	3' gccggacuaAGUGUUGUGGUCGa 5'	|| | ||||||||	5' agaccattcTCCCTACACCAGCt 3'
rno-miR-138-5p	Ank1	147	-18.18	2	22	853	874	3' gcCGGACUAAGUGUUGUGGUCGa 5'	|:| || |: :|||||||	5' ctGTCCGA-GGATCGCACCAGCa 3'
rno-miR-138-5p	Ankh	141	-16.92	2	20	614	635	3' gccgGACUAAGUGUUGUGGUCGa 5'	|||| |:: | |:|||||	5' caaaCTGACTTG-ATCGCCAGCa 3'
rno-miR-138-5p	Ankrd10	153	-17.87	2	21	190	210	3' gccGGACUAAGUGUUGUGGUCGa 5'	:|| :|| ::||||||||	5' tttTCTTGTT--TGACACCAGCc 3'
rno-miR-138-5p	Ankrd12	140	-22.27	2	22	894	921	3' gcCGGACUAAG-----UGUUGUGGUCGa 5'	||||| ||| |||||| ||||	5' aaGCCTGTTTCCCCAAACAACAACAGCa 3'
rno-miR-138-5p	Ankrd13a	145	-20.14	2	22	233	255	3' gcCGGACUAAGUGUUGUGGUCGa 5'	|:| |||: :| :||||||	5' agGTCACATTTTTACTACCAGCt 3'
rno-miR-138-5p	Ankrd2	140	-21.23	3	21	19	41	3' gccGGACUAAGUGUUGUGGUCga 5'	|| || |: |:||||||	5' gcaCCCGACCCGGAGCACCAGac 3'
rno-miR-138-5p	Ankrd28	143	-18.11	2	17	2886	2909	3' gccggacUAAGU-GUUGUGGUCGa 5'	:|| | |||||||||:	5' ggaaagtGTTGACCAACACCAGTg 3'
rno-miR-138-5p	Ankrd28	143	-21.13	2	19	3071	3096	3' gccggAC-UAA-GU-GUUGUGGUCGa 5'	|| ||| || :||:||||||	5' agaggTGTATTACAGTAATACCAGCt 3'
rno-miR-138-5p	Ankrd28	148	-23.3	2	18	2886	2909	3' gccggaCUAAGU-GUUGUGGUCGa 5'	|:|| | |||||||||:	5' ggaaagGGTTGACCAACACCAGTg 3'
rno-miR-138-5p	Ankrd29	146	-23.82	3	22	1419	1445	3' gcCGG-AC-UAA--GUGUUGUGGUCga 5'	||: || :|| |||||||||||	5' aaGCTGTGCGTTGCCACAACACCAGac 3'
rno-miR-138-5p	Ankrd46	140	-19.38	3	22	650	675	3' gcCGGACUAAG---UGUUGUGGUCga 5'	|:| |||| | ||||||||	5' atGTCCCATTCAGAAAAACACCAGga 3'
rno-miR-138-5p	Ankrd54	164	-29.06	2	21	161	183	3' gccGGACUAAGUGUUGUGGUCGa 5'	|||| | ||:||:||||||	5' gctCCTGCTGCATAATACCAGCt 3'
rno-miR-138-5p	Ankrd54	158	-22.37	2	21	363	384	3' gccGGACUAAGUGUUGUGGUCGa 5'	|||| || : ||||||||	5' cgcCCTG-CTCCTTACACCAGCa 3'
rno-miR-138-5p	Ankrd58	140	-17.37	2	17	336	358	3' gccggacUAAGUGUUGUGGUCGa 5'	|| : :||:||||||	5' agtgcaaATGTCTAATACCAGCc 3'
rno-miR-138-5p	Ankrd6	157	-21.65	2	22	1682	1704	3' gcCGGACUAAGUGUUGUGGUCGa 5'	|::| :||:::||||||||:	5' atGTTTTGTTTGTAACACCAGTg 3'
rno-miR-138-5p	Anks1a	144	-23.78	2	21	838	858	3' gccGGACUAAGUGUUGUGGUCGa 5'	|| |: ||| |||||||	5' cacCCCGG-CCAC-TCACCAGCt 3'
rno-miR-138-5p	Ano1	155	-23.39	2	21	676	700	3' gccGGAC--UAAGUGUUGUGGUCGa 5'	|||| | | | ||||||||	5' atcCCTGGCAGGCTCCACACCAGCc 3'
rno-miR-138-5p	Ano1	142	-20.77	2	15	1116	1138	3' gccggacuaAGUGUUGUGGUCGa 5'	|| ||:||||||:	5' tgcaaagccTCTCAGCACCAGTg 3'
rno-miR-138-5p	Ano10	154	-21.35	2	16	182	205	3' gccggacuAAGUGUU-GUGGUCGa 5'	|||| |: |||||||	5' cttgtcccTTCAGAGTCACCAGCt 3'
rno-miR-138-5p	Ano6	140	-15.94	2	22	1210	1233	3' gcCGGACUAAGUGUU-GUGGUCGa 5'	||| | | ||| |||:|||	5' caGCCAGTAACCCAATCACTAGCc 3'
rno-miR-138-5p	Antxr1	164	-22.58	2	21	406	428	3' gccGGACUAAGUGUUGUGGUCGa 5'	||||: | || |||||||	5' accCCTGGGTACCATCACCAGCa 3'
rno-miR-138-5p	Antxr1	144	-21.09	2	21	804	826	3' gccGGACUAAGUGUUGUGGUCGa 5'	|| |||| ||:|||||	5' cctCCATCTTCAGCACGCCAGCt 3'
rno-miR-138-5p	Antxr1	143	-24.08	2	20	927	949	3' gccgGACUAAGUGUUGUGGUCGa 5'	|| | |||:||||||:	5' cctgCTCACAAACAGCACCAGTt 3'
rno-miR-138-5p	Anxa10	141	-18.89	3	21	27	49	3' gccGGACUAAGUGU-UGUGGUCga 5'	||| ||:|:| |||||||	5' aatCCT-CTTTATAGACACCAGat 3'
rno-miR-138-5p	Anxa5	157	-22.93	2	22	25	47	3' gcCGGACUAAGUGUUGUGGUCGa 5'	||||| | | || ||:||||	5' ccGCCTGCTGCCCACCATCAGCt 3'
rno-miR-138-5p	Anxa6	150	-22.67	2	19	32	54	3' gccggACUAAGUGUUGUGGUCGa 5'	||: || :|||||||	5' tgcagTGGCCAACCGCACCAGCc 3'
rno-miR-138-5p	Ap1b1	146	-21.85	2	22	476	496	3' gcCGGACUAAGUGUUGUGGUCGa 5'	||| || |:||||||||:	5' ctGCCCCAT--ATAACACCAGTt 3'
rno-miR-138-5p	Ap3m1	140	-18.54	2	9	230	252	3' gccggacuaaguguuGUGGUCGa 5'	|||||||	5' tttttccatgggggcCACCAGCt 3'
rno-miR-138-5p	Apba1	141	-15.86	3	22	184	206	3' gcCGGACUAAGUGUUGUGGUCga 5'	|:: || | :||||||||	5' atGTTCCATCCTTAACACCAGgg 3'
rno-miR-138-5p	Apbb2	162	-26.97	2	22	530	552	3' gcCG-GACUAAGUGUUGUGGUCGa 5'	|| :||:| || :||||||||	5' tgGCGTTGGTACA-GACACCAGCc 3'
rno-miR-138-5p	Apbb2	143	-24.07	2	21	572	595	3' gccGGACUAAGUG-UUGUGGUCGa 5'	:|||| |:: :|||||:||	5' ctcTCTGACGCGTGGACACCGGCt 3'
rno-miR-138-5p	Apc2	161	-23.79	2	22	1708	1730	3' gcCGGACUAAGUGUUGUGGUCGa 5'	|:|| : ::||:|||||||	5' acGTCTAGGCTGCAGCACCAGCa 3'
rno-miR-138-5p	Apc2	142	-21.02	2	21	1950	1971	3' gccGGACUAAGUGUUGUGGUCGa 5'	||||| | :|||||||:	5' ctcCCTGA-GCTGGACACCAGTg 3'
rno-miR-138-5p	Api5	154	-17.87	2	17	559	580	3' gccggacUAAGUGUUGUGGUCGa 5'	| |:| |||||||||	5' tcatagaAATTA-AACACCAGCt 3'
rno-miR-138-5p	Aplnr	141	-19.8	3	20	797	818	3' gccgGACUAAGUGUUGUGGUCga 5'	:||:|||| : ||||||	5' attgTTGGTTCA-GCCACCAGgg 3'
rno-miR-138-5p	Aplp2	160	-19.5	2	22	67	90	3' gcCGGACU-AAGUGUUGUGGUCGa 5'	||:||| | | | |||||||	5' gtGCTTGACTGCTGACCACCAGCg 3'
rno-miR-138-5p	Apob48r	145	-19.43	2	18	174	196	3' gccggaCUAAGUGUUGUGGUCGa 5'	|| ::| |||||||	5' agtgggGACCTGCTCCACCAGCa 3'
rno-miR-138-5p	Appbp2	165	-22.25	2	22	594	616	3' gcCGGACUAAGUGUUGUGGUCGa 5'	|:| | ||| :||||||||	5' ctGTCAGTCTCAGGACACCAGCa 3'
rno-miR-138-5p	Appbp2	159	-16.58	2	21	2911	2935	3' gccGGACUAAGUGUU--GUGGUCGa 5'	|:| || |||| |||||||	5' attCTTTATAAACAACTCACCAGCa 3'
rno-miR-138-5p	Appl2	145	-18.86	2	21	487	509	3' gccGGACUA-AGUGUUGUGGUCGa 5'	::||:| |:| |||||:|||	5' caaTTTGGTCTTA-AACACTAGCa 3'
rno-miR-138-5p	Aqp4	143	-22.43	3	21	1694	1717	3' gccGGAC-UAAGUGUUGUGGUCga 5'	::|| || :|| |||||||	5' ggcTTTGAATGTACTACACCAGag 3'
rno-miR-138-5p	Aqp4	141	-18.99	2	21	929	951	3' gccGGACUAAG-UGUUGUGGUCGa 5'	||| || | : |||||:|||	5' gcaCCT-ATACTGAAACACTAGCt 3'
rno-miR-138-5p	Aqr	159	-27.24	2	16	76	98	3' gccggacuAAGUGUUGUGGUCGa 5'	|| |::||||||||	5' gtacggctTTAATGACACCAGCt 3'
rno-miR-138-5p	Arap2	148	-21.79	3	21	708	730	3' gccGGACUAAGUGUUGUGGUCga 5'	| ||| ||| |||||||	5' cccCATGACACACTACACCAGag 3'
rno-miR-138-5p	Arc	153	-21.15	2	14	777	799	3' gccggacuaaGUGUUGUGGUCGa 5'	| ||:|||||||	5' ggggtaccacCCCAGCACCAGCa 3'
rno-miR-138-5p	Arc	149	-22.1	3	22	716	738	3' gcCGGACUAAGUGUUGUGGUCga 5'	||| |:| |::|||||||	5' gaGCCAGGTGAATGACACCAGgt 3'
rno-miR-138-5p	Arc	147	-23.4	2	20	974	994	3' gccgGACUAAGUGUUGUGGUCGa 5'	|||: ||| |||||||	5' tccgCTGG-CCAC-TCACCAGCt 3'
rno-miR-138-5p	Ard1b	153	-19.72	2	14	1622	1644	3' gccggacuaaGUGUUGUGGUCGa 5'	| ||:|||||||	5' atttctctagCCCAGCACCAGCc 3'
rno-miR-138-5p	Ard1b	149	-19.75	2	19	2205	2228	3' gccggAC-UAAGUGUUGUGGUCGa 5'	|| | |:::: |||||||	5' tcttgTGTAGTTGTGTCACCAGCt 3'
rno-miR-138-5p	Ard1b	141	-18.82	2	21	1210	1232	3' gccGGAC-UAAGUGUUGUGGUCGa 5'	:||| | || || ||:||||	5' tgtTCTGTAATC-CATCATCAGCc 3'
rno-miR-138-5p	Arf2	140	-15.91	2	18	127	150	3' gccggaCUAAGUG-UUGUGGUCGa 5'	| | :|| ||||||||:	5' atccacGCTATACGAACACCAGTa 3'
rno-miR-138-5p	Arfgef1	150	-24.17	2	22	217	240	3' gcCGGACUAAG--UGUUGUGGUCGa 5'	| ||| ||| |||:||:||||	5' aaGGCTG-TTCAGACAGCATCAGCc 3'
rno-miR-138-5p	Arfgef2	140	-18.28	2	15	154	175	3' gccggacuaAGUGUUGUGGUCGa 5'	|||| |||||||:	5' gtataaccaTCAC-ACACCAGTa 3'
rno-miR-138-5p	Arfip2	143	-24.6	2	22	120	141	3' gcCGGACUAAGUGUUGUGGUCGa 5'	||: |: || ::|||||||:	5' tgGCTGGGGTC-TGACACCAGTt 3'
rno-miR-138-5p	Arhgap1	146	-24.19	2	22	1043	1065	3' gcCGGACUAAGUGU-UGUGGUCGa 5'	|: ||: || : ||||||||	5' agGTGTGG-CCAGGCACACCAGCt 3'
rno-miR-138-5p	Arhgap10	150	-20.42	2	21	25	49	3' gccGGA-CUAAGUGUU-GUGGUCGa 5'	||| | | ||| |||||||	5' gatCCTAGCACCCCAAGCACCAGCc 3'
rno-miR-138-5p	Arhgap12	153	-18.02	2	18	126	148	3' gccggaCUAAGUGUUGUGGUCGa 5'	|| | | ::|||||||	5' agaagaGAGTGAAGGCACCAGCt 3'
rno-miR-138-5p	Arhgap22	157	-21.92	2	22	85	107	3' gcCGGACUAAGUGUUGUGGUCGa 5'	|::||: || : |||||||	5' aaGTTTGGGCCAGGCCACCAGCa 3'
rno-miR-138-5p	Arhgap22	144	-20.43	2	22	242	265	3' gcCGGACUAAGUG-UUGUGGUCGa 5'	||| : |||: |:||:||||	5' gtGCCAAGATCATGAGCATCAGCc 3'
rno-miR-138-5p	Arhgap4	151	-19.98	2	13	5	28	3' gccggacuaagUGU-UGUGGUCGa 5'	||| ||||||||	5' gctcacctccaACAGACACCAGCa 3'
rno-miR-138-5p	Arhgef18	158	-28.09	2	22	434	454	3' gcCGGACUAAGUGUUGUGGUCGa 5'	|:|||| | :||||||||	5' agGTCTGA--GAAGACACCAGCc 3'
rno-miR-138-5p	Arhgef19	149	-20.8	2	22	292	314	3' gcCGGACUAAGUGUUGUGGUCGa 5'	||| : :|| |||||||	5' gtGCCAAGAAAGCACCACCAGCt 3'
rno-miR-138-5p	Arhgef2	143	-14.89	2	21	876	895	3' gccGGACUAAGUGUUGUGGUCGa 5'	||| || : | |||||||	5' aacCCTAATGT-C--CACCAGCg 3'
rno-miR-138-5p	Arhgef3	152	-14.7	2	19	1340	1361	3' gccggACUAAGUGUUGUGGUCGa 5'	| || | | ||||||||	5' taaaaTTATAC-CCACACCAGCa 3'
rno-miR-138-5p	Arhgef3	150	-15.08	2	15	726	748	3' gccggacuaAGUGUUGUGGUCGa 5'	| | |:|||||||	5' aaacaaagcTAAAAGCACCAGCc 3'
rno-miR-138-5p	Arid3b	150	-23.21	2	16	771	794	3' gccggacuAAGU-GUUGUGGUCGa 5'	|||| | |||||||	5' ggggccatTTCAGCCCCACCAGCc 3'
rno-miR-138-5p	Arl13a	143	-16.9	2	20	53	75	3' gccgGACUAAGUGUUGUGGUCGa 5'	:|| ||| |||||||:	5' accaTTGTTTCTGCACACCAGTa 3'
rno-miR-138-5p	Arl15	143	-20.01	2	22	1915	1939	3' gcCGGAC-UAAGUGU-UGUGGUCGa 5'	|: || :||||:: :|:|||||	5' ctGTGTGTGTTCATGTGCGCCAGCg 3'
rno-miR-138-5p	Arl2	160	-23.47	2	21	36	56	3' gccGGACUAAGUGUUGUGGUCGa 5'	||| | || |:||||||||	5' tgtCCTCA-TC-CGACACCAGCc 3'
rno-miR-138-5p	Arl2	160	-25.12	2	22	52	75	3' gcCGGACUAAGUGUU-GUGGUCGa 5'	||| || |:|| |||||||	5' caGCCGGAGGGATAAGCACCAGCt 3'
rno-miR-138-5p	Arl2bp	148	-19.22	2	18	23	46	3' gccggaCUA-AGUGUUGUGGUCGa 5'	||| | | : |||||||	5' gtgatgGATATGAGGTCACCAGCc 3'
rno-miR-138-5p	Arl2bp	144	-13.39	2	17	593	615	3' gccggacUAAGUGUUGUGGUCGa 5'	| || : |||||||	5' cattaacAGTCCTTTCACCAGCg 3'
rno-miR-138-5p	Arl5b	144	-14.95	2	17	1220	1242	3' gccggacUAAGUGUUGUGGUCGa 5'	:| : :| |||||||	5' tcagagcGTCTTTATCACCAGCa 3'
rno-miR-138-5p	Arl5c	141	-19.14	2	22	24	46	3' gcCGGACUAAGUGUUGUGGUCGa 5'	||| || :|:||||||:	5' aaGCCACATGGTTAGCACCAGTg 3'
rno-miR-138-5p	Arl8a	142	-23.42	2	11	498	520	3' gccggacuaagugUUGUGGUCGa 5'	::|||||||	5' ggctctcggggcgGGCACCAGCc 3'
rno-miR-138-5p	Armc8	147	-20.67	2	20	1515	1534	3' gccgGACUAAGUGUUGUGGUCGa 5'	|||:| |: |||||||	5' agagCTGGT---CGTCACCAGCc 3'
rno-miR-138-5p	Armc9	169	-21.42	2	18	2022	2044	3' gccggaCUAAGUGUUGUGGUCGa 5'	|| || ||||||||||	5' cacagaGAATCTCAACACCAGCa 3'
rno-miR-138-5p	Armc9	145	-16.16	2	22	14	36	3' gcCGGACUAAGUGUUGUGGUCGa 5'	||:| | | |||||||	5' caGCTTCCGCCTCTCCACCAGCc 3'
rno-miR-138-5p	Armc9	145	-20.24	2	16	1521	1542	3' gccggacuAAGUGUUGUGGUCGa 5'	| ||| |||||||	5' gaaggcacTCCAC-CCACCAGCc 3'
rno-miR-138-5p	Armcx2	148	-20.4	2	21	146	167	3' gccGGACUAAGUGUU-GUGGUCGa 5'	:||| | |:|: |||||||	5' ttaTCTG--TGATAGTCACCAGCt 3'
rno-miR-138-5p	Arnt2	162	-24.97	2	19	305	327	3' gccggACUAAGUGUUGUGGUCGa 5'	||: | :||:|||||||	5' cacaaTGGCTGGCAGCACCAGCa 3'
rno-miR-138-5p	Arnt2	144	-20.18	2	20	3545	3565	3' gccgGACUAAGUGUUGUGGUCGa 5'	|||| :| |||||||	5' tgtgCTGAGGAGC--CACCAGCt 3'
rno-miR-138-5p	Art4	140	-17.32	3	17	179	201	3' gccggacUAAGUGUUGUGGUCga 5'	:| || ||||||||	5' tctaaacGTACAGAACACCAGag 3'
rno-miR-138-5p	Arvcf	141	-27.93	2	22	414	436	3' gcCGGACUAAGUGUUGUGGUCGa 5'	|||||| | |::|| ||||	5' ggGCCTGACTGCCGGCAGCAGCg 3'
rno-miR-138-5p	Asam	150	-14.89	2	15	610	632	3' gccggacuaAGUGUUGUGGUCGa 5'	|:|| |||||||	5' atttttctcTTACCCCACCAGCa 3'
rno-miR-138-5p	Asam	146	-21.4	2	20	51	74	3' gccgGACUAAGUGU-UGUGGUCGa 5'	|||: | |: |||||||	5' gtcaCTGGAGCTCGCCCACCAGCc 3'
rno-miR-138-5p	Asam	146	-20.33	2	18	1372	1392	3' gccggaCUAAGUGUUGUGGUCGa 5'	||||||| :||||||	5' agaaagGATTCAC--TACCAGCa 3'
rno-miR-138-5p	Asb13	140	-19.75	2	22	81	106	3' gcCGGACUAAGUG---UUGUGGUCGa 5'	||||| ||| | ||||||| |	5' ctGCCTGTTTCTCTGAAACACCATCa 3'
rno-miR-138-5p	Asf1b	143	-22.13	2	18	91	115	3' gccggaCU-AAGUGUU-GUGGUCGa 5'	|| || : :| |||||||	5' ctcaagGACTTGGGGACCACCAGCt 3'
rno-miR-138-5p	Aspg	146	-21.51	2	21	476	497	3' gccGGACUAAGUGUUGUGGUCGa 5'	||| | ||| |:||||||	5' ggaCCTCACGCAC-ATACCAGCa 3'
rno-miR-138-5p	Aspg	145	-24.34	3	22	46	68	3' gcCGGACUAAGUGUUGUGGUCga 5'	| |||: || :::||||||	5' acGACTGGATCCTGGCACCAGag 3'
rno-miR-138-5p	Aspscr1	143	-16.82	2	22	525	549	3' gcCGGACU-AAGUGUU-GUGGUCGa 5'	|| || | | |: |||||||	5' caGCAAGAGGTGAGAGCCACCAGCc 3'
rno-miR-138-5p	Astn1	148	-21.7	2	17	1755	1777	3' gccggacUAAGUGUUGUGGUCGa 5'	| | | ||||||||	5' cctcagcACTGTCCACACCAGCt 3'
rno-miR-138-5p	Atg12	151	-22.9	2	22	1621	1646	3' gcCGGA--CUAAGUG-UUGUGGUCGa 5'	|||| |: || : ::|||||||	5' ttGCCTCAGGCTCCTGGGCACCAGCt 3'
rno-miR-138-5p	Atg2a	153	-18.91	2	22	53	75	3' gcCGGACUAAGUGUUGUGGUCGa 5'	||| | | ::: |||||||	5' caGCCACAGTGGTGCCACCAGCt 3'
rno-miR-138-5p	Atg4b	146	-24.69	2	21	322	343	3' gccGGACUAAGUGUUGUGGUCGa 5'	||||: ||| :||:||||	5' agcCCTGG-TCAGCGCATCAGCt 3'
rno-miR-138-5p	Atg7	164	-26.79	2	21	140	162	3' gccGGACUAAGUGUUGUGGUCGa 5'	|||| |||: |||||||	5' tttCCTGTGTCATCTCACCAGCt 3'
rno-miR-138-5p	Atmin	143	-18.58	3	21	398	421	3' gccGGACU-AAGUGUUGUGGUCga 5'	:|||| || : |:||||||	5' cccTCTGACTTGGAAGCACCAGgg 3'
rno-miR-138-5p	Atoh8	140	-15.98	2	9	158	180	3' gccggacuaaguguuGUGGUCGa 5'	|||||||	5' gaccaggacaagggcCACCAGCc 3'
rno-miR-138-5p	Atoh8	140	-15.81	3	21	723	745	3' gccGGACUAAGUGUUGUGGUCga 5'	|| ||| ::| ||||||	5' ctcCCAGATGTGCCCCACCAGgt 3'
rno-miR-138-5p	Atoh8	140	-16.84	2	21	737	759	3' gccGGACUAAGUGUUGUGGUCGa 5'	|| |:| | | ||||||:	5' ccaCCAGGTGCTCCTCACCAGTg 3'
rno-miR-138-5p	Atp13a5	149	-28.55	2	22	15	37	3' gcCGGACUAAGUGUUGUGGUCGa 5'	||||||| |||||||:|| |	5' acGCCTGATCCACAACATCACCc 3'
rno-miR-138-5p	Atp1a2	151	-15.29	2	18	807	828	3' gccggaCUAAGUGUUGUGGUCGa 5'	|| | :| ||||||||	5' ttaagaGACTAGC-ACACCAGCa 3'
rno-miR-138-5p	Atp1a2	150	-21.71	2	22	373	393	3' gcCGGACUAAGUGUUGUGGUCGa 5'	||||| ||| | ||||||:	5' aaGCCTG--TCAGACCACCAGTa 3'
rno-miR-138-5p	Atp1b4	140	-21.22	2	9	6	28	3' gccggacuaaguguuGUGGUCGa 5'	|||||||	5' ccagggggccactccCACCAGCt 3'
rno-miR-138-5p	Atp2a3	158	-34.19	2	22	117	137	3' gcCGGACUAAGUGUUGUGGUCGa 5'	|||||| ||||||||:||	5' agGCCTGA--AACAACACCGGCc 3'
rno-miR-138-5p	Atp2b1	140	-17.3	2	20	290	314	3' gccgGACU---AAGUGUUGUGGUCGa 5'	|||| || || ||||:|||	5' taagCTGAACGTTAAC-ACACTAGCc 3'
rno-miR-138-5p	Atp2b2	147	-19.67	3	21	2445	2468	3' gccGGACUAA-GUGUUGUGGUCga 5'	||| ||| ||:: ||||||	5' caaCCTCATTCCATGCCACCAGgg 3'
rno-miR-138-5p	Atp4b	156	-24.89	2	21	158	177	3' gccGGACUAAGUGUUGUGGUCGa 5'	||||| :|| |||||||	5' ctcCCTGA---GCACCACCAGCt 3'
rno-miR-138-5p	Atp4b	144	-24.78	2	21	53	75	3' gccGGACUAAGUGUUGUGGUCGa 5'	||||| | ||| ||:|:||	5' cttCCTGACTGACATCATCGGCt 3'
rno-miR-138-5p	Atp6v0a1	140	-24.03	3	22	658	681	3' gcCG-GACUAAGUGUUGUGGUCga 5'	|| |||| |::||:||||:|	5' tcGCACTGACTTGCAGCACCGGgc 3'
rno-miR-138-5p	Atp6v0c	142	-16.74	2	21	1	19	3' gccGGACUAAGUGUUGUGGUCGa 5'	:|| ||| || ||||||:	5' ---TCTTTTTC-CACCACCAGTc 3'
rno-miR-138-5p	Atp6v1g3	152	-24.09	2	21	813	835	3' gccGGACUAAGUGUUGUGGUCGa 5'	|| | ::::||||||||	5' cctCCGGCAGTGTGACACCAGCa 3'
rno-miR-138-5p	Atp8a1	141	-17.48	2	20	331	352	3' gccgGACUAAGUGUUGUGGUCGa 5'	:||: ||| | ||||||:	5' ttcaTTGGATCA-ACCACCAGTc 3'
rno-miR-138-5p	Atp9b	145	-22.52	3	22	138	160	3' gcCGGACUAAGUGUUGUGGUCga 5'	||:|| | | |:||||||	5' agGCTTGCTCCTGAGCACCAGat 3'
rno-miR-138-5p	Atpaf1	145	-20.09	3	22	1204	1226	3' gcCGGACUAAGUGUUGUGGUCga 5'	|:: :||| ||:||||||	5' gaGTTCAGTTCCCAGCACCAGac 3'
rno-miR-138-5p	Atpaf1	141	-17.76	3	19	899	922	3' gccggACUAA-GUGUUGUGGUCga 5'	| ||| | ||:||||||	5' gcaagTTATTCCCCAGCACCAGaa 3'
rno-miR-138-5p	Axin1	162	-28.43	2	22	539	561	3' gcCGGACUAAGUGUU-GUGGUCGa 5'	||||| || ||: |||||||	5' ttGCCTGTCTC-CAGCCACCAGCt 3'
rno-miR-138-5p	Azgp1	151	-18.95	2	17	63	86	3' gccggacUAAGUG-UUGUGGUCGa 5'	| |||| : |||||||	5' cttcagaAGTCACTGTCACCAGCa 3'
rno-miR-138-5p	B3galnt2	144	-24.67	2	22	1042	1065	3' gcCGGACUA-AGUGUUGUGGUCGa 5'	||||| | || :||||||:	5' tgGCCTGCTACCAGCGCACCAGTa 3'
rno-miR-138-5p	B3galt2	150	-21.33	2	22	1604	1626	3' gcCGG-ACUAAGUGUUGUGGUCGa 5'	||: ||| ||: |||||||	5' caGCTATGAAACAT-CCACCAGCt 3'
rno-miR-138-5p	B3galt5	143	-22.64	2	12	1617	1639	3' gccggacuaaguGUUGUGGUCGa 5'	:::|||||||	5' gggtgggagagcTGGCACCAGCc 3'
rno-miR-138-5p	B3gnt3	151	-19.17	2	20	578	600	3' gccgGACUAAGUGUUGUGGUCGa 5'	|||| | : |||||||	5' ttcaCTGAGCCCTCTCACCAGCc 3'
rno-miR-138-5p	B3gnt6	140	-21.32	2	15	168	189	3' gccggacuaAGUGUUGUGGUCGa 5'	|||| |||||||:	5' tgttcctccTCAC-ACACCAGTc 3'
rno-miR-138-5p	Bai1	145	-21.55	2	22	345	364	3' gcCGGACUAAGUGUUGUGGUCGa 5'	||||| |: |||||||	5' ctGCCTG---CGGCCCACCAGCc 3'
rno-miR-138-5p	Bak1	155	-20.45	2	22	772	793	3' gcCGGACUAAGUGUUGUGGUCGa 5'	||: || || ||||||||	5' acGCTAGA-GAACTACACCAGCa 3'
rno-miR-138-5p	Bap1	167	-27.68	2	21	417	440	3' gccGGACUAAGUG-UUGUGGUCGa 5'	||||:| | | |:|||||||	5' ggtCCTGGTGCTCTAGCACCAGCc 3'
rno-miR-138-5p	Bap1	147	-22.29	2	21	373	397	3' gccGGACUA--AGUGUUGUGGUCGa 5'	:|| || ||||::||||||	5' gtcTCTTATAACCACAGTACCAGCt 3'
rno-miR-138-5p	Barx1	140	-21.57	2	21	303	325	3' gccGGACUAAGUGUUGUGGUCGa 5'	:|||: | :|||||:||	5' cctTCTGGGCCCGGACACCGGCa 3'
rno-miR-138-5p	Baz1b	142	-18.43	2	17	539	563	3' gccggacUAAG-UGU-UGUGGUCGa 5'	|||| ::: |||||||	5' atacagaATTCTGTGTTCACCAGCa 3'
rno-miR-138-5p	Bbs1	143	-25.2	2	22	621	642	3' gcCGGACUAAGUGUUGUGGUCGa 5'	||: |:||||| ||| ||||	5' gaGCTAGGTTCAC-ACAGCAGCt 3'
rno-miR-138-5p	Bcan	158	-23.75	2	21	227	248	3' gccGGACUAAGUGUUGUGGUCGa 5'	||||:| | | |||||||	5' cttCCTGGTGC-CCTCACCAGCc 3'
rno-miR-138-5p	Bcas3	145	-13.56	2	10	1	9	3' gccggacuaaguguUGUGGUCGa 5'	||||||||	5' --------------ACACCAGCc 3'
rno-miR-138-5p	Bckdk	143	-26.18	2	21	200	224	3' gccGGACUAAG--UGUUGUGGUCGa 5'	:|||| | |||:||||||	5' gccTCTGAGGCCTCCAATACCAGCt 3'
rno-miR-138-5p	Bcl2l2	141	-17.34	2	20	1914	1935	3' gccgGACUAAGUGUUGUGGUCGa 5'	|||| | | | ||:||||	5' accaCTGACT-AGACCATCAGCt 3'
rno-miR-138-5p	Bcl9l	145	-16.82	3	22	213	235	3' gcCGGACUAAGUGUUGUGGUCga 5'	||: |||: ::|||||||	5' ttGCTCCATTTCTGACACCAGga 3'
rno-miR-138-5p	Bcmo1	141	-27.88	2	22	46	68	3' gcCGGACUAAGUGUUGUGGUCGa 5'	|||||:| :||||||| ||:	5' caGCCTGGTCTACAACACAAGTt 3'
rno-miR-138-5p	Bend5	140	-15.79	3	21	69	91	3' gccGGACUAAGUGUUGUGGUCga 5'	|| || || |||||||	5' catCCAAATAGACTACACCAGac 3'
rno-miR-138-5p	Bend6	140	-18.14	2	13	134	156	3' gccggacuaagUGUUGUGGUCGa 5'	|:||:||||||	5' actaacttaagATAATACCAGCt 3'
rno-miR-138-5p	Bet1l	143	-22.43	3	22	394	415	3' gcCGGACUAAGUGUUGUGGUCga 5'	|:|||| | ::|||||||	5' gaGTCTGAAGC-TGACACCAGaa 3'
rno-miR-138-5p	Bhmt	155	-22.08	2	22	441	465	3' gcCGGACUAAG-UGU-UGUGGUCGa 5'	| | || | ||| ||||||||	5' taGGCAGAAACAACACACACCAGCc 3'
rno-miR-138-5p	Bicd2	141	-23.75	2	18	954	976	3' gccggaCUAAGUGUUGUGGUCGa 5'	|:| : ||:||||:||	5' tggagcGGTGTTCAGCACCGGCa 3'
rno-miR-138-5p	Bmp1	141	-17.82	3	22	496	518	3' gcCGGACUAAGUGUUGUGGUCga 5'	| || | | :| |||||||	5' taGGCTCACTGGCCACACCAGgg 3'
rno-miR-138-5p	Bnc1	142	-21.87	2	21	393	414	3' gccGGACUAAGUGUUGUGGUCGa 5'	| ||: ||::|||||||:	5' cacCATGG-GCATGACACCAGTc 3'
rno-miR-138-5p	Bnip3l	159	-24.56	2	22	249	275	3' gcCGGACUAAGU-GUU---GUGGUCGa 5'	||:| |||| ||| |||||||	5' ggGCTTTTTTCAGCAACGCCACCAGCa 3'
rno-miR-138-5p	Brunol5	159	-20.74	2	22	1375	1396	3' gcCGGACUAAGUGUUGUGGUCGa 5'	||| :||:: :||||||||	5' caGCCAAGTTTG-GACACCAGCt 3'
rno-miR-138-5p	Brunol5	147	-26.36	2	18	2079	2103	3' gccggaCUAAG-UGUU-GUGGUCGa 5'	|:| | ||| |||||||	5' acacacGGTCCTCCAATCACCAGCt 3'
rno-miR-138-5p	Brunol5	145	-19.38	2	21	645	665	3' gccGGACUAAGUGUUGUGGUCGa 5'	||| || | |||||||	5' ccaCCTCTGTCCC--CACCAGCt 3'
rno-miR-138-5p	Btbd12	144	-20.25	2	14	377	400	3' gccggacuaaGUG-UUGUGGUCGa 5'	||| : |||||||	5' agacacttgcCACTGTCACCAGCa 3'
rno-miR-138-5p	Btbd6	141	-25.18	2	22	108	130	3' gcCGGACUAAGUGUUGUGGUCGa 5'	|::||: |:|| |:|:||||	5' agGTTTGGCTTACTATATCAGCc 3'
rno-miR-138-5p	Btg1	150	-20.92	2	19	632	651	3' gccggACUAAGUGUUGUGGUCGa 5'	||:|| |:|||||||	5' aactgTGGTT---AGCACCAGCc 3'
rno-miR-138-5p	Btg1	148	-17.03	2	21	278	300	3' gccGGACUAAGUGUUGUGGUCGa 5'	|| |||::: |||||||:	5' ataCCCAATTTGTCACACCAGTc 3'
rno-miR-138-5p	Btrc	143	-30.6	2	22	181	202	3' gcCGGACUAAGUGUUGUGGUCGa 5'	|:||| ||: |||||:||	5' cgGTCTG-CTCGGCACACCGGCt 3'
rno-miR-138-5p	Bud31	144	-16.6	2	22	134	158	3' gcCGGACUAAGUGUU--GUGGUCGa 5'	| | | ||:| : |||||||	5' gtGACAGCTTTAGTGTTCACCAGCt 3'
rno-miR-138-5p	Bxdc2	154	-18.9	2	16	149	173	3' gccggacuAAGUGUU--GUGGUCGa 5'	|||| || |||||||	5' aaagcatcTTCAGAACTCACCAGCt 3'
rno-miR-138-5p	C1qc	151	-23.39	2	21	88	112	3' gccGGACUAAGUGUU--GUGGUCGa 5'	||||:||| ::| ||:||||	5' cacCCTGGTTCCTGACCCATCAGCc 3'
rno-miR-138-5p	C8a	144	-16.16	2	21	435	457	3' gccGGACUAAGUGUUGUGGUCGa 5'	|:| | | | :|||||||:	5' cctCTTTAGTAAGGACACCAGTc 3'
rno-miR-138-5p	C8b	164	-22.95	2	22	54	77	3' gcCGGACU-AAGUGUUGUGGUCGa 5'	||| |: ||:| ||||||||	5' taGCCAGGCTTTAGCACACCAGCt 3'
rno-miR-138-5p	Cab39	145	-17.11	3	22	41	63	3' gcCGGACUAAGUGUUGUGGUCga 5'	|:| | | | ||:||||||	5' ctGTCAGCTCCTCAGCACCAGgc 3'
rno-miR-138-5p	Cables2	150	-26.47	2	22	877	909	3' gcCGGAC--UAAG---UGUU-----GUGGUCGa 5'	||||| |||| |||| |||||||	5' agGCCTGTTATTCCCTACAACTGGTCACCAGCc 3'
rno-miR-138-5p	Cabp7	153	-21.11	2	22	879	900	3' gcCGGACUAA-GUGUUGUGGUCGa 5'	||| ||| | :::|||||||	5' atGCC--ATTCCTTGGCACCAGCt 3'
rno-miR-138-5p	Cachd1	144	-19.93	2	13	348	370	3' gccggacuaagUGUUGUGGUCGa 5'	|:: |||||||	5' tggcacaccagATGCCACCAGCt 3'
rno-miR-138-5p	Cacna1b	144	-19.82	2	14	5	28	3' gccggacuaaGUGU-UGUGGUCGa 5'	| || :|||||||	5' accacgaccaCCCATGCACCAGCt 3'
rno-miR-138-5p	Cacna1d	143	-25.47	3	21	500	523	3' gccGGACUAAGUGU-UGUGGUCga 5'	:|||| | :|: |||||||	5' cgtTCTGAGTGGCGCACACCAGaa 3'
rno-miR-138-5p	Cacna1g	144	-27.07	3	22	234	257	3' gcCGG-ACUAAGUGUUGUGGUCga 5'	||| |: || |:|||||||	5' tgGCCAAGGCTCCCGACACCAGga 3'
rno-miR-138-5p	Cacna1h	142	-19.33	3	21	215	241	3' gccGGACU--AAGU--GUUGUGGUCga 5'	||||| ||:| || ||||||	5' tttCCTGAGTTTTAACCACCACCAGaa 3'
rno-miR-138-5p	Calb2	154	-24.41	2	21	93	118	3' gccGGAC--UAAGUGU-UGUGGUCGa 5'	|||| | ::|| ||||||||	5' accCCTGCAACCTGCACACACCAGCc 3'
rno-miR-138-5p	Calb2	151	-17.25	2	21	330	353	3' gccGGACUA-AGUGUUGUGGUCGa 5'	|:| | |::| :|||||||	5' ctcCTTCCTCTTGCTGCACCAGCc 3'
rno-miR-138-5p	Calb2	148	-18.2	2	21	162	183	3' gccGGACUAAGU-GUUGUGGUCGa 5'	||| || | | :|||||||	5' attCCT--TTGAGCTGCACCAGCc 3'
rno-miR-138-5p	Calb2	140	-22.19	2	21	387	409	3' gccGGACUAAGUGUUGUGGUCGa 5'	|| |:||| ||||:||	5' attCCAGGTTCTGTCCACCGGCt 3'
rno-miR-138-5p	Calcr	152	-20.98	3	21	542	564	3' gccGGACUAAGUGUUGUGGUCga 5'	| |||| |||: ||||||	5' taaCATGATCCACGTCACCAGgc 3'
rno-miR-138-5p	Caly	141	-17.99	2	17	30	50	3' gccggacUAAGUGUUGUGGUCGa 5'	|| | | |||||||	5' actaggcATCCCC--CACCAGCt 3'
rno-miR-138-5p	Camk2b	146	-15.39	2	16	825	848	3' gccggacuAAGUG-UUGUGGUCGa 5'	||| | : |||||||	5' cttgtcccTTCCCTGCCACCAGCa 3'
rno-miR-138-5p	Camkk1	144	-19.47	3	18	749	772	3' gccggaCUAA-GUGUUGUGGUCga 5'	|:|| || ||||||||	5' aatgaaGGTTACAGAACACCAGga 3'
rno-miR-138-5p	Camsap1	149	-21.63	2	19	1354	1377	3' gccggACU-AAGUGUUGUGGUCGa 5'	||| | | :: |||||||	5' gtctgTGACTACCTGTCACCAGCt 3'
rno-miR-138-5p	Cap1	147	-15.6	2	20	197	219	3' gccgGACUAAGUGUUGUGGUCGa 5'	| | ||| | |||:||||	5' ggtgCAGCTTCTCCACATCAGCg 3'
rno-miR-138-5p	Cap1	141	-25.7	3	22	801	820	3' gcCGGACUAAGUGUUGUGGUCga 5'	||:||:||: |||||||	5' ggGCTTGGTTT---ACACCAGag 3'
rno-miR-138-5p	Capn1	145	-21.87	2	20	389	413	3' gccgGACU-AAGUGUU-GUGGUCGa 5'	| || |||::|| |||:|||	5' cctgCAGACTTCGTAACCACTAGCt 3'
rno-miR-138-5p	Capn7	142	-19.23	2	21	16	40	3' gccGGACUAA-GUGU-UGUGGUCGa 5'	|: |||| ||:| ||||||:	5' ttaCTGGATTCCATACCCACCAGTc 3'
rno-miR-138-5p	Caprin1	149	-20.42	2	22	549	568	3' gcCGGACUAAGUGUUGUGGUCGa 5'	| |||: |: ||||||||	5' gaGGCTGGCTT---ACACCAGCc 3'
rno-miR-138-5p	Caprin1	140	-16.02	2	21	959	981	3' gccGGACUAAGUGUUGUGGUCGa 5'	||| | | |:||||||:	5' cacCCTTTTGAAAAGCACCAGTa 3'
rno-miR-138-5p	Capza2	144	-19.45	2	17	539	561	3' gccggacUAAGUGUUGUGGUCGa 5'	|||: | |||||||:	5' ggcgagcATTTTCTACACCAGTc 3'
rno-miR-138-5p	Car11	140	-18.73	3	21	28	50	3' gccGGACUAAGUGUUGUGGUCga 5'	:|||| |: | ||||||	5' tgtTCTGAGTTTCCTCACCAGgg 3'
rno-miR-138-5p	Car6	153	-23.98	3	22	293	315	3' gcCGGACUAAGUGUUGUGGUCga 5'	|::|||| | |::||||||	5' gaGTTTGATCCCCGGCACCAGaa 3'
rno-miR-138-5p	Carm1	140	-21.84	3	17	21	43	3' gccggacUAAGUGUUGUGGUCga 5'	| | |||:||||||	5' actgcgcACTGACAGCACCAGga 3'
rno-miR-138-5p	Casp2	140	-18.11	2	21	1167	1189	3' gccGGACUAAGUGUUGUGGUCGa 5'	||| :|| | ||||::|||	5' ctcCCTTGTTAAGAACATTAGCt 3'
rno-miR-138-5p	Casp3	147	-21.51	2	18	691	716	3' gccggaCUAAG-UGUU--GUGGUCGa 5'	|:| | ||:| |||||||	5' cgacagGGTGCTACGATCCACCAGCa 3'
rno-miR-138-5p	Casp3	145	-22.95	2	14	838	860	3' gccggacuaaGUGUUGUGGUCGa 5'	||:||:||||||	5' aggaacagacCATAATACCAGCt 3'
rno-miR-138-5p	Casp7	155	-28.56	2	22	830	854	3' gcCGGAC-UAAGUGU-UGUGGUCGa 5'	||||| : ||:| |||||||	5' agGCCTGTGCCCATATCCACCAGCg 3'
rno-miR-138-5p	Casp7	143	-29.23	2	22	395	416	3' gcCGGACUAAGUGUUGUGGUCGa 5'	| |||| ||| |:|||||	5' acGGCTGAGACAC-TCGCCAGCc 3'
rno-miR-138-5p	Casp9	155	-27.37	2	22	474	498	3' gcCGGAC-UAAGUGU-UGUGGUCGa 5'	|:||| : ::|| ||||||||	5' ggGTCTGTGGCTGCAGACACCAGCa 3'
rno-miR-138-5p	Casq1	153	-20.71	2	22	171	193	3' gcCGGACUAAGUGUUGUGGUCGa 5'	||:| || : |:|:||||||	5' ctGCTTTATCTCCGATACCAGCc 3'
rno-miR-138-5p	Casq2	159	-20.04	2	22	593	614	3' gcCGGACUAAGUGUUGUGGUCGa 5'	|||| || :|: |||||||	5' aaGCCTCATATAT-TCACCAGCa 3'
rno-miR-138-5p	Cav3	167	-26.3	2	22	719	740	3' gcCGGACUAAGUGUUGUGGUCGa 5'	||:|| | |:|| |||||||	5' caGCTTG-TGCGCACCACCAGCc 3'
rno-miR-138-5p	Cbara1	167	-28.62	2	22	468	489	3' gcCGGACUAAGUGUUGUGGUCGa 5'	|:||| ||| :||||||||	5' ggGTCTGCGTCA-GACACCAGCg 3'
rno-miR-138-5p	Cbara1	144	-15.6	2	16	497	517	3' gccggacuAAGUGUUGUGGUCGa 5'	||::| |||||||	5' gaaggctcTTTGC--CACCAGCa 3'
rno-miR-138-5p	Cbfa2t2	149	-18.37	2	21	268	290	3' gccGGACUAAGUGU-UGUGGUCGa 5'	:|| | | ::| ||||||||	5' cctTCTCAGT-GTATACACCAGCt 3'
rno-miR-138-5p	Cbfa2t2	140	-17.26	2	21	291	313	3' gccGGACUAAGUGUUGUGGUCGa 5'	:| |: || | :||:||||	5' cccTCCGGCTCCCTGCATCAGCa 3'
rno-miR-138-5p	Cbln4	140	-15.79	3	21	837	859	3' gccGGACUAAGUGUUGUGGUCga 5'	||| ||| | ||||||	5' ctaCCTTATTAAACCCACCAGga 3'
rno-miR-138-5p	Cbx6	141	-29.59	2	22	1509	1531	3' gcCGGACUAAGUGUUGUGGUCGa 5'	|:||| ||||:| |||||	5' ggGTCTGCAGCACAGCCCCAGCc 3'
rno-miR-138-5p	Cbx7	149	-16.37	2	19	1964	1987	3' gccggACUAAGUGUU-GUGGUCGa 5'	||| | :::: |||||||	5' agcaaTGAGTGGTGGCCACCAGCc 3'
rno-miR-138-5p	Ccbp2	165	-20.63	2	19	62	85	3' gccggACUAAGUGUU-GUGGUCGa 5'	||:||: ||| |||||||	5' cccagTGGTTTCCAACCACCAGCa 3'
rno-miR-138-5p	Ccdc134	147	-21.27	2	21	84	104	3' gccGGA-CUAAGUGUUGUGGUCGa 5'	||| ||| |:|||||||	5' gcaCCTCGAT---GAGCACCAGCa 3'
rno-miR-138-5p	Ccdc21	160	-26.1	2	21	421	443	3' gccGGACUAAGUGUUGUGGUCGa 5'	||||: |||: |||:||||	5' agtCCTGGATCATCACATCAGCc 3'
rno-miR-138-5p	Ccdc25	145	-17.73	2	10	1113	1135	3' gccggacuaaguguUGUGGUCGa 5'	||||||||	5' tcttcagcaaatgtACACCAGCt 3'
rno-miR-138-5p	Ccdc75	165	-24.77	2	21	335	357	3' gccGGACU-AAGUGUUGUGGUCGa 5'	||||| |||| : |||||||	5' gctCCTGAGTTCA-GTCACCAGCa 3'
rno-miR-138-5p	Ccdc82	144	-16.82	2	21	167	189	3' gccGGACUAAGUGUUGUGGUCGa 5'	::| || | ||||:||||	5' gatTTTCATGGAGAACATCAGCt 3'
rno-miR-138-5p	Ccdc97	143	-17.58	2	12	740	762	3' gccggacuaaguGUUGUGGUCGa 5'	:::|||||||	5' ggggaacccagtTGGCACCAGCc 3'
rno-miR-138-5p	Ccl24	160	-26.19	2	22	53	77	3' gcCGGA--CUAAGUGUUGUGGUCGa 5'	|||| | |::| ||||||||	5' ctGCCTTGGCCTTGCCACACCAGCt 3'
rno-miR-138-5p	Ccna1	152	-20.49	2	22	3	28	3' gcCGGACUAAGUGU---UGUGGUCGa 5'	|:| | | ||| ||||||||	5' ggGTCAGCTCAACAGCCACACCAGCa 3'
rno-miR-138-5p	Ccnc	151	-20.24	2	17	2129	2152	3' gccggacUAAGUGUU-GUGGUCGa 5'	| || ||: |||||||	5' actgtccAGTCTCAGCCACCAGCc 3'
rno-miR-138-5p	Ccnd1	150	-25.77	2	20	702	726	3' gccgGACUAAGUG--UUGUGGUCGa 5'	| |:||||| |:|:|||||	5' cctgCAGGTTCACAGAGCGCCAGCc 3'
rno-miR-138-5p	Ccnd1	150	-19.68	2	18	2505	2525	3' gccggaCUAAGUGUUGUGGUCGa 5'	|: |||| |||||||	5' ccaaaaGGGTCAC--CACCAGCt 3'
rno-miR-138-5p	Ccnd3	151	-20.82	2	14	272	293	3' gccggacuaaGUGUUGUGGUCGa 5'	||| ||||||||	5' aggtagaaccCAC-ACACCAGCa 3'
rno-miR-138-5p	Ccne1	149	-21.12	2	18	186	208	3' gccggaCUAAGUGUUGUGGUCGa 5'	|:| | ||||||||	5' ctatagGGTCGAGTACACCAGCc 3'
rno-miR-138-5p	Ccnjl	157	-21.13	2	18	983	1005	3' gccggaCUAAGUGUUGUGGUCGa 5'	|:| ::::||||||||	5' taatggGGTATGTGACACCAGCa 3'
rno-miR-138-5p	Ccnjl	140	-16.25	2	9	1656	1678	3' gccggacuaaguguuGUGGUCGa 5'	|||||||	5' cccctccacctcctcCACCAGCc 3'
rno-miR-138-5p	Ccny	150	-25.54	3	22	348	370	3' gcCGGACUAAGUGU-UGUGGUCga 5'	|:|||: |||:| |||||||	5' ctGTCTGG-TCATAGACACCAGat 3'
rno-miR-138-5p	Ccnyl1	141	-18.65	3	18	9	31	3' gccggaCUAAGUGUUGUGGUCga 5'	|| | | ||||||||	5' cttgagGAGTGAGAACACCAGgg 3'
rno-miR-138-5p	Ccr9	152	-23.63	2	13	200	222	3' gccggacuaagUGUUGUGGUCGa 5'	||::|||||||	5' accaccccagaACGGCACCAGCt 3'
rno-miR-138-5p	Cct3	145	-26.42	2	22	13	35	3' gcCGGACUAAGUGUUGUGGUCGa 5'	| |||| ||||: ||||||	5' gtGGCTGAACCACAGAACCAGCa 3'
rno-miR-138-5p	Cct8	147	-22.67	3	22	461	487	3' gcCGGA-CUAAGUGU---UGUGGUCga 5'	|:|| || ||||| |||||||	5' atGTCTAGAGTCACACTGACACCAGga 3'
rno-miR-138-5p	Cd200	147	-16.57	2	21	267	290	3' gccGGACUAAGUGUU-GUGGUCGa 5'	|| || |:| || ||||||:	5' gcaCCAGACTTAGAATCACCAGTg 3'
rno-miR-138-5p	Cd226	144	-16.81	2	19	443	464	3' gccggACUAAGUGUUGUGGUCGa 5'	| |||||| |||:|||	5' gtttaTTATTCAC-TCACTAGCa 3'
rno-miR-138-5p	Cd2bp2	140	-16.18	2	22	812	835	3' gcCGGACUA-AGUGUUGUGGUCGa 5'	| | | | |||| ||||||:	5' ctGACAGTTCTCACCCCACCAGTg 3'
rno-miR-138-5p	Cd44	149	-20.36	2	21	290	312	3' gccGGACUAAGUGU-UGUGGUCGa 5'	|| |: | ||| |||||||	5' gtcCCAGG-TAACATCCACCAGCt 3'
rno-miR-138-5p	Cd59	143	-18.11	2	22	860	881	3' gcCGGACUAAGUGUUGUGGUCGa 5'	|| || |: :||:||||||	5' gtGCATGCCTT-TAATACCAGCa 3'
rno-miR-138-5p	Cd83	156	-24.3	2	21	399	421	3' gccGGACUAAGUGUUGUGGUCGa 5'	|||| |||:: :||||||:	5' tgtCCTGTTTCGTTGCACCAGTc 3'
rno-miR-138-5p	Cdan1	144	-23.58	2	21	35	57	3' gccGGACUAAGUGUUGUGGUCGa 5'	|||| || ||| ||||||	5' aacCCTGCCTCTCAAGACCAGCc 3'
rno-miR-138-5p	Cdc123	140	-19.33	2	22	96	119	3' gcCGGACUAAGUGUU-GUGGUCGa 5'	|| || || || ||:||||	5' ggGCAGTATGCAAAATCATCAGCt 3'
rno-miR-138-5p	Cdc25a	147	-19.05	2	22	1232	1256	3' gcCGGAC-UAAGUG-UUGUGGUCGa 5'	|:| | :| | | ::|||||||	5' ctGTCAGTGTCCTCGGGCACCAGCc 3'
rno-miR-138-5p	Cdc26	147	-20.62	2	21	791	814	3' gccGGACUAAGUGUU-GUGGUCGa 5'	:| |: |: || |||||||	5' aatTCAGGGACGGAACCACCAGCt 3'
rno-miR-138-5p	Cdc2l6	158	-25.14	2	20	396	419	3' gccgGACUA-AGUGUUGUGGUCGa 5'	||||| | :|||||||||:	5' tgaaCTGATCTAGCAACACCAGTc 3'
rno-miR-138-5p	Cdc42ep4	150	-21.67	2	21	195	216	3' gccGGACUAAGUGUUGUGGUCGa 5'	| | ||| | :|||||||	5' gtcCGTCCTTC-CCGCACCAGCt 3'
rno-miR-138-5p	Cdc42se1	140	-14.94	2	21	66	88	3' gccGGACUAAGUGUUGUGGUCGa 5'	|| ||| | : ||||||:	5' tcaCCAGATCCCTTCCACCAGTg 3'
rno-miR-138-5p	Cdc42se2	146	-24.28	2	21	834	855	3' gccGGACUAAGUGUUGUGGUCGa 5'	|| | || :: |||||||	5' attCCGGCCTC-TGCCACCAGCt 3'
rno-miR-138-5p	Cdc6	144	-27.36	2	22	95	119	3' gcCGGACUAAGU--GUUGUGGUCGa 5'	|||| ||:| | :||||||:	5' cgGCCTTTTTTACTCCGCACCAGTa 3'
rno-miR-138-5p	Cdcp1	142	-22	3	20	21	44	3' gccgGACUAAG-UGUUGUGGUCga 5'	|||| | |:|:||||||	5' tttgCTGAGACAATAGCACCAGgc 3'
rno-miR-138-5p	Cdcp1	140	-17.65	2	14	1228	1251	3' gccggacuaaGUGU-UGUGGUCGa 5'	|||| |||||||:	5' cacacacacaCACACACACCAGTg 3'
rno-miR-138-5p	Cdh2	156	-31.93	2	22	1086	1110	3' gcCGGACUA--AGUGUUGUGGUCGa 5'	|||||:| | :||:|||:|||	5' tgGCCTGGTACTGGCAGCACTAGCa 3'
rno-miR-138-5p	Cdh22	140	-11.7	2	9	1	8	3' gccggacuaaguguuGUGGUCGa 5'	|||||||	5' ---------------CACCAGCc 3'
rno-miR-138-5p	Cdig2	149	-23.46	2	21	190	215	3' gccGGAC-UAAG-UGUU-GUGGUCGa 5'	:||| | | |||: |||||||	5' ggaTCTGAAGGCAACAGTCACCAGCc 3'
rno-miR-138-5p	Cdk10	155	-21.52	2	20	278	300	3' gccgGACUAAGUGUUGUGGUCGa 5'	|||| | ::|||||||	5' ggaaCTGAAGCTGGGCACCAGCc 3'
rno-miR-138-5p	Cdk5	141	-18.68	2	18	74	96	3' gccggaCUAAGUGUUGUGGUCGa 5'	||| | |::||||||	5' gtatggGATGCTGAGTACCAGCt 3'
rno-miR-138-5p	Cdk5rap3	168	-24.44	2	21	114	136	3' gccGGACUAAGUGUUGUGGUCGa 5'	||||| | ::::|||||||	5' gcaCCTGAGTGGTGGCACCAGCa 3'
rno-miR-138-5p	Cdk5rap3	158	-24.21	2	21	7	28	3' gccGGACUAAGUGUUGUGGUCGa 5'	|||| || |: |||||||	5' ggcCCTGTGTC-CGCCACCAGCg 3'
rno-miR-138-5p	Cdk5rap3	151	-18.39	2	20	56	78	3' gccgGACUAAGUGUUGUGGUCGa 5'	:|| | || |||||||	5' ggtaTTGCTGGACCTCACCAGCa 3'
rno-miR-138-5p	Cdkn1c	144	-19.84	2	13	449	471	3' gccggacuaagUGUUGUGGUCGa 5'	| | |||||||	5' aaaggcactagAAATCACCAGCt 3'
rno-miR-138-5p	Cdkn2d	155	-23.27	2	18	198	222	3' gccggaCUAAG-UGU-UGUGGUCGa 5'	| ||| ||| :|||||||	5' gaagggGCTTCTACAGGCACCAGCc 3'
rno-miR-138-5p	Cdyl	163	-25.73	2	22	5	26	3' gcCGGACUAAGUGUUGUGGUCGa 5'	| |||| || :||||||||	5' caGGCTGA-GCAGGACACCAGCg 3'
rno-miR-138-5p	Cdyl2	141	-16.29	2	21	288	308	3' gccGGACUAAGUGUUGUGGUCGa 5'	||| ||| | :|||:|||	5' tgaCCT--TTCCCTGCACTAGCc 3'
rno-miR-138-5p	Ceacam1	153	-21.38	2	21	659	681	3' gccGGACU-AAGUGUUGUGGUCGa 5'	|:||: || |||||||||	5' cccCTTGGCAGCA-AACACCAGCa 3'
rno-miR-138-5p	Ceacam1	150	-22.2	2	17	542	563	3' gccggacUAAGUGUUGUGGUCGa 5'	:| |:| ||||||||	5' ctgggcaGTCCGC-ACACCAGCc 3'
rno-miR-138-5p	Ceacam1	142	-19.38	2	21	8	29	3' gccGGACUAAGUGUUGUGGUCGa 5'	|||| | || :||||||:	5' tgtCCTG-CTGACTGCACCAGTg 3'
rno-miR-138-5p	Ceacam1	153	-21.38	2	21	789	811	3' gccGGACU-AAGUGUUGUGGUCGa 5'	|:||: || |||||||||	5' cccCTTGGCAGCA-AACACCAGCa 3'
rno-miR-138-5p	Ceacam1	150	-22.2	2	17	672	693	3' gccggacUAAGUGUUGUGGUCGa 5'	:| |:| ||||||||	5' ctgggcaGTCCGC-ACACCAGCc 3'
rno-miR-138-5p	Ceacam1	142	-19.38	2	21	138	159	3' gccGGACUAAGUGUUGUGGUCGa 5'	|||| | || :||||||:	5' tgtCCTG-CTGACTGCACCAGTg 3'
rno-miR-138-5p	Ceacam1	153	-21.38	2	21	745	767	3' gccGGACU-AAGUGUUGUGGUCGa 5'	|:||: || |||||||||	5' cccCTTGGCAGCA-AACACCAGCa 3'
rno-miR-138-5p	Ceacam1	150	-22.2	2	17	628	649	3' gccggacUAAGUGUUGUGGUCGa 5'	:| |:| ||||||||	5' ctgggcaGTCCGC-ACACCAGCc 3'
rno-miR-138-5p	Ceacam1	142	-19.38	2	21	94	115	3' gccGGACUAAGUGUUGUGGUCGa 5'	|||| | || :||||||:	5' tgtCCTG-CTGACTGCACCAGTg 3'
rno-miR-138-5p	Celsr1	148	-19.28	2	14	326	349	3' gccggacuaaGUGUU-GUGGUCGa 5'	||:|: |||||||	5' agtgcaagccCATAGTCACCAGCc 3'
rno-miR-138-5p	Celsr3	148	-20.06	2	22	1415	1439	3' gcCGGACUAAGUGU--UGUGGUCGa 5'	|:||| || | |||||||	5' ctGTCTGTGCCAAATCCCACCAGCc 3'
rno-miR-138-5p	Cenpf	142	-13.26	2	20	848	871	3' gccgGACUAA-GUGUUGUGGUCGa 5'	|| ||| |:| |||:|||	5' tgtgCTCATTAAATATCACTAGCa 3'
rno-miR-138-5p	Cenpm	144	-17.04	2	13	148	170	3' gccggacuaagUGUUGUGGUCGa 5'	|| |||||||	5' cagcagtcgagACCCCACCAGCc 3'
rno-miR-138-5p	Cep350	151	-23.69	2	21	240	263	3' gccGGACUA-AGUGUUGUGGUCGa 5'	|:||:| |||| |||:|||	5' agaCTTGGTATCACCTCACTAGCa 3'
rno-miR-138-5p	Cerk	142	-17.92	2	21	862	887	3' gccGGACUAAG--UG-UUGUGGUCGa 5'	||| | | || : |||||||	5' cgcCCTCAACCCGACTGTCACCAGCg 3'
rno-miR-138-5p	Ces8	141	-19.66	2	18	161	183	3' gccggaCUAAGUGUUGUGGUCGa 5'	| || :|| ||||||:	5' tttgggGCTTAGCACCACCAGTc 3'
rno-miR-138-5p	Cfl1	150	-18.1	2	15	403	425	3' gccggacuaAGUGUUGUGGUCGa 5'	|| | :|||||||	5' aaatgacccTCCCTGCACCAGCt 3'
rno-miR-138-5p	Cftr	151	-24.56	2	16	1421	1443	3' gccggacuAAGUGUUGUGGUCGa 5'	||||:|:|||:|||	5' gttgaattTTCATAGCACTAGCt 3'
rno-miR-138-5p	Cftr	142	-21.56	3	19	1095	1117	3' gccggACUAAGUGUUGUGGUCga 5'	|| ||||:||||||	5' actagTGCAGCACAGCACCAGgt 3'
rno-miR-138-5p	Chaf1a	155	-25.07	3	21	172	195	3' gccGGACUAAGUGUU-GUGGUCga 5'	||||||| ||| ||||||	5' gcaCCTGATTATCAACCACCAGac 3'
rno-miR-138-5p	Chchd8	142	-21.53	2	21	847	868	3' gccGGACUAAGUGUUGUGGUCGa 5'	|||| || |:|||| ||||	5' tgtCCTGCTT-ATAACAGCAGCa 3'
rno-miR-138-5p	Chd6	162	-23.79	2	21	1950	1971	3' gccGGACUAAGUGUUGUGGUCGa 5'	||||: |:| | |||||||	5' ggaCCTGGCTTA-ACCACCAGCa 3'
rno-miR-138-5p	Cherp	148	-27.07	2	22	471	495	3' gcCGGACUAAGU--GUUGUGGUCGa 5'	|||||: | |||:||||||	5' ctGCCTGGGGAAGCCAATACCAGCg 3'
rno-miR-138-5p	Chmp1b	145	-18.77	2	22	1061	1080	3' gcCGGACUAAGUGUUGUGGUCGa 5'	| |||| | : |||||||	5' gaGGCTGA---AAGCCACCAGCc 3'
rno-miR-138-5p	Chn1	142	-24.91	2	21	657	678	3' gccGGACUAAGUGUUGUGGUCGa 5'	|||| ||: ||:|||||	5' atcCCTGTACCAT-ACGCCAGCt 3'
rno-miR-138-5p	Chpf	147	-18.61	2	20	228	250	3' gccgGACUAAGUGUUGUGGUCGa 5'	:| || | :|||:|||||	5' tgtgTTTATGCCTAACGCCAGCc 3'
rno-miR-138-5p	Chrna10	141	-21.31	3	22	29	51	3' gcCGGACUAAGUGUUGUGGUCga 5'	|:| || ||| ||||||	5' cgGTCACATCAACACCACCAGgc 3'
rno-miR-138-5p	Chst14	167	-23.94	2	22	24	48	3' gcCGGA-CUAAG-UGUUGUGGUCGa 5'	|::| ||||: |::||||||||	5' gaGTTTGGATTTAATGACACCAGCt 3'
rno-miR-138-5p	Chuk	142	-20.63	2	22	72	94	3' gcCGG-ACUAAGUGUUGUGGUCGa 5'	||| | ||||| ||||||:	5' aaGCCATTCTTCAC-TCACCAGTc 3'
rno-miR-138-5p	Cidec	141	-21.47	2	14	397	419	3' gccggacuaaGUGUUGUGGUCGa 5'	|||::||||||:	5' agcaacatgcCACGGCACCAGTc 3'
rno-miR-138-5p	Ciita	149	-21.85	2	16	205	226	3' gccggacuAAGUGUUGUGGUCGa 5'	||| :::|||||||	5' gcaggctcTTC-TGGCACCAGCt 3'
rno-miR-138-5p	Ckap4	148	-23.3	2	18	117	140	3' gccggaCUAAGUGU-UGUGGUCGa 5'	|| :|| ||||||||	5' catggaGAGCAGCAGACACCAGCt 3'
rno-miR-138-5p	Clasp1	144	-23.92	2	21	38	60	3' gccGGACUAAGUGUUGUGGUCGa 5'	:|||| |:| ||:||||	5' gccTCTGAGACGCTCCATCAGCt 3'
rno-miR-138-5p	Clca3	141	-19.19	2	21	338	358	3' gccGGACUAAGUGUUGUGGUCGa 5'	|:||: | :||||:||||	5' gacCTTGGAT--TAACATCAGCa 3'
rno-miR-138-5p	Clcn7	159	-23.35	2	20	159	181	3' gccgGACUAAGUGUUGUGGUCGa 5'	:||:||:||| ||:||||	5' gcagTTGGTTTACATCATCAGCa 3'
rno-miR-138-5p	Cldn12	158	-21.66	2	21	1218	1239	3' gccGGACUAAGUGUUGUGGUCGa 5'	||| | :||| |||||||	5' caaCCT-ACGTACACCACCAGCg 3'
rno-miR-138-5p	Cldn12	156	-18.22	2	21	1986	2007	3' gccGGACU-AAGUGUUGUGGUCGa 5'	::||| ||:|| |||||||	5' gctTTTGACTTTAC--CACCAGCa 3'
rno-miR-138-5p	Cldn12	147	-24.16	2	22	416	441	3' gcCGGAC-UAAGUGU--UGUGGUCGa 5'	||:|| |||||| :||||||	5' gtGCTTGTCTTCACACTCTACCAGCc 3'
rno-miR-138-5p	Cldn17	175	-29.81	2	22	1	21	3' gcCGGACUAAGUGUUGUGGUCGa 5'	||:|| ||: ||||||||||	5' -gGCTTGCTTT-CAACACCAGCt 3'
rno-miR-138-5p	Cldn19	142	-16.94	2	17	250	271	3' gccggacUAAGUGUUGUGGUCGa 5'	|||:|: ||||:|||	5' tatcagaATTTAT-ACACTAGCt 3'
rno-miR-138-5p	Cldn22	142	-19.9	2	19	259	281	3' gccggACUAAGUGUUGUGGUCGa 5'	||| || ::||||||:	5' gactgTGACACAGGGCACCAGTa 3'
rno-miR-138-5p	Cldn4	148	-28.73	3	22	842	865	3' gcCGGACUA-AGUGUUGUGGUCga 5'	|:||||| ||: :||||||	5' ggGTCTGATGGCATTGCACCAGgg 3'
rno-miR-138-5p	Clec16a	143	-18.78	2	22	1039	1063	3' gcCGGACUAAG-UGU-UGUGGUCGa 5'	|||| || ::: |||||||	5' caGCCTTCCTCTGTGTTCACCAGCc 3'
rno-miR-138-5p	Clec1a	163	-21.73	2	22	33	54	3' gcCGGACUAAGUGUUGUGGUCGa 5'	|:| | |||| | |||||||	5' agGTCAGCTTCA-ACCACCAGCa 3'
rno-miR-138-5p	Clec1a	140	-26.71	2	21	1485	1508	3' gccGGACUAAGUGUUGUGGU-CGa 5'	|:| :||||:|:||||| ||	5' ggtCTTTGTTCATAGCACCATGCc 3'
rno-miR-138-5p	Clec5a	140	-17.72	2	17	18	40	3' gccggacUAAGUGUUGUGGUCGa 5'	|||:|||: ||||||	5' agtgaatATTTACAGAACCAGCa 3'
rno-miR-138-5p	Clic5	152	-18.4	2	14	4116	4139	3' gccggacuaaGUGU-UGUGGUCGa 5'	|||| :|||||||	5' ccactatcacCACATGCACCAGCa 3'
rno-miR-138-5p	Clic5	145	-17.9	2	20	1037	1058	3' gccgGACUAAGUGUUGUGGUCGa 5'	| || || :||||:||||	5' agagCAGACTC-TAACATCAGCc 3'
rno-miR-138-5p	Clip1	140	-15.56	2	9	41	63	3' gccggacuaaguguuGUGGUCGa 5'	|||||||	5' ccctcagcagctttcCACCAGCg 3'
rno-miR-138-5p	Clip2	149	-17.18	2	22	929	949	3' gcCGGACUAAGUGUUGUGGUCGa 5'	|| ||| | :||||||||	5' gaGCACCATT-A-GACACCAGCa 3'
rno-miR-138-5p	Cln5	145	-16.3	2	20	13	39	3' gccgGAC--UAAGUGUU--GUGGUCGa 5'	||| | || | | |||||||	5' gctgCTGCTACTCTCCATCCACCAGCa 3'
rno-miR-138-5p	Cln5	144	-15.78	2	13	1176	1198	3' gccggacuaagUGUUGUGGUCGa 5'	|:: |||||||	5' ctatgcaccgaATGTCACCAGCc 3'
rno-miR-138-5p	Cln5	143	-16.49	2	21	884	903	3' gccGGACUAAGUGUUGUGGUCGa 5'	||| ||| :|||||:|||	5' ttcCCT-ATT--TAACACTAGCa 3'
rno-miR-138-5p	Clns1a	141	-18.84	2	21	505	525	3' gccGGACUAAGUGUUGUGGUCGa 5'	|| |||:|| ||:||||	5' cctCCGCATTTAC--CATCAGCt 3'
rno-miR-138-5p	Clns1a	140	-16.76	2	9	131	153	3' gccggacuaaguguuGUGGUCGa 5'	|||||||	5' gagacagcaagctgtCACCAGCa 3'
rno-miR-138-5p	Clspn	151	-15.61	2	20	848	870	3' gccgGACUAAGUGUUGUGGUCGa 5'	:|| ||: : |||||||	5' ttagTTGCTTTCTTCCACCAGCc 3'
rno-miR-138-5p	Clstn1	157	-21.28	2	22	264	286	3' gcCGGACUAAGUGUUGUGGUCGa 5'	||| |: | :||||||||	5' caGCCAGGGAGAGGACACCAGCa 3'
rno-miR-138-5p	Cml1	161	-24.31	2	22	103	125	3' gcCGGACUAAGUGUUGUGGUCGa 5'	||:|| | | ||||||||	5' aaGCTTGTTGCTGCACACCAGCt 3'
rno-miR-138-5p	Cmtm3	140	-18.74	2	9	316	338	3' gccggacuaaguguuGUGGUCGa 5'	|||||||	5' cacagcaggctgggcCACCAGCc 3'
rno-miR-138-5p	Cndp1	150	-20.39	2	22	734	754	3' gcCGGACUAAGUGUUGUGGUCGa 5'	||:| || |:|||:|||||	5' aaGCTT--TTAATAACGCCAGCg 3'
rno-miR-138-5p	Cnga4	145	-14.94	2	20	147	172	3' gccgGACUAAGUGU-U--GUGGUCGa 5'	:| | || || | |||||||	5' tccaTTAAATCCCATACTCACCAGCa 3'
rno-miR-138-5p	Cnot8	163	-19.55	2	20	166	188	3' gccgGACUAAGUGUUGUGGUCGa 5'	||| ||| :: |||||||	5' tctgCTGCTTCCTGCCACCAGCa 3'
rno-miR-138-5p	Cnpy2	147	-18.31	2	12	7	29	3' gccggacuaaguGUUGUGGUCGa 5'	| ||||||||	5' ggagcaagcagcCCACACCAGCt 3'
rno-miR-138-5p	Cnr2	141	-19.99	3	20	74	98	3' gccgGAC-UAAGUGU-UGUGGUCga 5'	||| |||| | |||||||	5' gtagCTGTCTTCAGATACACCAGaa 3'
rno-miR-138-5p	Cntn2	147	-20.31	2	21	554	579	3' gccGGACUAAGUGU---UGUGGUCGa 5'	|| ||| | | :|||||||	5' ccaCCCGATGGAAAGGGGCACCAGCc 3'
rno-miR-138-5p	Col11a2	140	-23.2	2	21	544	566	3' gccGGACUAAGUGUUGUGGUCGa 5'	|||| ||| :|| |||||	5' tccCCTGCCTCAGGACTCCAGCc 3'
rno-miR-138-5p	Col12a1	140	-22.16	2	19	185	206	3' gccggACUAAGUGUUGUGGUCGa 5'	||: ||||||||| |||	5' acaaaTGG-TCACAACACAAGCt 3'
rno-miR-138-5p	Col1a1	163	-22.19	2	20	467	489	3' gccgGACUAAGUGUUGUGGUCGa 5'	|||| ||:: |||||||	5' aatgCTGAATCGTCCCACCAGCc 3'
rno-miR-138-5p	Col4a1	159	-19.51	2	21	775	798	3' gccGGACUA-AGUGUUGUGGUCGa 5'	|| || | | |||||||||	5' ccaCCGAATGTGAAAACACCAGCc 3'
rno-miR-138-5p	Col4a1	149	-23.3	3	18	753	775	3' gccggaCUAAGUGUUGUGGUCga 5'	|:||: |||||||||	5' tcacagGGTTTCCAACACCAGgc 3'
rno-miR-138-5p	Col4a2	140	-14.43	2	9	796	818	3' gccggacuaaguguuGUGGUCGa 5'	|||||||	5' catctctctagtcctCACCAGCa 3'
rno-miR-138-5p	Col4a3bp	150	-21.81	2	21	1701	1722	3' gccGGACUAAGUGUUGUGGUCGa 5'	|| | ||:||| ||||||:	5' gcaCCAG-TTTACATCACCAGTt 3'
rno-miR-138-5p	Colec11	152	-18.49	2	21	31	52	3' gccGGACUAAGUGUU-GUGGUCGa 5'	||| ||:::|: |||||||	5' ctaCCT--TTTGTAGCCACCAGCa 3'
rno-miR-138-5p	Commd10	147	-17.96	2	22	126	147	3' gcCGGACUAAGUGUUGUGGUCGa 5'	|:|| | || ||||||||:	5' gcGTCTTAGACA-AACACCAGTg 3'
rno-miR-138-5p	Commd2	141	-16.5	2	22	1185	1207	3' gcCGGACUAAGUGUUGUGGUCGa 5'	||: || | :| ||||||:	5' gaGCTGGACTGGCCCCACCAGTa 3'
rno-miR-138-5p	Comt	142	-21.73	2	21	541	562	3' gccGGACUAAGUGUUGUGGUCGa 5'	:| || |: ||:|:|||||	5' gcaTCGGAGTT-CAGCGCCAGCc 3'
rno-miR-138-5p	Coq10b	145	-18.06	2	14	48	70	3' gccggacuaaGUGUUGUGGUCGa 5'	||: |||||||	5' tttaagaagcCATTTCACCAGCt 3'
rno-miR-138-5p	Coq9	154	-27.49	2	21	671	695	3' gccGGACU-AAGUGU-UGUGGUCGa 5'	||||: ||||| |||||||:	5' gaaCCTGGCATCACAGACACCAGTg 3'
rno-miR-138-5p	Coq9	147	-18.35	3	21	179	202	3' gccGGACU-AAGUGUUGUGGUCga 5'	|:| | ||| :||||||||	5' cttCTTCAGTTCCTAACACCAGgc 3'
rno-miR-138-5p	Coro2b	150	-25	2	21	244	270	3' gccGGACU-AAGU---GUUGUGGUCGa 5'	||||| ||:| :||||||||:	5' cctCCTGACTTTATGCTAACACCAGTt 3'
rno-miR-138-5p	Coro2b	146	-21.84	2	20	946	969	3' gccgGAC-UAAGUGUUGUGGUCGa 5'	||| | | |||||||||:	5' tccaCTGTCTGCCCAACACCAGTa 3'
rno-miR-138-5p	Coro6	140	-31.09	2	22	52	75	3' gcCG-GACUAAGUGUUGUGGUCGa 5'	|| | |||| :||:|:||:||	5' gcGCACCGATTGGCAGCGCCGGCt 3'
rno-miR-138-5p	Coro7	154	-20.04	2	21	378	399	3' gccGGACUAAGUGUUGUGGUCGa 5'	|:|| | || :|||||||	5' tatCTTGCCT-ACCGCACCAGCc 3'
rno-miR-138-5p	Cotl1	158	-24.29	2	15	49	71	3' gccggacuaAGUGUUGUGGUCGa 5'	||||: |||||||	5' actgccaccTCACGTCACCAGCc 3'
rno-miR-138-5p	Cpg1	142	-18.93	2	21	290	311	3' gccGGACUAAGUGUUGUGGUCGa 5'	:||| | | |||||||	5' aatTCTG-TGCTATCCACCAGCt 3'
rno-miR-138-5p	Cplx3	146	-19.38	2	20	1522	1545	3' gccgGACUAAGUGU-UGUGGUCGa 5'	| || |: | :|||||||	5' gtaaCAGAGGCGGAGGCACCAGCa 3'
rno-miR-138-5p	Cpm	152	-17.57	2	22	835	859	3' gcCGGACUAAGUGUU--GUGGUCGa 5'	||| :| ||: | |||||||	5' ttGCCAAGTCCATCATCCACCAGCa 3'
rno-miR-138-5p	Cpm	151	-27.17	2	22	3361	3390	3' gcCGGAC-UAAGUGU------UGUGGUCGa 5'	||||| ||| | | ||||||||	5' ctGCCTGCATTAAAACGGTGCACACCAGCt 3'
rno-miR-138-5p	Cpm	145	-21.34	2	21	2153	2173	3' gccGGACUAAGUGUUGUGGUCGa 5'	|:||:||::| ||:||||	5' gaaCTTGGTTTGC--CATCAGCt 3'
rno-miR-138-5p	Cpsf4	175	-26.45	2	22	357	378	3' gcCGGACUAAGUGUUGUGGUCGa 5'	|||| ||| | |||||||||	5' ggGCCTCATTGA-AACACCAGCa 3'
rno-miR-138-5p	Cpt1b	146	-20.94	2	13	1	20	3' gccggacuaagUGUUGUGGUCGa 5'	|| ||||||||	5' --gaccaggagAC-ACACCAGCt 3'
rno-miR-138-5p	Crat	141	-26.45	2	22	155	177	3' gcCGGACUAAGUGUUGUGGUCGa 5'	|||| :| | ||:|||| ||	5' agGCCTTGTCCTCAGCACCTGCt 3'
rno-miR-138-5p	Creb3l1	148	-19.2	2	20	608	628	3' gccgGACUAAGUGUUGUGGUCGa 5'	||| | | | |||||||	5' ttaaCTGCTCCTC--CACCAGCt 3'
rno-miR-138-5p	Creg1	151	-20.05	2	20	12	31	3' gccgGACUAAGUGUUGUGGUCGa 5'	|||: || ||||||||	5' tgaaCTGGATC---ACACCAGCg 3'
rno-miR-138-5p	Creg1	140	-21.05	2	18	266	289	3' gccggaCUAAGUGU-UGUGGUCGa 5'	|: | ||| |:||||||	5' tcagtaGGGTGACATATACCAGCt 3'
rno-miR-138-5p	Crisp4	160	-20.03	2	22	134	157	3' gcCGGACUAAGUGU-UGUGGUCGa 5'	|| | |||:||| |||:||||	5' aaGCATCATTTACAGACATCAGCa 3'
rno-miR-138-5p	Crispld2	148	-17.2	2	15	961	982	3' gccggacuaAGUGUUGUGGUCGa 5'	| || ||||||||	5' aaccacccaTGAC-ACACCAGCc 3'
rno-miR-138-5p	Cryaa	157	-22.05	2	14	190	212	3' gccggacuaaGUGUUGUGGUCGa 5'	| ||||||||||	5' gtgacccaggCTCAACACCAGCc 3'
rno-miR-138-5p	Csda	148	-19.23	2	14	8	31	3' gccggacuaaGUGUU-GUGGUCGa 5'	|::|| |||||||	5' tcccaggcacCGTAACCACCAGCa 3'
rno-miR-138-5p	Csdc2	143	-22.56	2	21	1382	1405	3' gccGGACU-AAGUGUUGUGGUCGa 5'	||||| |||| | | |||||	5' ggaCCTGAGTTCAAATCTCCAGCa 3'
rno-miR-138-5p	Csde1	143	-20.15	2	20	110	132	3' gccgGACUAAGUGUUGUGGUCGa 5'	:||| :|: |||||||:	5' tctaTTGAGCTATTACACCAGTt 3'
rno-miR-138-5p	Csf1	151	-22.16	2	22	1619	1640	3' gcCGGACUAAGUGUUGUGGUCGa 5'	|:|| || :| |||||||	5' tgGTCT-ATAGGCTCCACCAGCc 3'
rno-miR-138-5p	Csf1r	144	-21.99	2	22	175	198	3' gcCGGA-CUAAGUGUUGUGGUCGa 5'	|||| |||:|| |||||| |	5' taGCCTCTATTTACTACACCAACt 3'
rno-miR-138-5p	Csf2rb	145	-15.7	2	15	2	27	3' gccggacuaAGUGUU---GUGGUCGa 5'	|| ||| |||||||	5' tctccccccTCCCAATCTCACCAGCa 3'
rno-miR-138-5p	Cstf1	143	-24.02	2	21	212	236	3' gccGGACUAAGU--GUUGUGGUCGa 5'	::||:| :: | |||||||	5' gatTTTGGTGTGGTCTTCACCAGCt 3'
rno-miR-138-5p	Ctdspl	147	-25.73	2	22	2552	2573	3' gcCGGACUAAGUGUUGUGGUCGa 5'	||:||| ||| ||:||||	5' ggGCTTGA-AAACATCATCAGCc 3'
rno-miR-138-5p	Ctla2a	143	-28.09	3	22	7	28	3' gcCGGACUAAGUGUUGUGGUCga 5'	||:||||| ::||||:|||	5' tgGCTTGATT-GTAACATCAGaa 3'
rno-miR-138-5p	Ctnnal1	140	-19.94	2	17	961	983	3' gccggacUAAGUGUUGUGGUCGa 5'	:| ::||::||||||	5' agggagcGTGTGCAGTACCAGCg 3'
rno-miR-138-5p	Ctnnbip1	143	-18.88	2	21	761	779	3' gccGGACUAAGUGUUGUGGUCGa 5'	|||| || |||||||	5' acaCCTGCCTC----CACCAGCa 3'
rno-miR-138-5p	Ctsh	152	-18.63	2	13	169	191	3' gccggacuaagUGUUGUGGUCGa 5'	||| |||||||	5' cccatgtgacgACATCACCAGCc 3'
rno-miR-138-5p	Ctsk	145	-21.04	2	21	210	235	3' gccGGAC-UAAG-UGU-UGUGGUCGa 5'	|||| ||| |:| |||||||:	5' gccCCTGTCTTCTATATACACCAGTg 3'
rno-miR-138-5p	Cttn	154	-22.58	2	21	7	31	3' gccGGACUAAG-U-GUUGUGGUCGa 5'	|| || | | ||:|||||||	5' cacCCAGAGCCTACCAGCACCAGCa 3'
rno-miR-138-5p	Cttnbp2nl	150	-18.46	2	17	217	241	3' gccggacUAAG-UGUU-GUGGUCGa 5'	| || |||: |||||||	5' catctcaAGTCAACAGTCACCAGCa 3'
rno-miR-138-5p	Cul1	145	-25.35	2	20	110	137	3' gccgGACU-AAGUGUU----GUGGUCGa 5'	|||| ||||: |||||||	5' aaagCTGAGACCACAGTTTCCACCAGCt 3'
rno-miR-138-5p	Cul2	145	-19.75	2	20	112	136	3' gccgGACUAA-G-UGUUGUGGUCGa 5'	||| || | ||| ||||||:	5' tctgCTGTTTACAACATCACCAGTg 3'
rno-miR-138-5p	Cxcl1	140	-24.36	2	22	44	68	3' gcCGGACUAAG--UGUUGUGGUCGa 5'	||: | ||| |||||||:||:	5' acGCTGGCTTCTGACAACACTAGTt 3'
rno-miR-138-5p	Cxcl12	148	-17.92	2	22	970	994	3' gcCGG--ACUAAGUGUUGUGGUCGa 5'	||| ||| | | |:||:||||	5' aaGCCAATGAATAAAAGCATCAGCa 3'
rno-miR-138-5p	Cxcl12	144	-16.75	2	22	1890	1913	3' gcCGGACUAAGUG-UUGUGGUCGa 5'	||| | | | : |||||||	5' caGCCAGTCCCTCTGTCACCAGCc 3'
rno-miR-138-5p	Cxcl12	151	-19.49	2	22	2150	2171	3' gcCGGACUAAGUGUUGUGGUCGa 5'	|| | | || |||||||||:	5' atGCAT-AGTCTCAACACCAGTg 3'
rno-miR-138-5p	Cxcl12	149	-25.22	2	22	191	213	3' gcCGGACUAAGUGUUGUGGUCGa 5'	||| : :| ||||||||	5' ctGCCCCGGCGGCCACACCAGCt 3'
rno-miR-138-5p	Cxcl12	148	-17.92	2	22	3465	3489	3' gcCGG--ACUAAGUGUUGUGGUCGa 5'	||| ||| | | |:||:||||	5' aaGCCAATGAATAAAAGCATCAGCa 3'
rno-miR-138-5p	Cxcl12	144	-16.75	2	22	4385	4408	3' gcCGGACUAAGUG-UUGUGGUCGa 5'	||| | | | : |||||||	5' caGCCAGTCCCTCTGTCACCAGCc 3'
rno-miR-138-5p	Cxxc1	140	-13.04	2	9	1	12	3' gccggacuaaguguuGUGGUCGa 5'	|||||||	5' -----------aagtCACCAGCc 3'
rno-miR-138-5p	Cyb5r1	144	-19.26	2	21	74	96	3' gccGGACUAAGUGUUGUGGUCGa 5'	||| : | | |:||:||||	5' ggcCCTTGCTGAGAGCATCAGCc 3'
rno-miR-138-5p	Cybrd1	149	-19.97	2	22	2265	2287	3' gcCGGACUAAGUGUUGUGGUCGa 5'	| | |: :::| |||||||	5' atGACAGGCGTGTACCACCAGCc 3'
rno-miR-138-5p	Cygb	140	-17.44	2	22	332	355	3' gcCGGACUAAG-UGUUGUGGUCGa 5'	||:| | || :| :||||||	5' ctGCTTCACTCTGCCCTACCAGCa 3'
rno-miR-138-5p	Cyp11b1	157	-23.23	2	22	15	37	3' gcCGGACUAAGUGUUGUGGUCGa 5'	||| | ||| |||||||	5' ggGCCCTAGTCAGTCCACCAGCc 3'
rno-miR-138-5p	Cyp11b2	141	-21.52	2	22	15	37	3' gcCGGACUAAGUGUUGUGGUCGa 5'	||| | ||| ||||:||	5' ggGCCCTAATCAGTCCACCGGCc 3'
rno-miR-138-5p	Cyp1a1	164	-25.74	2	21	715	737	3' gccGGACUAAGUGUUGUGGUCGa 5'	| ||| |:| ||||||||	5' agtCATGAACCGCTACACCAGCt 3'
rno-miR-138-5p	Cyp26b1	156	-26.65	2	21	622	644	3' gccGGACUAAGUGUUGUGGUCGa 5'	||||: : :||||||||	5' ggcCCTGGGCAGGGACACCAGCa 3'
rno-miR-138-5p	Cyp2a2	151	-15.81	2	18	382	403	3' gccggaCUAAGUGUUGUGGUCGa 5'	|| || :| |||||||	5' acattgGACTC-TATCACCAGCa 3'
rno-miR-138-5p	Cyp3a18	156	-23.98	3	22	53	77	3' gcCGGACUAAGUG--UUGUGGUCga 5'	| ||| ||||| ||||||||	5' gaGACTGTTTCACAGAACACCAGag 3'
rno-miR-138-5p	Cyp4a2	159	-20.82	2	18	286	307	3' gccggaCUAAGUGUUGUGGUCGa 5'	||||| :::|||||||	5' cctaaaGATTC-TGGCACCAGCc 3'
rno-miR-138-5p	Cyp4a3	154	-17.81	2	17	407	428	3' gccggacUAAGUGUUGUGGUCGa 5'	|||| :::|||||||	5' cctaaaaATTC-TGGCACCAGCc 3'
rno-miR-138-5p	Cyp4v3	140	-19.05	2	9	268	290	3' gccggacuaaguguuGUGGUCGa 5'	|||||||	5' tgataacagagcggtCACCAGCc 3'
rno-miR-138-5p	Cyp51	143	-19.73	3	22	1138	1159	3' gcCGGACUAAGUGUUGUGGUCga 5'	| |||| | | :|||||||	5' caGGCTGACT-AAGACACCAGga 3'
rno-miR-138-5p	Cyp8b1	144	-23.35	2	21	236	258	3' gccGGACUAAGUGUUGUGGUCGa 5'	|| |: |||::||||||	5' catCCCGGAGGACAGTACCAGCt 3'
rno-miR-138-5p	Cys1	156	-24.77	2	22	54	77	3' gcCGGACUAAGUGU-UGUGGUCGa 5'	||: || || | :|||||||	5' ggGCTAGAGCCAAAGGCACCAGCt 3'
rno-miR-138-5p	Cyth4	159	-23.66	2	20	1222	1242	3' gccgGACUAAGUGUUGUGGUCGa 5'	|||| || | ||||||||	5' tgagCTGAGTC-C-ACACCAGCt 3'
rno-miR-138-5p	Cyyr1	166	-22.04	2	21	2537	2561	3' gccGGACUAAGU-GUU-GUGGUCGa 5'	|| |||| | ||| |||||||	5' taaCCGGATTAAGCAAGCACCAGCc 3'
rno-miR-138-5p	Cyyr1	153	-15.91	2	18	1132	1154	3' gccggaCUAAGUGUUGUGGUCGa 5'	|| | |||||||||	5' agaaaaGAAAGAGAACACCAGCc 3'
rno-miR-138-5p	Dap	157	-20.04	2	22	582	604	3' gcCGGACUAAGUGUUGUGGUCGa 5'	|| || :||: |||||||	5' gaGCACCATGTACGCCACCAGCc 3'
rno-miR-138-5p	Dapp1	166	-29.93	2	21	233	254	3' gccGGACUAAGUGUUGUGGUCGa 5'	|:||: ||||:|||||||	5' actCTTGG-ACACAGCACCAGCt 3'
rno-miR-138-5p	Dbn1	151	-28.03	2	22	60	81	3' gcCGGACUAAGUGUUGUGGUCGa 5'	||| |: |::||:|:|||||	5' caGCC-GGCTTGCAGCGCCAGCa 3'
rno-miR-138-5p	Dbndd2	146	-23.27	2	21	80	106	3' gccGGACU---AAGUG-UUGUGGUCGa 5'	||||| ||:|| |||:||||	5' agaCCTGACACTTTACTTACATCAGCa 3'
rno-miR-138-5p	Dbx2	147	-14.34	2	20	292	314	3' gccgGACUAAGUGUUGUGGUCGa 5'	|| ||| | |||:||||	5' tatgCTCATTAAATACATCAGCa 3'
rno-miR-138-5p	Dchs1	152	-18.77	2	21	285	307	3' gccGGACUAAGUGUUGUGGUCGa 5'	|:| | | | :|||||||	5' agaCTTCCTGCCCTGCACCAGCa 3'
rno-miR-138-5p	Dclk1	156	-24.83	2	22	513	536	3' gcCGGACUAAG-UGUUGUGGUCGa 5'	| | |:||| |||:||:||||	5' atGACGGGTTCTACAGCATCAGCa 3'
rno-miR-138-5p	Dclk3	163	-28.98	2	22	800	821	3' gcCGGACUAAGUGUUGUGGUCGa 5'	|||||| ||||: ||||||:	5' ctGCCTGA-TCACGCCACCAGTa 3'
rno-miR-138-5p	Dctd	144	-18.27	2	13	246	268	3' gccggacuaagUGUUGUGGUCGa 5'	:| :|||||||	5' ccgagagggagGCTGCACCAGCg 3'
rno-miR-138-5p	Dctd	144	-18.27	2	13	182	204	3' gccggacuaagUGUUGUGGUCGa 5'	:| :|||||||	5' ccgagagggagGCTGCACCAGCg 3'
rno-miR-138-5p	Dcun1d2	146	-18.27	2	11	287	309	3' gccggacuaagugUUGUGGUCGa 5'	|:|||||||	5' tgacgttaaggtgAGCACCAGCc 3'
rno-miR-138-5p	Dcun1d4	152	-20.93	2	18	1026	1049	3' gccggaCU-AAGUGUUGUGGUCGa 5'	|| || | | |||||||	5' gcagtgGACTTGAAACCACCAGCa 3'
rno-miR-138-5p	Dcx	152	-18.15	2	18	525	548	3' gccggaCUAAGU-GUUGUGGUCGa 5'	||| | |||||||||	5' tgttgaGATGGAGAAACACCAGCg 3'
rno-miR-138-5p	Dda1	152	-19.76	2	22	618	644	3' gcCGGACUAAGUGUU----GUGGUCGa 5'	|| | || ::||| |||||||	5' ggGCATCATATGCAAGGCCCACCAGCc 3'
rno-miR-138-5p	Ddah1	149	-17.62	2	20	594	615	3' gccgGACUAAGUGUUGUGGUCGa 5'	|| | | || |||||||	5' acaaCTTCTGC-CACCACCAGCa 3'
rno-miR-138-5p	Ddb1	143	-18.71	2	21	455	479	3' gccGGACUAAG--UGUUGUGGUCGa 5'	|:|| || | ||||:||||	5' tctCTTGCCTCTGAGAACATCAGCc 3'
rno-miR-138-5p	Ddn	156	-17.73	2	22	1001	1025	3' gcCGGACUAA--GUGUUGUGGUCGa 5'	||: || | | | ||||||||	5' gtGCTCGAGTGCCCCTACACCAGCa 3'
rno-miR-138-5p	Ddx19b	148	-20.6	3	21	3747	3769	3' gccGGACUAAGUGUUGUGGUCga 5'	||| ||| : :|||||||	5' ggtCCTCATTAGAGACACCAGat 3'
rno-miR-138-5p	Ddx19b	144	-23.37	2	22	3605	3628	3' gcCGGACUAAGU-GUUGUGGUCGa 5'	| | || |: |||||:||||	5' gaGGCGGAGACGTCAACATCAGCa 3'
rno-miR-138-5p	Ddx3y	144	-23.22	2	21	81	103	3' gccGGACUAAGUGUUGUGGUCGa 5'	|:|| :||| :||||||	5' gaaCTTGCAGTACATTACCAGCt 3'
rno-miR-138-5p	Ddx41	152	-19.61	2	22	39	58	3' gcCGGACUAAGUGUUGUGGUCGa 5'	||| || ::| ||||||||	5' caGCC--ATGTGC-ACACCAGCc 3'
rno-miR-138-5p	Ddx41	140	-17.96	2	21	21	43	3' gccGGACUAAGUGUUGUGGUCGa 5'	|| | || :|||:||||	5' agtCCAGTCCCAGGACATCAGCc 3'
rno-miR-138-5p	Def8	140	-18.71	2	22	1149	1172	3' gcCGGACU-AAGUGUUGUGGUCGa 5'	|| || || |: :||:||||	5' aaGCAGGAGTTGATTGCATCAGCc 3'
rno-miR-138-5p	Dek	144	-20.93	2	21	34	53	3' gccGGACUAAGUGUUGUGGUCGa 5'	:||||||: |:||||||	5' agaTCTGATTT---ATACCAGCa 3'
rno-miR-138-5p	Dennd1a	152	-22.05	2	18	536	559	3' gccggaCUAAG-UGUUGUGGUCGa 5'	|: || : |||||||||	5' ttccagGGCTCGGGAACACCAGCa 3'
rno-miR-138-5p	Depdc5	149	-20.24	2	21	276	296	3' gccGGACUAAGUGUUGUGGUCGa 5'	||| ||: | |||||||	5' ggtCCT--TTTTCCTCACCAGCa 3'
rno-miR-138-5p	Derl1	150	-23.93	2	21	6	27	3' gccGGACUAAGUGUUGUGGUCGa 5'	||||: ::| |||||||	5' agcCCTGGCCTGC-TCACCAGCc 3'
rno-miR-138-5p	Dffa	146	-26.9	2	19	2358	2380	3' gccggACUAAGUGUUGUGGUCGa 5'	|| | |||:||||||:	5' tgtagTGCCTGACAGCACCAGTt 3'
rno-miR-138-5p	Dfna5	150	-13.6	2	17	766	787	3' gccggacUAAGUGUUGUGGUCGa 5'	| |::| ||||||||	5' tttataaAGTTGC-ACACCAGCa 3'
rno-miR-138-5p	Dgcr8	151	-19.96	3	21	51	74	3' gccGGACUAAG-UGUUGUGGUCga 5'	| | |||| |||:||||||	5' cttCATCATTCTACAGCACCAGgc 3'
rno-miR-138-5p	Dgkg	152	-20.08	2	17	1	21	3' gccggacUAAGUGUUGUGGUCGa 5'	|| | |:|||||||	5' --acgatATGCCAAGCACCAGCt 3'
rno-miR-138-5p	Dhps	144	-13.99	2	19	38	59	3' gccggACUAAGUGUUGUGGUCGa 5'	| |||::| |:||||||	5' atttaTTATTTGC-ATACCAGCc 3'
rno-miR-138-5p	Dhx35	150	-22.04	2	21	45	69	3' gccGGACUA-AGUG-UUGUGGUCGa 5'	| || | || | ::|||||||	5' cttCGTGTTGTCTCTGGCACCAGCt 3'
rno-miR-138-5p	Dicer1	142	-19.63	2	21	412	437	3' gccGGA--CUAA-GUGUUGUGGUCGa 5'	||| |:|| | | |||||||:	5' gacCCTGCGGTTCCTCCACACCAGTg 3'
rno-miR-138-5p	Dio1	143	-21.5	2	17	597	620	3' gccggacUAAGUGU-UGUGGUCGa 5'	| ||||| :|:|||||	5' taaaccaAATCACAGGCGCCAGCa 3'
rno-miR-138-5p	Dip2b	155	-26.57	3	21	98	121	3' gccGGAC-UAAGUGUUGUGGUCga 5'	:||| | |||||:||||||	5' gacTCTGCAGTCACAGCACCAGga 3'
rno-miR-138-5p	Diras1	145	-17.19	2	21	188	212	3' gccGGACUAAGUGU---UGUGGUCGa 5'	||| ||| || |||||||	5' ctcCCT-CTTCCCATCCCCACCAGCc 3'
rno-miR-138-5p	Disp2	153	-22.87	2	22	1783	1805	3' gcCGGACUAAGUGUUGUGGUCGa 5'	||:||| : : |||||||	5' gaGCTTGAGGGGGGCCACCAGCt 3'
rno-miR-138-5p	Dkk3	155	-16.34	2	21	585	610	3' gccGGACUAAGU---GUUGUGGUCGa 5'	:|| | ||| | ||||||||	5' ttcTCTCACTCAACCCCACACCAGCc 3'
rno-miR-138-5p	Dlc1	147	-22.11	2	16	265	287	3' gccggacuAAGUGUUGUGGUCGa 5'	||::|:|||:||||	5' gtcgatctTTTGCGACATCAGCg 3'
rno-miR-138-5p	Dlk2	146	-17	2	21	38	59	3' gccGGACUAAGUGUUGUGGUCGa 5'	||| | | :: |||||||	5' tcaCCTCAGAC-TGTCACCAGCc 3'
rno-miR-138-5p	Dlx3	145	-18.99	3	22	426	448	3' gcCGGACUAAGUGUUGUGGUCga 5'	||| || :| |:||||||	5' ctGCCAGAGCTAAAGCACCAGgg 3'
rno-miR-138-5p	Dmbx1	144	-20.11	2	21	895	917	3' gccGGACUAAGUGUUGUGGUCGa 5'	||| : |:: |::||||||	5' tttCCTTGCTTGGAGTACCAGCt 3'
rno-miR-138-5p	Dmrtc1c	144	-20.04	2	22	45	68	3' gcCGGACUAAGUGU-UGUGGUCGa 5'	|: | ||||| | ||||:||	5' ccGTGTTATTCAGACCCACCGGCt 3'
rno-miR-138-5p	Dnaja3	146	-17.36	2	11	1	14	3' gccggacuaagugUUGUGGUCGa 5'	|:|||||||	5' ---------atggAGCACCAGCc 3'
rno-miR-138-5p	Dnajb13	142	-20.09	3	15	252	274	3' gccggacuaAGUGUUGUGGUCga 5'	|::|||||||||	5' cagagtctcTTGCAACACCAGac 3'
rno-miR-138-5p	Dnajc27	146	-18.74	2	21	2098	2124	3' gccGGACUAA--GUGUU--GUGGUCGa 5'	:|||||| :|:|| ||:||||	5' tttTCTGATTTCTATAATCCATCAGCa 3'
rno-miR-138-5p	Dnajc27	140	-13.69	2	18	2270	2293	3' gccggaCUA-AGUGUUGUGGUCGa 5'	||| |:| | ||:||||	5' agttgaGATCTTAGACCATCAGCa 3'
rno-miR-138-5p	Dnajc5g	153	-19.37	2	22	466	488	3' gcCGGACUAAGUGUUGUGGUCGa 5'	|| | |: :|:|||||||	5' ctGCATACCTTTTAGCACCAGCc 3'
rno-miR-138-5p	Dnm1	146	-17.09	2	18	509	529	3' gccggaCUAAGUGUUGUGGUCGa 5'	||| :| :|||||||	5' caagggGAT--GCTGCACCAGCa 3'
rno-miR-138-5p	Dock6	140	-18.15	2	9	717	739	3' gccggacuaaguguuGUGGUCGa 5'	|||||||	5' gttggcaccaagttcCACCAGCc 3'
rno-miR-138-5p	Dock9	150	-21.78	2	21	1810	1835	3' gccGGACUAAGUG--U-UGUGGUCGa 5'	:| || || | | ||||||||	5' tccTCCGAGTCTCTGACACACCAGCc 3'
rno-miR-138-5p	Dot1l	151	-19.88	2	21	319	342	3' gccGGACUAAG-UGUUGUGGUCGa 5'	|| |:| | |: |||||||	5' cgtCCCGGTGCTATCTCACCAGCa 3'
rno-miR-138-5p	Dph3	154	-18.47	2	21	2362	2383	3' gccGGACUAAGUGUUGUGGUCGa 5'	|:| || | |:|||||||	5' caaCTTTATAGA-AGCACCAGCt 3'
rno-miR-138-5p	Dph3	144	-22.12	2	22	154	173	3' gcCGGACUAAGUGUUGUGGUCGa 5'	||||| | || |||:||||	5' gaGCCTG--TGAC-ACATCAGCc 3'
rno-miR-138-5p	Dpp4	150	-19.95	2	22	2201	2221	3' gcCGGACUAAGUGUUGUGGUCGa 5'	|||| | | ||||||||	5' ccGCCTCA--GAGCACACCAGCa 3'
rno-miR-138-5p	Dpp8	157	-27.6	2	14	992	1014	3' gccggacuaaGUGUUGUGGUCGa 5'	|:||:|||||||	5' gggtacggaaCGCAGCACCAGCg 3'
rno-miR-138-5p	Dpp8	142	-17.09	2	16	573	596	3' gccggacuAAGUGU-UGUGGUCGa 5'	||::|| |||||||:	5' atgttcacTTTGCACACACCAGTa 3'
rno-miR-138-5p	Dpp8	141	-22.25	2	22	2863	2885	3' gcCGGACUAAGUGUUGUGGUCGa 5'	|::|| || |||||:|||:	5' agGTTTGCTTGTCAACATCAGTg 3'
rno-miR-138-5p	Dpp9	143	-25.31	2	21	191	214	3' gccGGAC-UAAGUGUUGUGGUCGa 5'	|||| || :|||:||||| |	5' ggcCCTGAATGTACAGCACCATCc 3'
rno-miR-138-5p	Dpy19l1	160	-18.99	2	22	1954	1977	3' gcCGGACUA-AGUGUUGUGGUCGa 5'	|:|| || | || |||||||	5' gtGTCTTATGTAACTCCACCAGCa 3'
rno-miR-138-5p	Dpy19l1	140	-22.78	2	9	1461	1483	3' gccggacuaaguguuGUGGUCGa 5'	|||||||	5' gtgaggagccggcctCACCAGCc 3'
rno-miR-138-5p	Dpy19l3	141	-21.89	2	22	123	144	3' gcCGGACUAAGUG-UUGUGGUCGa 5'	|||| | |:| |:||:||||	5' acGCCT--TCCGCTAGCATCAGCc 3'
rno-miR-138-5p	Dpysl4	142	-19.81	2	20	723	747	3' gccgGACUAAGUG--UUGUGGUCGa 5'	||| | :|| :|||||:||	5' catgCTGCTGTACCAGACACCGGCc 3'
rno-miR-138-5p	Dpysl5	140	-27.29	2	22	92	115	3' gcCGGACUAAGUGU-UGUGGUCGa 5'	|||||: ::: |||||||:	5' tgGCCTGGGCAGTGCACACCAGTa 3'
rno-miR-138-5p	Dscr3	145	-21.51	2	10	838	860	3' gccggacuaaguguUGUGGUCGa 5'	||||||||	5' agtgagcacgctgcACACCAGCt 3'
rno-miR-138-5p	Dsg1b	152	-19.91	2	21	289	311	3' gccGGACUAAGUGUUGUGGUCGa 5'	|||| ::| |||||||	5' tgcCCTGTAGGGTATCACCAGCa 3'
rno-miR-138-5p	Dtnb	140	-21.04	3	22	522	545	3' gcCG-GACUAAGUGUUGUGGUCga 5'	|| ||| ||: |||||||	5' gaGCGCTGCGGCATCACACCAGgg 3'
rno-miR-138-5p	Dus4l	157	-28.67	2	22	374	394	3' gcCGGACUAAGUGUUGUGGUCGa 5'	|||| ||| :||||||||	5' agGCCT-CCTCA-GACACCAGCt 3'
rno-miR-138-5p	Dusp13	157	-23.13	2	21	94	114	3' gccGGACUAAGUGUUGUGGUCGa 5'	||||| |:::|||||||	5' gtcCCTGA--GATGGCACCAGCa 3'
rno-miR-138-5p	Dusp13	157	-23.13	2	21	996	1016	3' gccGGACUAAGUGUUGUGGUCGa 5'	||||| |:::|||||||	5' gtcCCTGA--GATGGCACCAGCa 3'
rno-miR-138-5p	Dusp13	143	-17.2	2	21	356	379	3' gccGGACUA-AGUGUUGUGGUCGa 5'	|| |:| || | ::||||||	5' agtCCAGGTGTCCCCGTACCAGCc 3'
rno-miR-138-5p	Dusp6	150	-19.43	2	21	87	114	3' gccGGACUA-AGUGUU----GUGGUCGa 5'	|| |:| ||| || |||||||	5' gccCCAGGTGTCAAAAATGTCACCAGCt 3'
rno-miR-138-5p	Dusp7	140	-24.26	3	22	9	34	3' gcCGGACUAA---GUGUUGUGGUCga 5'	||: || | |:||:||||||	5' gcGCTCGAATAGGCGCAGCACCAGgg 3'
rno-miR-138-5p	Duxbl	145	-22.32	2	22	767	790	3' gcCGGACUAAGUGUUGUGGU-CGa 5'	| | |||||||| ||||| ||	5' taGACAGATTCACATCACCATGCc 3'
rno-miR-138-5p	Dvl2	142	-16.89	2	19	117	136	3' gccggACUAAGUGUUGUGGUCGa 5'	||| || |||||||	5' cactgTGACTC---TCACCAGCa 3'
rno-miR-138-5p	Dync1li2	144	-19.51	2	14	1960	1983	3' gccggacuaaGUGUU-GUGGUCGa 5'	|| |: |||||||	5' caggagttgcCAAAGTCACCAGCt 3'
rno-miR-138-5p	Dynlt1	150	-17.4	2	15	35	57	3' gccggacuaAGUGUUGUGGUCGa 5'	|| :| |||||||	5' tctagtccaTCTTACCACCAGCt 3'
rno-miR-138-5p	Dyrk2	151	-19.62	3	20	3039	3061	3' gccgGACUAAGUGUUGUGGUCga 5'	:||:|| || |||||||	5' actaTTGGTTAACTACACCAGga 3'
rno-miR-138-5p	E2f5	149	-15.09	2	19	178	202	3' gccggACUAAGUGUU--GUGGUCGa 5'	| ||| || : |||||||	5' ggggaTAATTAACTGTCCACCAGCa 3'
rno-miR-138-5p	E2f7	148	-16.03	2	17	634	656	3' gccggacUAAGUGUUGUGGUCGa 5'	:| | | :|||||||	5' cagaacaGTCCCCTGCACCAGCg 3'
rno-miR-138-5p	Ebag9	153	-22.51	3	20	123	144	3' gccgGACUAAGUGUUGUGGUCga 5'	|| ||||| ||||||||	5' tgagCT-ATTCAGAACACCAGaa 3'
rno-miR-138-5p	Ebf2	143	-19.62	2	17	2160	2185	3' gccggacUAAGUG---UUGUGGUCGa 5'	|||||| :|||:||||	5' tttgaccATTCACTAGGACATCAGCa 3'
rno-miR-138-5p	Ecel1	151	-26.17	2	14	1095	1116	3' gccggacuaaGUGUUGUGGUCGa 5'	||| ||||||||	5' ctaccgagggCAC-ACACCAGCt 3'
rno-miR-138-5p	Ecel1	146	-26.96	2	22	1563	1585	3' gcCGGACUA-AGUGUUGUGGUCGa 5'	||| |:| |||| |||:|||	5' ggGCCCGGTATCAC-CCACTAGCt 3'
rno-miR-138-5p	Edf1	148	-22.65	2	22	40	66	3' gcCGGACUAAGUG----UUGUGGUCGa 5'	| |||:| | | | |||||||	5' ctGGCTGGTCCCCCAGGACCACCAGCa 3'
rno-miR-138-5p	Ednra	141	-20.27	2	22	1740	1762	3' gcCGGACUAAGUGUUGUGGUCGa 5'	|| || ||| ||||:||	5' agGCGAAATGGACACCACCGGCc 3'
rno-miR-138-5p	Efha1	155	-24.59	2	21	249	274	3' gccGGACUA---AGUGUUGUGGUCGa 5'	|||||| ||: |||||||	5' tcaCCTGATAAGCCATCTCACCAGCg 3'
rno-miR-138-5p	Efhd1	140	-20.28	2	21	751	773	3' gccGGACUAAGUGUUGUGGUCGa 5'	:| |:| : ::|||:||||	5' tctTCCGGTGTCTGACATCAGCt 3'
rno-miR-138-5p	Efhd2	154	-18.23	2	21	788	809	3' gccGGACUAAGUGUUGUGGUCGa 5'	|:||| |: :: |||||||	5' ttcCTTGAGTT-TGTCACCAGCg 3'
rno-miR-138-5p	Efhd2	152	-26.47	2	22	202	226	3' gcCGGACUAAGUGUU--GUGGUCGa 5'	| ||| ||| | |||||||	5' gcGGCTGTGACACCAGCCACCAGCa 3'
rno-miR-138-5p	Efnb3	148	-23.94	2	15	1511	1532	3' gccggacuaAGUGUUGUGGUCGa 5'	||| | |||||||	5' ttggccaccTCA-ATCACCAGCc 3'
rno-miR-138-5p	Efnb3	141	-22.64	2	22	94	116	3' gcCGGACUAAGUGUUGUGGUCGa 5'	||| ||::| ||||:||	5' tgGCCCCCTTTGCCCCACCGGCt 3'
rno-miR-138-5p	Egflam	140	-13.5	2	9	1	8	3' gccggacuaaguguuGUGGUCGa 5'	|||||||	5' ---------------CACCAGCt 3'
rno-miR-138-5p	Ehmt1	164	-25.18	2	22	387	410	3' gcCGGAC-UAAGUGUUGUGGUCGa 5'	||||| :|| :::|||||||	5' caGCCTGTGTTGCTGGCACCAGCc 3'
rno-miR-138-5p	Eid1	151	-18.62	2	22	1082	1108	3' gcCGGAC--UAAGUGUU--GUGGUCGa 5'	||:|| | || ::| |||||||	5' ttGCTTGTTACTCTTGATGCACCAGCa 3'
rno-miR-138-5p	Eif1a	140	-23.79	2	21	342	364	3' gccGGACUAAGUGUUGUGGUCGa 5'	||||:| || ||||| ||	5' agtCCTGGTCCAGCACACCTGCt 3'
rno-miR-138-5p	Eif2s3x	153	-22.38	2	22	311	333	3' gcCGGACUAAGUGUUGUGGUCGa 5'	||:| | ||||||||||:	5' taGCTTCTGTGACAACACCAGTg 3'
rno-miR-138-5p	Eif4ebp1	150	-22.81	2	21	233	254	3' gccGGACUAAGUGUUGUGGUCGa 5'	|||| ||| |:|:|||||	5' ctcCCTGCATCA-AGCGCCAGCg 3'
rno-miR-138-5p	Eif4ebp2	143	-22.9	2	21	491	515	3' gccGGACUAAGUGU--UGUGGUCGa 5'	||||| |::: |||:||||	5' agtCCTGAGACGTGTTACATCAGCc 3'
rno-miR-138-5p	Eif4g2	150	-23.05	2	21	1448	1473	3' gccGGACUA-AGU--GUUGUGGUCGa 5'	:||| | ||| :: |||||||	5' ataTCTGTTCTCAGGTGTCACCAGCt 3'
rno-miR-138-5p	Elavl2	143	-22.05	2	22	916	941	3' gcCGGACU--AAGUGUU-GUGGUCGa 5'	|::| | |||::|| ||||||:	5' tgGTTTCATTTTCGTAATCACCAGTg 3'
rno-miR-138-5p	Elk3	152	-22.17	2	18	1148	1171	3' gccggaCUAA-GUGUUGUGGUCGa 5'	|||| :|:||:||||||	5' agaaacGATTATATAATACCAGCt 3'
rno-miR-138-5p	Elk4	153	-18.59	2	22	4154	4174	3' gcCGGACUAAGUGUUGUGGUCGa 5'	||: || | |: ||||||||	5' atGCTAGAAT-AT-ACACCAGCt 3'
rno-miR-138-5p	Elk4	144	-17.39	2	14	327	350	3' gccggacuaaGUGUU-GUGGUCGa 5'	|| |: |||||||	5' agtcaccgaaCAAAGTCACCAGCc 3'
rno-miR-138-5p	Elof1	160	-21.67	2	21	330	352	3' gccGGACUAAGUGUUGUGGUCGa 5'	||| | ||| |||||||	5' tcaCCTCAGCCACCTCACCAGCa 3'
rno-miR-138-5p	Elovl2	148	-26.25	2	21	1355	1377	3' gccGGACUAAGUGUUGUGGUCGa 5'	|:||:||||:::|||::||	5' gttCTTGGTTCATGGCACTGGCa 3'
rno-miR-138-5p	Elovl2	142	-21.48	2	15	2037	2059	3' gccggacuaAGUGUUGUGGUCGa 5'	||| |::||||||	5' aatggcagcTCAAAGTACCAGCc 3'
rno-miR-138-5p	Elovl3	162	-28.56	2	15	640	662	3' gccggacuaAGUGUUGUGGUCGa 5'	||:||:|||||||	5' caggtggcgTCGCAGCACCAGCa 3'
rno-miR-138-5p	Emb	147	-19.83	2	14	273	294	3' gccggacuaaGUGUUGUGGUCGa 5'	|| :||||||||	5' ggggacagggCA-GACACCAGCa 3'
rno-miR-138-5p	Emp1	141	-22.44	2	21	296	316	3' gccGGACUAAGUGUUGUGGUCGa 5'	|:||: :| |||||||	5' acaCTTGG--GGCCTCACCAGCt 3'
rno-miR-138-5p	Enc1	157	-23.08	2	22	1233	1255	3' gcCGGACUAAGUGUUGUGGUCGa 5'	| |||| | || |||||||:	5' ctGGCTGAGTAACCACACCAGTa 3'
rno-miR-138-5p	Enc1	144	-15.35	2	14	1276	1299	3' gccggacuaaGUGUU-GUGGUCGa 5'	|| |: |||||||	5' tgagtgtaaaCAAAGTCACCAGCc 3'
rno-miR-138-5p	Engase	156	-19.46	2	22	748	771	3' gcCGGA-CUAAGUGUUGUGGUCGa 5'	|:|| |: | |:: |||||||	5' gtGTCTCGGGTGATGCCACCAGCa 3'
rno-miR-138-5p	Entpd6	156	-25.73	2	21	171	193	3' gccGGACUAAGUGUUGUGGUCGa 5'	:||| | ||| ||||:|||	5' ggcTCTGCTACACCACACTAGCt 3'
rno-miR-138-5p	Ep400	148	-29.34	2	21	1054	1076	3' gccGGACUAAGUGUUGUGGUCGa 5'	||||: ||:||:|| ||||	5' gctCCTGGCTCGCAGCAGCAGCa 3'
rno-miR-138-5p	Epb4.1	141	-15.58	2	16	425	446	3' gccggacuAAGUGUUGUGGUCGa 5'	||||: |||||||:	5' acaaaaacTTCAT-ACACCAGTg 3'
rno-miR-138-5p	Epb4.9	153	-21.51	2	15	831	854	3' gccggacuaAGU-GUUGUGGUCGa 5'	||| || |||||||	5' cacgacgccTCACCACCACCAGCc 3'
rno-miR-138-5p	Epc2	142	-21.99	2	21	659	680	3' gccGGACUAAGUGUUGUGGUCGa 5'	:|| |||:|:||:|||||:	5' attTCT-ATTTATAATACCAGTt 3'
rno-miR-138-5p	Epdr1	147	-21.13	2	18	815	836	3' gccggaCUAAGUGUUGUGGUCGa 5'	| ||| |||||:||||	5' gctcacGCTTC-CAACATCAGCt 3'
rno-miR-138-5p	Epha4	158	-24	2	15	1078	1100	3' gccggacuaAGUGUUGUGGUCGa 5'	||| :||||||||	5' acgtgcgtcTCAAGACACCAGCt 3'
rno-miR-138-5p	Ephx2	144	-25.49	2	22	46	69	3' gcCGGACUAAGUGUU-GUGGUCGa 5'	|||| || ||||: || ||||	5' tgGCCTTATCCACAGCCAGCAGCa 3'
rno-miR-138-5p	Epm2a	143	-17.22	2	21	1151	1174	3' gccGGACUAAGUG-UUGUGGUCGa 5'	:| || :|| ||||:||||	5' ctaTCAGAAGTACAAACATCAGCa 3'
rno-miR-138-5p	Eps8	140	-18.18	3	20	846	868	3' gccgGAC-UAAGUGUUGUGGUCga 5'	||| | |:| ||||||||	5' tcaaCTGTAATTA-AACACCAGaa 3'
rno-miR-138-5p	Eps8l2	148	-18.35	2	21	647	669	3' gccGGACUAAGUGUUGUGGUCGa 5'	:|||: | : |||||||	5' atcTCTGGCTATTTCCACCAGCc 3'
rno-miR-138-5p	Erc1	161	-25.61	2	18	141	163	3' gccggaCUAAGUGUUGUGGUCGa 5'	|| |||| |||||||	5' tccgtgGACTCACTCCACCAGCt 3'
rno-miR-138-5p	Erf	143	-19.64	2	22	627	648	3' gcCGGACUAAGUGUUGUGGUCGa 5'	||||| ||| | |||||| |	5' gtGCCTG-TTCCCTACACCACCc 3'
rno-miR-138-5p	Eri1	151	-17.12	2	21	135	158	3' gccGGACUAAG-UGUUGUGGUCGa 5'	|| ||| | :: |||||||	5' acaCCAGATCCTTTGTCACCAGCa 3'
rno-miR-138-5p	Esrp2	161	-27.48	2	22	955	977	3' gcCGGACUAAGUGUUGUGGUCGa 5'	||| : || | ||||||||	5' tgGCCGAGGTCTCCACACCAGCc 3'
rno-miR-138-5p	Ethe1	140	-20.04	2	9	85	107	3' gccggacuaaguguuGUGGUCGa 5'	|||||||	5' tcctacccctactctCACCAGCt 3'
rno-miR-138-5p	Etv5	140	-20.24	3	22	919	943	3' gcCGGACUA--AGUGUUGUGGUCga 5'	||:||:| |: | :||||||	5' ctGCTTGGTGCTTTCTGCACCAGac 3'
rno-miR-138-5p	Evc	141	-17	3	20	656	677	3' gccgGACUAAGUGUUGUGGUCga 5'	||| ||| :| ||||||	5' gacaCTG-TTCCTACCACCAGga 3'
rno-miR-138-5p	Exd1	151	-20.02	2	12	315	337	3' gccggacuaaguGUUGUGGUCGa 5'	||:|||||||	5' acaccaccagttCAGCACCAGCa 3'
rno-miR-138-5p	Exd1	143	-26.56	2	22	305	326	3' gcCGGACUAAGUGUUGUGGUCGa 5'	| || | |||| ||||||:	5' gcGGCT-ACACACACCACCAGTt 3'
rno-miR-138-5p	Exo1	143	-17.99	2	20	303	323	3' gccgGACUAAGUGUUGUGGUCGa 5'	| || | || |||||||	5' agaaCAGA-TGAC-TCACCAGCt 3'
rno-miR-138-5p	Exog	141	-19.99	3	20	2100	2124	3' gccgGAC-UAAGUGU-UGUGGUCga 5'	||| |||| | |||||||	5' gtagCTGTCTTCAGACACACCAGaa 3'
rno-miR-138-5p	Eya3	165	-28.34	2	22	2026	2046	3' gcCGGACUAAGUGUUGUGGUCGa 5'	| ||| ||| ||:|||||||	5' gtGGCTG-TTC-CAGCACCAGCa 3'
rno-miR-138-5p	Ezh2	143	-19.25	2	21	152	176	3' gccGGACUAA--GUGUUGUGGUCGa 5'	::| ||| | : |||||||	5' actTTTTATTGCCTTCTCACCAGCt 3'
rno-miR-138-5p	F11r	149	-21.93	2	19	134	158	3' gccggACU--AAGUGUUGUGGUCGa 5'	||| || |:||||:||||	5' ggataTGAATTTAATAACATCAGCt 3'
rno-miR-138-5p	F2r	155	-16.26	2	18	157	181	3' gccggaCUAA-GUGUU-GUGGUCGa 5'	|||| |:|| |||||||	5' tgtataGATTGGATAATCACCAGCa 3'
rno-miR-138-5p	F2rl2	147	-20.53	2	22	239	260	3' gcCGGACUAAGUGUUGUGGUCGa 5'	||| || | : |||||||	5' caGCCAGA-CCTGGCCACCAGCt 3'
rno-miR-138-5p	F3	162	-26.59	2	21	128	149	3' gccGGACUAAGUGUUGUGGUCGa 5'	::|||||| ||||||:|||	5' tgcTTTGATTC-CAACACTAGCa 3'
rno-miR-138-5p	F8	144	-19.12	2	19	1213	1234	3' gccggACUAAGUGUUGUGGUCGa 5'	||:|| | |:||||:||	5' ctcagTGGTT-AGAGCACCGGCc 3'
rno-miR-138-5p	Fabp3	157	-21.82	2	18	118	140	3' gccggaCUAAGUGUUGUGGUCGa 5'	||| :: :||||||||	5' cctggaGATATGGGACACCAGCc 3'
rno-miR-138-5p	Fads1	145	-22.78	2	22	1540	1560	3' gcCGGACUAAGUGUUGUGGUCGa 5'	|:|||: || ||:||||||	5' caGTCTGG-GCA-AATACCAGCg 3'
rno-miR-138-5p	Faf1	142	-19.62	2	22	55	75	3' gcCGGACUAAGUGUUGUGGUCGa 5'	| | |: || : |||||||	5' gaGACGGGCTCCT--CACCAGCc 3'
rno-miR-138-5p	Fam100b	155	-19.59	2	21	529	552	3' gccGGACUAAGUGUU-GUGGUCGa 5'	|:|| | ||| |||||||	5' aaaCTTGTCACCCAATCACCAGCa 3'
rno-miR-138-5p	Fam100b	145	-19.05	2	10	385	407	3' gccggacuaaguguUGUGGUCGa 5'	||||||||	5' gggaaggagaaggcACACCAGCc 3'
rno-miR-138-5p	Fam105a	143	-21.14	2	22	1	25	3' gcCGGAC--UAAGUG--UUGUGGUCGa 5'	|:||| || || ||||:||||	5' --GTCTGCCATGGACTGAACATCAGCt 3'
rno-miR-138-5p	Fam107b	151	-19.06	2	20	1869	1891	3' gccgGACUAAGUGUUGUGGUCGa 5'	||| | || :|||||||:	5' gatgCTGTTCCAAGACACCAGTg 3'
rno-miR-138-5p	Fam109b	141	-21.45	3	22	1258	1280	3' gcCGGACUAAGUGUUGUGGUCga 5'	|:|| ||||| ||||:||	5' ttGTCTTTTTCACCACACTAGat 3'
rno-miR-138-5p	Fam116a	145	-14.55	2	19	1880	1903	3' gccggAC-UAAGUGUUGUGGUCGa 5'	|| :|| | |||||||	5' tttaaTGTGTTGTCTCCACCAGCa 3'
rno-miR-138-5p	Fam117b	155	-26.78	2	21	192	215	3' gccGGACU-AAGUGUUGUGGUCGa 5'	|:||: |:: |:|||||||	5' cttCTTGGCCTTGAAGCACCAGCt 3'
rno-miR-138-5p	Fam122c	146	-20.86	2	22	144	168	3' gcCGGACUAAGU---GUUGUGGUCGa 5'	|:||| |||| || ||:||||	5' caGTCTG-TTCAAGTCACCATCAGCg 3'
rno-miR-138-5p	Fam124a	145	-18.22	2	22	72	94	3' gcCGGACUAAGUGUUGUGGUCGa 5'	||| | : | |||||||	5' caGCCATCTGTCCTCCACCAGCa 3'
rno-miR-138-5p	Fam125a	148	-19.19	2	14	153	176	3' gccggacuaaGUGU-UGUGGUCGa 5'	||:| :|||||||	5' ctagcagccaCATATGCACCAGCa 3'
rno-miR-138-5p	Fam12b	140	-15.7	2	9	1	15	3' gccggacuaaguguuGUGGUCGa 5'	|||||||	5' --------aaagtctCACCAGCt 3'
rno-miR-138-5p	Fam134c	141	-17.91	2	20	836	861	3' gccgGACUAAG-UGUU--GUGGUCGa 5'	:| || | | :| |||||||	5' ggtgTTCATCCTAGGAGCCACCAGCt 3'
rno-miR-138-5p	Fam135a	145	-24.23	2	22	1059	1081	3' gcCGGACUAAGUGUUGUGGUCGa 5'	|:||| ||| ||||||:	5' aaGTCTGTTTCCGTTCACCAGTt 3'
rno-miR-138-5p	Fam13b1	155	-20.6	2	21	640	663	3' gccGGACUAAGUG-UUGUGGUCGa 5'	|:| | |:|| : |||||||	5' ggaCTTCAGTTACTGTCACCAGCt 3'
rno-miR-138-5p	Fam13b1	140	-18.53	2	21	561	583	3' gccGGACUAAGUGUUGUGGUCGa 5'	||||| || :||| ||||	5' actCCTGAACCAAGACAACAGCg 3'
rno-miR-138-5p	Fam149b1	153	-20.45	2	16	50	71	3' gccggacuAAGUGUUGUGGUCGa 5'	||||: :|||||||	5' tggaggctTTCAT-GCACCAGCc 3'
rno-miR-138-5p	Fam160b2	143	-26.82	2	22	634	655	3' gcCGGACUAAGUGUUGUGGUCGa 5'	||| |:||| ||:| |||||	5' gtGCCAGGTTC-CAGCTCCAGCt 3'
rno-miR-138-5p	Fam163a	152	-20.27	2	21	2363	2385	3' gccGGACUAAGUGUUGUGGUCGa 5'	|| | | || |||||||	5' tccCCACCTCCTCACCACCAGCc 3'
rno-miR-138-5p	Fam168a	149	-18.16	2	22	838	858	3' gcCGGACUAAGUGUUGUGGUCGa 5'	|| | | |:| ||||||||	5' atGCAT-AACCGC-ACACCAGCc 3'
rno-miR-138-5p	Fam168a	142	-18.3	2	19	3103	3125	3' gccggACUAAGUGUUGUGGUCGa 5'	|| || |||||||	5' aggggTGCCTCTGTTCACCAGCc 3'
rno-miR-138-5p	Fam172a	160	-25.93	3	22	1317	1340	3' gcCGGACUAAGUG-UUGUGGUCga 5'	|:|||| |:|| ||||||||	5' gaGTCTGAGTTACTAACACCAGgg 3'
rno-miR-138-5p	Fam172a	149	-16.72	2	14	2056	2078	3' gccggacuaaGUGUUGUGGUCGa 5'	|| | |||||||	5' cacagcatccCAGATCACCAGCt 3'
rno-miR-138-5p	Fam175b	157	-20.4	2	22	699	721	3' gcCGGACUAAGUGUUGUGGUCGa 5'	| ||| | :| :|||||||	5' gcGACTGCTGGGCTGCACCAGCa 3'
rno-miR-138-5p	Fam176a	150	-23.33	2	21	219	237	3' gccGGACUAAGUGUUGUGGUCGa 5'	||||: || ||||||||	5' ccaCCTGG---AC-ACACCAGCc 3'
rno-miR-138-5p	Fam176a	144	-29.02	2	22	99	124	3' gcCGGACU---AAGUGUUGUGGUCGa 5'	||| || | || |:|:|||||	5' tgGCCGGAGAGTGCAGAGCGCCAGCc 3'
rno-miR-138-5p	Fam185a	147	-19.5	3	22	319	340	3' gcCGGACUAAGUGUUGUGGUCga 5'	|:| | ||: |||||||||	5' ctGTCCGCTTT-CAACACCAGag 3'
rno-miR-138-5p	Fam19a5	144	-23.35	2	22	259	282	3' gcCGGACUAAGU-GUUGUGGUCGa 5'	||: ||||| | |||:|||	5' cgGCTACATTCATCCTCACTAGCc 3'
rno-miR-138-5p	Fam53b	143	-25.44	2	21	2624	2647	3' gccGGACU-AAGUGUUGUGGUCGa 5'	||||| |||| ::|| ||||	5' tgaCCTGAGTTCAGGGCAGCAGCc 3'
rno-miR-138-5p	Fam55b	142	-20.5	2	17	141	162	3' gccggacUAAGUGUUGUGGUCGa 5'	|||| | ||:|||||	5' ataaggcATTC-CTACGCCAGCc 3'
rno-miR-138-5p	Fam64a	144	-15.61	3	21	447	469	3' gccGGACUAAGUGUUGUGGUCga 5'	:||| | | || ||||||	5' cttTCTGCTCCCCACCACCAGaa 3'
rno-miR-138-5p	Fam71b	146	-20.5	2	11	34	56	3' gccggacuaagugUUGUGGUCGa 5'	|:|||||||	5' cagggctcagaggAGCACCAGCg 3'
rno-miR-138-5p	Fam96b	164	-22.84	2	22	1	22	3' gcCGGACU-AAGUGUUGUGGUCGa 5'	|||||: ||: | |||||||	5' --GCCTGGCTTTTGACCACCAGCc 3'
rno-miR-138-5p	Fanca	154	-24.19	2	21	3	24	3' gccGGACUAAGUGUUGUGGUCGa 5'	|| | ||| ::|||||||	5' gcaCCGGTCTCA-GGCACCAGCc 3'
rno-miR-138-5p	Fas	144	-23.21	2	22	67	90	3' gcCGGACUAAGU-GUUGUGGUCGa 5'	||| | || |:|||||:||	5' aaGCCAACTGCATCGACACCGGCa 3'
rno-miR-138-5p	Fat2	151	-19.23	2	18	304	325	3' gccggaCUAAGUGUUGUGGUCGa 5'	| | || |:|||||||	5' gaaagaGCTCCA-AGCACCAGCt 3'
rno-miR-138-5p	Fat4	146	-21.09	2	22	34	54	3' gcCGGACUAAGUGUUGUGGUCGa 5'	|: ||: |: | |||||||	5' tgGTGTGGCTTCC--CACCAGCg 3'
rno-miR-138-5p	Fbxl4	147	-22.2	2	22	664	685	3' gcCGGACUAAGUGUUGUGGUCGa 5'	||| || | :| ||:|||||	5' ttGCCAGACTGGC-ACGCCAGCt 3'
rno-miR-138-5p	Fbxl4	145	-17.01	2	20	7	28	3' gccgGACUAAGUGUUGUGGUCGa 5'	| |: || | |||||||	5' cttgCAGGCTC-CTCCACCAGCa 3'
rno-miR-138-5p	Fbxl7	149	-17.32	2	21	1139	1159	3' gccGGACUAAGUGUUGUGGUCGa 5'	:||| || :: |||||||	5' acaTCTG--TCCTGCCACCAGCa 3'
rno-miR-138-5p	Fbxo21	149	-19.09	2	14	114	136	3' gccggacuaaGUGUUGUGGUCGa 5'	||| |||||||	5' acaggacagcCACTTCACCAGCa 3'
rno-miR-138-5p	Fbxo46	144	-19.77	2	21	61	83	3' gccGGACUAAGUGUUGUGGUCGa 5'	|| |: :: : |||||||	5' ggaCCAGGACTGAGTCACCAGCc 3'
rno-miR-138-5p	Fbxo46	140	-14.75	2	9	298	320	3' gccggacuaaguguuGUGGUCGa 5'	|||||||	5' tccaccccagagaccCACCAGCa 3'
rno-miR-138-5p	Fbxw5	157	-30.6	3	22	162	184	3' gcCGGACUAAGUGUUGUGGUCga 5'	|||| :|| :||:||||||	5' agGCCTTGTTGGCAGCACCAGag 3'
rno-miR-138-5p	Fbxw8	149	-21.2	2	22	3028	3048	3' gcCGGACUAAGUGUUGUGGUCGa 5'	||| |:|| | ||||:||||	5' gtGCCAGGTT-A-AACATCAGCc 3'
rno-miR-138-5p	Fcer1a	140	-19.05	2	22	157	181	3' gcCGGACUAAGU--GUUGUGGUCGa 5'	||:| ||| | ||||| ||||	5' atGCTTCATTAAACCAACAGCAGCt 3'
rno-miR-138-5p	Fem1c	167	-25.1	2	22	60	84	3' gcCG-GACUA-AGUGUUGUGGUCGa 5'	|| ||| | | |:|||||||||	5' gaGCACTGTTGTGATAACACCAGCa 3'
rno-miR-138-5p	Fem1c	150	-22.06	2	21	2650	2671	3' gccGGACUAAGUGUUGUGGUCGa 5'	||| |||| :|||||||:	5' tgtCCTTTTTCA-GACACCAGTc 3'
rno-miR-138-5p	Fermt2	140	-15.37	2	9	588	610	3' gccggacuaaguguuGUGGUCGa 5'	|||||||	5' atcactcttagtgttCACCAGCa 3'
rno-miR-138-5p	Fes	160	-27.27	2	21	68	90	3' gccGGACUAAGUGUUGUGGUCGa 5'	||||: |: ||||||:|||	5' agaCCTGGGTTCCAACACTAGCa 3'
rno-miR-138-5p	Fgd1	141	-26.11	2	21	344	366	3' gccGGA-CUAAGUGUUGUGGUCGa 5'	||| |||||| |:::|||||	5' agaCCTGGATTCA-AGTGCCAGCt 3'
rno-miR-138-5p	Fgd3	157	-23.69	2	22	252	274	3' gcCGGACUAAGUGUUGUGGUCGa 5'	| |||| | |::||:|||||	5' caGGCTGAGTGATGACGCCAGCc 3'
rno-miR-138-5p	Fgd3	154	-26.7	2	21	180	201	3' gccGGACUAAGUGUUGUGGUCGa 5'	:|||: || ||||:|||||	5' gctTCTGGCTC-CAACGCCAGCa 3'
rno-miR-138-5p	Fibcd1	140	-18.84	2	22	983	1007	3' gcCGGACU--AAGUGUUGUGGUCGa 5'	|:|| | ||| ||||||| ||	5' ttGTCTAACCTTCTCAACACCTGCa 3'
rno-miR-138-5p	Ficd	140	-12.57	2	9	1	9	3' gccggacuaaguguuGUGGUCGa 5'	|||||||	5' --------------cCACCAGCc 3'
rno-miR-138-5p	Fitm2	150	-21.66	2	21	3312	3336	3' gccGGAC-UAAG-UGUUGUGGUCGa 5'	| || |||| | |||||||	5' ctcCATGCATTCTTCTTCACCAGCt 3'
rno-miR-138-5p	Fitm2	144	-20.27	3	21	1053	1075	3' gccGGACUAAGUGUUGUGGUCga 5'	|:| | || :|:||||||	5' tgcCTTTAATCCTAGCACCAGga 3'
rno-miR-138-5p	Fkbp5	155	-24.7	2	22	1084	1105	3' gcCGGACUAAGUGUUGUGGUCGa 5'	||||| | :|| |||:||||	5' gaGCCTG-TATACTACATCAGCc 3'
rno-miR-138-5p	Fkbp5	145	-20.82	2	19	1214	1237	3' gccggACUAAGUGU-UGUGGUCGa 5'	||: ||| |||||||	5' ccctgTGGGGAACACCCACCAGCc 3'
rno-miR-138-5p	Fkbp5	143	-22.22	2	21	1619	1642	3' gccGGACUAAGU-GUUGUGGUCGa 5'	|:||: | | |||||||	5' taaCTTGGGCGACCCTCACCAGCt 3'
rno-miR-138-5p	Fkbp9	140	-20.01	2	22	411	434	3' gcCGGACUAAGU-GUUGUGGUCGa 5'	|| |||||| ::||| ||||	5' caGCAAGATTCATTGACAGCAGCc 3'
rno-miR-138-5p	Flrt1	144	-19.71	2	14	1883	1907	3' gccggacuaaGUGUU--GUGGUCGa 5'	| ||| |||||||	5' aaacggagacCCCAACCCACCAGCc 3'
rno-miR-138-5p	Flrt1	140	-20.65	2	14	1085	1108	3' gccggacuaaGUGU-UGUGGUCGa 5'	|||| |||:||||	5' tatgtgtgcaCACACACATCAGCt 3'
rno-miR-138-5p	Flrt1	140	-20.43	3	22	2295	2319	3' gcCGGACUA--AGUGUUGUGGUCga 5'	||| || |:: ||||||||	5' ggGCCAAATGCTTGAAACACCAGgg 3'
rno-miR-138-5p	Flywch1	141	-28.01	2	22	969	991	3' gcCGGACUAAGUGUUGUGGUCGa 5'	|||||:| | :| |||::||	5' tgGCCTGGTGCCTACCACTGGCt 3'
rno-miR-138-5p	Fmo2	161	-22.5	2	21	211	231	3' gccGGACUAAGUGUUGUGGUCGa 5'	:||| | |:|||||||||	5' tatTCTG--TAATAACACCAGCa 3'
rno-miR-138-5p	Fmod	148	-19.45	2	22	1168	1191	3' gcCGGACU-AAGUGUUGUGGUCGa 5'	||: || ||:| :::||||||	5' aaGCTAGAGTTTAAGGTACCAGCt 3'
rno-miR-138-5p	Fmr1	142	-19.79	2	21	681	702	3' gccGGACUAAGUGUUGUGGUCGa 5'	||| | :| ||||:||||	5' tttCCTTACATA-AACATCAGCt 3'
rno-miR-138-5p	Fndc8	144	-15.26	2	20	105	125	3' gccgGACUAAGUGUUGUGGUCGa 5'	|| :|| | |||||||	5' accaCTAGTTATC--CACCAGCc 3'
rno-miR-138-5p	Foxc1	173	-23.9	2	18	110	132	3' gccggaCUAAGUGUUGUGGUCGa 5'	||||||: ||||||||	5' tgagaaGATTCATCACACCAGCg 3'
rno-miR-138-5p	Foxc1	163	-24.54	2	21	142	166	3' gccGGAC--UAAGUGUUGUGGUCGa 5'	|||| ||||| |||||||	5' tctCCTGAAATTCAACTCACCAGCa 3'
rno-miR-138-5p	Foxh1	151	-16.61	3	20	83	105	3' gccgGACUAAGUGUUGUGGUCga 5'	| | |||| ||||||||	5' gcaaCAGCTTCAAAACACCAGgc 3'
rno-miR-138-5p	Foxi1	158	-19.84	2	17	786	810	3' gccggacUA-AGUG-UUGUGGUCGa 5'	|| |||: |||||||||	5' cacaaaaATCTCATAAACACCAGCt 3'
rno-miR-138-5p	Foxn1	149	-20.33	2	20	523	544	3' gccgGACUAAGUGUUGUGGUCGa 5'	|| || | |||||:||||	5' tgagCT-ATGCCCAACATCAGCt 3'
rno-miR-138-5p	Foxn1	142	-18.24	2	21	285	309	3' gccGGACUA-AGU-GUUGUGGUCGa 5'	| || | || | |||||||	5' ctcCATGTTGCCACCCCCACCAGCa 3'
rno-miR-138-5p	Foxp4	162	-22.68	2	21	32	59	3' gccGGAC-UAAGUGUU----GUGGUCGa 5'	|||| |||| ||| |||||||	5' ctcCCTGTATTCCCAACCACCACCAGCa 3'
rno-miR-138-5p	Foxp4	141	-18.1	2	14	65	87	3' gccggacuaaGUGUUGUGGUCGa 5'	| | |||||||	5' agggctctccCTCCCCACCAGCg 3'
rno-miR-138-5p	Fpgs	148	-19.15	2	15	2	23	3' gccggacuaAGUGUUGUGGUCGa 5'	|| | ||||||||	5' caaggagcgTC-CTACACCAGCc 3'
rno-miR-138-5p	Frmd3	140	-24.31	2	18	23	47	3' gccggaCUAAGU--GUUGUGGUCGa 5'	|| || |||||||||:	5' atggtgGACCCATCCAACACCAGTt 3'
rno-miR-138-5p	Frs3	148	-18.32	2	15	37	58	3' gccggacuaAGUGUUGUGGUCGa 5'	|||| |||||||	5' gactccaccTCAC-CCACCAGCc 3'
rno-miR-138-5p	Ftsjd2	165	-27.32	2	22	174	196	3' gcCGGACUAAGUGUUGUGGUCGa 5'	|||||| ::||||||||	5' ctGCCTGAGAGCTGACACCAGCa 3'
rno-miR-138-5p	Ftsjd2	152	-23.04	2	13	645	667	3' gccggacuaagUGUUGUGGUCGa 5'	::|||||||||	5' agaaggtagggGTAACACCAGCc 3'
rno-miR-138-5p	Fut2	140	-11.7	2	9	1	8	3' gccggacuaaguguuGUGGUCGa 5'	|||||||	5' ---------------CACCAGCc 3'
rno-miR-138-5p	Fut2	140	-18.65	2	9	661	683	3' gccggacuaaguguuGUGGUCGa 5'	|||||||	5' gcgagaggcaggtctCACCAGCa 3'
rno-miR-138-5p	Fyco1	156	-18.02	2	15	2758	2779	3' gccggacuaAGUGUUGUGGUCGa 5'	||| |||||||||	5' agaaacacaTCA-AACACCAGCa 3'
rno-miR-138-5p	Fyco1	147	-23.6	2	21	1647	1671	3' gccGGACUAAGUG--UUGUGGUCGa 5'	:|||:||: | |:|||:|||	5' tgtTCTGGTTTTCTGAGCACTAGCt 3'
rno-miR-138-5p	Fzd6	141	-28.94	2	22	1339	1362	3' gcCGGACUAAGUGUUGUG-GUCGa 5'	||:||| ||| |||| ||||	5' agGCTTGAACCACCACACTCAGCt 3'
rno-miR-138-5p	G4	152	-17.68	2	17	179	201	3' gccggacUAAGUGUUGUGGUCGa 5'	||| | : |||||||	5' catcaccATTGAAGTCACCAGCt 3'
rno-miR-138-5p	G6pd	150	-21.45	2	21	525	550	3' gccGGAC--UAA-GUGUUGUGGUCGa 5'	|:|| ||| | | |||||||	5' ctaCTTGACATTCCTCCTCACCAGCt 3'
rno-miR-138-5p	G7c	140	-14.93	2	21	1052	1074	3' gccGGACUAAGUGUUGUGGUCGa 5'	|| | || : |||||||:	5' caaCCCCACTCCTTACACCAGTg 3'
rno-miR-138-5p	Gabbr2	151	-21.11	2	14	387	408	3' gccggacuaaGUGUUGUGGUCGa 5'	||| ||||||||	5' tgcccgccccCAC-ACACCAGCc 3'
rno-miR-138-5p	Gabbr2	144	-17.94	2	21	1366	1388	3' gccGGACUAAGUGUUGUGGUCGa 5'	|:| | | : |||||||	5' gacCTTCAGCCCTCCCACCAGCt 3'
rno-miR-138-5p	Gabrb1	146	-20.48	2	19	199	221	3' gccggACUAAGUGUUGUGGUCGa 5'	||:| || :::||||||	5' tattgTGGTCCAAGGTACCAGCt 3'
rno-miR-138-5p	Galnt2	145	-19.94	2	22	793	815	3' gcCGGACUAAGUGUUGUGGUCGa 5'	|||| :| |||||||	5' ctGCCTCTGGAGCCTCACCAGCc 3'
rno-miR-138-5p	Galntl1	144	-19.91	2	21	1387	1409	3' gccGGACUAAGUGUUGUGGUCGa 5'	|: || | :|| :||||||	5' gctCTGGACTAGCACTACCAGCc 3'
rno-miR-138-5p	Galntl1	144	-20.09	2	21	1527	1546	3' gccGGACUAAGUGUUGUGGUCGa 5'	:|||: || |||||||	5' accTCTGGCTC---TCACCAGCa 3'
rno-miR-138-5p	Galntl1	141	-22.9	3	22	1450	1469	3' gcCGGACUAAGUGUUGUGGUCga 5'	||||| :||| ||||||	5' caGCCTG---TACATCACCAGgt 3'
rno-miR-138-5p	Galntl4	156	-21.27	2	21	1	22	3' gccGGACUAAGUGUUGUGGUCGa 5'	|:| | ||| |||||||	5' -ccCTTCACAGACACCACCAGCc 3'
rno-miR-138-5p	Garnl4	166	-27.01	2	22	1628	1648	3' gcCGGACUAAGUGUUGUGGUCGa 5'	|:||| || ||:|||||||	5' gtGTCTGTTT--CAGCACCAGCt 3'
rno-miR-138-5p	Gas2l1	155	-24.5	2	21	729	752	3' gccGGAC-UAAGUGUUGUGGUCGa 5'	|:|| | |||| |||||||:	5' tgtCTTGTAATCACCACACCAGTt 3'
rno-miR-138-5p	Gas7	156	-24	2	22	3777	3801	3' gcCGGACUAAGUG--UUGUGGUCGa 5'	| || ||| | :||||||||	5' ggGGCTCCTTCCCCAGACACCAGCt 3'
rno-miR-138-5p	Gas7	153	-23.15	2	14	1408	1430	3' gccggacuaaGUGUUGUGGUCGa 5'	|:::||||||||	5' gcatggacccCGTGACACCAGCc 3'
rno-miR-138-5p	Gas7	147	-19.93	2	17	5079	5104	3' gccggacUAAG---UGUUGUGGUCGa 5'	|||| : :||||||||	5' taccgacATTCCAAGGGACACCAGCc 3'
rno-miR-138-5p	Gas7	143	-22.65	2	22	1927	1953	3' gcCGGACU-AAGUGU---UGUGGUCGa 5'	|::||| ||| || ::||||||	5' ccGTTTGAGTTCTCAGTGGTACCAGCt 3'
rno-miR-138-5p	Gas7	140	-24.06	4	22	3548	3571	3' gcCGGACUAAG-UGUUGUGGUcga 5'	|||| ||| |||||||||	5' ttGCCTTTTTCTACAACACCAtgt 3'
rno-miR-138-5p	Gata1	150	-17.06	2	21	354	378	3' gccGGACUA-AGUGUU-GUGGUCGa 5'	||| | |:| |: |||||||	5' ctcCCTCCTCTTAGAGCCACCAGCc 3'
rno-miR-138-5p	Gatad2a	159	-21.93	2	22	195	221	3' gcCGGA---CUAA-GUGUUGUGGUCGa 5'	|||| | || | |:||||||||	5' ttGCCTTTAGTTTGCCCGACACCAGCa 3'
rno-miR-138-5p	Gatc	153	-19.43	2	21	560	582	3' gccGGAC-UAAGUGUUGUGGUCGa 5'	| || || :: |||||||||	5' cacCATGCATATG-AACACCAGCc 3'
rno-miR-138-5p	Gatsl2	141	-16.73	2	21	750	770	3' gccGGACUAAGUGUUGUGGUCGa 5'	||| | : | |||||||	5' acaCCTCCTCTCC--CACCAGCc 3'
rno-miR-138-5p	Gcnt1	148	-21.62	2	22	1511	1534	3' gcCGGACUAAGUGUU-GUGGUCGa 5'	|::|| || :: |||||||	5' gcGTTTGCCACAGGGTCACCAGCg 3'
rno-miR-138-5p	Gdpd2	146	-22.84	2	22	6	26	3' gcCGGACUAAGUGUUGUGGUCGa 5'	||| : || | |||||||	5' ggGCCCAGGTCCC--CACCAGCt 3'
rno-miR-138-5p	Gfap	148	-23.42	2	22	75	100	3' gcCGGACUAAGUGU---UGUGGUCGa 5'	||| |||| || |||||||:	5' agGCCCAATTCCCATCCACACCAGTg 3'
rno-miR-138-5p	Gfap	140	-19.89	2	14	1022	1045	3' gccggacuaaGUGUU-GUGGUCGa 5'	||||| |||:|||	5' cctccatcccCACAACCACTAGCt 3'
rno-miR-138-5p	Gfpt2	147	-21.52	2	21	289	313	3' gccGGACUAAGU--GUUGUGGUCGa 5'	|:| ||:| ||||||:|||	5' aacCTTTTTTTAACCAACACTAGCt 3'
rno-miR-138-5p	Gfra1	148	-20.28	2	21	882	904	3' gccGGACUAAGUGUUGUGGUCGa 5'	:|| || ::|||||:|||	5' tccTCTCATCGGTAACACTAGCt 3'
rno-miR-138-5p	Gfra2	155	-24.97	2	22	678	699	3' gcCGGACUAAGUGUUGUGGUCGa 5'	|||| : |:: ::|||||||	5' aaGCCTTGGTTG-GGCACCAGCt 3'
rno-miR-138-5p	Ggcx	140	-24.17	2	22	328	353	3' gcCGGACUAAGUGUU---GUGGUCGa 5'	|||| : | |||: :||||||	5' tgGCCTTGCTGACAGATTTACCAGCc 3'
rno-miR-138-5p	Ggps1	141	-19.99	3	20	58	82	3' gccgGAC-UAAGUGU-UGUGGUCga 5'	||| |||| | |||||||	5' gtagCTGTCTTCAGACACACCAGaa 3'
rno-miR-138-5p	Gigyf1	145	-19.91	2	22	2	19	3' gcCGGACUAAGUGUUGUGGUCGa 5'	||||| || | |||||||	5' caGCCTG--TC-C--CACCAGCc 3'
rno-miR-138-5p	Gimap7	151	-23.17	2	21	70	93	3' gccGGACUAAGUGUU-GUGGUCGa 5'	||| :|||: |||||||	5' ggcCCTTTCCTACAGCCACCAGCc 3'
rno-miR-138-5p	Gimap7	140	-17.57	3	17	119	141	3' gccggacUAAGUGUUGUGGUCga 5'	||||| :||||||	5' cccaggaATTCAATGCACCAGgg 3'
rno-miR-138-5p	Gins2	148	-18.18	2	22	148	172	3' gcCGGACUAAGUGUU--GUGGUCGa 5'	|:| || | || |||||||	5' ccGTCGAATGGAGAAGCCACCAGCt 3'
rno-miR-138-5p	Git1	149	-23.15	2	22	735	756	3' gcCGGACUAAGUGUU-GUGGUCGa 5'	| ||| ||| :: |||||||	5' ggGACTG--TCAGGGTCACCAGCt 3'
rno-miR-138-5p	Giyd2	153	-23.83	2	21	660	682	3' gccGGAC-UAAGUGUUGUGGUCGa 5'	|:|| :||||| |||:||||	5' gtcCTTGTGTTCAC-ACATCAGCa 3'
rno-miR-138-5p	Gja5	154	-18.8	2	22	689	709	3' gcCGGACUAAGUGUUGUGGUCGa 5'	||: || |::| |||||||	5' ttGCTGGAATTGC--CACCAGCt 3'
rno-miR-138-5p	Gja5	142	-24.88	2	21	535	561	3' gccGGACUA--AGU--GUUGUGGUCGa 5'	|:||:| ||: ||:||:||||	5' gtcCTTGGTCCTCGGCCAGCATCAGCt 3'
rno-miR-138-5p	Gja5	142	-20.77	2	21	827	848	3' gccGGACUAAGUGUUGUGGUCGa 5'	||||: || | :||||||	5' gacCCTGG-CCAGATTACCAGCc 3'
rno-miR-138-5p	Gkap1	140	-14.55	2	17	154	176	3' gccggacUAAGUGUUGUGGUCGa 5'	|| :: ||:||||||	5' aaagaaaATATGGAATACCAGCa 3'
rno-miR-138-5p	Glce	141	-21.16	2	20	1745	1773	3' gccgGACUAAG-----UG-UUGUGGUCGa 5'	||||||: || ||||||||:	5' ggaaCTGATTTTTGTGACAAACACCAGTg 3'
rno-miR-138-5p	Glg1	144	-19.1	2	13	82	104	3' gccggacuaagUGUUGUGGUCGa 5'	::::|||||||	5' cccttctaacgGTGGCACCAGCa 3'
rno-miR-138-5p	Glt8d1	161	-19.91	2	22	210	232	3' gcCGGACUAAGUGUUGUGGUCGa 5'	| | || | | :||||||||	5' agGACAGAATGAGGACACCAGCc 3'
rno-miR-138-5p	Glt8d3	141	-27.4	3	22	4372	4394	3' gcCGGACUAAGUGUUGUGGUCga 5'	|||||: | |||||||	5' tgGCCTGGCAATCTACACCAGgt 3'
rno-miR-138-5p	Gltp	141	-18.7	2	21	600	620	3' gccGGACUAAGUGUUGUGGUCGa 5'	||||| |::: :||||||	5' tctCCTGAATTGT--TACCAGCc 3'
rno-miR-138-5p	Gmfb	145	-17.29	2	22	668	690	3' gcCGGACUAAGUGUUGUGGUCGa 5'	|:|| : |:|:: ||||||:	5' ccGTCTAGGTTATGTCACCAGTa 3'
rno-miR-138-5p	Gna12	158	-22.92	2	22	124	149	3' gcCGGACU-A-AGU-GUUGUGGUCGa 5'	||: || | ||| | ||||||||	5' atGCTGGACTGTCAGCCACACCAGCg 3'
rno-miR-138-5p	Gnai2	166	-28.29	2	21	360	385	3' gccGGACU-AAGU--GUUGUGGUCGa 5'	||||: ||:: ||||||||||	5' accCCTGGCTTTGTCCAACACCAGCc 3'
rno-miR-138-5p	Gnat1	141	-15.64	2	14	297	319	3' gccggacuaaGUGUUGUGGUCGa 5'	|| |||||||	5' ccatcagcagCAGCTCACCAGCa 3'
rno-miR-138-5p	Gng2	151	-19.05	2	22	1090	1111	3' gcCGGACUAAGUGUUGUGGUCGa 5'	|:| || | |:||||:||||	5' ctGTCAGAAT-ATAACATCAGCc 3'
rno-miR-138-5p	Gng2	140	-15.26	2	9	2445	2467	3' gccggacuaaguguuGUGGUCGa 5'	|||||||	5' gtcaaccaccattgtCACCAGCa 3'
rno-miR-138-5p	Gnrhr	164	-26.33	2	17	352	374	3' gccggacUAAGUGUUGUGGUCGa 5'	||||||||||:||||	5' ccaacatATTCACAACATCAGCt 3'
rno-miR-138-5p	Gnrhr	150	-18.78	2	21	750	779	3' gccGGACUAAG----UGUU---GUGGUCGa 5'	:|| |||| |||| |||||||	5' gatTCTTATTCAGCAACAAATCCACCAGCc 3'
rno-miR-138-5p	Golga7	143	-21.51	2	21	448	473	3' gccGGACUAA---GUGUUGUGGUCGa 5'	|| |||| ||:: :||||||	5' tgcCCGGATTCCCCATGCTACCAGCc 3'
rno-miR-138-5p	Gorasp1	155	-19.61	2	22	688	713	3' gcCGGACU-AAG--UGUUGUGGUCGa 5'	|||| | | | |:::|||||||	5' ctGCCTTACTGCAGATGGCACCAGCc 3'
rno-miR-138-5p	Gosr1	150	-21.44	2	21	612	639	3' gccGGACUAAG-UGUU----GUGGUCGa 5'	||||: || || | |||||||	5' agcCCTGGGTCAACTACTGCCACCAGCa 3'
rno-miR-138-5p	Gosr1	147	-25.62	3	22	312	337	3' gcCGGACU-A--AGUGUUGUGGUCga 5'	||: || | |||||:||||||	5' taGCTGGACTCCTCACAGCACCAGgc 3'
rno-miR-138-5p	Gosr2	158	-18.86	2	22	516	538	3' gcCGGACUAAGUG-UUGUGGUCGa 5'	| || | ||| |||||||||	5' gtGACT-AACCACGAACACCAGCa 3'
rno-miR-138-5p	Gosr2	152	-22.61	2	21	354	373	3' gccGGACUAAGUGUUGUGGUCGa 5'	:|||:| || |||||||	5' actTCTGGT---CATCACCAGCt 3'
rno-miR-138-5p	Gpd1	142	-17.58	2	22	54	74	3' gcCGGACUAAGUGUUGUGGUCGa 5'	|| || | ||| ||||||:	5' aaGCGTG--TGACACCACCAGTc 3'
rno-miR-138-5p	Gpihbp1	144	-20.29	2	18	1255	1278	3' gccggaCUAAG-UGUUGUGGUCGa 5'	|:||| : ||||||||:	5' ggagaaGGTTCTGGAACACCAGTa 3'
rno-miR-138-5p	Gpihbp1	140	-14.29	2	9	834	856	3' gccggacuaaguguuGUGGUCGa 5'	|||||||	5' atcaagctagacctcCACCAGCa 3'
rno-miR-138-5p	Gpr107	157	-24.26	2	22	1025	1047	3' gcCGGACUAAGUGUUGUGGUCGa 5'	||:||: : :||||||||	5' gaGCTTGGACAGGGACACCAGCg 3'
rno-miR-138-5p	Gpr155	145	-19.59	2	21	652	672	3' gccGGACUAAGUGUUGUGGUCGa 5'	::|||| | ||||||||:	5' attTTTGAT--AAAACACCAGTt 3'
rno-miR-138-5p	Gpr172b	141	-20.3	3	20	749	773	3' gccgGAC-UAAGUGU-UGUGGUCga 5'	||| |||| | |||||||	5' gtcgCTGTCTTCAGACACACCAGaa 3'
rno-miR-138-5p	Gpr183	149	-20.72	2	14	110	132	3' gccggacuaaGUGUUGUGGUCGa 5'	||| |||||||	5' tacccactgcCACCTCACCAGCc 3'
rno-miR-138-5p	Gpr22	152	-20.81	2	13	740	762	3' gccggacuaagUGUUGUGGUCGa 5'	::|||||||||	5' agaaggcgacaGTAACACCAGCc 3'
rno-miR-138-5p	Gpr45	144	-23.19	2	20	384	408	3' gccgGACUAAGUG---UUGUGGUCGa 5'	||| ||||| :||:|||||	5' gccaCTG-TTCACTTTGACGCCAGCa 3'
rno-miR-138-5p	Gpr45	143	-24.02	2	22	1583	1604	3' gcCGGACUAAGUGUUGUGGUCGa 5'	|:| | ||| :||:|||||	5' agGTCATACTCA-GACGCCAGCt 3'
rno-miR-138-5p	Gpr6	142	-22.3	2	21	830	855	3' gccGGAC-UAAGUGUU--GUGGUCGa 5'	:||| | ||||| :||||||	5' aacTCTGAAGCCACAACTTACCAGCa 3'
rno-miR-138-5p	Gpr68	146	-25.56	2	21	349	376	3' gccGGACUA-AGUGU----UGUGGUCGa 5'	|||| | ||||| |:||||||	5' ttcCCTGTTGTCACAGATGATACCAGCc 3'
rno-miR-138-5p	Gpx3	155	-21.64	2	21	385	410	3' gccGGACUAAGUGUU---GUGGUCGa 5'	|| |: |||| | |||||||	5' catCCGGGCTCACTATGCCACCAGCc 3'
rno-miR-138-5p	Gpx6	143	-18.29	2	21	18	43	3' gccGGACUAAGU---GUUGUGGUCGa 5'	::|| | || | |||||||	5' gccTTTGCTCCACCCCTTCACCAGCc 3'
rno-miR-138-5p	Grap	149	-20.17	2	21	348	370	3' gccGGACU-AAGUGUUGUGGUCGa 5'	||||: |::| |||||||	5' cctCCTGGCCTTGC-CCACCAGCa 3'
rno-miR-138-5p	Grb10	149	-21	2	21	2218	2240	3' gccGGACU-AAGUGUUGUGGUCGa 5'	|| || ||:| |||||||	5' gacCCCGAGCTCGC-TCACCAGCc 3'
rno-miR-138-5p	Grem1	166	-23	2	19	164	186	3' gccggACUAAGUGUUGUGGUCGa 5'	|| ||| |||||||||	5' gtgggTGTTTCCAAACACCAGCg 3'
rno-miR-138-5p	Grem1	162	-24.41	2	20	2192	2216	3' gccgGACUAAGUGUU--GUGGUCGa 5'	||||||| :| |||||||	5' gtcgCTGATTCTGGACGCACCAGCg 3'
rno-miR-138-5p	Grem1	143	-22.38	2	21	2080	2103	3' gccGGA-CUAAGUGUUGUGGUCGa 5'	||| | |||| ||||:||	5' tgcCCTAAAAGCACATCACCGGCc 3'
rno-miR-138-5p	Gria3	143	-21.94	3	21	1434	1458	3' gccGGAC--UAAGUGUUGUGGUCga 5'	|||| :|| :|| ||||||	5' aaaCCTGCTGTTGGCATCACCAGac 3'
rno-miR-138-5p	Grina	143	-29.58	3	22	286	307	3' gcCGGACUAAGUGUUGUGGUCga 5'	|:|||: : |||||||||	5' ggGTCTGGGAT-CAACACCAGgt 3'
rno-miR-138-5p	Grip2	157	-18.99	2	19	1317	1340	3' gccggACUAAGUGUU-GUGGUCGa 5'	||| || :|: |||||||	5' agaagTGACTCCTAGCCACCAGCt 3'
rno-miR-138-5p	Grlf1	164	-21.75	2	21	113	135	3' gccGGACUAAGUGUUGUGGUCGa 5'	|:| | | :||:|||||||	5' agaCTTCAGTGGCAGCACCAGCc 3'
rno-miR-138-5p	Grlf1	156	-18.87	2	21	298	320	3' gccGGACUAAGUGUUGUGGUCGa 5'	|| | || | :|||||||	5' caaCCCGTTTGCCTGCACCAGCg 3'
rno-miR-138-5p	Grm1	145	-22.85	2	22	2973	2995	3' gcCGGACUAAGUGUUGUGGUCGa 5'	|::||: : :||||:||||	5' gaGTTTGGAATTTAACATCAGCt 3'
rno-miR-138-5p	Grm1	145	-22.85	2	22	2009	2031	3' gcCGGACUAAGUGUUGUGGUCGa 5'	|::||: : :||||:||||	5' gaGTTTGGAATTTAACATCAGCt 3'
rno-miR-138-5p	Grm2	168	-23.88	2	21	1641	1663	3' gccGGACUAAGUGUUGUGGUCGa 5'	|||| | | |||||||||	5' agtCCTGTGTGAGAACACCAGCc 3'
rno-miR-138-5p	Gsk3a	140	-20.86	2	9	123	145	3' gccggacuaaguguuGUGGUCGa 5'	|||||||	5' catctaggcctccctCACCAGCc 3'
rno-miR-138-5p	Gstt1	159	-17.38	2	22	7	28	3' gcCGGACUAAGUGUUGUGGUCGa 5'	||:| | || | :|||||||	5' aaGCTTCA-TCCCTGCACCAGCc 3'
rno-miR-138-5p	Gtf3c4	150	-20.42	2	15	134	156	3' gccggacuaAGUGUUGUGGUCGa 5'	|||: |||||||	5' cctaggagcTCATTTCACCAGCa 3'
rno-miR-138-5p	Gtlf3b	152	-21.27	2	22	2543	2568	3' gcCGGACUAAGUGUU---GUGGUCGa 5'	|:| |||| | :: |||||||	5' ggGTCAGATTAAGGGGGTCACCAGCc 3'
rno-miR-138-5p	Gtlf3b	141	-24	2	22	2235	2256	3' gcCGG-ACUAAGUGUUGUGGUCGa 5'	||| ||:| :| ||||:|||	5' agGCCATGGT--GCCACACTAGCc 3'
rno-miR-138-5p	Guf1	158	-23.93	2	21	1374	1395	3' gccGGACUAAGUGUUGUGGUCGa 5'	::|||| : :|:|||||||	5' acaTTTGATAT-TAGCACCAGCt 3'
rno-miR-138-5p	Gulp1	144	-15.58	2	17	1682	1704	3' gccggacUAAGUGUUGUGGUCGa 5'	|||:|| ||||||:	5' tatgaacATTTACTTCACCAGTg 3'
rno-miR-138-5p	Gyg1	153	-30.79	2	19	437	462	3' gccggACUAAGUGUU---GUGGUCGa 5'	|||||||:|| :||||||	5' cggagTGATTCATAAGCCTACCAGCt 3'
rno-miR-138-5p	Gypc	144	-19.62	2	17	1313	1335	3' gccggacUAAGUGUUGUGGUCGa 5'	|| |: |||||||	5' gtcaagtATGGCCGCCACCAGCc 3'
rno-miR-138-5p	Gypc	141	-21.12	2	15	641	664	3' gccggacuaAGUG-UUGUGGUCGa 5'	|||| |::||||||	5' cctttccccTCACTAGTACCAGCt 3'
rno-miR-138-5p	Gypc	140	-19.19	3	17	67	89	3' gccggacUAAGUGUUGUGGUCga 5'	||| ||:||||||	5' tgccaccATTATCAGCACCAGga 3'
rno-miR-138-5p	H3f3b	149	-16.41	2	20	764	782	3' gccgGACUAAGUGUUGUGGUCGa 5'	|| |||| ||||||||	5' caagCT-ATTC---ACACCAGCa 3'
rno-miR-138-5p	H6pd	140	-15.96	2	21	204	226	3' gccGGACUAAGUGUUGUGGUCGa 5'	|: |:| : | |||||||:	5' cctCTAGGTGTCCCACACCAGTa 3'
rno-miR-138-5p	Haao	144	-19.24	2	18	174	198	3' gccggaCUAAG--UGUUGUGGUCGa 5'	||||| | :|||||||:	5' agagggGATTCCTAGGACACCAGTa 3'
rno-miR-138-5p	Haghl	144	-23.07	2	13	725	747	3' gccggacuaagUGUUGUGGUCGa 5'	::::|||||||	5' tcacaggccagGTGGCACCAGCc 3'
rno-miR-138-5p	Haghl	140	-17.83	2	9	309	331	3' gccggacuaaguguuGUGGUCGa 5'	|||||||	5' atgaatgcccggaccCACCAGCc 3'
rno-miR-138-5p	Has3	142	-20.99	3	19	571	593	3' gccggACUAAGUGUUGUGGUCga 5'	||| || :|||||||	5' agggaTGAGCCAAGACACCAGga 3'
rno-miR-138-5p	Haus7	147	-20.05	2	12	720	742	3' gccggacuaaguGUUGUGGUCGa 5'	::||||||||	5' taaagcagggacTGACACCAGCa 3'
rno-miR-138-5p	Hbegf	145	-16.2	2	14	71	93	3' gccggacuaaGUGUUGUGGUCGa 5'	:|| |||||||	5' agagggaaaaTACTTCACCAGCa 3'
rno-miR-138-5p	Hbp1	143	-20.7	2	20	386	406	3' gccgGACUAAGUGUUGUGGUCGa 5'	||| ||:|: |||:||||	5' actgCTG-TTTAT-ACATCAGCt 3'
rno-miR-138-5p	Hcfc1	150	-21.28	2	16	292	315	3' gccggacuAAGU-GUUGUGGUCGa 5'	|||| | |||||||	5' ctttgcacTTCACCCTCACCAGCt 3'
rno-miR-138-5p	Hddc3	142	-18.53	2	21	658	683	3' gccGGACUAAGUG-UU--GUGGUCGa 5'	||||: |::| || |||:|||	5' cttCCTGGGTTGCTAAGTCACTAGCg 3'
rno-miR-138-5p	Hdgfrp3	154	-19.93	2	22	1309	1329	3' gcCGGACUAAGUGUUGUGGUCGa 5'	|:|| | | |||||||||	5' atGTCTAA--GAAAACACCAGCt 3'
rno-miR-138-5p	Heatr2	147	-18.17	2	22	70	91	3' gcCGGACUAAGUGUUGUGGUCGa 5'	|||| | |: |||||||	5' caGCCTCA-GGATCCCACCAGCc 3'
rno-miR-138-5p	Heatr3	141	-19.99	3	20	360	384	3' gccgGAC-UAAGUGU-UGUGGUCga 5'	||| |||| | |||||||	5' gctgCTGTCTTCAGACACACCAGaa 3'
rno-miR-138-5p	Heca	147	-18.86	2	20	2705	2727	3' gccgGACUAAGUGUUGUGGUCGa 5'	:|| |:|| |||||||:	5' cacaTTGTCTTACCACACCAGTg 3'
rno-miR-138-5p	Heyl	164	-23.52	2	22	1522	1545	3' gcCGG-ACUAAGUGUUGUGGUCGa 5'	||: ||:| ::|| |||||||	5' tcGCTGTGGTGTGCATCACCAGCc 3'
rno-miR-138-5p	Heyl	141	-17.01	3	22	1977	1999	3' gcCGGACUAAGUGUUGUGGUCga 5'	|::|| ||| : ||||||	5' atGTTTGTTTCCTTCCACCAGac 3'
rno-miR-138-5p	Heyl	140	-21.85	3	20	538	560	3' gccgGACU-AAGUGUUGUGGUCga 5'	|||: || || |||||||	5' cctaCTGGCTTGAC-ACACCAGgc 3'
rno-miR-138-5p	Hibch	154	-23.13	2	22	223	246	3' gcCGGACU--AAGUGUUGUGGUCGa 5'	|||||| ||:| |:||||||:	5' ttGCCTGAAGTTTA-AGCACCAGTg 3'
rno-miR-138-5p	Hif1a	144	-13	2	21	504	526	3' gccGGACUAAGUGUUGUGGUCGa 5'	::| || | ||:||||||	5' ataTTTTCTTAAAAATACCAGCa 3'
rno-miR-138-5p	Hif3a	153	-19.28	2	22	45	65	3' gcCGGACUAAGUGUUGUGGUCGa 5'	||| | || | ||||||||	5' caGCCACACTC-C-ACACCAGCa 3'
rno-miR-138-5p	Hira	153	-21.57	2	22	113	135	3' gcCGGACUAAGUGUUGUGGUCGa 5'	|: || | : | :|||||||	5' agGTGTGTTGTCCTGCACCAGCa 3'
rno-miR-138-5p	Hisppd2a	144	-15.02	2	22	55	78	3' gcCG-GACUAAGUGUUGUGGUCGa 5'	|| || | | : |||||||	5' caGCACTCAGCCCTTCCACCAGCa 3'
rno-miR-138-5p	Hist1h4b	154	-23.33	2	19	524	546	3' gccggACUAAGUGUUGUGGUCGa 5'	||:||: : |||||||	5' accggTGGTTTTTCCCACCAGCt 3'
rno-miR-138-5p	Hist2h2be	162	-22.35	2	21	1327	1353	3' gccGGAC--UAAGUG--UUGUGGUCGa 5'	:||| || ||| |||||||||	5' gatTCTGACATACACTGAACACCAGCc 3'
rno-miR-138-5p	Hist2h2be	150	-20.66	2	20	432	455	3' gccgGAC-UAAGUGUUGUGGUCGa 5'	||| :| | ::|||||||	5' gtagCTGTGTCCTGGGCACCAGCg 3'
rno-miR-138-5p	Hk1	143	-14.64	2	12	407	429	3' gccggacuaaguGUUGUGGUCGa 5'	:| |||||||	5' tgtgaagtgtgtTATCACCAGCa 3'
rno-miR-138-5p	Hmgcl	140	-19.88	2	21	184	206	3' gccGGACUAAGUGUUGUGGUCGa 5'	||||: | | |||:|||	5' ggcCCTGGGTGAGTCCACTAGCc 3'
rno-miR-138-5p	Hmha1	152	-28.92	3	22	259	284	3' gcCGGACUAA---GUGUUGUGGUCga 5'	|:|||| | ||||:||||||	5' gtGTCTGAGTGGGCACAGCACCAGga 3'
rno-miR-138-5p	Hmx2	144	-18.05	3	21	198	220	3' gccGGACUAAGUGUUGUGGUCga 5'	|| |||| : |||||||	5' tatCCGCATTCCTCACACCAGag 3'
rno-miR-138-5p	Hnrnpa3	156	-22.61	2	22	554	578	3' gcCGGAC--UAAGUGUUGUGGUCGa 5'	||:|| | ||| |||||||	5' taGCTTGGAACTCAGTCCACCAGCc 3'
rno-miR-138-5p	Hnrnpa3	156	-22.61	2	22	3166	3190	3' gcCGGAC--UAAGUGUUGUGGUCGa 5'	||:|| | ||| |||||||	5' taGCTTGGAACTCAGTCCACCAGCc 3'
rno-miR-138-5p	Hnrnph3	142	-21.56	2	15	14	36	3' gccggacuaAGUGUUGUGGUCGa 5'	|| :||||||:||	5' acgtacacgTCCTAACACCGGCt 3'
rno-miR-138-5p	Hoxb4	140	-21.2	2	21	561	584	3' gccGGACUAAGUGUUGU-GGUCGa 5'	||| |||| ::||| |||||	5' gtcCCTTATTCCTGACACCCAGCg 3'
rno-miR-138-5p	Hr	152	-23.28	2	22	370	393	3' gcCGG-ACUAAGUGUUGUGGUCGa 5'	||: || | || |||||||	5' tgGCTGTGCTACAGCTCACCAGCa 3'
rno-miR-138-5p	Hrasls	145	-20.66	2	22	1816	1838	3' gcCGGACUAAGUGUUGUGGUCGa 5'	| | || |:| | |:|||||	5' ctGGCAGAATTAGACCGCCAGCc 3'
rno-miR-138-5p	Hs1bp3	147	-15.1	2	21	1303	1326	3' gccGGACUAA-GUGUUGUGGUCGa 5'	:|| || | | |||||||	5' aacTCTACTTCCCCTTCACCAGCa 3'
rno-miR-138-5p	Hs1bp3	145	-19.27	2	21	763	783	3' gccGGACUAAGUGUUGUGGUCGa 5'	|||| | : : |||||||	5' tctCCTG--TGGAGCCACCAGCc 3'
rno-miR-138-5p	Hs1bp3	140	-22.59	2	21	1343	1366	3' gccGGACUAAGUGUUGUG-GUCGa 5'	|:||:| | |||||| ||||	5' tctCTTGGTGCCCAACACTCAGCc 3'
rno-miR-138-5p	Hs2st1	143	-18.15	2	18	1995	2016	3' gccggaCUAAGUGUUGUGGUCGa 5'	|| | | : |||||||	5' aggaaaGACTGA-GCCACCAGCc 3'
rno-miR-138-5p	Hs6st1	148	-27.36	2	22	1796	1820	3' gcCGGACU--AAGUGUUGUGGUCGa 5'	|||||| ||| : :||||||	5' ctGCCTGAGGCTCAGGCTACCAGCt 3'
rno-miR-138-5p	Hs6st1	143	-17.7	2	22	671	696	3' gcCGG--ACUAAG-UGUUGUGGUCGa 5'	||| || | | || |:||||||	5' gtGCCAATGTTCCTACCATACCAGCa 3'
rno-miR-138-5p	Hsf2bp	144	-21.8	3	22	1500	1523	3' gcCGGAC-UAAGUGUUGUGGUCga 5'	||| | ||| ||||||||	5' ctGCCCGTCCTCAGAACACCAGgt 3'
rno-miR-138-5p	Hspa1a	140	-19.84	3	22	299	322	3' gcCGGACUAAG-UGUUGUGGUCga 5'	|: || | | | ||||||||	5' agGTGTGTTACAAAAACACCAGga 3'
rno-miR-138-5p	Hspa1b	146	-21.25	2	21	1237	1255	3' gccGGACUAAGUGUUGUGGUCGa 5'	||||| || |||||||	5' accCCTGA---AC-CCACCAGCt 3'
rno-miR-138-5p	Hspa1b	141	-21.02	3	20	997	1021	3' gccgGAC-UAAGUGU-UGUGGUCga 5'	||| |||| | |||||||	5' gtagCTGTCTTCAGAGACACCAGaa 3'
rno-miR-138-5p	Hspa4	148	-21.56	2	22	381	407	3' gcCGGACUAAGU----GUUGUGGUCGa 5'	| |||| | : || |||||||	5' aaGGCTGAGTGGAGATCACCACCAGCa 3'
rno-miR-138-5p	Hspa4l	164	-28.32	2	22	554	579	3' gcCGGACUAAG---UGUUGUGGUCGa 5'	|::||| |: |:|||||||||	5' tgGTTTGAGTTGGAATAACACCAGCa 3'
rno-miR-138-5p	Hspa4l	161	-20.53	2	19	382	405	3' gccggACUAAGUGUU-GUGGUCGa 5'	||:||:| |: |||||||	5' taatgTGGTTTAGAGCCACCAGCa 3'
rno-miR-138-5p	Hspb1	144	-16.75	2	21	21	43	3' gccGGACUAAGUGUUGUGGUCGa 5'	|| :| |: |||||||	5' atcCCCAGTAGCCGTCACCAGCc 3'
rno-miR-138-5p	Htr5a	141	-17.97	2	21	218	238	3' gccGGACUAAGUGUUGUGGUCGa 5'	||| | ||| ::||||||	5' cttCCTCA--CACTGTACCAGCa 3'
rno-miR-138-5p	Htr5b	144	-16.4	2	21	771	793	3' gccGGACUAAGUGUUGUGGUCGa 5'	|| ||| :::: ||:||||	5' cctCCAGATATGTGCCATCAGCc 3'
rno-miR-138-5p	Icam1	167	-29.5	2	22	634	659	3' gcCGGAC--UA-AGUGUUGUGGUCGa 5'	||||| :| || ||:|||||||	5' caGCCTGGAGTCTCCCAGCACCAGCa 3'
rno-miR-138-5p	Icos	143	-23.86	2	22	285	311	3' gcCGGACUAAG--UGUU--GUGGUCGa 5'	||||| ||| :| | ||||:||	5' gcGCCTGCTTCTAGCTATGCACCGGCc 3'
rno-miR-138-5p	Id4	146	-25.74	2	11	17	39	3' gccggacuaagugUUGUGGUCGa 5'	|:|||||||	5' gtgcggccgcctgAGCACCAGCg 3'
rno-miR-138-5p	Ide	153	-20.59	2	21	1155	1175	3' gccGGACUAAGUGUUGUGGUCGa 5'	|||| || | |||||||	5' gctCCTGTTTGTC--CACCAGCt 3'
rno-miR-138-5p	Ifitm5	165	-25.13	2	20	42	63	3' gccgGACUAAGUGUUGUGGUCGa 5'	||| | | ||||||||||	5' tcagCTG-TGCCCAACACCAGCt 3'
rno-miR-138-5p	Ifnar1	147	-21.57	3	22	1306	1327	3' gcCGGACUAAGUGUUGUGGUCga 5'	| :|| |||| :|||||||	5' ctGGTTGCTTCA-GACACCAGgg 3'
rno-miR-138-5p	Igf2	152	-31.09	2	22	1543	1566	3' gcCGGACUAAGU-GUUGUGGUCGa 5'	||: || || |||||||:||	5' cgGCTAGAGCCATCAACACCGGCt 3'
rno-miR-138-5p	Igf2	144	-21.99	2	22	1524	1547	3' gcCGGACUAAGU-GUUGUGGUCGa 5'	|| || || :||||||:||	5' caGCGAGAGCCAGTAACACCGGCt 3'
rno-miR-138-5p	Igf2	140	-18.45	2	14	1505	1528	3' gccggacuaaGU-GUUGUGGUCGa 5'	|| |||:||||||	5' tgcatcaagcCATCAATACCAGCg 3'
rno-miR-138-5p	Igf2bp2	152	-21.05	2	14	1	20	3' gccggacuaaGUGU-UGUGGUCGa 5'	|||| :|||||||	5' ----ggctccCACAGGCACCAGCa 3'
rno-miR-138-5p	Igfbp2	154	-24.48	2	22	15	45	3' gcCGGACU-AA---GUG----UUGUGGUCGa 5'	|||||: || ||| |||||||||	5' gtGCCTGGCTTCCCCACCCCAAACACCAGCa 3'
rno-miR-138-5p	Igsf11	146	-22.34	2	19	548	570	3' gccggACUAAGUGUUGUGGUCGa 5'	||:|||| |||||| ||	5' caaaaTGGTTCAGAACACCTGCa 3'
rno-miR-138-5p	Igsf11	141	-18.09	2	21	490	510	3' gccGGACUAAGUGUUGUGGUCGa 5'	||| || |::::||||||	5' tttCCT--TTGATGGTACCAGCg 3'
rno-miR-138-5p	Ikbkb	148	-17.84	2	15	595	616	3' gccggacuaAGUGUUGUGGUCGa 5'	|| | ||||||||	5' agatgaaggTC-CTACACCAGCc 3'
rno-miR-138-5p	Il13ra1	140	-14.39	2	21	1419	1441	3' gccGGACUAAGUGUUGUGGUCGa 5'	:|| | || | |||:|||	5' cttTCTCCTACAGATCACTAGCc 3'
rno-miR-138-5p	Il17d	143	-20.22	3	21	227	252	3' gccGGACUAAGUGU---UGUGGUCga 5'	::|||| :||| |||||||	5' ttcTTTGATATACAAGCACACCAGat 3'
rno-miR-138-5p	Il1f5	159	-23.53	2	22	1320	1341	3' gcCGGACUAAGUGUUGUGGUCGa 5'	| ||| | || | |||||||	5' cgGACTG-TGCAAACCACCAGCa 3'
rno-miR-138-5p	Il6ra	153	-17.09	2	14	2049	2071	3' gccggacuaaGUGUUGUGGUCGa 5'	| :|||||||||	5' aacagtaccaCTTAACACCAGCa 3'
rno-miR-138-5p	Il6st	147	-17.12	2	20	4234	4256	3' gccgGACUAAGUGUUGUGGUCGa 5'	:| :|| |||||||||:	5' ttaaTTAGTTGTCAACACCAGTg 3'
rno-miR-138-5p	Il6st	146	-20.35	2	21	4298	4322	3' gccGGACUAAG-UGUU-GUGGUCGa 5'	|:| :| | :::| |||||||	5' attCTTAGTCCTGTGATCACCAGCt 3'
rno-miR-138-5p	Il6st	145	-21.03	2	22	1697	1719	3' gcCGGACUAAGUGUUGUGGUCGa 5'	|||| || :||| ||||||	5' ttGCCTTCTTGGCAAAACCAGCc 3'
rno-miR-138-5p	Il6st	143	-20.09	2	21	3082	3100	3' gccGGACUAAGUGUUGUGGUCGa 5'	||||: | :|||||||	5' cttCCTGGAT----GCACCAGCa 3'
rno-miR-138-5p	Il9r	140	-24.7	3	22	1158	1181	3' gcCGGA-CUAAGUGUUGUGGUCga 5'	|:|| || | : :|||||||	5' ggGTCTGGAATGGAGACACCAGga 3'
rno-miR-138-5p	Ilf3	145	-24.02	2	22	61	80	3' gcCGGACUAAGUGUUGUGGUCGa 5'	|:||| |||| ||||||:	5' gaGTCTG---CACATCACCAGTt 3'
rno-miR-138-5p	Imp4	143	-18.46	2	22	305	326	3' gcCGGACUAAGUGUUGUGGUCGa 5'	|:| | | : :: |||||||	5' ggGTCAG-TCTTTGTCACCAGCa 3'
rno-miR-138-5p	Impact	147	-21.13	2	22	96	123	3' gcCGGACUA--AGUGU---UGUGGUCGa 5'	||| | | ||::: ||||||||	5' caGCCAGTTCATCGTGGTTACACCAGCa 3'
rno-miR-138-5p	Ina	158	-21.93	2	21	1157	1183	3' gccGGACUA---AG-UGUUGUGGUCGa 5'	:|||:| || ||| |||||||	5' actTCTGGTCAATCAACACCACCAGCa 3'
rno-miR-138-5p	Ing5	147	-23.49	2	22	488	509	3' gcCGGACUAAGUGUUGUGGUCGa 5'	|| ||: |||| ||||||:	5' ggGCATGG-CCACACCACCAGTg 3'
rno-miR-138-5p	Inhbb	143	-19.64	2	17	329	348	3' gccggacUAAGUGUUGUGGUCGa 5'	|||| | |||||||	5' agccaccATTC-C--CACCAGCt 3'
rno-miR-138-5p	Inhbc	141	-25.89	2	22	18	40	3' gcCGGACUAAGUGUUGUGGUCGa 5'	|||||| :| |:|| ||||	5' caGCCTGAGGTAGAGCAGCAGCc 3'
rno-miR-138-5p	Ino80	142	-14.57	2	22	641	661	3' gcCGGACUAAGUGUUGUGGUCGa 5'	||:| | : | |||||||	5' gaGCTTTAGGTCC--CACCAGCa 3'
rno-miR-138-5p	Ino80c	141	-17.85	2	20	659	680	3' gccgGACUAAGUGUUGUGGUCGa 5'	|| || : :||||||||:	5' acagCT-ATCTCTAACACCAGTt 3'
rno-miR-138-5p	Ino80c	140	-14.13	2	17	1767	1789	3' gccggacUAAGUGUUGUGGUCGa 5'	:||| : |||||||:	5' ctaagaaGTTCCTCACACCAGTc 3'
rno-miR-138-5p	Inpp4a	147	-23.09	3	22	589	610	3' gcCGGACUAAGUGUUGUGGUCga 5'	||:||:|| :: |||||||	5' aaGCTTGGTTGGT-ACACCAGga 3'
rno-miR-138-5p	Ints10	147	-18.5	2	21	2	25	3' gccGGACUAAGUGUU-GUGGUCGa 5'	||| || ::: |||||||	5' cgaCCTCCCTCCTGGCCACCAGCa 3'
rno-miR-138-5p	Ints3	146	-25.77	2	15	336	358	3' gccggacuaAGUGUUGUGGUCGa 5'	|||| |||||||:	5' ggacggcggTCACTACACCAGTg 3'
rno-miR-138-5p	Invs	153	-20.74	2	21	1420	1440	3' gccGGACUAAGUGUUGUGGUCGa 5'	||| | ||| |||||||	5' tatCCTCCTCCAC--CACCAGCt 3'
rno-miR-138-5p	Ipmk	153	-20.51	2	18	489	511	3' gccggaCUAAGUGUUGUGGUCGa 5'	|:| |:| |||||||	5' taagtgGGTGCGCTCCACCAGCa 3'
rno-miR-138-5p	Ipmk	145	-13.03	2	22	737	759	3' gcCGGACUAAGUGUUGUGGUCGa 5'	|| | || | :| ||||||:	5' aaGCATAATACTTATCACCAGTc 3'
rno-miR-138-5p	Ipmk	145	-26.13	2	10	1731	1753	3' gccggacuaaguguUGUGGUCGa 5'	||||||||	5' ctcgagctctgggcACACCAGCt 3'
rno-miR-138-5p	Iqsec3	142	-18.68	2	19	2135	2157	3' gccggACUAAGUGUUGUGGUCGa 5'	||| : ||:||:||||	5' tcagaTGAGCTCCAGCATCAGCa 3'
rno-miR-138-5p	Irak3	141	-15.63	2	15	649	672	3' gccggacuaAGU-GUUGUGGUCGa 5'	||: :: |||||||	5' aactcaccaTCGTTGCCACCAGCa 3'
rno-miR-138-5p	Irf6	142	-16.6	2	21	1037	1058	3' gccGGACUAAGUGUUGUGGUCGa 5'	|:|| || | | |||:|||	5' aaaCTTGCTT-AGATCACTAGCt 3'
rno-miR-138-5p	Irgc1	150	-20.15	2	21	32	53	3' gccGGACUAAGUGUUGUGGUCGa 5'	:| | |||| |||||||	5' accTCCGCCTCAC-CCACCAGCc 3'
rno-miR-138-5p	Itga10	145	-21.85	2	22	179	201	3' gcCGGACUAAGUGUUGUGGUCGa 5'	||: | || |||||:|||	5' ggGCTGGCACCAAAACACTAGCa 3'
rno-miR-138-5p	Itga5	155	-26.58	2	21	837	860	3' gccGGA-CUAAGUGUUGUGGUCGa 5'	||| |:||| |||||||	5' cgaCCTGGGTTCTGCCCACCAGCt 3'
rno-miR-138-5p	Itga7	144	-22.31	2	22	372	395	3' gcCGGACU-AAGUGUUGUGGUCGa 5'	|||| | | ::| ::||||||	5' tgGCCTTAGTGTGCTGTACCAGCc 3'
rno-miR-138-5p	Itga9	154	-17.43	2	21	24	48	3' gccGGA-C-UAAGUGUUGUGGUCGa 5'	||| | :| | || |||||||	5' gtcCCTCGTGTCCCCATCACCAGCc 3'
rno-miR-138-5p	Itgal	149	-18.89	2	20	638	659	3' gccgGACUAAGUGUUGUGGUCGa 5'	||| | | ||||||||	5' cacaCTGCACCTC-ACACCAGCc 3'
rno-miR-138-5p	Itgal	140	-13.84	2	21	54	76	3' gccGGACUAAGUGUUGUGGUCGa 5'	:| | | ||:: |||:|||	5' gctTCAGCTCCATGTCACTAGCc 3'
rno-miR-138-5p	Itgbl1	141	-20.46	3	22	59	81	3' gcCGGACUAAGUGUUGUGGUCga 5'	|| || | ||||:|||:||	5' aaGCATGTTACACAGCACTAGga 3'
rno-miR-138-5p	Itk	140	-14.42	2	9	64	86	3' gccggacuaaguguuGUGGUCGa 5'	|||||||	5' agcattaaaagctgcCACCAGCc 3'
rno-miR-138-5p	Itpk1	144	-25.1	3	22	246	269	3' gcCGGAC-UAAGUGUUGUGGUCga 5'	||:|| :||| ||||||:||	5' acGCTTGTGTTCTCAACACTAGgt 3'
rno-miR-138-5p	Itpkb	140	-12.78	2	9	1	11	3' gccggacuaaguguuGUGGUCGa 5'	|||||||	5' ------------ggcCACCAGCa 3'
rno-miR-138-5p	Itpkc	148	-19.79	2	21	585	607	3' gccGGACUAAGUGUUGUGGUCGa 5'	||| |:: :|||||||	5' cttCCTTCCTTGGTGCACCAGCt 3'
rno-miR-138-5p	Itpr2	142	-19.89	2	21	1153	1179	3' gccGGACUA--AGUGUU--GUGGUCGa 5'	:|||:| | | :: |||||||	5' ccaTCTGGTGGTGAGGGGCCACCAGCc 3'
rno-miR-138-5p	Jazf1	142	-18.06	2	19	748	770	3' gccggACUAAGUGUUGUGGUCGa 5'	||: || :|||||||:	5' acttgTGGACCAAGACACCAGTg 3'
rno-miR-138-5p	Jazf1	140	-16.1	2	9	17	39	3' gccggacuaaguguuGUGGUCGa 5'	|||||||	5' gtgccaagaaatcctCACCAGCa 3'
rno-miR-138-5p	Jmjd1c	160	-22.55	2	22	362	385	3' gcCGGACUAAGUG-UUGUGGUCGa 5'	| || : ||| |||||||||	5' gaGACTAGGACACAAACACCAGCt 3'
rno-miR-138-5p	Jmjd1c	148	-20.29	2	20	97	117	3' gccgGACUAAGUGUUGUGGUCGa 5'	|||| ||| |||||||:	5' gctaCTGA--CACCACACCAGTa 3'
rno-miR-138-5p	Jmjd8	153	-23.11	2	14	12	34	3' gccggacuaaGUGUUGUGGUCGa 5'	||| :|||||||	5' ctggcaagccCACTGCACCAGCa 3'
rno-miR-138-5p	Jmjd8	143	-23.96	2	22	549	570	3' gcCGGACUAAGUGUUGUGGUCGa 5'	|| |:||| | :||:||||	5' atGCAGGGTTC-CCGCATCAGCt 3'
rno-miR-138-5p	Jmjd8	140	-18.42	2	9	85	107	3' gccggacuaaguguuGUGGUCGa 5'	|||||||	5' gcagcaacccaccctCACCAGCt 3'
rno-miR-138-5p	Josd1	148	-14.91	2	22	1257	1275	3' gcCGGACUAAGUGUUGUGGUCGa 5'	|| || || ||||||||	5' gtGCATGTTT----ACACCAGCa 3'
rno-miR-138-5p	Josd1	141	-16.82	3	22	1373	1395	3' gcCGGACUAAGUGUUGUGGUCga 5'	|| |||: | |||||||	5' ctGCACCATTTTCTACACCAGat 3'
rno-miR-138-5p	Jsrp1	149	-20.62	2	14	33	55	3' gccggacuaaGUGUUGUGGUCGa 5'	:::|:|||||||	5' cccctctcccTGTAGCACCAGCa 3'
rno-miR-138-5p	Kcnc1	146	-15.09	2	20	310	333	3' gccgGACUAAG-UGUUGUGGUCGa 5'	|| | | || |||||||	5' ccagCTAAACCAACCCCACCAGCc 3'
rno-miR-138-5p	Kcnd1	146	-21.28	2	21	1594	1615	3' gccGGACUAAGUGUUGUGGUCGa 5'	:|| |||| :|:||||||	5' tgtTCT-ATTCTGGATACCAGCt 3'
rno-miR-138-5p	Kcne1	153	-24.28	2	19	94	117	3' gccggACU-AAGUGUUGUGGUCGa 5'	||| || |:||||||||:	5' aggggTGAGTTAATAACACCAGTt 3'
rno-miR-138-5p	Kcnj6	153	-20.76	2	14	12663	12685	3' gccggacuaaGUGUUGUGGUCGa 5'	:||| |||||||	5' ctgcatccagTACACCACCAGCt 3'
rno-miR-138-5p	Kcnj6	149	-30.58	2	22	2369	2388	3' gcCGGACUAAGUGUUGUGGUCGa 5'	|||||: :|||||||||:	5' agGCCTGG---GCAACACCAGTg 3'
rno-miR-138-5p	Kcnj6	144	-20.81	2	22	3694	3717	3' gcCGGA-CUAAGUGUUGUGGUCGa 5'	|||| || | |: :||||||	5' aaGCCTAGACACTCGCTACCAGCa 3'
rno-miR-138-5p	Kcnj6	142	-16.91	2	21	13199	13220	3' gccGGACUAAGUGUUGUGGUCGa 5'	| ||| : | |||||||	5' tatCATGAGGT-CCTCACCAGCa 3'
rno-miR-138-5p	Kcnk15	150	-21.05	2	21	604	630	3' gccGGACUAA--GUG--UUGUGGUCGa 5'	:|||: | ||| | |||||||	5' cttTCTGGGTCCCACCGATCACCAGCa 3'
rno-miR-138-5p	Kcnk3	140	-19.15	2	9	168	190	3' gccggacuaaguguuGUGGUCGa 5'	|||||||	5' aactgtgcgggctttCACCAGCc 3'
rno-miR-138-5p	Kcnk5	140	-22.65	2	22	1434	1457	3' gcCGGAC-UAAGUGUUGUGGUCGa 5'	| :|| || :| |||||:||	5' gcGGTTGCATAGGCCACACCGGCc 3'
rno-miR-138-5p	Kcnma1	159	-24.95	2	21	678	703	3' gccGGACUAAGUGU---UGUGGUCGa 5'	::|||| ::|| ||||||||	5' tgtTTTGATCTGCATTGACACCAGCt 3'
rno-miR-138-5p	Kcns1	147	-20.55	2	16	150	172	3' gccggacuAAGUGUUGUGGUCGa 5'	| ||: |||||||	5' caccgcccTCCATTCCACCAGCc 3'
rno-miR-138-5p	Kcnv2	144	-21.19	2	22	427	452	3' gcCGGACUAAGUGUU---GUGGUCGa 5'	||| || || ||: :||||||	5' caGCCAGAATCCCAGATCTACCAGCt 3'
rno-miR-138-5p	Kctd18	145	-17.52	2	18	412	434	3' gccggaCUAAGUGUUGUGGUCGa 5'	|| | | |||||||	5' aagaggGAGTGTGACCACCAGCt 3'
rno-miR-138-5p	Kctd2	140	-23.3	2	22	396	419	3' gcCGG-ACUAAGUGUUGUGGUCGa 5'	||| |||| ||| || ||||	5' gtGCCATGATGGACATCAGCAGCt 3'
rno-miR-138-5p	Kdelc2	146	-20.29	2	11	1804	1826	3' gccggacuaagugUUGUGGUCGa 5'	|:|||||||	5' agctgaggaagggAGCACCAGCa 3'
rno-miR-138-5p	Kdelc2	144	-20.49	3	22	182	208	3' gcCGGACUA----AGUGUUGUGGUCga 5'	||: ||| ||| ||||||||	5' caGCTGGATTTTATCAAAACACCAGaa 3'
rno-miR-138-5p	Kdelr1	142	-20.63	2	15	1	17	3' gccggacuaAGUGUUGUGGUCGa 5'	| :| |||||||	5' ------cccTGGCCTCACCAGCc 3'
rno-miR-138-5p	Kdelr2	152	-22.38	2	21	927	949	3' gccGGACUAAGUGUUGUGGUCGa 5'	::| ||| :||:||||||:	5' atcTTTAATTGGCAGCACCAGTt 3'
rno-miR-138-5p	Kdm2a	153	-22.63	2	19	2670	2694	3' gccggACUAAGUGUU--GUGGUCGa 5'	||| || :|: |||||||	5' gggaaTGAGTCTTAGGCCACCAGCt 3'
rno-miR-138-5p	Kdm4a	144	-18.5	2	14	302	325	3' gccggacuaaGU-GUUGUGGUCGa 5'	|| | :|||||||	5' tcctaccaccCACCTGCACCAGCa 3'
rno-miR-138-5p	Kdm6b	140	-20.29	2	9	24	46	3' gccggacuaaguguuGUGGUCGa 5'	|||||||	5' ccacgcgggcggggcCACCAGCa 3'
rno-miR-138-5p	Khdrbs1	144	-15.57	2	17	984	1006	3' gccggacUAAGUGUUGUGGUCGa 5'	|| : ||||||:|||	5' gttaagtATGTTCAACACTAGCa 3'
rno-miR-138-5p	Kidins220	151	-28.8	2	22	118	142	3' gcCGGAC-UAAGUGUU-GUGGUCGa 5'	||||| | ||||: ||||||:	5' aaGCCTGAAAGCACAGTCACCAGTc 3'
rno-miR-138-5p	Kif11	165	-28.62	2	22	606	628	3' gcCGGACUAAGUGUUGUGGUCGa 5'	|:|||| | :::|||||||	5' agGTCTGACACCTGGCACCAGCc 3'
rno-miR-138-5p	Kif2c	143	-18.2	2	21	14	38	3' gccGGACUAA--GUGUUGUGGUCGa 5'	:||| || :|: ||||:|||	5' agaTCTGTTTGGTATCACACTAGCc 3'
rno-miR-138-5p	Kif3b	163	-22.75	2	22	319	340	3' gcCGGACUAAGUGUUGUGGUCGa 5'	|||| | :|| ||||||||	5' taGCCTCCTCTAC-ACACCAGCc 3'
rno-miR-138-5p	Kif3b	145	-17.82	2	22	805	825	3' gcCGGACUAAGUGUUGUGGUCGa 5'	|| ||| || |||||||	5' gcGCGTGA-AGAC-CCACCAGCa 3'
rno-miR-138-5p	Klf10	142	-17	2	19	826	848	3' gccggACUAAGUGUUGUGGUCGa 5'	||: |:|:: ||:||||	5' aaagaTGGCTTATGTCATCAGCa 3'
rno-miR-138-5p	Klf11	164	-19.19	2	21	253	275	3' gccGGACUAAGUGUUGUGGUCGa 5'	::|||| :| | |||||||	5' aaaTTTGATCTAAATCACCAGCa 3'
rno-miR-138-5p	Klf14	143	-22.82	3	16	283	305	3' gccggacuAAGUGUUGUGGUCga 5'	| ||||:||||||	5' ttcttcccTCCACAGCACCAGag 3'
rno-miR-138-5p	Klf7	141	-17.57	2	20	1490	1511	3' gccgGACUAAGUGUUGUGGUCGa 5'	||| | | | |:||||||	5' gttgCTGCTCCTC-ATACCAGCt 3'
rno-miR-138-5p	Klhdc5	153	-19.49	2	22	1445	1467	3' gcCGGACUAAGUGUUGUGGUCGa 5'	||: | || ||||||||	5' caGCTAAAGGAACCACACCAGCt 3'
rno-miR-138-5p	Klhdc8a	152	-24.41	2	21	714	736	3' gccGGACUAAGUGUUGUGGUCGa 5'	||||:|| |:|||| ||||	5' cacCCTGGTTAATAACAGCAGCa 3'
rno-miR-138-5p	Klhdc8a	140	-21.14	2	21	1239	1261	3' gccGGACUAAGUGUUGUGGUCGa 5'	||||| |: || | |||||	5' ggaCCTGAGTTCCATCCCCAGCa 3'
rno-miR-138-5p	Klhl12	156	-18.29	2	19	1	20	3' gccggACUAAGUGUUGUGGUCGa 5'	| |||:: :||||||||	5' --ctgTTATTTG-GACACCAGCt 3'
rno-miR-138-5p	Klhl12	142	-21.44	2	18	82	104	3' gccggaCUAAGUGU-UGUGGUCGa 5'	|||| ||| :||||||:	5' cagggcGATT-ACAGGCACCAGTg 3'
rno-miR-138-5p	Klhl13	141	-23.66	2	20	584	609	3' gccgGAC--UAAGU-GUUGUGGUCGa 5'	||| ||||| ||||||:||:	5' ataaCTGAAATTCACCAACACTAGTt 3'
rno-miR-138-5p	Klhl21	142	-19.98	2	11	141	163	3' gccggacuaagugUUGUGGUCGa 5'	| |||||||	5' aaaggcggtggtgACCACCAGCa 3'
rno-miR-138-5p	Klhl22	157	-24.74	3	22	55	77	3' gcCGGACUAAGUGUUGUGGUCga 5'	||:||: |:| ||||||||	5' gaGCTTGGGTTAGAACACCAGgc 3'
rno-miR-138-5p	Klhl22	146	-23.24	2	21	104	121	3' gccGGACUAAGUGUUGUGGUCGa 5'	||||:|| |||||||	5' catCCTGGTT-----CACCAGCt 3'
rno-miR-138-5p	Klhl22	141	-28.68	2	22	398	420	3' gcCGGACUAAGUGUUGUGGUCGa 5'	|:|||:| :||:| |||||	5' ctGTCTGGTGAGCAGCTCCAGCt 3'
rno-miR-138-5p	Klhl23	143	-17.07	2	21	7	30	3' gccGGACUAAGUGU-UGUGGUCGa 5'	||| | ||:: |||||:||	5' cttCCTCACCCATGTACACCGGCa 3'
rno-miR-138-5p	Klhl24	146	-20.13	3	21	112	133	3' gccGGACUAAGUGUUGUGGUCga 5'	:|||| || ||||||||	5' cttTCTGACCCA-AACACCAGac 3'
rno-miR-138-5p	Klhl25	164	-30.03	2	22	46	70	3' gcCGGACU--AAGUGUUGUGGUCGa 5'	||| || | |||:|||||||	5' ggGCCAGAAGCTGACAGCACCAGCt 3'
rno-miR-138-5p	Klhl25	142	-21.82	2	22	187	207	3' gcCGGACUAAGUGUUGUGGUCGa 5'	|| ||: ::: |||||||	5' agGCGTGGGCTGT--CACCAGCa 3'
rno-miR-138-5p	Klhl29	152	-25.12	2	21	1035	1057	3' gccGGACUAAGUGUUGUGGUCGa 5'	:|||: || ::|||||||:	5' ggtTCTGGCTCCTGACACCAGTc 3'
rno-miR-138-5p	Klk14	156	-23.53	2	21	11	30	3' gccGGACUAAGUGUUGUGGUCGa 5'	:||||| || |||||||	5' ccaTCTGAT---CATCACCAGCt 3'
rno-miR-138-5p	Klkb1	143	-19.89	2	12	21	43	3' gccggacuaaguGUUGUGGUCGa 5'	:::|||||||	5' gaagagcccagcTGGCACCAGCt 3'
rno-miR-138-5p	Kpna6	143	-23.34	2	13	20	43	3' gccggacuaagUGU-UGUGGUCGa 5'	:|| :|||||||	5' ggcagggcacgGCATGCACCAGCa 3'
rno-miR-138-5p	Kpna6	140	-17.72	2	9	72	94	3' gccggacuaaguguuGUGGUCGa 5'	|||||||	5' caggagaacaggcccCACCAGCc 3'
rno-miR-138-5p	Kpnb1	149	-21.34	2	14	202	224	3' gccggacuaaGUGUUGUGGUCGa 5'	|||||||:||||	5' ttgtagaaaaCACAACATCAGCc 3'
rno-miR-138-5p	Krt1	144	-16.84	2	13	60	82	3' gccggacuaagUGUUGUGGUCGa 5'	|: :|||||||	5' aaccaaaaccaATTGCACCAGCc 3'
rno-miR-138-5p	Krt19	156	-21.42	2	22	49	73	3' gcCGGACUAAGU--GUUGUGGUCGa 5'	|| |||| | : ||||||||	5' ggGCATGATAAAGTTCACACCAGCc 3'
rno-miR-138-5p	Krtap31-1	140	-20.23	3	21	285	307	3' gccGGACUAAGUGUUGUGGUCga 5'	:||||||:::| |||:||	5' actTCTGATTTGTATCACTAGaa 3'
rno-miR-138-5p	Kti12	158	-25.51	2	20	156	180	3' gccgGACUAAGUG--UUGUGGUCGa 5'	|||| ||: |:|||||||	5' taagCTGAGGCATTGAGCACCAGCt 3'
rno-miR-138-5p	Ky	164	-29.26	2	22	2836	2862	3' gcCGGACUAAGUGUU----GUGGUCGa 5'	||:|| |||| || |||||||	5' cgGCTTGCTTCAAAAGTGCCACCAGCt 3'
rno-miR-138-5p	Ky	141	-21.97	3	20	2065	2086	3' gccgGACUAAGUGUUGUGGUCga 5'	||| | | ||:||||||	5' ggagCTG-TCCTCAGCACCAGaa 3'
rno-miR-138-5p	L2hgdh	148	-19.03	2	17	25	47	3' gccggacUAAGUGUUGUGGUCGa 5'	|||| | |||:||||	5' accttacATTCTCCACATCAGCa 3'
rno-miR-138-5p	L3mbtl2	141	-17.32	2	22	962	984	3' gcCGGACUAAGUGUUGUGGUCGa 5'	|: | || : ||||||||:	5' caGTATCATCTTGAACACCAGTt 3'
rno-miR-138-5p	Lamc1	154	-21.99	2	22	2096	2116	3' gcCGGACUAAGUGUUGUGGUCGa 5'	| |||| || : |||||||	5' atGGCTGA--CAGGCCACCAGCa 3'
rno-miR-138-5p	Lamc3	159	-24.77	2	22	1580	1604	3' gcCGG-ACUAA-GUGUUGUGGUCGa 5'	||| |:|| || ::|||||||	5' caGCCAAGGTTACAGGGCACCAGCc 3'
rno-miR-138-5p	Lamc3	145	-30.28	3	22	782	804	3' gcCGGACUAAGUGUUGUGGUCga 5'	|:|||: |||::|||||:|	5' ggGTCTGGGTCATGACACCGGga 3'
rno-miR-138-5p	Lamc3	140	-20.24	2	21	176	196	3' gccGGACUAAGUGUUGUGGUCGa 5'	||||| || ::||:||||	5' ctcCCTGA-ACA-GGCATCAGCa 3'
[truncated: 31,996 more rows]

## Sheet: miRNA-gene
miRNA	Gene_symbol
rno-miR-138-1-3p	Aak1
rno-miR-138-1-3p	Aard
rno-miR-138-1-3p	Abcd2
rno-miR-138-1-3p	Abi2
rno-miR-138-1-3p	Acads
rno-miR-138-1-3p	Accs
rno-miR-138-1-3p	Acer1
rno-miR-138-1-3p	Acer2
rno-miR-138-1-3p	Acot7
rno-miR-138-1-3p	Acvrl1
rno-miR-138-1-3p	Adam10
rno-miR-138-1-3p	Adamdec1
rno-miR-138-1-3p	Adat1
rno-miR-138-1-3p	Add2
rno-miR-138-1-3p	Aen
rno-miR-138-1-3p	Aff4
rno-miR-138-1-3p	Agl
rno-miR-138-1-3p	Agpat5
rno-miR-138-1-3p	Agr3
rno-miR-138-1-3p	Ahcyl2
rno-miR-138-1-3p	aicda
rno-miR-138-1-3p	Akna
rno-miR-138-1-3p	Aktip
rno-miR-138-1-3p	Alas1
rno-miR-138-1-3p	Aldh3b1
rno-miR-138-1-3p	Aldh6a1
rno-miR-138-1-3p	Alkbh5
rno-miR-138-1-3p	Amz2
rno-miR-138-1-3p	Anapc11
rno-miR-138-1-3p	Angpt2
rno-miR-138-1-3p	Ank1
rno-miR-138-1-3p	Ank2
rno-miR-138-1-3p	Ankib1
rno-miR-138-1-3p	Ankrd16
rno-miR-138-1-3p	Ankrd5
rno-miR-138-1-3p	Ankrd57
rno-miR-138-1-3p	Ankrd6
rno-miR-138-1-3p	Ano10
rno-miR-138-1-3p	Anxa2
rno-miR-138-1-3p	Aoc3
rno-miR-138-1-3p	Aox4
rno-miR-138-1-3p	Ap3m1
rno-miR-138-1-3p	Apc2
rno-miR-138-1-3p	Api5
rno-miR-138-1-3p	Ard1b
rno-miR-138-1-3p	Arf3
rno-miR-138-1-3p	Arfgap2
rno-miR-138-1-3p	Arhgef15
rno-miR-138-1-3p	Arhgef2
rno-miR-138-1-3p	Arhgef7
rno-miR-138-1-3p	Arl5b
rno-miR-138-1-3p	Armc2
rno-miR-138-1-3p	Arnt2
rno-miR-138-1-3p	Arpp-21
rno-miR-138-1-3p	Asam
rno-miR-138-1-3p	Asb6
rno-miR-138-1-3p	Astn1
rno-miR-138-1-3p	Ate1
rno-miR-138-1-3p	Atg4b
rno-miR-138-1-3p	Atl2
rno-miR-138-1-3p	Atmin
rno-miR-138-1-3p	Atoh8
rno-miR-138-1-3p	Atp11a
rno-miR-138-1-3p	Atp2a2
rno-miR-138-1-3p	Atp5s
rno-miR-138-1-3p	Atp6v0c
rno-miR-138-1-3p	Atp6v1b1
rno-miR-138-1-3p	Atp6v1g1
rno-miR-138-1-3p	Atrn
rno-miR-138-1-3p	Aurka
rno-miR-138-1-3p	B3galt5
rno-miR-138-1-3p	B3gnt2
rno-miR-138-1-3p	Bahd1
rno-miR-138-1-3p	Bbs1
rno-miR-138-1-3p	Bcl11a
rno-miR-138-1-3p	Bcl2l10
rno-miR-138-1-3p	Bclaf1
rno-miR-138-1-3p	Bend5
rno-miR-138-1-3p	Bhlhe40
rno-miR-138-1-3p	Birc6
rno-miR-138-1-3p	Bmx
rno-miR-138-1-3p	Bpgm
rno-miR-138-1-3p	Brms1l
rno-miR-138-1-3p	Btg1
rno-miR-138-1-3p	C20orf165
rno-miR-138-1-3p	Cacna1b
rno-miR-138-1-3p	Cacna1s
rno-miR-138-1-3p	Capn6
rno-miR-138-1-3p	Car7
rno-miR-138-1-3p	Carhsp1
rno-miR-138-1-3p	Carkd
rno-miR-138-1-3p	Casc5
rno-miR-138-1-3p	Catsper3
rno-miR-138-1-3p	Cbx1
rno-miR-138-1-3p	Ccdc106
rno-miR-138-1-3p	Ccdc117
rno-miR-138-1-3p	Ccdc21
rno-miR-138-1-3p	Ccdc8
rno-miR-138-1-3p	Ccdc96
rno-miR-138-1-3p	Ccdc97
rno-miR-138-1-3p	Ccl3
rno-miR-138-1-3p	Ccl9
rno-miR-138-1-3p	Ccnt2
rno-miR-138-1-3p	Ccpg1
rno-miR-138-1-3p	Ccr9
rno-miR-138-1-3p	Cd164
rno-miR-138-1-3p	Cd38
rno-miR-138-1-3p	Cdc42se2
rno-miR-138-1-3p	Cdipt
rno-miR-138-1-3p	Cebpg
rno-miR-138-1-3p	Cenpa
rno-miR-138-1-3p	Chkb
rno-miR-138-1-3p	Chrm4
rno-miR-138-1-3p	Cisd2
rno-miR-138-1-3p	Cish
rno-miR-138-1-3p	Clca2
rno-miR-138-1-3p	Cldn12
rno-miR-138-1-3p	Cldn5
rno-miR-138-1-3p	Clip2
rno-miR-138-1-3p	Clp1
rno-miR-138-1-3p	Clta
rno-miR-138-1-3p	Cndp2
rno-miR-138-1-3p	Cnih
rno-miR-138-1-3p	Cnih4
rno-miR-138-1-3p	Cnksr2
rno-miR-138-1-3p	Cnot6l
rno-miR-138-1-3p	Cobl
rno-miR-138-1-3p	Commd2
rno-miR-138-1-3p	Cox16
rno-miR-138-1-3p	Cpne5
rno-miR-138-1-3p	Cpne8
rno-miR-138-1-3p	Cpsf7
rno-miR-138-1-3p	Cpt1a
rno-miR-138-1-3p	Crebl2
rno-miR-138-1-3p	Crispld1
rno-miR-138-1-3p	Crtc3
rno-miR-138-1-3p	Csde1
rno-miR-138-1-3p	Csrp2bp
rno-miR-138-1-3p	Ctnna2
rno-miR-138-1-3p	Ctnnbip1
rno-miR-138-1-3p	Cttn
rno-miR-138-1-3p	Cxcl12
rno-miR-138-1-3p	Cxcl16
rno-miR-138-1-3p	Cyp11b1
rno-miR-138-1-3p	Cyp11b2
rno-miR-138-1-3p	Cyp1a1
rno-miR-138-1-3p	Cyp4a1
rno-miR-138-1-3p	Cyp4a10
rno-miR-138-1-3p	Cys1
rno-miR-138-1-3p	Cytip
rno-miR-138-1-3p	Daam1
rno-miR-138-1-3p	Dcaf5
rno-miR-138-1-3p	Dcdc2
rno-miR-138-1-3p	Ddn
rno-miR-138-1-3p	Ddx19b
rno-miR-138-1-3p	Ddx54
rno-miR-138-1-3p	Depdc5
rno-miR-138-1-3p	Dgat2l6
rno-miR-138-1-3p	Dgkb
rno-miR-138-1-3p	Disp2
rno-miR-138-1-3p	Dlx4
rno-miR-138-1-3p	Dmtf1
rno-miR-138-1-3p	Dmwd
rno-miR-138-1-3p	Dnajb1
rno-miR-138-1-3p	Dnajb12
rno-miR-138-1-3p	Dnajc27
rno-miR-138-1-3p	Dnajc8
rno-miR-138-1-3p	Dnali1
rno-miR-138-1-3p	Dnm3
rno-miR-138-1-3p	Dnmt3b
rno-miR-138-1-3p	Dock6
rno-miR-138-1-3p	Dock8
rno-miR-138-1-3p	Dohh
rno-miR-138-1-3p	Dpp8
rno-miR-138-1-3p	Dpyd
rno-miR-138-1-3p	Dstyk
rno-miR-138-1-3p	Duox1
rno-miR-138-1-3p	Ecop
rno-miR-138-1-3p	Ednra
rno-miR-138-1-3p	Ehd1
rno-miR-138-1-3p	Ehhadh
rno-miR-138-1-3p	Eif1ad
rno-miR-138-1-3p	Eif1ay
rno-miR-138-1-3p	Eif5a2
rno-miR-138-1-3p	Elk4
rno-miR-138-1-3p	Elmod2
rno-miR-138-1-3p	Ep300
rno-miR-138-1-3p	Epm2aip1
rno-miR-138-1-3p	Eps8
rno-miR-138-1-3p	Etv5
rno-miR-138-1-3p	Evc
rno-miR-138-1-3p	Exoc6b
rno-miR-138-1-3p	Ezh1
rno-miR-138-1-3p	Faah
rno-miR-138-1-3p	Fam102b
rno-miR-138-1-3p	Fam110c
rno-miR-138-1-3p	Fam111a
rno-miR-138-1-3p	Fam116b
rno-miR-138-1-3p	FAM120C
rno-miR-138-1-3p	Fam133b
rno-miR-138-1-3p	Fam13b1
rno-miR-138-1-3p	Fam163a
rno-miR-138-1-3p	Fam169a
rno-miR-138-1-3p	Fam171b
rno-miR-138-1-3p	Fam19a5
rno-miR-138-1-3p	Fam20b
rno-miR-138-1-3p	Fam40a
rno-miR-138-1-3p	Fam53b
rno-miR-138-1-3p	Fam81a
rno-miR-138-1-3p	Fam98a
rno-miR-138-1-3p	Fbxl19
rno-miR-138-1-3p	Fbxl22
rno-miR-138-1-3p	Fbxo22
rno-miR-138-1-3p	Fbxo33
rno-miR-138-1-3p	Fbxw5
rno-miR-138-1-3p	Fbxw8
rno-miR-138-1-3p	Fermt2
rno-miR-138-1-3p	Fhl1
rno-miR-138-1-3p	Fibcd1
rno-miR-138-1-3p	Fibin
rno-miR-138-1-3p	Fkbp9
rno-miR-138-1-3p	Fkrp
rno-miR-138-1-3p	Flnb
rno-miR-138-1-3p	Flot2
rno-miR-138-1-3p	Foxa1
rno-miR-138-1-3p	Foxa2
rno-miR-138-1-3p	Foxe1
rno-miR-138-1-3p	Foxi1
rno-miR-138-1-3p	Frzb
rno-miR-138-1-3p	Fut2
rno-miR-138-1-3p	G3bp1
rno-miR-138-1-3p	G6pc
rno-miR-138-1-3p	Gabpa
rno-miR-138-1-3p	Gad1
rno-miR-138-1-3p	Gadd45g
rno-miR-138-1-3p	Ganc
rno-miR-138-1-3p	Gas2
rno-miR-138-1-3p	Gata2
rno-miR-138-1-3p	Gatad1
rno-miR-138-1-3p	Gca
rno-miR-138-1-3p	Gcgr
rno-miR-138-1-3p	Gemin7
rno-miR-138-1-3p	Gga3
rno-miR-138-1-3p	Gins2
rno-miR-138-1-3p	Gipr
rno-miR-138-1-3p	Gjd2
rno-miR-138-1-3p	Glp1r
rno-miR-138-1-3p	Glra2
rno-miR-138-1-3p	Gls
rno-miR-138-1-3p	Gls2
rno-miR-138-1-3p	Glt25d1
rno-miR-138-1-3p	Glt8d3
rno-miR-138-1-3p	Glul
rno-miR-138-1-3p	Gnai2
rno-miR-138-1-3p	Gnat1
rno-miR-138-1-3p	Gng10
rno-miR-138-1-3p	Golga1
rno-miR-138-1-3p	Golga2
rno-miR-138-1-3p	Gosr2
rno-miR-138-1-3p	Gpr174
rno-miR-138-1-3p	Gpr177
rno-miR-138-1-3p	Gpr45
rno-miR-138-1-3p	Gpr89
rno-miR-138-1-3p	Grb10
rno-miR-138-1-3p	Grhl2
rno-miR-138-1-3p	Gria2
rno-miR-138-1-3p	Grsf1
rno-miR-138-1-3p	Gsk3b
rno-miR-138-1-3p	Gtf2h3
rno-miR-138-1-3p	Gyg1
rno-miR-138-1-3p	Gypc
rno-miR-138-1-3p	Gzf1
rno-miR-138-1-3p	H1f0
rno-miR-138-1-3p	Hapln1
rno-miR-138-1-3p	Has1
rno-miR-138-1-3p	Hbegf
rno-miR-138-1-3p	Hdac6
rno-miR-138-1-3p	Hdhd3
rno-miR-138-1-3p	Hebp2
rno-miR-138-1-3p	Hip1
rno-miR-138-1-3p	Hipk1
rno-miR-138-1-3p	Hjurp
rno-miR-138-1-3p	Hltf
rno-miR-138-1-3p	Hmbox1
rno-miR-138-1-3p	Hmcn1
rno-miR-138-1-3p	Hmgb3
rno-miR-138-1-3p	Hmgn2
rno-miR-138-1-3p	Hn1
rno-miR-138-1-3p	Hnf1a
rno-miR-138-1-3p	Hnrnpa3
rno-miR-138-1-3p	Homer1
rno-miR-138-1-3p	Hook1
rno-miR-138-1-3p	Hpse
rno-miR-138-1-3p	Hrk
rno-miR-138-1-3p	Hsd17b12
rno-miR-138-1-3p	Hsd17b13
rno-miR-138-1-3p	Hspa4l
rno-miR-138-1-3p	Hspb1
rno-miR-138-1-3p	Hspb9
rno-miR-138-1-3p	Ibsp
rno-miR-138-1-3p	Icmt
rno-miR-138-1-3p	Ids
rno-miR-138-1-3p	Ifit1lb
rno-miR-138-1-3p	Igf2
rno-miR-138-1-3p	Igfbp3
rno-miR-138-1-3p	Igsf11
rno-miR-138-1-3p	Ikzf5
rno-miR-138-1-3p	Il1rn
rno-miR-138-1-3p	Il33
rno-miR-138-1-3p	Il34
rno-miR-138-1-3p	Il9r
rno-miR-138-1-3p	Impact
rno-miR-138-1-3p	Impad1
rno-miR-138-1-3p	Inhbb
rno-miR-138-1-3p	Inpp5a
rno-miR-138-1-3p	Inpp5f
rno-miR-138-1-3p	Inpp5j
rno-miR-138-1-3p	Inppl1
rno-miR-138-1-3p	Ip6k2
rno-miR-138-1-3p	Ipo11
rno-miR-138-1-3p	Irf5
rno-miR-138-1-3p	Isoc1
rno-miR-138-1-3p	Isy1
rno-miR-138-1-3p	Itfg3
rno-miR-138-1-3p	Itgb5
rno-miR-138-1-3p	Jarid1a
rno-miR-138-1-3p	Jrk
rno-miR-138-1-3p	Jub
rno-miR-138-1-3p	Jun
rno-miR-138-1-3p	Kb40
rno-miR-138-1-3p	Kcnh1
rno-miR-138-1-3p	Kcnj6
rno-miR-138-1-3p	Kcnk6
rno-miR-138-1-3p	Kcnv1
rno-miR-138-1-3p	Kctd5
rno-miR-138-1-3p	Kdm5b
rno-miR-138-1-3p	Kdr
rno-miR-138-1-3p	Kdsr
rno-miR-138-1-3p	Khdrbs3
rno-miR-138-1-3p	Kidins220
rno-miR-138-1-3p	Kif3b
rno-miR-138-1-3p	Kif3c
rno-miR-138-1-3p	Kit
rno-miR-138-1-3p	Klf12
rno-miR-138-1-3p	Klf5
rno-miR-138-1-3p	Klf6
rno-miR-138-1-3p	Klhdc5
rno-miR-138-1-3p	Klhl26
rno-miR-138-1-3p	Klhl7
rno-miR-138-1-3p	Ky
rno-miR-138-1-3p	L3mbtl2
rno-miR-138-1-3p	Lamc1
rno-miR-138-1-3p	Laptm4b
rno-miR-138-1-3p	Lcn2
rno-miR-138-1-3p	Lcp1
rno-miR-138-1-3p	Lemd2
rno-miR-138-1-3p	Lgsn
rno-miR-138-1-3p	Lhfp
rno-miR-138-1-3p	Limd1
rno-miR-138-1-3p	Lipa
rno-miR-138-1-3p	Lipt1
rno-miR-138-1-3p	Lnx2
rno-miR-138-1-3p	LOC100271845
rno-miR-138-1-3p	LOC100302372
rno-miR-138-1-3p	LOC100360616
rno-miR-138-1-3p	LOC100360737
rno-miR-138-1-3p	LOC100360957
rno-miR-138-1-3p	LOC100361177
rno-miR-138-1-3p	LOC100361700
rno-miR-138-1-3p	LOC100361750
rno-miR-138-1-3p	LOC100362279
rno-miR-138-1-3p	LOC100362464
rno-miR-138-1-3p	LOC100362676
rno-miR-138-1-3p	LOC100363005
rno-miR-138-1-3p	LOC100363074
rno-miR-138-1-3p	LOC100363777
rno-miR-138-1-3p	LOC100364366
rno-miR-138-1-3p	LOC100364687
rno-miR-138-1-3p	LOC100364919
rno-miR-138-1-3p	LOC100365269
rno-miR-138-1-3p	LOC100365491
rno-miR-138-1-3p	LOC100365958
rno-miR-138-1-3p	LOC257650
rno-miR-138-1-3p	LOC292199
rno-miR-138-1-3p	LOC302495
rno-miR-138-1-3p	LOC303259
rno-miR-138-1-3p	LOC311352
rno-miR-138-1-3p	LOC498662
rno-miR-138-1-3p	LOC499749
rno-miR-138-1-3p	LOC500726
rno-miR-138-1-3p	LOC678880
rno-miR-138-1-3p	LOC679038
rno-miR-138-1-3p	LOC679046
rno-miR-138-1-3p	LOC679383
rno-miR-138-1-3p	LOC679462
rno-miR-138-1-3p	LOC680222
rno-miR-138-1-3p	LOC680885
rno-miR-138-1-3p	LOC681004
rno-miR-138-1-3p	LOC681290
rno-miR-138-1-3p	LOC681647
rno-miR-138-1-3p	LOC682416
rno-miR-138-1-3p	LOC683512
rno-miR-138-1-3p	LOC683538
rno-miR-138-1-3p	LOC684097
rno-miR-138-1-3p	LOC684112
rno-miR-138-1-3p	LOC685808
rno-miR-138-1-3p	LOC686393
rno-miR-138-1-3p	LOC686539
rno-miR-138-1-3p	LOC686765
rno-miR-138-1-3p	LOC687090
rno-miR-138-1-3p	LOC687192
rno-miR-138-1-3p	LOC687713
rno-miR-138-1-3p	LOC688681
rno-miR-138-1-3p	LOC688717
rno-miR-138-1-3p	LOC690333
rno-miR-138-1-3p	LOC690350
rno-miR-138-1-3p	LOC690784
rno-miR-138-1-3p	LOC691138
rno-miR-138-1-3p	Lpar1
rno-miR-138-1-3p	Lpcat1
rno-miR-138-1-3p	Lpin3
rno-miR-138-1-3p	Lrch4
rno-miR-138-1-3p	Lrig2
rno-miR-138-1-3p	Lrpap1
rno-miR-138-1-3p	Lrrc1
rno-miR-138-1-3p	Lrtm2
rno-miR-138-1-3p	Lsm14a
rno-miR-138-1-3p	Ltbp2
rno-miR-138-1-3p	Luc7l3
rno-miR-138-1-3p	Ly6g5c
rno-miR-138-1-3p	Lyl1
rno-miR-138-1-3p	Lynx1
rno-miR-138-1-3p	Lypd6b
rno-miR-138-1-3p	Lzts1
rno-miR-138-1-3p	Man2a2
rno-miR-138-1-3p	Manba
rno-miR-138-1-3p	Map1b
rno-miR-138-1-3p	Map3k7
rno-miR-138-1-3p	Map3k7ip2
rno-miR-138-1-3p	Map4k5
rno-miR-138-1-3p	Mapkapk2
rno-miR-138-1-3p	Mark3
rno-miR-138-1-3p	Masp1
rno-miR-138-1-3p	Mast3
rno-miR-138-1-3p	Mca32
rno-miR-138-1-3p	Mcat
rno-miR-138-1-3p	Mcl1
rno-miR-138-1-3p	Mcoln2
rno-miR-138-1-3p	Me1
rno-miR-138-1-3p	Mfsd6
rno-miR-138-1-3p	MGC105560
rno-miR-138-1-3p	MGC95152
rno-miR-138-1-3p	Mier2
rno-miR-138-1-3p	Mitf
rno-miR-138-1-3p	Mixl1
rno-miR-138-1-3p	Mkl1
rno-miR-138-1-3p	Mkrn2
rno-miR-138-1-3p	Mlc1
rno-miR-138-1-3p	Mllt4
rno-miR-138-1-3p	Mmaa
rno-miR-138-1-3p	Mmp16
rno-miR-138-1-3p	Mmp20
rno-miR-138-1-3p	Mmp9
rno-miR-138-1-3p	Mpped1
rno-miR-138-1-3p	Mpzl2
rno-miR-138-1-3p	Mrpl10
rno-miR-138-1-3p	Mrps5
rno-miR-138-1-3p	Mrvi1
rno-miR-138-1-3p	Ms4a2
rno-miR-138-1-3p	Msl1
rno-miR-138-1-3p	Msl2l1
rno-miR-138-1-3p	Mtch2
rno-miR-138-1-3p	Mtmr1
rno-miR-138-1-3p	Mtss1
rno-miR-138-1-3p	Mul1
rno-miR-138-1-3p	Mxd1
rno-miR-138-1-3p	Myocd
rno-miR-138-1-3p	Myod1
rno-miR-138-1-3p	Naalad2
rno-miR-138-1-3p	Nab2
rno-miR-138-1-3p	Napg
rno-miR-138-1-3p	Narf
rno-miR-138-1-3p	Nat11
rno-miR-138-1-3p	Nbl1
rno-miR-138-1-3p	Ncald
rno-miR-138-1-3p	Ncbp1
rno-miR-138-1-3p	Nde1
rno-miR-138-1-3p	Ndrg4
rno-miR-138-1-3p	Ndufaf4
rno-miR-138-1-3p	Necap2
rno-miR-138-1-3p	Nedd1
rno-miR-138-1-3p	Nedd4
rno-miR-138-1-3p	Nedd9
rno-miR-138-1-3p	Nek7
rno-miR-138-1-3p	Nek9
rno-miR-138-1-3p	Nelf
rno-miR-138-1-3p	Nfasc
rno-miR-138-1-3p	Nhlrc3
rno-miR-138-1-3p	Nipal4
rno-miR-138-1-3p	Nisch
rno-miR-138-1-3p	Nkiras2
rno-miR-138-1-3p	Nlrp10
rno-miR-138-1-3p	Nol3
rno-miR-138-1-3p	Notch1
rno-miR-138-1-3p	Npat
rno-miR-138-1-3p	Nptxr
rno-miR-138-1-3p	Npy1r
rno-miR-138-1-3p	Nr3c1
rno-miR-138-1-3p	Nr4a3
rno-miR-138-1-3p	Nsun2
rno-miR-138-1-3p	Nt5dc3
rno-miR-138-1-3p	Ntng1
rno-miR-138-1-3p	Nudt7
rno-miR-138-1-3p	Nup98
rno-miR-138-1-3p	Nusap1
rno-miR-138-1-3p	Nxph1
rno-miR-138-1-3p	Obfc2b
rno-miR-138-1-3p	Odf3l1
rno-miR-138-1-3p	Ogt
rno-miR-138-1-3p	Olfml2a
rno-miR-138-1-3p	Olig1
rno-miR-138-1-3p	Orai2
rno-miR-138-1-3p	Osbpl2
rno-miR-138-1-3p	Osgin1
rno-miR-138-1-3p	Pacsin2
rno-miR-138-1-3p	Padi2
rno-miR-138-1-3p	Pak3
rno-miR-138-1-3p	Pald
rno-miR-138-1-3p	Palm
rno-miR-138-1-3p	Panx2
rno-miR-138-1-3p	Paqr5
rno-miR-138-1-3p	Park7
rno-miR-138-1-3p	Pbrm1
rno-miR-138-1-3p	Pdcd1
rno-miR-138-1-3p	Pdlim2
rno-miR-138-1-3p	Pdrg1
rno-miR-138-1-3p	Per2
rno-miR-138-1-3p	Pex19
rno-miR-138-1-3p	Pgk1
rno-miR-138-1-3p	Phf17
rno-miR-138-1-3p	Phf20l1
rno-miR-138-1-3p	Pik3c2a
rno-miR-138-1-3p	Pink1
rno-miR-138-1-3p	Pkn2
rno-miR-138-1-3p	Pla2g2c
rno-miR-138-1-3p	Plagl2
rno-miR-138-1-3p	Pld1
rno-miR-138-1-3p	Pld2
rno-miR-138-1-3p	Plekha1
rno-miR-138-1-3p	Plekhb1
rno-miR-138-1-3p	Plekhb2
rno-miR-138-1-3p	Plekhm1
rno-miR-138-1-3p	Pm20d2
rno-miR-138-1-3p	Pnma2
rno-miR-138-1-3p	Pnmal1
rno-miR-138-1-3p	Pnpt1
rno-miR-138-1-3p	Polm
rno-miR-138-1-3p	Pot1b
rno-miR-138-1-3p	Pou1f1
rno-miR-138-1-3p	Ppap2b
rno-miR-138-1-3p	Ppapdc2
rno-miR-138-1-3p	Ppcdc
rno-miR-138-1-3p	Ppm1l
rno-miR-138-1-3p	Ppp1cb
rno-miR-138-1-3p	Ppp1r2
rno-miR-138-1-3p	Ppp1r3a
rno-miR-138-1-3p	Ppp1r3c
rno-miR-138-1-3p	Ppp1r3d
rno-miR-138-1-3p	Ppp2cb
rno-miR-138-1-3p	Ppp2r3a
rno-miR-138-1-3p	Ppp3r1
rno-miR-138-1-3p	Ppp4r2
rno-miR-138-1-3p	Pptc7
rno-miR-138-1-3p	Prdx3
rno-miR-138-1-3p	Prf1
rno-miR-138-1-3p	Prickle2
rno-miR-138-1-3p	Prima1
rno-miR-138-1-3p	Prkaa2
rno-miR-138-1-3p	Prkce
rno-miR-138-1-3p	Prpf18
rno-miR-138-1-3p	Prpf38b
rno-miR-138-1-3p	Prr18
rno-miR-138-1-3p	Prr6
rno-miR-138-1-3p	Prrx2
rno-miR-138-1-3p	Prrxl1
rno-miR-138-1-3p	Psd2
rno-miR-138-1-3p	Psg19
rno-miR-138-1-3p	Psmd11
rno-miR-138-1-3p	Psrc1
rno-miR-138-1-3p	Pttg1ip
rno-miR-138-1-3p	Rab10
rno-miR-138-1-3p	Rab11fip3
rno-miR-138-1-3p	Rab18
rno-miR-138-1-3p	Rab1b
rno-miR-138-1-3p	Rab22a
rno-miR-138-1-3p	Rab31
rno-miR-138-1-3p	Rab3gap2
rno-miR-138-1-3p	Rab5b
rno-miR-138-1-3p	Rab5c
rno-miR-138-1-3p	Rabgap1
rno-miR-138-1-3p	Rabl5
rno-miR-138-1-3p	Rad52
rno-miR-138-1-3p	Rad54l
rno-miR-138-1-3p	Rad54l2
rno-miR-138-1-3p	Rag1
rno-miR-138-1-3p	Ranbp10
rno-miR-138-1-3p	Ranbp3l
rno-miR-138-1-3p	Rap1gds1
rno-miR-138-1-3p	Rarb
rno-miR-138-1-3p	Rasl11b
rno-miR-138-1-3p	Rasl12
rno-miR-138-1-3p	Rassf5
rno-miR-138-1-3p	Rbbp5
rno-miR-138-1-3p	Rbm38
rno-miR-138-1-3p	Rbpj
rno-miR-138-1-3p	Rcl1
rno-miR-138-1-3p	Reck
rno-miR-138-1-3p	Ret
rno-miR-138-1-3p	Rexo4
rno-miR-138-1-3p	Rfc1
rno-miR-138-1-3p	Rfx7
rno-miR-138-1-3p	RGD1303271
rno-miR-138-1-3p	RGD1304610
rno-miR-138-1-3p	RGD1304694
rno-miR-138-1-3p	RGD1305464
rno-miR-138-1-3p	RGD1305680
rno-miR-138-1-3p	RGD1306233
rno-miR-138-1-3p	RGD1306502
rno-miR-138-1-3p	RGD1306924
rno-miR-138-1-3p	RGD1307235
rno-miR-138-1-3p	RGD1307443
rno-miR-138-1-3p	RGD1307461
rno-miR-138-1-3p	RGD1307704
rno-miR-138-1-3p	RGD1308048
rno-miR-138-1-3p	RGD1308165
rno-miR-138-1-3p	RGD1308722
rno-miR-138-1-3p	RGD1308874
rno-miR-138-1-3p	RGD1309095
rno-miR-138-1-3p	RGD1309313
rno-miR-138-1-3p	RGD1310352
rno-miR-138-1-3p	RGD1310552
rno-miR-138-1-3p	RGD1310553
rno-miR-138-1-3p	RGD1310727
rno-miR-138-1-3p	RGD1311021
rno-miR-138-1-3p	RGD1311267
rno-miR-138-1-3p	RGD1311493
rno-miR-138-1-3p	RGD1311703
rno-miR-138-1-3p	RGD1559600
rno-miR-138-1-3p	RGD1559786
rno-miR-138-1-3p	RGD1560455
rno-miR-138-1-3p	RGD1560691
rno-miR-138-1-3p	RGD1560888
rno-miR-138-1-3p	RGD1561065
rno-miR-138-1-3p	RGD1561149
rno-miR-138-1-3p	RGD1561241
rno-miR-138-1-3p	RGD1561444
rno-miR-138-1-3p	RGD1561557
rno-miR-138-1-3p	RGD1562012
rno-miR-138-1-3p	RGD1562174
rno-miR-138-1-3p	RGD1562218
rno-miR-138-1-3p	RGD1562291
rno-miR-138-1-3p	RGD1562416
rno-miR-138-1-3p	RGD1562420
rno-miR-138-1-3p	RGD1562608
rno-miR-138-1-3p	RGD1562638
rno-miR-138-1-3p	RGD1562726
rno-miR-138-1-3p	RGD1562963
rno-miR-138-1-3p	RGD1563073
rno-miR-138-1-3p	RGD1563217
rno-miR-138-1-3p	RGD1563684
rno-miR-138-1-3p	RGD1564174
rno-miR-138-1-3p	RGD1564387
rno-miR-138-1-3p	RGD1564541
rno-miR-138-1-3p	RGD1564943
rno-miR-138-1-3p	RGD1565043
rno-miR-138-1-3p	RGD1565411
rno-miR-138-1-3p	RGD1565432
rno-miR-138-1-3p	RGD1565591
rno-miR-138-1-3p	RGD1566130
rno-miR-138-1-3p	Rgl1
rno-miR-138-1-3p	Rhobtb3
rno-miR-138-1-3p	Rhoc
rno-miR-138-1-3p	Rhot1
rno-miR-138-1-3p	Ric8a
rno-miR-138-1-3p	Rimbp3
rno-miR-138-1-3p	Ripk1
rno-miR-138-1-3p	Rlf
rno-miR-138-1-3p	Rnf138
rno-miR-138-1-3p	Rnf152
rno-miR-138-1-3p	Rnf20
rno-miR-138-1-3p	Rpe
rno-miR-138-1-3p	Rpl19
rno-miR-138-1-3p	Rprm
rno-miR-138-1-3p	Rsbn1
rno-miR-138-1-3p	RT1-T24-3
rno-miR-138-1-3p	Runx1t1
rno-miR-138-1-3p	Rxrg
rno-miR-138-1-3p	Rybp
rno-miR-138-1-3p	Sacm1l
rno-miR-138-1-3p	Samd5
rno-miR-138-1-3p	Saps1
rno-miR-138-1-3p	Sarm1
rno-miR-138-1-3p	Scn5a
rno-miR-138-1-3p	Scn9a
rno-miR-138-1-3p	Sdc1
rno-miR-138-1-3p	Sdpr
rno-miR-138-1-3p	Sec63
rno-miR-138-1-3p	Sema4d
rno-miR-138-1-3p	Sema5a
rno-miR-138-1-3p	Sema6d
rno-miR-138-1-3p	Sep15
rno-miR-138-1-3p	Sephs1
rno-miR-138-1-3p	Serpina5
rno-miR-138-1-3p	Serpina6
rno-miR-138-1-3p	Serpina9
rno-miR-138-1-3p	Serpinb12
rno-miR-138-1-3p	Serpinh1
rno-miR-138-1-3p	Setd2
rno-miR-138-1-3p	Sf3b1
rno-miR-138-1-3p	Sfrp4
rno-miR-138-1-3p	Sh3glb2
rno-miR-138-1-3p	Shc2
rno-miR-138-1-3p	Shisa3
rno-miR-138-1-3p	Shisa5
rno-miR-138-1-3p	Shisa7
rno-miR-138-1-3p	Shroom2
rno-miR-138-1-3p	Siae
rno-miR-138-1-3p	siat7D
rno-miR-138-1-3p	Siglec1
rno-miR-138-1-3p	Sirt3
rno-miR-138-1-3p	Sirt4
rno-miR-138-1-3p	Slc12a5
rno-miR-138-1-3p	Slc19a1
rno-miR-138-1-3p	Slc19a2
rno-miR-138-1-3p	Slc22a3
rno-miR-138-1-3p	Slc22a5
rno-miR-138-1-3p	Slc24a2
rno-miR-138-1-3p	Slc25a23
rno-miR-138-1-3p	Slc25a30
rno-miR-138-1-3p	Slc25a36
rno-miR-138-1-3p	Slc26a1
rno-miR-138-1-3p	Slc2a8
rno-miR-138-1-3p	Slc35b3
rno-miR-138-1-3p	Slc35b4
rno-miR-138-1-3p	Slc39a7
rno-miR-138-1-3p	Slc6a15
rno-miR-138-1-3p	Slc6a8
rno-miR-138-1-3p	Slc7a1
rno-miR-138-1-3p	Slc7a5
rno-miR-138-1-3p	Slc7a8
rno-miR-138-1-3p	Slc9a5
rno-miR-138-1-3p	Slfn2
rno-miR-138-1-3p	Slitrk6
rno-miR-138-1-3p	Smcr8
rno-miR-138-1-3p	Snap23
rno-miR-138-1-3p	Snapc2
rno-miR-138-1-3p	Snx33
rno-miR-138-1-3p	Snx6
rno-miR-138-1-3p	Socs5
rno-miR-138-1-3p	Sorbs3
rno-miR-138-1-3p	Sos2
rno-miR-138-1-3p	Spag6
rno-miR-138-1-3p	Speg
rno-miR-138-1-3p	Spn
rno-miR-138-1-3p	Spon2
rno-miR-138-1-3p	Spryd4
rno-miR-138-1-3p	Sptbn2
rno-miR-138-1-3p	Srms
rno-miR-138-1-3p	Ssr3
rno-miR-138-1-3p	Sstr3
rno-miR-138-1-3p	St6gal1
rno-miR-138-1-3p	Stam
rno-miR-138-1-3p	ste2
rno-miR-138-1-3p	Steap2
rno-miR-138-1-3p	Stil
rno-miR-138-1-3p	Stk10
rno-miR-138-1-3p	Stk38
rno-miR-138-1-3p	Stom
rno-miR-138-1-3p	Stx16
rno-miR-138-1-3p	Stx6
rno-miR-138-1-3p	Styxl1
rno-miR-138-1-3p	Sult1e1
rno-miR-138-1-3p	Supt6h
rno-miR-138-1-3p	Surf4
rno-miR-138-1-3p	Suv39h2
rno-miR-138-1-3p	Sv2a
rno-miR-138-1-3p	Sycp2
rno-miR-138-1-3p	Synpo2
rno-miR-138-1-3p	Syt15
rno-miR-138-1-3p	Syt17
rno-miR-138-1-3p	Syt2
rno-miR-138-1-3p	Syvn1
rno-miR-138-1-3p	Taf1
rno-miR-138-1-3p	Tagln
rno-miR-138-1-3p	Tapbp
rno-miR-138-1-3p	Tbc1d2
rno-miR-138-1-3p	Tbc1d22b
rno-miR-138-1-3p	Tbck
rno-miR-138-1-3p	Tbl1xr1
rno-miR-138-1-3p	Tbx22
rno-miR-138-1-3p	Tbxa2r
rno-miR-138-1-3p	Tcf7
rno-miR-138-1-3p	Tcfap2a
rno-miR-138-1-3p	Tcp11l1
rno-miR-138-1-3p	Tek
rno-miR-138-1-3p	Tex2
rno-miR-138-1-3p	Tfeb
rno-miR-138-1-3p	Tff3
rno-miR-138-1-3p	Thoc3
rno-miR-138-1-3p	Timm44
rno-miR-138-1-3p	Timp2
rno-miR-138-1-3p	Tipin
rno-miR-138-1-3p	Tmcc1
rno-miR-138-1-3p	Tmeff1
rno-miR-138-1-3p	Tmem127
rno-miR-138-1-3p	Tmem168
rno-miR-138-1-3p	Tmem181
rno-miR-138-1-3p	Tmem185a
rno-miR-138-1-3p	Tmem2
rno-miR-138-1-3p	Tmem214
rno-miR-138-1-3p	Tmem229b
rno-miR-138-1-3p	Tmem55a
rno-miR-138-1-3p	Tmem57
rno-miR-138-1-3p	Tmprss5
rno-miR-138-1-3p	Tnfaip1
rno-miR-138-1-3p	Tnfaip2
rno-miR-138-1-3p	Tnfrsf18
rno-miR-138-1-3p	Tnmd
rno-miR-138-1-3p	Tom1l2
rno-miR-138-1-3p	Tp63
rno-miR-138-1-3p	Tpbpa
rno-miR-138-1-3p	Tpcn2
rno-miR-138-1-3p	Traf3
rno-miR-138-1-3p	Trim2
rno-miR-138-1-3p	Trim8
rno-miR-138-1-3p	Trove2
rno-miR-138-1-3p	Trpc1
rno-miR-138-1-3p	Trpv5
rno-miR-138-1-3p	Tsc22d2
rno-miR-138-1-3p	Tshr
rno-miR-138-1-3p	Tspan1
rno-miR-138-1-3p	Tspan18
rno-miR-138-1-3p	Tssk4
rno-miR-138-1-3p	Ttc38
rno-miR-138-1-3p	Ttpal
rno-miR-138-1-3p	Tubb5
rno-miR-138-1-3p	Tuft1
rno-miR-138-1-3p	Tusc2
rno-miR-138-1-3p	Twsg1
rno-miR-138-1-3p	Txlna
rno-miR-138-1-3p	Txlnb
rno-miR-138-1-3p	Ube2b
rno-miR-138-1-3p	Ube2cbp
rno-miR-138-1-3p	Ube2i
rno-miR-138-1-3p	Ube2k
rno-miR-138-1-3p	Ube2m
rno-miR-138-1-3p	Ube2o
rno-miR-138-1-3p	Ube2q2
rno-miR-138-1-3p	Ube2v2
rno-miR-138-1-3p	Ube3a
rno-miR-138-1-3p	Ube4a
rno-miR-138-1-3p	Ubn2
rno-miR-138-1-3p	Ubox5
rno-miR-138-1-3p	Ubr7
rno-miR-138-1-3p	Ubxn2b
rno-miR-138-1-3p	Ugdh
rno-miR-138-1-3p	Ulk2
rno-miR-138-1-3p	Uqcrh
rno-miR-138-1-3p	Ush1c
rno-miR-138-1-3p	Usp20
rno-miR-138-1-3p	Usp35
rno-miR-138-1-3p	Uvrag
rno-miR-138-1-3p	Vash2
rno-miR-138-1-3p	Vat1
rno-miR-138-1-3p	Vegfb
rno-miR-138-1-3p	Vipr1
rno-miR-138-1-3p	Vom2r31
rno-miR-138-1-3p	Vps18
rno-miR-138-1-3p	Vps52
rno-miR-138-1-3p	Vwa5a
rno-miR-138-1-3p	Vwc2
rno-miR-138-1-3p	Wasl
rno-miR-138-1-3p	Wdfy1
rno-miR-138-1-3p	Wdfy3
rno-miR-138-1-3p	Wdr45
rno-miR-138-1-3p	Whsc1
rno-miR-138-1-3p	Wiz
rno-miR-138-1-3p	Wnt10b
rno-miR-138-1-3p	Wnt3
rno-miR-138-1-3p	Wrb
rno-miR-138-1-3p	Yipf2
rno-miR-138-1-3p	Zbed3
rno-miR-138-1-3p	Zbp1
rno-miR-138-1-3p	Zbtb9
rno-miR-138-1-3p	Zdhhc23
rno-miR-138-1-3p	Zdhhc3
rno-miR-138-1-3p	Zfhx4
rno-miR-138-1-3p	Zfp192
rno-miR-138-1-3p	Zfp212
rno-miR-138-1-3p	Zfp275
rno-miR-138-1-3p	Zfp318
rno-miR-138-1-3p	Zfp329
rno-miR-138-1-3p	Zfp772
rno-miR-138-1-3p	Zfp828
rno-miR-138-1-3p	Zfp91
rno-miR-138-1-3p	Zfx
rno-miR-138-1-3p	Zmat3
rno-miR-138-1-3p	Znf282
rno-miR-138-1-3p	Znf292
rno-miR-138-1-3p	Znf512
rno-miR-138-1-3p	Znf512b
rno-miR-138-1-3p	Znf593
rno-miR-138-1-3p	Znf667
rno-miR-138-1-3p	Znf787
rno-miR-138-5p	Aak1
rno-miR-138-5p	Aanat
rno-miR-138-5p	Aass
rno-miR-138-5p	Abcb9
rno-miR-138-5p	Abcd2
rno-miR-138-5p	Abcd3
rno-miR-138-5p	Abce1
rno-miR-138-5p	Abcf2
rno-miR-138-5p	Abcg1
rno-miR-138-5p	Abhd13
rno-miR-138-5p	Abhd6
rno-miR-138-5p	Abi3
rno-miR-138-5p	Abr
rno-miR-138-5p	Abtb2
rno-miR-138-5p	Acad11
rno-miR-138-5p	Acap3
rno-miR-138-5p	Accn1
rno-miR-138-5p	Acot3
rno-miR-138-5p	Acss1
rno-miR-138-5p	Actr1a
rno-miR-138-5p	Adam17
rno-miR-138-5p	Adam19
rno-miR-138-5p	Adam30
rno-miR-138-5p	Adam7
rno-miR-138-5p	Adamts14
rno-miR-138-5p	Adamts19
rno-miR-138-5p	Adamtsl2
rno-miR-138-5p	Adamtsl3
rno-miR-138-5p	Adat1
rno-miR-138-5p	Adck4
rno-miR-138-5p	Adcy6
rno-miR-138-5p	Add3
rno-miR-138-5p	Adh1
rno-miR-138-5p	Adh7
rno-miR-138-5p	Adnp
rno-miR-138-5p	Aen
rno-miR-138-5p	Afap1
rno-miR-138-5p	Aff4
rno-miR-138-5p	Afg3l2
rno-miR-138-5p	Agk
rno-miR-138-5p	Agl
rno-miR-138-5p	Agpat1
rno-miR-138-5p	Agpat2
rno-miR-138-5p	Agpat3
rno-miR-138-5p	Ahcyl2
rno-miR-138-5p	Ahdc1
rno-miR-138-5p	Ahsg
rno-miR-138-5p	aicda
rno-miR-138-5p	Aif1l
rno-miR-138-5p	Aifm2
rno-miR-138-5p	Aire
rno-miR-138-5p	Ak1
rno-miR-138-5p	Ak7
rno-miR-138-5p	Akap13
rno-miR-138-5p	Akap2
rno-miR-138-5p	Akr1b10
rno-miR-138-5p	Akt1s1
rno-miR-138-5p	Aldh1a1
rno-miR-138-5p	Aldh1a7
rno-miR-138-5p	Aldh1l2
rno-miR-138-5p	Alg13
rno-miR-138-5p	Alg6
rno-miR-138-5p	Alg9
rno-miR-138-5p	Alox12
rno-miR-138-5p	Als2cl
rno-miR-138-5p	Alx1
rno-miR-138-5p	Ammecr1l
rno-miR-138-5p	Amotl2
rno-miR-138-5p	Ampd2
rno-miR-138-5p	Amz2
rno-miR-138-5p	Anapc1
rno-miR-138-5p	Anapc11
rno-miR-138-5p	Ank1
rno-miR-138-5p	Ankh
rno-miR-138-5p	Ankrd10
rno-miR-138-5p	Ankrd12
rno-miR-138-5p	Ankrd13a
rno-miR-138-5p	Ankrd2
rno-miR-138-5p	Ankrd28
rno-miR-138-5p	Ankrd29
rno-miR-138-5p	Ankrd46
rno-miR-138-5p	Ankrd54
rno-miR-138-5p	Ankrd58
rno-miR-138-5p	Ankrd6
rno-miR-138-5p	Anks1a
rno-miR-138-5p	Ano1
rno-miR-138-5p	Ano10
rno-miR-138-5p	Ano6
rno-miR-138-5p	Antxr1
rno-miR-138-5p	Anxa10
rno-miR-138-5p	Anxa5
rno-miR-138-5p	Anxa6
rno-miR-138-5p	Ap1b1
rno-miR-138-5p	Ap3m1
rno-miR-138-5p	Apba1
rno-miR-138-5p	Apbb2
rno-miR-138-5p	Apc2
rno-miR-138-5p	Api5
rno-miR-138-5p	Aplnr
rno-miR-138-5p	Aplp2
rno-miR-138-5p	Apob48r
rno-miR-138-5p	Appbp2
rno-miR-138-5p	Appl2
rno-miR-138-5p	Aqp4
rno-miR-138-5p	Aqr
rno-miR-138-5p	Arap2
rno-miR-138-5p	Arc
rno-miR-138-5p	Ard1b
rno-miR-138-5p	Arf2
rno-miR-138-5p	Arfgef1
rno-miR-138-5p	Arfgef2
rno-miR-138-5p	Arfip2
rno-miR-138-5p	Arhgap1
rno-miR-138-5p	Arhgap10
rno-miR-138-5p	Arhgap12
rno-miR-138-5p	Arhgap22
rno-miR-138-5p	Arhgap4
rno-miR-138-5p	Arhgef18
rno-miR-138-5p	Arhgef19
rno-miR-138-5p	Arhgef2
rno-miR-138-5p	Arhgef3
rno-miR-138-5p	Arid3b
rno-miR-138-5p	Arl13a
rno-miR-138-5p	Arl15
rno-miR-138-5p	Arl2
rno-miR-138-5p	Arl2bp
rno-miR-138-5p	Arl5b
rno-miR-138-5p	Arl5c
rno-miR-138-5p	Arl8a
rno-miR-138-5p	Armc8
rno-miR-138-5p	Armc9
rno-miR-138-5p	Armcx2
rno-miR-138-5p	Arnt2
rno-miR-138-5p	Art4
rno-miR-138-5p	Arvcf
rno-miR-138-5p	Asam
rno-miR-138-5p	Asb13
rno-miR-138-5p	Asf1b
rno-miR-138-5p	Aspg
rno-miR-138-5p	Aspscr1
rno-miR-138-5p	Astn1
rno-miR-138-5p	Atg12
rno-miR-138-5p	Atg2a
rno-miR-138-5p	Atg4b
rno-miR-138-5p	Atg7
rno-miR-138-5p	Atmin
rno-miR-138-5p	Atoh8
rno-miR-138-5p	Atp13a5
rno-miR-138-5p	Atp1a2
rno-miR-138-5p	Atp1b4
rno-miR-138-5p	Atp2a3
rno-miR-138-5p	Atp2b1
rno-miR-138-5p	Atp2b2
rno-miR-138-5p	Atp4b
rno-miR-138-5p	Atp6v0a1
rno-miR-138-5p	Atp6v0c
rno-miR-138-5p	Atp6v1g3
rno-miR-138-5p	Atp8a1
rno-miR-138-5p	Atp9b
rno-miR-138-5p	Atpaf1
rno-miR-138-5p	Axin1
rno-miR-138-5p	Azgp1
rno-miR-138-5p	B3galnt2
rno-miR-138-5p	B3galt2
rno-miR-138-5p	B3galt5
rno-miR-138-5p	B3gnt3
rno-miR-138-5p	B3gnt6
rno-miR-138-5p	Bai1
rno-miR-138-5p	Bak1
rno-miR-138-5p	Bap1
rno-miR-138-5p	Barx1
rno-miR-138-5p	Baz1b
rno-miR-138-5p	Bbs1
rno-miR-138-5p	Bcan
rno-miR-138-5p	Bcas3
rno-miR-138-5p	Bckdk
rno-miR-138-5p	Bcl2l2
rno-miR-138-5p	Bcl9l
rno-miR-138-5p	Bcmo1
rno-miR-138-5p	Bend5
rno-miR-138-5p	Bend6
rno-miR-138-5p	Bet1l
rno-miR-138-5p	Bhmt
rno-miR-138-5p	Bicd2
rno-miR-138-5p	Bmp1
rno-miR-138-5p	Bnc1
rno-miR-138-5p	Bnip3l
rno-miR-138-5p	Brunol5
rno-miR-138-5p	Btbd12
rno-miR-138-5p	Btbd6
rno-miR-138-5p	Btg1
rno-miR-138-5p	Btrc
rno-miR-138-5p	Bud31
rno-miR-138-5p	Bxdc2
rno-miR-138-5p	C1qc
rno-miR-138-5p	C8a
rno-miR-138-5p	C8b
rno-miR-138-5p	Cab39
rno-miR-138-5p	Cables2
rno-miR-138-5p	Cabp7
rno-miR-138-5p	Cachd1
rno-miR-138-5p	Cacna1b
rno-miR-138-5p	Cacna1d
rno-miR-138-5p	Cacna1g
rno-miR-138-5p	Cacna1h
rno-miR-138-5p	Calb2
rno-miR-138-5p	Calcr
rno-miR-138-5p	Caly
rno-miR-138-5p	Camk2b
rno-miR-138-5p	Camkk1
rno-miR-138-5p	Camsap1
rno-miR-138-5p	Cap1
rno-miR-138-5p	Capn1
rno-miR-138-5p	Capn7
rno-miR-138-5p	Caprin1
rno-miR-138-5p	Capza2
rno-miR-138-5p	Car11
rno-miR-138-5p	Car6
rno-miR-138-5p	Carm1
rno-miR-138-5p	Casp2
rno-miR-138-5p	Casp3
rno-miR-138-5p	Casp7
rno-miR-138-5p	Casp9
rno-miR-138-5p	Casq1
rno-miR-138-5p	Casq2
rno-miR-138-5p	Cav3
rno-miR-138-5p	Cbara1
rno-miR-138-5p	Cbfa2t2
rno-miR-138-5p	Cbln4
rno-miR-138-5p	Cbx6
rno-miR-138-5p	Cbx7
rno-miR-138-5p	Ccbp2
rno-miR-138-5p	Ccdc134
rno-miR-138-5p	Ccdc21
rno-miR-138-5p	Ccdc25
rno-miR-138-5p	Ccdc75
rno-miR-138-5p	Ccdc82
rno-miR-138-5p	Ccdc97
rno-miR-138-5p	Ccl24
rno-miR-138-5p	Ccna1
rno-miR-138-5p	Ccnc
rno-miR-138-5p	Ccnd1
rno-miR-138-5p	Ccnd3
rno-miR-138-5p	Ccne1
rno-miR-138-5p	Ccnjl
rno-miR-138-5p	Ccny
rno-miR-138-5p	Ccnyl1
rno-miR-138-5p	Ccr9
rno-miR-138-5p	Cct3
rno-miR-138-5p	Cct8
rno-miR-138-5p	Cd200
rno-miR-138-5p	Cd226
rno-miR-138-5p	Cd2bp2
rno-miR-138-5p	Cd44
rno-miR-138-5p	Cd59
rno-miR-138-5p	Cd83
rno-miR-138-5p	Cdan1
rno-miR-138-5p	Cdc123
rno-miR-138-5p	Cdc25a
rno-miR-138-5p	Cdc26
rno-miR-138-5p	Cdc2l6
rno-miR-138-5p	Cdc42ep4
rno-miR-138-5p	Cdc42se1
rno-miR-138-5p	Cdc42se2
rno-miR-138-5p	Cdc6
rno-miR-138-5p	Cdcp1
rno-miR-138-5p	Cdh2
rno-miR-138-5p	Cdh22
rno-miR-138-5p	Cdig2
rno-miR-138-5p	Cdk10
rno-miR-138-5p	Cdk5
rno-miR-138-5p	Cdk5rap3
rno-miR-138-5p	Cdkn1c
rno-miR-138-5p	Cdkn2d
rno-miR-138-5p	Cdyl
rno-miR-138-5p	Cdyl2
rno-miR-138-5p	Ceacam1
rno-miR-138-5p	Celsr1
rno-miR-138-5p	Celsr3
rno-miR-138-5p	Cenpf
rno-miR-138-5p	Cenpm
rno-miR-138-5p	Cep350
rno-miR-138-5p	Cerk
rno-miR-138-5p	Ces8
rno-miR-138-5p	Cfl1
rno-miR-138-5p	Cftr
rno-miR-138-5p	Chaf1a
rno-miR-138-5p	Chchd8
rno-miR-138-5p	Chd6
rno-miR-138-5p	Cherp
rno-miR-138-5p	Chmp1b
rno-miR-138-5p	Chn1
rno-miR-138-5p	Chpf
rno-miR-138-5p	Chrna10
rno-miR-138-5p	Chst14
rno-miR-138-5p	Chuk
rno-miR-138-5p	Cidec
rno-miR-138-5p	Ciita
rno-miR-138-5p	Ckap4
rno-miR-138-5p	Clasp1
rno-miR-138-5p	Clca3
rno-miR-138-5p	Clcn7
rno-miR-138-5p	Cldn12
rno-miR-138-5p	Cldn17
rno-miR-138-5p	Cldn19
rno-miR-138-5p	Cldn22
rno-miR-138-5p	Cldn4
rno-miR-138-5p	Clec16a
rno-miR-138-5p	Clec1a
rno-miR-138-5p	Clec5a
rno-miR-138-5p	Clic5
rno-miR-138-5p	Clip1
rno-miR-138-5p	Clip2
rno-miR-138-5p	Cln5
rno-miR-138-5p	Clns1a
rno-miR-138-5p	Clspn
rno-miR-138-5p	Clstn1
rno-miR-138-5p	Cml1
rno-miR-138-5p	Cmtm3
rno-miR-138-5p	Cndp1
rno-miR-138-5p	Cnga4
rno-miR-138-5p	Cnot8
rno-miR-138-5p	Cnpy2
rno-miR-138-5p	Cnr2
rno-miR-138-5p	Cntn2
rno-miR-138-5p	Col11a2
rno-miR-138-5p	Col12a1
rno-miR-138-5p	Col1a1
rno-miR-138-5p	Col4a1
rno-miR-138-5p	Col4a2
rno-miR-138-5p	Col4a3bp
rno-miR-138-5p	Colec11
rno-miR-138-5p	Commd10
rno-miR-138-5p	Commd2
rno-miR-138-5p	Comt
rno-miR-138-5p	Coq10b
rno-miR-138-5p	Coq9
rno-miR-138-5p	Coro2b
rno-miR-138-5p	Coro6
rno-miR-138-5p	Coro7
rno-miR-138-5p	Cotl1
rno-miR-138-5p	Cpg1
rno-miR-138-5p	Cplx3
rno-miR-138-5p	Cpm
rno-miR-138-5p	Cpsf4
rno-miR-138-5p	Cpt1b
rno-miR-138-5p	Crat
rno-miR-138-5p	Creb3l1
rno-miR-138-5p	Creg1
rno-miR-138-5p	Crisp4
rno-miR-138-5p	Crispld2
rno-miR-138-5p	Cryaa
rno-miR-138-5p	Csda
rno-miR-138-5p	Csdc2
rno-miR-138-5p	Csde1
rno-miR-138-5p	Csf1
rno-miR-138-5p	Csf1r
rno-miR-138-5p	Csf2rb
rno-miR-138-5p	Cstf1
rno-miR-138-5p	Ctdspl
rno-miR-138-5p	Ctla2a
rno-miR-138-5p	Ctnnal1
rno-miR-138-5p	Ctnnbip1
rno-miR-138-5p	Ctsh
rno-miR-138-5p	Ctsk
rno-miR-138-5p	Cttn
rno-miR-138-5p	Cttnbp2nl
rno-miR-138-5p	Cul1
rno-miR-138-5p	Cul2
rno-miR-138-5p	Cxcl1
rno-miR-138-5p	Cxcl12
rno-miR-138-5p	Cxxc1
rno-miR-138-5p	Cyb5r1
rno-miR-138-5p	Cybrd1
rno-miR-138-5p	Cygb
rno-miR-138-5p	Cyp11b1
rno-miR-138-5p	Cyp11b2
rno-miR-138-5p	Cyp1a1
rno-miR-138-5p	Cyp26b1
rno-miR-138-5p	Cyp2a2
rno-miR-138-5p	Cyp3a18
rno-miR-138-5p	Cyp4a2
rno-miR-138-5p	Cyp4a3
rno-miR-138-5p	Cyp4v3
rno-miR-138-5p	Cyp51
rno-miR-138-5p	Cyp8b1
rno-miR-138-5p	Cys1
rno-miR-138-5p	Cyth4
rno-miR-138-5p	Cyyr1
rno-miR-138-5p	Dap
rno-miR-138-5p	Dapp1
rno-miR-138-5p	Dbn1
rno-miR-138-5p	Dbndd2
rno-miR-138-5p	Dbx2
rno-miR-138-5p	Dchs1
rno-miR-138-5p	Dclk1
rno-miR-138-5p	Dclk3
rno-miR-138-5p	Dctd
rno-miR-138-5p	Dcun1d2
rno-miR-138-5p	Dcun1d4
rno-miR-138-5p	Dcx
rno-miR-138-5p	Dda1
rno-miR-138-5p	Ddah1
rno-miR-138-5p	Ddb1
rno-miR-138-5p	Ddn
rno-miR-138-5p	Ddx19b
rno-miR-138-5p	Ddx3y
rno-miR-138-5p	Ddx41
rno-miR-138-5p	Def8
rno-miR-138-5p	Dek
rno-miR-138-5p	Dennd1a
rno-miR-138-5p	Depdc5
rno-miR-138-5p	Derl1
rno-miR-138-5p	Dffa
rno-miR-138-5p	Dfna5
rno-miR-138-5p	Dgcr8
rno-miR-138-5p	Dgkg
rno-miR-138-5p	Dhps
rno-miR-138-5p	Dhx35
rno-miR-138-5p	Dicer1
rno-miR-138-5p	Dio1
rno-miR-138-5p	Dip2b
rno-miR-138-5p	Diras1
rno-miR-138-5p	Disp2
rno-miR-138-5p	Dkk3
rno-miR-138-5p	Dlc1
rno-miR-138-5p	Dlk2
rno-miR-138-5p	Dlx3
rno-miR-138-5p	Dmbx1
rno-miR-138-5p	Dmrtc1c
rno-miR-138-5p	Dnaja3
rno-miR-138-5p	Dnajb13
rno-miR-138-5p	Dnajc27
rno-miR-138-5p	Dnajc5g
rno-miR-138-5p	Dnm1
rno-miR-138-5p	Dock6
rno-miR-138-5p	Dock9
rno-miR-138-5p	Dot1l
rno-miR-138-5p	Dph3
rno-miR-138-5p	Dpp4
rno-miR-138-5p	Dpp8
rno-miR-138-5p	Dpp9
rno-miR-138-5p	Dpy19l1
rno-miR-138-5p	Dpy19l3
rno-miR-138-5p	Dpysl4
rno-miR-138-5p	Dpysl5
rno-miR-138-5p	Dscr3
rno-miR-138-5p	Dsg1b
rno-miR-138-5p	Dtnb
rno-miR-138-5p	Dus4l
rno-miR-138-5p	Dusp13
rno-miR-138-5p	Dusp6
rno-miR-138-5p	Dusp7
rno-miR-138-5p	Duxbl
rno-miR-138-5p	Dvl2
rno-miR-138-5p	Dync1li2
rno-miR-138-5p	Dynlt1
rno-miR-138-5p	Dyrk2
rno-miR-138-5p	E2f5
rno-miR-138-5p	E2f7
rno-miR-138-5p	Ebag9
rno-miR-138-5p	Ebf2
rno-miR-138-5p	Ecel1
rno-miR-138-5p	Edf1
rno-miR-138-5p	Ednra
rno-miR-138-5p	Efha1
rno-miR-138-5p	Efhd1
rno-miR-138-5p	Efhd2
rno-miR-138-5p	Efnb3
rno-miR-138-5p	Egflam
rno-miR-138-5p	Ehmt1
rno-miR-138-5p	Eid1
rno-miR-138-5p	Eif1a
rno-miR-138-5p	Eif2s3x
rno-miR-138-5p	Eif4ebp1
rno-miR-138-5p	Eif4ebp2
rno-miR-138-5p	Eif4g2
rno-miR-138-5p	Elavl2
rno-miR-138-5p	Elk3
rno-miR-138-5p	Elk4
rno-miR-138-5p	Elof1
rno-miR-138-5p	Elovl2
rno-miR-138-5p	Elovl3
rno-miR-138-5p	Emb
rno-miR-138-5p	Emp1
rno-miR-138-5p	Enc1
rno-miR-138-5p	Engase
rno-miR-138-5p	Entpd6
rno-miR-138-5p	Ep400
rno-miR-138-5p	Epb4.1
rno-miR-138-5p	Epb4.9
rno-miR-138-5p	Epc2
rno-miR-138-5p	Epdr1
rno-miR-138-5p	Epha4
rno-miR-138-5p	Ephx2
rno-miR-138-5p	Epm2a
rno-miR-138-5p	Eps8
rno-miR-138-5p	Eps8l2
rno-miR-138-5p	Erc1
rno-miR-138-5p	Erf
rno-miR-138-5p	Eri1
rno-miR-138-5p	Esrp2
rno-miR-138-5p	Ethe1
rno-miR-138-5p	Etv5
rno-miR-138-5p	Evc
rno-miR-138-5p	Exd1
rno-miR-138-5p	Exo1
rno-miR-138-5p	Exog
rno-miR-138-5p	Eya3
rno-miR-138-5p	Ezh2
rno-miR-138-5p	F11r
rno-miR-138-5p	F2r
rno-miR-138-5p	F2rl2
rno-miR-138-5p	F3
rno-miR-138-5p	F8
rno-miR-138-5p	Fabp3
rno-miR-138-5p	Fads1
rno-miR-138-5p	Faf1
rno-miR-138-5p	Fam100b
rno-miR-138-5p	Fam105a
rno-miR-138-5p	Fam107b
rno-miR-138-5p	Fam109b
rno-miR-138-5p	Fam116a
rno-miR-138-5p	Fam117b
rno-miR-138-5p	Fam122c
rno-miR-138-5p	Fam124a
rno-miR-138-5p	Fam125a
rno-miR-138-5p	Fam12b
rno-miR-138-5p	Fam134c
rno-miR-138-5p	Fam135a
rno-miR-138-5p	Fam13b1
rno-miR-138-5p	Fam149b1
rno-miR-138-5p	Fam160b2
rno-miR-138-5p	Fam163a
rno-miR-138-5p	Fam168a
rno-miR-138-5p	Fam172a
rno-miR-138-5p	Fam175b
rno-miR-138-5p	Fam176a
rno-miR-138-5p	Fam185a
rno-miR-138-5p	Fam19a5
rno-miR-138-5p	Fam53b
rno-miR-138-5p	Fam55b
rno-miR-138-5p	Fam64a
rno-miR-138-5p	Fam71b
rno-miR-138-5p	Fam96b
rno-miR-138-5p	Fanca
rno-miR-138-5p	Fas
rno-miR-138-5p	Fat2
rno-miR-138-5p	Fat4
rno-miR-138-5p	Fbxl4
rno-miR-138-5p	Fbxl7
rno-miR-138-5p	Fbxo21
rno-miR-138-5p	Fbxo46
rno-miR-138-5p	Fbxw5
rno-miR-138-5p	Fbxw8
rno-miR-138-5p	Fcer1a
rno-miR-138-5p	Fem1c
rno-miR-138-5p	Fermt2
rno-miR-138-5p	Fes
rno-miR-138-5p	Fgd1
rno-miR-138-5p	Fgd3
rno-miR-138-5p	Fibcd1
rno-miR-138-5p	Ficd
rno-miR-138-5p	Fitm2
rno-miR-138-5p	Fkbp5
rno-miR-138-5p	Fkbp9
rno-miR-138-5p	Flrt1
rno-miR-138-5p	Flywch1
rno-miR-138-5p	Fmo2
rno-miR-138-5p	Fmod
rno-miR-138-5p	Fmr1
rno-miR-138-5p	Fndc8
rno-miR-138-5p	Foxc1
rno-miR-138-5p	Foxh1
rno-miR-138-5p	Foxi1
rno-miR-138-5p	Foxn1
rno-miR-138-5p	Foxp4
rno-miR-138-5p	Fpgs
rno-miR-138-5p	Frmd3
rno-miR-138-5p	Frs3
rno-miR-138-5p	Ftsjd2
rno-miR-138-5p	Fut2
rno-miR-138-5p	Fyco1
rno-miR-138-5p	Fzd6
rno-miR-138-5p	G4
rno-miR-138-5p	G6pd
rno-miR-138-5p	G7c
rno-miR-138-5p	Gabbr2
rno-miR-138-5p	Gabrb1
rno-miR-138-5p	Galnt2
rno-miR-138-5p	Galntl1
rno-miR-138-5p	Galntl4
rno-miR-138-5p	Garnl4
rno-miR-138-5p	Gas2l1
rno-miR-138-5p	Gas7
rno-miR-138-5p	Gata1
rno-miR-138-5p	Gatad2a
rno-miR-138-5p	Gatc
rno-miR-138-5p	Gatsl2
rno-miR-138-5p	Gcnt1
rno-miR-138-5p	Gdpd2
rno-miR-138-5p	Gfap
rno-miR-138-5p	Gfpt2
rno-miR-138-5p	Gfra1
rno-miR-138-5p	Gfra2
rno-miR-138-5p	Ggcx
rno-miR-138-5p	Ggps1
rno-miR-138-5p	Gigyf1
rno-miR-138-5p	Gimap7
rno-miR-138-5p	Gins2
rno-miR-138-5p	Git1
rno-miR-138-5p	Giyd2
rno-miR-138-5p	Gja5
rno-miR-138-5p	Gkap1
rno-miR-138-5p	Glce
rno-miR-138-5p	Glg1
rno-miR-138-5p	Glt8d1
rno-miR-138-5p	Glt8d3
rno-miR-138-5p	Gltp
rno-miR-138-5p	Gmfb
rno-miR-138-5p	Gna12
rno-miR-138-5p	Gnai2
rno-miR-138-5p	Gnat1
rno-miR-138-5p	Gng2
rno-miR-138-5p	Gnrhr
rno-miR-138-5p	Golga7
rno-miR-138-5p	Gorasp1
rno-miR-138-5p	Gosr1
rno-miR-138-5p	Gosr2
rno-miR-138-5p	Gpd1
rno-miR-138-5p	Gpihbp1
rno-miR-138-5p	Gpr107
rno-miR-138-5p	Gpr155
rno-miR-138-5p	Gpr172b
rno-miR-138-5p	Gpr183
rno-miR-138-5p	Gpr22
rno-miR-138-5p	Gpr45
rno-miR-138-5p	Gpr6
rno-miR-138-5p	Gpr68
rno-miR-138-5p	Gpx3
rno-miR-138-5p	Gpx6
rno-miR-138-5p	Grap
rno-miR-138-5p	Grb10
rno-miR-138-5p	Grem1
rno-miR-138-5p	Gria3
rno-miR-138-5p	Grina
rno-miR-138-5p	Grip2
rno-miR-138-5p	Grlf1
rno-miR-138-5p	Grm1
rno-miR-138-5p	Grm2
rno-miR-138-5p	Gsk3a
rno-miR-138-5p	Gstt1
rno-miR-138-5p	Gtf3c4
rno-miR-138-5p	Gtlf3b
rno-miR-138-5p	Guf1
rno-miR-138-5p	Gulp1
rno-miR-138-5p	Gyg1
rno-miR-138-5p	Gypc
rno-miR-138-5p	H3f3b
rno-miR-138-5p	H6pd
rno-miR-138-5p	Haao
rno-miR-138-5p	Haghl
rno-miR-138-5p	Has3
rno-miR-138-5p	Haus7
rno-miR-138-5p	Hbegf
rno-miR-138-5p	Hbp1
rno-miR-138-5p	Hcfc1
rno-miR-138-5p	Hddc3
rno-miR-138-5p	Hdgfrp3
rno-miR-138-5p	Heatr2
rno-miR-138-5p	Heatr3
rno-miR-138-5p	Heca
rno-miR-138-5p	Heyl
rno-miR-138-5p	Hibch
rno-miR-138-5p	Hif1a
rno-miR-138-5p	Hif3a
rno-miR-138-5p	Hira
rno-miR-138-5p	Hisppd2a
rno-miR-138-5p	Hist1h4b
rno-miR-138-5p	Hist2h2be
rno-miR-138-5p	Hk1
rno-miR-138-5p	Hmgcl
rno-miR-138-5p	Hmha1
rno-miR-138-5p	Hmx2
rno-miR-138-5p	Hnrnpa3
rno-miR-138-5p	Hnrnph3
rno-miR-138-5p	Hoxb4
rno-miR-138-5p	Hr
rno-miR-138-5p	Hrasls
rno-miR-138-5p	Hs1bp3
rno-miR-138-5p	Hs2st1
rno-miR-138-5p	Hs6st1
rno-miR-138-5p	Hsf2bp
rno-miR-138-5p	Hspa1a
rno-miR-138-5p	Hspa1b
rno-miR-138-5p	Hspa4
rno-miR-138-5p	Hspa4l
rno-miR-138-5p	Hspb1
rno-miR-138-5p	Htr5a
rno-miR-138-5p	Htr5b
rno-miR-138-5p	Icam1
rno-miR-138-5p	Icos
rno-miR-138-5p	Id4
rno-miR-138-5p	Ide
rno-miR-138-5p	Ifitm5
rno-miR-138-5p	Ifnar1
rno-miR-138-5p	Igf2
rno-miR-138-5p	Igf2bp2
rno-miR-138-5p	Igfbp2
rno-miR-138-5p	Igsf11
rno-miR-138-5p	Ikbkb
rno-miR-138-5p	Il13ra1
rno-miR-138-5p	Il17d
rno-miR-138-5p	Il1f5
rno-miR-138-5p	Il6ra
rno-miR-138-5p	Il6st
rno-miR-138-5p	Il9r
rno-miR-138-5p	Ilf3
rno-miR-138-5p	Imp4
rno-miR-138-5p	Impact
rno-miR-138-5p	Ina
rno-miR-138-5p	Ing5
rno-miR-138-5p	Inhbb
rno-miR-138-5p	Inhbc
rno-miR-138-5p	Ino80
rno-miR-138-5p	Ino80c
rno-miR-138-5p	Inpp4a
rno-miR-138-5p	Ints10
rno-miR-138-5p	Ints3
rno-miR-138-5p	Invs
rno-miR-138-5p	Ipmk
rno-miR-138-5p	Iqsec3
rno-miR-138-5p	Irak3
rno-miR-138-5p	Irf6
rno-miR-138-5p	Irgc1
rno-miR-138-5p	Itga10
rno-miR-138-5p	Itga5
rno-miR-138-5p	Itga7
rno-miR-138-5p	Itga9
rno-miR-138-5p	Itgal
rno-miR-138-5p	Itgbl1
rno-miR-138-5p	Itk
rno-miR-138-5p	Itpk1
rno-miR-138-5p	Itpkb
rno-miR-138-5p	Itpkc
rno-miR-138-5p	Itpr2
rno-miR-138-5p	Jazf1
rno-miR-138-5p	Jmjd1c
rno-miR-138-5p	Jmjd8
rno-miR-138-5p	Josd1
rno-miR-138-5p	Jsrp1
rno-miR-138-5p	Kcnc1
rno-miR-138-5p	Kcnd1
rno-miR-138-5p	Kcne1
rno-miR-138-5p	Kcnj6
rno-miR-138-5p	Kcnk15
rno-miR-138-5p	Kcnk3
rno-miR-138-5p	Kcnk5
rno-miR-138-5p	Kcnma1
rno-miR-138-5p	Kcns1
rno-miR-138-5p	Kcnv2
rno-miR-138-5p	Kctd18
rno-miR-138-5p	Kctd2
rno-miR-138-5p	Kdelc2
rno-miR-138-5p	Kdelr1
rno-miR-138-5p	Kdelr2
rno-miR-138-5p	Kdm2a
rno-miR-138-5p	Kdm4a
rno-miR-138-5p	Kdm6b
rno-miR-138-5p	Khdrbs1
rno-miR-138-5p	Kidins220
rno-miR-138-5p	Kif11
rno-miR-138-5p	Kif2c
rno-miR-138-5p	Kif3b
rno-miR-138-5p	Klf10
rno-miR-138-5p	Klf11
rno-miR-138-5p	Klf14
rno-miR-138-5p	Klf7
rno-miR-138-5p	Klhdc5
rno-miR-138-5p	Klhdc8a
rno-miR-138-5p	Klhl12
rno-miR-138-5p	Klhl13
rno-miR-138-5p	Klhl21
rno-miR-138-5p	Klhl22
rno-miR-138-5p	Klhl23
rno-miR-138-5p	Klhl24
rno-miR-138-5p	Klhl25
rno-miR-138-5p	Klhl29
rno-miR-138-5p	Klk14
rno-miR-138-5p	Klkb1
rno-miR-138-5p	Kpna6
rno-miR-138-5p	Kpnb1
rno-miR-138-5p	Krt1
rno-miR-138-5p	Krt19
rno-miR-138-5p	Krtap31-1
rno-miR-138-5p	Kti12
rno-miR-138-5p	Ky
rno-miR-138-5p	L2hgdh
rno-miR-138-5p	L3mbtl2
rno-miR-138-5p	Lamc1
rno-miR-138-5p	Lamc3
rno-miR-138-5p	Laptm5
rno-miR-138-5p	Larp1
rno-miR-138-5p	Larp5
rno-miR-138-5p	Lass1
rno-miR-138-5p	Lass6
rno-miR-138-5p	Lcn10
rno-miR-138-5p	Lcn2
rno-miR-138-5p	Ldlrap1
rno-miR-138-5p	Leng8
rno-miR-138-5p	Lep
rno-miR-138-5p	Letmd1
rno-miR-138-5p	Lfng
rno-miR-138-5p	Lgals8
rno-miR-138-5p	Lgr5
rno-miR-138-5p	Lhx4
rno-miR-138-5p	Lhx5
rno-miR-138-5p	Lhx6
rno-miR-138-5p	Limd1
rno-miR-138-5p	Limk1
rno-miR-138-5p	Lims2
rno-miR-138-5p	Lmbrd2
rno-miR-138-5p	Lmln
rno-miR-138-5p	Lmod1
rno-miR-138-5p	LOC100125367
rno-miR-138-5p	LOC100125368
rno-miR-138-5p	LOC100151767
rno-miR-138-5p	LOC100294508
rno-miR-138-5p	LOC100302465
rno-miR-138-5p	LOC100359539
rno-miR-138-5p	LOC100359823
rno-miR-138-5p	LOC100359980
rno-miR-138-5p	LOC100360066
rno-miR-138-5p	LOC100360200
rno-miR-138-5p	LOC100360241
rno-miR-138-5p	LOC100360406
rno-miR-138-5p	LOC100360552
rno-miR-138-5p	LOC100360606
rno-miR-138-5p	LOC100360621
rno-miR-138-5p	LOC100360707
rno-miR-138-5p	LOC100360837
rno-miR-138-5p	LOC100360936
rno-miR-138-5p	LOC100361122
rno-miR-138-5p	LOC100361188
rno-miR-138-5p	LOC100361306
rno-miR-138-5p	LOC100361376
rno-miR-138-5p	LOC100361475
rno-miR-138-5p	LOC100361515
rno-miR-138-5p	LOC100361517
rno-miR-138-5p	LOC100361700
rno-miR-138-5p	LOC100361774
rno-miR-138-5p	LOC100361788
rno-miR-138-5p	LOC100361830
rno-miR-138-5p	LOC100361939
rno-miR-138-5p	LOC100362065
rno-miR-138-5p	LOC100362464
rno-miR-138-5p	LOC100362471
rno-miR-138-5p	LOC100362846
rno-miR-138-5p	LOC100362990
rno-miR-138-5p	LOC100363074
rno-miR-138-5p	LOC100363194
rno-miR-138-5p	LOC100363283
rno-miR-138-5p	LOC100363708
rno-miR-138-5p	LOC100363714
rno-miR-138-5p	LOC100363777
rno-miR-138-5p	LOC100363808
rno-miR-138-5p	LOC100363922
rno-miR-138-5p	LOC100363985
rno-miR-138-5p	LOC100363988
rno-miR-138-5p	LOC100364026
rno-miR-138-5p	LOC100364162
rno-miR-138-5p	LOC100364523
rno-miR-138-5p	LOC100364559
rno-miR-138-5p	LOC100364587
rno-miR-138-5p	LOC100364681
rno-miR-138-5p	LOC100364699
rno-miR-138-5p	LOC100364718
rno-miR-138-5p	LOC100364813
rno-miR-138-5p	LOC100364826
rno-miR-138-5p	LOC100365088
rno-miR-138-5p	LOC100365424
rno-miR-138-5p	LOC100365503
rno-miR-138-5p	LOC100365546
rno-miR-138-5p	LOC100365556
rno-miR-138-5p	LOC100365566
rno-miR-138-5p	LOC100365697
rno-miR-138-5p	LOC100365772
rno-miR-138-5p	LOC100365874
rno-miR-138-5p	LOC292199
rno-miR-138-5p	LOC294446
rno-miR-138-5p	LOC298018
rno-miR-138-5p	LOC301124
rno-miR-138-5p	LOC303259
rno-miR-138-5p	LOC304000
rno-miR-138-5p	LOC304396
rno-miR-138-5p	LOC304558
rno-miR-138-5p	LOC305633
rno-miR-138-5p	LOC306766
rno-miR-138-5p	LOC309692
rno-miR-138-5p	LOC311578
rno-miR-138-5p	LOC314600
rno-miR-138-5p	LOC314942
rno-miR-138-5p	LOC317471
rno-miR-138-5p	LOC360888
rno-miR-138-5p	LOC361646
rno-miR-138-5p	LOC361990
rno-miR-138-5p	LOC362710
rno-miR-138-5p	LOC365778
rno-miR-138-5p	LOC365985
rno-miR-138-5p	LOC497978
rno-miR-138-5p	LOC498122
rno-miR-138-5p	LOC498154
rno-miR-138-5p	LOC499240
rno-miR-138-5p	LOC499330
rno-miR-138-5p	LOC499331
rno-miR-138-5p	LOC499716
rno-miR-138-5p	LOC499736
rno-miR-138-5p	LOC500077
rno-miR-138-5p	LOC500251
rno-miR-138-5p	LOC500705
rno-miR-138-5p	LOC500893
rno-miR-138-5p	LOC500947
rno-miR-138-5p	LOC500956
rno-miR-138-5p	LOC502684
rno-miR-138-5p	LOC503165
rno-miR-138-5p	LOC641316
rno-miR-138-5p	LOC654482
rno-miR-138-5p	LOC679046
rno-miR-138-5p	LOC679127
rno-miR-138-5p	LOC679651
rno-miR-138-5p	LOC680039
rno-miR-138-5p	LOC680117
rno-miR-138-5p	LOC680319
rno-miR-138-5p	LOC680367
rno-miR-138-5p	LOC680406
rno-miR-138-5p	LOC680663
rno-miR-138-5p	LOC680885
rno-miR-138-5p	LOC681433
rno-miR-138-5p	LOC681694
rno-miR-138-5p	LOC681740
rno-miR-138-5p	LOC681749
rno-miR-138-5p	LOC681858
rno-miR-138-5p	LOC681989
rno-miR-138-5p	LOC682469
rno-miR-138-5p	LOC682920
rno-miR-138-5p	LOC683460
rno-miR-138-5p	LOC683482
rno-miR-138-5p	LOC683626
rno-miR-138-5p	LOC683720
rno-miR-138-5p	LOC683733
rno-miR-138-5p	LOC683844
rno-miR-138-5p	LOC684122
rno-miR-138-5p	LOC684534
rno-miR-138-5p	LOC684871
rno-miR-138-5p	LOC685079
rno-miR-138-5p	LOC685233
rno-miR-138-5p	LOC685398
rno-miR-138-5p	LOC685808
rno-miR-138-5p	LOC686189
rno-miR-138-5p	LOC687022
rno-miR-138-5p	LOC687105
rno-miR-138-5p	LOC687192
rno-miR-138-5p	LOC687237
rno-miR-138-5p	LOC687609
rno-miR-138-5p	LOC687681
rno-miR-138-5p	LOC687813
rno-miR-138-5p	LOC687856
rno-miR-138-5p	LOC688041
rno-miR-138-5p	LOC688211
rno-miR-138-5p	LOC688298
rno-miR-138-5p	LOC688318
rno-miR-138-5p	LOC688495
rno-miR-138-5p	LOC688893
rno-miR-138-5p	LOC688924
rno-miR-138-5p	LOC689081
rno-miR-138-5p	LOC689287
rno-miR-138-5p	LOC689569
rno-miR-138-5p	LOC689574
rno-miR-138-5p	LOC689618
rno-miR-138-5p	LOC689752
rno-miR-138-5p	LOC689809
rno-miR-138-5p	LOC689852
rno-miR-138-5p	LOC689927
rno-miR-138-5p	LOC689933
rno-miR-138-5p	LOC690217
rno-miR-138-5p	LOC690326
rno-miR-138-5p	LOC690492
rno-miR-138-5p	LOC690752
rno-miR-138-5p	LOC690911
rno-miR-138-5p	LOC691141
rno-miR-138-5p	LOC691397
rno-miR-138-5p	LOC691932
rno-miR-138-5p	Lpcat4
rno-miR-138-5p	Lphn1
rno-miR-138-5p	Lpin2
rno-miR-138-5p	Lppr4
rno-miR-138-5p	Lrat
rno-miR-138-5p	Lrch4
rno-miR-138-5p	Lrdd
rno-miR-138-5p	Lrfn1
rno-miR-138-5p	Lrp1b
rno-miR-138-5p	Lrp3
rno-miR-138-5p	Lrp6
rno-miR-138-5p	Lrrc10
rno-miR-138-5p	Lrrc14b
rno-miR-138-5p	Lrrc20
rno-miR-138-5p	Lrrc47
rno-miR-138-5p	Lrrc50
rno-miR-138-5p	Lrsam1
rno-miR-138-5p	Lsm14a
rno-miR-138-5p	Ltbp2
rno-miR-138-5p	Ltbp4
rno-miR-138-5p	Ltbr
rno-miR-138-5p	Luc7l3
rno-miR-138-5p	Luzp1
rno-miR-138-5p	Lypla1
rno-miR-138-5p	Lyrm1
rno-miR-138-5p	Lyve1
rno-miR-138-5p	Lyz2
rno-miR-138-5p	Lztr1
rno-miR-138-5p	Lzts2
rno-miR-138-5p	Macf1
rno-miR-138-5p	Maff
rno-miR-138-5p	Mafg
rno-miR-138-5p	Magi3
rno-miR-138-5p	Mamdc4
rno-miR-138-5p	Maml1
rno-miR-138-5p	Man1b1
rno-miR-138-5p	Man2a1
rno-miR-138-5p	Map1b
rno-miR-138-5p	Map1lc3a
rno-miR-138-5p	Map1lc3b
rno-miR-138-5p	Map3k11
rno-miR-138-5p	Map3k14
rno-miR-138-5p	Map3k3
rno-miR-138-5p	Map3k7
rno-miR-138-5p	Mapk12
rno-miR-138-5p	Mapk6
rno-miR-138-5p	Mapkapk2
rno-miR-138-5p	Mapre3
rno-miR-138-5p	March9
rno-miR-138-5p	Marcks
rno-miR-138-5p	Mare
rno-miR-138-5p	Mavs
rno-miR-138-5p	Mb
rno-miR-138-5p	Mbp
rno-miR-138-5p	Mcoln2
rno-miR-138-5p	Meaf6
rno-miR-138-5p	Mecom
rno-miR-138-5p	Med15
rno-miR-138-5p	Med16
rno-miR-138-5p	Med17
rno-miR-138-5p	Med19
rno-miR-138-5p	Med26
rno-miR-138-5p	Megf9
rno-miR-138-5p	Meis3
rno-miR-138-5p	Melk
rno-miR-138-5p	Men1
rno-miR-138-5p	Mettl7a
rno-miR-138-5p	Mfap4
rno-miR-138-5p	Mfsd6
rno-miR-138-5p	Mfsd7
rno-miR-138-5p	Mgat1
rno-miR-138-5p	Mgat4a
rno-miR-138-5p	Mgat5b
rno-miR-138-5p	MGC108823
rno-miR-138-5p	MGC112715
rno-miR-138-5p	MGC93975
rno-miR-138-5p	Mgrn1
rno-miR-138-5p	Mid2
rno-miR-138-5p	Mier2
rno-miR-138-5p	Mier3
rno-miR-138-5p	Mip
rno-miR-138-5p	Mkl1
rno-miR-138-5p	Mll5
rno-miR-138-5p	Mllt11
rno-miR-138-5p	Mlph
rno-miR-138-5p	Mmaa
rno-miR-138-5p	Mmd
rno-miR-138-5p	Mmel1
rno-miR-138-5p	Mmgt1
rno-miR-138-5p	Mmp11
rno-miR-138-5p	Mmp17
rno-miR-138-5p	Mmp24
rno-miR-138-5p	Mmp7
[truncated: 27,165 more rows]

## Sheet: gene-list
Gene_symbol
A2bp1
A2ld1
A3galt2
Aacs
Aadac
Aak1
Aamp
Aanat
Aard
Aars
Aars2
Aarsd1
Aasdhppt
Aass
Aatf
Aatk
Abca2
Abca3
Abca8a
Abcb10
Abcb11
Abcb1a
Abcb6
Abcb7
Abcb9
Abcc1
Abcc10
Abcc12
Abcc3
Abcc4
Abcc5
Abcc6
Abcc9
Abcd2
Abcd3
Abcd4
Abce1
Abcf2
Abcf3
Abcg1
Abcg4
Abcg8
Abhd10
Abhd12
Abhd13
Abhd14a
Abhd14b
Abhd15
Abhd2
Abhd3
Abhd4
Abhd6
Abi1
Abi2
Abi3
Abl1
Ablim2
Abo2
Abp1
Abp10
Abr
Abra
Abt1
Abtb1
Abtb2
Acaa1
Acaa2
Acad11
Acad9
Acads
Acap2
Acap3
Acat2
Acbd3
Accn1
Accn2
Accn4
Accs
Ace
Acer1
Acer2
Acin1
Acly
Aco1
Aco2
Acot1
Acot13
Acot2
Acot3
Acot4
Acot7
Acp1
Acp2
Acp5
Acpl2
Acsbg2
Acsf2
Acsf3
Acsl1
Acsl4
Acsl5
Acsm2
Acsm4
Acss1
Acss2
Acta1
Acta2
Actbl2
Actg1
Actn4
Actr1a
Actr1b
Actr3
Actr5
Actrt2
Acvr1b
Acvr2a
Acvr2b
Acvrl1
Acy3
Acyp2
Ada
Adam10
Adam11
Adam15
Adam17
Adam19
Adam30
Adam3a
Adam4
Adam4l1
Adam7
Adamdec1
Adamts14
Adamts15
Adamts19
Adamts3
Adamts4
Adamts7
Adamts9
Adamtsl2
Adamtsl3
Adamtsl4
Adap1
Adap2
Adarb1
Adat1
Adat3
Adck1
Adck4
Adcy3
Adcy5
Adcy6
Adcy7
Adcy9
Adcyap1
Adcyap1r1
Add1
Add2
Add3
Adh1
Adh6
Adh6a
Adh7
Adhfe1
Adi1
Adipor1
Adk
Adm
Adnp
Adnp2
Ado
Adora2a
Adora2b
Adora3
Adpgk
Adprh
Adra2b
Adra2c
Adrb2
Adrb3
Adrbk1
Adrbk2
Adsl
Adss
Aebp2
Aen
Aes
Afaf
Afap1
Afap1l1
Afap1l2
Aff1
Aff3
Aff4
Afg3l2
Afmid
Afp
Aga
Agap1
Agap2
Agap3
Agbl2
Ager
Agfg1
Agfg2
Agk
Agl
Agpat1
Agpat2
Agpat3
Agpat5
Agpat6
Agpat9
Agphd1
Agr3
Agrn
Agtpbp1
Agtr1a
Agtr1b
Agtrap
Ahctf1
Ahcyl1
Ahcyl2
Ahdc1
Ahnak
Ahrr
Ahsa2
Ahsg
aicda
Aif1l
Aifm2
Aim1
Aip
Aipl1
Aire
Ajap1
Ak1
Ak2
Ak3
Ak7
Akap10
Akap11
Akap12
Akap13
Akap2
Akap6
Akap8
Akirin1
Akirin2
Akna
Akr1a1
Akr1b10
Akr1c19
Akr1d1
Akt1s1
Akt3
Aktip
Alad
Alas1
Alb
Aldh18a1
Aldh1a1
Aldh1a2
Aldh1a7
Aldh1b1
Aldh1l1
Aldh1l2
Aldh2
Aldh3a2
Aldh3b1
Aldh5a1
Aldh6a1
Aldh9a1
Aldoal1
Aldob
Alg1
Alg10
Alg11
Alg12
Alg13
Alg14
Alg2
Alg6
Alg9
Alk
Alkbh
Alkbh4
Alkbh5
Alkbh8
Alox12
Alox5
Aloxe3
Alpi
Alpl
Als2cl
Als2cr4
Alx1
Amac1
Ambn
Amd1
Amfr
Amigo2
Ammecr1l
Amn1
Amotl2
Ampd2
Ampd3
Amt
Amtn
Amz2
Anapc1
Anapc10
Anapc11
Anapc4
Anapc7
Andpro
Angel1
Angel2
Angpt2
Angpt4
Angptl4
Ank1
Ank2
Ank3
Ankh
Ankib1
Ankk1
Ankmy2
Ankra2
Ankrd1
Ankrd10
Ankrd12
Ankrd13a
Ankrd13c
Ankrd16
Ankrd17
Ankrd2
Ankrd24
Ankrd26
Ankrd28
Ankrd29
Ankrd34a
Ankrd34b
Ankrd34c
Ankrd39
Ankrd40
Ankrd41
Ankrd43
Ankrd46
Ankrd49
Ankrd5
Ankrd50
Ankrd54
Ankrd55
Ankrd57
Ankrd58
Ankrd6
Anks1a
Anks3
Anks4b
Anks6
Ano1
Ano10
Ano3
Ano4
Ano6
Anp32b
Anpep
Antxr1
Anxa1
Anxa10
Anxa13
Anxa2
Anxa4
Anxa5
Anxa6
Anxa9
Aoc3
Aof1
Aox3l1
Aox4
Ap1ar
Ap1b1
Ap1g1
Ap1m1
Ap1s1
Ap1s2
Ap1s3
Ap2a1
Ap2a2
Ap2b1
Ap2m1
Ap2s1
Ap3b1
Ap3d1
Ap3m1
Ap3s1
Ap4b1
Apaf1
Apba1
Apbb1
Apbb2
Apbb3
Apc2
Apeh
Aph1a
Aph1b
Api5
Aplf
Apln
Aplnr
Aplp1
Aplp2
Apob48r
Apobec2
Apol3
Apol9a
Apold1
Apool
Appbp2
Appl2
Aptx
Aqp1
Aqp12b
Aqp2
Aqp3
Aqp4
Aqp6
Aqr
Ar
Arap2
Arc
Arcn1
Ard1a
Ard1b
Arf2
Arf3
Arf4
Arf5
Arfgap1
Arfgap2
Arfgef1
Arfgef2
Arfip2
Arfrp1
Arhgap1
Arhgap10
Arhgap11a
Arhgap12
Arhgap15
Arhgap17
Arhgap21
Arhgap22
Arhgap25
Arhgap28
Arhgap4
Arhgdia
Arhgdib
Arhgef1
Arhgef12
Arhgef15
Arhgef18
Arhgef19
Arhgef2
Arhgef3
Arhgef4
Arhgef5
Arhgef7
Arhgef9
Arid1a
Arid2
Arid3b
Arid4a
Arid4b
Arid5a
Arid5b
Arih1
Arih2
Arl11
Arl13a
Arl13b
Arl15
Arl2
Arl2bp
Arl5b
Arl5c
Arl6
Arl6ip1
Arl6ip4
Arl6ip6
Arl8a
Arl8b
Armc1
Armc10
Armc2
Armc5
Armc7
Armc8
Armc9
Armcx2
Armcx6
Arnt2
Arntl
Arpc2
Arpc3
Arpc4
Arpc5
Arpc5l
Arpp-21
Arrdc1
Arrdc2
Arsb
Art4
Artn
Arv1
Arvcf
As3mt
Asah1
Asam
Asap2
Asb1
Asb10
Asb11
Asb13
Asb14
Asb15
Asb17
Asb2
Asb3
Asb4
Asb5
Asb6
Asb8
Ascc1
Ascc2
Ascc3l1
Ascl1
Ascl2
Asf1a
Asf1b
Ash1l
Ash2l
Asnsd1
Aspa
Aspg
Asphd2
Aspscr1
Astl
Astn1
Asz1
Atad1
Atad2
Atcay
Ate1
Atf1
Atf3
Atf5
Atf6
Atf6b
Atf7
Atf7ip2
Atg10
Atg12
Atg16l2
Atg2a
Atg4b
Atg4c
Atg5
Atg7
Atg9a
Atl2
Atm
Atmin
Atoh1
Atoh8
Atp10a
Atp11a
Atp11b
Atp12a
Atp13a5
Atp1a1
Atp1a2
Atp1a4
Atp1b1
Atp1b2
Atp1b4
Atp2a2
Atp2a3
Atp2b1
Atp2b2
Atp2b3
Atp2b4
Atp2c1
Atp4b
Atp5b
Atp5e
Atp5g3
Atp5s
Atp5sl
Atp6ap1
Atp6ap2
Atp6v0a1
Atp6v0a4
Atp6v0c
Atp6v0e1
Atp6v1a
Atp6v1b1
Atp6v1b2
Atp6v1d
Atp6v1e1
Atp6v1e2
Atp6v1g1
Atp6v1g2
Atp6v1g3
Atp7a
Atp7b
Atp8a1
Atp8b1
Atp8b3
Atp9b
Atpaf1
Atpbd4
Atrn
Atxn1
Atxn10
Atxn2
Atxn3
Atxn7l2
Auh
Aurka
Aven
Avil
Avpi1
Avpr1b
Axin1
Azgp1
Azi1
Azin1
B3galnt1
B3galnt2
B3galt1
B3galt2
B3galt4
B3galt5
B3galt6
B3gat1
B3gat2
B3gnt1
B3gnt2
B3gnt3
B3gnt4
B3gnt5
B3gnt6
B3gnt7
B3gntl1
B4galnt1
B4galt1
B4galt2
B4galt4
B4galt5
B4galt6
B4galt7
B9d1
B9d2
Baalc
Baat
Bach1
Bad
Bag3
Bag4
Bahd1
Bai1
Bai2
Bai3
Baiap2l2
Bak1
Banf1
Banp
Bap1
Bard1
Barx1
Bat2
Batf
Baz1a
Baz1b
Baz2a
Bbc3
Bbs1
Bbs10
Bbs2
Bbs4
Bbs7
Bcam
Bcan
Bcap29
Bcap31
Bcas1
Bcas2
Bcas3
Bcat1
Bcat2
Bccip
Bcdin3d
Bckdha
Bckdk
Bcl10
Bcl11a
Bcl2
Bcl2l1
Bcl2l10
Bcl2l13
Bcl2l2
Bcl6b
Bcl7b
Bcl9
Bcl9l
Bclaf1
Bcmo1
Bco2
Bcor
Bcorl1
Bdh1
Bdkrb2
Bdnf
Bean
Becn1
Begain
Bend5
Bend6
Best2
Best3
Bet1
Bet1l
Bex2
Bex4
Bfar
Bgn
Bhlha15
Bhlhb9
Bhlhe22
Bhlhe23
Bhlhe40
Bhlhe41
Bhmt
Bhmt2
Bicc1
Bicd1
Bicd2
Bin1
Bin2
Bin2a
Bin3
Birc5
Birc6
Birc7
Blcap
Bles03
Blk
Blmh
Blnk
Bloc1s2
Bloc1s3
Bmf
Bmp1
Bmp5
Bmp7
Bmp8a
Bmper
Bmpr1a
Bmpr1b
Bmpr2
Bms1
Bmx
Bnc1
Bnc2
Bnip1
Bnip2
Bnip3
Bnip3l
Bnipl
Bod1
Bok
Bola3
Bpgm
Bphl
Bpnt1
Brcc3
Brd1
Brd2
Brd3
Brd4
Brd8
Brd9
Bre
Bri3bp
Brip1
Brms1
Brms1l
Brp16
Brpf1
Brpf3
Brsk1
Brsk2
Brunol4
Brunol5
Brwd2
Brwd3
Bscl2
Bsdc1
Bsg
Bsn
Bsnd
Bspry
Btaf1
Btbd1
Btbd10
Btbd12
Btbd17
Btbd2
Btbd3
Btbd4
Btbd6
Btbd7
Btf3
Btf3l4
Btg1
Btg2
Btg3
Btg4
Btnl1
Btnl5
Btnl7
Btrc
Bub1
Bub3
Bud13
Bud31
Bwk1
Bxdc1
Bxdc2
Bzw1
C1d
C1galt1
C1galt1c1
C1H6orf35
C1qc
C1ql3
C1qtnf3
C1qtnf4
C1qtnf6
C1qtnf7
C1qtnf9
C1r
C1s
C20orf165
C2cd2
C2cd2l
C2cd3
C3
C6
C7
C8a
C8b
C8g
C9
Cab39
Cabc1
Cabin1
Cables1
Cables2
Cabp1
Cabp2
Cabp5
Cabp7
Cachd1
Cacna1a
Cacna1b
Cacna1c
Cacna1d
Cacna1g
Cacna1h
Cacna1s
Cacna2d1
Cacnb1
Cacnb2
Cacnb4
Cacybp
Cad
Cadm1
Cadps2
Calb1
Calb2
Calca
Calcb
Calcr
Cald1
Calhm2
Calm1
Calm2
Calm4
Calml3
Calml4
Calu
Caly
Camk1
Camk1g
Camk2b
Camkk1
Camkk2
Camkv
Camlg
Camsap1
Camsap1l1
Camta2
Cand1
Cand2
Cant1
Canx
Cap1
Capn1
Capn10
Capn11
Capn12
Capn13
Capn2
Capn3
Capn5
Capn6
Capn7
Capn8
Capn9
Capns1
Caprin1
Caps2
Capza1
Capza2
Capza3
Car11
Car13
Car2
Car5a
Car5b
Car6
Car7
Car8
Car9
Card11
Card6
Carhsp1
Carkd
Carm1
Cars
Casc1
Casc4
Casc5
Cask
Caskin1
Casp2
Casp3
Casp7
Casp8
Casp8ap2
Casp9
Casq1
Casq2
Casr
Cast
Cat
Catsper3
Catsperg1
Cav1
Cav2
Cav3
Cbara1
Cbfa2t2
Cbfa2t3
Cbfb
Cbl
Cblb
Cbll1
Cbln1
Cbln2
Cbln3
Cbln4
Cbr3
Cbs
Cbx1
Cbx2
Cbx3
Cbx6
Cbx7
Cbx8
Cc2d1b
Ccbp2
Ccdc101
Ccdc102a
Ccdc106
Ccdc110
Ccdc112
Ccdc113
Ccdc114
Ccdc117
Ccdc12
Ccdc123
Ccdc124
Ccdc125
Ccdc126
Ccdc127
Ccdc130
Ccdc132
Ccdc134
Ccdc135
Ccdc148
Ccdc158
Ccdc163
Ccdc19
Ccdc21
Ccdc25
Ccdc27
Ccdc32
Ccdc33
Ccdc34
Ccdc39
Ccdc40
Ccdc41
Ccdc42
Ccdc43
Ccdc47
Ccdc49
Ccdc51
Ccdc52
Ccdc53
Ccdc56
Ccdc58
Ccdc60
Ccdc62
Ccdc64
Ccdc67
Ccdc68
Ccdc69
Ccdc71
Ccdc72
Ccdc75
Ccdc77
Ccdc8
Ccdc80
Ccdc81
Ccdc82
Ccdc88a
Ccdc88b
Ccdc91
Ccdc92
Ccdc93
Ccdc94
Ccdc96
Ccdc97
Cckbr
Ccl1
Ccl11
Ccl19
Ccl21b
Ccl22
Ccl24
Ccl25
Ccl26
Ccl27
Ccl28
Ccl3
Ccl5
Ccl9
Ccna1
Ccnb1ip1
Ccnc
Ccnd1
Ccnd3
Ccndbp1
Ccne1
Ccne2
Ccnf
Ccng1
Ccng2
Ccnh
Ccni
Ccnj
Ccnjl
Ccnk
Ccnl2
Ccno
Ccnt2
Ccny
Ccnyl1
Ccpg1
Ccr5
Ccr9
Ccrk
Ccrl2
Ccrn4l
Cct2
Cct3
Cct5
Cct7
Cct8
Cd151
Cd163
Cd164
Cd177
Cd19
Cd1d1
Cd200
Cd209a
Cd209g
Cd226
Cd24
Cd247
Cd248
Cd27
Cd276
Cd28
Cd2ap
Cd2bp2
Cd300lf
Cd300lg
Cd36
Cd38
Cd3e
Cd3eap
Cd4
Cd40
Cd44
Cd47
Cd48
Cd5
Cd53
Cd55
Cd59
Cd5l
Cd6
Cd69
Cd72
Cd74
Cd79b
Cd82
Cd83
Cd93
Cd99l2
Cdadc1
Cdan1
Cdc123
Cdc14a
Cdc14b
Cdc20
Cdc23
Cdc25a
Cdc25b
Cdc26
Cdc2l5
Cdc2l6
Cdc37
Cdc37l1
Cdc40
Cdc42
Cdc42bpa
Cdc42bpb
Cdc42bpg
Cdc42ep1
Cdc42ep2
Cdc42ep3
Cdc42ep4
Cdc42se1
Cdc42se2
Cdc45l
Cdc6
Cdc7
Cdca2
Cdca4
Cdca7
Cdca7l
Cdca8
Cdcp1
Cdgap
Cdh1
Cdh10
Cdh11
Cdh13
Cdh15
Cdh17
Cdh2
Cdh22
Cdh23
Cdh3
Cdh6
Cdh9
Cdig2
Cdipt
Cdk10
Cdk2
Cdk2ap1
Cdk2ap2
Cdk5
Cdk5r2
Cdk5rap3
Cdk6
Cdk7
Cdk9
Cdkl1
Cdkl3
Cdkn1a
Cdkn1b
Cdkn1c
Cdkn2aip
Cdkn2aipnl
Cdkn2b
Cdkn2d
Cdo1
Cdon
Cdr2
Cds1
Cds2
Cdt1
Cdx2
Cdx4
Cdyl
Cdyl2
Ceacam1
Ceacam6
Cebpb
Cebpg
Cebpz
Cecr5
Cel
Celsr1
Celsr2
Celsr3
Cend1
Cenpa
Cenpb
Cenpc1
Cenpe
Cenpf
Cenpi
Cenpm
Cenpq
Centd2
Cep120
Cep164
Cep250
Cep350
Cep55
Cep57
Cep72
Cerk
Ces2
Ces5
Ces7
Ces8
Cetn2
Cetn4
Cfc1
Cfi
Cfl1
Cfl2
Cflar
Cftr
Cggbp1
Cgm4
Cgnl1
Cgref1
Cgrrf1
Chac1
Chac2
Chaf1a
Chat
Chchd10
Chchd3
Chchd4
Chchd8
Chd3
Chd6
Chd8
Chdh
Chek1
Cherp
Chfr
Chga
Chi3l1
Chic2
Chka
Chkb
Chm
Chmp1a
Chmp1b
Chmp2b
Chmp4b
Chmp4c
Chmp5
Chmp6
Chmp7
Chn1
Chodl
Chordc1
Chp
Chpf
Chpt1
Chrac1
Chrd
Chrdl1
Chrm2
Chrm3
Chrm4
Chrm5
Chrna10
Chrna5
Chrna9
Chrnb1
Chrnb2
Chrnb3
Chrng
Chst1
Chst10
Chst12
Chst14
Chst2
Chst4
Chst5
Chst7
Chst8
Chst9
Chsy1
Chtf18
Chtf8
Chuk
Ciapin1
Cib1
Cib2
Cic
Cideb
Cidec
Ciita
Cilp
Cinp
Cisd1
Cisd2
Cish
Cited2
Ciz1
Ckap2
Ckap4
Ckap5
Cks1b
Clasp1
Clasp2
Clca2
Clca3
Clca5
Clcc1
Clcf1
Clcn1
Clcn3
Clcn4-2
Clcn6
Clcn7
Cldn1
Cldn11
Cldn12
Cldn14
Cldn15
Cldn16
Cldn17
Cldn18
Cldn19
Cldn2
Cldn22
Cldn4
Cldn5
Cldn6
Cldn8
Cldn9
Cldnd1
Clec10a
Clec11a
Clec12a
Clec12b
Clec14a
Clec16a
Clec1a
Clec2l
Clec5a
Clec7a
Clec9a
Clic2
Clic3
Clic5
Clip1
Clip2
Clk2
Clk3
Clmn
Cln3
Cln5
Cln6
Cln8
Clns1a
Clp1
Clptm1
Clrn3
Clspn
Clstn1
Clta
Cltc
Cma1
Cmas
Cmbl
Cmklr1
Cml1
Cmpk1
Cmpk2
Cmtm1
Cmtm3
Cmtm4
Cmtm5
Cmtm7
Cmtm8
Cmya5
Cnbp
Cndp1
Cndp2
Cnfn
Cnga1
Cnga2
Cnga3
Cnga4
Cnih
Cnih2
Cnih4
Cnksr1
Cnksr2
Cnksr3
Cnn1
Cnn3
Cnnm1
Cnnm2
Cnnm3
Cnnm4
Cno
Cnot1
Cnot10
Cnot2
Cnot3
Cnot4
Cnot6
Cnot6l
Cnot7
Cnot8
Cnp
Cnpy2
Cnpy3
Cnpy4
Cnr1
Cnr2
Cnrip1
Cntf
Cntfr
Cntn2
Cntn6
Cntnap1
Cntnap4
Cobl
Cobra1
Coch
Cog3
Cog4
Cog6
Cog7
Coil
Col10a1
Col11a1
Col11a2
Col12a1
Col13a1
Col14a1
Col15a1
Col16a1
Col17a1
Col18a1
Col1a1
Col1a2
Col22a1
Col23a1
Col24a1
Col2a1
Col3a1
Col4a1
Col4a2
Col4a3bp
Col4a4
Col4a5
Col5a2
Col6a1
Col6a3
Col7a1
Col8a2
Col9a1
Col9a2
Col9a3
Colec10
Colec11
Colec12
Colq
Commd10
Commd2
Commd3
Commd5
Commd7
Commd8
Comt
Comtd1
Copa
Copb1
Cope
Cops2
Cops4
Cops7a
Cops7b
Cops8
Copz1
Copz2
Coq10a
Coq10b
Coq4
Coq5
Coq6
Coq7
Coq9
Coro1b
Coro1c
Coro2b
Coro6
Coro7
Cort
Cotl1
Cox11
Cox15
Cox16
Cox19
Cox4i1
Cox5b
Cox8a
Cp
Cp110
Cpa4
Cpa5
Cpd
Cpeb1
Cpeb3
Cpeb4
Cpg1
Cplx1
Cplx2
Cplx3
Cpm
Cpn2
Cpne3
Cpne4
Cpne5
Cpne6
Cpne7
Cpne8
Cpox
Cpped1
Cpsf1
Cpsf2
Cpsf4
Cpsf6
Cpsf7
Cpt1a
Cpt1b
Cpxm2
Cpz
Cr1l
Crabp2
Crat
Crb3
Crbn
Crcp
Crct1
Creb3
Creb3l1
Creb3l2
Creb3l3
Crebbp
Crebl2
Creg1
Creld1
Crem
Crh
Crhbp
Crip
Crip2
Crip3
Cript
Crisp1
Crisp4
Crispld1
Crispld2
Crkl
Crkrs
Crlf1
Crlf3
Crls1
Crmp1
Crnkl1
Crtac1
Crtam
Crtc3
Cryaa
Cryba2
Crygs
Crym
Cryz
Cryzl1
Csad
Csda
Csdc2
Csde1
Cse1l
Csf1
Csf1r
Csf2rb
Csgalnact2
Csmd1
Csn1s1
Csn1s2b
Csn2
Csn3
Csnk1d
Csnk1g1
Csnk1g2
Csnk1g3
Csnk2a2
Cspg4
Cspp1
Csrnp1
Csrnp2
Csrp1
Csrp2bp
Cst6
Cst9l
Cstf1
Cstf2
Cstf2t
Cstf3
Ctag2
Ctbp2
Ctcf
Ctdp1
Ctdsp1
Ctdspl
Ctf1
Ctgf
Cth
Cthrc1
Ctla2a
Ctnna1
Ctnna2
Ctnnal1
Ctnnbip1
Ctnnd1
Ctnnd2
Ctns
Ctps
Ctr9
Cts7
Ctsa
Ctsb
Ctsd
Ctsf
Ctsh
Ctsj
Ctsk
Ctsl1
Ctsm
Ctsr
Ctss
Cttn
Cttnbp2
Cttnbp2nl
Ctxn1
Ctxn2
Cubn
Cuedc1
Cul1
Cul2
Cul3
Cul4a
Cul4b
Cul5
Cutc
Cux1
Cuzd1
Cwc22
Cwf19l2
Cx3cl1
Cxadr
Cxadrl1
Cxcl1
Cxcl11
Cxcl12
Cxcl13
Cxcl14
Cxcl16
Cxcl17
Cxcl2
Cxcl3
Cxcr3
Cxcr4
Cxxc1
Cxxc5
Cyb561
Cyb561d1
Cyb561d2
Cyb5a
Cyb5b
Cyb5d2
Cyb5r1
Cyb5r2
Cyb5r3
Cyb5r4
Cybasc3
Cybrd1
Cyc1
Cycs
Cyfip1
Cyfip2
Cygb
Cyhr1
Cyp11b1
Cyp11b2
Cyp19a1
Cyp1a1
Cyp1b1
Cyp21a1
Cyp26a1
Cyp26b1
Cyp27b1
Cyp2a1
Cyp2a2
Cyp2b1
Cyp2b12
Cyp2b2
Cyp2b21
Cyp2b3
Cyp2c11
Cyp2c13
Cyp2d3
Cyp2f4
Cyp2j4
Cyp2r1
Cyp2s1
Cyp2t1
Cyp2u1
Cyp39a1
Cyp3a18
Cyp3a62
Cyp3a9
Cyp4a1
Cyp4a10
Cyp4a2
Cyp4a3
Cyp4a8
Cyp4f17
Cyp4f18
Cyp4f37
Cyp4f5
Cyp4v3
Cyp51
Cyp7a1
Cyp7b1
Cyp8b1
Cys1
Cyth1
Cyth3
Cyth4
Cytip
Cytl1
Cytsa
Cyyr1
Daam1
Dab2ip
Dact2
Dact3
Dad1
Dag1
Dagla
Daglb
Dak
Dao
Dap
Dap3
Dapk1
Dapk2
Dapl1
Dapp1
Dazap2
Dazl
Dbh
Dbn1
Dbndd1
Dbndd2
Dbt
Dbx2
Dcaf10
Dcaf11
Dcaf12l1
Dcaf15
Dcaf4
Dcaf5
Dcaf8
Dcakd
Dcbld1
Dcdc2
Dchs1
Dck
Dclk1
Dclk2
Dclk3
Dclre1b
Dcp2
Dcps
Dctd
Dctn1
Dctn2
Dctn3
Dctn5
Dctn6
Dcun1d1
Dcun1d2
Dcun1d4
Dcx
Dda1
Ddah1
Ddb1
Ddc
Ddef2
Ddhd1
Ddhd2
Ddi1
Ddi2
Ddit4
Ddn
Ddr2
Ddt
Ddx10
Ddx17
Ddx19a
Ddx19b
Ddx21
Ddx23
Ddx28
Ddx39
Ddx3x
Ddx3y
Ddx4
Ddx41
Ddx42
Ddx49
Ddx5
Ddx52
Ddx54
Ddx56
Ddx58
Ddx59
Ddx60
Deaf1
Decr1
Def8
Defb33
Defb36
Defb51
Degs1
Dek
Dem1
Dennd1a
Dennd1b
Dennd2a
Dennd2c
Dennd2d
Dennd3
Dennd4b
Dennd5a
Depdc1b
Depdc2
Depdc5
Derl1
Des
Dexi
Dffa
Dfna5
Dgat2
Dgat2l6
Dgcr6
Dgcr8
Dgkb
Dgkg
Dgkz
Dhdpsl
Dhfr
Dhh
Dhps
Dhrs11
Dhrs3
Dhrs7
Dhrsx
Dhtkd1
Dhx15
Dhx35
Dhx36
Dhx38
Dhx40
Dhx57
Dhx58
Diablo
Diaph3
Dicer1
Dio1
Dio2
Dio3
Dip2a
Dip2b
Dip2c
Diras1
Diras2
Dis3
Disp2
Dixdc1
Dkk1
Dkk2
Dkk3
Dlc1
Dld
Dleu7
Dlg3
Dlg4
Dlgap1
Dlgap2
Dlgap5
Dlk2
Dll1
Dll3
Dll4
Dlst
Dlx1
Dlx3
Dlx4
Dlx5
Dmbx1
Dmd
Dmkn
Dmp1
Dmrt1
Dmrta1
Dmrta2
Dmrtc1c
Dmrtc2
Dmtf1
Dmwd
Dnah1
Dnah17
Dnah5
Dnah7
Dnai2
Dnaja1
Dnaja2
Dnaja3
Dnajb1
Dnajb11
Dnajb12
Dnajb13
Dnajb14
Dnajb5
Dnajb6
Dnajb9
Dnajc10
Dnajc12
Dnajc21
Dnajc27
Dnajc5g
Dnajc6
Dnajc8
Dnajc9
Dnal4
Dnali1
Dnase1
Dnase1l2
Dnase1l3
Dnase2b
Dnd1
Dner
Dnlz
[truncated: 8,522 more rows]
