# Supplementary material for: Integrative microRNA-gene expression network analysis in genetic hypercalciuric stone-forming rat kidney
Source: PeerJ. 2016 Mar 31;4:e1884. doi: 10.7717/peerj.1884 (PMC4824905; doi:10.7717/peerj.1884)
Supplement: Table S7 — Information on differential GO terms (enrichment and −LogP). [file peerj-04-1884-s007.xls]

## Sheet: GO-Enrichment
go_name	enrichment
positive regulation of T-helper 17 cell lineage commitment	90.0421
negative regulation of hydrogen peroxide catabolic process	90.0421
positive regulation of leukocyte apoptotic process	90.0421
regulation of protein ubiquitination involved in ubiquitin-dependent protein catabolic process	90.0421
cellular response to toxic substance	90.0421
mitochondrial respiratory chain complex I biogenesis	90.0421
cellular organofluorine metabolic process	90.0421
negative regulation of secretion of lysosomal enzymes	90.0421
negative regulation of chemokine secretion	90.0421
chemokine secretion	90.0421
interleukin-10 secretion	90.0421
regulation of cellular ketone metabolic process by positive regulation of transcription from RNA polymerase II promoter	90.0421
regulation of glycolysis by positive regulation of transcription from RNA polymerase II promoter	90.0421
vitamin A import	90.0421
regulation of hair follicle cell proliferation	90.0421
cellular response to gravity	90.0421
positive regulation of neutrophil mediated killing of gram-negative bacterium	90.0421
divalent metal ion export	90.0421
leukocyte proliferation	90.0421
vitamin D receptor signaling pathway	90.0421
peptidyl-serine dephosphorylation	90.0421
T cell apoptotic process	90.0421
glucagon secretion	90.0421
connective tissue development	90.0421
regulation of transcription from RNA polymerase II promoter in response to hypoxia	90.0421
negative regulation of dermatome development	90.0421
alveolar primary septum development	90.0421
ciliary body morphogenesis	90.0421
negative regulation of vascular wound healing	90.0421
epithelial cell maturation involved in salivary gland development	90.0421
inhibition of mitotic anaphase-promoting complex activity	90.0421
regulation of calcidiol 1-monooxygenase activity	90.0421
negative regulation of penile erection	90.0421
negative regulation of adenosine receptor signaling pathway	90.0421
milk ejection	90.0421
serotonin secretion, neurotransmission	90.0421
negative regulation of amino acid transport	90.0421
negative regulation of elastin biosynthetic process	90.0421
negative regulation of ubiquitin-protein ligase activity involved in mitotic cell cycle	90.0421
negative regulation of DNA metabolic process	90.0421
negative regulation of muscle organ development	90.0421
negative regulation of hepatocyte growth factor biosynthetic process	90.0421
glycerol biosynthetic process from pyruvate	90.0421
nitric oxide catabolic process	90.0421
acetaldehyde biosynthetic process	90.0421
xanthine biosynthetic process	90.0421
dATP catabolic process	90.0421
positive regulation of striated muscle tissue development	90.0421
MHC class II biosynthetic process	90.0421
FasL biosynthetic process	90.0421
negative regulation of interleukin-12 biosynthetic process	90.0421
fibroblast apoptotic process	90.0421
multicellular organismal protein catabolic process	90.0421
nitrate catabolic process	90.0421
nose morphogenesis	90.0421
molybdopterin cofactor metabolic process	90.0421
positive regulation of eosinophil degranulation	90.0421
telomere maintenance in response to DNA damage	90.0421
L-arginine import	90.0421
vascular endothelial growth factor receptor-2 signaling pathway	90.0421
chemokine (C-C motif) ligand 2 secretion	90.0421
positive regulation of leukotriene production involved in inflammatory response	90.0421
negative regulation of toll-like receptor 3 signaling pathway	90.0421
L-lysine catabolic process to acetyl-CoA via L-pipecolate	90.0421
regulation of inositol trisphosphate biosynthetic process	90.0421
negative regulation of chemokine production	90.0421
interleukin-3 production	90.0421
intracellular sterol transport	90.0421
purine nucleotide salvage	90.0421
regulation of actin filament length	90.0421
regulation of cGMP biosynthetic process	90.0421
BMP signaling pathway involved in spinal cord dorsal/ventral patterning	90.0421
cell motility involved in cerebral cortex radial glia guided migration	90.0421
L-lysine catabolic process	90.0421
arsonoacetate metabolic process	90.0421
peptidyl-glutamic acid carboxylation	90.0421
molecular hydrogen transport	90.0421
creatine transport	90.0421
nitrite transport	90.0421
regulation of macrophage chemotaxis	90.0421
regulation of cGMP-mediated signaling	90.0421
vascular transport	90.0421
nucleoside diphosphate catabolic process	90.0421
spindle assembly involved in female meiosis I	90.0421
cellular cadmium ion homeostasis	90.0421
dicarboxylic acid transport	90.0421
deoxyadenosine catabolic process	90.0421
acetaldehyde metabolic process	90.0421
growth plate cartilage chondrocyte differentiation	90.0421
activation of plasma proteins involved in acute inflammatory response	90.0421
T cell antigen processing and presentation	90.0421
immunoglobulin transcytosis in epithelial cells mediated by polymeric immunoglobulin receptor	90.0421
hepatic immune response	90.0421
germinal center B cell differentiation	90.0421
initiation of primordial ovarian follicle growth	90.0421
positive regulation of histone H3-K36 methylation	90.0421
regulation of transcription involved in G2/M-phase of mitotic cell cycle	90.0421
regulation of transcription involved in S phase of mitotic cell cycle	90.0421
response to cobalamin	90.0421
nuclear membrane organization	60.0281
nucleotide-binding oligomerization domain containing 2 signaling pathway	45.021
ketone body biosynthetic process	45.021
viral entry into host cell	45.021
transformation of host cell by virus	45.021
negative regulation of sequestering of triglyceride	45.021
negative regulation of cholesterol storage	45.021
purine ribonucleoside monophosphate biosynthetic process	45.021
internal protein amino acid acetylation	45.021
positive regulation of glomerular filtration	45.021
myeloid progenitor cell differentiation	45.021
epithelial cell maturation	45.021
response to fluid shear stress	45.021
adhesion to symbiont	36.0168
positive regulation of keratinocyte migration	36.0168
positive regulation of toll-like receptor 4 signaling pathway	36.0168
membrane to membrane docking	36.0168
branched-chain amino acid catabolic process	36.0168
glycosaminoglycan catabolic process	36.0168
negative regulation of mature B cell apoptotic process	36.0168
negative regulation of cytokine production	36.0168
regulation of protein ubiquitination	36.0168
blood vessel endothelial cell migration	33.7658
chronic inflammatory response	32.7426
positive regulation of interleukin-6 secretion	30.014
positive regulation of interleukin-8 secretion	30.014
multicellular organismal iron ion homeostasis	30.014
negative regulation of stress fiber assembly	30.014
negative regulation of oxidoreductase activity	30.014
cellular lipid metabolic process	30.014
tetrahydrofolate interconversion	30.014
bleb assembly	30.014
activation of transmembrane receptor protein tyrosine kinase activity	30.014
glycosphingolipid metabolic process	30.014
negative regulation of epidermal growth factor receptor signaling pathway	30.014
acute inflammatory response	26.483
enamel mineralization	25.7263
chorio-allantoic fusion	25.7263
lung vasculature development	25.7263
positive regulation of heart contraction	25.7263
positive regulation of interleukin-12 biosynthetic process	25.7263
regulation of protein complex assembly	25.7263
positive regulation of T cell differentiation in thymus	25.7263
response to temperature stimulus	25.7263
methionine biosynthetic process	25.7263
activation-induced cell death of T cells	25.7263
ethanol catabolic process	25.7263
complement activation, lectin pathway	25.7263
embryonic digestive tract development	25.7263
oxaloacetate metabolic process	24.5569
positive regulation of synapse maturation	22.5105
diaphragm development	22.5105
negative regulation of cardiac muscle cell proliferation	22.5105
negative regulation of immune response	22.5105
tetrahydrofolate metabolic process	22.5105
negative regulation of meiosis	22.5105
respiratory burst	22.5105
purinergic nucleotide receptor signaling pathway	22.5105
regulation of TOR signaling cascade	22.5105
positive regulation of cyclin-dependent protein serine/threonine kinase activity involved in G1/S transition of mitotic cell cycle	22.5105
negative regulation of macrophage derived foam cell differentiation	22.5105
defense response to Gram-negative bacterium	22.5105
heterophilic cell-cell adhesion	21.6101
cellular response to peptide	20.7789
skeletal muscle tissue regeneration	20.7789
regulation of I-kappaB kinase/NF-kappaB cascade	20.7789
leukocyte tethering or rolling	20.0094
tissue remodeling	20.0094
behavioral response to ethanol	20.0094
positive regulation of superoxide anion generation	20.0094
response to muramyl dipeptide	20.0094
cellular response to nutrient levels	20.0094
positive regulation of pseudopodium assembly	20.0094
negative regulation of cardiac muscle cell apoptotic process	20.0094
toxin metabolic process	20.0094
germ cell migration	20.0094
cardiac left ventricle morphogenesis	20.0094
response to molecule of bacterial origin	20.0094
activation of phospholipase C activity	19.2947
oocyte maturation	19.2947
response to bacterium	19.0998
cellular response to extracellular stimulus	18.9562
hematopoietic stem cell proliferation	18.0084
stress fiber assembly	18.0084
positive regulation of catenin import into nucleus	18.0084
calcium-dependent cell-cell adhesion	18.0084
diterpenoid metabolic process	18.0084
triglyceride homeostasis	18.0084
gluconeogenesis	17.1509
response to reactive oxygen species	17.1509
retinoic acid metabolic process	16.8829
cellular amino acid metabolic process	16.8829
cellular response to interleukin-1	16.8829
cellular protein catabolic process	16.3713
negative regulation of JUN kinase activity	16.3713
regulation of circadian rhythm	16.3713
cerebellar Purkinje cell layer development	16.3713
positive regulation of cholesterol efflux	16.3713
positive regulation of triglyceride biosynthetic process	16.3713
negative regulation of epithelial to mesenchymal transition	16.3713
salivary gland morphogenesis	16.3713
positive regulation of T-helper 1 type immune response	16.3713
focal adhesion assembly	15.8898
leukocyte cell-cell adhesion	15.6595
heart contraction	15.007
positive regulation of positive chemotaxis	15.007
oocyte development	15.007
regulation of mRNA stability	15.007
positive regulation of histone acetylation	15.007
response to glucagon stimulus	15.007
positive regulation of cellular protein metabolic process	15.007
DNA damage response, signal transduction by p53 class mediator	15.007
cellular zinc ion homeostasis	15.007
endothelial cell proliferation	15.007
digestive tract morphogenesis	15.007
negative regulation of myeloid cell differentiation	15.007
negative regulation of neuron death	14.2172
cell-cell junction organization	14.2172
insulin receptor signaling pathway	14.0065
regulation of glucose metabolic process	13.8526
response to gravity	13.8526
cAMP catabolic process	13.8526
neutrophil chemotaxis	13.6427
positive regulation of vasodilation	13.3396
cellular response to tumor necrosis factor	13.3396
placenta development	13.1769
zinc ion transmembrane transport	12.8632
chaperone mediated protein folding requiring cofactor	12.8632
positive regulation of nitric-oxide synthase activity	12.8632
negative regulation of peptidyl-tyrosine phosphorylation	12.8632
negative regulation of cytokine secretion	12.8632
skeletal muscle fiber development	12.8632
collagen catabolic process	12.8632
positive regulation of calcium ion transport into cytosol	12.8632
negative regulation of viral genome replication	12.8632
regulation of mitotic cell cycle	12.8632
response to hydrogen peroxide	12.4674
negative regulation of protein catabolic process	12.2785
epidermal growth factor receptor signaling pathway	12.2785
positive regulation of T cell differentiation	12.0056
negative regulation of MAPK cascade	12.0056
signal transduction by phosphorylation	12.0056
protein N-linked glycosylation	12.0056
positive regulation of leukocyte migration	12.0056
inflammatory response to antigenic stimulus	12.0056
membrane depolarization	11.7446
leukocyte migration	11.7446
response to amino acid stimulus	11.7446
response to progesterone stimulus	11.7446
cellular response to glucocorticoid stimulus	11.6183
response to hyperoxia	11.6183
response to fatty acid	11.2553
intracellular receptor signaling pathway	11.2553
I-kappaB kinase/NF-kappaB cascade	11.2553
embryonic placenta development	10.8051
positive regulation of cell growth	10.7513
skeletal system morphogenesis	10.7193
cell death	10.7193
reactive oxygen species metabolic process	10.3895
lipoprotein metabolic process	10.3895
one-carbon metabolic process	10.3895
glucose transport	10.0047
cell morphogenesis	9.84835
cellular response to drug	9.78718
positive regulation of nitric oxide biosynthetic process	9.64737
intrinsic apoptotic signaling pathway in response to DNA damage by p53 class mediator	9.64737
T cell activation	9.64737
protein oligomerization	9.57895
response to cytokine stimulus	9.47811
regulation of cell growth	9.37938
cellular response to hydrogen peroxide	9.23509
glucose homeostasis	9.11819
positive regulation of cell cycle	9.00421
regulation of neuron apoptotic process	9.00421
lung alveolus development	8.78459
cell growth	8.78459
face morphogenesis	8.71375
activation of MAPKK activity	8.71375
neuron projection morphogenesis	8.65789
liver development	8.61272
response to antibiotic	8.57544
cellular response to insulin stimulus	8.57544
negative regulation of inflammatory response	8.49454
fat cell differentiation	8.49454
response to mechanical stimulus	8.47455
regulation of cell shape	8.47455
response to electrical stimulus	8.44145
tissue regeneration	8.44145
Rho protein signal transduction	8.44145
neuron development	8.37601
cellular response to lipopolysaccharide	8.35442
positive regulation of protein kinase B signaling cascade	8.31158
negative regulation of cysteine-type endopeptidase activity involved in apoptotic process	8.31158
response to calcium ion	8.29335
positive regulation of vasoconstriction	8.18564
synapse assembly	8.18564
iron ion transport	8.18564
glutathione metabolic process	8.18564
response to nicotine	8.18564
response to lipopolysaccharide	8.10805
inflammatory response	8.09902
negative regulation of MAP kinase activity	7.94489
response to starvation	7.94489
regulation of cell adhesion	7.94489
response to nutrient	7.9237
positive regulation of T cell proliferation	7.82975
innate immune response	7.74556
protein targeting	7.71789
response to amphetamine	7.71789
embryo implantation	7.50351
patterning of blood vessels	7.50351
negative regulation of epithelial cell proliferation	7.50351
defense response to virus	7.50351
positive regulation of canonical Wnt receptor signaling pathway	7.35037
cholesterol homeostasis	7.35037
positive regulation of protein catabolic process	7.30071
response to organic nitrogen	7.26146
positive regulation of angiogenesis	7.16244
positive regulation of JNK cascade	7.06212
response to ionizing radiation	7.06212
response to heat	7.03454
cell-cell adhesion	7.00327
positive regulation of catalytic activity	6.92631
response to gamma radiation	6.92631
organ regeneration	6.85103
skeletal system development	6.83864
negative regulation of gene expression	6.77736
hair follicle development	6.75316
positive regulation of MAPK cascade	6.66978
cell surface receptor signaling pathway	6.62074
positive regulation of inflammatory response	6.58845
mitochondrion organization	6.58845
positive regulation of osteoblast differentiation	6.54852
response to retinoic acid	6.52479
neural tube closure	6.52479
wound healing	6.49788
response to virus	6.43158
response to stress	6.38596
blood vessel development	6.31874
response to estradiol stimulus	6.29665
response to organic cyclic compound	6.2638
fatty acid metabolic process	6.2098
glucose metabolic process	6.2098
positive regulation of smooth muscle cell proliferation	5.80917
response to hormone stimulus	5.80917
positive regulation of I-kappaB kinase/NF-kappaB cascade	5.80917
response to oxidative stress	5.76269
blood coagulation	5.71696
regulation of apoptotic process	5.71696
intracellular protein kinase cascade	5.69887
elevation of cytosolic calcium ion concentration	5.67194
cell cycle	5.62763
response to hypoxia	5.58112
MAPK cascade	5.54105
positive regulation of cell migration	5.49875
signal transduction	5.49328
response to insulin stimulus	5.49037
transmembrane transport	5.41607
angiogenesis	5.33144
cytokine-mediated signaling pathway	5.29659
response to wounding	5.29659
cell communication	5.29659
response to glucocorticoid stimulus	5.29659
negative regulation of apoptotic process	5.27443
negative regulation of cell proliferation	5.2622
kidney development	5.25245
aging	5.24054
hemopoiesis	5.21983
lipid metabolic process	5.17483
regulation of cell proliferation	5.14526
endocytosis	5.11603
response to cAMP	5.07279
embryo development	5.04236
cellular response to mechanical stimulus	5.00234
cell migration	5.00234
negative regulation of cell migration	4.93381
positive regulation of gene expression	4.86714
cell proliferation	4.86714
cell adhesion	4.84842
protein phosphorylation	4.84646
oxidation-reduction process	4.71649
response to toxic substance	4.68969
regulation of cell cycle	4.67751
central nervous system development	4.67751
cell differentiation	4.65162
positive regulation of peptidyl-tyrosine phosphorylation	4.61754
multicellular organismal development	4.57066
negative regulation of canonical Wnt receptor signaling pathway	4.55909
cell cycle arrest	4.55909
lung development	4.53994
response to ethanol	4.43869
response to organic substance	4.43869
response to drug	4.28772
negative regulation of cell growth	4.24727
immune response	4.188
axon guidance	4.01974
in utero embryonic development	4.00997
positive regulation of protein phosphorylation	3.94921
heart development	3.7714
brain development	3.76745
induction of apoptosis	3.6645
positive regulation of transcription from RNA polymerase II promoter	3.65206
apoptotic process	3.5212
response to DNA damage stimulus	3.50813
positive regulation of apoptotic process	3.49
negative regulation of transcription, DNA-dependent	3.43017
protein transport	3.32259
negative regulation of transcription from RNA polymerase II promoter	3.24801
intracellular protein transport	3.23504
protein homooligomerization	3.21579
spermatogenesis	3.1817
metabolic process	3.1319
positive regulation of transcription, DNA-dependent	3.09235
positive regulation of cell proliferation	3.01687
proteolysis	2.98276
regulation of transcription, DNA-dependent	2.37997
biological_process	1.79061
G-protein coupled receptor signaling pathway	0.247709
G-protein coupled receptor signaling pathway	-0.33528
proteolysis	-2.35506
biological_process	-2.36593
transcription, DNA-dependent	-2.53905
negative regulation of transcription from RNA polymerase II promoter	-2.6052
positive regulation of transcription from RNA polymerase II promoter	-2.95453
heart development	-2.97773
regulation of transcription, DNA-dependent	-2.98273
negative regulation of apoptotic process	-3.05961
protein phosphorylation	-3.22236
cell differentiation	-3.29795
signal transduction	-3.44826
positive regulation of gene expression	-3.51349
positive regulation of cell proliferation	-3.5599
protein autophosphorylation	-3.59966
apoptotic process	-3.63126
brain development	-3.73952
positive regulation of transcription, DNA-dependent	-3.77523
induction of apoptosis	-3.77905
intracellular signal transduction	-3.78706
protein ubiquitination	-3.80857
carbohydrate metabolic process	-3.86903
regulation of apoptotic process	-3.86903
positive regulation of I-kappaB kinase/NF-kappaB cascade	-3.93143
regulation of gene expression	-3.96339
DNA repair	-3.97725
response to hypoxia	-4.0289
regulation of cell proliferation	-4.06248
negative regulation of transcription, DNA-dependent	-4.06248
male gonad development	-4.14539
response to DNA damage stimulus	-4.22076
positive regulation of protein phosphorylation	-4.27629
negative regulation of cell growth	-4.59903
ubiquitin-dependent protein catabolic process	-4.67623
response to retinoic acid	-4.71012
positive regulation of cell growth	-4.85072
regulation of Rho protein signal transduction	-4.99997
positive regulation of apoptotic process	-5.03873
intracellular protein kinase cascade	-5.14238
palate development	-5.24191
regulation of cell cycle	-5.27594
calcium ion transport	-5.4775
activation of cysteine-type endopeptidase activity involved in apoptotic process	-5.48983
multicellular organism growth	-5.7218
response to stress	-5.76238
angiogenesis	-5.8799
cell-cell signaling	-5.90906
embryonic skeletal system morphogenesis	-6.01849
negative regulation of NF-kappaB transcription factor activity	-6.01849
anterior/posterior pattern specification	-6.07473
skeletal system development	-6.17085
peptidyl-tyrosine dephosphorylation	-6.24997
negative regulation of translation	-6.24997
embryonic skeletal system development	-6.41444
response to UV	-6.41444
positive regulation of NF-kappaB transcription factor activity	-6.53732
bone development	-6.5878
positive regulation of protein binding	-6.5878
positive regulation of canonical Wnt receptor signaling pathway	-6.63262
stem cell maintenance	-6.7708
negative regulation of BMP signaling pathway	-6.96425
positive regulation of mesenchymal cell proliferation	-6.96425
embryonic hindlimb morphogenesis	-7.61715
positive regulation of insulin secretion	-7.73805
protein autoubiquitination	-7.86286
embryonic forelimb morphogenesis	-7.86286
pancreas development	-7.86286
positive regulation of cell cycle	-8.12495
response to endoplasmic reticulum stress	-8.12495
receptor internalization	-8.40513
embryonic limb morphogenesis	-8.55258
protein deubiquitination	-8.70531
telomere maintenance	-8.70531
positive regulation of protein catabolic process	-8.78373
cellular response to glucose stimulus	-9.2329
chondrocyte differentiation	-9.28566
B cell receptor signaling pathway	-9.37495
cellular response to starvation	-9.37495
vasodilation	-9.74995
heterophilic cell-cell adhesion	-9.74995
phospholipid biosynthetic process	-10.5978
ventricular septum morphogenesis	-11.0795
epidermal growth factor receptor signaling pathway	-11.0795
microtubule bundle formation	-11.0795
histone mRNA catabolic process	-11.6071
dentate gyrus development	-11.6071
negative regulation of endothelial cell migration	-11.6071
toll-like receptor signaling pathway	-11.6071
lens morphogenesis in camera-type eye	-11.6071
chondrocyte development	-11.6071
urogenital system development	-11.6071
cellular response to fibroblast growth factor stimulus	-11.6071
histone methylation	-11.6071
embryonic pattern specification	-11.6071
positive regulation of cardiac muscle cell proliferation	-12.1874
endothelial cell migration	-12.1874
generation of neurons	-12.4999
thalamus development	-12.4999
DNA damage response, signal transduction by p53 class mediator resulting in cell cycle arrest	-12.4999
DNA methylation	-12.4999
gastrulation with mouth forming second	-12.9999
chromatin modification	-13.2652
regulation of osteoclast differentiation	-13.5416
phosphatidylinositol-3-phosphate biosynthetic process	-13.5416
actomyosin structure organization	-13.5416
nucleosome disassembly	-13.5416
negative regulation of mitotic cell cycle	-13.5416
negative regulation of protein serine/threonine kinase activity	-14.7726
kidney morphogenesis	-14.7726
vagina development	-14.7726
retina morphogenesis in camera-type eye	-14.7726
S-adenosylhomocysteine metabolic process	-14.7726
positive regulation of DNA damage response, signal transduction by p53 class mediator	-14.7726
negative regulation of programmed cell death	-14.7726
platelet formation	-14.7726
cerebral cortex cell migration	-14.7726
CTP biosynthetic process	-14.7726
UTP biosynthetic process	-14.7726
GTP biosynthetic process	-14.7726
response to ischemia	-14.7726
positive regulation of defense response to virus by host	-14.7726
lymph vessel development	-14.7726
spliceosomal complex assembly	-14.7726
positive regulation of branching involved in ureteric bud morphogenesis	-14.7726
negative regulation of transcription regulatory region DNA binding	-16.2499
S-adenosylmethionine metabolic process	-16.2499
negative regulation of microtubule polymerization	-16.2499
peptidyl-lysine methylation	-16.2499
ventricular trabecula myocardium morphogenesis	-16.2499
cardiac right ventricle morphogenesis	-16.2499
regulation of gene expression by genetic imprinting	-16.2499
primitive streak formation	-18.0555
histone H3-K4 trimethylation	-18.0555
cellular response to fluid shear stress	-18.0555
positive regulation of histone H3-K4 methylation	-18.0555
negative regulation of kinase activity	-18.0555
ER overload response	-18.0555
nucleotide-excision repair, DNA gap filling	-18.0555
synaptic vesicle endocytosis	-18.7499
cellular response to exogenous dsRNA	-20.3124
ATP-dependent chromatin remodeling	-20.3124
cellular response to hepatocyte growth factor stimulus	-20.3124
negative regulation of translation involved in gene silencing by miRNA	-20.3124
regulation of fatty acid metabolic process	-20.3124
positive regulation of systemic arterial blood pressure	-20.3124
positive regulation of ATPase activity	-20.3124
retina layer formation	-20.3124
embryonic viscerocranium morphogenesis	-22.159
epithelium development	-23.2142
cardiac ventricle morphogenesis	-23.2142
germinal center formation	-23.2142
positive regulation of cardiac muscle cell differentiation	-27.0832
neural precursor cell proliferation	-27.0832
negative regulation of pathway-restricted SMAD protein phosphorylation	-27.0832
regulation of nucleocytoplasmic transport	-27.0832
exonucleolytic nuclear-transcribed mRNA catabolic process involved in deadenylation-dependent decay	-27.0832
neural crest cell differentiation	-27.0832
mesenchymal cell development	-27.0832
response to external stimulus	-27.0832
activation of cysteine-type endopeptidase activity involved in apoptotic process by cytochrome c	-27.0832
secondary heart field specification	-27.0832
cardiac muscle hypertrophy in response to stress	-27.0832
activation of innate immune response	-27.0832
embryonic retina morphogenesis in camera-type eye	-30.4686
dorsal aorta morphogenesis	-32.4998
regulation of histone acetylation	-32.4998
negative regulation of T cell differentiation in thymus	-32.4998
positive regulation of type I interferon production	-32.4998
regulation of vascular endothelial growth factor receptor signaling pathway	-32.4998
sterol metabolic process	-32.4998
maintenance of DNA methylation	-32.4998
pericardium morphogenesis	-32.4998
atrial septum primum morphogenesis	-32.4998
cardiac ventricle formation	-32.4998
pattern recognition receptor signaling pathway	-32.4998
DNA double-strand break processing	-32.4998
neural retina development	-36.1109
positive regulation of histone H3-K27 methylation	-40.6248
regulation of smooth muscle cell migration	-40.6248
histone phosphorylation	-46.4283
positive regulation of nephron tubule epithelial cell differentiation	-54.1664
regulation of lipid kinase activity	-54.1664
ascending aorta morphogenesis	-54.1664
positive regulation of chromatin silencing	-54.1664
negative regulation of phosphatidylcholine biosynthetic process	-81.2495
positive regulation of forebrain neuron differentiation	-81.2495
regulation of cytoplasmic translation	-81.2495
positive regulation of N-terminal peptidyl-lysine acetylation	-81.2495
regulation of hepatocyte proliferation	-81.2495
negative regulation of Rho-dependent protein serine/threonine kinase activity	-81.2495
negative regulation of planar cell polarity pathway involved in neural tube closure	-81.2495
negative regulation of planar cell polarity pathway involved in pericardium morphogenesis	-81.2495
negative regulation of planar cell polarity pathway involved in outflow tract morphogenesis	-81.2495
negative regulation of planar cell polarity pathway involved in cardiac right atrium morphogenesis	-81.2495
regulation of retrograde vesicle-mediated transport, Golgi to ER	-81.2495
negative regulation of planar cell polarity pathway involved in cardiac muscle tissue morphogenesis	-81.2495
negative regulation of planar cell polarity pathway involved in ventricular septum morphogenesis	-81.2495
regulation of smooth muscle cell-matrix adhesion	-81.2495
positive regulation of Wnt receptor signaling pathway involved in dorsal/ventral axis specification	-81.2495
positive regulation of cell cycle checkpoint	-81.2495
negative regulation of histone H3-K27 acetylation	-81.2495
lipid hydroperoxide transport	-81.2495
negative regulation of bone mineralization involved in bone maturation	-81.2495
negative regulation of bone trabecula formation	-81.2495
gamma-aminobutyric acid receptor clustering	-81.2495
negative regulation of osteoclast proliferation	-81.2495
hepatocyte proliferation	-81.2495
signal transduction by p53 class mediator	-81.2495
metanephric renal vesicle morphogenesis	-81.2495
renal vesicle morphogenesis	-81.2495
positive regulation of IP-10 production	-81.2495
positive regulation of chemokine (C-C motif) ligand 5 production	-81.2495
negative regulation of thrombin receptor signaling pathway	-81.2495
synaptonemal complex disassembly	-81.2495
canonical Wnt receptor signaling pathway involved in cardiac neural crest cell differentiation involved in heart development	-81.2495
angiogenesis involved in coronary vascular morphogenesis	-81.2495
regulation of homologous chromosome segregation	-81.2495
trachea cartilage development	-81.2495
regulation of cell development	-81.2495
camera-type eye photoreceptor cell fate commitment	-81.2495
regulation of synaptic activity	-81.2495
negative regulation of norepinephrine uptake	-81.2495
meiotic recombination checkpoint	-81.2495
response to methylglyoxal	-81.2495
negative regulation of dopamine uptake involved in synaptic transmission	-81.2495
chromosome separation	-81.2495
regulation of sequestering of calcium ion	-81.2495
establishment of localization	-81.2495
constitutive protein ectodomain proteolysis	-81.2495
regulation of acyl-CoA biosynthetic process	-81.2495
interleukin-1 alpha secretion	-81.2495
maintenance of presynaptic active zone structure	-81.2495
negative regulation of collateral sprouting in absence of injury	-81.2495
negative regulation of eye pigmentation	-81.2495
rhodopsin metabolic process	-81.2495
dUTP catabolic process	-81.2495
positive regulation of steroid metabolic process	-81.2495
respiratory burst after phagocytosis	-81.2495
regulation of auditory receptor cell differentiation	-81.2495
histone H2A-S1 phosphorylation	-81.2495
dipeptide transport	-81.2495
cellular response to trichostatin A	-81.2495
horizontal cell localization	-81.2495
nephric duct elongation	-81.2495
uterine epithelium development	-81.2495
oviduct epithelium development	-81.2495
response to hepatocyte growth factor stimulus	-81.2495
DNA replication-dependent nucleosome disassembly	-81.2495
positive regulation of type III interferon production	-81.2495
protein glycosylation in endoplasmic reticulum	-81.2495
geranylgeranyl diphosphate biosynthetic process	-81.2495
regulation of histone ubiquitination	-81.2495
positive regulation of GTP catabolic process	-81.2495
negative regulation of monooxygenase activity	-81.2495
positive regulation of intracellular cholesterol transport	-81.2495
positive regulation of protein polymerization	-81.2495
positive regulation of cyclin-dependent protein serine/threonine kinase activity involved in G2/M transition of mitotic cell cycle	-81.2495
positive regulation of histone modification	-81.2495
mitotic spindle organization in nucleus	-81.2495
lipid modification	-81.2495
forebrain generation of neurons	-81.2495
hemolysis by symbiont of host erythrocytes	-81.2495
glucuronoside catabolic process	-81.2495
acetyl-CoA transport	-81.2495
neural crest formation	-81.2495
cellular magnesium ion homeostasis	-81.2495
regulation of necrotic cell death	-81.2495
regulation of proton-transporting ATPase activity, rotational mechanism	-81.2495
mRNA localization resulting in posttranscriptional regulation of gene expression	-81.2495
regulation of phospholipase activity	-81.2495
response to blue light	-81.2495
dUMP biosynthetic process	-81.2495
growth plate cartilage chondrocyte growth	-81.2495
growth plate cartilage chondrocyte morphogenesis	-81.2495
tricuspid valve morphogenesis	-81.2495
sinoatrial valve morphogenesis	-81.2495
primary heart field specification	-81.2495
regulation of T cell mediated immunity	-81.2495
hepatocyte cell migration	-81.2495
IRES-dependent translational initiation	-81.2495
cap-independent translational initiation	-81.2495
sebaceous gland cell differentiation	-81.2495
polysaccharide biosynthetic process	-81.2495
regulation of mitotic recombination	-81.2495
regulation of DNA recombination	-81.2495
negative regulation of translation in response to stress	-81.2495

## Sheet: upregulated GO-(-LgP)
go_name	(-LgP)
negative regulation of apoptotic process	11.2572
response to lipopolysaccharide	10.8183
inflammatory response	9.67527
signal transduction	9.59548
cellular response to interleukin-1	7.96139
positive regulation of transcription from RNA polymerase II promoter	7.89314
response to organic cyclic compound	7.48194
negative regulation of cell proliferation	7.22602
response to cobalamin	7.2209
response to drug	7.19769
protein phosphorylation	7.05139
response to hydrogen peroxide	6.7538
response to bacterium	6.57512
liver development	6.54312
response to hypoxia	6.35586
response to cytokine stimulus	6.34295
cellular response to tumor necrosis factor	6.23507
response to nutrient	6.17034
heterophilic cell-cell adhesion	5.96721
insulin receptor signaling pathway	5.59886
positive regulation of cell growth	5.4927
acute inflammatory response	5.43516
response to fluid shear stress	5.39117
cellular response to lipopolysaccharide	5.23968
cell adhesion	5.20292
defense response to Gram-negative bacterium	5.04822
cell differentiation	4.99258
glucose homeostasis	4.94117
regulation of protein ubiquitination	4.92173
response to stress	4.75406
cellular response to insulin stimulus	4.73922
chronic inflammatory response	4.72927
regulation of cell shape	4.70049
response to mechanical stimulus	4.70049
response to estradiol stimulus	4.69942
placenta development	4.62791
cell morphogenesis	4.5414
innate immune response	4.40855
aging	4.40321
response to progesterone stimulus	4.32957
response to amino acid stimulus	4.32957
defense response to virus	4.30652
embryonic digestive tract development	4.25885
negative regulation of transcription from RNA polymerase II promoter	4.21019
response to calcium ion	4.04469
negative regulation of transcription, DNA-dependent	4.02511
oxidation-reduction process	3.97702
epithelial cell maturation	3.97366
myeloid progenitor cell differentiation	3.97366
neutrophil chemotaxis	3.915
cell proliferation	3.72812
positive regulation of gene expression	3.72812
positive regulation of transcription, DNA-dependent	3.71152
cellular response to extracellular stimulus	3.69005
angiogenesis	3.65597
apoptotic process	3.64203
positive regulation of angiogenesis	3.63136
cell-cell adhesion	3.56888
blood vessel endothelial cell migration	3.53371
response to reactive oxygen species	3.50901
gluconeogenesis	3.50901
organ regeneration	3.50801
positive regulation of I-kappaB kinase/NF-kappaB cascade	3.50467
multicellular organismal development	3.49964
response to oxidative stress	3.48013
negative regulation of gene expression	3.47816
negative regulation of cysteine-type endopeptidase activity involved in apoptotic process	3.46145
positive regulation of protein kinase B signaling cascade	3.46145
regulation of apoptotic process	3.45582
elevation of cytosolic calcium ion concentration	3.43174
cell cycle	3.4079
cell death	3.39629
skeletal system morphogenesis	3.39629
wound healing	3.36241
negative regulation of epidermal growth factor receptor signaling pathway	3.36122
leukocyte cell-cell adhesion	3.34653
in utero embryonic development	3.34283
positive regulation of cell migration	3.33768
proteolysis	3.31265
transmembrane transport	3.29195
response to glucocorticoid stimulus	3.22489
cellular response to drug	3.20492
immune response	3.18793
protein oligomerization	3.16003
regulation of cell proliferation	3.13823
regulation of cell growth	3.11621
oxaloacetate metabolic process	3.07521
positive regulation of vasodilation	3.06471
skeletal system development	2.99117
neuron projection morphogenesis	2.9508
positive regulation of MAPK cascade	2.93198
fat cell differentiation	2.91172
negative regulation of inflammatory response	2.91172
response to virus	2.84634
regulation of I-kappaB kinase/NF-kappaB cascade	2.84352
skeletal muscle tissue regeneration	2.84352
cellular response to peptide	2.84352
nuclear membrane organization	2.83379
response to hyperoxia	2.8264
cellular response to glucocorticoid stimulus	2.8264
brain development	2.82084
kidney development	2.7915
oocyte maturation	2.74237
activation of phospholipase C activity	2.74237
positive regulation of cell proliferation	2.73304
embryo development	2.68479
G-protein coupled receptor signaling pathway	2.6841
cell migration	2.66407
triglyceride homeostasis	2.64905
response to hormone stimulus	2.60964
response to organic nitrogen	2.59407
positive regulation of apoptotic process	2.56294
cellular amino acid metabolic process	2.56246
retinoic acid metabolic process	2.56246
regulation of transcription, DNA-dependent	2.54058
positive regulation of glomerular filtration	2.53597
internal protein amino acid acetylation	2.53597
purine ribonucleoside monophosphate biosynthetic process	2.53597
negative regulation of cholesterol storage	2.53597
negative regulation of sequestering of triglyceride	2.53597
transformation of host cell by virus	2.53597
viral entry into host cell	2.53597
ketone body biosynthetic process	2.53597
nucleotide-binding oligomerization domain containing 2 signaling pathway	2.53597
response to heat	2.53071
focal adhesion assembly	2.48173
cellular response to hydrogen peroxide	2.4395
cell surface receptor signaling pathway	2.41062
negative regulation of myeloid cell differentiation	2.40613
digestive tract morphogenesis	2.40613
protein transport	2.40071
neural tube closure	2.38188
response to retinoic acid	2.38188
response to organic substance	2.35783
response to ethanol	2.35783
cell growth	2.35675
lung alveolus development	2.35675
cell-cell junction organization	2.33508
negative regulation of neuron death	2.33508
negative regulation of cytokine production	2.31733
negative regulation of mature B cell apoptotic process	2.31733
glycosaminoglycan catabolic process	2.31733
branched-chain amino acid catabolic process	2.31733
membrane to membrane docking	2.31733
positive regulation of toll-like receptor 4 signaling pathway	2.31733
positive regulation of keratinocyte migration	2.31733
adhesion to symbiont	2.31733
response to antibiotic	2.31708
neuron development	2.27847
spermatogenesis	2.2601
heart development	2.24718
response to nicotine	2.24087
regulation of mitotic cell cycle	2.20471
negative regulation of viral genome replication	2.20471
positive regulation of T cell proliferation	2.1685
epidermal growth factor receptor signaling pathway	2.14461
negative regulation of protein catabolic process	2.14461
glycosphingolipid metabolic process	2.14444
activation of transmembrane receptor protein tyrosine kinase activity	2.14444
bleb assembly	2.14444
tetrahydrofolate interconversion	2.14444
cellular lipid metabolic process	2.14444
negative regulation of oxidoreductase activity	2.14444
negative regulation of stress fiber assembly	2.14444
multicellular organismal iron ion homeostasis	2.14444
positive regulation of interleukin-8 secretion	2.14444
positive regulation of interleukin-6 secretion	2.14444
intracellular protein kinase cascade	2.11894
negative regulation of epithelial cell proliferation	2.09965
leukocyte migration	2.08749
membrane depolarization	2.08749
cholesterol homeostasis	2.06645
positive regulation of canonical Wnt receptor signaling pathway	2.06645
lung development	2.056
response to insulin stimulus	2.04767
I-kappaB kinase/NF-kappaB cascade	2.03307
intracellular receptor signaling pathway	2.03307
response to fatty acid	2.03307
response to ionizing radiation	2.00233
positive regulation of JNK cascade	2.00233
complement activation, lectin pathway	2.00152
ethanol catabolic process	2.00152
activation-induced cell death of T cells	2.00152
methionine biosynthetic process	2.00152
response to temperature stimulus	2.00152
positive regulation of T cell differentiation in thymus	2.00152
regulation of protein complex assembly	2.00152
positive regulation of interleukin-12 biosynthetic process	2.00152
positive regulation of heart contraction	2.00152
lung vasculature development	2.00152
chorio-allantoic fusion	2.00152
enamel mineralization	2.00152
embryonic placenta development	1.98112
lipid metabolic process	1.93556
one-carbon metabolic process	1.93144
lipoprotein metabolic process	1.93144
reactive oxygen species metabolic process	1.93144
endocytosis	1.91406
induction of apoptosis	1.88615
glucose transport	1.88385
positive regulation of osteoblast differentiation	1.88237
negative regulation of macrophage derived foam cell differentiation	1.87978
positive regulation of cyclin-dependent protein serine/threonine kinase activity involved in G1/S transition of mitotic cell cycle	1.87978
regulation of TOR signaling cascade	1.87978
purinergic nucleotide receptor signaling pathway	1.87978
respiratory burst	1.87978
negative regulation of meiosis	1.87978
tetrahydrofolate metabolic process	1.87978
negative regulation of immune response	1.87978
negative regulation of cardiac muscle cell proliferation	1.87978
diaphragm development	1.87978
positive regulation of synapse maturation	1.87978
T cell activation	1.8382
intrinsic apoptotic signaling pathway in response to DNA damage by p53 class mediator	1.8382
positive regulation of nitric oxide biosynthetic process	1.8382
blood vessel development	1.82613
biological_process	1.79986
glucose metabolic process	1.79887
fatty acid metabolic process	1.79887
response to molecule of bacterial origin	1.77383
cardiac left ventricle morphogenesis	1.77383
germ cell migration	1.77383
toxin metabolic process	1.77383
negative regulation of cardiac muscle cell apoptotic process	1.77383
positive regulation of pseudopodium assembly	1.77383
cellular response to nutrient levels	1.77383
response to muramyl dipeptide	1.77383
positive regulation of superoxide anion generation	1.77383
behavioral response to ethanol	1.77383
tissue remodeling	1.77383
leukocyte tethering or rolling	1.77383
regulation of neuron apoptotic process	1.75213
positive regulation of cell cycle	1.75213
response to toxic substance	1.7521
metabolic process	1.7517
activation of MAPKK activity	1.71149
face morphogenesis	1.71149
positive regulation of smooth muscle cell proliferation	1.69506
diterpenoid metabolic process	1.68011
calcium-dependent cell-cell adhesion	1.68011
positive regulation of catenin import into nucleus	1.68011
stress fiber assembly	1.68011
hematopoietic stem cell proliferation	1.68011
Rho protein signal transduction	1.67229
tissue regeneration	1.67229
response to electrical stimulus	1.67229
blood coagulation	1.67033
glutathione metabolic process	1.63445
iron ion transport	1.63445
synapse assembly	1.63445
positive regulation of vasoconstriction	1.63445
MAPK cascade	1.62224
regulation of cell adhesion	1.59788
response to starvation	1.59788
negative regulation of MAP kinase activity	1.59788
positive regulation of T-helper 1 type immune response	1.59616
salivary gland morphogenesis	1.59616
negative regulation of epithelial to mesenchymal transition	1.59616
positive regulation of triglyceride biosynthetic process	1.59616
positive regulation of cholesterol efflux	1.59616
cerebellar Purkinje cell layer development	1.59616
regulation of circadian rhythm	1.59616
negative regulation of JUN kinase activity	1.59616
cellular protein catabolic process	1.59616
negative regulation of cell growth	1.57147
response to amphetamine	1.56251
protein targeting	1.56251
cell communication	1.55329
response to wounding	1.55329
cytokine-mediated signaling pathway	1.55329
hemopoiesis	1.5311
patterning of blood vessels	1.52827
embryo implantation	1.52827
endothelial cell proliferation	1.52016
cellular zinc ion homeostasis	1.52016
DNA damage response, signal transduction by p53 class mediator	1.52016
positive regulation of cellular protein metabolic process	1.52016
response to glucagon stimulus	1.52016
positive regulation of histone acetylation	1.52016
regulation of mRNA stability	1.52016
oocyte development	1.52016
positive regulation of positive chemotaxis	1.52016
heart contraction	1.52016
response to DNA damage stimulus	1.51119
positive regulation of protein catabolic process	1.49509
response to cAMP	1.48786
axon guidance	1.47296
cellular response to mechanical stimulus	1.46679
cAMP catabolic process	1.4508
response to gravity	1.4508
regulation of glucose metabolic process	1.4508
negative regulation of cell migration	1.44606
positive regulation of protein phosphorylation	1.44159
response to gamma radiation	1.4317
positive regulation of catalytic activity	1.4317
hair follicle development	1.40138
positive regulation of calcium ion transport into cytosol	1.38703
collagen catabolic process	1.38703
skeletal muscle fiber development	1.38703
negative regulation of cytokine secretion	1.38703
negative regulation of peptidyl-tyrosine phosphorylation	1.38703
positive regulation of nitric-oxide synthase activity	1.38703
chaperone mediated protein folding requiring cofactor	1.38703
zinc ion transmembrane transport	1.38703
mitochondrion organization	1.37191
positive regulation of inflammatory response	1.37191
central nervous system development	1.36644
regulation of cell cycle	1.36644
regulation of transcription involved in S phase of mitotic cell cycle	1.35239
regulation of transcription involved in G2/M-phase of mitotic cell cycle	1.35239
positive regulation of histone H3-K36 methylation	1.35239
initiation of primordial ovarian follicle growth	1.35239
germinal center B cell differentiation	1.35239
hepatic immune response	1.35239
immunoglobulin transcytosis in epithelial cells mediated by polymeric immunoglobulin receptor	1.35239
T cell antigen processing and presentation	1.35239
activation of plasma proteins involved in acute inflammatory response	1.35239
growth plate cartilage chondrocyte differentiation	1.35239
acetaldehyde metabolic process	1.35239
deoxyadenosine catabolic process	1.35239
dicarboxylic acid transport	1.35239
cellular cadmium ion homeostasis	1.35239
spindle assembly involved in female meiosis I	1.35239
nucleoside diphosphate catabolic process	1.35239
vascular transport	1.35239
regulation of cGMP-mediated signaling	1.35239
regulation of macrophage chemotaxis	1.35239
nitrite transport	1.35239
creatine transport	1.35239
molecular hydrogen transport	1.35239
peptidyl-glutamic acid carboxylation	1.35239
arsonoacetate metabolic process	1.35239
L-lysine catabolic process	1.35239
cell motility involved in cerebral cortex radial glia guided migration	1.35239
BMP signaling pathway involved in spinal cord dorsal/ventral patterning	1.35239
regulation of cGMP biosynthetic process	1.35239
regulation of actin filament length	1.35239
purine nucleotide salvage	1.35239
intracellular sterol transport	1.35239
interleukin-3 production	1.35239
negative regulation of chemokine production	1.35239
regulation of inositol trisphosphate biosynthetic process	1.35239
L-lysine catabolic process to acetyl-CoA via L-pipecolate	1.35239
negative regulation of toll-like receptor 3 signaling pathway	1.35239
positive regulation of leukotriene production involved in inflammatory response	1.35239
chemokine (C-C motif) ligand 2 secretion	1.35239
vascular endothelial growth factor receptor-2 signaling pathway	1.35239
L-arginine import	1.35239
telomere maintenance in response to DNA damage	1.35239
positive regulation of eosinophil degranulation	1.35239
molybdopterin cofactor metabolic process	1.35239
nose morphogenesis	1.35239
nitrate catabolic process	1.35239
multicellular organismal protein catabolic process	1.35239
fibroblast apoptotic process	1.35239
negative regulation of interleukin-12 biosynthetic process	1.35239
FasL biosynthetic process	1.35239
MHC class II biosynthetic process	1.35239
positive regulation of striated muscle tissue development	1.35239
dATP catabolic process	1.35239
xanthine biosynthetic process	1.35239
acetaldehyde biosynthetic process	1.35239
nitric oxide catabolic process	1.35239
glycerol biosynthetic process from pyruvate	1.35239
negative regulation of hepatocyte growth factor biosynthetic process	1.35239
negative regulation of muscle organ development	1.35239
negative regulation of DNA metabolic process	1.35239
negative regulation of ubiquitin-protein ligase activity involved in mitotic cell cycle	1.35239
negative regulation of elastin biosynthetic process	1.35239
negative regulation of amino acid transport	1.35239
serotonin secretion, neurotransmission	1.35239
milk ejection	1.35239
negative regulation of adenosine receptor signaling pathway	1.35239
negative regulation of penile erection	1.35239
regulation of calcidiol 1-monooxygenase activity	1.35239
inhibition of mitotic anaphase-promoting complex activity	1.35239
epithelial cell maturation involved in salivary gland development	1.35239
negative regulation of vascular wound healing	1.35239
ciliary body morphogenesis	1.35239
alveolar primary septum development	1.35239
negative regulation of dermatome development	1.35239
regulation of transcription from RNA polymerase II promoter in response to hypoxia	1.35239
connective tissue development	1.35239
glucagon secretion	1.35239
T cell apoptotic process	1.35239
peptidyl-serine dephosphorylation	1.35239
vitamin D receptor signaling pathway	1.35239
leukocyte proliferation	1.35239
divalent metal ion export	1.35239
positive regulation of neutrophil mediated killing of gram-negative bacterium	1.35239
cellular response to gravity	1.35239
regulation of hair follicle cell proliferation	1.35239
vitamin A import	1.35239
regulation of glycolysis by positive regulation of transcription from RNA polymerase II promoter	1.35239
regulation of cellular ketone metabolic process by positive regulation of transcription from RNA polymerase II promoter	1.35239
interleukin-10 secretion	1.35239
chemokine secretion	1.35239
negative regulation of chemokine secretion	1.35239
negative regulation of secretion of lysosomal enzymes	1.35239
cellular organofluorine metabolic process	1.35239
mitochondrial respiratory chain complex I biogenesis	1.35239
cellular response to toxic substance	1.35239
regulation of protein ubiquitination involved in ubiquitin-dependent protein catabolic process	1.35239
positive regulation of leukocyte apoptotic process	1.35239
negative regulation of hydrogen peroxide catabolic process	1.35239
positive regulation of T-helper 17 cell lineage commitment	1.35239
intracellular protein transport	1.34827
positive regulation of peptidyl-tyrosine phosphorylation	1.34732
protein homooligomerization	1.33644
cell cycle arrest	1.32849
negative regulation of canonical Wnt receptor signaling pathway	1.32849
inflammatory response to antigenic stimulus	1.32806
positive regulation of leukocyte migration	1.32806
protein N-linked glycosylation	1.32806
signal transduction by phosphorylation	1.32806
negative regulation of MAPK cascade	1.32806
positive regulation of T cell differentiation	1.32806

## Sheet: downregulated GO-(-LgP)
go_name	(-LgP)
positive regulation of transcription, DNA-dependent	6.51541
negative regulation of transcription, DNA-dependent	6.47823
chromatin modification	6.23677
positive regulation of apoptotic process	6.17599
biological_process	5.7288
histone phosphorylation	5.51061
positive regulation of transcription from RNA polymerase II promoter	5.30617
regulation of transcription, DNA-dependent	5.17525
neural retina development	4.96283
angiogenesis	4.88869
positive regulation of cell proliferation	4.48632
response to stress	4.36606
apoptotic process	4.32893
signal transduction	4.05448
negative regulation of apoptotic process	3.87041
response to hypoxia	3.67196
anterior/posterior pattern specification	3.64848
embryonic limb morphogenesis	3.53993
embryonic retina morphogenesis in camera-type eye	3.40155
positive regulation of NF-kappaB transcription factor activity	3.38548
positive regulation of branching involved in ureteric bud morphogenesis	3.25421
protein phosphorylation	3.23894
activation of innate immune response	3.22945
cardiac muscle hypertrophy in response to stress	3.22945
negative regulation of translation in response to stress	3.21836
transcription, DNA-dependent	3.18587
intracellular signal transduction	3.12929
cellular response to glucose stimulus	3.09111
brain development	3.08189
gastrulation with mouth forming second	3.02903
embryonic viscerocranium morphogenesis	2.94423
ubiquitin-dependent protein catabolic process	2.86054
retina layer formation	2.82328
positive regulation of ATPase activity	2.82328
skeletal system development	2.75462
positive regulation of chromatin silencing	2.7448
ascending aorta morphogenesis	2.7448
regulation of lipid kinase activity	2.7448
positive regulation of nephron tubule epithelial cell differentiation	2.7448
synaptic vesicle endocytosis	2.71332
negative regulation of transcription from RNA polymerase II promoter	2.66328
cell differentiation	2.62119
protein ubiquitination	2.56979
response to DNA damage stimulus	2.56497
regulation of gene expression by genetic imprinting	2.51963
calcium ion transport	2.47914
chondrocyte differentiation	2.45435
regulation of smooth muscle cell migration	2.44733
positive regulation of histone H3-K27 methylation	2.44733
positive regulation of protein catabolic process	2.36193
negative regulation of mitotic cell cycle	2.27787
induction of apoptosis	2.25533
DNA double-strand break processing	2.22904
pattern recognition receptor signaling pathway	2.22904
cardiac ventricle formation	2.22904
atrial septum primum morphogenesis	2.22904
pericardium morphogenesis	2.22904
maintenance of DNA methylation	2.22904
sterol metabolic process	2.22904
regulation of vascular endothelial growth factor receptor signaling pathway	2.22904
positive regulation of type I interferon production	2.22904
negative regulation of T cell differentiation in thymus	2.22904
regulation of histone acetylation	2.22904
dorsal aorta morphogenesis	2.22904
positive regulation of insulin secretion	2.15385
endothelial cell migration	2.1406
positive regulation of cardiac muscle cell proliferation	2.1406
regulation of cell proliferation	2.13949
multicellular organism growth	2.13031
negative regulation of cell growth	2.08733
DNA repair	2.08723
embryonic pattern specification	2.07761
histone methylation	2.07761
cellular response to fibroblast growth factor stimulus	2.07761
positive regulation of gene expression	2.05682
secondary heart field specification	2.05651
activation of cysteine-type endopeptidase activity involved in apoptotic process by cytochrome c	2.05651
response to external stimulus	2.05651
mesenchymal cell development	2.05651
neural crest cell differentiation	2.05651
exonucleolytic nuclear-transcribed mRNA catabolic process involved in deadenylation-dependent decay	2.05651
regulation of nucleocytoplasmic transport	2.05651
negative regulation of pathway-restricted SMAD protein phosphorylation	2.05651
neural precursor cell proliferation	2.05651
positive regulation of cardiac muscle cell differentiation	2.05651
G-protein coupled receptor signaling pathway	2.05326
activation of cysteine-type endopeptidase activity involved in apoptotic process	2.0509
microtubule bundle formation	2.01791
epidermal growth factor receptor signaling pathway	2.01791
ventricular septum morphogenesis	2.01791
regulation of cell cycle	1.97526
phospholipid biosynthetic process	1.96117
stem cell maintenance	1.93887
positive regulation of protein phosphorylation	1.92887
intracellular protein kinase cascade	1.92677
proteolysis	1.92541
germinal center formation	1.91393
cardiac ventricle morphogenesis	1.91393
epithelium development	1.91393
positive regulation of canonical Wnt receptor signaling pathway	1.90607
heterophilic cell-cell adhesion	1.85557
vasodilation	1.85557
protein autophosphorylation	1.84563
cellular response to starvation	1.80627
B cell receptor signaling pathway	1.80627
positive regulation of systemic arterial blood pressure	1.79254
regulation of fatty acid metabolic process	1.79254
negative regulation of translation involved in gene silencing by miRNA	1.79254
cellular response to hepatocyte growth factor stimulus	1.79254
ATP-dependent chromatin remodeling	1.79254
cellular response to exogenous dsRNA	1.79254
regulation of gene expression	1.76651
negative regulation of NF-kappaB transcription factor activity	1.75304
embryonic skeletal system morphogenesis	1.75304
positive regulation of I-kappaB kinase/NF-kappaB cascade	1.7494
cell-cell signaling	1.72442
regulation of apoptotic process	1.71571
telomere maintenance	1.7138
protein deubiquitination	1.7138
nucleotide-excision repair, DNA gap filling	1.68694
ER overload response	1.68694
negative regulation of kinase activity	1.68694
positive regulation of histone H3-K4 methylation	1.68694
cellular response to fluid shear stress	1.68694
histone H3-K4 trimethylation	1.68694
primitive streak formation	1.68694
receptor internalization	1.67032
response to endoplasmic reticulum stress	1.6285
positive regulation of cell cycle	1.6285
cardiac right ventricle morphogenesis	1.59357
ventricular trabecula myocardium morphogenesis	1.59357
peptidyl-lysine methylation	1.59357
negative regulation of microtubule polymerization	1.59357
S-adenosylmethionine metabolic process	1.59357
negative regulation of transcription regulatory region DNA binding	1.59357
pancreas development	1.58824
embryonic forelimb morphogenesis	1.58824
protein autoubiquitination	1.58824
embryonic hindlimb morphogenesis	1.54942
palate development	1.53992
male gonad development	1.52992
spliceosomal complex assembly	1.50995
lymph vessel development	1.50995
positive regulation of defense response to virus by host	1.50995
response to ischemia	1.50995
GTP biosynthetic process	1.50995
UTP biosynthetic process	1.50995
CTP biosynthetic process	1.50995
cerebral cortex cell migration	1.50995
platelet formation	1.50995
negative regulation of programmed cell death	1.50995
positive regulation of DNA damage response, signal transduction by p53 class mediator	1.50995
S-adenosylhomocysteine metabolic process	1.50995
retina morphogenesis in camera-type eye	1.50995
vagina development	1.50995
kidney morphogenesis	1.50995
negative regulation of protein serine/threonine kinase activity	1.50995
regulation of Rho protein signal transduction	1.4683
positive regulation of mesenchymal cell proliferation	1.44079
negative regulation of BMP signaling pathway	1.44079
nucleosome disassembly	1.4343
actomyosin structure organization	1.4343
phosphatidylinositol-3-phosphate biosynthetic process	1.4343
regulation of osteoclast differentiation	1.4343
positive regulation of cell growth	1.42273
heart development	1.40732
carbohydrate metabolic process	1.40721
response to retinoic acid	1.37877
positive regulation of protein binding	1.37412
bone development	1.37412
DNA methylation	1.36528
DNA damage response, signal transduction by p53 class mediator resulting in cell cycle arrest	1.36528
thalamus development	1.36528
generation of neurons	1.36528
response to UV	1.34233
embryonic skeletal system development	1.34233
negative regulation of translation	1.31149
peptidyl-tyrosine dephosphorylation	1.31149
regulation of DNA recombination	1.30776
regulation of mitotic recombination	1.30776
polysaccharide biosynthetic process	1.30776
sebaceous gland cell differentiation	1.30776
cap-independent translational initiation	1.30776
IRES-dependent translational initiation	1.30776
hepatocyte cell migration	1.30776
regulation of T cell mediated immunity	1.30776
primary heart field specification	1.30776
sinoatrial valve morphogenesis	1.30776
tricuspid valve morphogenesis	1.30776
growth plate cartilage chondrocyte morphogenesis	1.30776
growth plate cartilage chondrocyte growth	1.30776
dUMP biosynthetic process	1.30776
response to blue light	1.30776
regulation of phospholipase activity	1.30776
mRNA localization resulting in posttranscriptional regulation of gene expression	1.30776
regulation of proton-transporting ATPase activity, rotational mechanism	1.30776
regulation of necrotic cell death	1.30776
cellular magnesium ion homeostasis	1.30776
neural crest formation	1.30776
acetyl-CoA transport	1.30776
glucuronoside catabolic process	1.30776
hemolysis by symbiont of host erythrocytes	1.30776
forebrain generation of neurons	1.30776
lipid modification	1.30776
mitotic spindle organization in nucleus	1.30776
positive regulation of histone modification	1.30776
positive regulation of cyclin-dependent protein serine/threonine kinase activity involved in G2/M transition of mitotic cell cycle	1.30776
positive regulation of protein polymerization	1.30776
positive regulation of intracellular cholesterol transport	1.30776
negative regulation of monooxygenase activity	1.30776
positive regulation of GTP catabolic process	1.30776
regulation of histone ubiquitination	1.30776
geranylgeranyl diphosphate biosynthetic process	1.30776
protein glycosylation in endoplasmic reticulum	1.30776
positive regulation of type III interferon production	1.30776
DNA replication-dependent nucleosome disassembly	1.30776
response to hepatocyte growth factor stimulus	1.30776
oviduct epithelium development	1.30776
uterine epithelium development	1.30776
nephric duct elongation	1.30776
horizontal cell localization	1.30776
cellular response to trichostatin A	1.30776
dipeptide transport	1.30776
histone H2A-S1 phosphorylation	1.30776
regulation of auditory receptor cell differentiation	1.30776
respiratory burst after phagocytosis	1.30776
positive regulation of steroid metabolic process	1.30776
dUTP catabolic process	1.30776
rhodopsin metabolic process	1.30776
negative regulation of eye pigmentation	1.30776
negative regulation of collateral sprouting in absence of injury	1.30776
maintenance of presynaptic active zone structure	1.30776
interleukin-1 alpha secretion	1.30776
regulation of acyl-CoA biosynthetic process	1.30776
constitutive protein ectodomain proteolysis	1.30776
establishment of localization	1.30776
regulation of sequestering of calcium ion	1.30776
chromosome separation	1.30776
negative regulation of dopamine uptake involved in synaptic transmission	1.30776
response to methylglyoxal	1.30776
meiotic recombination checkpoint	1.30776
negative regulation of norepinephrine uptake	1.30776
regulation of synaptic activity	1.30776
camera-type eye photoreceptor cell fate commitment	1.30776
regulation of cell development	1.30776
trachea cartilage development	1.30776
regulation of homologous chromosome segregation	1.30776
angiogenesis involved in coronary vascular morphogenesis	1.30776
canonical Wnt receptor signaling pathway involved in cardiac neural crest cell differentiation involved in heart development	1.30776
synaptonemal complex disassembly	1.30776
negative regulation of thrombin receptor signaling pathway	1.30776
positive regulation of chemokine (C-C motif) ligand 5 production	1.30776
positive regulation of IP-10 production	1.30776
renal vesicle morphogenesis	1.30776
metanephric renal vesicle morphogenesis	1.30776
signal transduction by p53 class mediator	1.30776
hepatocyte proliferation	1.30776
negative regulation of osteoclast proliferation	1.30776
gamma-aminobutyric acid receptor clustering	1.30776
negative regulation of bone trabecula formation	1.30776
negative regulation of bone mineralization involved in bone maturation	1.30776
lipid hydroperoxide transport	1.30776
negative regulation of histone H3-K27 acetylation	1.30776
positive regulation of cell cycle checkpoint	1.30776
positive regulation of Wnt receptor signaling pathway involved in dorsal/ventral axis specification	1.30776
regulation of smooth muscle cell-matrix adhesion	1.30776
negative regulation of planar cell polarity pathway involved in ventricular septum morphogenesis	1.30776
negative regulation of planar cell polarity pathway involved in cardiac muscle tissue morphogenesis	1.30776
regulation of retrograde vesicle-mediated transport, Golgi to ER	1.30776
negative regulation of planar cell polarity pathway involved in cardiac right atrium morphogenesis	1.30776
negative regulation of planar cell polarity pathway involved in outflow tract morphogenesis	1.30776
negative regulation of planar cell polarity pathway involved in pericardium morphogenesis	1.30776
negative regulation of planar cell polarity pathway involved in neural tube closure	1.30776
negative regulation of Rho-dependent protein serine/threonine kinase activity	1.30776
regulation of hepatocyte proliferation	1.30776
positive regulation of N-terminal peptidyl-lysine acetylation	1.30776
regulation of cytoplasmic translation	1.30776
positive regulation of forebrain neuron differentiation	1.30776
negative regulation of phosphatidylcholine biosynthetic process	1.30776
urogenital system development	1.30186
chondrocyte development	1.30186
lens morphogenesis in camera-type eye	1.30186
toll-like receptor signaling pathway	1.30186
negative regulation of endothelial cell migration	1.30186
dentate gyrus development	1.30186
histone mRNA catabolic process	1.30186
