# Supplementary material for: Integrative microRNA-gene expression network analysis in genetic hypercalciuric stone-forming rat kidney
Source: PeerJ. 2016 Mar 31;4:e1884. doi: 10.7717/peerj.1884 (PMC4824905; doi:10.7717/peerj.1884)
Supplement: Table S9 — Information on differential pathways (enrichment and −LogP). [file peerj-04-1884-s009.xls]

## Sheet: upregulated pathway—(-LgP)
path_name	(-LgP)
Metabolic pathways	10.2965
Glycine, serine and threonine metabolism	6.20977
Hepatitis C	6.09996
PPAR signaling pathway	6.05296
Cytokine-cytokine receptor interaction	5.38934
NF-kappa B signaling pathway	5.35519
Legionellosis	4.68244
Pathways in cancer	4.65283
Transcriptional misregulation in cancer	4.62723
Tuberculosis	4.46887
HTLV-I infection	4.40536
Osteoclast differentiation	4.16541
Chronic myeloid leukemia	4.00744
Pantothenate and CoA biosynthesis	4.00688
Chagas disease (American trypanosomiasis)	3.96207
Salmonella infection	3.86384
NOD-like receptor signaling pathway	3.8304
Chemokine signaling pathway	3.82884
Jak-STAT signaling pathway	3.8158
MAPK signaling pathway	3.71827
African trypanosomiasis	3.66685
Cysteine and methionine metabolism	3.60955
HIF-1 signaling pathway	3.55447
Lysosome	3.43174
Toll-like receptor signaling pathway	3.39081
Vitamin digestion and absorption	3.27117
PI3K-Akt signaling pathway	3.23417
Complement and coagulation cascades	3.21302
Mineral absorption	3.16003
Measles	3.13823
Purine metabolism	3.1148
Hepatitis B	3.07519
Valine, leucine and isoleucine degradation	2.9508
beta-Alanine metabolism	2.88259
T cell receptor signaling pathway	2.88083
Cytosolic DNA-sensing pathway	2.76342
Acute myeloid leukemia	2.76342
Glutathione metabolism	2.72822
Malaria	2.6937
Cell adhesion molecules (CAMs)	2.49074
Influenza A	2.45876
One carbon pool by folate	2.33508
Epstein-Barr virus infection	2.30328
Adipocytokine signaling pathway	2.27163
Leishmaniasis	2.24517
Fatty acid degradation	2.1685
Leukocyte transendothelial migration	2.056
Peroxisome	2.0246
TGF-beta signaling pathway	2.0246
Lysine degradation	1.94104
Toxoplasmosis	1.93198
Prostate cancer	1.91406
Glycerolipid metabolism	1.88237
Biosynthesis of amino acids	1.87194
ErbB signaling pathway	1.87194
Arginine and proline metabolism	1.85396
Glycerophospholipid metabolism	1.85131
Chemical carcinogenesis	1.85131
Rheumatoid arthritis	1.85131
Butanoate metabolism	1.79433
Metabolism of xenobiotics by cytochrome P450	1.79101
Drug metabolism - cytochrome P450	1.77143
Axon guidance	1.76906
Synthesis and degradation of ketone bodies	1.68011
Ubiquinone and other terpenoid-quinone biosynthesis	1.68011
Neuroactive ligand-receptor interaction	1.65934
Synaptic vesicle cycle	1.64606
Alanine, aspartate and glutamate metabolism	1.63445
Pancreatic cancer	1.57586
Bladder cancer	1.49509
Pertussis	1.46679
p53 signaling pathway	1.40561
Protein processing in endoplasmic reticulum	1.37222
B cell receptor signaling pathway	1.32849
Bacterial invasion of epithelial cells	1.32849

## Sheet: downregulated pathway—(-LgP)
path_name	(-LgP)
Metabolic pathways	6.9126
Olfactory transduction	4.50909
Hepatitis C	3.92421
Endocytosis	3.77717
Transcriptional misregulation in cancer	3.47909
Phosphatidylinositol signaling system	2.66779
Cell cycle	2.4037
Influenza A	2.17671
Hepatitis B	2.08723
Renin-angiotensin system	2.01791
Viral carcinogenesis	1.91588
Alzheimer's disease	1.67455
Herpes simplex infection	1.6274
MAPK signaling pathway	1.62584
Ubiquitin mediated proteolysis	1.55704
Measles	1.49777
Spliceosome	1.4833
Inositol phosphate metabolism	1.42273
