# Supplementary material for: Integrative microRNA-gene expression network analysis in genetic hypercalciuric stone-forming rat kidney
Source: PeerJ. 2016 Mar 31;4:e1884. doi: 10.7717/peerj.1884 (PMC4824905; doi:10.7717/peerj.1884)
Supplement: Table S10 — The subset of differentially expressed genes that were both members of significantly enriched GO and KEGG pathway entries. [file peerj-04-1884-s010.xlsx]

## Sheet: intersection genes 
go_id	go_name	gene_id	gene_name	style	path_id	path_name
GO:0045893	positive regulation of transcription, DNA-dependent	25124	Stat1	down	05160	Hepatitis C
GO:0045893	positive regulation of transcription, DNA-dependent	25124	Stat1	down	05164	Influenza A
GO:0045893	positive regulation of transcription, DNA-dependent	25124	Stat1	down	05161	Hepatitis B
GO:0045893	positive regulation of transcription, DNA-dependent	25124	Stat1	down	05168	Herpes simplex infection
GO:0045893	positive regulation of transcription, DNA-dependent	25124	Stat1	down	05162	Measles
GO:0045893	positive regulation of transcription, DNA-dependent	362339	Creb3l2	down	05161	Hepatitis B
GO:0045893	positive regulation of transcription, DNA-dependent	362339	Creb3l2	down	05203	Viral carcinogenesis
GO:0045893	positive regulation of transcription, DNA-dependent	499497	Mef2c	down	05202	Transcriptional misregulation in cancer
GO:0045893	positive regulation of transcription, DNA-dependent	499497	Mef2c	down	04010	MAPK signaling pathway
GO:0045893	positive regulation of transcription, DNA-dependent	25313	Egf	down	05160	Hepatitis C
GO:0045893	positive regulation of transcription, DNA-dependent	25313	Egf	down	04144	Endocytosis
GO:0045893	positive regulation of transcription, DNA-dependent	25313	Egf	down	04010	MAPK signaling pathway
GO:0045892	negative regulation of transcription, DNA-dependent	84350	Dnmt1	down	01100	Metabolic pathways
GO:0045892	negative regulation of transcription, DNA-dependent	297930	Wwp1	down	04144	Endocytosis
GO:0045892	negative regulation of transcription, DNA-dependent	297930	Wwp1	down	04120	Ubiquitin mediated proteolysis
GO:0045892	negative regulation of transcription, DNA-dependent	84582	Hdac7	down	05203	Viral carcinogenesis
GO:0045892	negative regulation of transcription, DNA-dependent	314384	Rps6ka5	down	04010	MAPK signaling pathway
GO:0045892	negative regulation of transcription, DNA-dependent	363067	Sin3a	down	05202	Transcriptional misregulation in cancer
GO:0045892	negative regulation of transcription, DNA-dependent	83571	Cdkn1b	down	05202	Transcriptional misregulation in cancer
GO:0045892	negative regulation of transcription, DNA-dependent	83571	Cdkn1b	down	04110	Cell cycle
GO:0045892	negative regulation of transcription, DNA-dependent	83571	Cdkn1b	down	05161	Hepatitis B
GO:0045892	negative regulation of transcription, DNA-dependent	83571	Cdkn1b	down	05203	Viral carcinogenesis
GO:0045892	negative regulation of transcription, DNA-dependent	83571	Cdkn1b	down	05162	Measles
GO:0045892	negative regulation of transcription, DNA-dependent	294924	Mecom	down	04010	MAPK signaling pathway
GO:0016568	chromatin modification	680537	Whsc1	down	05202	Transcriptional misregulation in cancer
GO:0016568	chromatin modification	84582	Hdac7	down	05203	Viral carcinogenesis
GO:0016568	chromatin modification	84350	Dnmt1	down	01100	Metabolic pathways
GO:0016568	chromatin modification	81758	Rbl2	down	04110	Cell cycle
GO:0016568	chromatin modification	81758	Rbl2	down	05203	Viral carcinogenesis
GO:0043065	positive regulation of apoptotic process	25309	Cycs	down	05164	Influenza A
GO:0043065	positive regulation of apoptotic process	25309	Cycs	down	05161	Hepatitis B
GO:0043065	positive regulation of apoptotic process	25309	Cycs	down	05010	Alzheimer's disease
GO:0043065	positive regulation of apoptotic process	25309	Cycs	down	05168	Herpes simplex infection
GO:0043065	positive regulation of apoptotic process	24310	Ace	down	04614	Renin-angiotensin system
GO:0043065	positive regulation of apoptotic process	300711	Atm	down	05202	Transcriptional misregulation in cancer
GO:0043065	positive regulation of apoptotic process	300711	Atm	down	04110	Cell cycle
GO:0043065	positive regulation of apoptotic process	364594	Tlr3	down	05160	Hepatitis C
GO:0043065	positive regulation of apoptotic process	364594	Tlr3	down	05164	Influenza A
GO:0043065	positive regulation of apoptotic process	364594	Tlr3	down	05161	Hepatitis B
GO:0043065	positive regulation of apoptotic process	364594	Tlr3	down	05168	Herpes simplex infection
GO:0008150	biological_process	360592	Trim37	down	04120	Ubiquitin mediated proteolysis
GO:0008150	biological_process	116699	Inpp4b	down	01100	Metabolic pathways
GO:0008150	biological_process	116699	Inpp4b	down	04070	Phosphatidylinositol signaling system
GO:0008150	biological_process	116699	Inpp4b	down	00562	Inositol phosphate metabolism
GO:0008150	biological_process	60357	Prom1	down	05202	Transcriptional misregulation in cancer
GO:0008150	biological_process	313264	Trim32	down	04120	Ubiquitin mediated proteolysis
GO:0008150	biological_process	362176	Lmo2	down	05202	Transcriptional misregulation in cancer
GO:0008150	biological_process	680537	Whsc1	down	05202	Transcriptional misregulation in cancer
GO:0008150	biological_process	310903	Adh6	down	01100	Metabolic pathways
GO:0008150	biological_process	362788	Traf3	down	05160	Hepatitis C
GO:0008150	biological_process	362788	Traf3	down	05203	Viral carcinogenesis
GO:0008150	biological_process	362788	Traf3	down	05168	Herpes simplex infection
GO:0008150	biological_process	313231	Alg2	down	01100	Metabolic pathways
GO:0016572	histone phosphorylation	25579	Map3k12	down	04010	MAPK signaling pathway
GO:0016572	histone phosphorylation	300711	Atm	down	05202	Transcriptional misregulation in cancer
GO:0016572	histone phosphorylation	300711	Atm	down	04110	Cell cycle
GO:0016572	histone phosphorylation	314384	Rps6ka5	down	04010	MAPK signaling pathway
GO:0045944	positive regulation of transcription from RNA polymerase II promoter	303991	Hoxd10	down	05202	Transcriptional misregulation in cancer
GO:0045944	positive regulation of transcription from RNA polymerase II promoter	364594	Tlr3	down	05160	Hepatitis C
GO:0045944	positive regulation of transcription from RNA polymerase II promoter	364594	Tlr3	down	05164	Influenza A
GO:0045944	positive regulation of transcription from RNA polymerase II promoter	364594	Tlr3	down	05161	Hepatitis B
GO:0045944	positive regulation of transcription from RNA polymerase II promoter	364594	Tlr3	down	05168	Herpes simplex infection
GO:0045944	positive regulation of transcription from RNA polymerase II promoter	311430	Mavs	down	05160	Hepatitis C
GO:0045944	positive regulation of transcription from RNA polymerase II promoter	311430	Mavs	down	05164	Influenza A
GO:0045944	positive regulation of transcription from RNA polymerase II promoter	311430	Mavs	down	05161	Hepatitis B
GO:0045944	positive regulation of transcription from RNA polymerase II promoter	311430	Mavs	down	05168	Herpes simplex infection
GO:0045944	positive regulation of transcription from RNA polymerase II promoter	311430	Mavs	down	05162	Measles
GO:0045944	positive regulation of transcription from RNA polymerase II promoter	25124	Stat1	down	05160	Hepatitis C
GO:0045944	positive regulation of transcription from RNA polymerase II promoter	25124	Stat1	down	05164	Influenza A
GO:0045944	positive regulation of transcription from RNA polymerase II promoter	25124	Stat1	down	05161	Hepatitis B
GO:0045944	positive regulation of transcription from RNA polymerase II promoter	25124	Stat1	down	05168	Herpes simplex infection
GO:0045944	positive regulation of transcription from RNA polymerase II promoter	25124	Stat1	down	05162	Measles
GO:0045944	positive regulation of transcription from RNA polymerase II promoter	363067	Sin3a	down	05202	Transcriptional misregulation in cancer
GO:0045944	positive regulation of transcription from RNA polymerase II promoter	314384	Rps6ka5	down	04010	MAPK signaling pathway
GO:0045944	positive regulation of transcription from RNA polymerase II promoter	362176	Lmo2	down	05202	Transcriptional misregulation in cancer
GO:0045944	positive regulation of transcription from RNA polymerase II promoter	294924	Mecom	down	04010	MAPK signaling pathway
GO:0045944	positive regulation of transcription from RNA polymerase II promoter	499497	Mef2c	down	05202	Transcriptional misregulation in cancer
GO:0045944	positive regulation of transcription from RNA polymerase II promoter	499497	Mef2c	down	04010	MAPK signaling pathway
GO:0006355	regulation of transcription, DNA-dependent	314384	Rps6ka5	down	04010	MAPK signaling pathway
GO:0006355	regulation of transcription, DNA-dependent	686117	Meis1	down	05202	Transcriptional misregulation in cancer
GO:0006355	regulation of transcription, DNA-dependent	363067	Sin3a	down	05202	Transcriptional misregulation in cancer
GO:0006355	regulation of transcription, DNA-dependent	81758	Rbl2	down	04110	Cell cycle
GO:0006355	regulation of transcription, DNA-dependent	81758	Rbl2	down	05203	Viral carcinogenesis
GO:0006355	regulation of transcription, DNA-dependent	25124	Stat1	down	05160	Hepatitis C
GO:0006355	regulation of transcription, DNA-dependent	25124	Stat1	down	05164	Influenza A
GO:0006355	regulation of transcription, DNA-dependent	25124	Stat1	down	05161	Hepatitis B
GO:0006355	regulation of transcription, DNA-dependent	25124	Stat1	down	05168	Herpes simplex infection
GO:0006355	regulation of transcription, DNA-dependent	25124	Stat1	down	05162	Measles
GO:0006355	regulation of transcription, DNA-dependent	84350	Dnmt1	down	01100	Metabolic pathways
GO:0006355	regulation of transcription, DNA-dependent	300947	Tfdp2	down	04110	Cell cycle
GO:0006355	regulation of transcription, DNA-dependent	499497	Mef2c	down	05202	Transcriptional misregulation in cancer
GO:0006355	regulation of transcription, DNA-dependent	499497	Mef2c	down	04010	MAPK signaling pathway
GO:0001525	angiogenesis	686117	Meis1	down	05202	Transcriptional misregulation in cancer
GO:0001525	angiogenesis	25444	Fgf9	down	04010	MAPK signaling pathway
GO:0001525	angiogenesis	25313	Egf	down	05160	Hepatitis C
GO:0001525	angiogenesis	25313	Egf	down	04144	Endocytosis
GO:0001525	angiogenesis	25313	Egf	down	04010	MAPK signaling pathway
GO:0001525	angiogenesis	81641	Anpep	down	01100	Metabolic pathways
GO:0001525	angiogenesis	81641	Anpep	down	04614	Renin-angiotensin system
GO:0001525	angiogenesis	25619	Plau	down	05202	Transcriptional misregulation in cancer
GO:0008284	positive regulation of cell proliferation	25619	Plau	down	05202	Transcriptional misregulation in cancer
GO:0008284	positive regulation of cell proliferation	25124	Stat1	down	05160	Hepatitis C
GO:0008284	positive regulation of cell proliferation	25124	Stat1	down	05164	Influenza A
GO:0008284	positive regulation of cell proliferation	25124	Stat1	down	05161	Hepatitis B
GO:0008284	positive regulation of cell proliferation	25124	Stat1	down	05168	Herpes simplex infection
GO:0008284	positive regulation of cell proliferation	25124	Stat1	down	05162	Measles
GO:0008284	positive regulation of cell proliferation	83571	Cdkn1b	down	05202	Transcriptional misregulation in cancer
GO:0008284	positive regulation of cell proliferation	83571	Cdkn1b	down	04110	Cell cycle
GO:0008284	positive regulation of cell proliferation	83571	Cdkn1b	down	05161	Hepatitis B
GO:0008284	positive regulation of cell proliferation	83571	Cdkn1b	down	05203	Viral carcinogenesis
GO:0008284	positive regulation of cell proliferation	83571	Cdkn1b	down	05162	Measles
GO:0008284	positive regulation of cell proliferation	25444	Fgf9	down	04010	MAPK signaling pathway
GO:0008284	positive regulation of cell proliferation	25313	Egf	down	05160	Hepatitis C
GO:0008284	positive regulation of cell proliferation	25313	Egf	down	04144	Endocytosis
GO:0008284	positive regulation of cell proliferation	25313	Egf	down	04010	MAPK signaling pathway
GO:0008284	positive regulation of cell proliferation	29650	Adam10	down	05010	Alzheimer's disease
GO:0006950	response to stress	314384	Rps6ka5	down	04010	MAPK signaling pathway
GO:0006950	response to stress	60460	Hspa2	down	04144	Endocytosis
GO:0006950	response to stress	60460	Hspa2	down	05164	Influenza A
GO:0006950	response to stress	60460	Hspa2	down	04010	MAPK signaling pathway
GO:0006950	response to stress	60460	Hspa2	down	05162	Measles
GO:0006950	response to stress	60460	Hspa2	down	03040	Spliceosome
GO:0006950	response to stress	83571	Cdkn1b	down	05202	Transcriptional misregulation in cancer
GO:0006950	response to stress	83571	Cdkn1b	down	04110	Cell cycle
GO:0006950	response to stress	83571	Cdkn1b	down	05161	Hepatitis B
GO:0006950	response to stress	83571	Cdkn1b	down	05203	Viral carcinogenesis
GO:0006950	response to stress	83571	Cdkn1b	down	05162	Measles
GO:0006950	response to stress	81638	Agtr1b	down	04614	Renin-angiotensin system
GO:0006915	apoptotic process	25309	Cycs	down	05164	Influenza A
GO:0006915	apoptotic process	25309	Cycs	down	05161	Hepatitis B
GO:0006915	apoptotic process	25309	Cycs	down	05010	Alzheimer's disease
GO:0006915	apoptotic process	25309	Cycs	down	05168	Herpes simplex infection
GO:0006915	apoptotic process	300711	Atm	down	05202	Transcriptional misregulation in cancer
GO:0006915	apoptotic process	300711	Atm	down	04110	Cell cycle
GO:0007165	signal transduction	81747	Pi4kb	down	01100	Metabolic pathways
GO:0007165	signal transduction	81747	Pi4kb	down	04070	Phosphatidylinositol signaling system
GO:0007165	signal transduction	81747	Pi4kb	down	00562	Inositol phosphate metabolism
GO:0007165	signal transduction	81638	Agtr1b	down	04614	Renin-angiotensin system
GO:0007165	signal transduction	25372	Adrbk2	down	04740	Olfactory transduction
GO:0007165	signal transduction	25372	Adrbk2	down	04144	Endocytosis
GO:0007165	signal transduction	311430	Mavs	down	05160	Hepatitis C
GO:0007165	signal transduction	311430	Mavs	down	05164	Influenza A
GO:0007165	signal transduction	311430	Mavs	down	05161	Hepatitis B
GO:0007165	signal transduction	311430	Mavs	down	05168	Herpes simplex infection
GO:0007165	signal transduction	311430	Mavs	down	05162	Measles
GO:0043066	negative regulation of apoptotic process	29219	Snca	down	05010	Alzheimer's disease
GO:0043066	negative regulation of apoptotic process	499497	Mef2c	down	05202	Transcriptional misregulation in cancer
GO:0043066	negative regulation of apoptotic process	499497	Mef2c	down	04010	MAPK signaling pathway
GO:0043066	negative regulation of apoptotic process	367100	Smad6	down	04144	Endocytosis
GO:0043066	negative regulation of apoptotic process	29240	Polb	down	05203	Viral carcinogenesis
GO:0043066	negative regulation of apoptotic process	300711	Atm	down	05202	Transcriptional misregulation in cancer
GO:0043066	negative regulation of apoptotic process	300711	Atm	down	04110	Cell cycle
GO:0043066	negative regulation of apoptotic process	83571	Cdkn1b	down	05202	Transcriptional misregulation in cancer
GO:0043066	negative regulation of apoptotic process	83571	Cdkn1b	down	04110	Cell cycle
GO:0043066	negative regulation of apoptotic process	83571	Cdkn1b	down	05161	Hepatitis B
GO:0043066	negative regulation of apoptotic process	83571	Cdkn1b	down	05203	Viral carcinogenesis
GO:0043066	negative regulation of apoptotic process	83571	Cdkn1b	down	05162	Measles
GO:0043066	negative regulation of apoptotic process	313264	Trim32	down	04120	Ubiquitin mediated proteolysis
GO:0043066	negative regulation of apoptotic process	363067	Sin3a	down	05202	Transcriptional misregulation in cancer
GO:0001666	response to hypoxia	81638	Agtr1b	down	04614	Renin-angiotensin system
GO:0001666	response to hypoxia	24310	Ace	down	04614	Renin-angiotensin system
GO:0001666	response to hypoxia	83571	Cdkn1b	down	05202	Transcriptional misregulation in cancer
GO:0001666	response to hypoxia	83571	Cdkn1b	down	04110	Cell cycle
GO:0001666	response to hypoxia	83571	Cdkn1b	down	05161	Hepatitis B
GO:0001666	response to hypoxia	83571	Cdkn1b	down	05203	Viral carcinogenesis
GO:0001666	response to hypoxia	83571	Cdkn1b	down	05162	Measles
GO:0001666	response to hypoxia	300711	Atm	down	05202	Transcriptional misregulation in cancer
GO:0001666	response to hypoxia	300711	Atm	down	04110	Cell cycle
GO:0001666	response to hypoxia	81678	Itpr2	down	04070	Phosphatidylinositol signaling system
GO:0001666	response to hypoxia	81678	Itpr2	down	05010	Alzheimer's disease
GO:0001666	response to hypoxia	64678	Tfrc	down	04144	Endocytosis
GO:0001666	response to hypoxia	25619	Plau	down	05202	Transcriptional misregulation in cancer
GO:0009952	anterior/posterior pattern specification	303991	Hoxd10	down	05202	Transcriptional misregulation in cancer
GO:0030326	embryonic limb morphogenesis	25444	Fgf9	down	04010	MAPK signaling pathway
GO:0030326	embryonic limb morphogenesis	303991	Hoxd10	down	05202	Transcriptional misregulation in cancer
GO:0051092	positive regulation of NF-kappaB transcription factor activity	116725	Ube2n	down	04120	Ubiquitin mediated proteolysis
GO:0051092	positive regulation of NF-kappaB transcription factor activity	313264	Trim32	down	04120	Ubiquitin mediated proteolysis
GO:0051092	positive regulation of NF-kappaB transcription factor activity	364594	Tlr3	down	05160	Hepatitis C
GO:0051092	positive regulation of NF-kappaB transcription factor activity	364594	Tlr3	down	05164	Influenza A
GO:0051092	positive regulation of NF-kappaB transcription factor activity	364594	Tlr3	down	05161	Hepatitis B
GO:0051092	positive regulation of NF-kappaB transcription factor activity	364594	Tlr3	down	05168	Herpes simplex infection
GO:0051092	positive regulation of NF-kappaB transcription factor activity	314384	Rps6ka5	down	04010	MAPK signaling pathway
GO:0090190	positive regulation of branching involved in ureteric bud morphogenesis	81638	Agtr1b	down	04614	Renin-angiotensin system
GO:0006468	protein phosphorylation	29702	Eif2ak3	down	05160	Hepatitis C
GO:0006468	protein phosphorylation	29702	Eif2ak3	down	05164	Influenza A
GO:0006468	protein phosphorylation	29702	Eif2ak3	down	05010	Alzheimer's disease
GO:0006468	protein phosphorylation	29702	Eif2ak3	down	05168	Herpes simplex infection
GO:0006468	protein phosphorylation	29702	Eif2ak3	down	05162	Measles
GO:0006468	protein phosphorylation	29650	Adam10	down	05010	Alzheimer's disease
GO:0006468	protein phosphorylation	314384	Rps6ka5	down	04010	MAPK signaling pathway
GO:0006468	protein phosphorylation	25579	Map3k12	down	04010	MAPK signaling pathway
GO:0006468	protein phosphorylation	300711	Atm	down	05202	Transcriptional misregulation in cancer
GO:0006468	protein phosphorylation	300711	Atm	down	04110	Cell cycle
GO:0006468	protein phosphorylation	25372	Adrbk2	down	04740	Olfactory transduction
GO:0006468	protein phosphorylation	25372	Adrbk2	down	04144	Endocytosis
GO:0002218	activation of innate immune response	311430	Mavs	down	05160	Hepatitis C
GO:0002218	activation of innate immune response	311430	Mavs	down	05164	Influenza A
GO:0002218	activation of innate immune response	311430	Mavs	down	05161	Hepatitis B
GO:0002218	activation of innate immune response	311430	Mavs	down	05168	Herpes simplex infection
GO:0002218	activation of innate immune response	311430	Mavs	down	05162	Measles
GO:0002218	activation of innate immune response	363067	Sin3a	down	05202	Transcriptional misregulation in cancer
GO:0014898	cardiac muscle hypertrophy in response to stress	499497	Mef2c	down	05202	Transcriptional misregulation in cancer
GO:0014898	cardiac muscle hypertrophy in response to stress	499497	Mef2c	down	04010	MAPK signaling pathway
GO:0032055	negative regulation of translation in response to stress	29702	Eif2ak3	down	05160	Hepatitis C
GO:0032055	negative regulation of translation in response to stress	29702	Eif2ak3	down	05164	Influenza A
GO:0032055	negative regulation of translation in response to stress	29702	Eif2ak3	down	05010	Alzheimer's disease
GO:0032055	negative regulation of translation in response to stress	29702	Eif2ak3	down	05168	Herpes simplex infection
GO:0032055	negative regulation of translation in response to stress	29702	Eif2ak3	down	05162	Measles
GO:0006351	transcription, DNA-dependent	84582	Hdac7	down	05203	Viral carcinogenesis
GO:0006351	transcription, DNA-dependent	367100	Smad6	down	04144	Endocytosis
GO:0006351	transcription, DNA-dependent	81758	Rbl2	down	04110	Cell cycle
GO:0006351	transcription, DNA-dependent	81758	Rbl2	down	05203	Viral carcinogenesis
GO:0006351	transcription, DNA-dependent	362339	Creb3l2	down	05161	Hepatitis B
GO:0006351	transcription, DNA-dependent	362339	Creb3l2	down	05203	Viral carcinogenesis
GO:0006351	transcription, DNA-dependent	300947	Tfdp2	down	04110	Cell cycle
GO:0006351	transcription, DNA-dependent	84350	Dnmt1	down	01100	Metabolic pathways
GO:0006351	transcription, DNA-dependent	25124	Stat1	down	05160	Hepatitis C
GO:0006351	transcription, DNA-dependent	25124	Stat1	down	05164	Influenza A
GO:0006351	transcription, DNA-dependent	25124	Stat1	down	05161	Hepatitis B
GO:0006351	transcription, DNA-dependent	25124	Stat1	down	05168	Herpes simplex infection
GO:0006351	transcription, DNA-dependent	25124	Stat1	down	05162	Measles
GO:0035556	intracellular signal transduction	81821	Dgkz	down	01100	Metabolic pathways
GO:0035556	intracellular signal transduction	81821	Dgkz	down	04070	Phosphatidylinositol signaling system
GO:0071333	cellular response to glucose stimulus	25619	Plau	down	05202	Transcriptional misregulation in cancer
GO:0071333	cellular response to glucose stimulus	363067	Sin3a	down	05202	Transcriptional misregulation in cancer
GO:0071333	cellular response to glucose stimulus	499497	Mef2c	down	05202	Transcriptional misregulation in cancer
GO:0071333	cellular response to glucose stimulus	499497	Mef2c	down	04010	MAPK signaling pathway
GO:0007420	brain development	171566	Nme7	down	01100	Metabolic pathways
GO:0007420	brain development	499529	Ndufs4	down	01100	Metabolic pathways
GO:0007420	brain development	499529	Ndufs4	down	05010	Alzheimer's disease
GO:0007420	brain development	300711	Atm	down	05202	Transcriptional misregulation in cancer
GO:0007420	brain development	300711	Atm	down	04110	Cell cycle
GO:0048703	embryonic viscerocranium morphogenesis	29633	Ndst1	down	01100	Metabolic pathways
GO:0048703	embryonic viscerocranium morphogenesis	499497	Mef2c	down	05202	Transcriptional misregulation in cancer
GO:0048703	embryonic viscerocranium morphogenesis	499497	Mef2c	down	04010	MAPK signaling pathway
GO:0006511	ubiquitin-dependent protein catabolic process	116725	Ube2n	down	04120	Ubiquitin mediated proteolysis
GO:0006511	ubiquitin-dependent protein catabolic process	310363	Fbxo4	down	04120	Ubiquitin mediated proteolysis
GO:0010842	retina layer formation	60357	Prom1	down	05202	Transcriptional misregulation in cancer
GO:0032781	positive regulation of ATPase activity	25106	Rgn	down	01100	Metabolic pathways
GO:0001501	skeletal system development	303991	Hoxd10	down	05202	Transcriptional misregulation in cancer
GO:0001501	skeletal system development	29702	Eif2ak3	down	05160	Hepatitis C
GO:0001501	skeletal system development	29702	Eif2ak3	down	05164	Influenza A
GO:0001501	skeletal system development	29702	Eif2ak3	down	05010	Alzheimer's disease
GO:0001501	skeletal system development	29702	Eif2ak3	down	05168	Herpes simplex infection
GO:0001501	skeletal system development	29702	Eif2ak3	down	05162	Measles
GO:0031937	positive regulation of chromatin silencing	363067	Sin3a	down	05202	Transcriptional misregulation in cancer
GO:0043550	regulation of lipid kinase activity	680111	Rbl1	down	04110	Cell cycle
GO:0043550	regulation of lipid kinase activity	680111	Rbl1	down	05203	Viral carcinogenesis
GO:0043550	regulation of lipid kinase activity	81758	Rbl2	down	04110	Cell cycle
GO:0043550	regulation of lipid kinase activity	81758	Rbl2	down	05203	Viral carcinogenesis
GO:2000768	positive regulation of nephron tubule epithelial cell differentiation	60357	Prom1	down	05202	Transcriptional misregulation in cancer
GO:0048488	synaptic vesicle endocytosis	116743	Sh3gl2	down	04144	Endocytosis
GO:0048488	synaptic vesicle endocytosis	29219	Snca	down	05010	Alzheimer's disease
GO:0000122	negative regulation of transcription from RNA polymerase II promoter	84582	Hdac7	down	05203	Viral carcinogenesis
GO:0000122	negative regulation of transcription from RNA polymerase II promoter	84350	Dnmt1	down	01100	Metabolic pathways
GO:0000122	negative regulation of transcription from RNA polymerase II promoter	499497	Mef2c	down	05202	Transcriptional misregulation in cancer
GO:0000122	negative regulation of transcription from RNA polymerase II promoter	499497	Mef2c	down	04010	MAPK signaling pathway
GO:0000122	negative regulation of transcription from RNA polymerase II promoter	680111	Rbl1	down	04110	Cell cycle
GO:0000122	negative regulation of transcription from RNA polymerase II promoter	680111	Rbl1	down	05203	Viral carcinogenesis
GO:0000122	negative regulation of transcription from RNA polymerase II promoter	680537	Whsc1	down	05202	Transcriptional misregulation in cancer
GO:0000122	negative regulation of transcription from RNA polymerase II promoter	363067	Sin3a	down	05202	Transcriptional misregulation in cancer
GO:0030154	cell differentiation	81641	Anpep	down	01100	Metabolic pathways
GO:0030154	cell differentiation	81641	Anpep	down	04614	Renin-angiotensin system
GO:0016567	protein ubiquitination	310363	Fbxo4	down	04120	Ubiquitin mediated proteolysis
GO:0016567	protein ubiquitination	313264	Trim32	down	04120	Ubiquitin mediated proteolysis
GO:0016567	protein ubiquitination	116725	Ube2n	down	04120	Ubiquitin mediated proteolysis
GO:0016567	protein ubiquitination	297930	Wwp1	down	04144	Endocytosis
GO:0016567	protein ubiquitination	297930	Wwp1	down	04120	Ubiquitin mediated proteolysis
GO:0006974	response to DNA damage stimulus	29240	Polb	down	05203	Viral carcinogenesis
GO:0006974	response to DNA damage stimulus	300711	Atm	down	05202	Transcriptional misregulation in cancer
GO:0006974	response to DNA damage stimulus	300711	Atm	down	04110	Cell cycle
GO:0006816	calcium ion transport	116600	Cacnb2	down	04010	MAPK signaling pathway
GO:0006816	calcium ion transport	81678	Itpr2	down	04070	Phosphatidylinositol signaling system
GO:0006816	calcium ion transport	81678	Itpr2	down	05010	Alzheimer's disease
GO:0002062	chondrocyte differentiation	499497	Mef2c	down	05202	Transcriptional misregulation in cancer
GO:0002062	chondrocyte differentiation	499497	Mef2c	down	04010	MAPK signaling pathway
GO:0002062	chondrocyte differentiation	25444	Fgf9	down	04010	MAPK signaling pathway
GO:0002062	chondrocyte differentiation	362339	Creb3l2	down	05161	Hepatitis B
GO:0002062	chondrocyte differentiation	362339	Creb3l2	down	05203	Viral carcinogenesis
GO:0014910	regulation of smooth muscle cell migration	25619	Plau	down	05202	Transcriptional misregulation in cancer
GO:0014910	regulation of smooth muscle cell migration	24310	Ace	down	04614	Renin-angiotensin system
GO:0045732	positive regulation of protein catabolic process	361467	Lpcat1	down	01100	Metabolic pathways
GO:0045732	positive regulation of protein catabolic process	83571	Cdkn1b	down	05202	Transcriptional misregulation in cancer
GO:0045732	positive regulation of protein catabolic process	83571	Cdkn1b	down	04110	Cell cycle
GO:0045732	positive regulation of protein catabolic process	83571	Cdkn1b	down	05161	Hepatitis B
GO:0045732	positive regulation of protein catabolic process	83571	Cdkn1b	down	05203	Viral carcinogenesis
GO:0045732	positive regulation of protein catabolic process	83571	Cdkn1b	down	05162	Measles
GO:0045732	positive regulation of protein catabolic process	313264	Trim32	down	04120	Ubiquitin mediated proteolysis
GO:0045930	negative regulation of mitotic cell cycle	83571	Cdkn1b	down	05202	Transcriptional misregulation in cancer
GO:0045930	negative regulation of mitotic cell cycle	83571	Cdkn1b	down	04110	Cell cycle
GO:0045930	negative regulation of mitotic cell cycle	83571	Cdkn1b	down	05161	Hepatitis B
GO:0045930	negative regulation of mitotic cell cycle	83571	Cdkn1b	down	05203	Viral carcinogenesis
GO:0045930	negative regulation of mitotic cell cycle	83571	Cdkn1b	down	05162	Measles
GO:0045930	negative regulation of mitotic cell cycle	81821	Dgkz	down	01100	Metabolic pathways
GO:0045930	negative regulation of mitotic cell cycle	81821	Dgkz	down	04070	Phosphatidylinositol signaling system
GO:0006917	induction of apoptosis	25124	Stat1	down	05160	Hepatitis C
GO:0006917	induction of apoptosis	25124	Stat1	down	05164	Influenza A
GO:0006917	induction of apoptosis	25124	Stat1	down	05161	Hepatitis B
GO:0006917	induction of apoptosis	25124	Stat1	down	05168	Herpes simplex infection
GO:0006917	induction of apoptosis	25124	Stat1	down	05162	Measles
GO:0006917	induction of apoptosis	83571	Cdkn1b	down	05202	Transcriptional misregulation in cancer
GO:0006917	induction of apoptosis	83571	Cdkn1b	down	04110	Cell cycle
GO:0006917	induction of apoptosis	83571	Cdkn1b	down	05161	Hepatitis B
GO:0006917	induction of apoptosis	83571	Cdkn1b	down	05203	Viral carcinogenesis
GO:0006917	induction of apoptosis	83571	Cdkn1b	down	05162	Measles
GO:0000729	DNA double-strand break processing	116725	Ube2n	down	04120	Ubiquitin mediated proteolysis
GO:0003211	cardiac ventricle formation	499497	Mef2c	down	05202	Transcriptional misregulation in cancer
GO:0003211	cardiac ventricle formation	499497	Mef2c	down	04010	MAPK signaling pathway
GO:0003289	atrial septum primum morphogenesis	680537	Whsc1	down	05202	Transcriptional misregulation in cancer
GO:0010216	maintenance of DNA methylation	84350	Dnmt1	down	01100	Metabolic pathways
GO:0016125	sterol metabolic process	81681	Lss	down	01100	Metabolic pathways
GO:0032481	positive regulation of type I interferon production	364594	Tlr3	down	05160	Hepatitis C
GO:0032481	positive regulation of type I interferon production	364594	Tlr3	down	05164	Influenza A
GO:0032481	positive regulation of type I interferon production	364594	Tlr3	down	05161	Hepatitis B
GO:0032481	positive regulation of type I interferon production	364594	Tlr3	down	05168	Herpes simplex infection
GO:0032481	positive regulation of type I interferon production	311430	Mavs	down	05160	Hepatitis C
GO:0032481	positive regulation of type I interferon production	311430	Mavs	down	05164	Influenza A
GO:0032481	positive regulation of type I interferon production	311430	Mavs	down	05161	Hepatitis B
GO:0032481	positive regulation of type I interferon production	311430	Mavs	down	05168	Herpes simplex infection
GO:0032481	positive regulation of type I interferon production	311430	Mavs	down	05162	Measles
GO:0043542	endothelial cell migration	25124	Stat1	down	05160	Hepatitis C
GO:0043542	endothelial cell migration	25124	Stat1	down	05164	Influenza A
GO:0043542	endothelial cell migration	25124	Stat1	down	05161	Hepatitis B
GO:0043542	endothelial cell migration	25124	Stat1	down	05168	Herpes simplex infection
GO:0043542	endothelial cell migration	25124	Stat1	down	05162	Measles
GO:0060045	positive regulation of cardiac muscle cell proliferation	499497	Mef2c	down	05202	Transcriptional misregulation in cancer
GO:0060045	positive regulation of cardiac muscle cell proliferation	499497	Mef2c	down	04010	MAPK signaling pathway
GO:0060045	positive regulation of cardiac muscle cell proliferation	25444	Fgf9	down	04010	MAPK signaling pathway
GO:0042127	regulation of cell proliferation	84350	Dnmt1	down	01100	Metabolic pathways
GO:0042127	regulation of cell proliferation	294924	Mecom	down	04010	MAPK signaling pathway
GO:0042127	regulation of cell proliferation	25619	Plau	down	05202	Transcriptional misregulation in cancer
GO:0030308	negative regulation of cell growth	58964	Nme6	down	01100	Metabolic pathways
GO:0030308	negative regulation of cell growth	83571	Cdkn1b	down	05202	Transcriptional misregulation in cancer
GO:0030308	negative regulation of cell growth	83571	Cdkn1b	down	04110	Cell cycle
GO:0030308	negative regulation of cell growth	83571	Cdkn1b	down	05161	Hepatitis B
GO:0030308	negative regulation of cell growth	83571	Cdkn1b	down	05203	Viral carcinogenesis
GO:0030308	negative regulation of cell growth	83571	Cdkn1b	down	05162	Measles
GO:0006281	DNA repair	300711	Atm	down	05202	Transcriptional misregulation in cancer
GO:0006281	DNA repair	300711	Atm	down	04110	Cell cycle
GO:0006281	DNA repair	116725	Ube2n	down	04120	Ubiquitin mediated proteolysis
GO:0044344	cellular response to fibroblast growth factor stimulus	29219	Snca	down	05010	Alzheimer's disease
GO:0010628	positive regulation of gene expression	25444	Fgf9	down	04010	MAPK signaling pathway
GO:0010628	positive regulation of gene expression	84350	Dnmt1	down	01100	Metabolic pathways
GO:0010628	positive regulation of gene expression	499497	Mef2c	down	05202	Transcriptional misregulation in cancer
GO:0010628	positive regulation of gene expression	499497	Mef2c	down	04010	MAPK signaling pathway
GO:0003139	secondary heart field specification	499497	Mef2c	down	05202	Transcriptional misregulation in cancer
GO:0003139	secondary heart field specification	499497	Mef2c	down	04010	MAPK signaling pathway
GO:0008635	activation of cysteine-type endopeptidase activity involved in apoptotic process by cytochrome c	25309	Cycs	down	05164	Influenza A
GO:0008635	activation of cysteine-type endopeptidase activity involved in apoptotic process by cytochrome c	25309	Cycs	down	05161	Hepatitis B
GO:0008635	activation of cysteine-type endopeptidase activity involved in apoptotic process by cytochrome c	25309	Cycs	down	05010	Alzheimer's disease
GO:0008635	activation of cysteine-type endopeptidase activity involved in apoptotic process by cytochrome c	25309	Cycs	down	05168	Herpes simplex infection
GO:0009605	response to external stimulus	294924	Mecom	down	04010	MAPK signaling pathway
GO:0009605	response to external stimulus	314384	Rps6ka5	down	04010	MAPK signaling pathway
GO:0014033	neural crest cell differentiation	499497	Mef2c	down	05202	Transcriptional misregulation in cancer
GO:0014033	neural crest cell differentiation	499497	Mef2c	down	04010	MAPK signaling pathway
GO:0046822	regulation of nucleocytoplasmic transport	116699	Inpp4b	down	01100	Metabolic pathways
GO:0046822	regulation of nucleocytoplasmic transport	116699	Inpp4b	down	04070	Phosphatidylinositol signaling system
GO:0046822	regulation of nucleocytoplasmic transport	116699	Inpp4b	down	00562	Inositol phosphate metabolism
GO:0060394	negative regulation of pathway-restricted SMAD protein phosphorylation	367100	Smad6	down	04144	Endocytosis
GO:2000727	positive regulation of cardiac muscle cell differentiation	499497	Mef2c	down	05202	Transcriptional misregulation in cancer
GO:2000727	positive regulation of cardiac muscle cell differentiation	499497	Mef2c	down	04010	MAPK signaling pathway
GO:0007186	G-protein coupled receptor signaling pathway	81638	Agtr1b	down	04614	Renin-angiotensin system
GO:0006919	activation of cysteine-type endopeptidase activity involved in apoptotic process	29219	Snca	down	05010	Alzheimer's disease
GO:0006919	activation of cysteine-type endopeptidase activity involved in apoptotic process	29702	Eif2ak3	down	05160	Hepatitis C
GO:0006919	activation of cysteine-type endopeptidase activity involved in apoptotic process	29702	Eif2ak3	down	05164	Influenza A
GO:0006919	activation of cysteine-type endopeptidase activity involved in apoptotic process	29702	Eif2ak3	down	05010	Alzheimer's disease
GO:0006919	activation of cysteine-type endopeptidase activity involved in apoptotic process	29702	Eif2ak3	down	05168	Herpes simplex infection
GO:0006919	activation of cysteine-type endopeptidase activity involved in apoptotic process	29702	Eif2ak3	down	05162	Measles
GO:0006919	activation of cysteine-type endopeptidase activity involved in apoptotic process	25124	Stat1	down	05160	Hepatitis C
GO:0006919	activation of cysteine-type endopeptidase activity involved in apoptotic process	25124	Stat1	down	05164	Influenza A
GO:0006919	activation of cysteine-type endopeptidase activity involved in apoptotic process	25124	Stat1	down	05161	Hepatitis B
GO:0006919	activation of cysteine-type endopeptidase activity involved in apoptotic process	25124	Stat1	down	05168	Herpes simplex infection
GO:0006919	activation of cysteine-type endopeptidase activity involved in apoptotic process	25124	Stat1	down	05162	Measles
GO:0006919	activation of cysteine-type endopeptidase activity involved in apoptotic process	83571	Cdkn1b	down	05202	Transcriptional misregulation in cancer
GO:0006919	activation of cysteine-type endopeptidase activity involved in apoptotic process	83571	Cdkn1b	down	04110	Cell cycle
GO:0006919	activation of cysteine-type endopeptidase activity involved in apoptotic process	83571	Cdkn1b	down	05161	Hepatitis B
GO:0006919	activation of cysteine-type endopeptidase activity involved in apoptotic process	83571	Cdkn1b	down	05203	Viral carcinogenesis
GO:0006919	activation of cysteine-type endopeptidase activity involved in apoptotic process	83571	Cdkn1b	down	05162	Measles
GO:0007173	epidermal growth factor receptor signaling pathway	25313	Egf	down	05160	Hepatitis C
GO:0007173	epidermal growth factor receptor signaling pathway	25313	Egf	down	04144	Endocytosis
GO:0007173	epidermal growth factor receptor signaling pathway	25313	Egf	down	04010	MAPK signaling pathway
GO:0051726	regulation of cell cycle	300711	Atm	down	05202	Transcriptional misregulation in cancer
GO:0051726	regulation of cell cycle	300711	Atm	down	04110	Cell cycle
GO:0051726	regulation of cell cycle	81758	Rbl2	down	04110	Cell cycle
GO:0051726	regulation of cell cycle	81758	Rbl2	down	05203	Viral carcinogenesis
GO:0051726	regulation of cell cycle	680111	Rbl1	down	04110	Cell cycle
GO:0051726	regulation of cell cycle	680111	Rbl1	down	05203	Viral carcinogenesis
GO:0051726	regulation of cell cycle	294924	Mecom	down	04010	MAPK signaling pathway
GO:0008654	phospholipid biosynthetic process	313997	Mboat2	down	01100	Metabolic pathways
GO:0008654	phospholipid biosynthetic process	25096	Pld1	down	01100	Metabolic pathways
GO:0008654	phospholipid biosynthetic process	25096	Pld1	down	04144	Endocytosis
GO:0008654	phospholipid biosynthetic process	361467	Lpcat1	down	01100	Metabolic pathways
GO:0001934	positive regulation of protein phosphorylation	364594	Tlr3	down	05160	Hepatitis C
GO:0001934	positive regulation of protein phosphorylation	364594	Tlr3	down	05164	Influenza A
GO:0001934	positive regulation of protein phosphorylation	364594	Tlr3	down	05161	Hepatitis B
GO:0001934	positive regulation of protein phosphorylation	364594	Tlr3	down	05168	Herpes simplex infection
GO:0001934	positive regulation of protein phosphorylation	25372	Adrbk2	down	04740	Olfactory transduction
GO:0001934	positive regulation of protein phosphorylation	25372	Adrbk2	down	04144	Endocytosis
GO:0001934	positive regulation of protein phosphorylation	60460	Hspa2	down	04144	Endocytosis
GO:0001934	positive regulation of protein phosphorylation	60460	Hspa2	down	05164	Influenza A
GO:0001934	positive regulation of protein phosphorylation	60460	Hspa2	down	04010	MAPK signaling pathway
GO:0001934	positive regulation of protein phosphorylation	60460	Hspa2	down	05162	Measles
GO:0001934	positive regulation of protein phosphorylation	60460	Hspa2	down	03040	Spliceosome
GO:0001934	positive regulation of protein phosphorylation	311430	Mavs	down	05160	Hepatitis C
GO:0001934	positive regulation of protein phosphorylation	311430	Mavs	down	05164	Influenza A
GO:0001934	positive regulation of protein phosphorylation	311430	Mavs	down	05161	Hepatitis B
GO:0001934	positive regulation of protein phosphorylation	311430	Mavs	down	05168	Herpes simplex infection
GO:0001934	positive regulation of protein phosphorylation	311430	Mavs	down	05162	Measles
GO:0007243	intracellular protein kinase cascade	25313	Egf	down	05160	Hepatitis C
GO:0007243	intracellular protein kinase cascade	25313	Egf	down	04144	Endocytosis
GO:0007243	intracellular protein kinase cascade	25313	Egf	down	04010	MAPK signaling pathway
GO:0007243	intracellular protein kinase cascade	314384	Rps6ka5	down	04010	MAPK signaling pathway
GO:0006508	proteolysis	64678	Tfrc	down	04144	Endocytosis
GO:0006508	proteolysis	29153	Capn1	down	05010	Alzheimer's disease
GO:0006508	proteolysis	81641	Anpep	down	01100	Metabolic pathways
GO:0006508	proteolysis	81641	Anpep	down	04614	Renin-angiotensin system
GO:0006508	proteolysis	25619	Plau	down	05202	Transcriptional misregulation in cancer
GO:0006508	proteolysis	24310	Ace	down	04614	Renin-angiotensin system
GO:0002467	germinal center formation	499497	Mef2c	down	05202	Transcriptional misregulation in cancer
GO:0002467	germinal center formation	499497	Mef2c	down	04010	MAPK signaling pathway
GO:0090263	positive regulation of canonical Wnt receptor signaling pathway	25444	Fgf9	down	04010	MAPK signaling pathway
GO:0046777	protein autophosphorylation	300711	Atm	down	05202	Transcriptional misregulation in cancer
GO:0046777	protein autophosphorylation	300711	Atm	down	04110	Cell cycle
GO:0046777	protein autophosphorylation	29702	Eif2ak3	down	05160	Hepatitis C
GO:0046777	protein autophosphorylation	29702	Eif2ak3	down	05164	Influenza A
GO:0046777	protein autophosphorylation	29702	Eif2ak3	down	05010	Alzheimer's disease
GO:0046777	protein autophosphorylation	29702	Eif2ak3	down	05168	Herpes simplex infection
GO:0046777	protein autophosphorylation	29702	Eif2ak3	down	05162	Measles
GO:0046777	protein autophosphorylation	25579	Map3k12	down	04010	MAPK signaling pathway
GO:0050853	B cell receptor signaling pathway	499497	Mef2c	down	05202	Transcriptional misregulation in cancer
GO:0050853	B cell receptor signaling pathway	499497	Mef2c	down	04010	MAPK signaling pathway
GO:0003084	positive regulation of systemic arterial blood pressure	24310	Ace	down	04614	Renin-angiotensin system
GO:0019217	regulation of fatty acid metabolic process	29702	Eif2ak3	down	05160	Hepatitis C
GO:0019217	regulation of fatty acid metabolic process	29702	Eif2ak3	down	05164	Influenza A
GO:0019217	regulation of fatty acid metabolic process	29702	Eif2ak3	down	05010	Alzheimer's disease
GO:0019217	regulation of fatty acid metabolic process	29702	Eif2ak3	down	05168	Herpes simplex infection
GO:0019217	regulation of fatty acid metabolic process	29702	Eif2ak3	down	05162	Measles
GO:0035729	cellular response to hepatocyte growth factor stimulus	25619	Plau	down	05202	Transcriptional misregulation in cancer
GO:0071360	cellular response to exogenous dsRNA	364594	Tlr3	down	05160	Hepatitis C
GO:0071360	cellular response to exogenous dsRNA	364594	Tlr3	down	05164	Influenza A
GO:0071360	cellular response to exogenous dsRNA	364594	Tlr3	down	05161	Hepatitis B
GO:0071360	cellular response to exogenous dsRNA	364594	Tlr3	down	05168	Herpes simplex infection
GO:0071360	cellular response to exogenous dsRNA	311430	Mavs	down	05160	Hepatitis C
GO:0071360	cellular response to exogenous dsRNA	311430	Mavs	down	05164	Influenza A
GO:0071360	cellular response to exogenous dsRNA	311430	Mavs	down	05161	Hepatitis B
GO:0071360	cellular response to exogenous dsRNA	311430	Mavs	down	05168	Herpes simplex infection
GO:0071360	cellular response to exogenous dsRNA	311430	Mavs	down	05162	Measles
GO:0010468	regulation of gene expression	84350	Dnmt1	down	01100	Metabolic pathways
GO:0032088	negative regulation of NF-kappaB transcription factor activity	360592	Trim37	down	04120	Ubiquitin mediated proteolysis
GO:0032088	negative regulation of NF-kappaB transcription factor activity	362788	Traf3	down	05160	Hepatitis C
GO:0032088	negative regulation of NF-kappaB transcription factor activity	362788	Traf3	down	05203	Viral carcinogenesis
GO:0032088	negative regulation of NF-kappaB transcription factor activity	362788	Traf3	down	05168	Herpes simplex infection
GO:0048704	embryonic skeletal system morphogenesis	499497	Mef2c	down	05202	Transcriptional misregulation in cancer
GO:0048704	embryonic skeletal system morphogenesis	499497	Mef2c	down	04010	MAPK signaling pathway
GO:0048704	embryonic skeletal system morphogenesis	303991	Hoxd10	down	05202	Transcriptional misregulation in cancer
GO:0043123	positive regulation of I-kappaB kinase/NF-kappaB cascade	311430	Mavs	down	05160	Hepatitis C
GO:0043123	positive regulation of I-kappaB kinase/NF-kappaB cascade	311430	Mavs	down	05164	Influenza A
GO:0043123	positive regulation of I-kappaB kinase/NF-kappaB cascade	311430	Mavs	down	05161	Hepatitis B
GO:0043123	positive regulation of I-kappaB kinase/NF-kappaB cascade	311430	Mavs	down	05168	Herpes simplex infection
GO:0043123	positive regulation of I-kappaB kinase/NF-kappaB cascade	311430	Mavs	down	05162	Measles
GO:0043123	positive regulation of I-kappaB kinase/NF-kappaB cascade	364594	Tlr3	down	05160	Hepatitis C
GO:0043123	positive regulation of I-kappaB kinase/NF-kappaB cascade	364594	Tlr3	down	05164	Influenza A
GO:0043123	positive regulation of I-kappaB kinase/NF-kappaB cascade	364594	Tlr3	down	05161	Hepatitis B
GO:0043123	positive regulation of I-kappaB kinase/NF-kappaB cascade	364594	Tlr3	down	05168	Herpes simplex infection
GO:0043123	positive regulation of I-kappaB kinase/NF-kappaB cascade	116725	Ube2n	down	04120	Ubiquitin mediated proteolysis
GO:0007267	cell-cell signaling	25444	Fgf9	down	04010	MAPK signaling pathway
GO:0042981	regulation of apoptotic process	362788	Traf3	down	05160	Hepatitis C
GO:0042981	regulation of apoptotic process	362788	Traf3	down	05203	Viral carcinogenesis
GO:0042981	regulation of apoptotic process	362788	Traf3	down	05168	Herpes simplex infection
GO:0000723	telomere maintenance	310363	Fbxo4	down	04120	Ubiquitin mediated proteolysis
GO:0000723	telomere maintenance	300711	Atm	down	05202	Transcriptional misregulation in cancer
GO:0000723	telomere maintenance	300711	Atm	down	04110	Cell cycle
GO:0006297	nucleotide-excision repair, DNA gap filling	29240	Polb	down	05203	Viral carcinogenesis
GO:0006983	ER overload response	29702	Eif2ak3	down	05160	Hepatitis C
GO:0006983	ER overload response	29702	Eif2ak3	down	05164	Influenza A
GO:0006983	ER overload response	29702	Eif2ak3	down	05010	Alzheimer's disease
GO:0006983	ER overload response	29702	Eif2ak3	down	05168	Herpes simplex infection
GO:0006983	ER overload response	29702	Eif2ak3	down	05162	Measles
GO:0033673	negative regulation of kinase activity	83571	Cdkn1b	down	05202	Transcriptional misregulation in cancer
GO:0033673	negative regulation of kinase activity	83571	Cdkn1b	down	04110	Cell cycle
GO:0033673	negative regulation of kinase activity	83571	Cdkn1b	down	05161	Hepatitis B
GO:0033673	negative regulation of kinase activity	83571	Cdkn1b	down	05203	Viral carcinogenesis
GO:0033673	negative regulation of kinase activity	83571	Cdkn1b	down	05162	Measles
GO:0051571	positive regulation of histone H3-K4 methylation	84350	Dnmt1	down	01100	Metabolic pathways
GO:0071498	cellular response to fluid shear stress	499497	Mef2c	down	05202	Transcriptional misregulation in cancer
GO:0071498	cellular response to fluid shear stress	499497	Mef2c	down	04010	MAPK signaling pathway
GO:0071498	cellular response to fluid shear stress	25619	Plau	down	05202	Transcriptional misregulation in cancer
GO:0031623	receptor internalization	29219	Snca	down	05010	Alzheimer's disease
GO:0031623	receptor internalization	25372	Adrbk2	down	04740	Olfactory transduction
GO:0031623	receptor internalization	25372	Adrbk2	down	04144	Endocytosis
GO:0031623	receptor internalization	140694	Dnm1	down	04144	Endocytosis
GO:0034976	response to endoplasmic reticulum stress	29702	Eif2ak3	down	05160	Hepatitis C
GO:0034976	response to endoplasmic reticulum stress	29702	Eif2ak3	down	05164	Influenza A
GO:0034976	response to endoplasmic reticulum stress	29702	Eif2ak3	down	05010	Alzheimer's disease
GO:0034976	response to endoplasmic reticulum stress	29702	Eif2ak3	down	05168	Herpes simplex infection
GO:0034976	response to endoplasmic reticulum stress	29702	Eif2ak3	down	05162	Measles
GO:0034976	response to endoplasmic reticulum stress	362339	Creb3l2	down	05161	Hepatitis B
GO:0034976	response to endoplasmic reticulum stress	362339	Creb3l2	down	05203	Viral carcinogenesis
GO:0045787	positive regulation of cell cycle	313264	Trim32	down	04120	Ubiquitin mediated proteolysis
GO:0018022	peptidyl-lysine methylation	680537	Whsc1	down	05202	Transcriptional misregulation in cancer
GO:0031115	negative regulation of microtubule polymerization	171088	Inpp5j	down	01100	Metabolic pathways
GO:0031115	negative regulation of microtubule polymerization	171088	Inpp5j	down	04070	Phosphatidylinositol signaling system
GO:0031115	negative regulation of microtubule polymerization	171088	Inpp5j	down	00562	Inositol phosphate metabolism
GO:0031115	negative regulation of microtubule polymerization	29219	Snca	down	05010	Alzheimer's disease
GO:0046500	S-adenosylmethionine metabolic process	84350	Dnmt1	down	01100	Metabolic pathways
GO:0046500	S-adenosylmethionine metabolic process	83497	Ocln	down	05160	Hepatitis C
GO:2000678	negative regulation of transcription regulatory region DNA binding	363067	Sin3a	down	05202	Transcriptional misregulation in cancer
GO:0031016	pancreas development	29702	Eif2ak3	down	05160	Hepatitis C
GO:0031016	pancreas development	29702	Eif2ak3	down	05164	Influenza A
GO:0031016	pancreas development	29702	Eif2ak3	down	05010	Alzheimer's disease
GO:0031016	pancreas development	29702	Eif2ak3	down	05168	Herpes simplex infection
GO:0031016	pancreas development	29702	Eif2ak3	down	05162	Measles
GO:0035115	embryonic forelimb morphogenesis	294924	Mecom	down	04010	MAPK signaling pathway
GO:0051865	protein autoubiquitination	360592	Trim37	down	04120	Ubiquitin mediated proteolysis
GO:0035116	embryonic hindlimb morphogenesis	294924	Mecom	down	04010	MAPK signaling pathway
GO:0060021	palate development	499497	Mef2c	down	05202	Transcriptional misregulation in cancer
GO:0060021	palate development	499497	Mef2c	down	04010	MAPK signaling pathway
GO:0008584	male gonad development	364594	Tlr3	down	05160	Hepatitis C
GO:0008584	male gonad development	364594	Tlr3	down	05164	Influenza A
GO:0008584	male gonad development	364594	Tlr3	down	05161	Hepatitis B
GO:0008584	male gonad development	364594	Tlr3	down	05168	Herpes simplex infection
GO:0008584	male gonad development	25444	Fgf9	down	04010	MAPK signaling pathway
GO:0000245	spliceosomal complex assembly	100910202	Crnkl1	down	03040	Spliceosome
GO:0002230	positive regulation of defense response to virus by host	363067	Sin3a	down	05202	Transcriptional misregulation in cancer
GO:0002230	positive regulation of defense response to virus by host	311430	Mavs	down	05160	Hepatitis C
GO:0002230	positive regulation of defense response to virus by host	311430	Mavs	down	05164	Influenza A
GO:0002230	positive regulation of defense response to virus by host	311430	Mavs	down	05161	Hepatitis B
GO:0002230	positive regulation of defense response to virus by host	311430	Mavs	down	05168	Herpes simplex infection
GO:0002230	positive regulation of defense response to virus by host	311430	Mavs	down	05162	Measles
GO:0006183	GTP biosynthetic process	58964	Nme6	down	01100	Metabolic pathways
GO:0006183	GTP biosynthetic process	171566	Nme7	down	01100	Metabolic pathways
GO:0006228	UTP biosynthetic process	58964	Nme6	down	01100	Metabolic pathways
GO:0006228	UTP biosynthetic process	171566	Nme7	down	01100	Metabolic pathways
GO:0006241	CTP biosynthetic process	171566	Nme7	down	01100	Metabolic pathways
GO:0006241	CTP biosynthetic process	58964	Nme6	down	01100	Metabolic pathways
GO:0030220	platelet formation	499497	Mef2c	down	05202	Transcriptional misregulation in cancer
GO:0030220	platelet formation	499497	Mef2c	down	04010	MAPK signaling pathway
GO:0043069	negative regulation of programmed cell death	294924	Mecom	down	04010	MAPK signaling pathway
GO:0043517	positive regulation of DNA damage response, signal transduction by p53 class mediator	300711	Atm	down	05202	Transcriptional misregulation in cancer
GO:0043517	positive regulation of DNA damage response, signal transduction by p53 class mediator	300711	Atm	down	04110	Cell cycle
GO:0046498	S-adenosylhomocysteine metabolic process	83497	Ocln	down	05160	Hepatitis C
GO:0046498	S-adenosylhomocysteine metabolic process	84350	Dnmt1	down	01100	Metabolic pathways
GO:0060042	retina morphogenesis in camera-type eye	60357	Prom1	down	05202	Transcriptional misregulation in cancer
GO:0060993	kidney morphogenesis	64043	Gcnt1	down	01100	Metabolic pathways
GO:0002053	positive regulation of mesenchymal cell proliferation	25444	Fgf9	down	04010	MAPK signaling pathway
GO:0030514	negative regulation of BMP signaling pathway	367100	Smad6	down	04144	Endocytosis
GO:0036092	phosphatidylinositol-3-phosphate biosynthetic process	300711	Atm	down	05202	Transcriptional misregulation in cancer
GO:0036092	phosphatidylinositol-3-phosphate biosynthetic process	300711	Atm	down	04110	Cell cycle
GO:0036092	phosphatidylinositol-3-phosphate biosynthetic process	116699	Inpp4b	down	01100	Metabolic pathways
GO:0036092	phosphatidylinositol-3-phosphate biosynthetic process	116699	Inpp4b	down	04070	Phosphatidylinositol signaling system
GO:0036092	phosphatidylinositol-3-phosphate biosynthetic process	116699	Inpp4b	down	00562	Inositol phosphate metabolism
GO:0045670	regulation of osteoclast differentiation	29650	Adam10	down	05010	Alzheimer's disease
GO:0030307	positive regulation of cell growth	29650	Adam10	down	05010	Alzheimer's disease
GO:0030307	positive regulation of cell growth	313264	Trim32	down	04120	Ubiquitin mediated proteolysis
GO:0007507	heart development	499497	Mef2c	down	05202	Transcriptional misregulation in cancer
GO:0007507	heart development	499497	Mef2c	down	04010	MAPK signaling pathway
GO:0007507	heart development	300711	Atm	down	05202	Transcriptional misregulation in cancer
GO:0007507	heart development	300711	Atm	down	04110	Cell cycle
GO:0007507	heart development	300947	Tfdp2	down	04110	Cell cycle
GO:0005975	carbohydrate metabolic process	25739	Pygb	down	01100	Metabolic pathways
GO:0005975	carbohydrate metabolic process	24382	Ganc	down	01100	Metabolic pathways
GO:0032526	response to retinoic acid	64678	Tfrc	down	04144	Endocytosis
GO:0032092	positive regulation of protein binding	29702	Eif2ak3	down	05160	Hepatitis C
GO:0032092	positive regulation of protein binding	29702	Eif2ak3	down	05164	Influenza A
GO:0032092	positive regulation of protein binding	29702	Eif2ak3	down	05010	Alzheimer's disease
GO:0032092	positive regulation of protein binding	29702	Eif2ak3	down	05168	Herpes simplex infection
GO:0032092	positive regulation of protein binding	29702	Eif2ak3	down	05162	Measles
GO:0060348	bone development	680537	Whsc1	down	05202	Transcriptional misregulation in cancer
GO:0006306	DNA methylation	84350	Dnmt1	down	01100	Metabolic pathways
GO:0009411	response to UV	313264	Trim32	down	04120	Ubiquitin mediated proteolysis
GO:0048706	embryonic skeletal system development	25444	Fgf9	down	04010	MAPK signaling pathway
GO:0017148	negative regulation of translation	29702	Eif2ak3	down	05160	Hepatitis C
GO:0017148	negative regulation of translation	29702	Eif2ak3	down	05164	Influenza A
GO:0017148	negative regulation of translation	29702	Eif2ak3	down	05010	Alzheimer's disease
GO:0017148	negative regulation of translation	29702	Eif2ak3	down	05168	Herpes simplex infection
GO:0017148	negative regulation of translation	29702	Eif2ak3	down	05162	Measles
GO:0035335	peptidyl-tyrosine dephosphorylation	361195	Cdc14b	down	04110	Cell cycle
GO:0000271	polysaccharide biosynthetic process	29633	Ndst1	down	01100	Metabolic pathways
GO:0003138	primary heart field specification	499497	Mef2c	down	05202	Transcriptional misregulation in cancer
GO:0003138	primary heart field specification	499497	Mef2c	down	04010	MAPK signaling pathway
GO:0003185	sinoatrial valve morphogenesis	499497	Mef2c	down	05202	Transcriptional misregulation in cancer
GO:0003185	sinoatrial valve morphogenesis	499497	Mef2c	down	04010	MAPK signaling pathway
GO:0006226	dUMP biosynthetic process	497778	Dut	down	01100	Metabolic pathways
GO:0010517	regulation of phospholipase activity	29219	Snca	down	05010	Alzheimer's disease
GO:0015876	acetyl-CoA transport	64018	Slc33a1	down	01100	Metabolic pathways
GO:0031058	positive regulation of histone modification	116725	Ube2n	down	04120	Ubiquitin mediated proteolysis
GO:0031662	positive regulation of cyclin-dependent protein serine/threonine kinase activity involved in G2/M transition of mitotic cell cycle	60460	Hspa2	down	04144	Endocytosis
GO:0031662	positive regulation of cyclin-dependent protein serine/threonine kinase activity involved in G2/M transition of mitotic cell cycle	60460	Hspa2	down	05164	Influenza A
GO:0031662	positive regulation of cyclin-dependent protein serine/threonine kinase activity involved in G2/M transition of mitotic cell cycle	60460	Hspa2	down	04010	MAPK signaling pathway
GO:0031662	positive regulation of cyclin-dependent protein serine/threonine kinase activity involved in G2/M transition of mitotic cell cycle	60460	Hspa2	down	05162	Measles
GO:0031662	positive regulation of cyclin-dependent protein serine/threonine kinase activity involved in G2/M transition of mitotic cell cycle	60460	Hspa2	down	03040	Spliceosome
GO:0032385	positive regulation of intracellular cholesterol transport	25541	Scp2	down	01100	Metabolic pathways
GO:0032769	negative regulation of monooxygenase activity	29219	Snca	down	05010	Alzheimer's disease
GO:0033182	regulation of histone ubiquitination	116725	Ube2n	down	04120	Ubiquitin mediated proteolysis
GO:0033386	geranylgeranyl diphosphate biosynthetic process	291211	Ggps1	down	01100	Metabolic pathways
GO:0033577	protein glycosylation in endoplasmic reticulum	313231	Alg2	down	01100	Metabolic pathways
GO:0034346	positive regulation of type III interferon production	364594	Tlr3	down	05160	Hepatitis C
GO:0034346	positive regulation of type III interferon production	364594	Tlr3	down	05164	Influenza A
GO:0034346	positive regulation of type III interferon production	364594	Tlr3	down	05161	Hepatitis B
GO:0034346	positive regulation of type III interferon production	364594	Tlr3	down	05168	Herpes simplex infection
GO:0035728	response to hepatocyte growth factor stimulus	25619	Plau	down	05202	Transcriptional misregulation in cancer
GO:0035984	cellular response to trichostatin A	499497	Mef2c	down	05202	Transcriptional misregulation in cancer
GO:0035984	cellular response to trichostatin A	499497	Mef2c	down	04010	MAPK signaling pathway
GO:0043990	histone H2A-S1 phosphorylation	314384	Rps6ka5	down	04010	MAPK signaling pathway
GO:0045940	positive regulation of steroid metabolic process	25541	Scp2	down	01100	Metabolic pathways
GO:0046081	dUTP catabolic process	497778	Dut	down	01100	Metabolic pathways
GO:0046154	rhodopsin metabolic process	25372	Adrbk2	down	04740	Olfactory transduction
GO:0046154	rhodopsin metabolic process	25372	Adrbk2	down	04144	Endocytosis
GO:0050812	regulation of acyl-CoA biosynthetic process	29219	Snca	down	05010	Alzheimer's disease
GO:0051089	constitutive protein ectodomain proteolysis	29650	Adam10	down	05010	Alzheimer's disease
GO:0051585	negative regulation of dopamine uptake involved in synaptic transmission	29219	Snca	down	05010	Alzheimer's disease
GO:0051595	response to methylglyoxal	363067	Sin3a	down	05202	Transcriptional misregulation in cancer
GO:0051622	negative regulation of norepinephrine uptake	29219	Snca	down	05010	Alzheimer's disease
GO:0060025	regulation of synaptic activity	499497	Mef2c	down	05202	Transcriptional misregulation in cancer
GO:0060025	regulation of synaptic activity	499497	Mef2c	down	04010	MAPK signaling pathway
GO:0060978	angiogenesis involved in coronary vascular morphogenesis	24310	Ace	down	04614	Renin-angiotensin system
GO:0070194	synaptonemal complex disassembly	60460	Hspa2	down	04144	Endocytosis
GO:0070194	synaptonemal complex disassembly	60460	Hspa2	down	05164	Influenza A
GO:0070194	synaptonemal complex disassembly	60460	Hspa2	down	04010	MAPK signaling pathway
GO:0070194	synaptonemal complex disassembly	60460	Hspa2	down	05162	Measles
GO:0070194	synaptonemal complex disassembly	60460	Hspa2	down	03040	Spliceosome
GO:0070495	negative regulation of thrombin receptor signaling pathway	29219	Snca	down	05010	Alzheimer's disease
GO:0071651	positive regulation of chemokine (C-C motif) ligand 5 production	311430	Mavs	down	05160	Hepatitis C
GO:0071651	positive regulation of chemokine (C-C motif) ligand 5 production	311430	Mavs	down	05164	Influenza A
GO:0071651	positive regulation of chemokine (C-C motif) ligand 5 production	311430	Mavs	down	05161	Hepatitis B
GO:0071651	positive regulation of chemokine (C-C motif) ligand 5 production	311430	Mavs	down	05168	Herpes simplex infection
GO:0071651	positive regulation of chemokine (C-C motif) ligand 5 production	311430	Mavs	down	05162	Measles
GO:0071660	positive regulation of IP-10 production	311430	Mavs	down	05160	Hepatitis C
GO:0071660	positive regulation of IP-10 production	311430	Mavs	down	05164	Influenza A
GO:0071660	positive regulation of IP-10 production	311430	Mavs	down	05161	Hepatitis B
GO:0071660	positive regulation of IP-10 production	311430	Mavs	down	05168	Herpes simplex infection
GO:0071660	positive regulation of IP-10 production	311430	Mavs	down	05162	Measles
GO:1901373	lipid hydroperoxide transport	25541	Scp2	down	01100	Metabolic pathways
GO:1901675	negative regulation of histone H3-K27 acetylation	363067	Sin3a	down	05202	Transcriptional misregulation in cancer
GO:2000097	regulation of smooth muscle cell-matrix adhesion	25619	Plau	down	05202	Transcriptional misregulation in cancer
GO:2000345	regulation of hepatocyte proliferation	25619	Plau	down	05202	Transcriptional misregulation in cancer
GO:2001246	negative regulation of phosphatidylcholine biosynthetic process	361467	Lpcat1	down	01100	Metabolic pathways
GO:0002063	chondrocyte development	29702	Eif2ak3	down	05160	Hepatitis C
GO:0002063	chondrocyte development	29702	Eif2ak3	down	05164	Influenza A
GO:0002063	chondrocyte development	29702	Eif2ak3	down	05010	Alzheimer's disease
GO:0002063	chondrocyte development	29702	Eif2ak3	down	05168	Herpes simplex infection
GO:0002063	chondrocyte development	29702	Eif2ak3	down	05162	Measles
GO:0002089	lens morphogenesis in camera-type eye	686117	Meis1	down	05202	Transcriptional misregulation in cancer
GO:0002224	toll-like receptor signaling pathway	364594	Tlr3	down	05160	Hepatitis C
GO:0002224	toll-like receptor signaling pathway	364594	Tlr3	down	05164	Influenza A
GO:0002224	toll-like receptor signaling pathway	364594	Tlr3	down	05161	Hepatitis B
GO:0002224	toll-like receptor signaling pathway	364594	Tlr3	down	05168	Herpes simplex infection
GO:0002224	toll-like receptor signaling pathway	362788	Traf3	down	05160	Hepatitis C
GO:0002224	toll-like receptor signaling pathway	362788	Traf3	down	05203	Viral carcinogenesis
GO:0002224	toll-like receptor signaling pathway	362788	Traf3	down	05168	Herpes simplex infection
GO:0021542	dentate gyrus development	499497	Mef2c	down	05202	Transcriptional misregulation in cancer
GO:0021542	dentate gyrus development	499497	Mef2c	down	04010	MAPK signaling pathway
GO:0071044	histone mRNA catabolic process	300711	Atm	down	05202	Transcriptional misregulation in cancer
GO:0071044	histone mRNA catabolic process	300711	Atm	down	04110	Cell cycle
GO:0043066	negative regulation of apoptotic process	24617	Serpine1	up	05142	Chagas disease (American trypanosomiasis)
GO:0043066	negative regulation of apoptotic process	24617	Serpine1	up	04066	HIF-1 signaling pathway
GO:0043066	negative regulation of apoptotic process	24617	Serpine1	up	04610	Complement and coagulation cascades
GO:0043066	negative regulation of apoptotic process	24617	Serpine1	up	04115	p53 signaling pathway
GO:0043066	negative regulation of apoptotic process	114851	Cdkn1a	up	05160	Hepatitis C
GO:0043066	negative regulation of apoptotic process	114851	Cdkn1a	up	05200	Pathways in cancer
GO:0043066	negative regulation of apoptotic process	114851	Cdkn1a	up	05202	Transcriptional misregulation in cancer
GO:0043066	negative regulation of apoptotic process	114851	Cdkn1a	up	05166	HTLV-I infection
GO:0043066	negative regulation of apoptotic process	114851	Cdkn1a	up	05220	Chronic myeloid leukemia
GO:0043066	negative regulation of apoptotic process	114851	Cdkn1a	up	04066	HIF-1 signaling pathway
GO:0043066	negative regulation of apoptotic process	114851	Cdkn1a	up	04151	PI3K-Akt signaling pathway
GO:0043066	negative regulation of apoptotic process	114851	Cdkn1a	up	05161	Hepatitis B
GO:0043066	negative regulation of apoptotic process	114851	Cdkn1a	up	05169	Epstein-Barr virus infection
GO:0043066	negative regulation of apoptotic process	114851	Cdkn1a	up	05215	Prostate cancer
GO:0043066	negative regulation of apoptotic process	114851	Cdkn1a	up	04012	ErbB signaling pathway
GO:0043066	negative regulation of apoptotic process	114851	Cdkn1a	up	05219	Bladder cancer
GO:0043066	negative regulation of apoptotic process	114851	Cdkn1a	up	04115	p53 signaling pathway
GO:0043066	negative regulation of apoptotic process	58853	Nr4a3	up	05202	Transcriptional misregulation in cancer
GO:0043066	negative regulation of apoptotic process	362850	Angptl4	up	03320	PPAR signaling pathway
GO:0043066	negative regulation of apoptotic process	24649	Pim1	up	04630	Jak-STAT signaling pathway
GO:0043066	negative regulation of apoptotic process	24649	Pim1	up	05221	Acute myeloid leukemia
GO:0043066	negative regulation of apoptotic process	29517	Sgk1	up	04151	PI3K-Akt signaling pathway
GO:0043066	negative regulation of apoptotic process	24498	Il6	up	04060	Cytokine-cytokine receptor interaction
GO:0043066	negative regulation of apoptotic process	24498	Il6	up	05134	Legionellosis
GO:0043066	negative regulation of apoptotic process	24498	Il6	up	05200	Pathways in cancer
GO:0043066	negative regulation of apoptotic process	24498	Il6	up	05202	Transcriptional misregulation in cancer
GO:0043066	negative regulation of apoptotic process	24498	Il6	up	05152	Tuberculosis
GO:0043066	negative regulation of apoptotic process	24498	Il6	up	05166	HTLV-I infection
GO:0043066	negative regulation of apoptotic process	24498	Il6	up	05142	Chagas disease (American trypanosomiasis)
GO:0043066	negative regulation of apoptotic process	24498	Il6	up	05132	Salmonella infection
GO:0043066	negative regulation of apoptotic process	24498	Il6	up	04621	NOD-like receptor signaling pathway
GO:0043066	negative regulation of apoptotic process	24498	Il6	up	04630	Jak-STAT signaling pathway
GO:0043066	negative regulation of apoptotic process	24498	Il6	up	05143	African trypanosomiasis
GO:0043066	negative regulation of apoptotic process	24498	Il6	up	04066	HIF-1 signaling pathway
GO:0043066	negative regulation of apoptotic process	24498	Il6	up	04620	Toll-like receptor signaling pathway
GO:0043066	negative regulation of apoptotic process	24498	Il6	up	04151	PI3K-Akt signaling pathway
GO:0043066	negative regulation of apoptotic process	24498	Il6	up	05162	Measles
GO:0043066	negative regulation of apoptotic process	24498	Il6	up	05161	Hepatitis B
GO:0043066	negative regulation of apoptotic process	24498	Il6	up	04623	Cytosolic DNA-sensing pathway
GO:0043066	negative regulation of apoptotic process	24498	Il6	up	05144	Malaria
GO:0043066	negative regulation of apoptotic process	24498	Il6	up	05164	Influenza A
GO:0043066	negative regulation of apoptotic process	24498	Il6	up	05323	Rheumatoid arthritis
GO:0043066	negative regulation of apoptotic process	24498	Il6	up	05133	Pertussis
GO:0043066	negative regulation of apoptotic process	50692	Plaur	up	04610	Complement and coagulation cascades
GO:0043066	negative regulation of apoptotic process	50646	Ptk2b	up	04062	Chemokine signaling pathway
GO:0043066	negative regulation of apoptotic process	50646	Ptk2b	up	05161	Hepatitis B
GO:0043066	negative regulation of apoptotic process	50646	Ptk2b	up	04670	Leukocyte transendothelial migration
GO:0043066	negative regulation of apoptotic process	81809	Tgfb2	up	04060	Cytokine-cytokine receptor interaction
GO:0043066	negative regulation of apoptotic process	81809	Tgfb2	up	05200	Pathways in cancer
GO:0043066	negative regulation of apoptotic process	81809	Tgfb2	up	05152	Tuberculosis
GO:0043066	negative regulation of apoptotic process	81809	Tgfb2	up	05166	HTLV-I infection
GO:0043066	negative regulation of apoptotic process	81809	Tgfb2	up	04380	Osteoclast differentiation
GO:0043066	negative regulation of apoptotic process	81809	Tgfb2	up	05220	Chronic myeloid leukemia
GO:0043066	negative regulation of apoptotic process	81809	Tgfb2	up	05142	Chagas disease (American trypanosomiasis)
GO:0043066	negative regulation of apoptotic process	81809	Tgfb2	up	04010	MAPK signaling pathway
GO:0043066	negative regulation of apoptotic process	81809	Tgfb2	up	05161	Hepatitis B
GO:0043066	negative regulation of apoptotic process	81809	Tgfb2	up	05144	Malaria
GO:0043066	negative regulation of apoptotic process	81809	Tgfb2	up	05140	Leishmaniasis
GO:0043066	negative regulation of apoptotic process	81809	Tgfb2	up	04350	TGF-beta signaling pathway
GO:0043066	negative regulation of apoptotic process	81809	Tgfb2	up	05145	Toxoplasmosis
GO:0043066	negative regulation of apoptotic process	81809	Tgfb2	up	05323	Rheumatoid arthritis
GO:0043066	negative regulation of apoptotic process	81809	Tgfb2	up	05212	Pancreatic cancer
GO:0043066	negative regulation of apoptotic process	24253	Cebpb	up	05202	Transcriptional misregulation in cancer
GO:0043066	negative regulation of apoptotic process	24253	Cebpb	up	05152	Tuberculosis
GO:0043066	negative regulation of apoptotic process	309165	Rela	up	05160	Hepatitis C
GO:0043066	negative regulation of apoptotic process	309165	Rela	up	04064	NF-kappa B signaling pathway
GO:0043066	negative regulation of apoptotic process	309165	Rela	up	05134	Legionellosis
GO:0043066	negative regulation of apoptotic process	309165	Rela	up	05200	Pathways in cancer
GO:0043066	negative regulation of apoptotic process	309165	Rela	up	05202	Transcriptional misregulation in cancer
GO:0043066	negative regulation of apoptotic process	309165	Rela	up	05152	Tuberculosis
GO:0043066	negative regulation of apoptotic process	309165	Rela	up	05166	HTLV-I infection
GO:0043066	negative regulation of apoptotic process	309165	Rela	up	04380	Osteoclast differentiation
GO:0043066	negative regulation of apoptotic process	309165	Rela	up	05220	Chronic myeloid leukemia
GO:0043066	negative regulation of apoptotic process	309165	Rela	up	05142	Chagas disease (American trypanosomiasis)
GO:0043066	negative regulation of apoptotic process	309165	Rela	up	05132	Salmonella infection
GO:0043066	negative regulation of apoptotic process	309165	Rela	up	04621	NOD-like receptor signaling pathway
GO:0043066	negative regulation of apoptotic process	309165	Rela	up	04062	Chemokine signaling pathway
GO:0043066	negative regulation of apoptotic process	309165	Rela	up	04010	MAPK signaling pathway
GO:0043066	negative regulation of apoptotic process	309165	Rela	up	04066	HIF-1 signaling pathway
GO:0043066	negative regulation of apoptotic process	309165	Rela	up	04620	Toll-like receptor signaling pathway
GO:0043066	negative regulation of apoptotic process	309165	Rela	up	04151	PI3K-Akt signaling pathway
GO:0043066	negative regulation of apoptotic process	309165	Rela	up	05162	Measles
GO:0043066	negative regulation of apoptotic process	309165	Rela	up	05161	Hepatitis B
GO:0043066	negative regulation of apoptotic process	309165	Rela	up	04660	T cell receptor signaling pathway
GO:0043066	negative regulation of apoptotic process	309165	Rela	up	04623	Cytosolic DNA-sensing pathway
GO:0043066	negative regulation of apoptotic process	309165	Rela	up	05221	Acute myeloid leukemia
GO:0043066	negative regulation of apoptotic process	309165	Rela	up	05164	Influenza A
GO:0043066	negative regulation of apoptotic process	309165	Rela	up	05169	Epstein-Barr virus infection
GO:0043066	negative regulation of apoptotic process	309165	Rela	up	04920	Adipocytokine signaling pathway
GO:0043066	negative regulation of apoptotic process	309165	Rela	up	05140	Leishmaniasis
GO:0043066	negative regulation of apoptotic process	309165	Rela	up	05145	Toxoplasmosis
GO:0043066	negative regulation of apoptotic process	309165	Rela	up	05215	Prostate cancer
GO:0043066	negative regulation of apoptotic process	309165	Rela	up	05212	Pancreatic cancer
GO:0043066	negative regulation of apoptotic process	309165	Rela	up	05133	Pertussis
GO:0043066	negative regulation of apoptotic process	309165	Rela	up	04662	B cell receptor signaling pathway
GO:0043066	negative regulation of apoptotic process	24404	Gpx1	up	00480	Glutathione metabolism
GO:0043066	negative regulation of apoptotic process	296269	Angpt4	up	04066	HIF-1 signaling pathway
GO:0043066	negative regulation of apoptotic process	296269	Angpt4	up	04151	PI3K-Akt signaling pathway
GO:0043066	negative regulation of apoptotic process	29142	Vnn1	up	00770	Pantothenate and CoA biosynthesis
GO:0043066	negative regulation of apoptotic process	24329	Egfr	up	05160	Hepatitis C
GO:0043066	negative regulation of apoptotic process	24329	Egfr	up	04060	Cytokine-cytokine receptor interaction
GO:0043066	negative regulation of apoptotic process	24329	Egfr	up	05200	Pathways in cancer
GO:0043066	negative regulation of apoptotic process	24329	Egfr	up	04010	MAPK signaling pathway
GO:0043066	negative regulation of apoptotic process	24329	Egfr	up	04066	HIF-1 signaling pathway
GO:0043066	negative regulation of apoptotic process	24329	Egfr	up	04151	PI3K-Akt signaling pathway
GO:0043066	negative regulation of apoptotic process	24329	Egfr	up	05215	Prostate cancer
GO:0043066	negative regulation of apoptotic process	24329	Egfr	up	04012	ErbB signaling pathway
GO:0043066	negative regulation of apoptotic process	24329	Egfr	up	05212	Pancreatic cancer
GO:0043066	negative regulation of apoptotic process	24329	Egfr	up	05219	Bladder cancer
GO:0043066	negative regulation of apoptotic process	24165	Ada	up	01100	Metabolic pathways
GO:0043066	negative regulation of apoptotic process	24165	Ada	up	00230	Purine metabolism
GO:0043066	negative regulation of apoptotic process	29539	Aldh2	up	01100	Metabolic pathways
GO:0043066	negative regulation of apoptotic process	29539	Aldh2	up	00280	Valine, leucine and isoleucine degradation
GO:0043066	negative regulation of apoptotic process	29539	Aldh2	up	00410	beta-Alanine metabolism
GO:0043066	negative regulation of apoptotic process	29539	Aldh2	up	00071	Fatty acid degradation
GO:0043066	negative regulation of apoptotic process	29539	Aldh2	up	00310	Lysine degradation
GO:0043066	negative regulation of apoptotic process	29539	Aldh2	up	00561	Glycerolipid metabolism
GO:0043066	negative regulation of apoptotic process	29539	Aldh2	up	00330	Arginine and proline metabolism
GO:0043066	negative regulation of apoptotic process	112400	Nrg1	up	04012	ErbB signaling pathway
GO:0043066	negative regulation of apoptotic process	81736	Nfkb1	up	05160	Hepatitis C
GO:0043066	negative regulation of apoptotic process	81736	Nfkb1	up	04064	NF-kappa B signaling pathway
GO:0043066	negative regulation of apoptotic process	81736	Nfkb1	up	05134	Legionellosis
GO:0043066	negative regulation of apoptotic process	81736	Nfkb1	up	05200	Pathways in cancer
GO:0043066	negative regulation of apoptotic process	81736	Nfkb1	up	05202	Transcriptional misregulation in cancer
GO:0043066	negative regulation of apoptotic process	81736	Nfkb1	up	05152	Tuberculosis
GO:0043066	negative regulation of apoptotic process	81736	Nfkb1	up	05166	HTLV-I infection
GO:0043066	negative regulation of apoptotic process	81736	Nfkb1	up	04380	Osteoclast differentiation
GO:0043066	negative regulation of apoptotic process	81736	Nfkb1	up	05220	Chronic myeloid leukemia
GO:0043066	negative regulation of apoptotic process	81736	Nfkb1	up	05142	Chagas disease (American trypanosomiasis)
GO:0043066	negative regulation of apoptotic process	81736	Nfkb1	up	05132	Salmonella infection
GO:0043066	negative regulation of apoptotic process	81736	Nfkb1	up	04621	NOD-like receptor signaling pathway
GO:0043066	negative regulation of apoptotic process	81736	Nfkb1	up	04062	Chemokine signaling pathway
GO:0043066	negative regulation of apoptotic process	81736	Nfkb1	up	04010	MAPK signaling pathway
GO:0043066	negative regulation of apoptotic process	81736	Nfkb1	up	04066	HIF-1 signaling pathway
GO:0043066	negative regulation of apoptotic process	81736	Nfkb1	up	04620	Toll-like receptor signaling pathway
GO:0043066	negative regulation of apoptotic process	81736	Nfkb1	up	04151	PI3K-Akt signaling pathway
GO:0043066	negative regulation of apoptotic process	81736	Nfkb1	up	05162	Measles
GO:0043066	negative regulation of apoptotic process	81736	Nfkb1	up	05161	Hepatitis B
GO:0043066	negative regulation of apoptotic process	81736	Nfkb1	up	04660	T cell receptor signaling pathway
GO:0043066	negative regulation of apoptotic process	81736	Nfkb1	up	04623	Cytosolic DNA-sensing pathway
GO:0043066	negative regulation of apoptotic process	81736	Nfkb1	up	05221	Acute myeloid leukemia
GO:0043066	negative regulation of apoptotic process	81736	Nfkb1	up	05164	Influenza A
GO:0043066	negative regulation of apoptotic process	81736	Nfkb1	up	05169	Epstein-Barr virus infection
GO:0043066	negative regulation of apoptotic process	81736	Nfkb1	up	04920	Adipocytokine signaling pathway
GO:0043066	negative regulation of apoptotic process	81736	Nfkb1	up	05140	Leishmaniasis
GO:0043066	negative regulation of apoptotic process	81736	Nfkb1	up	05145	Toxoplasmosis
GO:0043066	negative regulation of apoptotic process	81736	Nfkb1	up	05215	Prostate cancer
GO:0043066	negative regulation of apoptotic process	81736	Nfkb1	up	05212	Pancreatic cancer
GO:0043066	negative regulation of apoptotic process	81736	Nfkb1	up	05133	Pertussis
GO:0043066	negative regulation of apoptotic process	81736	Nfkb1	up	04662	B cell receptor signaling pathway
GO:0032496	response to lipopolysaccharide	309452	Nfkb2	up	04064	NF-kappa B signaling pathway
GO:0032496	response to lipopolysaccharide	309452	Nfkb2	up	05134	Legionellosis
GO:0032496	response to lipopolysaccharide	309452	Nfkb2	up	05200	Pathways in cancer
GO:0032496	response to lipopolysaccharide	309452	Nfkb2	up	05166	HTLV-I infection
GO:0032496	response to lipopolysaccharide	309452	Nfkb2	up	04380	Osteoclast differentiation
GO:0032496	response to lipopolysaccharide	309452	Nfkb2	up	04010	MAPK signaling pathway
GO:0032496	response to lipopolysaccharide	309452	Nfkb2	up	05169	Epstein-Barr virus infection
GO:0032496	response to lipopolysaccharide	25584	F3	up	04610	Complement and coagulation cascades
GO:0032496	response to lipopolysaccharide	24253	Cebpb	up	05202	Transcriptional misregulation in cancer
GO:0032496	response to lipopolysaccharide	24253	Cebpb	up	05152	Tuberculosis
GO:0032496	response to lipopolysaccharide	29539	Aldh2	up	01100	Metabolic pathways
GO:0032496	response to lipopolysaccharide	29539	Aldh2	up	00280	Valine, leucine and isoleucine degradation
GO:0032496	response to lipopolysaccharide	29539	Aldh2	up	00410	beta-Alanine metabolism
GO:0032496	response to lipopolysaccharide	29539	Aldh2	up	00071	Fatty acid degradation
GO:0032496	response to lipopolysaccharide	29539	Aldh2	up	00310	Lysine degradation
GO:0032496	response to lipopolysaccharide	29539	Aldh2	up	00561	Glycerolipid metabolism
GO:0032496	response to lipopolysaccharide	29539	Aldh2	up	00330	Arginine and proline metabolism
GO:0032496	response to lipopolysaccharide	24498	Il6	up	04060	Cytokine-cytokine receptor interaction
GO:0032496	response to lipopolysaccharide	24498	Il6	up	05134	Legionellosis
GO:0032496	response to lipopolysaccharide	24498	Il6	up	05200	Pathways in cancer
GO:0032496	response to lipopolysaccharide	24498	Il6	up	05202	Transcriptional misregulation in cancer
GO:0032496	response to lipopolysaccharide	24498	Il6	up	05152	Tuberculosis
GO:0032496	response to lipopolysaccharide	24498	Il6	up	05166	HTLV-I infection
GO:0032496	response to lipopolysaccharide	24498	Il6	up	05142	Chagas disease (American trypanosomiasis)
GO:0032496	response to lipopolysaccharide	24498	Il6	up	05132	Salmonella infection
GO:0032496	response to lipopolysaccharide	24498	Il6	up	04621	NOD-like receptor signaling pathway
GO:0032496	response to lipopolysaccharide	24498	Il6	up	04630	Jak-STAT signaling pathway
GO:0032496	response to lipopolysaccharide	24498	Il6	up	05143	African trypanosomiasis
GO:0032496	response to lipopolysaccharide	24498	Il6	up	04066	HIF-1 signaling pathway
GO:0032496	response to lipopolysaccharide	24498	Il6	up	04620	Toll-like receptor signaling pathway
GO:0032496	response to lipopolysaccharide	24498	Il6	up	04151	PI3K-Akt signaling pathway
GO:0032496	response to lipopolysaccharide	24498	Il6	up	05162	Measles
GO:0032496	response to lipopolysaccharide	24498	Il6	up	05161	Hepatitis B
GO:0032496	response to lipopolysaccharide	24498	Il6	up	04623	Cytosolic DNA-sensing pathway
GO:0032496	response to lipopolysaccharide	24498	Il6	up	05144	Malaria
GO:0032496	response to lipopolysaccharide	24498	Il6	up	05164	Influenza A
GO:0032496	response to lipopolysaccharide	24498	Il6	up	05323	Rheumatoid arthritis
GO:0032496	response to lipopolysaccharide	24498	Il6	up	05133	Pertussis
GO:0032496	response to lipopolysaccharide	63995	Dusp10	up	04010	MAPK signaling pathway
GO:0032496	response to lipopolysaccharide	81503	Cxcl1	up	05134	Legionellosis
GO:0032496	response to lipopolysaccharide	81503	Cxcl1	up	05132	Salmonella infection
GO:0032496	response to lipopolysaccharide	81503	Cxcl1	up	04621	NOD-like receptor signaling pathway
GO:0032496	response to lipopolysaccharide	81503	Cxcl1	up	04062	Chemokine signaling pathway
GO:0032496	response to lipopolysaccharide	25361	Vcam1	up	04064	NF-kappa B signaling pathway
GO:0032496	response to lipopolysaccharide	25361	Vcam1	up	05166	HTLV-I infection
GO:0032496	response to lipopolysaccharide	25361	Vcam1	up	05143	African trypanosomiasis
GO:0032496	response to lipopolysaccharide	25361	Vcam1	up	05144	Malaria
GO:0032496	response to lipopolysaccharide	25361	Vcam1	up	04514	Cell adhesion molecules (CAMs)
GO:0032496	response to lipopolysaccharide	25361	Vcam1	up	04670	Leukocyte transendothelial migration
GO:0032496	response to lipopolysaccharide	29665	P2rx7	up	04080	Neuroactive ligand-receptor interaction
GO:0032496	response to lipopolysaccharide	81687	Mmp9	up	05200	Pathways in cancer
GO:0032496	response to lipopolysaccharide	81687	Mmp9	up	05202	Transcriptional misregulation in cancer
GO:0032496	response to lipopolysaccharide	81687	Mmp9	up	05161	Hepatitis B
GO:0032496	response to lipopolysaccharide	81687	Mmp9	up	04670	Leukocyte transendothelial migration
GO:0032496	response to lipopolysaccharide	81687	Mmp9	up	05219	Bladder cancer
GO:0032496	response to lipopolysaccharide	309165	Rela	up	05160	Hepatitis C
GO:0032496	response to lipopolysaccharide	309165	Rela	up	04064	NF-kappa B signaling pathway
GO:0032496	response to lipopolysaccharide	309165	Rela	up	05134	Legionellosis
GO:0032496	response to lipopolysaccharide	309165	Rela	up	05200	Pathways in cancer
GO:0032496	response to lipopolysaccharide	309165	Rela	up	05202	Transcriptional misregulation in cancer
GO:0032496	response to lipopolysaccharide	309165	Rela	up	05152	Tuberculosis
GO:0032496	response to lipopolysaccharide	309165	Rela	up	05166	HTLV-I infection
GO:0032496	response to lipopolysaccharide	309165	Rela	up	04380	Osteoclast differentiation
GO:0032496	response to lipopolysaccharide	309165	Rela	up	05220	Chronic myeloid leukemia
GO:0032496	response to lipopolysaccharide	309165	Rela	up	05142	Chagas disease (American trypanosomiasis)
GO:0032496	response to lipopolysaccharide	309165	Rela	up	05132	Salmonella infection
GO:0032496	response to lipopolysaccharide	309165	Rela	up	04621	NOD-like receptor signaling pathway
GO:0032496	response to lipopolysaccharide	309165	Rela	up	04062	Chemokine signaling pathway
GO:0032496	response to lipopolysaccharide	309165	Rela	up	04010	MAPK signaling pathway
GO:0032496	response to lipopolysaccharide	309165	Rela	up	04066	HIF-1 signaling pathway
GO:0032496	response to lipopolysaccharide	309165	Rela	up	04620	Toll-like receptor signaling pathway
GO:0032496	response to lipopolysaccharide	309165	Rela	up	04151	PI3K-Akt signaling pathway
GO:0032496	response to lipopolysaccharide	309165	Rela	up	05162	Measles
GO:0032496	response to lipopolysaccharide	309165	Rela	up	05161	Hepatitis B
GO:0032496	response to lipopolysaccharide	309165	Rela	up	04660	T cell receptor signaling pathway
GO:0032496	response to lipopolysaccharide	309165	Rela	up	04623	Cytosolic DNA-sensing pathway
GO:0032496	response to lipopolysaccharide	309165	Rela	up	05221	Acute myeloid leukemia
GO:0032496	response to lipopolysaccharide	309165	Rela	up	05164	Influenza A
GO:0032496	response to lipopolysaccharide	309165	Rela	up	05169	Epstein-Barr virus infection
GO:0032496	response to lipopolysaccharide	309165	Rela	up	04920	Adipocytokine signaling pathway
GO:0032496	response to lipopolysaccharide	309165	Rela	up	05140	Leishmaniasis
GO:0032496	response to lipopolysaccharide	309165	Rela	up	05145	Toxoplasmosis
GO:0032496	response to lipopolysaccharide	309165	Rela	up	05215	Prostate cancer
GO:0032496	response to lipopolysaccharide	309165	Rela	up	05212	Pancreatic cancer
GO:0032496	response to lipopolysaccharide	309165	Rela	up	05133	Pertussis
GO:0032496	response to lipopolysaccharide	309165	Rela	up	04662	B cell receptor signaling pathway
GO:0032496	response to lipopolysaccharide	59103	Ptges	up	01100	Metabolic pathways
GO:0032496	response to lipopolysaccharide	316519	Slc11a1	up	04142	Lysosome
GO:0032496	response to lipopolysaccharide	316519	Slc11a1	up	04978	Mineral absorption
GO:0032496	response to lipopolysaccharide	25493	Nfkbia	up	05160	Hepatitis C
GO:0032496	response to lipopolysaccharide	25493	Nfkbia	up	04064	NF-kappa B signaling pathway
GO:0032496	response to lipopolysaccharide	25493	Nfkbia	up	05134	Legionellosis
GO:0032496	response to lipopolysaccharide	25493	Nfkbia	up	05200	Pathways in cancer
GO:0032496	response to lipopolysaccharide	25493	Nfkbia	up	05166	HTLV-I infection
GO:0032496	response to lipopolysaccharide	25493	Nfkbia	up	04380	Osteoclast differentiation
GO:0032496	response to lipopolysaccharide	25493	Nfkbia	up	05220	Chronic myeloid leukemia
GO:0032496	response to lipopolysaccharide	25493	Nfkbia	up	05142	Chagas disease (American trypanosomiasis)
GO:0032496	response to lipopolysaccharide	25493	Nfkbia	up	04621	NOD-like receptor signaling pathway
GO:0032496	response to lipopolysaccharide	25493	Nfkbia	up	04062	Chemokine signaling pathway
GO:0032496	response to lipopolysaccharide	25493	Nfkbia	up	04620	Toll-like receptor signaling pathway
GO:0032496	response to lipopolysaccharide	25493	Nfkbia	up	05162	Measles
GO:0032496	response to lipopolysaccharide	25493	Nfkbia	up	05161	Hepatitis B
GO:0032496	response to lipopolysaccharide	25493	Nfkbia	up	04660	T cell receptor signaling pathway
GO:0032496	response to lipopolysaccharide	25493	Nfkbia	up	04623	Cytosolic DNA-sensing pathway
GO:0032496	response to lipopolysaccharide	25493	Nfkbia	up	05164	Influenza A
GO:0032496	response to lipopolysaccharide	25493	Nfkbia	up	05169	Epstein-Barr virus infection
GO:0032496	response to lipopolysaccharide	25493	Nfkbia	up	04920	Adipocytokine signaling pathway
GO:0032496	response to lipopolysaccharide	25493	Nfkbia	up	05140	Leishmaniasis
GO:0032496	response to lipopolysaccharide	25493	Nfkbia	up	05145	Toxoplasmosis
GO:0032496	response to lipopolysaccharide	25493	Nfkbia	up	05215	Prostate cancer
GO:0032496	response to lipopolysaccharide	25493	Nfkbia	up	04662	B cell receptor signaling pathway
GO:0032496	response to lipopolysaccharide	25464	Icam1	up	04064	NF-kappa B signaling pathway
GO:0032496	response to lipopolysaccharide	25464	Icam1	up	05166	HTLV-I infection
GO:0032496	response to lipopolysaccharide	25464	Icam1	up	05143	African trypanosomiasis
GO:0032496	response to lipopolysaccharide	25464	Icam1	up	05144	Malaria
GO:0032496	response to lipopolysaccharide	25464	Icam1	up	04514	Cell adhesion molecules (CAMs)
GO:0032496	response to lipopolysaccharide	25464	Icam1	up	05164	Influenza A
GO:0032496	response to lipopolysaccharide	25464	Icam1	up	05169	Epstein-Barr virus infection
GO:0032496	response to lipopolysaccharide	25464	Icam1	up	04670	Leukocyte transendothelial migration
GO:0032496	response to lipopolysaccharide	25464	Icam1	up	05323	Rheumatoid arthritis
GO:0032496	response to lipopolysaccharide	171081	Csf2rb	up	04060	Cytokine-cytokine receptor interaction
GO:0032496	response to lipopolysaccharide	171081	Csf2rb	up	04630	Jak-STAT signaling pathway
GO:0006954	inflammatory response	116677	F2rl1	up	05143	African trypanosomiasis
GO:0006954	inflammatory response	116677	F2rl1	up	04080	Neuroactive ligand-receptor interaction
GO:0006954	inflammatory response	309165	Rela	up	05160	Hepatitis C
GO:0006954	inflammatory response	309165	Rela	up	04064	NF-kappa B signaling pathway
GO:0006954	inflammatory response	309165	Rela	up	05134	Legionellosis
GO:0006954	inflammatory response	309165	Rela	up	05200	Pathways in cancer
GO:0006954	inflammatory response	309165	Rela	up	05202	Transcriptional misregulation in cancer
GO:0006954	inflammatory response	309165	Rela	up	05152	Tuberculosis
GO:0006954	inflammatory response	309165	Rela	up	05166	HTLV-I infection
GO:0006954	inflammatory response	309165	Rela	up	04380	Osteoclast differentiation
GO:0006954	inflammatory response	309165	Rela	up	05220	Chronic myeloid leukemia
GO:0006954	inflammatory response	309165	Rela	up	05142	Chagas disease (American trypanosomiasis)
GO:0006954	inflammatory response	309165	Rela	up	05132	Salmonella infection
GO:0006954	inflammatory response	309165	Rela	up	04621	NOD-like receptor signaling pathway
GO:0006954	inflammatory response	309165	Rela	up	04062	Chemokine signaling pathway
GO:0006954	inflammatory response	309165	Rela	up	04010	MAPK signaling pathway
GO:0006954	inflammatory response	309165	Rela	up	04066	HIF-1 signaling pathway
GO:0006954	inflammatory response	309165	Rela	up	04620	Toll-like receptor signaling pathway
GO:0006954	inflammatory response	309165	Rela	up	04151	PI3K-Akt signaling pathway
GO:0006954	inflammatory response	309165	Rela	up	05162	Measles
GO:0006954	inflammatory response	309165	Rela	up	05161	Hepatitis B
GO:0006954	inflammatory response	309165	Rela	up	04660	T cell receptor signaling pathway
GO:0006954	inflammatory response	309165	Rela	up	04623	Cytosolic DNA-sensing pathway
GO:0006954	inflammatory response	309165	Rela	up	05221	Acute myeloid leukemia
GO:0006954	inflammatory response	309165	Rela	up	05164	Influenza A
GO:0006954	inflammatory response	309165	Rela	up	05169	Epstein-Barr virus infection
GO:0006954	inflammatory response	309165	Rela	up	04920	Adipocytokine signaling pathway
GO:0006954	inflammatory response	309165	Rela	up	05140	Leishmaniasis
GO:0006954	inflammatory response	309165	Rela	up	05145	Toxoplasmosis
GO:0006954	inflammatory response	309165	Rela	up	05215	Prostate cancer
GO:0006954	inflammatory response	309165	Rela	up	05212	Pancreatic cancer
GO:0006954	inflammatory response	309165	Rela	up	05133	Pertussis
GO:0006954	inflammatory response	309165	Rela	up	04662	B cell receptor signaling pathway
GO:0006954	inflammatory response	114105	Cxcl2	up	04060	Cytokine-cytokine receptor interaction
GO:0006954	inflammatory response	114105	Cxcl2	up	04064	NF-kappa B signaling pathway
GO:0006954	inflammatory response	114105	Cxcl2	up	05134	Legionellosis
GO:0006954	inflammatory response	114105	Cxcl2	up	05132	Salmonella infection
GO:0006954	inflammatory response	114105	Cxcl2	up	04621	NOD-like receptor signaling pathway
GO:0006954	inflammatory response	114105	Cxcl2	up	04062	Chemokine signaling pathway
GO:0006954	inflammatory response	316519	Slc11a1	up	04142	Lysosome
GO:0006954	inflammatory response	316519	Slc11a1	up	04978	Mineral absorption
GO:0006954	inflammatory response	29142	Vnn1	up	00770	Pantothenate and CoA biosynthesis
GO:0006954	inflammatory response	140914	Olr1	up	03320	PPAR signaling pathway
GO:0006954	inflammatory response	29665	P2rx7	up	04080	Neuroactive ligand-receptor interaction
GO:0006954	inflammatory response	303200	Map2k3	up	04010	MAPK signaling pathway
GO:0006954	inflammatory response	303200	Map2k3	up	04620	Toll-like receptor signaling pathway
GO:0006954	inflammatory response	303200	Map2k3	up	05164	Influenza A
GO:0006954	inflammatory response	303200	Map2k3	up	05169	Epstein-Barr virus infection
GO:0006954	inflammatory response	303200	Map2k3	up	05145	Toxoplasmosis
GO:0006954	inflammatory response	155140	Il23a	up	04060	Cytokine-cytokine receptor interaction
GO:0006954	inflammatory response	155140	Il23a	up	05152	Tuberculosis
GO:0006954	inflammatory response	155140	Il23a	up	04630	Jak-STAT signaling pathway
GO:0006954	inflammatory response	155140	Il23a	up	05323	Rheumatoid arthritis
GO:0006954	inflammatory response	155140	Il23a	up	05133	Pertussis
GO:0006954	inflammatory response	25544	Sele	up	05143	African trypanosomiasis
GO:0006954	inflammatory response	25544	Sele	up	05144	Malaria
GO:0006954	inflammatory response	25544	Sele	up	04514	Cell adhesion molecules (CAMs)
GO:0006954	inflammatory response	305236	Cxcl11	up	04060	Cytokine-cytokine receptor interaction
GO:0006954	inflammatory response	305236	Cxcl11	up	04062	Chemokine signaling pathway
GO:0006954	inflammatory response	305236	Cxcl11	up	04620	Toll-like receptor signaling pathway
GO:0006954	inflammatory response	24498	Il6	up	04060	Cytokine-cytokine receptor interaction
GO:0006954	inflammatory response	24498	Il6	up	05134	Legionellosis
GO:0006954	inflammatory response	24498	Il6	up	05200	Pathways in cancer
GO:0006954	inflammatory response	24498	Il6	up	05202	Transcriptional misregulation in cancer
GO:0006954	inflammatory response	24498	Il6	up	05152	Tuberculosis
GO:0006954	inflammatory response	24498	Il6	up	05166	HTLV-I infection
GO:0006954	inflammatory response	24498	Il6	up	05142	Chagas disease (American trypanosomiasis)
GO:0006954	inflammatory response	24498	Il6	up	05132	Salmonella infection
GO:0006954	inflammatory response	24498	Il6	up	04621	NOD-like receptor signaling pathway
GO:0006954	inflammatory response	24498	Il6	up	04630	Jak-STAT signaling pathway
GO:0006954	inflammatory response	24498	Il6	up	05143	African trypanosomiasis
GO:0006954	inflammatory response	24498	Il6	up	04066	HIF-1 signaling pathway
GO:0006954	inflammatory response	24498	Il6	up	04620	Toll-like receptor signaling pathway
GO:0006954	inflammatory response	24498	Il6	up	04151	PI3K-Akt signaling pathway
GO:0006954	inflammatory response	24498	Il6	up	05162	Measles
GO:0006954	inflammatory response	24498	Il6	up	05161	Hepatitis B
GO:0006954	inflammatory response	24498	Il6	up	04623	Cytosolic DNA-sensing pathway
GO:0006954	inflammatory response	24498	Il6	up	05144	Malaria
GO:0006954	inflammatory response	24498	Il6	up	05164	Influenza A
GO:0006954	inflammatory response	24498	Il6	up	05323	Rheumatoid arthritis
GO:0006954	inflammatory response	24498	Il6	up	05133	Pertussis
GO:0006954	inflammatory response	304005	Nfkbiz	up	05202	Transcriptional misregulation in cancer
GO:0007165	signal transduction	309452	Nfkb2	up	04064	NF-kappa B signaling pathway
GO:0007165	signal transduction	309452	Nfkb2	up	05134	Legionellosis
GO:0007165	signal transduction	309452	Nfkb2	up	05200	Pathways in cancer
GO:0007165	signal transduction	309452	Nfkb2	up	05166	HTLV-I infection
GO:0007165	signal transduction	309452	Nfkb2	up	04380	Osteoclast differentiation
GO:0007165	signal transduction	309452	Nfkb2	up	04010	MAPK signaling pathway
GO:0007165	signal transduction	309452	Nfkb2	up	05169	Epstein-Barr virus infection
GO:0007165	signal transduction	29516	Pde3b	up	00230	Purine metabolism
GO:0007165	signal transduction	361969	Fga	up	04610	Complement and coagulation cascades
GO:0007165	signal transduction	50686	Gsk3a	up	04062	Chemokine signaling pathway
GO:0007165	signal transduction	63885	Pde10a	up	00230	Purine metabolism
GO:0007165	signal transduction	81736	Nfkb1	up	05160	Hepatitis C
GO:0007165	signal transduction	81736	Nfkb1	up	04064	NF-kappa B signaling pathway
GO:0007165	signal transduction	81736	Nfkb1	up	05134	Legionellosis
GO:0007165	signal transduction	81736	Nfkb1	up	05200	Pathways in cancer
GO:0007165	signal transduction	81736	Nfkb1	up	05202	Transcriptional misregulation in cancer
GO:0007165	signal transduction	81736	Nfkb1	up	05152	Tuberculosis
GO:0007165	signal transduction	81736	Nfkb1	up	05166	HTLV-I infection
GO:0007165	signal transduction	81736	Nfkb1	up	04380	Osteoclast differentiation
GO:0007165	signal transduction	81736	Nfkb1	up	05220	Chronic myeloid leukemia
GO:0007165	signal transduction	81736	Nfkb1	up	05142	Chagas disease (American trypanosomiasis)
GO:0007165	signal transduction	81736	Nfkb1	up	05132	Salmonella infection
GO:0007165	signal transduction	81736	Nfkb1	up	04621	NOD-like receptor signaling pathway
GO:0007165	signal transduction	81736	Nfkb1	up	04062	Chemokine signaling pathway
GO:0007165	signal transduction	81736	Nfkb1	up	04010	MAPK signaling pathway
GO:0007165	signal transduction	81736	Nfkb1	up	04066	HIF-1 signaling pathway
GO:0007165	signal transduction	81736	Nfkb1	up	04620	Toll-like receptor signaling pathway
GO:0007165	signal transduction	81736	Nfkb1	up	04151	PI3K-Akt signaling pathway
GO:0007165	signal transduction	81736	Nfkb1	up	05162	Measles
GO:0007165	signal transduction	81736	Nfkb1	up	05161	Hepatitis B
GO:0007165	signal transduction	81736	Nfkb1	up	04660	T cell receptor signaling pathway
GO:0007165	signal transduction	81736	Nfkb1	up	04623	Cytosolic DNA-sensing pathway
GO:0007165	signal transduction	81736	Nfkb1	up	05221	Acute myeloid leukemia
GO:0007165	signal transduction	81736	Nfkb1	up	05164	Influenza A
GO:0007165	signal transduction	81736	Nfkb1	up	05169	Epstein-Barr virus infection
GO:0007165	signal transduction	81736	Nfkb1	up	04920	Adipocytokine signaling pathway
GO:0007165	signal transduction	81736	Nfkb1	up	05140	Leishmaniasis
GO:0007165	signal transduction	81736	Nfkb1	up	05145	Toxoplasmosis
GO:0007165	signal transduction	81736	Nfkb1	up	05215	Prostate cancer
GO:0007165	signal transduction	81736	Nfkb1	up	05212	Pancreatic cancer
GO:0007165	signal transduction	81736	Nfkb1	up	05133	Pertussis
GO:0007165	signal transduction	81736	Nfkb1	up	04662	B cell receptor signaling pathway
GO:0007165	signal transduction	171136	Cblb	up	05200	Pathways in cancer
GO:0007165	signal transduction	171136	Cblb	up	05220	Chronic myeloid leukemia
GO:0007165	signal transduction	171136	Cblb	up	04630	Jak-STAT signaling pathway
GO:0007165	signal transduction	171136	Cblb	up	05162	Measles
GO:0007165	signal transduction	171136	Cblb	up	04660	T cell receptor signaling pathway
GO:0007165	signal transduction	171136	Cblb	up	04012	ErbB signaling pathway
GO:0007165	signal transduction	171136	Cblb	up	05100	Bacterial invasion of epithelial cells
GO:0007165	signal transduction	291936	Hhip	up	05200	Pathways in cancer
GO:0007165	signal transduction	85249	Pex11a	up	04146	Peroxisome
GO:0007165	signal transduction	316256	Tnfrsf21	up	04060	Cytokine-cytokine receptor interaction
GO:0007165	signal transduction	29659	P2rx4	up	04080	Neuroactive ligand-receptor interaction
GO:0007165	signal transduction	310207	Sema5a	up	04360	Axon guidance
GO:0007165	signal transduction	24329	Egfr	up	05160	Hepatitis C
GO:0007165	signal transduction	24329	Egfr	up	04060	Cytokine-cytokine receptor interaction
GO:0007165	signal transduction	24329	Egfr	up	05200	Pathways in cancer
GO:0007165	signal transduction	24329	Egfr	up	04010	MAPK signaling pathway
GO:0007165	signal transduction	24329	Egfr	up	04066	HIF-1 signaling pathway
GO:0007165	signal transduction	24329	Egfr	up	04151	PI3K-Akt signaling pathway
GO:0007165	signal transduction	24329	Egfr	up	05215	Prostate cancer
GO:0007165	signal transduction	24329	Egfr	up	04012	ErbB signaling pathway
GO:0007165	signal transduction	24329	Egfr	up	05212	Pancreatic cancer
GO:0007165	signal transduction	24329	Egfr	up	05219	Bladder cancer
GO:0071347	cellular response to interleukin-1	81736	Nfkb1	up	05160	Hepatitis C
GO:0071347	cellular response to interleukin-1	81736	Nfkb1	up	04064	NF-kappa B signaling pathway
GO:0071347	cellular response to interleukin-1	81736	Nfkb1	up	05134	Legionellosis
GO:0071347	cellular response to interleukin-1	81736	Nfkb1	up	05200	Pathways in cancer
GO:0071347	cellular response to interleukin-1	81736	Nfkb1	up	05202	Transcriptional misregulation in cancer
GO:0071347	cellular response to interleukin-1	81736	Nfkb1	up	05152	Tuberculosis
GO:0071347	cellular response to interleukin-1	81736	Nfkb1	up	05166	HTLV-I infection
GO:0071347	cellular response to interleukin-1	81736	Nfkb1	up	04380	Osteoclast differentiation
GO:0071347	cellular response to interleukin-1	81736	Nfkb1	up	05220	Chronic myeloid leukemia
GO:0071347	cellular response to interleukin-1	81736	Nfkb1	up	05142	Chagas disease (American trypanosomiasis)
GO:0071347	cellular response to interleukin-1	81736	Nfkb1	up	05132	Salmonella infection
GO:0071347	cellular response to interleukin-1	81736	Nfkb1	up	04621	NOD-like receptor signaling pathway
GO:0071347	cellular response to interleukin-1	81736	Nfkb1	up	04062	Chemokine signaling pathway
GO:0071347	cellular response to interleukin-1	81736	Nfkb1	up	04010	MAPK signaling pathway
GO:0071347	cellular response to interleukin-1	81736	Nfkb1	up	04066	HIF-1 signaling pathway
GO:0071347	cellular response to interleukin-1	81736	Nfkb1	up	04620	Toll-like receptor signaling pathway
GO:0071347	cellular response to interleukin-1	81736	Nfkb1	up	04151	PI3K-Akt signaling pathway
GO:0071347	cellular response to interleukin-1	81736	Nfkb1	up	05162	Measles
GO:0071347	cellular response to interleukin-1	81736	Nfkb1	up	05161	Hepatitis B
GO:0071347	cellular response to interleukin-1	81736	Nfkb1	up	04660	T cell receptor signaling pathway
GO:0071347	cellular response to interleukin-1	81736	Nfkb1	up	04623	Cytosolic DNA-sensing pathway
GO:0071347	cellular response to interleukin-1	81736	Nfkb1	up	05221	Acute myeloid leukemia
GO:0071347	cellular response to interleukin-1	81736	Nfkb1	up	05164	Influenza A
GO:0071347	cellular response to interleukin-1	81736	Nfkb1	up	05169	Epstein-Barr virus infection
GO:0071347	cellular response to interleukin-1	81736	Nfkb1	up	04920	Adipocytokine signaling pathway
GO:0071347	cellular response to interleukin-1	81736	Nfkb1	up	05140	Leishmaniasis
GO:0071347	cellular response to interleukin-1	81736	Nfkb1	up	05145	Toxoplasmosis
GO:0071347	cellular response to interleukin-1	81736	Nfkb1	up	05215	Prostate cancer
GO:0071347	cellular response to interleukin-1	81736	Nfkb1	up	05212	Pancreatic cancer
GO:0071347	cellular response to interleukin-1	81736	Nfkb1	up	05133	Pertussis
GO:0071347	cellular response to interleukin-1	81736	Nfkb1	up	04662	B cell receptor signaling pathway
GO:0071347	cellular response to interleukin-1	81687	Mmp9	up	05200	Pathways in cancer
GO:0071347	cellular response to interleukin-1	81687	Mmp9	up	05202	Transcriptional misregulation in cancer
GO:0071347	cellular response to interleukin-1	81687	Mmp9	up	05161	Hepatitis B
GO:0071347	cellular response to interleukin-1	81687	Mmp9	up	04670	Leukocyte transendothelial migration
GO:0071347	cellular response to interleukin-1	81687	Mmp9	up	05219	Bladder cancer
GO:0071347	cellular response to interleukin-1	64468	Hyal2	up	01100	Metabolic pathways
GO:0071347	cellular response to interleukin-1	309165	Rela	up	05160	Hepatitis C
GO:0071347	cellular response to interleukin-1	309165	Rela	up	04064	NF-kappa B signaling pathway
GO:0071347	cellular response to interleukin-1	309165	Rela	up	05134	Legionellosis
GO:0071347	cellular response to interleukin-1	309165	Rela	up	05200	Pathways in cancer
GO:0071347	cellular response to interleukin-1	309165	Rela	up	05202	Transcriptional misregulation in cancer
GO:0071347	cellular response to interleukin-1	309165	Rela	up	05152	Tuberculosis
GO:0071347	cellular response to interleukin-1	309165	Rela	up	05166	HTLV-I infection
GO:0071347	cellular response to interleukin-1	309165	Rela	up	04380	Osteoclast differentiation
GO:0071347	cellular response to interleukin-1	309165	Rela	up	05220	Chronic myeloid leukemia
GO:0071347	cellular response to interleukin-1	309165	Rela	up	05142	Chagas disease (American trypanosomiasis)
GO:0071347	cellular response to interleukin-1	309165	Rela	up	05132	Salmonella infection
GO:0071347	cellular response to interleukin-1	309165	Rela	up	04621	NOD-like receptor signaling pathway
GO:0071347	cellular response to interleukin-1	309165	Rela	up	04062	Chemokine signaling pathway
GO:0071347	cellular response to interleukin-1	309165	Rela	up	04010	MAPK signaling pathway
GO:0071347	cellular response to interleukin-1	309165	Rela	up	04066	HIF-1 signaling pathway
GO:0071347	cellular response to interleukin-1	309165	Rela	up	04620	Toll-like receptor signaling pathway
GO:0071347	cellular response to interleukin-1	309165	Rela	up	04151	PI3K-Akt signaling pathway
GO:0071347	cellular response to interleukin-1	309165	Rela	up	05162	Measles
GO:0071347	cellular response to interleukin-1	309165	Rela	up	05161	Hepatitis B
GO:0071347	cellular response to interleukin-1	309165	Rela	up	04660	T cell receptor signaling pathway
GO:0071347	cellular response to interleukin-1	309165	Rela	up	04623	Cytosolic DNA-sensing pathway
GO:0071347	cellular response to interleukin-1	309165	Rela	up	05221	Acute myeloid leukemia
GO:0071347	cellular response to interleukin-1	309165	Rela	up	05164	Influenza A
GO:0071347	cellular response to interleukin-1	309165	Rela	up	05169	Epstein-Barr virus infection
GO:0071347	cellular response to interleukin-1	309165	Rela	up	04920	Adipocytokine signaling pathway
GO:0071347	cellular response to interleukin-1	309165	Rela	up	05140	Leishmaniasis
GO:0071347	cellular response to interleukin-1	309165	Rela	up	05145	Toxoplasmosis
GO:0071347	cellular response to interleukin-1	309165	Rela	up	05215	Prostate cancer
GO:0071347	cellular response to interleukin-1	309165	Rela	up	05212	Pancreatic cancer
GO:0071347	cellular response to interleukin-1	309165	Rela	up	05133	Pertussis
GO:0071347	cellular response to interleukin-1	309165	Rela	up	04662	B cell receptor signaling pathway
GO:0071347	cellular response to interleukin-1	114105	Cxcl2	up	04060	Cytokine-cytokine receptor interaction
GO:0071347	cellular response to interleukin-1	114105	Cxcl2	up	04064	NF-kappa B signaling pathway
GO:0071347	cellular response to interleukin-1	114105	Cxcl2	up	05134	Legionellosis
GO:0071347	cellular response to interleukin-1	114105	Cxcl2	up	05132	Salmonella infection
GO:0071347	cellular response to interleukin-1	114105	Cxcl2	up	04621	NOD-like receptor signaling pathway
GO:0071347	cellular response to interleukin-1	114105	Cxcl2	up	04062	Chemokine signaling pathway
GO:0071347	cellular response to interleukin-1	25464	Icam1	up	04064	NF-kappa B signaling pathway
GO:0071347	cellular response to interleukin-1	25464	Icam1	up	05166	HTLV-I infection
GO:0071347	cellular response to interleukin-1	25464	Icam1	up	05143	African trypanosomiasis
GO:0071347	cellular response to interleukin-1	25464	Icam1	up	05144	Malaria
GO:0071347	cellular response to interleukin-1	25464	Icam1	up	04514	Cell adhesion molecules (CAMs)
GO:0071347	cellular response to interleukin-1	25464	Icam1	up	05164	Influenza A
GO:0071347	cellular response to interleukin-1	25464	Icam1	up	05169	Epstein-Barr virus infection
GO:0071347	cellular response to interleukin-1	25464	Icam1	up	04670	Leukocyte transendothelial migration
GO:0071347	cellular response to interleukin-1	25464	Icam1	up	05323	Rheumatoid arthritis
GO:0045944	positive regulation of transcription from RNA polymerase II promoter	155140	Il23a	up	04060	Cytokine-cytokine receptor interaction
GO:0045944	positive regulation of transcription from RNA polymerase II promoter	155140	Il23a	up	05152	Tuberculosis
GO:0045944	positive regulation of transcription from RNA polymerase II promoter	155140	Il23a	up	04630	Jak-STAT signaling pathway
GO:0045944	positive regulation of transcription from RNA polymerase II promoter	155140	Il23a	up	05323	Rheumatoid arthritis
GO:0045944	positive regulation of transcription from RNA polymerase II promoter	155140	Il23a	up	05133	Pertussis
GO:0045944	positive regulation of transcription from RNA polymerase II promoter	29733	S1pr1	up	04080	Neuroactive ligand-receptor interaction
GO:0045944	positive regulation of transcription from RNA polymerase II promoter	294515	Foxo3	up	04062	Chemokine signaling pathway
GO:0045944	positive regulation of transcription from RNA polymerase II promoter	294515	Foxo3	up	04151	PI3K-Akt signaling pathway
GO:0045944	positive regulation of transcription from RNA polymerase II promoter	309165	Rela	up	05160	Hepatitis C
GO:0045944	positive regulation of transcription from RNA polymerase II promoter	309165	Rela	up	04064	NF-kappa B signaling pathway
GO:0045944	positive regulation of transcription from RNA polymerase II promoter	309165	Rela	up	05134	Legionellosis
GO:0045944	positive regulation of transcription from RNA polymerase II promoter	309165	Rela	up	05200	Pathways in cancer
GO:0045944	positive regulation of transcription from RNA polymerase II promoter	309165	Rela	up	05202	Transcriptional misregulation in cancer
GO:0045944	positive regulation of transcription from RNA polymerase II promoter	309165	Rela	up	05152	Tuberculosis
GO:0045944	positive regulation of transcription from RNA polymerase II promoter	309165	Rela	up	05166	HTLV-I infection
GO:0045944	positive regulation of transcription from RNA polymerase II promoter	309165	Rela	up	04380	Osteoclast differentiation
GO:0045944	positive regulation of transcription from RNA polymerase II promoter	309165	Rela	up	05220	Chronic myeloid leukemia
GO:0045944	positive regulation of transcription from RNA polymerase II promoter	309165	Rela	up	05142	Chagas disease (American trypanosomiasis)
GO:0045944	positive regulation of transcription from RNA polymerase II promoter	309165	Rela	up	05132	Salmonella infection
GO:0045944	positive regulation of transcription from RNA polymerase II promoter	309165	Rela	up	04621	NOD-like receptor signaling pathway
GO:0045944	positive regulation of transcription from RNA polymerase II promoter	309165	Rela	up	04062	Chemokine signaling pathway
GO:0045944	positive regulation of transcription from RNA polymerase II promoter	309165	Rela	up	04010	MAPK signaling pathway
GO:0045944	positive regulation of transcription from RNA polymerase II promoter	309165	Rela	up	04066	HIF-1 signaling pathway
GO:0045944	positive regulation of transcription from RNA polymerase II promoter	309165	Rela	up	04620	Toll-like receptor signaling pathway
GO:0045944	positive regulation of transcription from RNA polymerase II promoter	309165	Rela	up	04151	PI3K-Akt signaling pathway
GO:0045944	positive regulation of transcription from RNA polymerase II promoter	309165	Rela	up	05162	Measles
GO:0045944	positive regulation of transcription from RNA polymerase II promoter	309165	Rela	up	05161	Hepatitis B
GO:0045944	positive regulation of transcription from RNA polymerase II promoter	309165	Rela	up	04660	T cell receptor signaling pathway
GO:0045944	positive regulation of transcription from RNA polymerase II promoter	309165	Rela	up	04623	Cytosolic DNA-sensing pathway
GO:0045944	positive regulation of transcription from RNA polymerase II promoter	309165	Rela	up	05221	Acute myeloid leukemia
GO:0045944	positive regulation of transcription from RNA polymerase II promoter	309165	Rela	up	05164	Influenza A
GO:0045944	positive regulation of transcription from RNA polymerase II promoter	309165	Rela	up	05169	Epstein-Barr virus infection
GO:0045944	positive regulation of transcription from RNA polymerase II promoter	309165	Rela	up	04920	Adipocytokine signaling pathway
GO:0045944	positive regulation of transcription from RNA polymerase II promoter	309165	Rela	up	05140	Leishmaniasis
GO:0045944	positive regulation of transcription from RNA polymerase II promoter	309165	Rela	up	05145	Toxoplasmosis
GO:0045944	positive regulation of transcription from RNA polymerase II promoter	309165	Rela	up	05215	Prostate cancer
GO:0045944	positive regulation of transcription from RNA polymerase II promoter	309165	Rela	up	05212	Pancreatic cancer
GO:0045944	positive regulation of transcription from RNA polymerase II promoter	309165	Rela	up	05133	Pertussis
GO:0045944	positive regulation of transcription from RNA polymerase II promoter	309165	Rela	up	04662	B cell receptor signaling pathway
GO:0045944	positive regulation of transcription from RNA polymerase II promoter	50662	Runx1	up	05200	Pathways in cancer
GO:0045944	positive regulation of transcription from RNA polymerase II promoter	50662	Runx1	up	05202	Transcriptional misregulation in cancer
GO:0045944	positive regulation of transcription from RNA polymerase II promoter	50662	Runx1	up	05220	Chronic myeloid leukemia
GO:0045944	positive regulation of transcription from RNA polymerase II promoter	50662	Runx1	up	05221	Acute myeloid leukemia
GO:0045944	positive regulation of transcription from RNA polymerase II promoter	50686	Gsk3a	up	04062	Chemokine signaling pathway
GO:0045944	positive regulation of transcription from RNA polymerase II promoter	24498	Il6	up	04060	Cytokine-cytokine receptor interaction
GO:0045944	positive regulation of transcription from RNA polymerase II promoter	24498	Il6	up	05134	Legionellosis
GO:0045944	positive regulation of transcription from RNA polymerase II promoter	24498	Il6	up	05200	Pathways in cancer
GO:0045944	positive regulation of transcription from RNA polymerase II promoter	24498	Il6	up	05202	Transcriptional misregulation in cancer
GO:0045944	positive regulation of transcription from RNA polymerase II promoter	24498	Il6	up	05152	Tuberculosis
GO:0045944	positive regulation of transcription from RNA polymerase II promoter	24498	Il6	up	05166	HTLV-I infection
GO:0045944	positive regulation of transcription from RNA polymerase II promoter	24498	Il6	up	05142	Chagas disease (American trypanosomiasis)
GO:0045944	positive regulation of transcription from RNA polymerase II promoter	24498	Il6	up	05132	Salmonella infection
GO:0045944	positive regulation of transcription from RNA polymerase II promoter	24498	Il6	up	04621	NOD-like receptor signaling pathway
GO:0045944	positive regulation of transcription from RNA polymerase II promoter	24498	Il6	up	04630	Jak-STAT signaling pathway
GO:0045944	positive regulation of transcription from RNA polymerase II promoter	24498	Il6	up	05143	African trypanosomiasis
GO:0045944	positive regulation of transcription from RNA polymerase II promoter	24498	Il6	up	04066	HIF-1 signaling pathway
GO:0045944	positive regulation of transcription from RNA polymerase II promoter	24498	Il6	up	04620	Toll-like receptor signaling pathway
GO:0045944	positive regulation of transcription from RNA polymerase II promoter	24498	Il6	up	04151	PI3K-Akt signaling pathway
GO:0045944	positive regulation of transcription from RNA polymerase II promoter	24498	Il6	up	05162	Measles
GO:0045944	positive regulation of transcription from RNA polymerase II promoter	24498	Il6	up	05161	Hepatitis B
GO:0045944	positive regulation of transcription from RNA polymerase II promoter	24498	Il6	up	04623	Cytosolic DNA-sensing pathway
GO:0045944	positive regulation of transcription from RNA polymerase II promoter	24498	Il6	up	05144	Malaria
GO:0045944	positive regulation of transcription from RNA polymerase II promoter	24498	Il6	up	05164	Influenza A
GO:0045944	positive regulation of transcription from RNA polymerase II promoter	24498	Il6	up	05323	Rheumatoid arthritis
GO:0045944	positive regulation of transcription from RNA polymerase II promoter	24498	Il6	up	05133	Pertussis
GO:0045944	positive regulation of transcription from RNA polymerase II promoter	116677	F2rl1	up	05143	African trypanosomiasis
GO:0045944	positive regulation of transcription from RNA polymerase II promoter	116677	F2rl1	up	04080	Neuroactive ligand-receptor interaction
GO:0045944	positive regulation of transcription from RNA polymerase II promoter	81736	Nfkb1	up	05160	Hepatitis C
GO:0045944	positive regulation of transcription from RNA polymerase II promoter	81736	Nfkb1	up	04064	NF-kappa B signaling pathway
GO:0045944	positive regulation of transcription from RNA polymerase II promoter	81736	Nfkb1	up	05134	Legionellosis
GO:0045944	positive regulation of transcription from RNA polymerase II promoter	81736	Nfkb1	up	05200	Pathways in cancer
GO:0045944	positive regulation of transcription from RNA polymerase II promoter	81736	Nfkb1	up	05202	Transcriptional misregulation in cancer
GO:0045944	positive regulation of transcription from RNA polymerase II promoter	81736	Nfkb1	up	05152	Tuberculosis
GO:0045944	positive regulation of transcription from RNA polymerase II promoter	81736	Nfkb1	up	05166	HTLV-I infection
GO:0045944	positive regulation of transcription from RNA polymerase II promoter	81736	Nfkb1	up	04380	Osteoclast differentiation
GO:0045944	positive regulation of transcription from RNA polymerase II promoter	81736	Nfkb1	up	05220	Chronic myeloid leukemia
GO:0045944	positive regulation of transcription from RNA polymerase II promoter	81736	Nfkb1	up	05142	Chagas disease (American trypanosomiasis)
GO:0045944	positive regulation of transcription from RNA polymerase II promoter	81736	Nfkb1	up	05132	Salmonella infection
GO:0045944	positive regulation of transcription from RNA polymerase II promoter	81736	Nfkb1	up	04621	NOD-like receptor signaling pathway
GO:0045944	positive regulation of transcription from RNA polymerase II promoter	81736	Nfkb1	up	04062	Chemokine signaling pathway
GO:0045944	positive regulation of transcription from RNA polymerase II promoter	81736	Nfkb1	up	04010	MAPK signaling pathway
GO:0045944	positive regulation of transcription from RNA polymerase II promoter	81736	Nfkb1	up	04066	HIF-1 signaling pathway
GO:0045944	positive regulation of transcription from RNA polymerase II promoter	81736	Nfkb1	up	04620	Toll-like receptor signaling pathway
GO:0045944	positive regulation of transcription from RNA polymerase II promoter	81736	Nfkb1	up	04151	PI3K-Akt signaling pathway
GO:0045944	positive regulation of transcription from RNA polymerase II promoter	81736	Nfkb1	up	05162	Measles
GO:0045944	positive regulation of transcription from RNA polymerase II promoter	81736	Nfkb1	up	05161	Hepatitis B
GO:0045944	positive regulation of transcription from RNA polymerase II promoter	81736	Nfkb1	up	04660	T cell receptor signaling pathway
GO:0045944	positive regulation of transcription from RNA polymerase II promoter	81736	Nfkb1	up	04623	Cytosolic DNA-sensing pathway
GO:0045944	positive regulation of transcription from RNA polymerase II promoter	81736	Nfkb1	up	05221	Acute myeloid leukemia
GO:0045944	positive regulation of transcription from RNA polymerase II promoter	81736	Nfkb1	up	05164	Influenza A
GO:0045944	positive regulation of transcription from RNA polymerase II promoter	81736	Nfkb1	up	05169	Epstein-Barr virus infection
GO:0045944	positive regulation of transcription from RNA polymerase II promoter	81736	Nfkb1	up	04920	Adipocytokine signaling pathway
GO:0045944	positive regulation of transcription from RNA polymerase II promoter	81736	Nfkb1	up	05140	Leishmaniasis
GO:0045944	positive regulation of transcription from RNA polymerase II promoter	81736	Nfkb1	up	05145	Toxoplasmosis
GO:0045944	positive regulation of transcription from RNA polymerase II promoter	81736	Nfkb1	up	05215	Prostate cancer
GO:0045944	positive regulation of transcription from RNA polymerase II promoter	81736	Nfkb1	up	05212	Pancreatic cancer
GO:0045944	positive regulation of transcription from RNA polymerase II promoter	81736	Nfkb1	up	05133	Pertussis
GO:0045944	positive regulation of transcription from RNA polymerase II promoter	81736	Nfkb1	up	04662	B cell receptor signaling pathway
GO:0045944	positive regulation of transcription from RNA polymerase II promoter	58852	Nr1h3	up	05160	Hepatitis C
GO:0045944	positive regulation of transcription from RNA polymerase II promoter	58852	Nr1h3	up	03320	PPAR signaling pathway
GO:0045944	positive regulation of transcription from RNA polymerase II promoter	316737	Lpin2	up	01100	Metabolic pathways
GO:0045944	positive regulation of transcription from RNA polymerase II promoter	316737	Lpin2	up	00561	Glycerolipid metabolism
GO:0045944	positive regulation of transcription from RNA polymerase II promoter	316737	Lpin2	up	00564	Glycerophospholipid metabolism
GO:0045944	positive regulation of transcription from RNA polymerase II promoter	316519	Slc11a1	up	04142	Lysosome
GO:0045944	positive regulation of transcription from RNA polymerase II promoter	316519	Slc11a1	up	04978	Mineral absorption
GO:0045944	positive regulation of transcription from RNA polymerase II promoter	25493	Nfkbia	up	05160	Hepatitis C
GO:0045944	positive regulation of transcription from RNA polymerase II promoter	25493	Nfkbia	up	04064	NF-kappa B signaling pathway
GO:0045944	positive regulation of transcription from RNA polymerase II promoter	25493	Nfkbia	up	05134	Legionellosis
GO:0045944	positive regulation of transcription from RNA polymerase II promoter	25493	Nfkbia	up	05200	Pathways in cancer
GO:0045944	positive regulation of transcription from RNA polymerase II promoter	25493	Nfkbia	up	05166	HTLV-I infection
GO:0045944	positive regulation of transcription from RNA polymerase II promoter	25493	Nfkbia	up	04380	Osteoclast differentiation
GO:0045944	positive regulation of transcription from RNA polymerase II promoter	25493	Nfkbia	up	05220	Chronic myeloid leukemia
GO:0045944	positive regulation of transcription from RNA polymerase II promoter	25493	Nfkbia	up	05142	Chagas disease (American trypanosomiasis)
GO:0045944	positive regulation of transcription from RNA polymerase II promoter	25493	Nfkbia	up	04621	NOD-like receptor signaling pathway
GO:0045944	positive regulation of transcription from RNA polymerase II promoter	25493	Nfkbia	up	04062	Chemokine signaling pathway
GO:0045944	positive regulation of transcription from RNA polymerase II promoter	25493	Nfkbia	up	04620	Toll-like receptor signaling pathway
GO:0045944	positive regulation of transcription from RNA polymerase II promoter	25493	Nfkbia	up	05162	Measles
GO:0045944	positive regulation of transcription from RNA polymerase II promoter	25493	Nfkbia	up	05161	Hepatitis B
GO:0045944	positive regulation of transcription from RNA polymerase II promoter	25493	Nfkbia	up	04660	T cell receptor signaling pathway
GO:0045944	positive regulation of transcription from RNA polymerase II promoter	25493	Nfkbia	up	04623	Cytosolic DNA-sensing pathway
GO:0045944	positive regulation of transcription from RNA polymerase II promoter	25493	Nfkbia	up	05164	Influenza A
GO:0045944	positive regulation of transcription from RNA polymerase II promoter	25493	Nfkbia	up	05169	Epstein-Barr virus infection
GO:0045944	positive regulation of transcription from RNA polymerase II promoter	25493	Nfkbia	up	04920	Adipocytokine signaling pathway
GO:0045944	positive regulation of transcription from RNA polymerase II promoter	25493	Nfkbia	up	05140	Leishmaniasis
GO:0045944	positive regulation of transcription from RNA polymerase II promoter	25493	Nfkbia	up	05145	Toxoplasmosis
GO:0045944	positive regulation of transcription from RNA polymerase II promoter	25493	Nfkbia	up	05215	Prostate cancer
GO:0045944	positive regulation of transcription from RNA polymerase II promoter	25493	Nfkbia	up	04662	B cell receptor signaling pathway
GO:0045944	positive regulation of transcription from RNA polymerase II promoter	24873	Vdr	up	05152	Tuberculosis
GO:0045944	positive regulation of transcription from RNA polymerase II promoter	24873	Vdr	up	04978	Mineral absorption
GO:0045944	positive regulation of transcription from RNA polymerase II promoter	25620	Crem	up	05166	HTLV-I infection
GO:0045944	positive regulation of transcription from RNA polymerase II promoter	64468	Hyal2	up	01100	Metabolic pathways
GO:0045944	positive regulation of transcription from RNA polymerase II promoter	25747	Ppara	up	05160	Hepatitis C
GO:0045944	positive regulation of transcription from RNA polymerase II promoter	25747	Ppara	up	03320	PPAR signaling pathway
GO:0045944	positive regulation of transcription from RNA polymerase II promoter	25747	Ppara	up	04920	Adipocytokine signaling pathway
GO:0045944	positive regulation of transcription from RNA polymerase II promoter	58853	Nr4a3	up	05202	Transcriptional misregulation in cancer
GO:0045944	positive regulation of transcription from RNA polymerase II promoter	24253	Cebpb	up	05202	Transcriptional misregulation in cancer
GO:0045944	positive regulation of transcription from RNA polymerase II promoter	24253	Cebpb	up	05152	Tuberculosis
GO:0014070	response to organic cyclic compound	25445	Fosl1	up	05166	HTLV-I infection
GO:0014070	response to organic cyclic compound	25445	Fosl1	up	04380	Osteoclast differentiation
GO:0014070	response to organic cyclic compound	114851	Cdkn1a	up	05160	Hepatitis C
GO:0014070	response to organic cyclic compound	114851	Cdkn1a	up	05200	Pathways in cancer
GO:0014070	response to organic cyclic compound	114851	Cdkn1a	up	05202	Transcriptional misregulation in cancer
GO:0014070	response to organic cyclic compound	114851	Cdkn1a	up	05166	HTLV-I infection
GO:0014070	response to organic cyclic compound	114851	Cdkn1a	up	05220	Chronic myeloid leukemia
GO:0014070	response to organic cyclic compound	114851	Cdkn1a	up	04066	HIF-1 signaling pathway
GO:0014070	response to organic cyclic compound	114851	Cdkn1a	up	04151	PI3K-Akt signaling pathway
GO:0014070	response to organic cyclic compound	114851	Cdkn1a	up	05161	Hepatitis B
GO:0014070	response to organic cyclic compound	114851	Cdkn1a	up	05169	Epstein-Barr virus infection
GO:0014070	response to organic cyclic compound	114851	Cdkn1a	up	05215	Prostate cancer
GO:0014070	response to organic cyclic compound	114851	Cdkn1a	up	04012	ErbB signaling pathway
GO:0014070	response to organic cyclic compound	114851	Cdkn1a	up	05219	Bladder cancer
GO:0014070	response to organic cyclic compound	114851	Cdkn1a	up	04115	p53 signaling pathway
GO:0014070	response to organic cyclic compound	25260	Gstt1	up	00480	Glutathione metabolism
GO:0014070	response to organic cyclic compound	25260	Gstt1	up	05204	Chemical carcinogenesis
GO:0014070	response to organic cyclic compound	25260	Gstt1	up	00980	Metabolism of xenobiotics by cytochrome P450
GO:0014070	response to organic cyclic compound	25260	Gstt1	up	00982	Drug metabolism - cytochrome P450
GO:0014070	response to organic cyclic compound	29665	P2rx7	up	04080	Neuroactive ligand-receptor interaction
GO:0014070	response to organic cyclic compound	309165	Rela	up	05160	Hepatitis C
GO:0014070	response to organic cyclic compound	309165	Rela	up	04064	NF-kappa B signaling pathway
GO:0014070	response to organic cyclic compound	309165	Rela	up	05134	Legionellosis
GO:0014070	response to organic cyclic compound	309165	Rela	up	05200	Pathways in cancer
GO:0014070	response to organic cyclic compound	309165	Rela	up	05202	Transcriptional misregulation in cancer
GO:0014070	response to organic cyclic compound	309165	Rela	up	05152	Tuberculosis
GO:0014070	response to organic cyclic compound	309165	Rela	up	05166	HTLV-I infection
GO:0014070	response to organic cyclic compound	309165	Rela	up	04380	Osteoclast differentiation
GO:0014070	response to organic cyclic compound	309165	Rela	up	05220	Chronic myeloid leukemia
GO:0014070	response to organic cyclic compound	309165	Rela	up	05142	Chagas disease (American trypanosomiasis)
GO:0014070	response to organic cyclic compound	309165	Rela	up	05132	Salmonella infection
GO:0014070	response to organic cyclic compound	309165	Rela	up	04621	NOD-like receptor signaling pathway
GO:0014070	response to organic cyclic compound	309165	Rela	up	04062	Chemokine signaling pathway
GO:0014070	response to organic cyclic compound	309165	Rela	up	04010	MAPK signaling pathway
GO:0014070	response to organic cyclic compound	309165	Rela	up	04066	HIF-1 signaling pathway
GO:0014070	response to organic cyclic compound	309165	Rela	up	04620	Toll-like receptor signaling pathway
GO:0014070	response to organic cyclic compound	309165	Rela	up	04151	PI3K-Akt signaling pathway
GO:0014070	response to organic cyclic compound	309165	Rela	up	05162	Measles
GO:0014070	response to organic cyclic compound	309165	Rela	up	05161	Hepatitis B
GO:0014070	response to organic cyclic compound	309165	Rela	up	04660	T cell receptor signaling pathway
GO:0014070	response to organic cyclic compound	309165	Rela	up	04623	Cytosolic DNA-sensing pathway
GO:0014070	response to organic cyclic compound	309165	Rela	up	05221	Acute myeloid leukemia
GO:0014070	response to organic cyclic compound	309165	Rela	up	05164	Influenza A
GO:0014070	response to organic cyclic compound	309165	Rela	up	05169	Epstein-Barr virus infection
GO:0014070	response to organic cyclic compound	309165	Rela	up	04920	Adipocytokine signaling pathway
GO:0014070	response to organic cyclic compound	309165	Rela	up	05140	Leishmaniasis
GO:0014070	response to organic cyclic compound	309165	Rela	up	05145	Toxoplasmosis
GO:0014070	response to organic cyclic compound	309165	Rela	up	05215	Prostate cancer
GO:0014070	response to organic cyclic compound	309165	Rela	up	05212	Pancreatic cancer
GO:0014070	response to organic cyclic compound	309165	Rela	up	05133	Pertussis
GO:0014070	response to organic cyclic compound	309165	Rela	up	04662	B cell receptor signaling pathway
GO:0014070	response to organic cyclic compound	25464	Icam1	up	04064	NF-kappa B signaling pathway
GO:0014070	response to organic cyclic compound	25464	Icam1	up	05166	HTLV-I infection
GO:0014070	response to organic cyclic compound	25464	Icam1	up	05143	African trypanosomiasis
GO:0014070	response to organic cyclic compound	25464	Icam1	up	05144	Malaria
GO:0014070	response to organic cyclic compound	25464	Icam1	up	04514	Cell adhesion molecules (CAMs)
GO:0014070	response to organic cyclic compound	25464	Icam1	up	05164	Influenza A
GO:0014070	response to organic cyclic compound	25464	Icam1	up	05169	Epstein-Barr virus infection
GO:0014070	response to organic cyclic compound	25464	Icam1	up	04670	Leukocyte transendothelial migration
GO:0014070	response to organic cyclic compound	25464	Icam1	up	05323	Rheumatoid arthritis
GO:0014070	response to organic cyclic compound	24329	Egfr	up	05160	Hepatitis C
GO:0014070	response to organic cyclic compound	24329	Egfr	up	04060	Cytokine-cytokine receptor interaction
GO:0014070	response to organic cyclic compound	24329	Egfr	up	05200	Pathways in cancer
GO:0014070	response to organic cyclic compound	24329	Egfr	up	04010	MAPK signaling pathway
GO:0014070	response to organic cyclic compound	24329	Egfr	up	04066	HIF-1 signaling pathway
GO:0014070	response to organic cyclic compound	24329	Egfr	up	04151	PI3K-Akt signaling pathway
GO:0014070	response to organic cyclic compound	24329	Egfr	up	05215	Prostate cancer
GO:0014070	response to organic cyclic compound	24329	Egfr	up	04012	ErbB signaling pathway
GO:0014070	response to organic cyclic compound	24329	Egfr	up	05212	Pancreatic cancer
GO:0014070	response to organic cyclic compound	24329	Egfr	up	05219	Bladder cancer
GO:0014070	response to organic cyclic compound	24498	Il6	up	04060	Cytokine-cytokine receptor interaction
GO:0014070	response to organic cyclic compound	24498	Il6	up	05134	Legionellosis
GO:0014070	response to organic cyclic compound	24498	Il6	up	05200	Pathways in cancer
GO:0014070	response to organic cyclic compound	24498	Il6	up	05202	Transcriptional misregulation in cancer
GO:0014070	response to organic cyclic compound	24498	Il6	up	05152	Tuberculosis
GO:0014070	response to organic cyclic compound	24498	Il6	up	05166	HTLV-I infection
GO:0014070	response to organic cyclic compound	24498	Il6	up	05142	Chagas disease (American trypanosomiasis)
GO:0014070	response to organic cyclic compound	24498	Il6	up	05132	Salmonella infection
GO:0014070	response to organic cyclic compound	24498	Il6	up	04621	NOD-like receptor signaling pathway
GO:0014070	response to organic cyclic compound	24498	Il6	up	04630	Jak-STAT signaling pathway
GO:0014070	response to organic cyclic compound	24498	Il6	up	05143	African trypanosomiasis
GO:0014070	response to organic cyclic compound	24498	Il6	up	04066	HIF-1 signaling pathway
GO:0014070	response to organic cyclic compound	24498	Il6	up	04620	Toll-like receptor signaling pathway
GO:0014070	response to organic cyclic compound	24498	Il6	up	04151	PI3K-Akt signaling pathway
GO:0014070	response to organic cyclic compound	24498	Il6	up	05162	Measles
GO:0014070	response to organic cyclic compound	24498	Il6	up	05161	Hepatitis B
GO:0014070	response to organic cyclic compound	24498	Il6	up	04623	Cytosolic DNA-sensing pathway
GO:0014070	response to organic cyclic compound	24498	Il6	up	05144	Malaria
GO:0014070	response to organic cyclic compound	24498	Il6	up	05164	Influenza A
GO:0014070	response to organic cyclic compound	24498	Il6	up	05323	Rheumatoid arthritis
GO:0014070	response to organic cyclic compound	24498	Il6	up	05133	Pertussis
GO:0014070	response to organic cyclic compound	59103	Ptges	up	01100	Metabolic pathways
GO:0014070	response to organic cyclic compound	24450	Hmgcs2	up	01100	Metabolic pathways
GO:0014070	response to organic cyclic compound	24450	Hmgcs2	up	03320	PPAR signaling pathway
GO:0014070	response to organic cyclic compound	24450	Hmgcs2	up	00280	Valine, leucine and isoleucine degradation
GO:0014070	response to organic cyclic compound	24450	Hmgcs2	up	00650	Butanoate metabolism
GO:0014070	response to organic cyclic compound	24450	Hmgcs2	up	00072	Synthesis and degradation of ketone bodies
GO:0014070	response to organic cyclic compound	81687	Mmp9	up	05200	Pathways in cancer
GO:0014070	response to organic cyclic compound	81687	Mmp9	up	05202	Transcriptional misregulation in cancer
GO:0014070	response to organic cyclic compound	81687	Mmp9	up	05161	Hepatitis B
GO:0014070	response to organic cyclic compound	81687	Mmp9	up	04670	Leukocyte transendothelial migration
GO:0014070	response to organic cyclic compound	81687	Mmp9	up	05219	Bladder cancer
GO:0014070	response to organic cyclic compound	24404	Gpx1	up	00480	Glutathione metabolism
GO:0008285	negative regulation of cell proliferation	24498	Il6	up	04060	Cytokine-cytokine receptor interaction
GO:0008285	negative regulation of cell proliferation	24498	Il6	up	05134	Legionellosis
GO:0008285	negative regulation of cell proliferation	24498	Il6	up	05200	Pathways in cancer
GO:0008285	negative regulation of cell proliferation	24498	Il6	up	05202	Transcriptional misregulation in cancer
GO:0008285	negative regulation of cell proliferation	24498	Il6	up	05152	Tuberculosis
GO:0008285	negative regulation of cell proliferation	24498	Il6	up	05166	HTLV-I infection
GO:0008285	negative regulation of cell proliferation	24498	Il6	up	05142	Chagas disease (American trypanosomiasis)
GO:0008285	negative regulation of cell proliferation	24498	Il6	up	05132	Salmonella infection
GO:0008285	negative regulation of cell proliferation	24498	Il6	up	04621	NOD-like receptor signaling pathway
GO:0008285	negative regulation of cell proliferation	24498	Il6	up	04630	Jak-STAT signaling pathway
GO:0008285	negative regulation of cell proliferation	24498	Il6	up	05143	African trypanosomiasis
GO:0008285	negative regulation of cell proliferation	24498	Il6	up	04066	HIF-1 signaling pathway
GO:0008285	negative regulation of cell proliferation	24498	Il6	up	04620	Toll-like receptor signaling pathway
GO:0008285	negative regulation of cell proliferation	24498	Il6	up	04151	PI3K-Akt signaling pathway
GO:0008285	negative regulation of cell proliferation	24498	Il6	up	05162	Measles
GO:0008285	negative regulation of cell proliferation	24498	Il6	up	05161	Hepatitis B
GO:0008285	negative regulation of cell proliferation	24498	Il6	up	04623	Cytosolic DNA-sensing pathway
GO:0008285	negative regulation of cell proliferation	24498	Il6	up	05144	Malaria
GO:0008285	negative regulation of cell proliferation	24498	Il6	up	05164	Influenza A
GO:0008285	negative regulation of cell proliferation	24498	Il6	up	05323	Rheumatoid arthritis
GO:0008285	negative regulation of cell proliferation	24498	Il6	up	05133	Pertussis
GO:0008285	negative regulation of cell proliferation	24873	Vdr	up	05152	Tuberculosis
GO:0008285	negative regulation of cell proliferation	24873	Vdr	up	04978	Mineral absorption
GO:0008285	negative regulation of cell proliferation	140635	Flt3	up	04060	Cytokine-cytokine receptor interaction
GO:0008285	negative regulation of cell proliferation	140635	Flt3	up	05200	Pathways in cancer
GO:0008285	negative regulation of cell proliferation	140635	Flt3	up	05202	Transcriptional misregulation in cancer
GO:0008285	negative regulation of cell proliferation	140635	Flt3	up	05221	Acute myeloid leukemia
GO:0008285	negative regulation of cell proliferation	81809	Tgfb2	up	04060	Cytokine-cytokine receptor interaction
GO:0008285	negative regulation of cell proliferation	81809	Tgfb2	up	05200	Pathways in cancer
GO:0008285	negative regulation of cell proliferation	81809	Tgfb2	up	05152	Tuberculosis
GO:0008285	negative regulation of cell proliferation	81809	Tgfb2	up	05166	HTLV-I infection
GO:0008285	negative regulation of cell proliferation	81809	Tgfb2	up	04380	Osteoclast differentiation
GO:0008285	negative regulation of cell proliferation	81809	Tgfb2	up	05220	Chronic myeloid leukemia
GO:0008285	negative regulation of cell proliferation	81809	Tgfb2	up	05142	Chagas disease (American trypanosomiasis)
GO:0008285	negative regulation of cell proliferation	81809	Tgfb2	up	04010	MAPK signaling pathway
GO:0008285	negative regulation of cell proliferation	81809	Tgfb2	up	05161	Hepatitis B
GO:0008285	negative regulation of cell proliferation	81809	Tgfb2	up	05144	Malaria
GO:0008285	negative regulation of cell proliferation	81809	Tgfb2	up	05140	Leishmaniasis
GO:0008285	negative regulation of cell proliferation	81809	Tgfb2	up	04350	TGF-beta signaling pathway
GO:0008285	negative regulation of cell proliferation	81809	Tgfb2	up	05145	Toxoplasmosis
GO:0008285	negative regulation of cell proliferation	81809	Tgfb2	up	05323	Rheumatoid arthritis
GO:0008285	negative regulation of cell proliferation	81809	Tgfb2	up	05212	Pancreatic cancer
GO:0008285	negative regulation of cell proliferation	59103	Ptges	up	01100	Metabolic pathways
GO:0008285	negative regulation of cell proliferation	114851	Cdkn1a	up	05160	Hepatitis C
GO:0008285	negative regulation of cell proliferation	114851	Cdkn1a	up	05200	Pathways in cancer
GO:0008285	negative regulation of cell proliferation	114851	Cdkn1a	up	05202	Transcriptional misregulation in cancer
GO:0008285	negative regulation of cell proliferation	114851	Cdkn1a	up	05166	HTLV-I infection
GO:0008285	negative regulation of cell proliferation	114851	Cdkn1a	up	05220	Chronic myeloid leukemia
GO:0008285	negative regulation of cell proliferation	114851	Cdkn1a	up	04066	HIF-1 signaling pathway
GO:0008285	negative regulation of cell proliferation	114851	Cdkn1a	up	04151	PI3K-Akt signaling pathway
GO:0008285	negative regulation of cell proliferation	114851	Cdkn1a	up	05161	Hepatitis B
GO:0008285	negative regulation of cell proliferation	114851	Cdkn1a	up	05169	Epstein-Barr virus infection
GO:0008285	negative regulation of cell proliferation	114851	Cdkn1a	up	05215	Prostate cancer
GO:0008285	negative regulation of cell proliferation	114851	Cdkn1a	up	04012	ErbB signaling pathway
GO:0008285	negative regulation of cell proliferation	114851	Cdkn1a	up	05219	Bladder cancer
GO:0008285	negative regulation of cell proliferation	114851	Cdkn1a	up	04115	p53 signaling pathway
GO:0008285	negative regulation of cell proliferation	25445	Fosl1	up	05166	HTLV-I infection
GO:0008285	negative regulation of cell proliferation	25445	Fosl1	up	04380	Osteoclast differentiation
GO:0008285	negative regulation of cell proliferation	50646	Ptk2b	up	04062	Chemokine signaling pathway
GO:0008285	negative regulation of cell proliferation	50646	Ptk2b	up	05161	Hepatitis B
GO:0008285	negative regulation of cell proliferation	50646	Ptk2b	up	04670	Leukocyte transendothelial migration
GO:0033590	response to cobalamin	25044	Sds	up	01100	Metabolic pathways
GO:0033590	response to cobalamin	25044	Sds	up	00260	Glycine, serine and threonine metabolism
GO:0033590	response to cobalamin	25044	Sds	up	00270	Cysteine and methionine metabolism
GO:0033590	response to cobalamin	25044	Sds	up	01230	Biosynthesis of amino acids
GO:0033590	response to cobalamin	24329	Egfr	up	05160	Hepatitis C
GO:0033590	response to cobalamin	24329	Egfr	up	04060	Cytokine-cytokine receptor interaction
GO:0033590	response to cobalamin	24329	Egfr	up	05200	Pathways in cancer
GO:0033590	response to cobalamin	24329	Egfr	up	04010	MAPK signaling pathway
GO:0033590	response to cobalamin	24329	Egfr	up	04066	HIF-1 signaling pathway
GO:0033590	response to cobalamin	24329	Egfr	up	04151	PI3K-Akt signaling pathway
GO:0033590	response to cobalamin	24329	Egfr	up	05215	Prostate cancer
GO:0033590	response to cobalamin	24329	Egfr	up	04012	ErbB signaling pathway
GO:0033590	response to cobalamin	24329	Egfr	up	05212	Pancreatic cancer
GO:0033590	response to cobalamin	24329	Egfr	up	05219	Bladder cancer
GO:0033590	response to cobalamin	309165	Rela	up	05160	Hepatitis C
GO:0033590	response to cobalamin	309165	Rela	up	04064	NF-kappa B signaling pathway
GO:0033590	response to cobalamin	309165	Rela	up	05134	Legionellosis
GO:0033590	response to cobalamin	309165	Rela	up	05200	Pathways in cancer
GO:0033590	response to cobalamin	309165	Rela	up	05202	Transcriptional misregulation in cancer
GO:0033590	response to cobalamin	309165	Rela	up	05152	Tuberculosis
GO:0033590	response to cobalamin	309165	Rela	up	05166	HTLV-I infection
GO:0033590	response to cobalamin	309165	Rela	up	04380	Osteoclast differentiation
GO:0033590	response to cobalamin	309165	Rela	up	05220	Chronic myeloid leukemia
GO:0033590	response to cobalamin	309165	Rela	up	05142	Chagas disease (American trypanosomiasis)
GO:0033590	response to cobalamin	309165	Rela	up	05132	Salmonella infection
GO:0033590	response to cobalamin	309165	Rela	up	04621	NOD-like receptor signaling pathway
GO:0033590	response to cobalamin	309165	Rela	up	04062	Chemokine signaling pathway
GO:0033590	response to cobalamin	309165	Rela	up	04010	MAPK signaling pathway
GO:0033590	response to cobalamin	309165	Rela	up	04066	HIF-1 signaling pathway
GO:0033590	response to cobalamin	309165	Rela	up	04620	Toll-like receptor signaling pathway
GO:0033590	response to cobalamin	309165	Rela	up	04151	PI3K-Akt signaling pathway
GO:0033590	response to cobalamin	309165	Rela	up	05162	Measles
GO:0033590	response to cobalamin	309165	Rela	up	05161	Hepatitis B
GO:0033590	response to cobalamin	309165	Rela	up	04660	T cell receptor signaling pathway
GO:0033590	response to cobalamin	309165	Rela	up	04623	Cytosolic DNA-sensing pathway
GO:0033590	response to cobalamin	309165	Rela	up	05221	Acute myeloid leukemia
GO:0033590	response to cobalamin	309165	Rela	up	05164	Influenza A
GO:0033590	response to cobalamin	309165	Rela	up	05169	Epstein-Barr virus infection
GO:0033590	response to cobalamin	309165	Rela	up	04920	Adipocytokine signaling pathway
GO:0033590	response to cobalamin	309165	Rela	up	05140	Leishmaniasis
GO:0033590	response to cobalamin	309165	Rela	up	05145	Toxoplasmosis
GO:0033590	response to cobalamin	309165	Rela	up	05215	Prostate cancer
GO:0033590	response to cobalamin	309165	Rela	up	05212	Pancreatic cancer
GO:0033590	response to cobalamin	309165	Rela	up	05133	Pertussis
GO:0033590	response to cobalamin	309165	Rela	up	04662	B cell receptor signaling pathway
GO:0042493	response to drug	25464	Icam1	up	04064	NF-kappa B signaling pathway
GO:0042493	response to drug	25464	Icam1	up	05166	HTLV-I infection
GO:0042493	response to drug	25464	Icam1	up	05143	African trypanosomiasis
GO:0042493	response to drug	25464	Icam1	up	05144	Malaria
GO:0042493	response to drug	25464	Icam1	up	04514	Cell adhesion molecules (CAMs)
GO:0042493	response to drug	25464	Icam1	up	05164	Influenza A
GO:0042493	response to drug	25464	Icam1	up	05169	Epstein-Barr virus infection
GO:0042493	response to drug	25464	Icam1	up	04670	Leukocyte transendothelial migration
GO:0042493	response to drug	25464	Icam1	up	05323	Rheumatoid arthritis
GO:0042493	response to drug	24498	Il6	up	04060	Cytokine-cytokine receptor interaction
GO:0042493	response to drug	24498	Il6	up	05134	Legionellosis
GO:0042493	response to drug	24498	Il6	up	05200	Pathways in cancer
GO:0042493	response to drug	24498	Il6	up	05202	Transcriptional misregulation in cancer
GO:0042493	response to drug	24498	Il6	up	05152	Tuberculosis
GO:0042493	response to drug	24498	Il6	up	05166	HTLV-I infection
GO:0042493	response to drug	24498	Il6	up	05142	Chagas disease (American trypanosomiasis)
GO:0042493	response to drug	24498	Il6	up	05132	Salmonella infection
GO:0042493	response to drug	24498	Il6	up	04621	NOD-like receptor signaling pathway
GO:0042493	response to drug	24498	Il6	up	04630	Jak-STAT signaling pathway
GO:0042493	response to drug	24498	Il6	up	05143	African trypanosomiasis
GO:0042493	response to drug	24498	Il6	up	04066	HIF-1 signaling pathway
GO:0042493	response to drug	24498	Il6	up	04620	Toll-like receptor signaling pathway
GO:0042493	response to drug	24498	Il6	up	04151	PI3K-Akt signaling pathway
GO:0042493	response to drug	24498	Il6	up	05162	Measles
GO:0042493	response to drug	24498	Il6	up	05161	Hepatitis B
GO:0042493	response to drug	24498	Il6	up	04623	Cytosolic DNA-sensing pathway
GO:0042493	response to drug	24498	Il6	up	05144	Malaria
GO:0042493	response to drug	24498	Il6	up	05164	Influenza A
GO:0042493	response to drug	24498	Il6	up	05323	Rheumatoid arthritis
GO:0042493	response to drug	24498	Il6	up	05133	Pertussis
GO:0042493	response to drug	25445	Fosl1	up	05166	HTLV-I infection
GO:0042493	response to drug	25445	Fosl1	up	04380	Osteoclast differentiation
GO:0042493	response to drug	25260	Gstt1	up	00480	Glutathione metabolism
GO:0042493	response to drug	25260	Gstt1	up	05204	Chemical carcinogenesis
GO:0042493	response to drug	25260	Gstt1	up	00980	Metabolism of xenobiotics by cytochrome P450
GO:0042493	response to drug	25260	Gstt1	up	00982	Drug metabolism - cytochrome P450
GO:0042493	response to drug	24450	Hmgcs2	up	01100	Metabolic pathways
GO:0042493	response to drug	24450	Hmgcs2	up	03320	PPAR signaling pathway
GO:0042493	response to drug	24450	Hmgcs2	up	00280	Valine, leucine and isoleucine degradation
GO:0042493	response to drug	24450	Hmgcs2	up	00650	Butanoate metabolism
GO:0042493	response to drug	24450	Hmgcs2	up	00072	Synthesis and degradation of ketone bodies
GO:0042493	response to drug	81663	Gna12	up	04010	MAPK signaling pathway
GO:0042493	response to drug	24165	Ada	up	01100	Metabolic pathways
GO:0042493	response to drug	24165	Ada	up	00230	Purine metabolism
GO:0042493	response to drug	289754	Xbp1	up	05166	HTLV-I infection
GO:0042493	response to drug	289754	Xbp1	up	04141	Protein processing in endoplasmic reticulum
GO:0042493	response to drug	50646	Ptk2b	up	04062	Chemokine signaling pathway
GO:0042493	response to drug	50646	Ptk2b	up	05161	Hepatitis B
GO:0042493	response to drug	50646	Ptk2b	up	04670	Leukocyte transendothelial migration
GO:0042493	response to drug	309165	Rela	up	05160	Hepatitis C
GO:0042493	response to drug	309165	Rela	up	04064	NF-kappa B signaling pathway
GO:0042493	response to drug	309165	Rela	up	05134	Legionellosis
GO:0042493	response to drug	309165	Rela	up	05200	Pathways in cancer
GO:0042493	response to drug	309165	Rela	up	05202	Transcriptional misregulation in cancer
GO:0042493	response to drug	309165	Rela	up	05152	Tuberculosis
GO:0042493	response to drug	309165	Rela	up	05166	HTLV-I infection
GO:0042493	response to drug	309165	Rela	up	04380	Osteoclast differentiation
GO:0042493	response to drug	309165	Rela	up	05220	Chronic myeloid leukemia
GO:0042493	response to drug	309165	Rela	up	05142	Chagas disease (American trypanosomiasis)
GO:0042493	response to drug	309165	Rela	up	05132	Salmonella infection
GO:0042493	response to drug	309165	Rela	up	04621	NOD-like receptor signaling pathway
GO:0042493	response to drug	309165	Rela	up	04062	Chemokine signaling pathway
GO:0042493	response to drug	309165	Rela	up	04010	MAPK signaling pathway
GO:0042493	response to drug	309165	Rela	up	04066	HIF-1 signaling pathway
GO:0042493	response to drug	309165	Rela	up	04620	Toll-like receptor signaling pathway
GO:0042493	response to drug	309165	Rela	up	04151	PI3K-Akt signaling pathway
GO:0042493	response to drug	309165	Rela	up	05162	Measles
GO:0042493	response to drug	309165	Rela	up	05161	Hepatitis B
GO:0042493	response to drug	309165	Rela	up	04660	T cell receptor signaling pathway
GO:0042493	response to drug	309165	Rela	up	04623	Cytosolic DNA-sensing pathway
GO:0042493	response to drug	309165	Rela	up	05221	Acute myeloid leukemia
GO:0042493	response to drug	309165	Rela	up	05164	Influenza A
GO:0042493	response to drug	309165	Rela	up	05169	Epstein-Barr virus infection
GO:0042493	response to drug	309165	Rela	up	04920	Adipocytokine signaling pathway
GO:0042493	response to drug	309165	Rela	up	05140	Leishmaniasis
GO:0042493	response to drug	309165	Rela	up	05145	Toxoplasmosis
GO:0042493	response to drug	309165	Rela	up	05215	Prostate cancer
GO:0042493	response to drug	309165	Rela	up	05212	Pancreatic cancer
GO:0042493	response to drug	309165	Rela	up	05133	Pertussis
GO:0042493	response to drug	309165	Rela	up	04662	B cell receptor signaling pathway
GO:0042493	response to drug	29665	P2rx7	up	04080	Neuroactive ligand-receptor interaction
GO:0042493	response to drug	81809	Tgfb2	up	04060	Cytokine-cytokine receptor interaction
GO:0042493	response to drug	81809	Tgfb2	up	05200	Pathways in cancer
GO:0042493	response to drug	81809	Tgfb2	up	05152	Tuberculosis
GO:0042493	response to drug	81809	Tgfb2	up	05166	HTLV-I infection
GO:0042493	response to drug	81809	Tgfb2	up	04380	Osteoclast differentiation
GO:0042493	response to drug	81809	Tgfb2	up	05220	Chronic myeloid leukemia
GO:0042493	response to drug	81809	Tgfb2	up	05142	Chagas disease (American trypanosomiasis)
GO:0042493	response to drug	81809	Tgfb2	up	04010	MAPK signaling pathway
GO:0042493	response to drug	81809	Tgfb2	up	05161	Hepatitis B
GO:0042493	response to drug	81809	Tgfb2	up	05144	Malaria
GO:0042493	response to drug	81809	Tgfb2	up	05140	Leishmaniasis
GO:0042493	response to drug	81809	Tgfb2	up	04350	TGF-beta signaling pathway
GO:0042493	response to drug	81809	Tgfb2	up	05145	Toxoplasmosis
GO:0042493	response to drug	81809	Tgfb2	up	05323	Rheumatoid arthritis
GO:0042493	response to drug	81809	Tgfb2	up	05212	Pancreatic cancer
GO:0042493	response to drug	114851	Cdkn1a	up	05160	Hepatitis C
GO:0042493	response to drug	114851	Cdkn1a	up	05200	Pathways in cancer
GO:0042493	response to drug	114851	Cdkn1a	up	05202	Transcriptional misregulation in cancer
GO:0042493	response to drug	114851	Cdkn1a	up	05166	HTLV-I infection
GO:0042493	response to drug	114851	Cdkn1a	up	05220	Chronic myeloid leukemia
GO:0042493	response to drug	114851	Cdkn1a	up	04066	HIF-1 signaling pathway
GO:0042493	response to drug	114851	Cdkn1a	up	04151	PI3K-Akt signaling pathway
GO:0042493	response to drug	114851	Cdkn1a	up	05161	Hepatitis B
GO:0042493	response to drug	114851	Cdkn1a	up	05169	Epstein-Barr virus infection
GO:0042493	response to drug	114851	Cdkn1a	up	05215	Prostate cancer
GO:0042493	response to drug	114851	Cdkn1a	up	04012	ErbB signaling pathway
GO:0042493	response to drug	114851	Cdkn1a	up	05219	Bladder cancer
GO:0042493	response to drug	114851	Cdkn1a	up	04115	p53 signaling pathway
GO:0042493	response to drug	81687	Mmp9	up	05200	Pathways in cancer
GO:0042493	response to drug	81687	Mmp9	up	05202	Transcriptional misregulation in cancer
GO:0042493	response to drug	81687	Mmp9	up	05161	Hepatitis B
GO:0042493	response to drug	81687	Mmp9	up	04670	Leukocyte transendothelial migration
GO:0042493	response to drug	81687	Mmp9	up	05219	Bladder cancer
GO:0042493	response to drug	117544	Ppat	up	01100	Metabolic pathways
GO:0042493	response to drug	117544	Ppat	up	00230	Purine metabolism
GO:0042493	response to drug	117544	Ppat	up	00250	Alanine, aspartate and glutamate metabolism
GO:0006468	protein phosphorylation	50686	Gsk3a	up	04062	Chemokine signaling pathway
GO:0006468	protein phosphorylation	81809	Tgfb2	up	04060	Cytokine-cytokine receptor interaction
GO:0006468	protein phosphorylation	81809	Tgfb2	up	05200	Pathways in cancer
GO:0006468	protein phosphorylation	81809	Tgfb2	up	05152	Tuberculosis
GO:0006468	protein phosphorylation	81809	Tgfb2	up	05166	HTLV-I infection
GO:0006468	protein phosphorylation	81809	Tgfb2	up	04380	Osteoclast differentiation
GO:0006468	protein phosphorylation	81809	Tgfb2	up	05220	Chronic myeloid leukemia
GO:0006468	protein phosphorylation	81809	Tgfb2	up	05142	Chagas disease (American trypanosomiasis)
GO:0006468	protein phosphorylation	81809	Tgfb2	up	04010	MAPK signaling pathway
GO:0006468	protein phosphorylation	81809	Tgfb2	up	05161	Hepatitis B
GO:0006468	protein phosphorylation	81809	Tgfb2	up	05144	Malaria
GO:0006468	protein phosphorylation	81809	Tgfb2	up	05140	Leishmaniasis
GO:0006468	protein phosphorylation	81809	Tgfb2	up	04350	TGF-beta signaling pathway
GO:0006468	protein phosphorylation	81809	Tgfb2	up	05145	Toxoplasmosis
GO:0006468	protein phosphorylation	81809	Tgfb2	up	05323	Rheumatoid arthritis
GO:0006468	protein phosphorylation	81809	Tgfb2	up	05212	Pancreatic cancer
GO:0006468	protein phosphorylation	140635	Flt3	up	04060	Cytokine-cytokine receptor interaction
GO:0006468	protein phosphorylation	140635	Flt3	up	05200	Pathways in cancer
GO:0006468	protein phosphorylation	140635	Flt3	up	05202	Transcriptional misregulation in cancer
GO:0006468	protein phosphorylation	140635	Flt3	up	05221	Acute myeloid leukemia
GO:0006468	protein phosphorylation	313022	Map3k6	up	04010	MAPK signaling pathway
GO:0006468	protein phosphorylation	24649	Pim1	up	04630	Jak-STAT signaling pathway
GO:0006468	protein phosphorylation	24649	Pim1	up	05221	Acute myeloid leukemia
GO:0006468	protein phosphorylation	29517	Sgk1	up	04151	PI3K-Akt signaling pathway
GO:0006468	protein phosphorylation	50646	Ptk2b	up	04062	Chemokine signaling pathway
GO:0006468	protein phosphorylation	50646	Ptk2b	up	05161	Hepatitis B
GO:0006468	protein phosphorylation	50646	Ptk2b	up	04670	Leukocyte transendothelial migration
GO:0006468	protein phosphorylation	29665	P2rx7	up	04080	Neuroactive ligand-receptor interaction
GO:0042542	response to hydrogen peroxide	58853	Nr4a3	up	05202	Transcriptional misregulation in cancer
GO:0042542	response to hydrogen peroxide	25445	Fosl1	up	05166	HTLV-I infection
GO:0042542	response to hydrogen peroxide	25445	Fosl1	up	04380	Osteoclast differentiation
GO:0042542	response to hydrogen peroxide	50646	Ptk2b	up	04062	Chemokine signaling pathway
GO:0042542	response to hydrogen peroxide	50646	Ptk2b	up	05161	Hepatitis B
GO:0042542	response to hydrogen peroxide	50646	Ptk2b	up	04670	Leukocyte transendothelial migration
GO:0042542	response to hydrogen peroxide	309165	Rela	up	05160	Hepatitis C
GO:0042542	response to hydrogen peroxide	309165	Rela	up	04064	NF-kappa B signaling pathway
GO:0042542	response to hydrogen peroxide	309165	Rela	up	05134	Legionellosis
GO:0042542	response to hydrogen peroxide	309165	Rela	up	05200	Pathways in cancer
GO:0042542	response to hydrogen peroxide	309165	Rela	up	05202	Transcriptional misregulation in cancer
GO:0042542	response to hydrogen peroxide	309165	Rela	up	05152	Tuberculosis
GO:0042542	response to hydrogen peroxide	309165	Rela	up	05166	HTLV-I infection
GO:0042542	response to hydrogen peroxide	309165	Rela	up	04380	Osteoclast differentiation
GO:0042542	response to hydrogen peroxide	309165	Rela	up	05220	Chronic myeloid leukemia
GO:0042542	response to hydrogen peroxide	309165	Rela	up	05142	Chagas disease (American trypanosomiasis)
GO:0042542	response to hydrogen peroxide	309165	Rela	up	05132	Salmonella infection
GO:0042542	response to hydrogen peroxide	309165	Rela	up	04621	NOD-like receptor signaling pathway
GO:0042542	response to hydrogen peroxide	309165	Rela	up	04062	Chemokine signaling pathway
GO:0042542	response to hydrogen peroxide	309165	Rela	up	04010	MAPK signaling pathway
GO:0042542	response to hydrogen peroxide	309165	Rela	up	04066	HIF-1 signaling pathway
GO:0042542	response to hydrogen peroxide	309165	Rela	up	04620	Toll-like receptor signaling pathway
GO:0042542	response to hydrogen peroxide	309165	Rela	up	04151	PI3K-Akt signaling pathway
GO:0042542	response to hydrogen peroxide	309165	Rela	up	05162	Measles
GO:0042542	response to hydrogen peroxide	309165	Rela	up	05161	Hepatitis B
GO:0042542	response to hydrogen peroxide	309165	Rela	up	04660	T cell receptor signaling pathway
GO:0042542	response to hydrogen peroxide	309165	Rela	up	04623	Cytosolic DNA-sensing pathway
GO:0042542	response to hydrogen peroxide	309165	Rela	up	05221	Acute myeloid leukemia
GO:0042542	response to hydrogen peroxide	309165	Rela	up	05164	Influenza A
GO:0042542	response to hydrogen peroxide	309165	Rela	up	05169	Epstein-Barr virus infection
GO:0042542	response to hydrogen peroxide	309165	Rela	up	04920	Adipocytokine signaling pathway
GO:0042542	response to hydrogen peroxide	309165	Rela	up	05140	Leishmaniasis
GO:0042542	response to hydrogen peroxide	309165	Rela	up	05145	Toxoplasmosis
GO:0042542	response to hydrogen peroxide	309165	Rela	up	05215	Prostate cancer
GO:0042542	response to hydrogen peroxide	309165	Rela	up	05212	Pancreatic cancer
GO:0042542	response to hydrogen peroxide	309165	Rela	up	05133	Pertussis
GO:0042542	response to hydrogen peroxide	309165	Rela	up	04662	B cell receptor signaling pathway
GO:0042542	response to hydrogen peroxide	24404	Gpx1	up	00480	Glutathione metabolism
GO:0042542	response to hydrogen peroxide	24165	Ada	up	01100	Metabolic pathways
GO:0042542	response to hydrogen peroxide	24165	Ada	up	00230	Purine metabolism
GO:0042542	response to hydrogen peroxide	140914	Olr1	up	03320	PPAR signaling pathway
GO:0009617	response to bacterium	24450	Hmgcs2	up	01100	Metabolic pathways
GO:0009617	response to bacterium	24450	Hmgcs2	up	03320	PPAR signaling pathway
GO:0009617	response to bacterium	24450	Hmgcs2	up	00280	Valine, leucine and isoleucine degradation
GO:0009617	response to bacterium	24450	Hmgcs2	up	00650	Butanoate metabolism
GO:0009617	response to bacterium	24450	Hmgcs2	up	00072	Synthesis and degradation of ketone bodies
GO:0009617	response to bacterium	309165	Rela	up	05160	Hepatitis C
GO:0009617	response to bacterium	309165	Rela	up	04064	NF-kappa B signaling pathway
GO:0009617	response to bacterium	309165	Rela	up	05134	Legionellosis
GO:0009617	response to bacterium	309165	Rela	up	05200	Pathways in cancer
GO:0009617	response to bacterium	309165	Rela	up	05202	Transcriptional misregulation in cancer
GO:0009617	response to bacterium	309165	Rela	up	05152	Tuberculosis
GO:0009617	response to bacterium	309165	Rela	up	05166	HTLV-I infection
GO:0009617	response to bacterium	309165	Rela	up	04380	Osteoclast differentiation
GO:0009617	response to bacterium	309165	Rela	up	05220	Chronic myeloid leukemia
GO:0009617	response to bacterium	309165	Rela	up	05142	Chagas disease (American trypanosomiasis)
GO:0009617	response to bacterium	309165	Rela	up	05132	Salmonella infection
GO:0009617	response to bacterium	309165	Rela	up	04621	NOD-like receptor signaling pathway
GO:0009617	response to bacterium	309165	Rela	up	04062	Chemokine signaling pathway
GO:0009617	response to bacterium	309165	Rela	up	04010	MAPK signaling pathway
GO:0009617	response to bacterium	309165	Rela	up	04066	HIF-1 signaling pathway
GO:0009617	response to bacterium	309165	Rela	up	04620	Toll-like receptor signaling pathway
GO:0009617	response to bacterium	309165	Rela	up	04151	PI3K-Akt signaling pathway
GO:0009617	response to bacterium	309165	Rela	up	05162	Measles
GO:0009617	response to bacterium	309165	Rela	up	05161	Hepatitis B
GO:0009617	response to bacterium	309165	Rela	up	04660	T cell receptor signaling pathway
GO:0009617	response to bacterium	309165	Rela	up	04623	Cytosolic DNA-sensing pathway
GO:0009617	response to bacterium	309165	Rela	up	05221	Acute myeloid leukemia
GO:0009617	response to bacterium	309165	Rela	up	05164	Influenza A
GO:0009617	response to bacterium	309165	Rela	up	05169	Epstein-Barr virus infection
GO:0009617	response to bacterium	309165	Rela	up	04920	Adipocytokine signaling pathway
GO:0009617	response to bacterium	309165	Rela	up	05140	Leishmaniasis
GO:0009617	response to bacterium	309165	Rela	up	05145	Toxoplasmosis
GO:0009617	response to bacterium	309165	Rela	up	05215	Prostate cancer
GO:0009617	response to bacterium	309165	Rela	up	05212	Pancreatic cancer
GO:0009617	response to bacterium	309165	Rela	up	05133	Pertussis
GO:0009617	response to bacterium	309165	Rela	up	04662	B cell receptor signaling pathway
GO:0009617	response to bacterium	316519	Slc11a1	up	04142	Lysosome
GO:0009617	response to bacterium	316519	Slc11a1	up	04978	Mineral absorption
GO:0009617	response to bacterium	29665	P2rx7	up	04080	Neuroactive ligand-receptor interaction
GO:0009617	response to bacterium	24498	Il6	up	04060	Cytokine-cytokine receptor interaction
GO:0009617	response to bacterium	24498	Il6	up	05134	Legionellosis
GO:0009617	response to bacterium	24498	Il6	up	05200	Pathways in cancer
GO:0009617	response to bacterium	24498	Il6	up	05202	Transcriptional misregulation in cancer
GO:0009617	response to bacterium	24498	Il6	up	05152	Tuberculosis
GO:0009617	response to bacterium	24498	Il6	up	05166	HTLV-I infection
GO:0009617	response to bacterium	24498	Il6	up	05142	Chagas disease (American trypanosomiasis)
GO:0009617	response to bacterium	24498	Il6	up	05132	Salmonella infection
GO:0009617	response to bacterium	24498	Il6	up	04621	NOD-like receptor signaling pathway
GO:0009617	response to bacterium	24498	Il6	up	04630	Jak-STAT signaling pathway
GO:0009617	response to bacterium	24498	Il6	up	05143	African trypanosomiasis
GO:0009617	response to bacterium	24498	Il6	up	04066	HIF-1 signaling pathway
GO:0009617	response to bacterium	24498	Il6	up	04620	Toll-like receptor signaling pathway
GO:0009617	response to bacterium	24498	Il6	up	04151	PI3K-Akt signaling pathway
GO:0009617	response to bacterium	24498	Il6	up	05162	Measles
GO:0009617	response to bacterium	24498	Il6	up	05161	Hepatitis B
GO:0009617	response to bacterium	24498	Il6	up	04623	Cytosolic DNA-sensing pathway
GO:0009617	response to bacterium	24498	Il6	up	05144	Malaria
GO:0009617	response to bacterium	24498	Il6	up	05164	Influenza A
GO:0009617	response to bacterium	24498	Il6	up	05323	Rheumatoid arthritis
GO:0009617	response to bacterium	24498	Il6	up	05133	Pertussis
GO:0009617	response to bacterium	81736	Nfkb1	up	05160	Hepatitis C
GO:0009617	response to bacterium	81736	Nfkb1	up	04064	NF-kappa B signaling pathway
GO:0009617	response to bacterium	81736	Nfkb1	up	05134	Legionellosis
GO:0009617	response to bacterium	81736	Nfkb1	up	05200	Pathways in cancer
GO:0009617	response to bacterium	81736	Nfkb1	up	05202	Transcriptional misregulation in cancer
GO:0009617	response to bacterium	81736	Nfkb1	up	05152	Tuberculosis
GO:0009617	response to bacterium	81736	Nfkb1	up	05166	HTLV-I infection
GO:0009617	response to bacterium	81736	Nfkb1	up	04380	Osteoclast differentiation
GO:0009617	response to bacterium	81736	Nfkb1	up	05220	Chronic myeloid leukemia
GO:0009617	response to bacterium	81736	Nfkb1	up	05142	Chagas disease (American trypanosomiasis)
GO:0009617	response to bacterium	81736	Nfkb1	up	05132	Salmonella infection
GO:0009617	response to bacterium	81736	Nfkb1	up	04621	NOD-like receptor signaling pathway
GO:0009617	response to bacterium	81736	Nfkb1	up	04062	Chemokine signaling pathway
GO:0009617	response to bacterium	81736	Nfkb1	up	04010	MAPK signaling pathway
GO:0009617	response to bacterium	81736	Nfkb1	up	04066	HIF-1 signaling pathway
GO:0009617	response to bacterium	81736	Nfkb1	up	04620	Toll-like receptor signaling pathway
GO:0009617	response to bacterium	81736	Nfkb1	up	04151	PI3K-Akt signaling pathway
GO:0009617	response to bacterium	81736	Nfkb1	up	05162	Measles
GO:0009617	response to bacterium	81736	Nfkb1	up	05161	Hepatitis B
GO:0009617	response to bacterium	81736	Nfkb1	up	04660	T cell receptor signaling pathway
GO:0009617	response to bacterium	81736	Nfkb1	up	04623	Cytosolic DNA-sensing pathway
GO:0009617	response to bacterium	81736	Nfkb1	up	05221	Acute myeloid leukemia
GO:0009617	response to bacterium	81736	Nfkb1	up	05164	Influenza A
GO:0009617	response to bacterium	81736	Nfkb1	up	05169	Epstein-Barr virus infection
GO:0009617	response to bacterium	81736	Nfkb1	up	04920	Adipocytokine signaling pathway
GO:0009617	response to bacterium	81736	Nfkb1	up	05140	Leishmaniasis
GO:0009617	response to bacterium	81736	Nfkb1	up	05145	Toxoplasmosis
GO:0009617	response to bacterium	81736	Nfkb1	up	05215	Prostate cancer
GO:0009617	response to bacterium	81736	Nfkb1	up	05212	Pancreatic cancer
GO:0009617	response to bacterium	81736	Nfkb1	up	05133	Pertussis
GO:0009617	response to bacterium	81736	Nfkb1	up	04662	B cell receptor signaling pathway
GO:0001889	liver development	50662	Runx1	up	05200	Pathways in cancer
GO:0001889	liver development	50662	Runx1	up	05202	Transcriptional misregulation in cancer
GO:0001889	liver development	50662	Runx1	up	05220	Chronic myeloid leukemia
GO:0001889	liver development	50662	Runx1	up	05221	Acute myeloid leukemia
GO:0001889	liver development	24165	Ada	up	01100	Metabolic pathways
GO:0001889	liver development	24165	Ada	up	00230	Purine metabolism
GO:0001889	liver development	29539	Aldh2	up	01100	Metabolic pathways
GO:0001889	liver development	29539	Aldh2	up	00280	Valine, leucine and isoleucine degradation
GO:0001889	liver development	29539	Aldh2	up	00410	beta-Alanine metabolism
GO:0001889	liver development	29539	Aldh2	up	00071	Fatty acid degradation
GO:0001889	liver development	29539	Aldh2	up	00310	Lysine degradation
GO:0001889	liver development	29539	Aldh2	up	00561	Glycerolipid metabolism
GO:0001889	liver development	29539	Aldh2	up	00330	Arginine and proline metabolism
GO:0001889	liver development	24329	Egfr	up	05160	Hepatitis C
GO:0001889	liver development	24329	Egfr	up	04060	Cytokine-cytokine receptor interaction
GO:0001889	liver development	24329	Egfr	up	05200	Pathways in cancer
GO:0001889	liver development	24329	Egfr	up	04010	MAPK signaling pathway
GO:0001889	liver development	24329	Egfr	up	04066	HIF-1 signaling pathway
GO:0001889	liver development	24329	Egfr	up	04151	PI3K-Akt signaling pathway
GO:0001889	liver development	24329	Egfr	up	05215	Prostate cancer
GO:0001889	liver development	24329	Egfr	up	04012	ErbB signaling pathway
GO:0001889	liver development	24329	Egfr	up	05212	Pancreatic cancer
GO:0001889	liver development	24329	Egfr	up	05219	Bladder cancer
GO:0001889	liver development	309165	Rela	up	05160	Hepatitis C
GO:0001889	liver development	309165	Rela	up	04064	NF-kappa B signaling pathway
GO:0001889	liver development	309165	Rela	up	05134	Legionellosis
GO:0001889	liver development	309165	Rela	up	05200	Pathways in cancer
GO:0001889	liver development	309165	Rela	up	05202	Transcriptional misregulation in cancer
GO:0001889	liver development	309165	Rela	up	05152	Tuberculosis
GO:0001889	liver development	309165	Rela	up	05166	HTLV-I infection
GO:0001889	liver development	309165	Rela	up	04380	Osteoclast differentiation
GO:0001889	liver development	309165	Rela	up	05220	Chronic myeloid leukemia
GO:0001889	liver development	309165	Rela	up	05142	Chagas disease (American trypanosomiasis)
GO:0001889	liver development	309165	Rela	up	05132	Salmonella infection
GO:0001889	liver development	309165	Rela	up	04621	NOD-like receptor signaling pathway
GO:0001889	liver development	309165	Rela	up	04062	Chemokine signaling pathway
GO:0001889	liver development	309165	Rela	up	04010	MAPK signaling pathway
GO:0001889	liver development	309165	Rela	up	04066	HIF-1 signaling pathway
GO:0001889	liver development	309165	Rela	up	04620	Toll-like receptor signaling pathway
GO:0001889	liver development	309165	Rela	up	04151	PI3K-Akt signaling pathway
GO:0001889	liver development	309165	Rela	up	05162	Measles
GO:0001889	liver development	309165	Rela	up	05161	Hepatitis B
GO:0001889	liver development	309165	Rela	up	04660	T cell receptor signaling pathway
GO:0001889	liver development	309165	Rela	up	04623	Cytosolic DNA-sensing pathway
GO:0001889	liver development	309165	Rela	up	05221	Acute myeloid leukemia
GO:0001889	liver development	309165	Rela	up	05164	Influenza A
GO:0001889	liver development	309165	Rela	up	05169	Epstein-Barr virus infection
GO:0001889	liver development	309165	Rela	up	04920	Adipocytokine signaling pathway
GO:0001889	liver development	309165	Rela	up	05140	Leishmaniasis
GO:0001889	liver development	309165	Rela	up	05145	Toxoplasmosis
GO:0001889	liver development	309165	Rela	up	05215	Prostate cancer
GO:0001889	liver development	309165	Rela	up	05212	Pancreatic cancer
GO:0001889	liver development	309165	Rela	up	05133	Pertussis
GO:0001889	liver development	309165	Rela	up	04662	B cell receptor signaling pathway
GO:0001889	liver development	79238	Hmgcl	up	01100	Metabolic pathways
GO:0001889	liver development	79238	Hmgcl	up	00280	Valine, leucine and isoleucine degradation
GO:0001889	liver development	79238	Hmgcl	up	04146	Peroxisome
GO:0001889	liver development	79238	Hmgcl	up	00650	Butanoate metabolism
GO:0001889	liver development	79238	Hmgcl	up	00072	Synthesis and degradation of ketone bodies
GO:0001889	liver development	64192	Qdpr	up	01100	Metabolic pathways
GO:0001889	liver development	24450	Hmgcs2	up	01100	Metabolic pathways
GO:0001889	liver development	24450	Hmgcs2	up	03320	PPAR signaling pathway
GO:0001889	liver development	24450	Hmgcs2	up	00280	Valine, leucine and isoleucine degradation
GO:0001889	liver development	24450	Hmgcs2	up	00650	Butanoate metabolism
GO:0001889	liver development	24450	Hmgcs2	up	00072	Synthesis and degradation of ketone bodies
GO:0001666	response to hypoxia	140942	Ddit4	up	04151	PI3K-Akt signaling pathway
GO:0001666	response to hypoxia	81687	Mmp9	up	05200	Pathways in cancer
GO:0001666	response to hypoxia	81687	Mmp9	up	05202	Transcriptional misregulation in cancer
GO:0001666	response to hypoxia	81687	Mmp9	up	05161	Hepatitis B
GO:0001666	response to hypoxia	81687	Mmp9	up	04670	Leukocyte transendothelial migration
GO:0001666	response to hypoxia	81687	Mmp9	up	05219	Bladder cancer
GO:0001666	response to hypoxia	81809	Tgfb2	up	04060	Cytokine-cytokine receptor interaction
GO:0001666	response to hypoxia	81809	Tgfb2	up	05200	Pathways in cancer
GO:0001666	response to hypoxia	81809	Tgfb2	up	05152	Tuberculosis
GO:0001666	response to hypoxia	81809	Tgfb2	up	05166	HTLV-I infection
GO:0001666	response to hypoxia	81809	Tgfb2	up	04380	Osteoclast differentiation
GO:0001666	response to hypoxia	81809	Tgfb2	up	05220	Chronic myeloid leukemia
GO:0001666	response to hypoxia	81809	Tgfb2	up	05142	Chagas disease (American trypanosomiasis)
GO:0001666	response to hypoxia	81809	Tgfb2	up	04010	MAPK signaling pathway
GO:0001666	response to hypoxia	81809	Tgfb2	up	05161	Hepatitis B
GO:0001666	response to hypoxia	81809	Tgfb2	up	05144	Malaria
GO:0001666	response to hypoxia	81809	Tgfb2	up	05140	Leishmaniasis
GO:0001666	response to hypoxia	81809	Tgfb2	up	04350	TGF-beta signaling pathway
GO:0001666	response to hypoxia	81809	Tgfb2	up	05145	Toxoplasmosis
GO:0001666	response to hypoxia	81809	Tgfb2	up	05323	Rheumatoid arthritis
GO:0001666	response to hypoxia	81809	Tgfb2	up	05212	Pancreatic cancer
GO:0001666	response to hypoxia	362850	Angptl4	up	03320	PPAR signaling pathway
GO:0001666	response to hypoxia	25361	Vcam1	up	04064	NF-kappa B signaling pathway
GO:0001666	response to hypoxia	25361	Vcam1	up	05166	HTLV-I infection
GO:0001666	response to hypoxia	25361	Vcam1	up	05143	African trypanosomiasis
GO:0001666	response to hypoxia	25361	Vcam1	up	05144	Malaria
GO:0001666	response to hypoxia	25361	Vcam1	up	04514	Cell adhesion molecules (CAMs)
GO:0001666	response to hypoxia	25361	Vcam1	up	04670	Leukocyte transendothelial migration
GO:0001666	response to hypoxia	24165	Ada	up	01100	Metabolic pathways
GO:0001666	response to hypoxia	24165	Ada	up	00230	Purine metabolism
GO:0001666	response to hypoxia	25747	Ppara	up	05160	Hepatitis C
GO:0001666	response to hypoxia	25747	Ppara	up	03320	PPAR signaling pathway
GO:0001666	response to hypoxia	25747	Ppara	up	04920	Adipocytokine signaling pathway
GO:0001666	response to hypoxia	79239	Hmox2	up	04978	Mineral absorption
GO:0001666	response to hypoxia	50646	Ptk2b	up	04062	Chemokine signaling pathway
GO:0001666	response to hypoxia	50646	Ptk2b	up	05161	Hepatitis B
GO:0001666	response to hypoxia	50646	Ptk2b	up	04670	Leukocyte transendothelial migration
GO:0001666	response to hypoxia	25464	Icam1	up	04064	NF-kappa B signaling pathway
GO:0001666	response to hypoxia	25464	Icam1	up	05166	HTLV-I infection
GO:0001666	response to hypoxia	25464	Icam1	up	05143	African trypanosomiasis
GO:0001666	response to hypoxia	25464	Icam1	up	05144	Malaria
GO:0001666	response to hypoxia	25464	Icam1	up	04514	Cell adhesion molecules (CAMs)
GO:0001666	response to hypoxia	25464	Icam1	up	05164	Influenza A
GO:0001666	response to hypoxia	25464	Icam1	up	05169	Epstein-Barr virus infection
GO:0001666	response to hypoxia	25464	Icam1	up	04670	Leukocyte transendothelial migration
GO:0001666	response to hypoxia	25464	Icam1	up	05323	Rheumatoid arthritis
GO:0034097	response to cytokine stimulus	309452	Nfkb2	up	04064	NF-kappa B signaling pathway
GO:0034097	response to cytokine stimulus	309452	Nfkb2	up	05134	Legionellosis
GO:0034097	response to cytokine stimulus	309452	Nfkb2	up	05200	Pathways in cancer
GO:0034097	response to cytokine stimulus	309452	Nfkb2	up	05166	HTLV-I infection
GO:0034097	response to cytokine stimulus	309452	Nfkb2	up	04380	Osteoclast differentiation
GO:0034097	response to cytokine stimulus	309452	Nfkb2	up	04010	MAPK signaling pathway
GO:0034097	response to cytokine stimulus	309452	Nfkb2	up	05169	Epstein-Barr virus infection
GO:0034097	response to cytokine stimulus	497942	Cxcl16	up	04060	Cytokine-cytokine receptor interaction
GO:0034097	response to cytokine stimulus	497942	Cxcl16	up	04062	Chemokine signaling pathway
GO:0034097	response to cytokine stimulus	24617	Serpine1	up	05142	Chagas disease (American trypanosomiasis)
GO:0034097	response to cytokine stimulus	24617	Serpine1	up	04066	HIF-1 signaling pathway
GO:0034097	response to cytokine stimulus	24617	Serpine1	up	04610	Complement and coagulation cascades
GO:0034097	response to cytokine stimulus	24617	Serpine1	up	04115	p53 signaling pathway
GO:0034097	response to cytokine stimulus	25544	Sele	up	05143	African trypanosomiasis
GO:0034097	response to cytokine stimulus	25544	Sele	up	05144	Malaria
GO:0034097	response to cytokine stimulus	25544	Sele	up	04514	Cell adhesion molecules (CAMs)
GO:0034097	response to cytokine stimulus	81809	Tgfb2	up	04060	Cytokine-cytokine receptor interaction
GO:0034097	response to cytokine stimulus	81809	Tgfb2	up	05200	Pathways in cancer
GO:0034097	response to cytokine stimulus	81809	Tgfb2	up	05152	Tuberculosis
GO:0034097	response to cytokine stimulus	81809	Tgfb2	up	05166	HTLV-I infection
GO:0034097	response to cytokine stimulus	81809	Tgfb2	up	04380	Osteoclast differentiation
GO:0034097	response to cytokine stimulus	81809	Tgfb2	up	05220	Chronic myeloid leukemia
GO:0034097	response to cytokine stimulus	81809	Tgfb2	up	05142	Chagas disease (American trypanosomiasis)
GO:0034097	response to cytokine stimulus	81809	Tgfb2	up	04010	MAPK signaling pathway
GO:0034097	response to cytokine stimulus	81809	Tgfb2	up	05161	Hepatitis B
GO:0034097	response to cytokine stimulus	81809	Tgfb2	up	05144	Malaria
GO:0034097	response to cytokine stimulus	81809	Tgfb2	up	05140	Leishmaniasis
GO:0034097	response to cytokine stimulus	81809	Tgfb2	up	04350	TGF-beta signaling pathway
GO:0034097	response to cytokine stimulus	81809	Tgfb2	up	05145	Toxoplasmosis
GO:0034097	response to cytokine stimulus	81809	Tgfb2	up	05323	Rheumatoid arthritis
GO:0034097	response to cytokine stimulus	81809	Tgfb2	up	05212	Pancreatic cancer
GO:0034097	response to cytokine stimulus	25445	Fosl1	up	05166	HTLV-I infection
GO:0034097	response to cytokine stimulus	25445	Fosl1	up	04380	Osteoclast differentiation
GO:0034097	response to cytokine stimulus	309165	Rela	up	05160	Hepatitis C
GO:0034097	response to cytokine stimulus	309165	Rela	up	04064	NF-kappa B signaling pathway
GO:0034097	response to cytokine stimulus	309165	Rela	up	05134	Legionellosis
GO:0034097	response to cytokine stimulus	309165	Rela	up	05200	Pathways in cancer
GO:0034097	response to cytokine stimulus	309165	Rela	up	05202	Transcriptional misregulation in cancer
GO:0034097	response to cytokine stimulus	309165	Rela	up	05152	Tuberculosis
GO:0034097	response to cytokine stimulus	309165	Rela	up	05166	HTLV-I infection
GO:0034097	response to cytokine stimulus	309165	Rela	up	04380	Osteoclast differentiation
GO:0034097	response to cytokine stimulus	309165	Rela	up	05220	Chronic myeloid leukemia
GO:0034097	response to cytokine stimulus	309165	Rela	up	05142	Chagas disease (American trypanosomiasis)
GO:0034097	response to cytokine stimulus	309165	Rela	up	05132	Salmonella infection
GO:0034097	response to cytokine stimulus	309165	Rela	up	04621	NOD-like receptor signaling pathway
GO:0034097	response to cytokine stimulus	309165	Rela	up	04062	Chemokine signaling pathway
GO:0034097	response to cytokine stimulus	309165	Rela	up	04010	MAPK signaling pathway
GO:0034097	response to cytokine stimulus	309165	Rela	up	04066	HIF-1 signaling pathway
GO:0034097	response to cytokine stimulus	309165	Rela	up	04620	Toll-like receptor signaling pathway
GO:0034097	response to cytokine stimulus	309165	Rela	up	04151	PI3K-Akt signaling pathway
GO:0034097	response to cytokine stimulus	309165	Rela	up	05162	Measles
GO:0034097	response to cytokine stimulus	309165	Rela	up	05161	Hepatitis B
GO:0034097	response to cytokine stimulus	309165	Rela	up	04660	T cell receptor signaling pathway
GO:0034097	response to cytokine stimulus	309165	Rela	up	04623	Cytosolic DNA-sensing pathway
GO:0034097	response to cytokine stimulus	309165	Rela	up	05221	Acute myeloid leukemia
GO:0034097	response to cytokine stimulus	309165	Rela	up	05164	Influenza A
GO:0034097	response to cytokine stimulus	309165	Rela	up	05169	Epstein-Barr virus infection
GO:0034097	response to cytokine stimulus	309165	Rela	up	04920	Adipocytokine signaling pathway
GO:0034097	response to cytokine stimulus	309165	Rela	up	05140	Leishmaniasis
GO:0034097	response to cytokine stimulus	309165	Rela	up	05145	Toxoplasmosis
GO:0034097	response to cytokine stimulus	309165	Rela	up	05215	Prostate cancer
GO:0034097	response to cytokine stimulus	309165	Rela	up	05212	Pancreatic cancer
GO:0034097	response to cytokine stimulus	309165	Rela	up	05133	Pertussis
GO:0034097	response to cytokine stimulus	309165	Rela	up	04662	B cell receptor signaling pathway
GO:0034097	response to cytokine stimulus	59103	Ptges	up	01100	Metabolic pathways
GO:0034097	response to cytokine stimulus	24498	Il6	up	04060	Cytokine-cytokine receptor interaction
GO:0034097	response to cytokine stimulus	24498	Il6	up	05134	Legionellosis
GO:0034097	response to cytokine stimulus	24498	Il6	up	05200	Pathways in cancer
GO:0034097	response to cytokine stimulus	24498	Il6	up	05202	Transcriptional misregulation in cancer
GO:0034097	response to cytokine stimulus	24498	Il6	up	05152	Tuberculosis
GO:0034097	response to cytokine stimulus	24498	Il6	up	05166	HTLV-I infection
GO:0034097	response to cytokine stimulus	24498	Il6	up	05142	Chagas disease (American trypanosomiasis)
GO:0034097	response to cytokine stimulus	24498	Il6	up	05132	Salmonella infection
GO:0034097	response to cytokine stimulus	24498	Il6	up	04621	NOD-like receptor signaling pathway
GO:0034097	response to cytokine stimulus	24498	Il6	up	04630	Jak-STAT signaling pathway
GO:0034097	response to cytokine stimulus	24498	Il6	up	05143	African trypanosomiasis
GO:0034097	response to cytokine stimulus	24498	Il6	up	04066	HIF-1 signaling pathway
GO:0034097	response to cytokine stimulus	24498	Il6	up	04620	Toll-like receptor signaling pathway
GO:0034097	response to cytokine stimulus	24498	Il6	up	04151	PI3K-Akt signaling pathway
GO:0034097	response to cytokine stimulus	24498	Il6	up	05162	Measles
GO:0034097	response to cytokine stimulus	24498	Il6	up	05161	Hepatitis B
GO:0034097	response to cytokine stimulus	24498	Il6	up	04623	Cytosolic DNA-sensing pathway
GO:0034097	response to cytokine stimulus	24498	Il6	up	05144	Malaria
GO:0034097	response to cytokine stimulus	24498	Il6	up	05164	Influenza A
GO:0034097	response to cytokine stimulus	24498	Il6	up	05323	Rheumatoid arthritis
GO:0034097	response to cytokine stimulus	24498	Il6	up	05133	Pertussis
GO:0071356	cellular response to tumor necrosis factor	309165	Rela	up	05160	Hepatitis C
GO:0071356	cellular response to tumor necrosis factor	309165	Rela	up	04064	NF-kappa B signaling pathway
GO:0071356	cellular response to tumor necrosis factor	309165	Rela	up	05134	Legionellosis
GO:0071356	cellular response to tumor necrosis factor	309165	Rela	up	05200	Pathways in cancer
GO:0071356	cellular response to tumor necrosis factor	309165	Rela	up	05202	Transcriptional misregulation in cancer
GO:0071356	cellular response to tumor necrosis factor	309165	Rela	up	05152	Tuberculosis
GO:0071356	cellular response to tumor necrosis factor	309165	Rela	up	05166	HTLV-I infection
GO:0071356	cellular response to tumor necrosis factor	309165	Rela	up	04380	Osteoclast differentiation
GO:0071356	cellular response to tumor necrosis factor	309165	Rela	up	05220	Chronic myeloid leukemia
GO:0071356	cellular response to tumor necrosis factor	309165	Rela	up	05142	Chagas disease (American trypanosomiasis)
GO:0071356	cellular response to tumor necrosis factor	309165	Rela	up	05132	Salmonella infection
GO:0071356	cellular response to tumor necrosis factor	309165	Rela	up	04621	NOD-like receptor signaling pathway
GO:0071356	cellular response to tumor necrosis factor	309165	Rela	up	04062	Chemokine signaling pathway
GO:0071356	cellular response to tumor necrosis factor	309165	Rela	up	04010	MAPK signaling pathway
GO:0071356	cellular response to tumor necrosis factor	309165	Rela	up	04066	HIF-1 signaling pathway
GO:0071356	cellular response to tumor necrosis factor	309165	Rela	up	04620	Toll-like receptor signaling pathway
GO:0071356	cellular response to tumor necrosis factor	309165	Rela	up	04151	PI3K-Akt signaling pathway
GO:0071356	cellular response to tumor necrosis factor	309165	Rela	up	05162	Measles
GO:0071356	cellular response to tumor necrosis factor	309165	Rela	up	05161	Hepatitis B
GO:0071356	cellular response to tumor necrosis factor	309165	Rela	up	04660	T cell receptor signaling pathway
GO:0071356	cellular response to tumor necrosis factor	309165	Rela	up	04623	Cytosolic DNA-sensing pathway
GO:0071356	cellular response to tumor necrosis factor	309165	Rela	up	05221	Acute myeloid leukemia
GO:0071356	cellular response to tumor necrosis factor	309165	Rela	up	05164	Influenza A
GO:0071356	cellular response to tumor necrosis factor	309165	Rela	up	05169	Epstein-Barr virus infection
[truncated: 4,997 more rows]

## Sheet: Sheet1
Stat1	up
Creb3l2	up
Mef2c	up
Egf	up
Dnmt1	up
Wwp1	up
Hdac7	up
Rps6ka5	up
Sin3a	up
Cdkn1b	up
Mecom	up
Whsc1	up
Rbl2	up
Cycs	up
Ace	up
Atm	up
Tlr3	up
Trim37	up
Inpp4b	up
Prom1	up
Trim32	up
Lmo2	up
Adh6	up
Traf3	up
Alg2	up
Map3k12	up
Hoxd10	up
Mavs	up
Meis1	up
Tfdp2	up
Fgf9	up
Anpep	up
Plau	up
Adam10	up
Hspa2	up
Agtr1b	up
Pi4kb	up
Adrbk2	up
Snca	up
Smad6	up
Polb	up
Itpr2	up
Tfrc	up
Ube2n	up
Eif2ak3	up
Dgkz	up
Nme7	up
Ndufs4	up
Ndst1	up
Fbxo4	up
Rgn	up
Rbl1	up
Sh3gl2	up
Cacnb2	up
Lpcat1	up
Lss	up
Nme6	up
Mboat2	up
Pld1	up
Capn1	up
Dnm1	up
Inpp5j	up
Ocln	up
Crnkl1	up
Gcnt1	up
Pygb	up
Ganc	up
Cdc14b	up
Dut	up
Slc33a1	up
Scp2	up
Ggps1	up
Serpine1	down
Cdkn1a	down
Nr4a3	down
Angptl4	down
Pim1	down
Sgk1	down
Il6	down
Plaur	down
Ptk2b	down
Tgfb2	down
Cebpb	down
Rela	down
Gpx1	down
Angpt4	down
Vnn1	down
Egfr	down
Ada	down
Aldh2	down
Nrg1	down
Nfkb1	down
Nfkb2	down
F3	down
Dusp10	down
Cxcl1	down
Vcam1	down
P2rx7	down
Mmp9	down
Ptges	down
Slc11a1	down
Nfkbia	down
Icam1	down
Csf2rb	down
F2rl1	down
Cxcl2	down
Olr1	down
Map2k3	down
Il23a	down
Sele	down
Cxcl11	down
Nfkbiz	down
Pde3b	down
Fga	down
Gsk3a	down
Pde10a	down
Cblb	down
Hhip	down
Pex11a	down
Tnfrsf21	down
P2rx4	down
Sema5a	down
Hyal2	down
S1pr1	down
Foxo3	down
Runx1	down
Nr1h3	down
Lpin2	down
Vdr	down
Crem	down
Ppara	down
Fosl1	down
Gstt1	down
Hmgcs2	down
Flt3	down
Sds	down
Gna12	down
Xbp1	down
Ppat	down
Map3k6	down
Hmgcl	down
Qdpr	down
Ddit4	down
Hmox2	down
Cxcl16	down
Gpd1	down
Cox4i1	down
Cubn	down
Pvrl1	down
Cdh2	down
Sorbs1	down
Hbegf	down
Scarb1	down
Il22ra1	down
Sema6b	down
Sqstm1	down
Sstr5	down
Pck1	down
Herpud1	down
Hspa4l	down
Zfp36	down
Gadd45b	down
Inhbb	down
Etnk2	down
Cyp4a1	down
Idua	down
Cfi	down
Bcl10	down
Adh1	down
Gstm1	down
Pipox	down
Mthfd1	down
Cyp1b1	down
Aass	down
Rel	down
Pc	down
Sema4b	down
Sema4g	down
Spry4	down
Ppp2r1a	down
Calcr	down
Mchr1	down
Map3k8	down
Sept8	down
Tmprss13	down
Masp1	down
Ctsa	down
Ctsd	down
Ctsf	down
Got2	down
Chrd	down
Lpar3	down
Il2ra	down
Npc2	down
Napa	down
Tpm3	down
Ak7	down
Shmt2	down
Ggcx	down
Steap2	down
Ncoa4	down
Bhmt	down
Preb	down
Ehhadh	down
Pnpla2	down
Sema4c	down
Bcat1	down
B4galnt1	down
Rprm	down
Dnm3	down
Agpat9	down
Amt	down
Dusp16	down
Ap2a1	down
Ifngr1	down
Gcat	down
Pla2g15	down
Mgat5	down
B3gnt5	down
Acy3	down
Pde9a	down
Entpd3	down
Dpys	down
