# Supplementary material for: Integrative microRNA-gene expression network analysis in genetic hypercalciuric stone-forming rat kidney
Source: PeerJ. 2016 Mar 31;4:e1884. doi: 10.7717/peerj.1884 (PMC4824905; doi:10.7717/peerj.1884)
Supplement: Table S13 — Real-time qPCR delta-Ct values of 12 pairs of GHS rats and controls. [file peerj-04-1884-s013.xlsx]

## Sheet: miRNA
	rno-miR-184		rno-miR-21-3p		rno-miR-672-5p		rno-miR-674-5p		rno-miR-206-3p		rno-miR-196c-3p		rno-miR-138-5p		rno-miR-203a-3p		rno-miR-201-3p		rno-miR-138-1-3p		rno-miR-484
	ΔCt-SD	ΔCt-GHS	ΔCt-SD	ΔCt-GHS	ΔCt-SD	ΔCt-GHS	ΔCt-SD	ΔCt-GHS	ΔCt-SD	ΔCt-GHS	ΔCt-SD	ΔCt-GHS	ΔCt-SD	ΔCt-GHS	ΔCt-SD	ΔCt-GHS	ΔCt-SD	ΔCt-GHS	ΔCt-SD	ΔCt-GHS	ΔCt-SD	ΔCt-GHS
1	15.58	10.94	6.31	3.81	5.74	4.32	8.99	8.27	4.13	3.58	2.79	2.83	6.38	8.69	11.69	12.37	7.69	9.09	6.79	9.37	4.89	8.41
2	16.01	11.73	6.86	4.36	4.28	2.78	9.22	8.63	4.82	3.72	3.68	3.24	6.56	7.98	11.77	12.46	8.98	8.92	5.28	8.86	5.22	8.32
3	14.35	9.88	6.93	4.38	5.17	3.66	9.27	8.79	4.67	3.99	3.31	3.82	5.67	7.82	11.89	12.46	7.74	9.17	5.57	9.39	5.31	7.99
4	15.37	10.69	6.95	4.63	4.71	4.21	9.31	8.89	5.56	4.73	3.52	2.97	6.19	8.43	11.96	12.58	8.07	9.48	5.96	9.01	4.97	8.67
5	14.87	11.15	7.19	4.71	5.55	3.58	9.53	8.97	4.48	3.21	3.77	3.56	5.84	8.51	12.17	12.71	8.62	8.72	5.87	8.96	4.48	8.42
6	15.22	11.27	7.21	4.89	4.28	4.12	9.73	9.03	5.17	3.96	2.99	3.78	6.18	8.33	12.34	12.87	8.53	8.97	6.62	8.31	5.26	8.85
7	15.22	12.28	7.26	5.01	5.74	3.83	9.82	9.11	5.62	4.19	3.63	2.81	5.55	7.73	12.37	12.95	7.49	9.11	6.31	8.76	4.79	9.12
8	15.34	11.31	7.38	5.21	5.56	3.93	10	9.16	4.89	4.87	3.52	3.47	5.57	7.95	12.47	12.96	8.47	9.34	6.54	9.22	5.71	8.68
9	15.42	11.11	7.43	5.28	4.88	3.66	10.01	9.28	5.01	4.62	3.71	3.51	6.32	8.41	12.58	13.09	8.33	8.97	5.79	8.67	4.36	7.97
10	16.01	12.38	8.01	5.28	4.96	4.21	10.33	9.32	4.97	4.81	2.97	3.18	5.98	8.07	12.95	13.72	8.62	9.36	6.42	8.89	4.52	8.32
11	15.77	11.82	8.03	5.32	4.73	3.89	10.67	9.36	4.42	4.52	3.28	2.95	6.82	9.1	13.08	13.73	7.87	9.79	5.86	8.72	4.81	8.55
12	16.83	12.35	8.55	5.53	5.28	4.17	10.86	10.12	5.07	5.19	3.49	3.21	6.01	8.28	13.13	13.77	8.43	9.27	6.17	9.33	5.44	7.71
	rno-miR-184
	rno-miR-21-3p
	rno-miR-672-5p
	rno-miR-674-5p
	rno-miR-206-3p
	rno-miR-196c-3p
	rno-miR-138-5p
	rno-miR-203a-3p
	rno-miR-201-3p
	rno-miR-138-1-3p
	rno-miR-484
			-1.64181	-1.12631	4.62761	1.52424	2.09022	7.75485	11.5926
			-0.622116	-0.32785	0.837958	0.0896085	0.868532	2.96198	4.19706
			-1.64181	-0.622116
			-1.12631	-0.32785
			4.62761	0.837958
			1.52424	0.0896085
			2.09022	0.868532
			7.75485	2.96198
			11.5926	4.19706

## Sheet: mRNA
	Gcnt1		Lpin2		Olr1		Sema5a		NfκB		Rela		VDR		CaSR
	ΔCt-SD	ΔCt-GHS	ΔCt-SD	ΔCt-GHS	ΔCt-SD	ΔCt-GHS	ΔCt-SD	ΔCt-GHS	ΔCt-SD	ΔCt-GHS	ΔCt-SD	ΔCt-GHS	ΔCt-SD	ΔCt-GHS	ΔCt-SD	ΔCt-GHS
1	6.67	7.86	3.69	1.65	12.79	11.15	9.84	8.65	14.79	13.25	7.58	6.98	10.15	9.38	7.07	5.58
2	6.72	7.73	4.18	1.87	12.63	11.77	9.18	7.98	14.68	13.56	8.44	8.13	10.93	9.96	7.12	5.42
3	6.43	7.52	3.52	2.29	12.38	10.37	8.76	8.12	13.52	14.18	7.63	7.52	11.57	9.77	6.99	6.17
4	6.86	8.17	3.97	2.13	12.16	11.22	9.21	7.63	14.78	13.96	7.98	7.35	10.58	8.93	7.73	5.89
5	5.99	7.94	3.22	1.85	11.93	10.58	10.07	8.56	15.11	14.22	8.17	6.98	11.22	9.32	7.25	5.77
6	6.24	8.05	3.35	2.66	12.07	10.79	8.98	7.49	14.82	14.37	7.33	7.52	11.37	9.57	7.17	6.11
7	6.35	7.86	3.67	1.43	12.84	10.22	9.35	8.17	13.89	13.55	8.22	7.63	10.67	9.43	6.86	5.82
8	6.77	7.67	3.82	1.97	12.77	10.76	9.47	8.55	14.86	13.58	7.65	6.77	10.32	8.89	6.93	5.68
9	6.52	7.99	3.55	2.15	13.03	12.08	9.62	8.68	14.73	14.29	8.41	7.56	9.98	9.58	7.15	6.32
10	6.18	7.42	4.47	2.56	11.89	10.53	8.78	8.22	15.22	13.88	7.89	8.01	10.22	9.72	7.62	5.71
11	7.01	7.53	4.12	3.01	12.55	11.21	9.53	8.31	15.01	13.97	8.43	6.78	11.05	9.43	8.03	6.35
12	6.64	7.69	3.86	2.33	12.64	10.89	9.17	7.59	14.72	14.55	8.06	6.43	10.87	10.07	7.55	6.62
